# Supplementary material for: Na+/K+-ATPase Is Present in Scrapie-Associated Fibrils, Modulates PrP Misfolding In Vitro and Links PrP Function and Dysfunction
Source: PubMed Central journal article supplement (PMC3206849; doi:10.1371/journal.pone.0026813), 2011-11-02
Supplement: pone.0026813.s004.pdf [file pone.0026813.s004.pdf]

## Mascot Search Results

User : Dominic  
 Email : dominic.kurian@bbsrc.ac.uk  
 Search title : IPI Mouse\_15-02-2010  
 MS data file : D:\Peaklist\Dominic Kurian\QToF\DK20010806 GATC P 0010884.pk1  
 Database : IPI\_mouse MOUSE\_v3\_79 (54943 sequences; 24917557 residues)  
 Timestamp : 15 Feb 2011 at 15:26:16 GMT  
 Protein hits : [IPI00420725](#) Tax\_Id=10090 Gene\_Symbol=Camk2a Uncharacterized protein  
[IPI00875723](#) Tax\_Id=10090 Gene\_Symbol=Camk2b 68 kDa protein  
[IPI00112584](#) Tax\_Id=10090 Gene\_Symbol=Camk2d Isoform 1 of Calcium/calmodulin-dependent protein kinase type II subunit  
[IPI00608020](#) Tax\_Id=10090 Gene\_Symbol=Ftl1 ferritin light chain 1  
[IPI00347110](#) Tax\_Id=10090 Gene\_Symbol=Krt73 Keratin, type II cytoskeletal 73  
[IPI00625729](#) Tax\_Id=10090 Gene\_Symbol=Krt1 Keratin, type II cytoskeletal 1  
[IPI00222228](#) Tax\_Id=10090 Gene\_Symbol=4732456N10Rik hypothetical protein LOC239673  
[IPI00138892](#) Tax\_Id=10090 Gene\_Symbol=Uba52 Ubiquitin-60S ribosomal protein L40  
[IPI00874682](#) Tax\_Id=10090 Gene\_Symbol=- 36 kDa protein  
[IPI00223714](#) Tax\_Id=10090 Gene\_Symbol=Hist1hle Histone H1.4

### IPI\_mouse [Decoy](#) False discovery rate

|                                                      |    |   |        |
|------------------------------------------------------|----|---|--------|
| Peptide matches above identity threshold             | 65 | 0 | 0.00 % |
| Peptide matches above homology or identity threshold | 75 | 0 | 0.00 % |

### Probability Based Mowse Score

Ions score is  $-10 \cdot \log(P)$ , where P is the probability that the observed match is a random event.  
 Individual ions scores > 37 indicate identity or extensive homology ( $p < 0.01$ ).  
 Protein scores are derived from ions scores as a non-probabilistic basis for ranking protein hits.

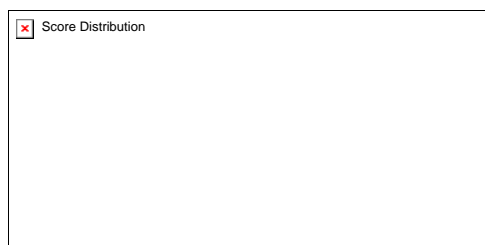

### Peptide Summary Report

Format As [Peptide Summary](#) [Help](#)  
 Significance threshold  $p < 0.01$  Max. number of hits [AUTO](#)  
 Standard scoring  MudPIT scoring  Ions score or expect cut-off  Show sub-sets   
 Show pop-ups  Suppress pop-ups  Sort unassigned [Decreasing Score](#) Require bold red

Error tolerant

1. [IPI00420725](#) Mass: 55882 Score: 1043 Queries matched: 83 emPAI: 0.33

Tax\_Id=10090 Gene\_Symbol=Camk2a Uncharacterized protein

Check to include this hit in error tolerant search or archive report

| Query                                                   | Observed | Mr(expt)  | Mr(calc)  | ppm    | Miss | Score | Expect   | Rank | Peptide         |
|---------------------------------------------------------|----------|-----------|-----------|--------|------|-------|----------|------|-----------------|
| <input checked="" type="checkbox"/> <a href="#">105</a> | 463.2481 | 924.4816  | 924.4777  | 4.26   | 1    | 2     | 39       | 1    | R.DHQKLER.E     |
| <input checked="" type="checkbox"/> <a href="#">183</a> | 574.3185 | 1146.6224 | 1146.6431 | -17.98 | 0    | (0)   | 75       | 3    | K.GAILTTMLATR.N |
| <input checked="" type="checkbox"/> <a href="#">184</a> | 574.3212 | 1146.6278 | 1146.6431 | -13.27 | 0    | (39)  | 0.0084   | 1    | K.GAILTTMLATR.N |
| <input checked="" type="checkbox"/> <a href="#">190</a> | 574.3264 | 1146.6382 | 1146.6431 | -4.20  | 0    | (35)  | 0.022    | 1    | K.GAILTTMLATR.N |
| <input checked="" type="checkbox"/> <a href="#">191</a> | 574.3266 | 1146.6386 | 1146.6431 | -3.85  | 0    | (36)  | 0.016    | 1    | K.GAILTTMLATR.N |
| <input checked="" type="checkbox"/> <a href="#">192</a> | 574.3272 | 1146.6398 | 1146.6431 | -2.81  | 0    | (42)  | 0.0034   | 1    | K.GAILTTMLATR.N |
| <input checked="" type="checkbox"/> <a href="#">193</a> | 574.3276 | 1146.6406 | 1146.6431 | -2.11  | 0    | (51)  | 0.00041  | 1    | K.GAILTTMLATR.N |
| <input checked="" type="checkbox"/> <a href="#">195</a> | 574.3278 | 1146.6410 | 1146.6431 | -1.76  | 0    | (47)  | 0.0012   | 1    | K.GAILTTMLATR.N |
| <input checked="" type="checkbox"/> <a href="#">197</a> | 574.3286 | 1146.6426 | 1146.6431 | -0.36  | 0    | (12)  | 3.8      | 1    | K.GAILTTMLATR.N |
| <input checked="" type="checkbox"/> <a href="#">198</a> | 574.3288 | 1146.6430 | 1146.6431 | -0.02  | 0    | (42)  | 0.0031   | 1    | K.GAILTTMLATR.N |
| <input checked="" type="checkbox"/> <a href="#">199</a> | 574.3290 | 1146.6434 | 1146.6431 | 0.33   | 0    | (54)  | 0.0002   | 1    | K.GAILTTMLATR.N |
| <input checked="" type="checkbox"/> <a href="#">200</a> | 574.3296 | 1146.6446 | 1146.6431 | 1.38   | 0    | 64    | 2.3e-005 | 1    | K.GAILTTMLATR.N |
| <input checked="" type="checkbox"/> <a href="#">201</a> | 574.3298 | 1146.6450 | 1146.6431 | 1.73   | 0    | (45)  | 0.0018   | 1    | K.GAILTTMLATR.N |
| <input checked="" type="checkbox"/> <a href="#">202</a> | 574.3300 | 1146.6454 | 1146.6431 | 2.08   | 0    | (64)  | 2.2e-005 | 1    | K.GAILTTMLATR.N |
| <input checked="" type="checkbox"/> <a href="#">203</a> | 574.3303 | 1146.6460 | 1146.6431 | 2.60   | 0    | (45)  | 0.0017   | 1    | K.GAILTTMLATR.N |
| <input checked="" type="checkbox"/> <a href="#">204</a> | 574.3303 | 1146.6460 | 1146.6431 | 2.60   | 0    | (25)  | 0.18     | 1    | K.GAILTTMLATR.N |
| <input checked="" type="checkbox"/> <a href="#">205</a> | 574.3306 | 1146.6466 | 1146.6431 | 3.12   | 0    | (39)  | 0.0056   | 1    | K.GAILTTMLATR.N |
| <input checked="" type="checkbox"/> <a href="#">207</a> | 574.3308 | 1146.6470 | 1146.6431 | 3.47   | 0    | (48)  | 0.00072  | 1    | K.GAILTTMLATR.N |
| <input checked="" type="checkbox"/> <a href="#">208</a> | 574.3308 | 1146.6470 | 1146.6431 | 3.47   | 0    | (50)  | 0.00047  | 1    | K.GAILTTMLATR.N |
| <input checked="" type="checkbox"/> <a href="#">209</a> | 574.3309 | 1146.6472 | 1146.6431 | 3.65   | 0    | (42)  | 0.0033   | 1    | K.GAILTTMLATR.N |
| <input checked="" type="checkbox"/> <a href="#">212</a> | 574.3314 | 1146.6482 | 1146.6431 | 4.52   | 0    | (35)  | 0.014    | 1    | K.GAILTTMLATR.N |
| <input checked="" type="checkbox"/> <a href="#">213</a> | 574.3317 | 1146.6488 | 1146.6431 | 5.04   | 0    | (31)  | 0.035    | 1    | K.GAILTTMLATR.N |
| <input checked="" type="checkbox"/> <a href="#">214</a> | 574.3324 | 1146.6502 | 1146.6431 | 6.26   | 0    | (26)  | 0.12     | 1    | K.GAILTTMLATR.N |
| <input checked="" type="checkbox"/> <a href="#">242</a> | 631.2996 | 1260.5846 | 1260.5927 | -6.42  | 0    | (46)  | 0.0014   | 1    | R.FYFENLWSR.N   |
| <input checked="" type="checkbox"/> <a href="#">243</a> | 631.3040 | 1260.5934 | 1260.5927 | 0.56   | 0    | (48)  | 0.001    | 1    | R.FYFENLWSR.N   |
| <input checked="" type="checkbox"/> <a href="#">244</a> | 631.3043 | 1260.5940 | 1260.5927 | 1.04   | 0    | 57    | 0.00013  | 1    | R.FYFENLWSR.N   |

|                                     |                     |           |           |           |        |   |      |          |   |                         |
|-------------------------------------|---------------------|-----------|-----------|-----------|--------|---|------|----------|---|-------------------------|
| <input checked="" type="checkbox"/> | <a href="#">246</a> | 631.3052  | 1260.5958 | 1260.5927 | 2.46   | 0 | (23) | 0.31     | 1 | R.FYFENLWSR.N           |
| <input checked="" type="checkbox"/> | <a href="#">247</a> | 631.3057  | 1260.5968 | 1260.5927 | 3.26   | 0 | (42) | 0.0042   | 1 | R.FYFENLWSR.N           |
| <input checked="" type="checkbox"/> | <a href="#">248</a> | 631.3059  | 1260.5972 | 1260.5927 | 3.57   | 0 | (48) | 0.001    | 1 | R.FYFENLWSR.N           |
| <input checked="" type="checkbox"/> | <a href="#">249</a> | 631.3065  | 1260.5984 | 1260.5927 | 4.53   | 0 | (4)  | 31       | 1 | R.FYFENLWSR.N           |
| <input checked="" type="checkbox"/> | <a href="#">250</a> | 631.3067  | 1260.5988 | 1260.5927 | 4.84   | 0 | (44) | 0.0027   | 1 | R.FYFENLWSR.N           |
| <input checked="" type="checkbox"/> | <a href="#">273</a> | 652.3435  | 1302.6724 | 1302.6932 | -15.92 | 0 | (8)  | 12       | 1 | R.ITQYLDAGGIPR.T        |
| <input checked="" type="checkbox"/> | <a href="#">274</a> | 652.3566  | 1302.6986 | 1302.6932 | 4.19   | 0 | (53) | 0.00039  | 1 | R.ITQYLDAGGIPR.T        |
| <input checked="" type="checkbox"/> | <a href="#">275</a> | 652.3569  | 1302.6992 | 1302.6932 | 4.65   | 0 | (39) | 0.0089   | 1 | R.ITQYLDAGGIPR.T        |
| <input checked="" type="checkbox"/> | <a href="#">276</a> | 652.3579  | 1302.7012 | 1302.6932 | 6.18   | 0 | 59   | 8e-005   | 1 | R.ITQYLDAGGIPR.T        |
| <input checked="" type="checkbox"/> | <a href="#">277</a> | 652.3600  | 1302.7054 | 1302.6932 | 9.41   | 0 | (55) | 0.0002   | 1 | R.ITQYLDAGGIPR.T        |
| <input checked="" type="checkbox"/> | <a href="#">297</a> | 670.8989  | 1339.7832 | 1339.7711 | 9.09   | 0 | 2    | 19       | 6 | R.DLKPENLLASK.L         |
| <input checked="" type="checkbox"/> | <a href="#">491</a> | 816.8908  | 1631.7670 | 1631.7719 | -2.96  | 0 | (36) | 0.014    | 1 | R.FTEEYQLFEELGK.G       |
| <input checked="" type="checkbox"/> | <a href="#">492</a> | 816.8912  | 1631.7678 | 1631.7719 | -2.47  | 0 | (47) | 0.0011   | 1 | R.FTEEYQLFEELGK.G       |
| <input checked="" type="checkbox"/> | <a href="#">494</a> | 816.8917  | 1631.7688 | 1631.7719 | -1.86  | 0 | (52) | 0.00042  | 1 | R.FTEEYQLFEELGK.G       |
| <input checked="" type="checkbox"/> | <a href="#">495</a> | 816.8923  | 1631.7700 | 1631.7719 | -1.12  | 0 | (31) | 0.046    | 1 | R.FTEEYQLFEELGK.G       |
| <input checked="" type="checkbox"/> | <a href="#">496</a> | 816.8926  | 1631.7706 | 1631.7719 | -0.76  | 0 | (44) | 0.0028   | 1 | R.FTEEYQLFEELGK.G       |
| <input checked="" type="checkbox"/> | <a href="#">497</a> | 816.8933  | 1631.7720 | 1631.7719 | 0.10   | 0 | (54) | 0.00023  | 1 | R.FTEEYQLFEELGK.G       |
| <input checked="" type="checkbox"/> | <a href="#">498</a> | 816.8933  | 1631.7720 | 1631.7719 | 0.10   | 0 | (37) | 0.011    | 1 | R.FTEEYQLFEELGK.G       |
| <input checked="" type="checkbox"/> | <a href="#">499</a> | 816.8934  | 1631.7722 | 1631.7719 | 0.22   | 0 | (54) | 0.00027  | 1 | R.FTEEYQLFEELGK.G       |
| <input checked="" type="checkbox"/> | <a href="#">500</a> | 816.8934  | 1631.7722 | 1631.7719 | 0.22   | 0 | (27) | 0.13     | 1 | R.FTEEYQLFEELGK.G       |
| <input checked="" type="checkbox"/> | <a href="#">502</a> | 816.8936  | 1631.7726 | 1631.7719 | 0.47   | 0 | (70) | 5.6e-006 | 1 | R.FTEEYQLFEELGK.G       |
| <input checked="" type="checkbox"/> | <a href="#">503</a> | 816.8936  | 1631.7726 | 1631.7719 | 0.47   | 0 | (55) | 0.00021  | 1 | R.FTEEYQLFEELGK.G       |
| <input checked="" type="checkbox"/> | <a href="#">504</a> | 816.8936  | 1631.7726 | 1631.7719 | 0.47   | 0 | (27) | 0.12     | 1 | R.FTEEYQLFEELGK.G       |
| <input checked="" type="checkbox"/> | <a href="#">505</a> | 816.8938  | 1631.7730 | 1631.7719 | 0.72   | 0 | (73) | 2.8e-006 | 1 | R.FTEEYQLFEELGK.G       |
| <input checked="" type="checkbox"/> | <a href="#">506</a> | 816.8939  | 1631.7732 | 1631.7719 | 0.84   | 0 | 74   | 2.8e-006 | 1 | R.FTEEYQLFEELGK.G       |
| <input checked="" type="checkbox"/> | <a href="#">507</a> | 816.8943  | 1631.7740 | 1631.7719 | 1.33   | 0 | (59) | 8.2e-005 | 1 | R.FTEEYQLFEELGK.G       |
| <input checked="" type="checkbox"/> | <a href="#">509</a> | 816.8944  | 1631.7742 | 1631.7719 | 1.45   | 0 | (54) | 0.00027  | 1 | R.FTEEYQLFEELGK.G       |
| <input checked="" type="checkbox"/> | <a href="#">510</a> | 816.8944  | 1631.7742 | 1631.7719 | 1.45   | 0 | (56) | 0.00014  | 1 | R.FTEEYQLFEELGK.G       |
| <input checked="" type="checkbox"/> | <a href="#">511</a> | 816.8944  | 1631.7742 | 1631.7719 | 1.45   | 0 | (63) | 3.2e-005 | 1 | R.FTEEYQLFEELGK.G       |
| <input checked="" type="checkbox"/> | <a href="#">512</a> | 816.8945  | 1631.7744 | 1631.7719 | 1.57   | 0 | (62) | 4.3e-005 | 1 | R.FTEEYQLFEELGK.G       |
| <input checked="" type="checkbox"/> | <a href="#">513</a> | 816.8946  | 1631.7746 | 1631.7719 | 1.70   | 0 | (63) | 3.1e-005 | 1 | R.FTEEYQLFEELGK.G       |
| <input checked="" type="checkbox"/> | <a href="#">515</a> | 816.8948  | 1631.7750 | 1631.7719 | 1.94   | 0 | (51) | 0.00047  | 1 | R.FTEEYQLFEELGK.G       |
| <input checked="" type="checkbox"/> | <a href="#">516</a> | 816.8951  | 1631.7756 | 1631.7719 | 2.31   | 0 | (48) | 0.00096  | 1 | R.FTEEYQLFEELGK.G       |
| <input checked="" type="checkbox"/> | <a href="#">517</a> | 816.8954  | 1631.7762 | 1631.7719 | 2.68   | 0 | (71) | 5.3e-006 | 1 | R.FTEEYQLFEELGK.G       |
| <input checked="" type="checkbox"/> | <a href="#">518</a> | 816.8955  | 1631.7764 | 1631.7719 | 2.80   | 0 | (37) | 0.014    | 1 | R.FTEEYQLFEELGK.G       |
| <input checked="" type="checkbox"/> | <a href="#">519</a> | 816.8956  | 1631.7766 | 1631.7719 | 2.92   | 0 | (9)  | 8        | 1 | R.FTEEYQLFEELGK.G       |
| <input checked="" type="checkbox"/> | <a href="#">520</a> | 816.8956  | 1631.7766 | 1631.7719 | 2.92   | 0 | (22) | 0.43     | 1 | R.FTEEYQLFEELGK.G       |
| <input checked="" type="checkbox"/> | <a href="#">523</a> | 816.8964  | 1631.7782 | 1631.7719 | 3.90   | 0 | (20) | 0.61     | 1 | R.FTEEYQLFEELGK.G       |
| <input checked="" type="checkbox"/> | <a href="#">524</a> | 816.8965  | 1631.7784 | 1631.7719 | 4.02   | 0 | (48) | 0.00099  | 1 | R.FTEEYQLFEELGK.G       |
| <input checked="" type="checkbox"/> | <a href="#">525</a> | 816.8968  | 1631.7790 | 1631.7719 | 4.39   | 0 | (50) | 0.00064  | 1 | R.FTEEYQLFEELGK.G       |
| <input checked="" type="checkbox"/> | <a href="#">526</a> | 816.8972  | 1631.7798 | 1631.7719 | 4.88   | 0 | (3)  | 35       | 1 | R.FTEEYQLFEELGK.G       |
| <input checked="" type="checkbox"/> | <a href="#">527</a> | 816.8974  | 1631.7802 | 1631.7719 | 5.13   | 0 | (57) | 0.00014  | 1 | R.FTEEYQLFEELGK.G       |
| <input checked="" type="checkbox"/> | <a href="#">528</a> | 816.8977  | 1631.7808 | 1631.7719 | 5.50   | 0 | (2)  | 44       | 1 | R.FTEEYQLFEELGK.G       |
| <input checked="" type="checkbox"/> | <a href="#">529</a> | 816.8980  | 1631.7814 | 1631.7719 | 5.86   | 0 | (41) | 0.005    | 1 | R.FTEEYQLFEELGK.G       |
| <input checked="" type="checkbox"/> | <a href="#">530</a> | 816.8983  | 1631.7820 | 1631.7719 | 6.23   | 0 | (20) | 0.63     | 1 | R.FTEEYQLFEELGK.G       |
| <input checked="" type="checkbox"/> | <a href="#">531</a> | 816.8991  | 1631.7836 | 1631.7719 | 7.21   | 0 | (63) | 3.1e-005 | 1 | R.FTEEYQLFEELGK.G       |
| <input checked="" type="checkbox"/> | <a href="#">532</a> | 816.8991  | 1631.7836 | 1631.7719 | 7.21   | 0 | (1)  | 57       | 4 | R.FTEEYQLFEELGK.G       |
| <input checked="" type="checkbox"/> | <a href="#">533</a> | 816.8996  | 1631.7846 | 1631.7719 | 7.82   | 0 | (52) | 0.00037  | 1 | R.FTEEYQLFEELGK.G       |
| <input checked="" type="checkbox"/> | <a href="#">534</a> | 816.9014  | 1631.7882 | 1631.7719 | 10.0   | 0 | (41) | 0.0058   | 1 | R.FTEEYQLFEELGK.G       |
| <input checked="" type="checkbox"/> | <a href="#">535</a> | 816.9016  | 1631.7886 | 1631.7719 | 10.3   | 0 | (38) | 0.011    | 1 | R.FTEEYQLFEELGK.G       |
| <input checked="" type="checkbox"/> | <a href="#">598</a> | 1040.9820 | 2079.9494 | 2079.9426 | 3.32   | 0 | 32   | 0.027    | 1 | K.AGAYDFPSPWDVTPEAK.D   |
| <input checked="" type="checkbox"/> | <a href="#">599</a> | 1040.9830 | 2079.9514 | 2079.9426 | 4.28   | 0 | (9)  | 6        | 1 | K.AGAYDFPSPWDVTPEAK.D   |
| <input checked="" type="checkbox"/> | <a href="#">602</a> | 1040.9895 | 2079.9644 | 2079.9426 | 10.5   | 0 | (17) | 1.1      | 1 | K.AGAYDFPSPWDVTPEAK.D   |
| <input checked="" type="checkbox"/> | <a href="#">623</a> | 715.3424  | 2143.0054 | 2143.0321 | -12.46 | 0 | (14) | 1.7      | 1 | K.VTEQLIEAISNGDFESYTK.M |
| <input checked="" type="checkbox"/> | <a href="#">625</a> | 715.3448  | 2143.0126 | 2143.0321 | -9.10  | 0 | (43) | 0.0023   | 1 | K.VTEQLIEAISNGDFESYTK.M |
| <input checked="" type="checkbox"/> | <a href="#">626</a> | 715.3478  | 2143.0216 | 2143.0321 | -4.90  | 0 | 63   | 2.4e-005 | 1 | K.VTEQLIEAISNGDFESYTK.M |
| <input checked="" type="checkbox"/> | <a href="#">629</a> | 1072.5308 | 2143.0470 | 2143.0321 | 6.99   | 0 | (22) | 0.35     | 1 | K.VTEQLIEAISNGDFESYTK.M |

## Proteins matching the same set of peptides:

[IPI00621806](#) Mass: 54651 Score: 1043 Queries matched: 83

Tax\_id=10090 Gene\_Symbol=Camk2a Isoform Alpha CaMKII of Calcium/calmodulin-dependent protein kinase type II subunit alpha

2. [IPI00875723](#) Mass: 68686 Score: 313 Queries matched: 44 emPAI: 0.32

Tax\_id=10090 Gene\_Symbol=Camk2b 68 kDa protein

Check to include this hit in error tolerant search or archive report

| Query               | Observed | Mr(expt)  | Mr(calc)  | ppm    | Miss | Score | Expect   | Rank | Peptide         |
|---------------------|----------|-----------|-----------|--------|------|-------|----------|------|-----------------|
| <a href="#">105</a> | 463.2481 | 924.4816  | 924.4777  | 4.26   | 1    | 2     | 39       | 1    | R.DHOKLER.E     |
| <a href="#">183</a> | 574.3185 | 1146.6224 | 1146.6431 | -17.98 | 0    | (0)   | 75       | 3    | K.GAILTTMLATR.N |
| <a href="#">184</a> | 574.3212 | 1146.6278 | 1146.6431 | -13.27 | 0    | (39)  | 0.0084   | 1    | K.GAILTTMLATR.N |
| <a href="#">190</a> | 574.3264 | 1146.6382 | 1146.6431 | -4.20  | 0    | (35)  | 0.022    | 1    | K.GAILTTMLATR.N |
| <a href="#">191</a> | 574.3266 | 1146.6386 | 1146.6431 | -3.85  | 0    | (36)  | 0.016    | 1    | K.GAILTTMLATR.N |
| <a href="#">192</a> | 574.3272 | 1146.6398 | 1146.6431 | -2.81  | 0    | (42)  | 0.0034   | 1    | K.GAILTTMLATR.N |
| <a href="#">193</a> | 574.3276 | 1146.6406 | 1146.6431 | -2.11  | 0    | (51)  | 0.00041  | 1    | K.GAILTTMLATR.N |
| <a href="#">195</a> | 574.3278 | 1146.6410 | 1146.6431 | -1.76  | 0    | (47)  | 0.0012   | 1    | K.GAILTTMLATR.N |
| <a href="#">197</a> | 574.3286 | 1146.6426 | 1146.6431 | -0.36  | 0    | (12)  | 3.8      | 1    | K.GAILTTMLATR.N |
| <a href="#">198</a> | 574.3288 | 1146.6430 | 1146.6431 | -0.02  | 0    | (42)  | 0.0031   | 1    | K.GAILTTMLATR.N |
| <a href="#">199</a> | 574.3290 | 1146.6434 | 1146.6431 | 0.33   | 0    | (54)  | 0.0002   | 1    | K.GAILTTMLATR.N |
| <a href="#">200</a> | 574.3296 | 1146.6446 | 1146.6431 | 1.38   | 0    | 64    | 2.3e-005 | 1    | K.GAILTTMLATR.N |
| <a href="#">201</a> | 574.3298 | 1146.6450 | 1146.6431 | 1.73   | 0    | (45)  | 0.0018   | 1    | K.GAILTTMLATR.N |
| <a href="#">202</a> | 574.3300 | 1146.6454 | 1146.6431 | 2.08   | 0    | (64)  | 2.2e-005 | 1    | K.GAILTTMLATR.N |
| <a href="#">203</a> | 574.3303 | 1146.6460 | 1146.6431 | 2.60   | 0    | (45)  | 0.0017   | 1    | K.GAILTTMLATR.N |
| <a href="#">204</a> | 574.3303 | 1146.6460 | 1146.6431 | 2.60   | 0    | (25)  | 0.18     | 1    | K.GAILTTMLATR.N |

|                                                         |                  |                  |                  |               |          |             |                 |           |                                             |
|---------------------------------------------------------|------------------|------------------|------------------|---------------|----------|-------------|-----------------|-----------|---------------------------------------------|
| <a href="#">205</a>                                     | 574.3306         | 1146.6466        | 1146.6431        | 3.12          | 0        | (39)        | 0.0056          | 1         | K.GAILTTMLATR.N                             |
| <a href="#">207</a>                                     | 574.3308         | 1146.6470        | 1146.6431        | 3.47          | 0        | (48)        | 0.00072         | 1         | K.GAILTTMLATR.N                             |
| <a href="#">208</a>                                     | 574.3308         | 1146.6470        | 1146.6431        | 3.47          | 0        | (50)        | 0.00047         | 1         | K.GAILTTMLATR.N                             |
| <a href="#">209</a>                                     | 574.3309         | 1146.6472        | 1146.6431        | 3.65          | 0        | (42)        | 0.0033          | 1         | K.GAILTTMLATR.N                             |
| <a href="#">212</a>                                     | 574.3314         | 1146.6482        | 1146.6431        | 4.52          | 0        | (35)        | 0.014           | 1         | K.GAILTTMLATR.N                             |
| <a href="#">213</a>                                     | 574.3317         | 1146.6488        | 1146.6431        | 5.04          | 0        | (31)        | 0.035           | 1         | K.GAILTTMLATR.N                             |
| <a href="#">214</a>                                     | 574.3324         | 1146.6502        | 1146.6431        | 6.26          | 0        | (26)        | 0.12            | 1         | K.GAILTTMLATR.N                             |
| <input checked="" type="checkbox"/> <a href="#">217</a> | <b>579.2984</b>  | <b>1156.5822</b> | <b>1156.6313</b> | <b>-42.37</b> | <b>1</b> | <b>14</b>   | <b>3.3</b>      | <b>1</b>  | <b>R.VAAVPASGSR.R</b>                       |
| <a href="#">297</a>                                     | 670.8989         | 1339.7832        | 1339.7711        | 9.09          | 0        | 2           | 19              | 6         | R.DLKPENLLASK.C                             |
| <input checked="" type="checkbox"/> <a href="#">309</a> | <b>458.5792</b>  | <b>1372.7158</b> | <b>1372.7310</b> | <b>-11.12</b> | <b>1</b> | <b>38</b>   | <b>0.011</b>    | <b>1</b>  | <b>K.KADGVKPTNSTK.N</b>                     |
| <input checked="" type="checkbox"/> <a href="#">310</a> | <b>458.5814</b>  | <b>1372.7224</b> | <b>1372.7310</b> | <b>-6.31</b>  | <b>1</b> | <b>(25)</b> | <b>0.25</b>     | <b>1</b>  | <b>K.KADGVKPTNSTK.N</b>                     |
| <input checked="" type="checkbox"/> <a href="#">481</a> | <b>810.8718</b>  | <b>1619.7290</b> | <b>1619.7355</b> | <b>-3.99</b>  | <b>0</b> | <b>(18)</b> | <b>0.69</b>     | <b>1</b>  | <b>R.FTDEYQLYEDIGK.G</b>                    |
| <input checked="" type="checkbox"/> <a href="#">482</a> | <b>810.8729</b>  | <b>1619.7312</b> | <b>1619.7355</b> | <b>-2.63</b>  | <b>0</b> | <b>(41)</b> | <b>0.0039</b>   | <b>1</b>  | <b>R.FTDEYQLYEDIGK.G</b>                    |
| <input checked="" type="checkbox"/> <a href="#">483</a> | <b>810.8740</b>  | <b>1619.7334</b> | <b>1619.7355</b> | <b>-1.27</b>  | <b>0</b> | <b>52</b>   | <b>0.00033</b>  | <b>1</b>  | <b>R.FTDEYQLYEDIGK.G</b>                    |
| <input checked="" type="checkbox"/> <a href="#">485</a> | <b>810.8782</b>  | <b>1619.7418</b> | <b>1619.7355</b> | <b>3.92</b>   | <b>0</b> | <b>(3)</b>  | <b>24</b>       | <b>1</b>  | <b>R.FTDEYQLYEDIGK.G</b>                    |
| <input checked="" type="checkbox"/> <a href="#">487</a> | <b>810.8815</b>  | <b>1619.7484</b> | <b>1619.7355</b> | <b>7.99</b>   | <b>0</b> | <b>(7)</b>  | <b>10</b>       | <b>1</b>  | <b>R.FTDEYQLYEDIGK.G</b>                    |
| <a href="#">571</a>                                     | <b>897.9096</b>  | <b>1793.8046</b> | <b>1793.8652</b> | <b>-33.75</b> | <b>0</b> | <b>0</b>    | <b>42</b>       | <b>10</b> | <b>R.TPSPATAMATTVTCTR.F + Oxidation (M)</b> |
| <a href="#">598</a>                                     | 1040.9820        | 2079.9494        | 2079.9426        | 3.32          | 0        | 32          | 0.027           | 1         | K.AGAYDFPSPWDVTPEAK.N                       |
| <a href="#">599</a>                                     | 1040.9830        | 2079.9514        | 2079.9426        | 4.28          | 0        | (9)         | 6               | 1         | K.AGAYDFPSPWDVTPEAK.N                       |
| <a href="#">602</a>                                     | 1040.9895        | 2079.9644        | 2079.9426        | 10.5          | 0        | (17)        | 1.1             | 1         | K.AGAYDFPSPWDVTPEAK.N                       |
| <input checked="" type="checkbox"/> <a href="#">604</a> | <b>704.9893</b>  | <b>2111.9461</b> | <b>2112.0011</b> | <b>-26.05</b> | <b>0</b> | <b>(14)</b> | <b>1.4</b>      | <b>1</b>  | <b>K.TTEQLIEAVNNGDFEAYAK.I</b>              |
| <input checked="" type="checkbox"/> <a href="#">607</a> | <b>705.0047</b>  | <b>2111.9923</b> | <b>2112.0011</b> | <b>-4.18</b>  | <b>0</b> | <b>29</b>   | <b>0.061</b>    | <b>1</b>  | <b>K.TTEQLIEAVNNGDFEAYAK.I</b>              |
| <a href="#">609</a>                                     | 1057.0087        | 2112.0028        | 2112.0011        | 0.83          | 0        | (3)         | 22              | 3         | K.TTEQLIEAVNNGDFEAYAK.I                     |
| <input checked="" type="checkbox"/> <a href="#">674</a> | <b>785.0440</b>  | <b>2352.1102</b> | <b>2352.1301</b> | <b>-8.48</b>  | <b>0</b> | <b>(66)</b> | <b>9.2e-006</b> | <b>1</b>  | <b>R.QTTAPATMSTAASGTTMGLVEQAK.S</b>         |
| <input checked="" type="checkbox"/> <a href="#">675</a> | <b>785.0443</b>  | <b>2352.1111</b> | <b>2352.1301</b> | <b>-8.09</b>  | <b>0</b> | <b>85</b>   | <b>1.4e-007</b> | <b>1</b>  | <b>R.QTTAPATMSTAASGTTMGLVEQAK.S</b>         |
| <input checked="" type="checkbox"/> <a href="#">677</a> | <b>1177.0797</b> | <b>2352.1448</b> | <b>2352.1301</b> | <b>6.26</b>   | <b>0</b> | <b>(30)</b> | <b>0.045</b>    | <b>1</b>  | <b>R.QTTAPATMSTAASGTTMGLVEQAK.S</b>         |
| <input checked="" type="checkbox"/> <a href="#">678</a> | <b>1177.0834</b> | <b>2352.1522</b> | <b>2352.1301</b> | <b>9.41</b>   | <b>0</b> | <b>(45)</b> | <b>0.0013</b>   | <b>1</b>  | <b>R.QTTAPATMSTAASGTTMGLVEQAK.S</b>         |
| <a href="#">680</a>                                     | 1177.0856        | 2352.1566        | 2352.1301        | 11.3          | 0        | (2)         | 28              | 3         | R.QTTAPATMSTAASGTTMGLVEQAK.S                |

3. [IPI00112584](#) Mass: 56961 Score: 198 Queries matched: 30 emPAI: 0.12  
 Tax\_Id=10090 Gene\_Symbol=Camk2d Isoform 1 of Calcium/calmodulin-dependent protein kinase type II subunit delta  
 Check to include this hit in error tolerant search or archive report

| Query                                                   | Observed        | Mr(expt)         | Mr(calc)         | ppm          | Miss     | Score       | Expect        | Rank     | Peptide                  |
|---------------------------------------------------------|-----------------|------------------|------------------|--------------|----------|-------------|---------------|----------|--------------------------|
| <a href="#">105</a>                                     | 463.2481        | 924.4816         | 924.4777         | 4.26         | 1        | 2           | 39            | 1        | R.DHQKLER.E              |
| <a href="#">183</a>                                     | 574.3185        | 1146.6224        | 1146.6431        | -17.98       | 0        | (0)         | 75            | 3        | K.GAILTTMLATR.N          |
| <a href="#">184</a>                                     | 574.3212        | 1146.6278        | 1146.6431        | -13.27       | 0        | (39)        | 0.0084        | 1        | K.GAILTTMLATR.N          |
| <a href="#">190</a>                                     | 574.3264        | 1146.6382        | 1146.6431        | -4.20        | 0        | (35)        | 0.022         | 1        | K.GAILTTMLATR.N          |
| <a href="#">191</a>                                     | 574.3266        | 1146.6386        | 1146.6431        | -3.85        | 0        | (36)        | 0.016         | 1        | K.GAILTTMLATR.N          |
| <a href="#">192</a>                                     | 574.3272        | 1146.6398        | 1146.6431        | -2.81        | 0        | (42)        | 0.0034        | 1        | K.GAILTTMLATR.N          |
| <a href="#">193</a>                                     | 574.3276        | 1146.6406        | 1146.6431        | -2.11        | 0        | (51)        | 0.00041       | 1        | K.GAILTTMLATR.N          |
| <a href="#">195</a>                                     | 574.3278        | 1146.6410        | 1146.6431        | -1.76        | 0        | (47)        | 0.0012        | 1        | K.GAILTTMLATR.N          |
| <a href="#">197</a>                                     | 574.3286        | 1146.6426        | 1146.6431        | -0.36        | 0        | (12)        | 3.8           | 1        | K.GAILTTMLATR.N          |
| <a href="#">198</a>                                     | 574.3288        | 1146.6430        | 1146.6431        | -0.02        | 0        | (42)        | 0.0031        | 1        | K.GAILTTMLATR.N          |
| <a href="#">199</a>                                     | 574.3290        | 1146.6434        | 1146.6431        | 0.33         | 0        | (54)        | 0.0002        | 1        | K.GAILTTMLATR.N          |
| <a href="#">200</a>                                     | 574.3296        | 1146.6446        | 1146.6431        | 1.38         | 0        | 64          | 2.3e-005      | 1        | K.GAILTTMLATR.N          |
| <a href="#">201</a>                                     | 574.3298        | 1146.6450        | 1146.6431        | 1.73         | 0        | (45)        | 0.0018        | 1        | K.GAILTTMLATR.N          |
| <a href="#">202</a>                                     | 574.3300        | 1146.6454        | 1146.6431        | 2.08         | 0        | (64)        | 2.2e-005      | 1        | K.GAILTTMLATR.N          |
| <a href="#">203</a>                                     | 574.3303        | 1146.6460        | 1146.6431        | 2.60         | 0        | (45)        | 0.0017        | 1        | K.GAILTTMLATR.N          |
| <a href="#">204</a>                                     | 574.3303        | 1146.6460        | 1146.6431        | 2.60         | 0        | (25)        | 0.18          | 1        | K.GAILTTMLATR.N          |
| <a href="#">205</a>                                     | 574.3306        | 1146.6466        | 1146.6431        | 3.12         | 0        | (39)        | 0.0056        | 1        | K.GAILTTMLATR.N          |
| <a href="#">207</a>                                     | 574.3308        | 1146.6470        | 1146.6431        | 3.47         | 0        | (48)        | 0.00072       | 1        | K.GAILTTMLATR.N          |
| <a href="#">208</a>                                     | 574.3308        | 1146.6470        | 1146.6431        | 3.47         | 0        | (50)        | 0.00047       | 1        | K.GAILTTMLATR.N          |
| <a href="#">209</a>                                     | 574.3309        | 1146.6472        | 1146.6431        | 3.65         | 0        | (42)        | 0.0033        | 1        | K.GAILTTMLATR.N          |
| <a href="#">212</a>                                     | 574.3314        | 1146.6482        | 1146.6431        | 4.52         | 0        | (35)        | 0.014         | 1        | K.GAILTTMLATR.N          |
| <a href="#">213</a>                                     | 574.3317        | 1146.6488        | 1146.6431        | 5.04         | 0        | (31)        | 0.035         | 1        | K.GAILTTMLATR.N          |
| <a href="#">214</a>                                     | 574.3324        | 1146.6502        | 1146.6431        | 6.26         | 0        | (26)        | 0.12          | 1        | K.GAILTTMLATR.N          |
| <a href="#">297</a>                                     | 670.8989        | 1339.7832        | 1339.7711        | 9.09         | 0        | 2           | 19            | 6        | R.DLKPENLLASK.S          |
| <input checked="" type="checkbox"/> <a href="#">472</a> | <b>809.8823</b> | <b>1617.7500</b> | <b>1617.7562</b> | <b>-3.83</b> | <b>0</b> | <b>(2)</b>  | <b>34</b>     | <b>1</b> | <b>R.FTDEYQLFEELGK.G</b> |
| <input checked="" type="checkbox"/> <a href="#">473</a> | <b>809.8842</b> | <b>1617.7538</b> | <b>1617.7562</b> | <b>-1.48</b> | <b>0</b> | <b>37</b>   | <b>0.0098</b> | <b>1</b> | <b>R.FTDEYQLFEELGK.G</b> |
| <input checked="" type="checkbox"/> <a href="#">475</a> | <b>809.8906</b> | <b>1617.7666</b> | <b>1617.7562</b> | <b>6.43</b>  | <b>0</b> | <b>(35)</b> | <b>0.021</b>  | <b>1</b> | <b>R.FTDEYQLFEELGK.G</b> |
| <a href="#">598</a>                                     | 1040.9820       | 2079.9494        | 2079.9426        | 3.32         | 0        | 32          | 0.027         | 1        | K.AGAYDFPSPWDVTPEAK.D    |
| <a href="#">599</a>                                     | 1040.9830       | 2079.9514        | 2079.9426        | 4.28         | 0        | (9)         | 6             | 1        | K.AGAYDFPSPWDVTPEAK.D    |
| <a href="#">602</a>                                     | 1040.9895       | 2079.9644        | 2079.9426        | 10.5         | 0        | (17)        | 1.1           | 1        | K.AGAYDFPSPWDVTPEAK.D    |

Proteins matching the same set of peptides:

[IPI00406790](#) Mass: 60593 Score: 198 Queries matched: 30  
 Tax\_Id=10090 Gene\_Symbol=Camk2d Isoform 4 of Calcium/calmodulin-dependent protein kinase type II subunit delta  
[IPI00475044](#) Mass: 55899 Score: 198 Queries matched: 30  
 Tax\_Id=10090 Gene\_Symbol=Camk2d Isoform 2 of Calcium/calmodulin-dependent protein kinase type II subunit delta  
[IPI00828919](#) Mass: 58492 Score: 198 Queries matched: 30  
 Tax\_Id=10090 Gene\_Symbol=Camk2d Isoform 3 of Calcium/calmodulin-dependent protein kinase type II subunit delta  
[IPI00857865](#) Mass: 54664 Score: 198 Queries matched: 30  
 Tax\_Id=10090 Gene\_Symbol=Camk2d Putative uncharacterized protein  
[IPI00858128](#) Mass: 58283 Score: 198 Queries matched: 30  
 Tax\_Id=10090 Gene\_Symbol=Camk2d calcium/calmodulin-dependent protein kinase type II subunit delta isoform 1  
[IPI00858144](#) Mass: 55828 Score: 198 Queries matched: 30  
 Tax\_Id=10090 Gene\_Symbol=Camk2d 55 kDa protein

4. [IPI00608020](#) Mass: 20817 Score: 71 Queries matched: 5 emPAI: 0.16  
 Tax\_Id=10090 Gene\_Symbol=Ft11 ferritin light chain 1  
 Check to include this hit in error tolerant search or archive report

| Query                                                   | Observed        | Mr(expt)         | Mr(calc)         | ppm         | Miss     | Score      | Expect     | Rank     | Peptide             |
|---------------------------------------------------------|-----------------|------------------|------------------|-------------|----------|------------|------------|----------|---------------------|
| <input checked="" type="checkbox"/> <a href="#">133</a> | <b>517.7672</b> | <b>1033.5198</b> | <b>1033.5192</b> | <b>0.59</b> | <b>0</b> | <b>(6)</b> | <b>24</b>  | <b>1</b> | <b>R.LLEFQNDR.G</b> |
| <input checked="" type="checkbox"/> <a href="#">134</a> | <b>517.7681</b> | <b>1033.5216</b> | <b>1033.5192</b> | <b>2.33</b> | <b>0</b> | <b>17</b>  | <b>2.1</b> | <b>1</b> | <b>R.LLEFQNDR.G</b> |

|                                     |                     |          |           |           |       |   |      |         |   |                              |
|-------------------------------------|---------------------|----------|-----------|-----------|-------|---|------|---------|---|------------------------------|
| <input checked="" type="checkbox"/> | <a href="#">135</a> | 517.7722 | 1033.5298 | 1033.5192 | 10.3  | 0 | (9)  | 11      | 1 | R.LLEFQNDR.G                 |
| <input checked="" type="checkbox"/> | <a href="#">682</a> | 791.7310 | 2372.1712 | 2372.1761 | -2.07 | 0 | (40) | 0.0043  | 1 | R.VAGPQPAQTGAPQGSGLGEYLFER.L |
| <input checked="" type="checkbox"/> | <a href="#">683</a> | 791.7352 | 2372.1838 | 2372.1761 | 3.25  | 0 | 54   | 0.00015 | 1 | R.VAGPQPAQTGAPQGSGLGEYLFER.L |

## Proteins matching the same set of peptides:

[IPI00625129](#) Mass: 20783 Score: 71 Queries matched: 5  
Tax\_Id=10090 Gene\_Symbol=Ftl2 ferritin light chain 2  
[IPI00762203](#) Mass: 20847 Score: 71 Queries matched: 5  
Tax\_Id=10090 Gene\_Symbol=Ftl1 Ferritin light chain 1

5. [IPI00347110](#) Mass: 59502 Score: 69 Queries matched: 4 emPAI: 0.11  
Tax\_Id=10090 Gene\_Symbol=Krt73 Keratin, type II cytoskeletal 73

Check to include this hit in error tolerant search or archive report

| Query                               | Observed            | Mr(expt) | Mr(calc)  | ppm       | Miss  | Score | Expect | Rank   | Peptide |                  |
|-------------------------------------|---------------------|----------|-----------|-----------|-------|-------|--------|--------|---------|------------------|
| <input checked="" type="checkbox"/> | <a href="#">263</a> | 639.3532 | 1276.6918 | 1276.7027 | -8.47 | 0     | (33)   | 0.036  | 1       | K.LALDIEIATYR.K  |
| <input checked="" type="checkbox"/> | <a href="#">264</a> | 639.3586 | 1276.7026 | 1276.7027 | -0.01 | 0     | 40     | 0.0068 | 1       | K.LALDIEIATYR.K  |
| <input checked="" type="checkbox"/> | <a href="#">354</a> | 738.3995 | 1474.7844 | 1474.7780 | 4.38  | 0     | (22)   | 0.4    | 1       | R.FLEQQNQVLQTK.W |
| <input checked="" type="checkbox"/> | <a href="#">355</a> | 738.4022 | 1474.7898 | 1474.7780 | 8.04  | 0     | 55     | 0.0002 | 1       | R.FLEQQNQVLQTK.W |

6. [IPI00625729](#) Mass: 66079 Score: 55 Queries matched: 3 emPAI: 0.05  
Tax\_Id=10090 Gene\_Symbol=Krt1 Keratin, type II cytoskeletal 1

Check to include this hit in error tolerant search or archive report

| Query                               | Observed            | Mr(expt) | Mr(calc)  | ppm       | Miss | Score | Expect | Rank   | Peptide |                  |
|-------------------------------------|---------------------|----------|-----------|-----------|------|-------|--------|--------|---------|------------------|
| <input checked="" type="checkbox"/> | <a href="#">258</a> | 633.3261 | 1264.6376 | 1264.6299 | 6.12 | 0     | 11     | 5.7    | 1       | R.TNAENEFVTIK.K  |
| <input checked="" type="checkbox"/> | <a href="#">354</a> | 738.3995 | 1474.7844 | 1474.7780 | 4.38 | 0     | (22)   | 0.4    | 1       | R.FLEQQNQVLQTK.W |
| <input checked="" type="checkbox"/> | <a href="#">355</a> | 738.4022 | 1474.7898 | 1474.7780 | 8.04 | 0     | 55     | 0.0002 | 1       | R.FLEQQNQVLQTK.W |

7. [IPI00222228](#) Mass: 58587 Score: 45 Queries matched: 3 emPAI: 0.06  
Tax\_Id=10090 Gene\_Symbol=4732456N10Rik hypothetical protein LOC239673

Check to include this hit in error tolerant search or archive report

| Query                               | Observed            | Mr(expt) | Mr(calc)  | ppm       | Miss  | Score | Expect | Rank   | Peptide |                     |
|-------------------------------------|---------------------|----------|-----------|-----------|-------|-------|--------|--------|---------|---------------------|
| <input checked="" type="checkbox"/> | <a href="#">263</a> | 639.3532 | 1276.6918 | 1276.7027 | -8.47 | 0     | (33)   | 0.036  | 1       | K.LALDIEIATYR.K     |
| <input checked="" type="checkbox"/> | <a href="#">264</a> | 639.3586 | 1276.7026 | 1276.7027 | -0.01 | 0     | 40     | 0.0068 | 1       | K.LALDIEIATYR.K     |
| <input checked="" type="checkbox"/> | <a href="#">577</a> | 906.4692 | 1810.9238 | 1810.8923 | 17.4  | 0     | 9      | 7.3    | 1       | R.TNLEPMFEAYITNLR.R |

8. [IPI00138892](#) Mass: 15004 Score: 43 Queries matched: 3 emPAI: 0.23  
Tax\_Id=10090 Gene\_Symbol=Uba52 Ubiquitin-60S ribosomal protein L40

Check to include this hit in error tolerant search or archive report

| Query                               | Observed            | Mr(expt) | Mr(calc)  | ppm       | Miss | Score | Expect | Rank  | Peptide |                      |
|-------------------------------------|---------------------|----------|-----------|-----------|------|-------|--------|-------|---------|----------------------|
| <input checked="" type="checkbox"/> | <a href="#">564</a> | 894.4686 | 1786.9226 | 1786.9200 | 1.47 | 0     | (35)   | 0.019 | 1       | K.TITLEVEPSDTIENVK.A |
| <input checked="" type="checkbox"/> | <a href="#">566</a> | 894.4698 | 1786.9250 | 1786.9200 | 2.82 | 0     | 37     | 0.011 | 1       | K.TITLEVEPSDTIENVK.A |
| <input checked="" type="checkbox"/> | <a href="#">567</a> | 894.4714 | 1786.9282 | 1786.9200 | 4.61 | 0     | (21)   | 0.48  | 1       | K.TITLEVEPSDTIENVK.A |

## Proteins matching the same set of peptides:

[IPI00470152](#) Mass: 18282 Score: 43 Queries matched: 3  
Tax\_Id=10090 Gene\_Symbol=Rps27a Ubiquitin-40S ribosomal protein S27a  
[IPI00895319](#) Mass: 22277 Score: 43 Queries matched: 3  
Tax\_Id=10090 Gene\_Symbol=2810422J05Rik 22 kDa protein  
[IPI00895479](#) Mass: 27181 Score: 43 Queries matched: 3  
Tax\_Id=10090 Gene\_Symbol=2810422J05Rik 27 kDa protein  
[IPI00918763](#) Mass: 11021 Score: 43 Queries matched: 3  
Tax\_Id=10090 Gene\_Symbol=Uba52 Ubiquitin subunit 1  
[IPI00750889](#) Mass: 22822 Score: 43 Queries matched: 3  
Tax\_Id=10090 Gene\_Symbol=Ubc Ubc protein  
[IPI00923013](#) Mass: 26603 Score: 43 Queries matched: 3  
Tax\_Id=10090 Gene\_Symbol=Ubb Ubiquitin B  
[IPI00923037](#) Mass: 22578 Score: 43 Queries matched: 3  
Tax\_Id=10090 Gene\_Symbol=Ubc Putative uncharacterized protein  
[IPI00139518](#) Mass: 34348 Score: 43 Queries matched: 3  
Tax\_Id=10090 Gene\_Symbol=Ubb Polyubiquitin-B  
[IPI00755916](#) Mass: 82614 Score: 43 Queries matched: 3  
Tax\_Id=10090 Gene\_Symbol=Ubc ubiquitin  
[IPI00969323](#) Mass: 82603 Score: 43 Queries matched: 3  
Tax\_Id=10090 Gene\_Symbol=Ubc Polyubiquitin-C

9. [IPI00874682](#) Mass: 36038 Score: 38 Queries matched: 3 emPAI: 0.09  
Tax\_Id=10090 Gene\_Symbol=- 36 kDa protein

Check to include this hit in error tolerant search or archive report

| Query                               | Observed            | Mr(expt) | Mr(calc)  | ppm       | Miss   | Score | Expect | Rank  | Peptide |                                             |
|-------------------------------------|---------------------|----------|-----------|-----------|--------|-------|--------|-------|---------|---------------------------------------------|
| <input checked="" type="checkbox"/> | <a href="#">306</a> | 685.3730 | 1368.7314 | 1368.7361 | -3.40  | 0     | 38     | 0.011 | 1       | R.GAAQNIIPASTGAAK.A                         |
| <input checked="" type="checkbox"/> | <a href="#">307</a> | 685.3763 | 1368.7380 | 1368.7361 | 1.42   | 0     | (6)    | 15    | 1       | R.GAAQNIIPASTGAAK.A                         |
|                                     | <a href="#">648</a> | 737.6991 | 2210.0755 | 2210.1075 | -14.50 | 0     | 1      | 38    | 2       | R.VIISAPSADAPMIVMGVNHEK.Y + 2 Oxidation (M) |

10. [IPI00223714](#) Mass: 21964 Score: 38 Queries matched: 2 emPAI: 0.15  
Tax\_Id=10090 Gene\_Symbol=Hist1hle Histone H1.4

Check to include this hit in error tolerant search or archive report

| Query               | Observed | Mr(expt)  | Mr(calc)  | ppm   | Miss | Score | Expect | Rank | Peptide          |
|---------------------|----------|-----------|-----------|-------|------|-------|--------|------|------------------|
| <a href="#">230</a> | 614.8427 | 1227.6708 | 1227.6711 | -0.18 | 0    | 38    | 0.012  | 1    | K.TSGPPVSELITK.A |
| <a href="#">231</a> | 614.8442 | 1227.6738 | 1227.6711 | 2.27  | 0    | (4)   |        | 28   | K.TSGPPVSELITK.A |

Peptide matches not assigned to protein hits: (no details means no match)

| Query               | Observed  | Mr(expt)  | Mr(calc)  | ppm    | Miss | Score | Expect | Rank | Peptide                                        |
|---------------------|-----------|-----------|-----------|--------|------|-------|--------|------|------------------------------------------------|
| <a href="#">138</a> | 523.2836  | 1044.5526 | 1044.5564 | -3.55  | 0    | 30    | 0.084  | 1    | INDITLNSR                                      |
| <a href="#">141</a> | 523.2860  | 1044.5574 | 1044.5564 | 1.05   | 0    | 30    | 0.089  | 1    | INDITLNSR                                      |
| <a href="#">140</a> | 523.2858  | 1044.5570 | 1044.5564 | 0.67   | 0    | 30    | 0.09   | 1    | INDITLNSR                                      |
| <a href="#">550</a> | 851.4625  | 1700.9104 | 1700.8985 | 7.02   | 0    | 29    | 0.065  | 1    | AVFVDLEPTVIDEVR                                |
| <a href="#">756</a> | 1188.2642 | 3561.7708 | 3561.7951 | -6.83  | 0    | 27    | 0.042  | 1    | TAGAQVVLTDQELQLWPSDLLKPSASEGLPPGSR             |
| <a href="#">82</a>  | 423.2244  | 844.4342  | 844.4515  | -20.40 | 1    | 26    | 0.29   | 1    | AIRENSR                                        |
| <a href="#">234</a> | 615.3033  | 1228.5920 | 1228.6088 | -13.63 | 0    | 21    | 0.5    | 1    | DAVLEFPFADR                                    |
| <a href="#">93</a>  | 435.7734  | 869.5322  | 869.5123  | 22.9   | 0    | 21    | 0.32   | 1    | VSLWLPR                                        |
| <a href="#">25</a>  | 325.1812  | 648.3478  | 648.3595  | -17.97 | 0    | 21    | 0.69   | 1    | AFNAVK                                         |
| <a href="#">137</a> | 523.2833  | 1044.5520 | 1044.5564 | -4.12  | 0    | 20    |        | 1    | INDITLNSR                                      |
| <a href="#">542</a> | 851.4489  | 1700.8832 | 1700.8985 | -8.98  | 0    | 19    | 0.8    | 1    | AVFVDLEPTVIDEVR                                |
| <a href="#">78</a>  | 421.7591  | 841.5036  | 841.4658  | 45.0   | 0    | 18    | 0.78   | 1    | ATHTVSVK                                       |
| <a href="#">270</a> | 651.8633  | 1301.7120 | 1301.7078 | 3.24   | 0    | 18    | 0.83   | 1    | SLDLSIIAEVK                                    |
| <a href="#">159</a> | 556.3107  | 1110.6068 | 1110.5777 | 26.2   | 1    | 17    | 0.98   | 1    | LMKTVQTMK + 2 Oxidation (M)                    |
| <a href="#">420</a> | 785.8442  | 1569.6738 | 1569.7466 | -46.32 | 1    | 17    | 0.51   | 1    | KWTMLLMNNTR + 2 Oxidation (M)                  |
| <a href="#">285</a> | 657.8660  | 1313.7174 | 1313.7092 | 6.30   | 0    | 17    | 1.3    | 1    | LATVGLQAAWR                                    |
| <a href="#">251</a> | 631.3092  | 1260.6038 | 1260.5656 | 30.3   | 0    | 17    | 1.5    | 1    | SDLEAHVESMK + Oxidation (M)                    |
| <a href="#">132</a> | 517.2679  | 1032.5212 | 1032.4771 | 42.8   | 1    | 16    | 2.1    | 1    | NAMRDPSSR                                      |
| <a href="#">91</a>  | 435.7730  | 869.5314  | 869.4971  | 39.6   | 0    | 15    | 1.4    | 1    | AVVESLPR                                       |
| <a href="#">235</a> | 615.3042  | 1228.5938 | 1228.6200 | -21.31 | 0    | 14    | 2.3    | 1    | IGGLNWAIDDR                                    |
| <a href="#">68</a>  | 412.7538  | 823.4930  | 823.5028  | -11.85 | 1    | 14    |        | 1    | VPSRLPR                                        |
| <a href="#">145</a> | 525.2818  | 1048.5490 | 1048.5553 | -5.93  | 0    | 14    | 3.3    | 1    | AAAGEIYNK                                      |
| <a href="#">288</a> | 657.8696  | 1313.7246 | 1313.7092 | 11.8   | 0    | 14    | 2.3    | 1    | LATVGLQAAWR                                    |
| <a href="#">67</a>  | 412.7532  | 823.4918  | 823.4664  | 30.9   | 0    | 14    | 1.1    | 1    | ALSIHQK                                        |
| <a href="#">50</a>  | 379.7120  | 757.4094  | 757.3719  | 49.6   | 0    | 14    | 4.4    | 1    | SSPAGSPR                                       |
| <a href="#">552</a> | 851.4630  | 1700.9114 | 1700.8985 | 7.60   | 0    | 14    |        | 2    | AVFVDLEPTVIDEVR                                |
| <a href="#">90</a>  | 435.7719  | 869.5292  | 869.4858  | 49.9   | 0    | 14    | 1.7    | 1    | VSGVEVPLA                                      |
| <a href="#">348</a> | 738.3803  | 1474.7460 | 1474.8065 | -40.98 | 1    | 14    | 3.2    | 1    | VESLLENMGIKVK + Oxidation (M)                  |
| <a href="#">64</a>  | 412.7518  | 823.4890  | 823.4916  | -3.07  | 0    | 14    | 1.2    | 1    | TVAPALPR                                       |
| <a href="#">269</a> | 651.8616  | 1301.7086 | 1301.6649 | 33.6   | 0    | 14    | 2.6    | 1    | ATIATMPVPETR + Oxidation (M)                   |
| <a href="#">549</a> | 851.4609  | 1700.9072 | 1700.8985 | 5.13   | 0    | 13    | 2.4    | 1    | AVFVDLEPTVIDEVR                                |
| <a href="#">142</a> | 523.2862  | 1044.5578 | 1044.5829 | -23.94 | 1    | 13    | 4.3    | 1    | AVGRRPFDK                                      |
| <a href="#">75</a>  | 421.7574  | 841.5002  | 841.4810  | 22.9   | 0    | 13    | 2.6    | 1    | AVLTWPR                                        |
| <a href="#">168</a> | 565.3207  | 1128.6268 | 1128.6291 | -2.01  | 0    | 13    | 3.6    | 1    | IGSGLAHAYIK                                    |
| <a href="#">86</a>  | 428.7643  | 855.5140  | 855.4814  | 38.2   | 0    | 13    | 2.5    | 1    | LGAETLPR                                       |
| <a href="#">638</a> | 1073.0280 | 2144.0414 | 2144.0055 | 16.7   | 1    | 13    | 2.6    | 1    | TPKPGNPSSESSKEVPSCK                            |
| <a href="#">681</a> | 791.7297  | 2372.1673 | 2372.2059 | -16.28 | 1    | 13    | 2.2    | 1    | DPLARLSNPLCANASYWAVVR                          |
| <a href="#">759</a> | 1188.2699 | 3561.7879 | 3561.6931 | 26.6   | 1    | 13    | 1.1    | 1    | TGWAMVSLCIVFAMTSGQMWHIRGPPYAHK + Oxidation (M) |
| <a href="#">259</a> | 634.3560  | 1266.6974 | 1266.6720 | 20.1   | 1    | 13    | 2.6    | 1    | RNIIGYFEQK                                     |
| <a href="#">670</a> | 1168.5640 | 2335.1134 | 2335.0751 | 16.4   | 1    | 13    | 2.4    | 1    | TPWRMDTSGTPQTADSATSPK                          |
| <a href="#">352</a> | 738.3887  | 1474.7628 | 1474.7741 | -7.66  | 0    | 12    | 4.1    | 1    | LMVEFPLDPAISK + Oxidation (M)                  |
| <a href="#">117</a> | 496.2275  | 990.4404  | 990.4804  | -40.33 | 1    | 12    | 2.8    | 1    | AKMDLEER                                       |
| <a href="#">76</a>  | 421.7582  | 841.5018  | 841.4658  | 42.9   | 0    | 12    | 3.3    | 1    | ATHTVSVK                                       |
| <a href="#">74</a>  | 421.7559  | 841.4972  | 841.4810  | 19.3   | 0    | 12    | 3.6    | 1    | AVLTWPR                                        |
| <a href="#">130</a> | 516.2977  | 1030.5808 | 1030.6036 | -22.07 | 1    | 12    | 5.2    | 1    | GLVGLNFR                                       |
| <a href="#">139</a> | 523.2856  | 1044.5566 | 1044.5564 | 0.28   | 0    | 12    | 6.6    | 1    | INDITLNSR                                      |
| <a href="#">271</a> | 651.8643  | 1301.7140 | 1301.7078 | 4.78   | 0    | 11    | 4.1    | 1    | SLDLSIIAEVK                                    |
| <a href="#">37</a>  | 692.3918  | 691.3845  | 691.3765  | 11.5   | 1    | 11    | 5.8    | 1    | KFAGNR                                         |
| <a href="#">94</a>  | 435.7735  | 869.5324  | 869.5698  | -42.96 | 1    | 11    | 3.1    | 1    | VLKILR                                         |
| <a href="#">553</a> | 851.4633  | 1700.9120 | 1700.8985 | 7.96   | 0    | 11    |        | 4    | AVFVDLEPTVIDEVR                                |
| <a href="#">298</a> | 672.8471  | 1343.6796 | 1343.7157 | -26.84 | 1    | 11    | 5.7    | 1    | GSVGRSSAPAASLGK                                |
| <a href="#">331</a> | 717.8047  | 1433.5948 | 1433.6535 | -40.92 | 1    | 11    | 1.7    | 1    | ALQRDWSGSDGK                                   |
| <a href="#">51</a>  | 379.7136  | 757.4126  | 757.4334  | -27.39 | 0    | 11    | 9.4    | 1    | GLNEVVK                                        |
| <a href="#">462</a> | 801.9191  | 1601.8236 | 1601.7443 | 49.6   | 0    | 11    | 5.7    | 1    | FHTMPACAATNLPR + Oxidation (M)                 |
| <a href="#">129</a> | 515.7794  | 1029.5442 | 1029.5931 | -47.43 | 1    | 11    |        | 8    | AQVKLSTQR                                      |
| <a href="#">312</a> | 691.3352  | 1380.6558 | 1380.6741 | -13.21 | 1    | 11    | 5.2    | 1    | KNVIMELSEMR + 2 Oxidation (M)                  |
| <a href="#">467</a> | 802.8889  | 1603.7632 | 1603.7512 | 7.53   | 0    | 10    | 5.8    | 1    | AEVMNPTRPVSSSET                                |
| <a href="#">654</a> | 737.7070  | 2210.0992 | 2210.0967 | 1.11   | 0    | 10    | 5.3    | 1    | LGEHNINVLEGNEQFIDAAK                           |
| <a href="#">398</a> | 785.8391  | 1569.6636 | 1569.6960 | -20.62 | 0    | 10    | 2.4    | 1    | ESWEAAQEAWAHR                                  |
| <a href="#">762</a> | 1188.2935 | 3561.8587 | 3561.9534 | -26.60 | 1    | 10    |        | 2    | ELLTGTDLWPVAIFTVIFILLVDLMHRHQK + Oxidation (M) |
| <a href="#">96</a>  | 435.7746  | 869.5346  | 869.5698  | -40.43 | 1    | 10    | 4.3    | 1    | VLKELR                                         |
| <a href="#">713</a> | 958.1292  | 2871.3658 | 2871.4477 | -28.53 | 1    | 10    |        | 4    | WDVCLTLSEKGFQISFVNSIATTK                       |
| <a href="#">350</a> | 738.3823  | 1474.7500 | 1474.6787 | 48.4   | 1    | 9     | 8.4    | 1    | VDTEPKAEASGDK                                  |
| <a href="#">73</a>  | 414.2264  | 826.4382  | 826.4773  | -47.26 | 1    | 9     | 6.3    | 1    | AALPRGSR                                       |
| <a href="#">340</a> | 738.3669  | 1474.7192 | 1474.7602 | -27.80 | 1    | 9     | 8.6    | 1    | GDGLFAQMRGGLLP                                 |
| <a href="#">543</a> | 851.4530  | 1700.8914 | 1700.8985 | -4.15  | 0    | 9     |        | 7    | AVFVDLEPTVIDEVR                                |
| <a href="#">95</a>  | 435.7746  | 869.5346  | 869.4971  | 43.2   | 0    | 9     | 4.7    | 1    | AVVESLPR                                       |
| <a href="#">345</a> | 738.3784  | 1474.7422 | 1474.7932 | -34.58 | 0    | 9     | 9.1    | 1    | LHHTSLPDFPAIK                                  |
| <a href="#">71</a>  | 414.2235  | 826.4324  | 826.4297  | 3.32   | 0    | 9     | 6.4    | 1    | DVLPNNR                                        |
| <a href="#">371</a> | 760.8850  | 1519.7554 | 1519.6833 | 47.5   | 1    | 9     | 9.1    | 1    | VLEMSMKSTCFR + 2 Oxidation (M)                 |
| <a href="#">77</a>  | 421.7587  | 841.5028  | 841.4810  | 25.9   | 0    | 9     | 7.1    | 1    | AVLTWPR                                        |
| <a href="#">176</a> | 565.3246  | 1128.6346 | 1128.5928 | 37.1   | 0    | 9     | 9.3    | 1    | TDVNPFLAPR                                     |
| <a href="#">729</a> | 772.4192  | 3085.6477 | 3085.5989 | 15.8   | 0    | 8     | 2.7    | 1    | MILGIILSMVVISIFVFSCLLHHEHK + 2 Oxidation (M)   |

|     |           |           |           |        |   |   |     |   |                                                     |
|-----|-----------|-----------|-----------|--------|---|---|-----|---|-----------------------------------------------------|
| 489 | 810.8901  | 1619.7656 | 1619.7865 | -12.89 | 0 | 8 | 9.1 | 1 | GLYDGPVCEVSVTPK                                     |
| 128 | 514.2868  | 1026.5590 | 1026.5458 | 12.9   | 0 | 8 | 10  | 1 | GPLVQGVDSR                                          |
| 460 | 801.4333  | 1600.8520 | 1600.8429 | 5.71   | 0 | 8 | 9   | 1 | SMIISATIHMQVVR + Oxidation (M)                      |
| 614 | 1057.5195 | 2113.0244 | 2112.9687 | 26.4   | 1 | 8 | 9.3 | 1 | KCFQTAHFYLEDNTPFR                                   |
| 646 | 737.3643  | 2209.0711 | 2209.1491 | -35.32 | 1 | 8 | 8.3 | 1 | LGEHNIKVLEGNQFVNAAK                                 |
| 282 | 657.8612  | 1313.7078 | 1313.7415 | -25.63 | 1 | 8 | 12  | 1 | AALASVLRATGR                                        |
| 314 | 691.3487  | 1380.6828 | 1380.7150 | -23.26 | 0 | 8 | 12  | 1 | EHLGLSWAELAR                                        |
| 69  | 412.7543  | 823.4940  | 823.4817  | 15.0   | 0 | 8 | 4.8 | 1 | RPWLPFR                                             |
| 92  | 435.7733  | 869.5320  | 869.5334  | -1.61  | 1 | 8 | 7   | 1 | VTPKQGIK                                            |
| 643 | 732.0196  | 2193.0370 | 2193.0452 | -3.76  | 1 | 7 | 8.9 | 1 | FGSDPATYNGFLEIMKEFK                                 |
| 422 | 785.8444  | 1569.6742 | 1569.6399 | 21.9   | 1 | 7 | 5.4 | 1 | MKTECDSEQGETR                                       |
| 279 | 652.3647  | 1302.7148 | 1302.6608 | 41.5   | 1 | 7 | 13  | 1 | KWQPPVFSDDI                                         |
| 233 | 615.3006  | 1228.5866 | 1228.5989 | -9.97  | 0 | 7 | 13  | 1 | GEWPWQASLR                                          |
| 72  | 414.2238  | 826.4330  | 826.4198  | 16.0   | 1 | 7 | 12  | 1 | HHYSKR                                              |
| 508 | 816.8943  | 1631.7740 | 1631.8460 | -44.10 | 0 | 7 | 14  | 1 | LVFAAYGNVFSAFAR                                     |
| 663 | 763.3481  | 2287.0225 | 2287.1154 | -40.63 | 1 | 7 | 6.9 | 1 | EMKAEVNAVGSATYESIGSLR + Oxidation (M)               |
| 546 | 851.4565  | 1700.8984 | 1700.8985 | -0.04  | 0 | 7 | 12  | 1 | AVFVDLEPTVIDEVR                                     |
| 297 | 670.8989  | 1339.7832 | 1339.7282 | 41.1   | 1 | 6 | 7.2 | 1 | KMPVGLPEAVGSR                                       |
| 761 | 1188.2787 | 3561.8143 | 3561.7859 | 7.96   | 1 | 6 | 5.3 | 1 | QQQQTGNHPITVHCSAGAGRTGTFIALSNIER                    |
| 695 | 888.7545  | 2663.2417 | 2663.3009 | -22.24 | 1 | 6 | 11  | 1 | WMGVSDKSVIVCSTGSSLLLFMSK + 2 Oxidation (M)          |
| 622 | 709.6712  | 2125.9918 | 2125.9747 | 8.01   | 1 | 5 | 13  | 1 | ITCAQTFNFRGLCMYK + Oxidation (M)                    |
| 113 | 485.7493  | 969.4840  | 969.4563  | 28.6   | 1 | 5 | 17  | 1 | HCRDQVR                                             |
| 636 | 1073.0161 | 2144.0176 | 2143.9740 | 20.3   | 1 | 5 | 15  | 1 | KWMEQFEMAMSNIKPKD + 2 Oxidation (M)                 |
| 605 | 704.9991  | 2111.9755 | 2112.0773 | -48.20 | 1 | 5 | 13  | 1 | AFIATSTEGTDKGIMLNTVK + Oxidation (M)                |
| 649 | 737.6996  | 2210.0770 | 2210.0967 | -8.94  | 0 | 5 | 16  | 1 | LGEHNINVLGNEQFIDAAK                                 |
| 754 | 891.4431  | 3561.7433 | 3561.6393 | 29.2   | 1 | 5 | 7   | 1 | MVKDSSLVACAFSPDGLFVTGSSGGDLTVWDDR + Oxidation (M)   |
| 89  | 435.7656  | 869.5166  | 869.5083  | 9.60   | 1 | 5 | 15  | 1 | VGQPVRSK                                            |
| 640 | 1073.0392 | 2144.0638 | 2144.1399 | -35.45 | 1 | 5 | 19  | 1 | IGPISDTSPELMDGVGSLKK + Oxidation (M)                |
| 299 | 672.8474  | 1343.6802 | 1343.6616 | 13.9   | 1 | 5 | 24  | 1 | CASKQAAVEPGAR                                       |
| 680 | 1177.0856 | 2352.1566 | 2352.1518 | 2.04   | 0 | 5 | 16  | 1 | ETEAEAQVSLPALLMEHLDK                                |
| 589 | 976.4807  | 1950.9468 | 1950.9543 | -3.84  | 0 | 5 | 20  | 1 | DEIQCVVATVAFMGINK                                   |
| 36  | 692.3890  | 691.3817  | 691.3574  | 35.1   | 0 | 5 | 28  | 1 | TALMEK                                              |
| 570 | 897.8961  | 1793.7776 | 1793.7699 | 4.32   | 1 | 4 | 12  | 1 | MSYLKTTMEDEESSK + Oxidation (M)                     |
| 688 | 819.4637  | 2455.3693 | 2455.2642 | 42.8   | 1 | 4 | 5.7 | 1 | VREVEVVPNSMGGQGLLGASVR + Oxidation (M)              |
| 210 | 574.3311  | 1146.6476 | 1146.6318 | 13.8   | 0 | 4 | 18  | 1 | TAMIVAIVLGGK + Oxidation (M)                        |
| 571 | 897.9096  | 1793.8046 | 1793.8764 | -40.00 | 1 | 4 | 16  | 1 | NTMLSTPCVATKQSTR                                    |
| 709 | 929.7959  | 2786.3659 | 2786.5001 | -48.16 | 1 | 4 | 15  | 1 | GLDLLQTCFVVGSSLNLPRLQSLSL                           |
| 609 | 1057.0087 | 2112.0028 | 2112.0487 | -21.71 | 1 | 4 | 19  | 1 | EKWLQGVPGATAEER                                     |
| 734 | 801.4522  | 3201.7797 | 3201.8601 | -25.11 | 1 | 4 | 4.6 | 1 | PPPPGPAALGTALLLLLLLASESHTVLLRAR                     |
| 255 | 631.8049  | 1261.5952 | 1261.5537 | 33.0   | 0 | 4 | 26  | 1 | MDFSDDYLLK + Oxidation (M)                          |
| 396 | 785.8381  | 1569.6616 | 1569.7059 | -28.22 | 0 | 4 | 8.8 | 1 | TEGASPEGEGTPWPR                                     |
| 114 | 485.7534  | 969.4922  | 969.4992  | -7.16  | 0 | 4 | 23  | 1 | SQQPGGQLR                                           |
| 711 | 933.4422  | 2797.3048 | 2797.2450 | 21.4   | 1 | 4 | 14  | 1 | GARSVAGAGGGCPAGGNDFQWCFSSQVK                        |
| 522 | 816.8959  | 1631.7772 | 1631.8195 | -25.90 | 1 | 4 | 26  | 1 | TEFTFLDYVKQNK                                       |
| 87  | 428.7668  | 855.5190  | 855.4814  | 44.0   | 1 | 4 | 20  | 1 | IDRLPKD                                             |
| 573 | 897.9128  | 1793.8110 | 1793.7699 | 22.9   | 1 | 4 | 20  | 1 | MSYLKTTMEDEESSK + Oxidation (M)                     |
| 178 | 565.3273  | 1128.6400 | 1128.5961 | 38.9   | 0 | 4 | 28  | 1 | AVMQSQKPPK + Oxidation (M)                          |
| 70  | 414.2226  | 826.4306  | 826.4259  | 5.80   | 0 | 4 | 24  | 1 | YLVMSAK + Oxidation (M)                             |
| 760 | 1188.2722 | 3561.7948 | 3561.7951 | -0.09  | 0 | 4 | 9.6 | 1 | TAGAQQVLTDLQELQWPSDLLKPSASEGLPPGSR                  |
| 671 | 1168.5660 | 2335.1174 | 2335.2019 | -36.17 | 0 | 4 | 20  | 1 | LISATDIQYSASLLNSLNEQR                               |
| 131 | 517.2668  | 1032.5190 | 1032.5352 | -15.68 | 1 | 3 | 39  | 1 | RLQYDPDGK                                           |
| 148 | 530.7909  | 1059.5672 | 1059.6077 | -38.14 | 1 | 3 | 48  | 1 | VATHTLKYK                                           |
| 49  | 379.7111  | 757.4076  | 757.4195  | -15.60 | 1 | 3 | 55  | 1 | DALRQR                                              |
| 618 | 707.3326  | 2118.9760 | 2118.9826 | -3.14  | 1 | 3 | 21  | 1 | LKNTSEQDQPMGGWEMIR                                  |
| 697 | 903.1155  | 2706.3247 | 2706.2570 | 25.0   | 1 | 3 | 20  | 1 | KDVLFGNMAEIEYFHNIFMSR + 2 Oxidation (M)             |
| 281 | 657.8579  | 1313.7012 | 1313.6438 | 43.7   | 0 | 3 | 37  | 1 | LGLTGLPSYQMR                                        |
| 490 | 816.8853  | 1631.7560 | 1631.7474 | 5.28   | 1 | 3 | 28  | 1 | SMVNGGWSGEPFR + Oxidation (M)                       |
| 532 | 816.8991  | 1631.7836 | 1631.8460 | -38.21 | 0 | 3 | 33  | 1 | LVFAAYGNVFSAFAR                                     |
| 478 | 810.4119  | 1618.8092 | 1618.8501 | -25.23 | 1 | 3 | 37  | 1 | SACREVFTQLPALK                                      |
| 647 | 737.6964  | 2210.0674 | 2210.0929 | -11.54 | 1 | 3 | 26  | 1 | ELGHEGLYEYTELKTVAMK                                 |
| 346 | 738.3788  | 1474.7430 | 1474.7528 | -6.64  | 1 | 3 | 40  | 1 | ADGLYRGSPLVDR                                       |
| 126 | 514.2750  | 1026.5354 | 1026.5094 | 25.4   | 0 | 3 | 35  | 1 | NVEGPEGLGR                                          |
| 110 | 476.7457  | 951.4768  | 951.4331  | 46.0   | 1 | 2 | 42  | 1 | MTKGEENK + Oxidation (M)                            |
| 764 | 905.7182  | 3618.8437 | 3618.6866 | 43.4   | 1 | 2 | 13  | 1 | VAVVSDGCDTGVALRFGAMLGNYSCAAQGTQGGSK + Oxidation (M) |
| 740 | 851.2089  | 3400.8065 | 3400.7409 | 19.3   | 1 | 2 | 11  | 1 | QLISVFSPPQELGASLAQLVAQRAASCLEGR                     |
| 456 | 795.8763  | 1589.7380 | 1589.7113 | 16.8   | 1 | 2 | 33  | 1 | TQMQQMHGRMPVPV + 3 Oxidation (M)                    |
| 252 | 631.3129  | 1260.6112 | 1260.6172 | -4.76  | 0 | 2 | 47  | 1 | GLLSVYMSGYR + Oxidation (M)                         |
| 776 | 1019.7321 | 4074.8993 | 4074.8525 | 11.5   | 1 | 2 | 11  | 1 | LFATEECFAICNQLQMHGGYGLKDYAVQYMR                     |
| 648 | 737.6991  | 2210.0755 | 2210.0500 | 11.5   | 0 | 2 | 34  | 1 | VMQNFSPQPCQETQIPLK + Oxidation (M)                  |
| 27  | 325.1888  | 648.3630  | 648.3629  | 0.28   | 1 | 2 | 39  | 1 | GLGMKK + Oxidation (M)                              |
| 574 | 897.9168  | 1793.8190 | 1793.9029 | -46.73 | 1 | 2 | 35  | 1 | NRNLSGGVLMGFMNLR + Oxidation (M)                    |
| 501 | 816.8934  | 1631.7722 | 1631.7951 | -13.98 | 1 | 2 | 44  | 1 | AAGCPTGPHKAQPPR                                     |
| 339 | 736.8575  | 1471.7004 | 1471.6990 | 0.97   | 0 | 2 | 44  | 1 | MNLGNTWIHNTR + Oxidation (M)                        |
| 590 | 656.9555  | 1967.8447 | 1967.8274 | 8.76   | 0 | 2 | 17  | 1 | ATQADLMELDMAMEPDR + 2 Oxidation (M)                 |
| 627 | 1072.5190 | 2143.0234 | 2143.0521 | -13.35 | 1 | 1 | 36  | 1 | IMGGVDAEEGKWPWQVSVR                                 |
| 150 | 533.2669  | 1064.5192 | 1064.4743 | 42.2   | 0 | 1 | 55  | 1 | IQACAMESR                                           |
| 344 | 738.3780  | 1474.7414 | 1474.8065 | -44.10 | 1 | 1 | 57  | 1 | VESLENNMGIKVK + Oxidation (M)                       |
| 746 | 863.4315  | 3449.6969 | 3449.7368 | -11.57 | 0 | 1 | 18  | 1 | IGVPQASDLAAEAVVLHYTDWLHPEDPHTLR                     |
| 26  | 325.1886  | 648.3626  | 648.3595  | 4.86   | 0 | 1 | 45  | 1 | AFNAVK                                              |
| 741 | 851.4378  | 3401.7221 | 3401.6532 | 20.3   | 0 | 1 | 19  | 1 | MGIPLTWMLLVMVTSWFTLAEASNSTEAR + Oxidation (M)       |
| 668 | 779.0337  | 2334.0793 | 2334.1196 | -17.26 | 1 | 1 | 28  | 1 | AGRVCEGDMVPIPTGDELSVTTK                             |

|                                     |                     |           |           |           |        |   |   |    |   |                                   |
|-------------------------------------|---------------------|-----------|-----------|-----------|--------|---|---|----|---|-----------------------------------|
| <input checked="" type="checkbox"/> | <a href="#">639</a> | 1073.0326 | 2144.0506 | 2143.9844 | 30.9   | 0 | 1 | 48 | 1 | EMFAQDHPVNSLEEVVR + Oxidation (M) |
| <input checked="" type="checkbox"/> | <a href="#">617</a> | 707.3309  | 2118.9709 | 2119.0599 | -42.02 | 1 | 0 | 37 | 1 | FREFVYQEAAGPHQTLAR                |
| <input checked="" type="checkbox"/> | <a href="#">488</a> | 810.8825  | 1619.7504 | 1619.7209 | 18.2   | 0 | 0 | 52 | 1 | LEASADANIQDNMGR + Oxidation (M)   |
| <input checked="" type="checkbox"/> | <a href="#">632</a> | 715.6734  | 2143.9984 | 2144.0498 | -23.98 | 1 | 0 | 41 | 1 | KLQNSIQESTQNFDDHLK                |
| <input checked="" type="checkbox"/> | <a href="#">183</a> | 574.3185  | 1146.6224 | 1146.6145 | 6.89   | 1 | 0 | 70 | 1 | AGSAWVSKVSR                       |
| <input checked="" type="checkbox"/> | <a href="#">120</a> | 505.7470  | 1009.4794 | 1009.5127 | -32.96 | 1 | 0 | 59 | 1 | VRQMFASR + Oxidation (M)          |
| <input checked="" type="checkbox"/> | <a href="#">470</a> | 805.9015  | 1609.7884 | 1609.8538 | -40.57 | 1 | 0 | 61 | 1 | EISNGKWLlyLMK + Oxidation (M)     |
| <input checked="" type="checkbox"/> | <a href="#">1</a>   | 355.0797  | 354.0724  |           |        |   |   |    |   |                                   |
| <input checked="" type="checkbox"/> | <a href="#">2</a>   | 361.1398  | 360.1325  |           |        |   |   |    |   |                                   |
| <input checked="" type="checkbox"/> | <a href="#">3</a>   | 361.1489  | 360.1416  |           |        |   |   |    |   |                                   |
| <input checked="" type="checkbox"/> | <a href="#">4</a>   | 424.3160  | 423.3087  |           |        |   |   |    |   |                                   |
| <input checked="" type="checkbox"/> | <a href="#">5</a>   | 429.1035  | 428.0962  |           |        |   |   |    |   |                                   |
| <input checked="" type="checkbox"/> | <a href="#">6</a>   | 445.1225  | 444.1152  |           |        |   |   |    |   |                                   |
| <input checked="" type="checkbox"/> | <a href="#">7</a>   | 445.1355  | 444.1282  |           |        |   |   |    |   |                                   |
| <input checked="" type="checkbox"/> | <a href="#">8</a>   | 453.1935  | 452.1862  |           |        |   |   |    |   |                                   |
| <input checked="" type="checkbox"/> | <a href="#">9</a>   | 472.2896  | 471.2823  |           |        |   |   |    |   |                                   |
| <input checked="" type="checkbox"/> | <a href="#">10</a>  | 484.8884  | 483.8811  |           |        |   |   |    |   |                                   |
| <input checked="" type="checkbox"/> | <a href="#">11</a>  | 503.1200  | 502.1127  |           |        |   |   |    |   |                                   |
| <input checked="" type="checkbox"/> | <a href="#">12</a>  | 503.3114  | 502.3041  |           |        |   |   |    |   |                                   |
| <input checked="" type="checkbox"/> | <a href="#">13</a>  | 517.2617  | 516.2544  |           |        |   |   |    |   |                                   |
| <input checked="" type="checkbox"/> | <a href="#">14</a>  | 517.7728  | 516.7655  |           |        |   |   |    |   |                                   |
| <input checked="" type="checkbox"/> | <a href="#">15</a>  | 519.1511  | 518.1438  |           |        |   |   |    |   |                                   |
| <input checked="" type="checkbox"/> | <a href="#">16</a>  | 519.2682  | 518.2609  |           |        |   |   |    |   |                                   |
| <input checked="" type="checkbox"/> | <a href="#">17</a>  | 582.3313  | 581.3240  |           |        |   |   |    |   |                                   |
| <input checked="" type="checkbox"/> | <a href="#">18</a>  | 591.3353  | 590.3280  |           |        |   |   |    |   |                                   |
| <input checked="" type="checkbox"/> | <a href="#">19</a>  | 591.3372  | 590.3299  |           |        |   |   |    |   |                                   |
| <input checked="" type="checkbox"/> | <a href="#">20</a>  | 591.3375  | 590.3302  |           |        |   |   |    |   |                                   |
| <input checked="" type="checkbox"/> | <a href="#">21</a>  | 615.7893  | 614.7820  |           |        |   |   |    |   |                                   |
| <input checked="" type="checkbox"/> | <a href="#">22</a>  | 616.3849  | 615.3776  |           |        |   |   |    |   |                                   |
| <input checked="" type="checkbox"/> | <a href="#">23</a>  | 618.2722  | 617.2649  |           |        |   |   |    |   |                                   |
| <input checked="" type="checkbox"/> | <a href="#">24</a>  | 632.3665  | 631.3592  |           |        |   |   |    |   |                                   |
| <input checked="" type="checkbox"/> | <a href="#">28</a>  | 327.6999  | 653.3852  |           |        |   |   |    |   |                                   |
| <input checked="" type="checkbox"/> | <a href="#">29</a>  | 327.7017  | 653.3888  |           |        |   |   |    |   |                                   |
| <input checked="" type="checkbox"/> | <a href="#">30</a>  | 332.5570  | 663.0994  |           |        |   |   |    |   |                                   |
| <input checked="" type="checkbox"/> | <a href="#">31</a>  | 670.8994  | 669.8921  |           |        |   |   |    |   |                                   |
| <input checked="" type="checkbox"/> | <a href="#">32</a>  | 688.3806  | 687.3733  |           |        |   |   |    |   |                                   |
| <input checked="" type="checkbox"/> | <a href="#">33</a>  | 692.3674  | 691.3601  |           |        |   |   |    |   |                                   |
| <input checked="" type="checkbox"/> | <a href="#">34</a>  | 692.3825  | 691.3752  |           |        |   |   |    |   |                                   |
| <input checked="" type="checkbox"/> | <a href="#">35</a>  | 692.3873  | 691.3800  |           |        |   |   |    |   |                                   |
| <input checked="" type="checkbox"/> | <a href="#">38</a>  | 714.7493  | 713.7420  |           |        |   |   |    |   |                                   |
| <input checked="" type="checkbox"/> | <a href="#">39</a>  | 718.3547  | 717.3474  |           |        |   |   |    |   |                                   |
| <input checked="" type="checkbox"/> | <a href="#">40</a>  | 722.3738  | 721.3665  |           |        |   |   |    |   |                                   |
| <input checked="" type="checkbox"/> | <a href="#">41</a>  | 729.8591  | 728.8518  |           |        |   |   |    |   |                                   |
| <input checked="" type="checkbox"/> | <a href="#">42</a>  | 729.8614  | 728.8541  |           |        |   |   |    |   |                                   |
| <input checked="" type="checkbox"/> | <a href="#">43</a>  | 736.8525  | 735.8452  |           |        |   |   |    |   |                                   |
| <input checked="" type="checkbox"/> | <a href="#">44</a>  | 742.7342  | 741.7269  |           |        |   |   |    |   |                                   |
| <input checked="" type="checkbox"/> | <a href="#">45</a>  | 743.8713  | 742.8640  |           |        |   |   |    |   |                                   |
| <input checked="" type="checkbox"/> | <a href="#">46</a>  | 744.4328  | 743.4255  |           |        |   |   |    |   |                                   |
| <input checked="" type="checkbox"/> | <a href="#">47</a>  | 747.8560  | 746.8487  |           |        |   |   |    |   |                                   |
| <input checked="" type="checkbox"/> | <a href="#">48</a>  | 755.4680  | 754.4607  |           |        |   |   |    |   |                                   |
| <input checked="" type="checkbox"/> | <a href="#">52</a>  | 761.3905  | 760.3832  |           |        |   |   |    |   |                                   |
| <input checked="" type="checkbox"/> | <a href="#">53</a>  | 763.4495  | 762.4422  |           |        |   |   |    |   |                                   |
| <input checked="" type="checkbox"/> | <a href="#">54</a>  | 772.7581  | 771.7508  |           |        |   |   |    |   |                                   |
| <input checked="" type="checkbox"/> | <a href="#">55</a>  | 793.4175  | 792.4102  |           |        |   |   |    |   |                                   |
| <input checked="" type="checkbox"/> | <a href="#">56</a>  | 793.4280  | 792.4207  |           |        |   |   |    |   |                                   |
| <input checked="" type="checkbox"/> | <a href="#">57</a>  | 793.4313  | 792.4240  |           |        |   |   |    |   |                                   |
| <input checked="" type="checkbox"/> | <a href="#">58</a>  | 793.4393  | 792.4320  |           |        |   |   |    |   |                                   |
| <input checked="" type="checkbox"/> | <a href="#">59</a>  | 797.3967  | 796.3894  |           |        |   |   |    |   |                                   |
| <input checked="" type="checkbox"/> | <a href="#">60</a>  | 797.6718  | 796.6645  |           |        |   |   |    |   |                                   |
| <input checked="" type="checkbox"/> | <a href="#">61</a>  | 802.7986  | 801.7913  |           |        |   |   |    |   |                                   |
| <input checked="" type="checkbox"/> | <a href="#">62</a>  | 808.3721  | 807.3648  |           |        |   |   |    |   |                                   |
| <input checked="" type="checkbox"/> | <a href="#">63</a>  | 810.4214  | 809.4141  |           |        |   |   |    |   |                                   |
| <input checked="" type="checkbox"/> | <a href="#">65</a>  | 412.7524  | 823.4902  |           |        |   |   |    |   |                                   |
| <input checked="" type="checkbox"/> | <a href="#">66</a>  | 412.7527  | 823.4908  |           |        |   |   |    |   |                                   |
| <input checked="" type="checkbox"/> | <a href="#">79</a>  | 421.7620  | 841.5094  |           |        |   |   |    |   |                                   |
| <input checked="" type="checkbox"/> | <a href="#">80</a>  | 842.5316  | 841.5243  |           |        |   |   |    |   |                                   |
| <input checked="" type="checkbox"/> | <a href="#">81</a>  | 423.2233  | 844.4320  |           |        |   |   |    |   |                                   |
| <input checked="" type="checkbox"/> | <a href="#">83</a>  | 423.2282  | 844.4418  |           |        |   |   |    |   |                                   |
| <input checked="" type="checkbox"/> | <a href="#">84</a>  | 846.4227  | 845.4154  |           |        |   |   |    |   |                                   |
| <input checked="" type="checkbox"/> | <a href="#">85</a>  | 846.4623  | 845.4550  |           |        |   |   |    |   |                                   |
| <input checked="" type="checkbox"/> | <a href="#">88</a>  | 863.7095  | 862.7022  |           |        |   |   |    |   |                                   |
| <input checked="" type="checkbox"/> | <a href="#">97</a>  | 872.5276  | 871.5203  |           |        |   |   |    |   |                                   |
| <input checked="" type="checkbox"/> | <a href="#">98</a>  | 874.5309  | 873.5236  |           |        |   |   |    |   |                                   |
| <input checked="" type="checkbox"/> | <a href="#">99</a>  | 438.7576  | 875.5006  |           |        |   |   |    |   |                                   |
| <input checked="" type="checkbox"/> | <a href="#">100</a> | 894.7733  | 893.7660  |           |        |   |   |    |   |                                   |
| <input checked="" type="checkbox"/> | <a href="#">101</a> | 906.5190  | 905.5117  |           |        |   |   |    |   |                                   |
| <input checked="" type="checkbox"/> | <a href="#">102</a> | 906.5303  | 905.5230  |           |        |   |   |    |   |                                   |
| <input checked="" type="checkbox"/> | <a href="#">103</a> | 906.5461  | 905.5388  |           |        |   |   |    |   |                                   |
| <input checked="" type="checkbox"/> | <a href="#">104</a> | 920.4861  | 919.4788  |           |        |   |   |    |   |                                   |
| <input checked="" type="checkbox"/> | <a href="#">106</a> | 932.4200  | 931.4127  |           |        |   |   |    |   |                                   |
| <input checked="" type="checkbox"/> | <a href="#">107</a> | 470.8339  | 939.6532  |           |        |   |   |    |   |                                   |

|                                     |                     |           |           |
|-------------------------------------|---------------------|-----------|-----------|
| <input checked="" type="checkbox"/> | <a href="#">108</a> | 951.4979  | 950.4906  |
| <input checked="" type="checkbox"/> | <a href="#">109</a> | 951.8571  | 950.8498  |
| <input checked="" type="checkbox"/> | <a href="#">111</a> | 478.1041  | 954.1936  |
| <input checked="" type="checkbox"/> | <a href="#">112</a> | 963.6493  | 962.6420  |
| <input checked="" type="checkbox"/> | <a href="#">115</a> | 977.7725  | 976.7652  |
| <input checked="" type="checkbox"/> | <a href="#">116</a> | 982.6216  | 981.6143  |
| <input checked="" type="checkbox"/> | <a href="#">118</a> | 999.6141  | 998.6068  |
| <input checked="" type="checkbox"/> | <a href="#">119</a> | 505.2855  | 1008.5564 |
| <input checked="" type="checkbox"/> | <a href="#">121</a> | 510.2983  | 1018.5820 |
| <input checked="" type="checkbox"/> | <a href="#">122</a> | 510.2990  | 1018.5834 |
| <input checked="" type="checkbox"/> | <a href="#">123</a> | 510.3012  | 1018.5878 |
| <input checked="" type="checkbox"/> | <a href="#">124</a> | 1021.6116 | 1020.6043 |
| <input checked="" type="checkbox"/> | <a href="#">125</a> | 1021.8164 | 1020.8091 |
| <input checked="" type="checkbox"/> | <a href="#">127</a> | 514.2797  | 1026.5448 |
| <input checked="" type="checkbox"/> | <a href="#">136</a> | 520.2693  | 1038.5240 |
| <input checked="" type="checkbox"/> | <a href="#">143</a> | 524.7946  | 1047.5746 |
| <input checked="" type="checkbox"/> | <a href="#">144</a> | 525.2810  | 1048.5474 |
| <input checked="" type="checkbox"/> | <a href="#">146</a> | 525.2917  | 1048.5688 |
| <input checked="" type="checkbox"/> | <a href="#">147</a> | 530.7836  | 1059.5526 |
| <input checked="" type="checkbox"/> | <a href="#">149</a> | 533.2592  | 1064.5038 |
| <input checked="" type="checkbox"/> | <a href="#">151</a> | 538.1253  | 1074.2360 |
| <input checked="" type="checkbox"/> | <a href="#">152</a> | 542.7958  | 1083.5770 |
| <input checked="" type="checkbox"/> | <a href="#">153</a> | 545.7363  | 1089.4580 |
| <input checked="" type="checkbox"/> | <a href="#">154</a> | 545.7634  | 1089.5122 |
| <input checked="" type="checkbox"/> | <a href="#">155</a> | 545.7640  | 1089.5134 |
| <input checked="" type="checkbox"/> | <a href="#">156</a> | 545.7656  | 1089.5166 |
| <input checked="" type="checkbox"/> | <a href="#">157</a> | 546.7594  | 1091.5042 |
| <input checked="" type="checkbox"/> | <a href="#">158</a> | 554.2649  | 1106.5152 |
| <input checked="" type="checkbox"/> | <a href="#">160</a> | 556.3140  | 1110.6134 |
| <input checked="" type="checkbox"/> | <a href="#">161</a> | 556.3168  | 1110.6190 |
| <input checked="" type="checkbox"/> | <a href="#">162</a> | 562.2876  | 1122.5606 |
| <input checked="" type="checkbox"/> | <a href="#">163</a> | 563.8179  | 1125.6212 |
| <input checked="" type="checkbox"/> | <a href="#">164</a> | 565.3137  | 1128.6128 |
| <input checked="" type="checkbox"/> | <a href="#">165</a> | 565.3169  | 1128.6192 |
| <input checked="" type="checkbox"/> | <a href="#">166</a> | 565.3170  | 1128.6194 |
| <input checked="" type="checkbox"/> | <a href="#">167</a> | 565.3181  | 1128.6216 |
| <input checked="" type="checkbox"/> | <a href="#">169</a> | 565.3208  | 1128.6270 |
| <input checked="" type="checkbox"/> | <a href="#">170</a> | 565.3210  | 1128.6274 |
| <input checked="" type="checkbox"/> | <a href="#">171</a> | 565.3214  | 1128.6282 |
| <input checked="" type="checkbox"/> | <a href="#">172</a> | 565.3215  | 1128.6284 |
| <input checked="" type="checkbox"/> | <a href="#">173</a> | 565.3229  | 1128.6312 |
| <input checked="" type="checkbox"/> | <a href="#">174</a> | 565.3243  | 1128.6340 |
| <input checked="" type="checkbox"/> | <a href="#">175</a> | 565.3245  | 1128.6344 |
| <input checked="" type="checkbox"/> | <a href="#">177</a> | 565.3268  | 1128.6390 |
| <input checked="" type="checkbox"/> | <a href="#">179</a> | 565.3289  | 1128.6432 |
| <input checked="" type="checkbox"/> | <a href="#">180</a> | 565.3292  | 1128.6438 |
| <input checked="" type="checkbox"/> | <a href="#">181</a> | 572.3431  | 1142.6716 |
| <input checked="" type="checkbox"/> | <a href="#">182</a> | 574.3153  | 1146.6160 |
| <input checked="" type="checkbox"/> | <a href="#">185</a> | 574.3215  | 1146.6284 |
| <input checked="" type="checkbox"/> | <a href="#">186</a> | 574.3222  | 1146.6298 |
| <input checked="" type="checkbox"/> | <a href="#">187</a> | 574.3236  | 1146.6326 |
| <input checked="" type="checkbox"/> | <a href="#">188</a> | 574.3245  | 1146.6344 |
| <input checked="" type="checkbox"/> | <a href="#">189</a> | 574.3263  | 1146.6380 |
| <input checked="" type="checkbox"/> | <a href="#">194</a> | 574.3277  | 1146.6408 |
| <input checked="" type="checkbox"/> | <a href="#">196</a> | 574.3279  | 1146.6412 |
| <input checked="" type="checkbox"/> | <a href="#">206</a> | 574.3306  | 1146.6466 |
| <input checked="" type="checkbox"/> | <a href="#">211</a> | 574.3311  | 1146.6476 |
| <input checked="" type="checkbox"/> | <a href="#">215</a> | 1148.7328 | 1147.7255 |
| <input checked="" type="checkbox"/> | <a href="#">216</a> | 579.2955  | 1156.5764 |
| <input checked="" type="checkbox"/> | <a href="#">218</a> | 1162.4799 | 1161.4726 |
| <input checked="" type="checkbox"/> | <a href="#">219</a> | 582.3195  | 1162.6244 |
| <input checked="" type="checkbox"/> | <a href="#">220</a> | 582.3254  | 1162.6362 |
| <input checked="" type="checkbox"/> | <a href="#">221</a> | 582.3277  | 1162.6408 |
| <input checked="" type="checkbox"/> | <a href="#">222</a> | 582.3297  | 1162.6448 |
| <input checked="" type="checkbox"/> | <a href="#">223</a> | 583.2960  | 1164.5774 |
| <input checked="" type="checkbox"/> | <a href="#">224</a> | 584.8265  | 1167.6384 |
| <input checked="" type="checkbox"/> | <a href="#">225</a> | 588.3420  | 1174.6694 |
| <input checked="" type="checkbox"/> | <a href="#">226</a> | 590.2976  | 1178.5806 |
| <input checked="" type="checkbox"/> | <a href="#">227</a> | 590.3051  | 1178.5956 |
| <input checked="" type="checkbox"/> | <a href="#">228</a> | 606.8477  | 1211.6808 |
| <input checked="" type="checkbox"/> | <a href="#">229</a> | 614.8415  | 1227.6684 |
| <input checked="" type="checkbox"/> | <a href="#">232</a> | 615.2973  | 1228.5800 |
| <input checked="" type="checkbox"/> | <a href="#">236</a> | 615.3125  | 1228.6104 |
| <input checked="" type="checkbox"/> | <a href="#">237</a> | 615.3173  | 1228.6200 |
| <input checked="" type="checkbox"/> | <a href="#">238</a> | 616.8066  | 1231.5986 |
| <input checked="" type="checkbox"/> | <a href="#">239</a> | 618.2707  | 1234.5268 |
| <input checked="" type="checkbox"/> | <a href="#">240</a> | 626.3076  | 1250.6006 |
| <input checked="" type="checkbox"/> | <a href="#">241</a> | 629.9429  | 1257.8712 |
| <input checked="" type="checkbox"/> | <a href="#">245</a> | 631.3045  | 1260.5944 |
| <input checked="" type="checkbox"/> | <a href="#">253</a> | 631.3146  | 1260.6146 |
| <input checked="" type="checkbox"/> | <a href="#">254</a> | 631.8029  | 1261.5912 |



|                                     |                     |           |           |
|-------------------------------------|---------------------|-----------|-----------|
| <input checked="" type="checkbox"/> | <a href="#">256</a> | 631.8098  | 1261.6050 |
| <input checked="" type="checkbox"/> | <a href="#">257</a> | 632.3793  | 1262.7440 |
| <input checked="" type="checkbox"/> | <a href="#">260</a> | 1276.0366 | 1275.0293 |
| <input checked="" type="checkbox"/> | <a href="#">261</a> | 639.3495  | 1276.6844 |
| <input checked="" type="checkbox"/> | <a href="#">262</a> | 639.3512  | 1276.6878 |
| <input checked="" type="checkbox"/> | <a href="#">265</a> | 639.3650  | 1276.7154 |
| <input checked="" type="checkbox"/> | <a href="#">266</a> | 641.3467  | 1280.6788 |
| <input checked="" type="checkbox"/> | <a href="#">267</a> | 428.7611  | 1283.2615 |
| <input checked="" type="checkbox"/> | <a href="#">268</a> | 648.3688  | 1294.7230 |
| <input checked="" type="checkbox"/> | <a href="#">272</a> | 651.8669  | 1301.7192 |
| <input checked="" type="checkbox"/> | <a href="#">278</a> | 652.3638  | 1302.7130 |
| <input checked="" type="checkbox"/> | <a href="#">280</a> | 657.8510  | 1313.6874 |
| <input checked="" type="checkbox"/> | <a href="#">283</a> | 657.8622  | 1313.7098 |
| <input checked="" type="checkbox"/> | <a href="#">284</a> | 657.8630  | 1313.7114 |
| <input checked="" type="checkbox"/> | <a href="#">286</a> | 657.8670  | 1313.7194 |
| <input checked="" type="checkbox"/> | <a href="#">287</a> | 657.8687  | 1313.7228 |
| <input checked="" type="checkbox"/> | <a href="#">289</a> | 664.8458  | 1327.6770 |
| <input checked="" type="checkbox"/> | <a href="#">290</a> | 665.3529  | 1328.6912 |
| <input checked="" type="checkbox"/> | <a href="#">291</a> | 665.3602  | 1328.7058 |
| <input checked="" type="checkbox"/> | <a href="#">292</a> | 667.9150  | 1333.8154 |
| <input checked="" type="checkbox"/> | <a href="#">293</a> | 670.8458  | 1339.6770 |
| <input checked="" type="checkbox"/> | <a href="#">294</a> | 670.8692  | 1339.7238 |
| <input checked="" type="checkbox"/> | <a href="#">295</a> | 670.8762  | 1339.7378 |
| <input checked="" type="checkbox"/> | <a href="#">296</a> | 670.8839  | 1339.7532 |
| <input checked="" type="checkbox"/> | <a href="#">300</a> | 675.8537  | 1349.6928 |
| <input checked="" type="checkbox"/> | <a href="#">301</a> | 676.9324  | 1351.8502 |
| <input checked="" type="checkbox"/> | <a href="#">302</a> | 677.7803  | 1353.5460 |
| <input checked="" type="checkbox"/> | <a href="#">303</a> | 678.8408  | 1355.6670 |
| <input checked="" type="checkbox"/> | <a href="#">304</a> | 679.3489  | 1356.6832 |
| <input checked="" type="checkbox"/> | <a href="#">305</a> | 341.0215  | 1360.0569 |
| <input checked="" type="checkbox"/> | <a href="#">308</a> | 685.3792  | 1368.7438 |
| <input checked="" type="checkbox"/> | <a href="#">311</a> | 688.3701  | 1374.7256 |
| <input checked="" type="checkbox"/> | <a href="#">313</a> | 691.3355  | 1380.6564 |
| <input checked="" type="checkbox"/> | <a href="#">315</a> | 692.3530  | 1382.6914 |
| <input checked="" type="checkbox"/> | <a href="#">316</a> | 692.3760  | 1382.7374 |
| <input checked="" type="checkbox"/> | <a href="#">317</a> | 692.3795  | 1382.7444 |
| <input checked="" type="checkbox"/> | <a href="#">318</a> | 693.8282  | 1385.6418 |
| <input checked="" type="checkbox"/> | <a href="#">319</a> | 693.8896  | 1385.7646 |
| <input checked="" type="checkbox"/> | <a href="#">320</a> | 694.3635  | 1386.7124 |
| <input checked="" type="checkbox"/> | <a href="#">321</a> | 696.3606  | 1390.7066 |
| <input checked="" type="checkbox"/> | <a href="#">322</a> | 705.9033  | 1409.7920 |
| <input checked="" type="checkbox"/> | <a href="#">323</a> | 355.0473  | 1416.1601 |
| <input checked="" type="checkbox"/> | <a href="#">324</a> | 711.3118  | 1420.6090 |
| <input checked="" type="checkbox"/> | <a href="#">325</a> | 711.3287  | 1420.6428 |
| <input checked="" type="checkbox"/> | <a href="#">326</a> | 711.3327  | 1420.6508 |
| <input checked="" type="checkbox"/> | <a href="#">327</a> | 711.8225  | 1421.6304 |
| <input checked="" type="checkbox"/> | <a href="#">328</a> | 711.8459  | 1421.6772 |
| <input checked="" type="checkbox"/> | <a href="#">329</a> | 716.3568  | 1430.6990 |
| <input checked="" type="checkbox"/> | <a href="#">330</a> | 717.3319  | 1432.6492 |
| <input checked="" type="checkbox"/> | <a href="#">332</a> | 720.8417  | 1439.6688 |
| <input checked="" type="checkbox"/> | <a href="#">333</a> | 720.8440  | 1439.6734 |
| <input checked="" type="checkbox"/> | <a href="#">334</a> | 728.3522  | 1454.6898 |
| <input checked="" type="checkbox"/> | <a href="#">335</a> | 730.9031  | 1459.7916 |
| <input checked="" type="checkbox"/> | <a href="#">336</a> | 731.3462  | 1460.6778 |
| <input checked="" type="checkbox"/> | <a href="#">337</a> | 732.3721  | 1462.7296 |
| <input checked="" type="checkbox"/> | <a href="#">338</a> | 736.8455  | 1471.6764 |
| <input checked="" type="checkbox"/> | <a href="#">341</a> | 738.3699  | 1474.7252 |
| <input checked="" type="checkbox"/> | <a href="#">342</a> | 738.3713  | 1474.7280 |
| <input checked="" type="checkbox"/> | <a href="#">343</a> | 738.3729  | 1474.7312 |
| <input checked="" type="checkbox"/> | <a href="#">347</a> | 738.3795  | 1474.7444 |
| <input checked="" type="checkbox"/> | <a href="#">349</a> | 738.3814  | 1474.7482 |
| <input checked="" type="checkbox"/> | <a href="#">351</a> | 738.3840  | 1474.7534 |
| <input checked="" type="checkbox"/> | <a href="#">353</a> | 738.3912  | 1474.7678 |
| <input checked="" type="checkbox"/> | <a href="#">356</a> | 740.3666  | 1478.7186 |
| <input checked="" type="checkbox"/> | <a href="#">357</a> | 740.3692  | 1478.7238 |
| <input checked="" type="checkbox"/> | <a href="#">358</a> | 742.4603  | 1482.9060 |
| <input checked="" type="checkbox"/> | <a href="#">359</a> | 742.8790  | 1483.7434 |
| <input checked="" type="checkbox"/> | <a href="#">360</a> | 745.8330  | 1489.6514 |
| <input checked="" type="checkbox"/> | <a href="#">361</a> | 748.8511  | 1495.6876 |
| <input checked="" type="checkbox"/> | <a href="#">362</a> | 748.8543  | 1495.6940 |
| <input checked="" type="checkbox"/> | <a href="#">363</a> | 753.3779  | 1504.7412 |
| <input checked="" type="checkbox"/> | <a href="#">364</a> | 756.8419  | 1511.6692 |
| <input checked="" type="checkbox"/> | <a href="#">365</a> | 757.3382  | 1512.6618 |
| <input checked="" type="checkbox"/> | <a href="#">366</a> | 757.8568  | 1513.6990 |
| <input checked="" type="checkbox"/> | <a href="#">367</a> | 757.8580  | 1513.7014 |
| <input checked="" type="checkbox"/> | <a href="#">368</a> | 757.8599  | 1513.7052 |
| <input checked="" type="checkbox"/> | <a href="#">369</a> | 757.8612  | 1513.7078 |
| <input checked="" type="checkbox"/> | <a href="#">370</a> | 758.4351  | 1514.8556 |
| <input checked="" type="checkbox"/> | <a href="#">372</a> | 762.8272  | 1523.6398 |
| <input checked="" type="checkbox"/> | <a href="#">373</a> | 762.9028  | 1523.7910 |
| <input checked="" type="checkbox"/> | <a href="#">374</a> | 766.8405  | 1531.6664 |

|                                     |                     |           |           |
|-------------------------------------|---------------------|-----------|-----------|
| <input checked="" type="checkbox"/> | <a href="#">375</a> | 766.8597  | 1531.7048 |
| <input checked="" type="checkbox"/> | <a href="#">376</a> | 766.8657  | 1531.7168 |
| <input checked="" type="checkbox"/> | <a href="#">377</a> | 766.8687  | 1531.7228 |
| <input checked="" type="checkbox"/> | <a href="#">378</a> | 774.8998  | 1547.7850 |
| <input checked="" type="checkbox"/> | <a href="#">379</a> | 775.8703  | 1549.7260 |
| <input checked="" type="checkbox"/> | <a href="#">380</a> | 775.8704  | 1549.7262 |
| <input checked="" type="checkbox"/> | <a href="#">381</a> | 775.8705  | 1549.7264 |
| <input checked="" type="checkbox"/> | <a href="#">382</a> | 1550.7377 | 1549.7304 |
| <input checked="" type="checkbox"/> | <a href="#">383</a> | 775.8734  | 1549.7322 |
| <input checked="" type="checkbox"/> | <a href="#">384</a> | 775.8805  | 1549.7464 |
| <input checked="" type="checkbox"/> | <a href="#">385</a> | 785.3551  | 1568.6956 |
| <input checked="" type="checkbox"/> | <a href="#">386</a> | 785.8297  | 1569.6448 |
| <input checked="" type="checkbox"/> | <a href="#">387</a> | 785.8307  | 1569.6468 |
| <input checked="" type="checkbox"/> | <a href="#">388</a> | 785.8309  | 1569.6472 |
| <input checked="" type="checkbox"/> | <a href="#">389</a> | 785.8321  | 1569.6496 |
| <input checked="" type="checkbox"/> | <a href="#">390</a> | 785.8323  | 1569.6500 |
| <input checked="" type="checkbox"/> | <a href="#">391</a> | 785.8363  | 1569.6580 |
| <input checked="" type="checkbox"/> | <a href="#">392</a> | 785.8364  | 1569.6582 |
| <input checked="" type="checkbox"/> | <a href="#">393</a> | 785.8367  | 1569.6588 |
| <input checked="" type="checkbox"/> | <a href="#">394</a> | 785.8369  | 1569.6592 |
| <input checked="" type="checkbox"/> | <a href="#">395</a> | 785.8376  | 1569.6606 |
| <input checked="" type="checkbox"/> | <a href="#">397</a> | 785.8386  | 1569.6626 |
| <input checked="" type="checkbox"/> | <a href="#">399</a> | 785.8392  | 1569.6638 |
| <input checked="" type="checkbox"/> | <a href="#">400</a> | 785.8399  | 1569.6652 |
| <input checked="" type="checkbox"/> | <a href="#">401</a> | 785.8403  | 1569.6660 |
| <input checked="" type="checkbox"/> | <a href="#">402</a> | 785.8403  | 1569.6660 |
| <input checked="" type="checkbox"/> | <a href="#">403</a> | 785.8405  | 1569.6664 |
| <input checked="" type="checkbox"/> | <a href="#">404</a> | 785.8408  | 1569.6670 |
| <input checked="" type="checkbox"/> | <a href="#">405</a> | 785.8409  | 1569.6672 |
| <input checked="" type="checkbox"/> | <a href="#">406</a> | 785.8413  | 1569.6680 |
| <input checked="" type="checkbox"/> | <a href="#">407</a> | 785.8414  | 1569.6682 |
| <input checked="" type="checkbox"/> | <a href="#">408</a> | 785.8416  | 1569.6686 |
| <input checked="" type="checkbox"/> | <a href="#">409</a> | 785.8417  | 1569.6688 |
| <input checked="" type="checkbox"/> | <a href="#">410</a> | 785.8417  | 1569.6688 |
| <input checked="" type="checkbox"/> | <a href="#">411</a> | 785.8420  | 1569.6694 |
| <input checked="" type="checkbox"/> | <a href="#">412</a> | 785.8422  | 1569.6698 |
| <input checked="" type="checkbox"/> | <a href="#">413</a> | 785.8422  | 1569.6698 |
| <input checked="" type="checkbox"/> | <a href="#">414</a> | 785.8422  | 1569.6698 |
| <input checked="" type="checkbox"/> | <a href="#">415</a> | 785.8427  | 1569.6708 |
| <input checked="" type="checkbox"/> | <a href="#">416</a> | 785.8431  | 1569.6716 |
| <input checked="" type="checkbox"/> | <a href="#">417</a> | 785.8435  | 1569.6724 |
| <input checked="" type="checkbox"/> | <a href="#">418</a> | 785.8436  | 1569.6726 |
| <input checked="" type="checkbox"/> | <a href="#">419</a> | 785.8437  | 1569.6728 |
| <input checked="" type="checkbox"/> | <a href="#">421</a> | 785.8442  | 1569.6738 |
| <input checked="" type="checkbox"/> | <a href="#">423</a> | 785.8444  | 1569.6742 |
| <input checked="" type="checkbox"/> | <a href="#">424</a> | 785.8445  | 1569.6744 |
| <input checked="" type="checkbox"/> | <a href="#">425</a> | 785.8447  | 1569.6748 |
| <input checked="" type="checkbox"/> | <a href="#">426</a> | 785.8448  | 1569.6750 |
| <input checked="" type="checkbox"/> | <a href="#">427</a> | 785.8455  | 1569.6764 |
| <input checked="" type="checkbox"/> | <a href="#">428</a> | 785.8459  | 1569.6772 |
| <input checked="" type="checkbox"/> | <a href="#">429</a> | 785.8461  | 1569.6776 |
| <input checked="" type="checkbox"/> | <a href="#">430</a> | 785.8463  | 1569.6780 |
| <input checked="" type="checkbox"/> | <a href="#">431</a> | 785.8463  | 1569.6780 |
| <input checked="" type="checkbox"/> | <a href="#">432</a> | 785.8471  | 1569.6796 |
| <input checked="" type="checkbox"/> | <a href="#">433</a> | 785.8471  | 1569.6796 |
| <input checked="" type="checkbox"/> | <a href="#">434</a> | 785.8474  | 1569.6802 |
| <input checked="" type="checkbox"/> | <a href="#">435</a> | 785.8475  | 1569.6804 |
| <input checked="" type="checkbox"/> | <a href="#">436</a> | 785.8475  | 1569.6804 |
| <input checked="" type="checkbox"/> | <a href="#">437</a> | 785.8478  | 1569.6810 |
| <input checked="" type="checkbox"/> | <a href="#">438</a> | 785.8478  | 1569.6810 |
| <input checked="" type="checkbox"/> | <a href="#">439</a> | 785.8479  | 1569.6812 |
| <input checked="" type="checkbox"/> | <a href="#">440</a> | 785.8482  | 1569.6818 |
| <input checked="" type="checkbox"/> | <a href="#">441</a> | 785.8482  | 1569.6818 |
| <input checked="" type="checkbox"/> | <a href="#">442</a> | 785.8493  | 1569.6840 |
| <input checked="" type="checkbox"/> | <a href="#">443</a> | 785.8496  | 1569.6846 |
| <input checked="" type="checkbox"/> | <a href="#">444</a> | 785.8521  | 1569.6896 |
| <input checked="" type="checkbox"/> | <a href="#">445</a> | 785.8522  | 1569.6898 |
| <input checked="" type="checkbox"/> | <a href="#">446</a> | 785.8557  | 1569.6968 |
| <input checked="" type="checkbox"/> | <a href="#">447</a> | 786.8522  | 1571.6898 |
| <input checked="" type="checkbox"/> | <a href="#">448</a> | 786.8541  | 1571.6936 |
| <input checked="" type="checkbox"/> | <a href="#">449</a> | 786.8574  | 1571.7002 |
| <input checked="" type="checkbox"/> | <a href="#">450</a> | 788.7875  | 1575.5604 |
| <input checked="" type="checkbox"/> | <a href="#">451</a> | 794.8399  | 1587.6652 |
| <input checked="" type="checkbox"/> | <a href="#">452</a> | 794.8420  | 1587.6694 |
| <input checked="" type="checkbox"/> | <a href="#">453</a> | 794.8519  | 1587.6892 |
| <input checked="" type="checkbox"/> | <a href="#">454</a> | 794.8831  | 1587.7516 |
| <input checked="" type="checkbox"/> | <a href="#">455</a> | 795.8742  | 1589.7338 |
| <input checked="" type="checkbox"/> | <a href="#">457</a> | 795.8964  | 1589.7782 |
| <input checked="" type="checkbox"/> | <a href="#">458</a> | 796.3791  | 1590.7436 |
| <input checked="" type="checkbox"/> | <a href="#">459</a> | 801.4287  | 1600.8428 |
| <input checked="" type="checkbox"/> | <a href="#">461</a> | 801.4580  | 1600.9014 |

|                                     |                     |           |           |
|-------------------------------------|---------------------|-----------|-----------|
| <input checked="" type="checkbox"/> | <a href="#">463</a> | 801.9247  | 1601.8348 |
| <input checked="" type="checkbox"/> | <a href="#">464</a> | 801.9269  | 1601.8392 |
| <input checked="" type="checkbox"/> | <a href="#">465</a> | 801.9270  | 1601.8394 |
| <input checked="" type="checkbox"/> | <a href="#">466</a> | 802.8834  | 1603.7522 |
| <input checked="" type="checkbox"/> | <a href="#">468</a> | 802.8927  | 1603.7708 |
| <input checked="" type="checkbox"/> | <a href="#">469</a> | 805.8164  | 1609.6182 |
| <input checked="" type="checkbox"/> | <a href="#">471</a> | 808.3991  | 1614.7836 |
| <input checked="" type="checkbox"/> | <a href="#">474</a> | 809.8861  | 1617.7576 |
| <input checked="" type="checkbox"/> | <a href="#">476</a> | 809.8953  | 1617.7760 |
| <input checked="" type="checkbox"/> | <a href="#">477</a> | 809.8990  | 1617.7834 |
| <input checked="" type="checkbox"/> | <a href="#">479</a> | 810.8393  | 1619.6640 |
| <input checked="" type="checkbox"/> | <a href="#">480</a> | 810.8716  | 1619.7286 |
| <input checked="" type="checkbox"/> | <a href="#">484</a> | 810.8779  | 1619.7412 |
| <input checked="" type="checkbox"/> | <a href="#">486</a> | 810.8810  | 1619.7474 |
| <input checked="" type="checkbox"/> | <a href="#">493</a> | 816.8915  | 1631.7684 |
| <input checked="" type="checkbox"/> | <a href="#">514</a> | 816.8947  | 1631.7748 |
| <input checked="" type="checkbox"/> | <a href="#">521</a> | 816.8958  | 1631.7770 |
| <input checked="" type="checkbox"/> | <a href="#">536</a> | 832.6773  | 1663.3400 |
| <input checked="" type="checkbox"/> | <a href="#">537</a> | 834.4014  | 1666.7882 |
| <input checked="" type="checkbox"/> | <a href="#">538</a> | 844.8012  | 1687.5878 |
| <input checked="" type="checkbox"/> | <a href="#">539</a> | 850.9382  | 1699.8618 |
| <input checked="" type="checkbox"/> | <a href="#">540</a> | 851.4467  | 1700.8788 |
| <input checked="" type="checkbox"/> | <a href="#">541</a> | 851.4474  | 1700.8802 |
| <input checked="" type="checkbox"/> | <a href="#">544</a> | 851.4534  | 1700.8922 |
| <input checked="" type="checkbox"/> | <a href="#">545</a> | 851.4555  | 1700.8964 |
| <input checked="" type="checkbox"/> | <a href="#">547</a> | 851.4571  | 1700.8996 |
| <input checked="" type="checkbox"/> | <a href="#">548</a> | 851.4595  | 1700.9044 |
| <input checked="" type="checkbox"/> | <a href="#">551</a> | 851.4625  | 1700.9104 |
| <input checked="" type="checkbox"/> | <a href="#">554</a> | 851.4734  | 1700.9322 |
| <input checked="" type="checkbox"/> | <a href="#">555</a> | 852.4055  | 1702.7964 |
| <input checked="" type="checkbox"/> | <a href="#">556</a> | 854.3867  | 1706.7588 |
| <input checked="" type="checkbox"/> | <a href="#">557</a> | 854.4058  | 1706.7970 |
| <input checked="" type="checkbox"/> | <a href="#">558</a> | 428.8021  | 1711.1793 |
| <input checked="" type="checkbox"/> | <a href="#">559</a> | 858.4742  | 1714.9338 |
| <input checked="" type="checkbox"/> | <a href="#">560</a> | 890.4050  | 1778.7954 |
| <input checked="" type="checkbox"/> | <a href="#">561</a> | 890.4119  | 1778.8092 |
| <input checked="" type="checkbox"/> | <a href="#">562</a> | 890.4155  | 1778.8164 |
| <input checked="" type="checkbox"/> | <a href="#">563</a> | 892.7701  | 1783.5256 |
| <input checked="" type="checkbox"/> | <a href="#">565</a> | 894.4686  | 1786.9226 |
| <input checked="" type="checkbox"/> | <a href="#">568</a> | 896.3610  | 1790.7074 |
| <input checked="" type="checkbox"/> | <a href="#">569</a> | 896.3789  | 1790.7432 |
| <input checked="" type="checkbox"/> | <a href="#">572</a> | 897.9101  | 1793.8056 |
| <input checked="" type="checkbox"/> | <a href="#">575</a> | 905.9919  | 1809.9692 |
| <input checked="" type="checkbox"/> | <a href="#">576</a> | 906.0045  | 1809.9944 |
| <input checked="" type="checkbox"/> | <a href="#">578</a> | 906.5100  | 1811.0054 |
| <input checked="" type="checkbox"/> | <a href="#">579</a> | 908.4478  | 1814.8810 |
| <input checked="" type="checkbox"/> | <a href="#">580</a> | 914.9546  | 1827.8946 |
| <input checked="" type="checkbox"/> | <a href="#">581</a> | 915.4625  | 1828.9104 |
| <input checked="" type="checkbox"/> | <a href="#">582</a> | 915.4660  | 1828.9174 |
| <input checked="" type="checkbox"/> | <a href="#">583</a> | 915.4718  | 1828.9290 |
| <input checked="" type="checkbox"/> | <a href="#">584</a> | 616.3306  | 1845.9700 |
| <input checked="" type="checkbox"/> | <a href="#">585</a> | 924.9957  | 1847.9768 |
| <input checked="" type="checkbox"/> | <a href="#">586</a> | 954.7288  | 1907.4430 |
| <input checked="" type="checkbox"/> | <a href="#">587</a> | 956.0098  | 1910.0050 |
| <input checked="" type="checkbox"/> | <a href="#">588</a> | 973.5104  | 1945.0062 |
| <input checked="" type="checkbox"/> | <a href="#">591</a> | 671.3910  | 2011.1512 |
| <input checked="" type="checkbox"/> | <a href="#">592</a> | 1011.4334 | 2020.8522 |
| <input checked="" type="checkbox"/> | <a href="#">593</a> | 1024.5026 | 2046.9906 |
| <input checked="" type="checkbox"/> | <a href="#">594</a> | 1030.4009 | 2058.7872 |
| <input checked="" type="checkbox"/> | <a href="#">595</a> | 1040.9728 | 2079.9310 |
| <input checked="" type="checkbox"/> | <a href="#">596</a> | 694.3204  | 2079.9394 |
| <input checked="" type="checkbox"/> | <a href="#">597</a> | 1040.9795 | 2079.9444 |
| <input checked="" type="checkbox"/> | <a href="#">600</a> | 1040.9845 | 2079.9544 |
| <input checked="" type="checkbox"/> | <a href="#">601</a> | 1040.9870 | 2079.9594 |
| <input checked="" type="checkbox"/> | <a href="#">603</a> | 699.3636  | 2095.0690 |
| <input checked="" type="checkbox"/> | <a href="#">606</a> | 1056.9989 | 2111.9832 |
| <input checked="" type="checkbox"/> | <a href="#">608</a> | 1057.0073 | 2112.0000 |
| <input checked="" type="checkbox"/> | <a href="#">610</a> | 705.0086  | 2112.0040 |
| <input checked="" type="checkbox"/> | <a href="#">611</a> | 705.3356  | 2112.9850 |
| <input checked="" type="checkbox"/> | <a href="#">612</a> | 705.3407  | 2113.0003 |
| <input checked="" type="checkbox"/> | <a href="#">613</a> | 1057.5079 | 2113.0012 |
| <input checked="" type="checkbox"/> | <a href="#">615</a> | 706.3426  | 2116.0060 |
| <input checked="" type="checkbox"/> | <a href="#">616</a> | 707.0169  | 2118.0289 |
| <input checked="" type="checkbox"/> | <a href="#">619</a> | 707.3403  | 2118.9991 |
| <input checked="" type="checkbox"/> | <a href="#">620</a> | 709.3424  | 2125.0054 |
| <input checked="" type="checkbox"/> | <a href="#">621</a> | 709.3670  | 2125.0792 |
| <input checked="" type="checkbox"/> | <a href="#">624</a> | 715.3429  | 2143.0069 |
| <input checked="" type="checkbox"/> | <a href="#">628</a> | 1072.5261 | 2143.0376 |
| <input checked="" type="checkbox"/> | <a href="#">630</a> | 1072.5365 | 2143.0584 |
| <input checked="" type="checkbox"/> | <a href="#">631</a> | 1072.5383 | 2143.0620 |
| <input checked="" type="checkbox"/> | <a href="#">633</a> | 1073.0101 | 2144.0056 |

|                                     |                     |           |           |
|-------------------------------------|---------------------|-----------|-----------|
| <input checked="" type="checkbox"/> | <a href="#">634</a> | 715.6771  | 2144.0095 |
| <input checked="" type="checkbox"/> | <a href="#">635</a> | 715.6795  | 2144.0167 |
| <input checked="" type="checkbox"/> | <a href="#">637</a> | 1073.0237 | 2144.0328 |
| <input checked="" type="checkbox"/> | <a href="#">641</a> | 720.3670  | 2158.0792 |
| <input checked="" type="checkbox"/> | <a href="#">642</a> | 722.6668  | 2164.9786 |
| <input checked="" type="checkbox"/> | <a href="#">644</a> | 732.0351  | 2193.0835 |
| <input checked="" type="checkbox"/> | <a href="#">645</a> | 735.3560  | 2203.0462 |
| <input checked="" type="checkbox"/> | <a href="#">650</a> | 737.6997  | 2210.0773 |
| <input checked="" type="checkbox"/> | <a href="#">651</a> | 737.7006  | 2210.0800 |
| <input checked="" type="checkbox"/> | <a href="#">652</a> | 737.7010  | 2210.0812 |
| <input checked="" type="checkbox"/> | <a href="#">653</a> | 737.7034  | 2210.0884 |
| <input checked="" type="checkbox"/> | <a href="#">655</a> | 737.7103  | 2210.1091 |
| <input checked="" type="checkbox"/> | <a href="#">656</a> | 738.0344  | 2211.0814 |
| <input checked="" type="checkbox"/> | <a href="#">657</a> | 1108.0321 | 2214.0496 |
| <input checked="" type="checkbox"/> | <a href="#">658</a> | 744.0340  | 2229.0802 |
| <input checked="" type="checkbox"/> | <a href="#">659</a> | 761.3887  | 2281.1443 |
| <input checked="" type="checkbox"/> | <a href="#">660</a> | 761.7104  | 2282.1094 |
| <input checked="" type="checkbox"/> | <a href="#">661</a> | 762.0528  | 2283.1366 |
| <input checked="" type="checkbox"/> | <a href="#">662</a> | 762.0620  | 2283.1642 |
| <input checked="" type="checkbox"/> | <a href="#">664</a> | 767.3689  | 2299.0849 |
| <input checked="" type="checkbox"/> | <a href="#">665</a> | 767.3712  | 2299.0918 |
| <input checked="" type="checkbox"/> | <a href="#">666</a> | 767.3818  | 2299.1236 |
| <input checked="" type="checkbox"/> | <a href="#">667</a> | 768.0377  | 2301.0913 |
| <input checked="" type="checkbox"/> | <a href="#">669</a> | 779.0370  | 2334.0892 |
| <input checked="" type="checkbox"/> | <a href="#">672</a> | 779.7130  | 2336.1172 |
| <input checked="" type="checkbox"/> | <a href="#">673</a> | 780.0542  | 2337.1408 |
| <input checked="" type="checkbox"/> | <a href="#">676</a> | 1177.0771 | 2352.1396 |
| <input checked="" type="checkbox"/> | <a href="#">679</a> | 1177.0840 | 2352.1534 |
| <input checked="" type="checkbox"/> | <a href="#">684</a> | 792.3639  | 2374.0699 |
| <input checked="" type="checkbox"/> | <a href="#">685</a> | 792.7459  | 2375.2159 |
| <input checked="" type="checkbox"/> | <a href="#">686</a> | 800.3902  | 2398.1488 |
| <input checked="" type="checkbox"/> | <a href="#">687</a> | 803.7632  | 2408.2678 |
| <input checked="" type="checkbox"/> | <a href="#">689</a> | 821.3797  | 2461.1173 |
| <input checked="" type="checkbox"/> | <a href="#">690</a> | 834.4104  | 2500.2094 |
| <input checked="" type="checkbox"/> | <a href="#">691</a> | 834.4430  | 2500.3072 |
| <input checked="" type="checkbox"/> | <a href="#">692</a> | 838.4274  | 2512.2604 |
| <input checked="" type="checkbox"/> | <a href="#">693</a> | 858.4812  | 2572.4218 |
| <input checked="" type="checkbox"/> | <a href="#">694</a> | 888.7502  | 2663.2288 |
| <input checked="" type="checkbox"/> | <a href="#">696</a> | 888.7626  | 2663.2660 |
| <input checked="" type="checkbox"/> | <a href="#">698</a> | 1372.7352 | 2743.4558 |
| <input checked="" type="checkbox"/> | <a href="#">699</a> | 916.4213  | 2746.2421 |
| <input checked="" type="checkbox"/> | <a href="#">700</a> | 917.0810  | 2748.2212 |
| <input checked="" type="checkbox"/> | <a href="#">701</a> | 917.0811  | 2748.2215 |
| <input checked="" type="checkbox"/> | <a href="#">702</a> | 919.0511  | 2754.1315 |
| <input checked="" type="checkbox"/> | <a href="#">703</a> | 919.7774  | 2756.3104 |
| <input checked="" type="checkbox"/> | <a href="#">704</a> | 929.1258  | 2784.3556 |
| <input checked="" type="checkbox"/> | <a href="#">705</a> | 929.4644  | 2785.3714 |
| <input checked="" type="checkbox"/> | <a href="#">706</a> | 929.7783  | 2786.3131 |
| <input checked="" type="checkbox"/> | <a href="#">707</a> | 929.7839  | 2786.3299 |
| <input checked="" type="checkbox"/> | <a href="#">708</a> | 929.7928  | 2786.3566 |
| <input checked="" type="checkbox"/> | <a href="#">710</a> | 933.4380  | 2797.2922 |
| <input checked="" type="checkbox"/> | <a href="#">712</a> | 958.1219  | 2871.3439 |
| <input checked="" type="checkbox"/> | <a href="#">714</a> | 958.1293  | 2871.3661 |
| <input checked="" type="checkbox"/> | <a href="#">715</a> | 958.1404  | 2871.3994 |
| <input checked="" type="checkbox"/> | <a href="#">716</a> | 958.1454  | 2871.4144 |
| <input checked="" type="checkbox"/> | <a href="#">717</a> | 958.1537  | 2871.4393 |
| <input checked="" type="checkbox"/> | <a href="#">718</a> | 964.1164  | 2889.3274 |
| <input checked="" type="checkbox"/> | <a href="#">719</a> | 972.9012  | 2915.6818 |
| <input checked="" type="checkbox"/> | <a href="#">720</a> | 973.4361  | 2917.2865 |
| <input checked="" type="checkbox"/> | <a href="#">721</a> | 731.1655  | 2920.6329 |
| <input checked="" type="checkbox"/> | <a href="#">722</a> | 979.8508  | 2936.5306 |
| <input checked="" type="checkbox"/> | <a href="#">723</a> | 738.4187  | 2949.6457 |
| <input checked="" type="checkbox"/> | <a href="#">724</a> | 738.4551  | 2949.7913 |
| <input checked="" type="checkbox"/> | <a href="#">725</a> | 1005.4928 | 3013.4566 |
| <input checked="" type="checkbox"/> | <a href="#">726</a> | 1015.8009 | 3044.3809 |
| <input checked="" type="checkbox"/> | <a href="#">727</a> | 766.3745  | 3061.4689 |
| <input checked="" type="checkbox"/> | <a href="#">728</a> | 1026.1361 | 3075.3865 |
| <input checked="" type="checkbox"/> | <a href="#">730</a> | 793.2418  | 3168.9381 |
| <input checked="" type="checkbox"/> | <a href="#">731</a> | 1065.4698 | 3193.3876 |
| <input checked="" type="checkbox"/> | <a href="#">732</a> | 801.2135  | 3200.8249 |
| <input checked="" type="checkbox"/> | <a href="#">733</a> | 801.4345  | 3201.7089 |
| <input checked="" type="checkbox"/> | <a href="#">735</a> | 802.1821  | 3204.6993 |
| <input checked="" type="checkbox"/> | <a href="#">736</a> | 802.4299  | 3205.6905 |
| <input checked="" type="checkbox"/> | <a href="#">737</a> | 812.4256  | 3245.6733 |
| <input checked="" type="checkbox"/> | <a href="#">738</a> | 1087.5117 | 3259.5133 |
| <input checked="" type="checkbox"/> | <a href="#">739</a> | 838.3743  | 3349.4681 |
| <input checked="" type="checkbox"/> | <a href="#">742</a> | 851.4606  | 3401.8133 |
| <input checked="" type="checkbox"/> | <a href="#">743</a> | 854.1410  | 3412.5349 |
| <input checked="" type="checkbox"/> | <a href="#">744</a> | 1139.8470 | 3416.5192 |
| <input checked="" type="checkbox"/> | <a href="#">745</a> | 859.4880  | 3433.9229 |
| <input checked="" type="checkbox"/> | <a href="#">747</a> | 872.0906  | 3484.3333 |

|                                     |                     |           |           |
|-------------------------------------|---------------------|-----------|-----------|
| <input checked="" type="checkbox"/> | <a href="#">748</a> | 872.4459  | 3485.7545 |
| <input checked="" type="checkbox"/> | <a href="#">749</a> | 877.3615  | 3505.4169 |
| <input checked="" type="checkbox"/> | <a href="#">750</a> | 1172.2100 | 3513.6082 |
| <input checked="" type="checkbox"/> | <a href="#">751</a> | 882.1300  | 3524.4909 |
| <input checked="" type="checkbox"/> | <a href="#">752</a> | 888.2696  | 3549.0493 |
| <input checked="" type="checkbox"/> | <a href="#">753</a> | 891.4270  | 3561.6789 |
| <input checked="" type="checkbox"/> | <a href="#">755</a> | 1188.2625 | 3561.7657 |
| <input checked="" type="checkbox"/> | <a href="#">757</a> | 891.4513  | 3561.7761 |
| <input checked="" type="checkbox"/> | <a href="#">758</a> | 1188.2662 | 3561.7768 |
| <input checked="" type="checkbox"/> | <a href="#">763</a> | 896.4558  | 3581.7941 |
| <input checked="" type="checkbox"/> | <a href="#">765</a> | 906.2194  | 3620.8485 |
| <input checked="" type="checkbox"/> | <a href="#">766</a> | 911.6751  | 3642.6713 |
| <input checked="" type="checkbox"/> | <a href="#">767</a> | 915.6857  | 3658.7137 |
| <input checked="" type="checkbox"/> | <a href="#">768</a> | 929.2371  | 3712.9193 |
| <input checked="" type="checkbox"/> | <a href="#">769</a> | 933.8598  | 3731.4101 |
| <input checked="" type="checkbox"/> | <a href="#">770</a> | 939.4158  | 3753.6341 |
| <input checked="" type="checkbox"/> | <a href="#">771</a> | 943.0184  | 3768.0445 |
| <input checked="" type="checkbox"/> | <a href="#">772</a> | 958.7573  | 3831.0001 |
| <input checked="" type="checkbox"/> | <a href="#">773</a> | 967.6097  | 3866.4097 |
| <input checked="" type="checkbox"/> | <a href="#">774</a> | 1004.0294 | 4012.0885 |
| <input checked="" type="checkbox"/> | <a href="#">775</a> | 1011.5858 | 4042.3141 |
| <input checked="" type="checkbox"/> | <a href="#">777</a> | 1081.1510 | 4320.5749 |
| <input checked="" type="checkbox"/> | <a href="#">778</a> | 1085.1560 | 4336.5949 |
| <input checked="" type="checkbox"/> | <a href="#">779</a> | 1140.0453 | 4556.1521 |
| <input checked="" type="checkbox"/> | <a href="#">780</a> | 1143.4764 | 4569.8765 |
| <input checked="" type="checkbox"/> | <a href="#">781</a> | 1151.2518 | 4600.9781 |
| <input checked="" type="checkbox"/> | <a href="#">782</a> | 1192.8083 | 4767.2041 |
| <input checked="" type="checkbox"/> | <a href="#">783</a> | 1223.8950 | 4891.5509 |
| <input checked="" type="checkbox"/> | <a href="#">784</a> | 1262.2261 | 5044.8753 |
| <input checked="" type="checkbox"/> | <a href="#">785</a> | 1280.1780 | 5116.6829 |
| <input checked="" type="checkbox"/> | <a href="#">786</a> | 1385.7402 | 5538.9317 |

#### Search Parameters

Type of search : MS/MS Ion Search  
Enzyme : Trypsin  
Fixed modifications : Carbamidomethyl (C)  
Variable modifications : Oxidation (M)  
Mass values : Monoisotopic  
Protein Mass : Unrestricted  
Peptide Mass Tolerance :  $\pm 50$  ppm  
Fragment Mass Tolerance:  $\pm 0.2$  Da  
Max Missed Cleavages : 1  
Instrument type : ESI-QUAD-TOF  
Number of queries : 786

Mascot: <http://www.matrixscience.com/>

# Mascot Search Results

**User** : Dominic  
**Email** : dominic.kurian@bbsrc.ac.uk  
**Search title** : IPI Mouse\_15-02-2010  
**MS data file** : D:\Peaklist\Dominic Kurian\QToF\DK20010807 GATC P 0010885.pkl  
**Database** : IPI\_mouse MOUSE\_v3\_79 (54943 sequences; 24917557 residues)  
**Timestamp** : 15 Feb 2011 at 16:07:35 GMT  
**Protein hits** : [IPI00420725](#) Tax\_Id=10090 Gene\_Symbol=Camk2a Uncharacterized protein  
[IPI00755181](#) Tax\_Id=10090 Gene\_Symbol=Krt10 keratin, type I cytoskeletal 10  
[IPI00131366](#) Tax\_Id=10090 Gene\_Symbol=Krt6b Keratin, type II cytoskeletal 6B  
[IPI00348328](#) Tax\_Id=10090 Gene\_Symbol=Krt78 keratin Kb40  
[IPI00322209](#) Tax\_Id=10090 Gene\_Symbol=Krt8 Keratin, type II cytoskeletal 8  
[IPI00347110](#) Tax\_Id=10090 Gene\_Symbol=Krt73 Keratin, type II cytoskeletal 73

## IPI\_mouse [Decoy](#) False discovery rate

Peptide matches above identity threshold 18 0 0.00 %  
 Peptide matches above homology or identity threshold 22 0 0.00 %

## Probability Based Mowse Score

Ions score is  $-10 \cdot \log(P)$ , where P is the probability that the observed match is a random event.  
 Individual ions scores > 37 indicate identity or extensive homology ( $p < 0.01$ ).  
 Protein scores are derived from ions scores as a non-probabilistic basis for ranking protein hits.

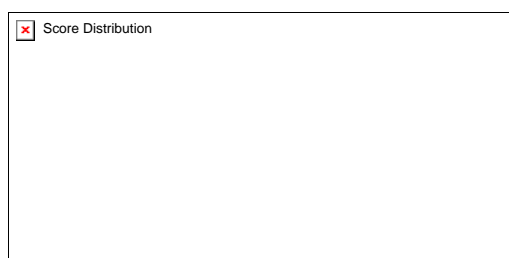

## Peptide Summary Report

Format As Peptide Summary [Help](#)  
 Significance threshold  $p < 0.01$  Max. number of hits AUTO  
 Standard scoring  MudPIT scoring  Ions score or expect cut-off 0 Show sub-sets 0  
 Show pop-ups  Suppress pop-ups  Sort unassigned Decreasing Score Require bold red   
    Error tolerant

1. [IPI00420725](#) Mass: 55882 Score: 276 Queries matched: 24 emPAI: 0.12  
 Tax\_Id=10090 Gene\_Symbol=Camk2a Uncharacterized protein  
 Check to include this hit in error tolerant search or archive report

| Query                                   | Observed | Mr(expt)  | Mr(calc)  | ppm    | Miss | Score | Expect   | Rank | Peptide           |
|-----------------------------------------|----------|-----------|-----------|--------|------|-------|----------|------|-------------------|
| <input checked="" type="checkbox"/> 196 | 574.3283 | 1146.6420 | 1146.6431 | -0.89  | 0    | (1)   | 44       | 1    | K.GAILTTMLATR.N   |
| <input checked="" type="checkbox"/> 197 | 574.3286 | 1146.6426 | 1146.6431 | -0.36  | 0    | 23    | 0.26     | 1    | K.GAILTTMLATR.N   |
| <input checked="" type="checkbox"/> 198 | 574.3295 | 1146.6444 | 1146.6431 | 1.21   | 0    | (2)   | 35       | 3    | K.GAILTTMLATR.N   |
| <input checked="" type="checkbox"/> 268 | 631.3032 | 1260.5918 | 1260.5927 | -0.71  | 0    | (8)   | 10       | 1    | R.FYFENLWSR.N     |
| <input checked="" type="checkbox"/> 270 | 631.3068 | 1260.5990 | 1260.5927 | 5.00   | 0    | 38    | 0.01     | 1    | R.FYFENLWSR.N     |
| <input checked="" type="checkbox"/> 301 | 652.3496 | 1302.6846 | 1302.6932 | -6.56  | 0    | (12)  | 4.6      | 1    | R.ITQYLDAGGIPR.T  |
| <input checked="" type="checkbox"/> 302 | 652.3525 | 1302.6904 | 1302.6932 | -2.11  | 0    | 18    | 1.3      | 1    | R.ITQYLDAGGIPR.T  |
| <input checked="" type="checkbox"/> 493 | 816.8842 | 1631.7538 | 1631.7719 | -11.05 | 0    | (55)  | 0.00019  | 1    | R.FTEEYQLFEELGK.G |
| <input checked="" type="checkbox"/> 496 | 816.8906 | 1631.7666 | 1631.7719 | -3.21  | 0    | (16)  | 1.5      | 1    | R.FTEEYQLFEELGK.G |
| <input checked="" type="checkbox"/> 497 | 816.8911 | 1631.7676 | 1631.7719 | -2.59  | 0    | (56)  | 0.00014  | 1    | R.FTEEYQLFEELGK.G |
| <input checked="" type="checkbox"/> 498 | 816.8913 | 1631.7680 | 1631.7719 | -2.35  | 0    | (51)  | 0.00053  | 1    | R.FTEEYQLFEELGK.G |
| <input checked="" type="checkbox"/> 500 | 816.8914 | 1631.7682 | 1631.7719 | -2.23  | 0    | (55)  | 0.00019  | 1    | R.FTEEYQLFEELGK.G |
| <input checked="" type="checkbox"/> 501 | 816.8923 | 1631.7700 | 1631.7719 | -1.12  | 0    | 72    | 4e-006   | 1    | R.FTEEYQLFEELGK.G |
| <input checked="" type="checkbox"/> 502 | 816.8925 | 1631.7704 | 1631.7719 | -0.88  | 0    | (39)  | 0.0085   | 1    | R.FTEEYQLFEELGK.G |
| <input checked="" type="checkbox"/> 503 | 816.8937 | 1631.7728 | 1631.7719 | 0.59   | 0    | (30)  | 0.069    | 1    | R.FTEEYQLFEELGK.G |
| <input checked="" type="checkbox"/> 505 | 816.8957 | 1631.7768 | 1631.7719 | 3.04   | 0    | (57)  | 0.00013  | 1    | R.FTEEYQLFEELGK.G |
| <input checked="" type="checkbox"/> 507 | 816.8961 | 1631.7776 | 1631.7719 | 3.53   | 0    | (26)  | 0.16     | 1    | R.FTEEYQLFEELGK.G |
| <input checked="" type="checkbox"/> 508 | 816.8961 | 1631.7776 | 1631.7719 | 3.53   | 0    | (11)  | 5        | 1    | R.FTEEYQLFEELGK.G |
| <input checked="" type="checkbox"/> 511 | 816.8971 | 1631.7796 | 1631.7719 | 4.76   | 0    | (57)  | 0.00013  | 1    | R.FTEEYQLFEELGK.G |
| <input checked="" type="checkbox"/> 514 | 816.8975 | 1631.7804 | 1631.7719 | 5.25   | 0    | (26)  | 0.15     | 1    | R.FTEEYQLFEELGK.G |
| <input checked="" type="checkbox"/> 515 | 816.8981 | 1631.7816 | 1631.7719 | 5.99   | 0    | (48)  | 0.0011   | 1    | R.FTEEYQLFEELGK.G |
| <input checked="" type="checkbox"/> 518 | 816.8998 | 1631.7850 | 1631.7719 | 8.07   | 0    | (14)  | 2.9      | 1    | R.FTEEYQLFEELGK.G |
| <input checked="" type="checkbox"/> 519 | 816.9008 | 1631.7870 | 1631.7719 | 9.29   | 0    | (65)  | 1.9e-005 | 1    | R.FTEEYQLFEELGK.G |
| <input checked="" type="checkbox"/> 521 | 816.9054 | 1631.7962 | 1631.7719 | 14.9   | 0    | (10)  | 6.2      | 1    | R.FTEEYQLFEELGK.G |

Proteins matching the same set of peptides:

[IPI00621806](#) Mass: 54651 Score: 276 Queries matched: 24  
 Tax\_Id=10090 Gene\_Symbol=Cank2a Isoform Alpha CaMKII of Calcium/calmodulin-dependent protein kinase type II subunit alpha

2. [IPI00755181](#) Mass: 57178 Score: 79 Queries matched: 3 empAI: 0.12  
 Tax\_Id=10090 Gene\_Symbol=Krt10 keratin, type I cytoskeletal 10

Check to include this hit in error tolerant search or archive report

| Query                                                   | Observed | Mr(expt)  | Mr(calc)  | ppm   | Miss Score | Expect Rank | Peptide            |
|---------------------------------------------------------|----------|-----------|-----------|-------|------------|-------------|--------------------|
| <input checked="" type="checkbox"/> <a href="#">173</a> | 545.7680 | 1089.5214 | 1089.5237 | -2.05 | 0          | 68 1.2e-005 | 1 K.VTMQNLNDR.L    |
| <input checked="" type="checkbox"/> <a href="#">344</a> | 691.3235 | 1380.6324 | 1380.6408 | -6.08 | 0 (28)     | 0.083       | 1 R.ALEESNYELEGK.I |
| <input checked="" type="checkbox"/> <a href="#">345</a> | 691.3331 | 1380.6516 | 1380.6408 | 7.83  | 0          | 49 0.00069  | 1 R.ALEESNYELEGK.I |

Proteins matching the same set of peptides:

[IPI00798492](#) Mass: 57906 Score: 79 Queries matched: 3  
 Tax\_Id=10090 Gene\_Symbol=Krt10 Isoform 1 of Keratin, type I cytoskeletal 10  
[IPI00828744](#) Mass: 57197 Score: 79 Queries matched: 3  
 Tax\_Id=10090 Gene\_Symbol=Krt10 Isoform 2 of Keratin, type I cytoskeletal 10

3. [IPI00131366](#) Mass: 60627 Score: 70 Queries matched: 3 empAI: 0.05  
 Tax\_Id=10090 Gene\_Symbol=Krt6b Keratin, type II cytoskeletal 6B

Check to include this hit in error tolerant search or archive report

| Query                                                   | Observed | Mr(expt)  | Mr(calc)  | ppm   | Miss Score | Expect Rank | Peptide            |
|---------------------------------------------------------|----------|-----------|-----------|-------|------------|-------------|--------------------|
| <input checked="" type="checkbox"/> <a href="#">298</a> | 651.8590 | 1301.7034 | 1301.7078 | -3.36 | 0          | 54 0.00027  | 1 R.SLDLDSIIAEVK.A |
| <input checked="" type="checkbox"/> <a href="#">299</a> | 651.8593 | 1301.7040 | 1301.7078 | -2.90 | 0 (38)     | 0.0097      | 1 R.SLDLDSIIAEVK.A |
| <input checked="" type="checkbox"/> <a href="#">300</a> | 651.8599 | 1301.7052 | 1301.7078 | -1.98 | 0 (39)     | 0.0084      | 1 R.SLDLDSIIAEVK.A |

Proteins matching the same set of peptides:

[IPI00131368](#) Mass: 59641 Score: 70 Queries matched: 3  
 Tax\_Id=10090 Gene\_Symbol=Krt6a Keratin, type II cytoskeletal 6A  
[IPI00139301](#) Mass: 61957 Score: 70 Queries matched: 3  
 Tax\_Id=10090 Gene\_Symbol=Krt5 Keratin, type II cytoskeletal 5  
[IPI00221797](#) Mass: 59932 Score: 70 Queries matched: 3  
 Tax\_Id=10090 Gene\_Symbol=Krt75 Keratin, type II cytoskeletal 75  
[IPI00330480](#) Mass: 35315 Score: 70 Queries matched: 3  
 Tax\_Id=10090 Gene\_Symbol=- 35 kDa protein  
[IPI00470126](#) Mass: 60553 Score: 70 Queries matched: 3  
 Tax\_Id=10090 Gene\_Symbol=Krt5 Uncharacterized protein  
[IPI00762364](#) Mass: 50641 Score: 70 Queries matched: 3  
 Tax\_Id=10090 Gene\_Symbol=Krt6a Uncharacterized protein  
[IPI00785403](#) Mass: 59832 Score: 70 Queries matched: 3  
 Tax\_Id=10090 Gene\_Symbol=Krt6b keratin, type II cytoskeletal 6B

4. [IPI00348328](#) Mass: 114018 Score: 52 Queries matched: 2 empAI: 0.03  
 Tax\_Id=10090 Gene\_Symbol=Krt78 keratin Kb40

Check to include this hit in error tolerant search or archive report

| Query                                                   | Observed | Mr(expt)  | Mr(calc)  | ppm  | Miss Score | Expect Rank | Peptide           |
|---------------------------------------------------------|----------|-----------|-----------|------|------------|-------------|-------------------|
| <a href="#">160</a>                                     | 523.7686 | 1045.5226 | 1045.4975 | 24.1 | 0          | 14 4.1      | 2 R.GSGGQVTMPGR.G |
| <input checked="" type="checkbox"/> <a href="#">348</a> | 692.3519 | 1382.6892 | 1382.6830 | 4.51 | 0          | 52 0.00046  | 1 R.SLNQFASFIDK.V |

5. [IPI00322209](#) Mass: 54531 Score: 52 Queries matched: 1 empAI: 0.06  
 Tax\_Id=10090 Gene\_Symbol=Krt8 Keratin, type II cytoskeletal 8

Check to include this hit in error tolerant search or archive report

| Query               | Observed | Mr(expt)  | Mr(calc)  | ppm    | Miss Score | Expect Rank | Peptide            |
|---------------------|----------|-----------|-----------|--------|------------|-------------|--------------------|
| <a href="#">348</a> | 692.3519 | 1382.6892 | 1382.7194 | -21.80 | 1          | 52 0.00046  | 1 K.SLNKPFASFIDK.V |

6. [IPI00347110](#) Mass: 59502 Score: 46 Queries matched: 4 empAI: 0.06  
 Tax\_Id=10090 Gene\_Symbol=Krt73 Keratin, type II cytoskeletal 73

Check to include this hit in error tolerant search or archive report

| Query                                                   | Observed | Mr(expt)  | Mr(calc)  | ppm    | Miss Score | Expect Rank | Peptide            |
|---------------------------------------------------------|----------|-----------|-----------|--------|------------|-------------|--------------------|
| <input checked="" type="checkbox"/> <a href="#">281</a> | 639.3522 | 1276.6898 | 1276.7027 | -10.04 | 0 (18)     | 1.1         | 1 K.LALDIEIATYR.K  |
| <input checked="" type="checkbox"/> <a href="#">282</a> | 639.3556 | 1276.6966 | 1276.7027 | -4.71  | 0          | 20 0.72     | 1 K.LALDIEIATYR.K  |
| <input checked="" type="checkbox"/> <a href="#">284</a> | 639.3583 | 1276.7020 | 1276.7027 | -0.48  | 0 (19)     | 0.73        | 1 K.LALDIEIATYR.K  |
| <input checked="" type="checkbox"/> <a href="#">401</a> | 738.3970 | 1474.7794 | 1474.7780 | 0.99   | 0          | 46 0.0016   | 1 R.FLEQQQVQLQTK.W |

Peptide matches not assigned to protein hits: (no details means no match)

| Query                                                   | Observed | Mr(expt)  | Mr(calc)  | ppm   | Miss Score | Expect Rank | Peptide        |
|---------------------------------------------------------|----------|-----------|-----------|-------|------------|-------------|----------------|
| <input checked="" type="checkbox"/> <a href="#">240</a> | 614.8435 | 1227.6724 | 1227.6711 | 1.13  | 0          | 36 0.019    | 1 TSGPPVSELITK |
| <input checked="" type="checkbox"/> <a href="#">157</a> | 523.2830 | 1044.5514 | 1044.5564 | -4.69 | 0          | 32 0.058    | 1 INDITLNSR    |
| <input checked="" type="checkbox"/> <a href="#">156</a> | 523.2830 | 1044.5514 | 1044.5564 | -4.69 | 0          | 30 0.098    | 1 INDITLNSR    |
| <input checked="" type="checkbox"/> <a href="#">155</a> | 523.2829 | 1044.5512 | 1044.5564 | -4.89 | 0          | 30 0.1      | 1 INDITLNSR    |
| <input checked="" type="checkbox"/> <a href="#">103</a> | 421.7574 | 841.5002  | 841.4810  | 22.9  | 0          | 27 0.11     | 1 LGTWLPR      |
| <input checked="" type="checkbox"/> <a href="#">109</a> | 428.7642 | 855.5138  | 855.4814  | 37.9  | 0          | 24 0.22     | 1 LGAETLPR     |
| <input checked="" type="checkbox"/> <a href="#">102</a> | 421.7571 | 841.4996  | 841.4810  | 22.1  | 0          | 20 0.5      | 1 LGTWLPR      |

|     |          |           |           |        |   |    |      |   |                                 |
|-----|----------|-----------|-----------|--------|---|----|------|---|---------------------------------|
| 170 | 533.2635 | 1064.5124 | 1064.5138 | -1.28  | 0 | 20 | 0.68 | 1 | AQYEDIAQK                       |
| 534 | 851.4528 | 1700.8910 | 1700.8985 | -4.39  | 0 | 20 | 0.64 | 1 | AVFVBLEPTVIDEVR                 |
| 104 | 423.2249 | 844.4352  | 844.4515  | -19.22 | 1 | 19 | 1.7  | 1 | AIRENSR                         |
| 67  | 741.4396 | 740.4323  | 740.4657  | -45.07 | 1 | 19 | 0.54 | 1 | RLVTPR                          |
| 245 | 616.3294 | 1230.6442 | 1230.6456 | -1.06  | 0 | 18 | 1.4  | 1 | ASQEVQEILSK                     |
| 248 | 616.7965 | 1231.5784 | 1231.5621 | 13.2   | 0 | 18 | 0.95 | 1 | IANEWEWR                        |
| 100 | 421.7558 | 841.4970  | 841.4810  | 19.0   | 0 | 18 | 0.9  | 1 | LGTWLP                          |
| 391 | 738.3775 | 1474.7404 | 1474.6731 | 45.7   | 0 | 18 | 1.3  | 1 | MIHTGEKPCVCK + Oxidation (M)    |
| 229 | 601.8072 | 1201.5998 | 1201.6302 | -25.30 | 1 | 17 | 1.6  | 1 | LGSEGVVEVKR                     |
| 91  | 412.7550 | 823.4954  | 823.5028  | -8.94  | 1 | 17 | 0.55 | 1 | VPSRLPR                         |
| 378 | 730.8994 | 1459.7842 | 1459.7592 | 17.2   | 1 | 17 | 1.3  | 1 | DVLEKMELLDQK                    |
| 86  | 407.2395 | 812.4644  | 812.4756  | -13.69 | 1 | 17 | 1.1  | 1 | AGPKALEK                        |
| 243 | 615.3023 | 1228.5900 | 1228.6241 | -27.69 | 0 | 16 | 1.4  | 1 | AVPPHETFGFK                     |
| 160 | 523.7686 | 1045.5226 | 1045.5597 | -35.42 | 1 | 16 | 2.4  | 1 | SGKVFVFSFK                      |
| 436 | 785.8358 | 1569.6570 | 1569.7245 | -43.00 | 0 | 16 | 0.52 | 1 | MSLAESAQYVHR + Oxidation (M)    |
| 130 | 485.7459 | 969.4772  | 969.4563  | 21.6   | 1 | 16 | 1.5  | 1 | HCRDQVR                         |
| 376 | 730.8926 | 1459.7706 | 1459.7453 | 17.4   | 1 | 16 | 1.9  | 1 | VDILENRVMDTR                    |
| 566 | 894.4688 | 1786.9230 | 1786.9070 | 9.00   | 0 | 15 | 1.9  | 1 | LVCSESEPITCKPQLR                |
| 373 | 728.8590 | 1455.7034 | 1455.7569 | -36.71 | 0 | 15 | 2.1  | 1 | ALALLEDEEQAVR                   |
| 99  | 421.7558 | 841.4970  | 841.4810  | 19.0   | 0 | 14 | 2.1  | 1 | AVLTWPR                         |
| 110 | 428.7671 | 855.5196  | 855.5112  | 9.82   | 1 | 14 | 1.8  | 1 | ALRMLPR                         |
| 158 | 523.2841 | 1044.5536 | 1044.5564 | -2.59  | 0 | 14 | 3.7  | 1 | INDITLNSR                       |
| 79  | 785.3552 | 784.3479  | 784.3868  | -49.54 | 1 | 14 | 1.1  | 1 | KDYGFR                          |
| 149 | 517.7773 | 1033.5400 | 1033.5192 | 20.1   | 0 | 14 | 3.9  | 1 | LLEFQNDR                        |
| 175 | 546.7536 | 1091.4926 | 1091.5393 | -42.77 | 1 | 14 | 2.2  | 1 | RDMQVNTTK                       |
| 601 | 705.0020 | 2111.9842 | 2112.0011 | -8.01  | 0 | 14 | 1.9  | 1 | TTEQLIEAVNNGDPEAYAK             |
| 223 | 594.3091 | 1186.6036 | 1186.6492 | -38.39 | 1 | 14 | 3.7  | 1 | MSRAPEILVR + Oxidation (M)      |
| 241 | 614.8456 | 1227.6766 | 1227.6711 | 4.55   | 0 | 14 | 3    | 1 | TSGPPVSELITK                    |
| 63  | 363.2190 | 724.4234  | 724.4344  | -15.10 | 0 | 13 | 1.5  | 1 | RPLSPR                          |
| 88  | 412.7511 | 823.4876  | 823.4817  | 7.25   | 0 | 13 | 1.3  | 1 | RPWLPR                          |
| 254 | 618.2742 | 1234.5338 | 1234.5401 | -5.04  | 0 | 13 | 1.8  | 1 | NMSGNVHFEGK + Oxidation (M)     |
| 286 | 639.8024 | 1277.5902 | 1277.6265 | -28.39 | 0 | 13 | 2.9  | 1 | GTSDHWIGLHR                     |
| 313 | 665.3237 | 1328.6328 | 1328.5992 | 25.3   | 0 | 13 | 3.1  | 1 | GLMTIYEDEM                      |
| 316 | 665.3463 | 1328.6780 | 1328.6547 | 17.6   | 0 | 13 | 3.7  | 1 | CLPAGPSPEVFR                    |
| 327 | 670.8930 | 1339.7714 | 1339.7096 | 46.2   | 1 | 13 | 1.8  | 1 | LSVGGSDPPLKR                    |
| 258 | 624.8118 | 1247.6090 | 1247.6180 | -7.15  | 1 | 13 | 4    | 1 | KLDSTAGMPNSK                    |
| 154 | 523.2826 | 1044.5506 | 1044.5564 | -5.46  | 0 | 13 | 5    | 1 | INDITLNSR                       |
| 105 | 423.2271 | 844.4396  | 844.4654  | -30.50 | 1 | 13 | 6.6  | 1 | SPASKLDK                        |
| 115 | 435.7732 | 869.5318  | 869.5123  | 22.5   | 0 | 12 | 2.3  | 1 | VSLWLP                          |
| 90  | 412.7530 | 823.4914  | 823.4664  | 30.4   | 1 | 12 | 1.6  | 1 | RDIPPAR                         |
| 148 | 517.7643 | 1033.5140 | 1033.5040 | 9.72   | 0 | 12 | 5.8  | 1 | AVDLSSGETR                      |
| 224 | 595.3015 | 1188.5884 | 1188.6251 | -30.83 | 1 | 12 | 5.2  | 1 | EVPPQQAAYR                      |
| 320 | 665.3650 | 1328.7154 | 1328.6684 | 35.4   | 1 | 12 | 4.3  | 1 | IAVDQEGKDQAR                    |
| 535 | 851.4545 | 1700.8944 | 1700.8985 | -2.39  | 0 | 12 | 3.7  | 1 | AVFVBLEPTVIDEVR                 |
| 352 | 696.3466 | 1390.6786 | 1390.7279 | -35.39 | 0 | 12 | 4.9  | 1 | QFCLELNLAVK                     |
| 47  | 632.3531 | 631.3458  | 631.3289  | 26.8   | 0 | 12 | 14   | 1 | ETNLR                           |
| 393 | 738.3797 | 1474.7448 | 1474.7528 | -5.41  | 0 | 12 | 5.2  | 1 | SGAGSHATHELPAIK                 |
| 128 | 476.7454 | 951.4762  | 951.4960  | -20.78 | 1 | 11 | 5.5  | 1 | MVGQAFRK + Oxidation (M)        |
| 392 | 738.3784 | 1474.7422 | 1474.8065 | -43.56 | 1 | 11 | 5.6  | 1 | VESLLENMGIKVK + Oxidation (M)   |
| 72  | 379.7110 | 757.4074  | 757.3719  | 47.0   | 0 | 11 | 8.4  | 1 | SSPAGSPR                        |
| 159 | 523.3225 | 1044.6304 | 1044.5828 | 45.6   | 1 | 11 | 2.4  | 1 | AARLGSPFAR                      |
| 321 | 665.3677 | 1328.7208 | 1328.7187 | 1.60   | 0 | 11 | 4.9  | 1 | NLDLDSIIAEVK                    |
| 417 | 768.4241 | 1534.8336 | 1534.9096 | -49.51 | 1 | 11 | 3.9  | 1 | HFLGGLVPRVSVR                   |
| 267 | 630.8173 | 1259.6200 | 1259.6357 | -12.44 | 0 | 11 | 6.6  | 1 | AVEESITNLER                     |
| 73  | 763.4373 | 762.4300  | 762.4276  | 3.20   | 0 | 11 | 6.8  | 1 | LGAPDLK                         |
| 120 | 437.7486 | 873.4826  | 873.4807  | 2.18   | 0 | 11 | 8.5  | 1 | ATEDVLVK                        |
| 165 | 530.7841 | 1059.5536 | 1059.5383 | 14.5   | 1 | 11 | 8.9  | 1 | AQKMDPSGVK                      |
| 491 | 815.3732 | 1628.7318 | 1628.7214 | 6.39   | 0 | 11 | 3.3  | 1 | MGAPAEAGMAEYLFDK                |
| 172 | 545.2977 | 1088.5808 | 1088.5714 | 8.71   | 0 | 10 | 8.6  | 1 | VTDLQGLTK                       |
| 118 | 435.7745 | 869.5344  | 869.5123  | 25.5   | 0 | 10 | 3.7  | 1 | VSLWLP                          |
| 234 | 605.8242 | 1209.6338 | 1209.6466 | -10.52 | 1 | 10 | 7.1  | 1 | EPVEQPRVTR                      |
| 504 | 816.8955 | 1631.7764 | 1631.8242 | -29.27 | 0 | 10 | 6.2  | 1 | MHAINGFLFSLNLR + Oxidation (M)  |
| 309 | 659.3605 | 1316.7064 | 1316.7010 | 4.17   | 0 | 10 | 7.1  | 1 | IEMEVEVALLR + Oxidation (M)     |
| 198 | 574.3295 | 1146.6444 | 1146.6649 | -17.80 | 0 | 10 | 5.7  | 1 | AVALDGTFLFK                     |
| 145 | 517.2630 | 1032.5114 | 1032.5273 | -15.40 | 1 | 10 | 9    | 1 | KEQEQMLK                        |
| 127 | 475.2524 | 948.4902  | 948.5280  | -39.80 | 0 | 10 | 9    | 1 | NYLELVAK                        |
| 98  | 421.7497 | 841.4848  | 841.4844  | 0.58   | 0 | 9  | 6.4  | 1 | AAPMLIAR                        |
| 388 | 738.3769 | 1474.7392 | 1474.6949 | 30.1   | 1 | 9  | 9.3  | 1 | QMNSFQVAFMK + 2 Oxidation (M)   |
| 418 | 772.8556 | 1543.6966 | 1543.6395 | 37.0   | 0 | 9  | 5.1  | 1 | CSNSADMTGSPFVR + Oxidation (M)  |
| 577 | 901.4461 | 1800.8776 | 1800.8328 | 24.9   | 0 | 9  | 8.5  | 1 | LYGWTMEPVFCQR + Oxidation (M)   |
| 150 | 519.2672 | 1036.5198 | 1036.5077 | 11.7   | 0 | 9  | 10   | 1 | EFDGTEVLK                       |
| 565 | 894.4647 | 1786.9148 | 1786.9764 | -34.43 | 1 | 9  | 9    | 1 | IAPFNLVVMVVDGNR + Oxidation (M) |
| 274 | 632.3272 | 1262.6398 | 1262.6441 | -3.40  | 1 | 9  | 11   | 1 | NVTIECPFKR                      |
| 57  | 692.3731 | 691.3658  | 691.3905  | -35.63 | 0 | 8  | 13   | 1 | ATYLPK                          |
| 89  | 412.7522 | 823.4898  | 823.5280  | -46.27 | 1 | 8  | 4    | 1 | TKILPPR                         |
| 557 | 883.9029 | 1765.7912 | 1765.7789 | 7.02   | 1 | 8  | 5.5  | 1 | KADSGEDSLGCLNGDTK               |
| 554 | 879.9472 | 1757.8798 | 1757.9060 | -14.89 | 1 | 8  | 9.3  | 1 | TEHAPSGKLEIQHPK                 |



|                     |           |           |           |        |   |   |     |   |                                                |
|---------------------|-----------|-----------|-----------|--------|---|---|-----|---|------------------------------------------------|
| <a href="#">528</a> | 832.3854  | 1662.7562 | 1662.8366 | -48.31 | 0 | 8 | 7.8 | 1 | FVTLQIWDTAGQER                                 |
| <a href="#">179</a> | 554.2792  | 1106.5438 | 1106.5940 | -45.33 | 1 | 8 | 13  | 1 | ALCMTLVKR + Oxidation (M)                      |
| <a href="#">580</a> | 913.9105  | 1825.8064 | 1825.8298 | -12.82 | 0 | 8 | 5.5 | 1 | EGSVGGSQVAALMMSSQR + 2 Oxidation (M)           |
| <a href="#">375</a> | 730.8780  | 1459.7414 | 1459.7042 | 25.5   | 0 | 8 | 12  | 1 | GVSEPLELTDGDK                                  |
| <a href="#">424</a> | 776.8488  | 1551.6830 | 1551.7199 | -23.73 | 1 | 8 | 6.3 | 1 | CKQLESTQTESNK                                  |
| <a href="#">632</a> | 758.4205  | 2272.2397 | 2272.1311 | 47.8   | 1 | 8 | 4.3 | 1 | GFGFVTFMDQAGVDKVLQSR                           |
| <a href="#">371</a> | 727.8940  | 1453.7734 | 1453.7776 | -2.89  | 0 | 8 | 10  | 1 | ISDAVAALDPVDLR                                 |
| <a href="#">53</a>  | 327.7028  | 653.3910  | 653.3609  | 46.2   | 0 | 8 | 5.1 | 1 | SAIAHR                                         |
| <a href="#">399</a> | 738.3895  | 1474.7644 | 1474.6948 | 47.2   | 1 | 7 | 12  | 1 | WMVAGKADPEMPK + Oxidation (M)                  |
| <a href="#">146</a> | 517.2634  | 1032.5122 | 1032.4724 | 38.6   | 0 | 7 | 16  | 1 | VLDEEGSER                                      |
| <a href="#">273</a> | 631.8104  | 1261.6062 | 1261.6150 | -6.91  | 1 | 7 | 14  | 1 | EASESQNLEKK                                    |
| <a href="#">453</a> | 785.8453  | 1569.6760 | 1569.7497 | -46.93 | 1 | 7 | 5.7 | 1 | GEMFVLEKGEYPR + Oxidation (M)                  |
| <a href="#">676</a> | 753.4116  | 3009.6173 | 3009.6136 | 1.21   | 1 | 7 | 4.3 | 1 | YLEYLFVDVELAPPTLVLTQMEKILR + Oxidation (M)     |
| <a href="#">215</a> | 590.7988  | 1179.5830 | 1179.6111 | -23.74 | 0 | 7 | 16  | 1 | TYVCHILFK                                      |
| <a href="#">361</a> | 714.3387  | 1426.6628 | 1426.7173 | -38.19 | 1 | 7 | 10  | 1 | CAPCRGNGVFPVLK                                 |
| <a href="#">147</a> | 517.2635  | 1032.5124 | 1032.4724 | 38.8   | 0 | 7 | 18  | 1 | VLDEEGSER                                      |
| <a href="#">307</a> | 659.3557  | 1316.6968 | 1316.6473 | 37.6   | 1 | 7 | 16  | 1 | DAREAGFALDPR                                   |
| <a href="#">247</a> | 616.3654  | 1230.7162 | 1230.7006 | 12.7   | 0 | 7 | 7.4 | 1 | QSVVVMGSLAK                                    |
| <a href="#">484</a> | 801.9233  | 1601.8320 | 1601.8534 | -13.34 | 1 | 7 | 14  | 1 | MPLVHMSFLSIRR + Oxidation (M)                  |
| <a href="#">624</a> | 737.7004  | 2210.0794 | 2210.0585 | 9.43   | 1 | 7 | 11  | 1 | IITQNALHRAPHYNSCCR                             |
| <a href="#">117</a> | 435.7735  | 869.5324  | 869.4971  | 40.7   | 0 | 7 | 8.7 | 1 | AVVESLPR                                       |
| <a href="#">595</a> | 693.9965  | 2078.9677 | 2078.9700 | -1.11  | 1 | 6 | 10  | 1 | MQQHCDLMLNLLKTFR + Oxidation (M)               |
| <a href="#">526</a> | 824.3863  | 1646.7580 | 1646.7747 | -10.12 | 1 | 6 | 13  | 1 | ARLGEASDSELAADAK                               |
| <a href="#">71</a>  | 379.7092  | 757.4038  | 757.4082  | -5.81  | 1 | 6 | 21  | 1 | DKGVPSR                                        |
| <a href="#">45</a>  | 619.2937  | 618.2864  | 618.2973  | -17.57 | 0 | 6 | 19  | 1 | IEDSR                                          |
| <a href="#">555</a> | 879.9559  | 1757.8972 | 1757.8916 | 3.19   | 1 | 6 | 16  | 1 | QPCILLMDSLRLGPSR + Oxidation (M)               |
| <a href="#">385</a> | 738.3738  | 1474.7330 | 1474.7780 | -30.45 | 0 | 6 | 19  | 1 | SYLRPITEAPSNK                                  |
| <a href="#">354</a> | 701.8492  | 1401.6838 | 1401.6783 | 3.97   | 1 | 6 | 17  | 1 | TRPPKEQSSGCR                                   |
| <a href="#">116</a> | 435.7733  | 869.5320  | 869.5222  | 11.3   | 0 | 6 | 11  | 1 | VTLEALPK                                       |
| <a href="#">397</a> | 738.3874  | 1474.7602 | 1474.7524 | 5.34   | 0 | 6 | 20  | 1 | LPAAGVGMVMATVK + Oxidation (M)                 |
| <a href="#">261</a> | 625.3146  | 1248.6146 | 1248.5809 | 27.1   | 0 | 6 | 23  | 1 | EGEWQTMIOK                                     |
| <a href="#">607</a> | 707.3361  | 2118.9865 | 2119.0629 | -36.04 | 1 | 6 | 13  | 1 | CMGPVMVGLRPLTDVVSQF                            |
| <a href="#">144</a> | 516.3068  | 1030.5990 | 1030.5811 | 17.4   | 1 | 5 | 15  | 1 | AKWLSVAEK                                      |
| <a href="#">477</a> | 795.8834  | 1589.7522 | 1589.8096 | -36.08 | 1 | 5 | 17  | 1 | SAAGLSMARAVSWQR                                |
| <a href="#">279</a> | 639.3420  | 1276.6694 | 1276.6598 | 7.55   | 0 | 5 | 24  | 1 | VVVQNQLCFGK                                    |
| <a href="#">294</a> | 647.3664  | 1292.7182 | 1292.6976 | 16.0   | 0 | 5 | 14  | 1 | ISYEPITTLR                                     |
| <a href="#">444</a> | 785.8418  | 1569.6690 | 1569.6399 | 18.6   | 1 | 5 | 7.8 | 1 | MKTECDSEQGETR                                  |
| <a href="#">364</a> | 719.3223  | 1436.6300 | 1436.6783 | -33.60 | 0 | 5 | 12  | 1 | DNDSYINVQEIK                                   |
| <a href="#">571</a> | 897.9120  | 1793.8094 | 1793.8189 | -5.28  | 1 | 5 | 14  | 1 | MSGGGDDVVCTGWLK                                |
| <a href="#">351</a> | 692.3663  | 1382.7180 | 1382.7194 | -0.98  | 1 | 5 | 21  | 1 | RDIVFAASLYTQ                                   |
| <a href="#">479</a> | 795.8920  | 1589.7694 | 1589.8096 | -25.27 | 1 | 5 | 21  | 1 | SAAGLSMARAVSWQR                                |
| <a href="#">135</a> | 505.2794  | 1008.5442 | 1008.5716 | -27.11 | 1 | 5 | 20  | 1 | AKAHILNDK                                      |
| <a href="#">239</a> | 614.8431  | 1227.6716 | 1227.6625 | 7.43   | 1 | 5 | 24  | 1 | RWGHVTFVAR                                     |
| <a href="#">510</a> | 816.8969  | 1631.7792 | 1631.7205 | 36.0   | 0 | 5 | 23  | 1 | MMTTATSGNIMTTEK + Oxidation (M)                |
| <a href="#">277</a> | 633.3164  | 1264.6182 | 1264.6187 | -0.33  | 1 | 5 | 26  | 1 | DELEFEKEVK                                     |
| <a href="#">330</a> | 672.3507  | 1342.6868 | 1342.6915 | -3.46  | 0 | 5 | 27  | 1 | MPTGTTVPAGIGK                                  |
| <a href="#">271</a> | 631.8051  | 1261.5956 | 1261.5826 | 10.3   | 0 | 4 | 24  | 1 | EALVDWSGEK                                     |
| <a href="#">226</a> | 599.8269  | 1197.6392 | 1197.6183 | 17.5   | 0 | 4 | 23  | 1 | FLFTTGPHTK                                     |
| <a href="#">142</a> | 516.3029  | 1030.5912 | 1030.5519 | 38.2   | 1 | 4 | 25  | 1 | SARAAEAVTR                                     |
| <a href="#">169</a> | 533.2592  | 1064.5038 | 1064.4774 | 24.8   | 0 | 4 | 26  | 1 | DDVAQENFK                                      |
| <a href="#">360</a> | 711.3236  | 1420.6326 | 1420.6318 | 0.63   | 0 | 4 | 16  | 1 | LTGASSDVEEER                                   |
| <a href="#">591</a> | 1011.4652 | 2020.9158 | 2020.9459 | -14.85 | 0 | 4 | 13  | 1 | SMSQIYCIENAHGQLVR + Oxidation (M)              |
| <a href="#">342</a> | 688.3369  | 1374.6592 | 1374.6449 | 10.4   | 0 | 4 | 26  | 1 | EPGETIVEAMQR + Oxidation (M)                   |
| <a href="#">694</a> | 855.1420  | 3416.5389 | 3416.6612 | -35.79 | 1 | 4 | 8.7 | 1 | TTNEGLLYPNPAAQMLVGDSEFARHYFLGR + Oxidation (M) |
| <a href="#">94</a>  | 414.2219  | 826.4292  | 826.4661  | -44.57 | 0 | 4 | 22  | 1 | VAAPNLSR                                       |
| <a href="#">262</a> | 625.3168  | 1248.6190 | 1248.5809 | 30.6   | 0 | 4 | 32  | 1 | DDGMQIWAIAK + Oxidation (M)                    |
| <a href="#">572</a> | 897.9121  | 1793.8096 | 1793.7699 | 22.2   | 1 | 4 | 19  | 1 | MSYLKTTMEDEESSK + Oxidation (M)                |
| <a href="#">573</a> | 897.9143  | 1793.8140 | 1793.7699 | 24.6   | 1 | 4 | 20  | 1 | MSYLKTTMEDEESSK + Oxidation (M)                |
| <a href="#">466</a> | 785.8697  | 1569.7248 | 1569.7132 | 7.44   | 0 | 4 | 22  | 1 | EVQESQTQGSQGHR                                 |
| <a href="#">400</a> | 738.3921  | 1474.7696 | 1474.7991 | -19.95 | 1 | 4 | 29  | 1 | AIEAASSLSQAATK                                 |
| <a href="#">516</a> | 816.8981  | 1631.7816 | 1631.8301 | -29.68 | 1 | 4 | 29  | 1 | KVASGSAAGPSCSLK                                |
| <a href="#">517</a> | 816.8984  | 1631.7822 | 1631.7205 | 37.9   | 0 | 3 | 30  | 1 | MMTTATSGNIMTTEK + Oxidation (M)                |
| <a href="#">394</a> | 738.3853  | 1474.7560 | 1474.7528 | 2.19   | 0 | 3 | 34  | 1 | SGAGSHATHELPAIK                                |
| <a href="#">626</a> | 738.0252  | 2211.0538 | 2211.0379 | 7.20   | 0 | 3 | 23  | 1 | GITSFIQHPASTPCEEANPR                           |
| <a href="#">167</a> | 530.7861  | 1059.5576 | 1059.5358 | 20.7   | 0 | 3 | 50  | 1 | WPMLLNMR                                       |
| <a href="#">384</a> | 738.3727  | 1474.7308 | 1474.6737 | 38.7   | 0 | 3 | 36  | 1 | MFWNLMFPFTTR + 2 Oxidation (M)                 |
| <a href="#">638</a> | 786.3861  | 2356.1365 | 2356.0868 | 21.1   | 0 | 3 | 21  | 1 | EGQLYAMELQGFWMDIGQPK + Oxidation (M)           |
| <a href="#">570</a> | 897.9114  | 1793.8082 | 1793.7699 | 21.4   | 1 | 3 | 22  | 1 | MSYLKTTMEDEESSK + Oxidation (M)                |
| <a href="#">512</a> | 816.8972  | 1631.7798 | 1631.7865 | -4.07  | 1 | 3 | 32  | 1 | CNKEIYVVTESYK                                  |
| <a href="#">138</a> | 513.7487  | 1025.4828 | 1025.5142 | -30.53 | 0 | 3 | 31  | 1 | QPDPAEELR                                      |
| <a href="#">675</a> | 752.1354  | 3004.5125 | 3004.5943 | -27.24 | 1 | 3 | 16  | 1 | TFQTFALFLDRLLDGSPLPQEVVMSLSK                   |
| <a href="#">134</a> | 505.2752  | 1008.5358 | 1008.5127 | 22.9   | 0 | 3 | 34  | 1 | EYLESLOK                                       |
| <a href="#">21</a>  | 517.2652  | 516.2579  | 516.2656  | -14.89 | 0 | 3 | 45  | 1 | AGDVR                                          |
| <a href="#">644</a> | 801.7284  | 2402.1634 | 2402.1570 | 2.67   | 1 | 3 | 27  | 1 | SGLCIEANSRIMELDPNDGALK                         |
| <a href="#">576</a> | 901.4456  | 1800.8766 | 1800.8469 | 16.5   | 0 | 3 | 37  | 1 | LMPMFLVMVPMISR + 3 Oxidation (M)               |
| <a href="#">119</a> | 435.7748  | 869.5350  | 869.5123  | 26.1   | 0 | 2 | 22  | 1 | VSLWLPR                                        |
| <a href="#">199</a> | 574.3331  | 1146.6516 | 1146.6649 | -11.52 | 0 | 2 | 27  | 1 | VSATFLPTAIK                                    |

|   |                     |           |           |           |        |   |   |    |   |                                   |
|---|---------------------|-----------|-----------|-----------|--------|---|---|----|---|-----------------------------------|
| ✓ | <a href="#">218</a> | 590.8070  | 1179.5994 | 1179.5554 | 37.4   | 1 | 2 | 45 | 1 | AVTKENSEMR + Oxidation (M)        |
| ✓ | <a href="#">569</a> | 897.9113  | 1793.8080 | 1793.7672 | 22.8   | 1 | 2 | 26 | 1 | CDLNMQQEEEKAR + Oxidation (M)     |
| ✓ | <a href="#">525</a> | 824.3836  | 1646.7526 | 1646.8055 | -32.08 | 1 | 2 | 32 | 1 | GLRTLCCCLPIER                     |
| ✓ | <a href="#">276</a> | 632.3409  | 1262.6672 | 1262.7095 | -33.45 | 0 | 2 | 44 | 1 | SRPPALEPGALR                      |
| ✓ | <a href="#">292</a> | 644.8557  | 1287.6968 | 1287.6459 | 39.6   | 1 | 2 | 42 | 1 | AVTVFVKHDDK                       |
| ✓ | <a href="#">210</a> | 587.3012  | 1172.5878 | 1172.6149 | -23.09 | 0 | 2 | 56 | 1 | LNQEVSQLSR                        |
| ✓ | <a href="#">405</a> | 747.8829  | 1493.7512 | 1493.6966 | 36.6   | 1 | 2 | 40 | 1 | NANNINMLKDGMK + 2 Oxidation (M)   |
| ✓ | <a href="#">356</a> | 707.3298  | 1412.6450 | 1412.7129 | -48.02 | 1 | 2 | 31 | 1 | CRPPRCDLLAR                       |
| ✓ | <a href="#">408</a> | 757.8497  | 1513.6848 | 1513.7307 | -30.29 | 1 | 2 | 30 | 1 | THEAQIQEMRQK + Oxidation (M)      |
| ✓ | <a href="#">471</a> | 1572.7390 | 1571.7317 | 1571.7171 | 9.30   | 1 | 2 | 38 | 1 | KMGEMQLSSVTDSK + 2 Oxidation (M)  |
| ✓ | <a href="#">415</a> | 766.8577  | 1531.7008 | 1531.7743 | -47.95 | 0 | 2 | 35 | 1 | EVQHALVHQESK                      |
| ✓ | <a href="#">140</a> | 514.2820  | 1026.5494 | 1026.5757 | -25.53 | 1 | 2 | 45 | 1 | RLMTLTHR                          |
| ✓ | <a href="#">153</a> | 523.2803  | 1044.5460 | 1044.5638 | -16.95 | 0 | 2 | 68 | 1 | VLEAPMTIR + Oxidation (M)         |
| ✓ | <a href="#">617</a> | 715.3487  | 2143.0243 | 2143.0831 | -27.44 | 1 | 1 | 36 | 1 | CPKVSATPDVSEASEGAVK               |
| ✓ | <a href="#">168</a> | 533.2479  | 1064.4812 | 1064.5219 | -38.18 | 1 | 1 | 37 | 1 | MAAQMVRSR + Oxidation (M)         |
| ✓ | <a href="#">93</a>  | 414.2217  | 826.4288  | 826.4661  | -45.05 | 0 | 1 | 40 | 1 | VAAPNLSR                          |
| ✓ | <a href="#">478</a> | 795.8888  | 1589.7630 | 1589.7475 | 9.81   | 0 | 1 | 47 | 1 | SGPLFSFDVHDDVR                    |
| ✓ | <a href="#">143</a> | 516.3063  | 1030.5980 | 1030.5546 | 42.1   | 0 | 1 | 40 | 1 | VDILDIDTK                         |
| ✓ | <a href="#">275</a> | 632.3361  | 1262.6576 | 1262.6579 | -0.17  | 1 | 1 | 54 | 1 | LSSTPTATSRSR                      |
| ✓ | <a href="#">372</a> | 727.8994  | 1453.7842 | 1453.8252 | -28.19 | 1 | 1 | 42 | 1 | ALELENDRLLLR                      |
| ✓ | <a href="#">544</a> | 859.4189  | 1716.8232 | 1716.8519 | -16.67 | 0 | 1 | 49 | 1 | CVVPGQAHQVTWHK                    |
| ✓ | <a href="#">428</a> | 781.3944  | 1560.7742 | 1560.7330 | 26.4   | 1 | 1 | 54 | 1 | VYSMRFCFPAQR                      |
| ✓ | <a href="#">410</a> | 757.8604  | 1513.7062 | 1513.6323 | 48.8   | 1 | 1 | 42 | 1 | MNSVGEACTDMKR + Oxidation (M)     |
| ✓ | <a href="#">64</a>  | 725.4449  | 724.4376  | 724.4020  | 49.1   | 1 | 1 | 23 | 1 | KQFFR                             |
| ✓ | <a href="#">166</a> | 530.7843  | 1059.5540 | 1059.5673 | -12.47 | 1 | 1 | 91 | 1 | KQEGIVGSSR                        |
| ✓ | <a href="#">256</a> | 618.3239  | 1234.6332 | 1234.5942 | 31.6   | 1 | 1 | 68 | 1 | QNGDRFIEEK                        |
| ✓ | <a href="#">139</a> | 514.2798  | 1026.5450 | 1026.5393 | 5.64   | 1 | 1 | 56 | 1 | VALRHMER + Oxidation (M)          |
| ✓ | <a href="#">152</a> | 519.2725  | 1036.5304 | 1036.5777 | -45.63 | 1 | 0 | 69 | 1 | QAAPREPLR                         |
| ✓ | <a href="#">666</a> | 958.1300  | 2871.3682 | 2871.3536 | 5.07   | 1 | 0 | 33 | 1 | DVFQRNQDGLSESPGWPAGTIR            |
| ✓ | <a href="#">568</a> | 897.9097  | 1793.8048 | 1793.8651 | -33.60 | 0 | 0 | 43 | 1 | LMAEALAMIESTQQR + 2 Oxidation (M) |
| ✓ | <a href="#">1</a>   | 341.0242  | 340.0169  |           |        |   |   |    |   |                                   |
| ✓ | <a href="#">2</a>   | 341.0275  | 340.0202  |           |        |   |   |    |   |                                   |
| ✓ | <a href="#">3</a>   | 342.2688  | 341.2615  |           |        |   |   |    |   |                                   |
| ✓ | <a href="#">4</a>   | 360.9891  | 359.9818  |           |        |   |   |    |   |                                   |
| ✓ | <a href="#">5</a>   | 416.2400  | 415.2327  |           |        |   |   |    |   |                                   |
| ✓ | <a href="#">6</a>   | 424.3148  | 423.3075  |           |        |   |   |    |   |                                   |
| ✓ | <a href="#">7</a>   | 429.0965  | 428.0892  |           |        |   |   |    |   |                                   |
| ✓ | <a href="#">8</a>   | 429.0978  | 428.0905  |           |        |   |   |    |   |                                   |
| ✓ | <a href="#">9</a>   | 430.2511  | 429.2438  |           |        |   |   |    |   |                                   |
| ✓ | <a href="#">10</a>  | 445.1122  | 444.1049  |           |        |   |   |    |   |                                   |
| ✓ | <a href="#">11</a>  | 445.1232  | 444.1159  |           |        |   |   |    |   |                                   |
| ✓ | <a href="#">12</a>  | 445.1351  | 444.1278  |           |        |   |   |    |   |                                   |
| ✓ | <a href="#">13</a>  | 451.1725  | 450.1652  |           |        |   |   |    |   |                                   |
| ✓ | <a href="#">14</a>  | 459.2731  | 458.2658  |           |        |   |   |    |   |                                   |
| ✓ | <a href="#">15</a>  | 469.1872  | 468.1799  |           |        |   |   |    |   |                                   |
| ✓ | <a href="#">16</a>  | 469.1905  | 468.1832  |           |        |   |   |    |   |                                   |
| ✓ | <a href="#">17</a>  | 470.2026  | 469.1953  |           |        |   |   |    |   |                                   |
| ✓ | <a href="#">18</a>  | 492.2361  | 491.2288  |           |        |   |   |    |   |                                   |
| ✓ | <a href="#">19</a>  | 503.0361  | 502.0288  |           |        |   |   |    |   |                                   |
| ✓ | <a href="#">20</a>  | 503.3152  | 502.3079  |           |        |   |   |    |   |                                   |
| ✓ | <a href="#">22</a>  | 521.0000  | 519.9927  |           |        |   |   |    |   |                                   |
| ✓ | <a href="#">23</a>  | 522.9882  | 521.9809  |           |        |   |   |    |   |                                   |
| ✓ | <a href="#">24</a>  | 533.2681  | 532.2608  |           |        |   |   |    |   |                                   |
| ✓ | <a href="#">25</a>  | 545.3068  | 544.2995  |           |        |   |   |    |   |                                   |
| ✓ | <a href="#">26</a>  | 549.0557  | 548.0484  |           |        |   |   |    |   |                                   |
| ✓ | <a href="#">27</a>  | 553.0099  | 552.0026  |           |        |   |   |    |   |                                   |
| ✓ | <a href="#">28</a>  | 558.7847  | 557.7774  |           |        |   |   |    |   |                                   |
| ✓ | <a href="#">29</a>  | 562.2796  | 561.2723  |           |        |   |   |    |   |                                   |
| ✓ | <a href="#">30</a>  | 565.0400  | 564.0327  |           |        |   |   |    |   |                                   |
| ✓ | <a href="#">31</a>  | 565.3137  | 564.3064  |           |        |   |   |    |   |                                   |
| ✓ | <a href="#">32</a>  | 572.3085  | 571.3012  |           |        |   |   |    |   |                                   |
| ✓ | <a href="#">33</a>  | 579.0262  | 578.0189  |           |        |   |   |    |   |                                   |
| ✓ | <a href="#">34</a>  | 579.2961  | 578.2888  |           |        |   |   |    |   |                                   |
| ✓ | <a href="#">35</a>  | 585.0348  | 584.0275  |           |        |   |   |    |   |                                   |
| ✓ | <a href="#">36</a>  | 585.0372  | 584.0299  |           |        |   |   |    |   |                                   |
| ✓ | <a href="#">37</a>  | 587.0353  | 586.0280  |           |        |   |   |    |   |                                   |
| ✓ | <a href="#">38</a>  | 590.3307  | 589.3234  |           |        |   |   |    |   |                                   |
| ✓ | <a href="#">39</a>  | 595.0097  | 594.0024  |           |        |   |   |    |   |                                   |
| ✓ | <a href="#">40</a>  | 595.2759  | 594.2686  |           |        |   |   |    |   |                                   |
| ✓ | <a href="#">41</a>  | 616.3271  | 615.3198  |           |        |   |   |    |   |                                   |
| ✓ | <a href="#">42</a>  | 616.3747  | 615.3674  |           |        |   |   |    |   |                                   |
| ✓ | <a href="#">43</a>  | 617.2840  | 616.2767  |           |        |   |   |    |   |                                   |
| ✓ | <a href="#">44</a>  | 617.3132  | 616.3059  |           |        |   |   |    |   |                                   |
| ✓ | <a href="#">46</a>  | 620.7597  | 619.7524  |           |        |   |   |    |   |                                   |
| ✓ | <a href="#">48</a>  | 632.3674  | 631.3601  |           |        |   |   |    |   |                                   |
| ✓ | <a href="#">49</a>  | 634.9940  | 633.9867  |           |        |   |   |    |   |                                   |
| ✓ | <a href="#">50</a>  | 638.3274  | 637.3201  |           |        |   |   |    |   |                                   |

|                                     |                     |           |           |
|-------------------------------------|---------------------|-----------|-----------|
| <input checked="" type="checkbox"/> | <a href="#">51</a>  | 643.4092  | 642.4019  |
| <input checked="" type="checkbox"/> | <a href="#">52</a>  | 327.6973  | 653.3800  |
| <input checked="" type="checkbox"/> | <a href="#">54</a>  | 665.3381  | 664.3308  |
| <input checked="" type="checkbox"/> | <a href="#">55</a>  | 665.3527  | 664.3454  |
| <input checked="" type="checkbox"/> | <a href="#">56</a>  | 668.9276  | 667.9203  |
| <input checked="" type="checkbox"/> | <a href="#">58</a>  | 694.3491  | 693.3418  |
| <input checked="" type="checkbox"/> | <a href="#">59</a>  | 350.1557  | 698.2968  |
| <input checked="" type="checkbox"/> | <a href="#">60</a>  | 707.3477  | 706.3404  |
| <input checked="" type="checkbox"/> | <a href="#">61</a>  | 723.3727  | 722.3654  |
| <input checked="" type="checkbox"/> | <a href="#">62</a>  | 363.2188  | 724.4230  |
| <input checked="" type="checkbox"/> | <a href="#">65</a>  | 729.7198  | 728.7125  |
| <input checked="" type="checkbox"/> | <a href="#">66</a>  | 729.8578  | 728.8505  |
| <input checked="" type="checkbox"/> | <a href="#">68</a>  | 743.4255  | 742.4182  |
| <input checked="" type="checkbox"/> | <a href="#">69</a>  | 745.9082  | 744.9009  |
| <input checked="" type="checkbox"/> | <a href="#">70</a>  | 757.3588  | 756.3515  |
| <input checked="" type="checkbox"/> | <a href="#">74</a>  | 766.4128  | 765.4055  |
| <input checked="" type="checkbox"/> | <a href="#">75</a>  | 766.6998  | 765.6925  |
| <input checked="" type="checkbox"/> | <a href="#">76</a>  | 774.3881  | 773.3808  |
| <input checked="" type="checkbox"/> | <a href="#">77</a>  | 775.8660  | 774.8587  |
| <input checked="" type="checkbox"/> | <a href="#">78</a>  | 391.2271  | 780.4396  |
| <input checked="" type="checkbox"/> | <a href="#">80</a>  | 787.7332  | 786.7259  |
| <input checked="" type="checkbox"/> | <a href="#">81</a>  | 793.4234  | 792.4161  |
| <input checked="" type="checkbox"/> | <a href="#">82</a>  | 793.4310  | 792.4237  |
| <input checked="" type="checkbox"/> | <a href="#">83</a>  | 794.3906  | 793.3833  |
| <input checked="" type="checkbox"/> | <a href="#">84</a>  | 802.3954  | 801.3881  |
| <input checked="" type="checkbox"/> | <a href="#">85</a>  | 804.7424  | 803.7351  |
| <input checked="" type="checkbox"/> | <a href="#">87</a>  | 819.4597  | 818.4524  |
| <input checked="" type="checkbox"/> | <a href="#">92</a>  | 826.5800  | 825.5727  |
| <input checked="" type="checkbox"/> | <a href="#">95</a>  | 414.2317  | 826.4488  |
| <input checked="" type="checkbox"/> | <a href="#">96</a>  | 828.1093  | 827.1020  |
| <input checked="" type="checkbox"/> | <a href="#">97</a>  | 839.7756  | 838.7683  |
| <input checked="" type="checkbox"/> | <a href="#">101</a> | 421.7563  | 841.4980  |
| <input checked="" type="checkbox"/> | <a href="#">106</a> | 846.4387  | 845.4314  |
| <input checked="" type="checkbox"/> | <a href="#">107</a> | 847.7014  | 846.6941  |
| <input checked="" type="checkbox"/> | <a href="#">108</a> | 855.3943  | 854.3870  |
| <input checked="" type="checkbox"/> | <a href="#">111</a> | 861.4664  | 860.4591  |
| <input checked="" type="checkbox"/> | <a href="#">112</a> | 431.7305  | 861.4464  |
| <input checked="" type="checkbox"/> | <a href="#">113</a> | 431.7315  | 861.4484  |
| <input checked="" type="checkbox"/> | <a href="#">114</a> | 435.7690  | 869.5234  |
| <input checked="" type="checkbox"/> | <a href="#">121</a> | 449.2104  | 896.4062  |
| <input checked="" type="checkbox"/> | <a href="#">122</a> | 899.4448  | 898.4375  |
| <input checked="" type="checkbox"/> | <a href="#">123</a> | 908.7192  | 907.7119  |
| <input checked="" type="checkbox"/> | <a href="#">124</a> | 924.6996  | 923.6923  |
| <input checked="" type="checkbox"/> | <a href="#">125</a> | 935.0483  | 934.0410  |
| <input checked="" type="checkbox"/> | <a href="#">126</a> | 470.7675  | 939.5204  |
| <input checked="" type="checkbox"/> | <a href="#">129</a> | 958.4771  | 957.4698  |
| <input checked="" type="checkbox"/> | <a href="#">131</a> | 487.2795  | 972.5444  |
| <input checked="" type="checkbox"/> | <a href="#">132</a> | 493.2934  | 984.5722  |
| <input checked="" type="checkbox"/> | <a href="#">133</a> | 505.2740  | 1008.5334 |
| <input checked="" type="checkbox"/> | <a href="#">136</a> | 505.7445  | 1009.4744 |
| <input checked="" type="checkbox"/> | <a href="#">137</a> | 1021.3894 | 1020.3821 |
| <input checked="" type="checkbox"/> | <a href="#">141</a> | 515.3065  | 1028.5984 |
| <input checked="" type="checkbox"/> | <a href="#">151</a> | 519.2700  | 1036.5254 |
| <input checked="" type="checkbox"/> | <a href="#">161</a> | 1053.5415 | 1052.5342 |
| <input checked="" type="checkbox"/> | <a href="#">162</a> | 528.3117  | 1054.6088 |
| <input checked="" type="checkbox"/> | <a href="#">163</a> | 530.7632  | 1059.5118 |
| <input checked="" type="checkbox"/> | <a href="#">164</a> | 530.7643  | 1059.5140 |
| <input checked="" type="checkbox"/> | <a href="#">171</a> | 537.2878  | 1072.5610 |
| <input checked="" type="checkbox"/> | <a href="#">174</a> | 545.7690  | 1089.5234 |
| <input checked="" type="checkbox"/> | <a href="#">176</a> | 546.7556  | 1091.4966 |
| <input checked="" type="checkbox"/> | <a href="#">177</a> | 546.7605  | 1091.5064 |
| <input checked="" type="checkbox"/> | <a href="#">178</a> | 553.2914  | 1104.5682 |
| <input checked="" type="checkbox"/> | <a href="#">180</a> | 554.2919  | 1106.5692 |
| <input checked="" type="checkbox"/> | <a href="#">181</a> | 556.7847  | 1111.5548 |
| <input checked="" type="checkbox"/> | <a href="#">182</a> | 564.8070  | 1127.5994 |
| <input checked="" type="checkbox"/> | <a href="#">183</a> | 565.3002  | 1128.5858 |
| <input checked="" type="checkbox"/> | <a href="#">184</a> | 565.3081  | 1128.6016 |
| <input checked="" type="checkbox"/> | <a href="#">185</a> | 565.3114  | 1128.6082 |
| <input checked="" type="checkbox"/> | <a href="#">186</a> | 1135.5474 | 1134.5401 |
| <input checked="" type="checkbox"/> | <a href="#">187</a> | 1137.5103 | 1136.5030 |
| <input checked="" type="checkbox"/> | <a href="#">188</a> | 572.3028  | 1142.5910 |
| <input checked="" type="checkbox"/> | <a href="#">189</a> | 572.3290  | 1142.6434 |
| <input checked="" type="checkbox"/> | <a href="#">190</a> | 574.3148  | 1146.6150 |
| <input checked="" type="checkbox"/> | <a href="#">191</a> | 574.3186  | 1146.6226 |
| <input checked="" type="checkbox"/> | <a href="#">192</a> | 574.3219  | 1146.6292 |
| <input checked="" type="checkbox"/> | <a href="#">193</a> | 574.3220  | 1146.6294 |
| <input checked="" type="checkbox"/> | <a href="#">194</a> | 574.3242  | 1146.6338 |

|                                     |                     |           |           |
|-------------------------------------|---------------------|-----------|-----------|
| <input checked="" type="checkbox"/> | <a href="#">195</a> | 574.3255  | 1146.6364 |
| <input checked="" type="checkbox"/> | <a href="#">200</a> | 574.3392  | 1146.6638 |
| <input checked="" type="checkbox"/> | <a href="#">201</a> | 574.3395  | 1146.6644 |
| <input checked="" type="checkbox"/> | <a href="#">202</a> | 574.8029  | 1147.5912 |
| <input checked="" type="checkbox"/> | <a href="#">203</a> | 578.8290  | 1155.6434 |
| <input checked="" type="checkbox"/> | <a href="#">204</a> | 579.3042  | 1156.5938 |
| <input checked="" type="checkbox"/> | <a href="#">205</a> | 579.3061  | 1156.5976 |
| <input checked="" type="checkbox"/> | <a href="#">206</a> | 1158.7262 | 1157.7189 |
| <input checked="" type="checkbox"/> | <a href="#">207</a> | 580.3287  | 1158.6428 |
| <input checked="" type="checkbox"/> | <a href="#">208</a> | 582.3223  | 1162.6300 |
| <input checked="" type="checkbox"/> | <a href="#">209</a> | 582.3409  | 1162.6672 |
| <input checked="" type="checkbox"/> | <a href="#">211</a> | 587.3020  | 1172.5894 |
| <input checked="" type="checkbox"/> | <a href="#">212</a> | 588.3432  | 1174.6718 |
| <input checked="" type="checkbox"/> | <a href="#">213</a> | 589.8100  | 1177.6054 |
| <input checked="" type="checkbox"/> | <a href="#">214</a> | 590.2994  | 1178.5842 |
| <input checked="" type="checkbox"/> | <a href="#">216</a> | 590.7989  | 1179.5832 |
| <input checked="" type="checkbox"/> | <a href="#">217</a> | 590.8007  | 1179.5868 |
| <input checked="" type="checkbox"/> | <a href="#">219</a> | 590.8085  | 1179.6024 |
| <input checked="" type="checkbox"/> | <a href="#">220</a> | 592.2846  | 1182.5546 |
| <input checked="" type="checkbox"/> | <a href="#">221</a> | 1186.3834 | 1185.3761 |
| <input checked="" type="checkbox"/> | <a href="#">222</a> | 593.8180  | 1185.6214 |
| <input checked="" type="checkbox"/> | <a href="#">225</a> | 596.7852  | 1191.5558 |
| <input checked="" type="checkbox"/> | <a href="#">227</a> | 599.8465  | 1197.6784 |
| <input checked="" type="checkbox"/> | <a href="#">228</a> | 599.8491  | 1197.6836 |
| <input checked="" type="checkbox"/> | <a href="#">230</a> | 602.3141  | 1202.6136 |
| <input checked="" type="checkbox"/> | <a href="#">231</a> | 602.3174  | 1202.6202 |
| <input checked="" type="checkbox"/> | <a href="#">232</a> | 1204.8134 | 1203.8061 |
| <input checked="" type="checkbox"/> | <a href="#">233</a> | 604.8074  | 1207.6002 |
| <input checked="" type="checkbox"/> | <a href="#">235</a> | 606.8433  | 1211.6720 |
| <input checked="" type="checkbox"/> | <a href="#">236</a> | 606.8468  | 1211.6790 |
| <input checked="" type="checkbox"/> | <a href="#">237</a> | 608.3107  | 1214.6068 |
| <input checked="" type="checkbox"/> | <a href="#">238</a> | 612.7756  | 1223.5366 |
| <input checked="" type="checkbox"/> | <a href="#">242</a> | 615.3013  | 1228.5880 |
| <input checked="" type="checkbox"/> | <a href="#">244</a> | 615.3051  | 1228.5956 |
| <input checked="" type="checkbox"/> | <a href="#">246</a> | 616.3533  | 1230.6920 |
| <input checked="" type="checkbox"/> | <a href="#">249</a> | 616.7987  | 1231.5828 |
| <input checked="" type="checkbox"/> | <a href="#">250</a> | 616.8149  | 1231.6152 |
| <input checked="" type="checkbox"/> | <a href="#">251</a> | 616.8370  | 1231.6594 |
| <input checked="" type="checkbox"/> | <a href="#">252</a> | 617.8182  | 1233.6218 |
| <input checked="" type="checkbox"/> | <a href="#">253</a> | 618.2675  | 1234.5204 |
| <input checked="" type="checkbox"/> | <a href="#">255</a> | 618.3215  | 1234.6284 |
| <input checked="" type="checkbox"/> | <a href="#">257</a> | 624.2947  | 1246.5748 |
| <input checked="" type="checkbox"/> | <a href="#">259</a> | 625.3065  | 1248.5984 |
| <input checked="" type="checkbox"/> | <a href="#">260</a> | 625.3119  | 1248.6092 |
| <input checked="" type="checkbox"/> | <a href="#">263</a> | 625.3206  | 1248.6266 |
| <input checked="" type="checkbox"/> | <a href="#">264</a> | 626.3072  | 1250.5998 |
| <input checked="" type="checkbox"/> | <a href="#">265</a> | 627.7880  | 1253.5614 |
| <input checked="" type="checkbox"/> | <a href="#">266</a> | 629.9380  | 1257.8614 |
| <input checked="" type="checkbox"/> | <a href="#">269</a> | 631.3054  | 1260.5962 |
| <input checked="" type="checkbox"/> | <a href="#">272</a> | 631.8072  | 1261.5998 |
| <input checked="" type="checkbox"/> | <a href="#">278</a> | 636.3246  | 1270.6346 |
| <input checked="" type="checkbox"/> | <a href="#">280</a> | 639.3491  | 1276.6836 |
| <input checked="" type="checkbox"/> | <a href="#">283</a> | 639.3563  | 1276.6980 |
| <input checked="" type="checkbox"/> | <a href="#">285</a> | 639.3596  | 1276.7046 |
| <input checked="" type="checkbox"/> | <a href="#">287</a> | 639.8105  | 1277.6064 |
| <input checked="" type="checkbox"/> | <a href="#">288</a> | 428.7632  | 1283.2678 |
| <input checked="" type="checkbox"/> | <a href="#">289</a> | 643.8198  | 1285.6250 |
| <input checked="" type="checkbox"/> | <a href="#">290</a> | 644.7901  | 1287.5656 |
| <input checked="" type="checkbox"/> | <a href="#">291</a> | 644.8137  | 1287.6128 |
| <input checked="" type="checkbox"/> | <a href="#">293</a> | 646.3283  | 1290.6420 |
| <input checked="" type="checkbox"/> | <a href="#">295</a> | 648.3762  | 1294.7378 |
| <input checked="" type="checkbox"/> | <a href="#">296</a> | 651.8530  | 1301.6914 |
| <input checked="" type="checkbox"/> | <a href="#">297</a> | 651.8588  | 1301.7030 |
| <input checked="" type="checkbox"/> | <a href="#">303</a> | 653.7860  | 1305.5574 |
| <input checked="" type="checkbox"/> | <a href="#">304</a> | 657.3508  | 1312.6870 |
| <input checked="" type="checkbox"/> | <a href="#">305</a> | 657.8543  | 1313.6940 |
| <input checked="" type="checkbox"/> | <a href="#">306</a> | 659.3350  | 1316.6554 |
| <input checked="" type="checkbox"/> | <a href="#">308</a> | 659.3590  | 1316.7034 |
| <input checked="" type="checkbox"/> | <a href="#">310</a> | 662.8101  | 1323.6056 |
| <input checked="" type="checkbox"/> | <a href="#">311</a> | 662.8180  | 1323.6214 |
| <input checked="" type="checkbox"/> | <a href="#">312</a> | 664.8234  | 1327.6322 |
| <input checked="" type="checkbox"/> | <a href="#">314</a> | 665.3420  | 1328.6694 |
| <input checked="" type="checkbox"/> | <a href="#">315</a> | 665.3454  | 1328.6762 |
| <input checked="" type="checkbox"/> | <a href="#">317</a> | 665.3479  | 1328.6812 |
| <input checked="" type="checkbox"/> | <a href="#">318</a> | 665.3576  | 1328.7006 |
| <input checked="" type="checkbox"/> | <a href="#">319</a> | 665.3637  | 1328.7128 |
| <input checked="" type="checkbox"/> | <a href="#">322</a> | 668.3506  | 1334.6866 |

|                                     |                     |           |           |
|-------------------------------------|---------------------|-----------|-----------|
| <input checked="" type="checkbox"/> | <a href="#">323</a> | 669.8050  | 1337.5954 |
| <input checked="" type="checkbox"/> | <a href="#">324</a> | 670.3049  | 1338.5952 |
| <input checked="" type="checkbox"/> | <a href="#">325</a> | 670.3211  | 1338.6276 |
| <input checked="" type="checkbox"/> | <a href="#">326</a> | 670.8461  | 1339.6776 |
| <input checked="" type="checkbox"/> | <a href="#">328</a> | 671.3350  | 1340.6554 |
| <input checked="" type="checkbox"/> | <a href="#">329</a> | 671.3575  | 1340.7004 |
| <input checked="" type="checkbox"/> | <a href="#">331</a> | 672.3639  | 1342.7132 |
| <input checked="" type="checkbox"/> | <a href="#">332</a> | 672.8434  | 1343.6722 |
| <input checked="" type="checkbox"/> | <a href="#">333</a> | 674.8414  | 1347.6682 |
| <input checked="" type="checkbox"/> | <a href="#">334</a> | 675.3286  | 1348.6426 |
| <input checked="" type="checkbox"/> | <a href="#">335</a> | 676.9155  | 1351.8164 |
| <input checked="" type="checkbox"/> | <a href="#">336</a> | 677.8329  | 1353.6512 |
| <input checked="" type="checkbox"/> | <a href="#">337</a> | 680.3687  | 1358.7228 |
| <input checked="" type="checkbox"/> | <a href="#">338</a> | 681.3326  | 1360.6506 |
| <input checked="" type="checkbox"/> | <a href="#">339</a> | 682.3409  | 1362.6672 |
| <input checked="" type="checkbox"/> | <a href="#">340</a> | 685.3844  | 1368.7542 |
| <input checked="" type="checkbox"/> | <a href="#">341</a> | 687.3656  | 1372.7166 |
| <input checked="" type="checkbox"/> | <a href="#">343</a> | 688.3516  | 1374.6886 |
| <input checked="" type="checkbox"/> | <a href="#">346</a> | 691.3408  | 1380.6670 |
| <input checked="" type="checkbox"/> | <a href="#">347</a> | 692.3462  | 1382.6778 |
| <input checked="" type="checkbox"/> | <a href="#">349</a> | 692.3532  | 1382.6918 |
| <input checked="" type="checkbox"/> | <a href="#">350</a> | 692.3560  | 1382.6974 |
| <input checked="" type="checkbox"/> | <a href="#">353</a> | 698.8453  | 1395.6760 |
| <input checked="" type="checkbox"/> | <a href="#">355</a> | 702.8401  | 1403.6656 |
| <input checked="" type="checkbox"/> | <a href="#">357</a> | 708.9245  | 1415.8344 |
| <input checked="" type="checkbox"/> | <a href="#">358</a> | 710.8427  | 1419.6708 |
| <input checked="" type="checkbox"/> | <a href="#">359</a> | 711.3199  | 1420.6252 |
| <input checked="" type="checkbox"/> | <a href="#">362</a> | 714.7645  | 1427.5144 |
| <input checked="" type="checkbox"/> | <a href="#">363</a> | 715.8468  | 1429.6790 |
| <input checked="" type="checkbox"/> | <a href="#">365</a> | 719.3273  | 1436.6400 |
| <input checked="" type="checkbox"/> | <a href="#">366</a> | 720.3449  | 1438.6752 |
| <input checked="" type="checkbox"/> | <a href="#">367</a> | 720.8420  | 1439.6694 |
| <input checked="" type="checkbox"/> | <a href="#">368</a> | 722.8765  | 1443.7384 |
| <input checked="" type="checkbox"/> | <a href="#">369</a> | 722.8981  | 1443.7816 |
| <input checked="" type="checkbox"/> | <a href="#">370</a> | 723.3694  | 1444.7242 |
| <input checked="" type="checkbox"/> | <a href="#">374</a> | 730.8651  | 1459.7156 |
| <input checked="" type="checkbox"/> | <a href="#">377</a> | 730.8934  | 1459.7722 |
| <input checked="" type="checkbox"/> | <a href="#">379</a> | 730.8994  | 1459.7842 |
| <input checked="" type="checkbox"/> | <a href="#">380</a> | 730.9032  | 1459.7918 |
| <input checked="" type="checkbox"/> | <a href="#">381</a> | 733.3936  | 1464.7726 |
| <input checked="" type="checkbox"/> | <a href="#">382</a> | 735.8239  | 1469.6332 |
| <input checked="" type="checkbox"/> | <a href="#">383</a> | 737.8687  | 1473.7228 |
| <input checked="" type="checkbox"/> | <a href="#">386</a> | 738.3757  | 1474.7368 |
| <input checked="" type="checkbox"/> | <a href="#">387</a> | 738.3763  | 1474.7380 |
| <input checked="" type="checkbox"/> | <a href="#">389</a> | 738.3772  | 1474.7398 |
| <input checked="" type="checkbox"/> | <a href="#">390</a> | 738.3773  | 1474.7400 |
| <input checked="" type="checkbox"/> | <a href="#">395</a> | 738.3854  | 1474.7562 |
| <input checked="" type="checkbox"/> | <a href="#">396</a> | 738.3863  | 1474.7580 |
| <input checked="" type="checkbox"/> | <a href="#">398</a> | 738.3889  | 1474.7632 |
| <input checked="" type="checkbox"/> | <a href="#">402</a> | 740.3651  | 1478.7156 |
| <input checked="" type="checkbox"/> | <a href="#">403</a> | 746.8673  | 1491.7200 |
| <input checked="" type="checkbox"/> | <a href="#">404</a> | 747.8588  | 1493.7030 |
| <input checked="" type="checkbox"/> | <a href="#">406</a> | 748.8496  | 1495.6846 |
| <input checked="" type="checkbox"/> | <a href="#">407</a> | 748.8518  | 1495.6890 |
| <input checked="" type="checkbox"/> | <a href="#">409</a> | 757.8577  | 1513.7008 |
| <input checked="" type="checkbox"/> | <a href="#">411</a> | 758.4211  | 1514.8276 |
| <input checked="" type="checkbox"/> | <a href="#">412</a> | 759.4084  | 1516.8022 |
| <input checked="" type="checkbox"/> | <a href="#">413</a> | 759.4500  | 1516.8854 |
| <input checked="" type="checkbox"/> | <a href="#">414</a> | 766.8566  | 1531.6986 |
| <input checked="" type="checkbox"/> | <a href="#">416</a> | 766.8604  | 1531.7062 |
| <input checked="" type="checkbox"/> | <a href="#">419</a> | 773.8304  | 1545.6462 |
| <input checked="" type="checkbox"/> | <a href="#">420</a> | 774.8945  | 1547.7744 |
| <input checked="" type="checkbox"/> | <a href="#">421</a> | 775.3884  | 1548.7622 |
| <input checked="" type="checkbox"/> | <a href="#">422</a> | 775.8660  | 1549.7174 |
| <input checked="" type="checkbox"/> | <a href="#">423</a> | 775.8663  | 1549.7180 |
| <input checked="" type="checkbox"/> | <a href="#">425</a> | 1552.7470 | 1551.7397 |
| <input checked="" type="checkbox"/> | <a href="#">426</a> | 778.8869  | 1555.7592 |
| <input checked="" type="checkbox"/> | <a href="#">427</a> | 778.9056  | 1555.7966 |
| <input checked="" type="checkbox"/> | <a href="#">429</a> | 783.8977  | 1565.7808 |
| <input checked="" type="checkbox"/> | <a href="#">430</a> | 784.8284  | 1567.6422 |
| <input checked="" type="checkbox"/> | <a href="#">431</a> | 785.3452  | 1568.6758 |
| <input checked="" type="checkbox"/> | <a href="#">432</a> | 785.3531  | 1568.6916 |
| <input checked="" type="checkbox"/> | <a href="#">433</a> | 785.8189  | 1569.6232 |
| <input checked="" type="checkbox"/> | <a href="#">434</a> | 785.8344  | 1569.6542 |
| <input checked="" type="checkbox"/> | <a href="#">435</a> | 785.8349  | 1569.6552 |
| <input checked="" type="checkbox"/> | <a href="#">437</a> | 785.8361  | 1569.6576 |
| <input checked="" type="checkbox"/> | <a href="#">438</a> | 785.8381  | 1569.6616 |

|                                     |                     |          |           |
|-------------------------------------|---------------------|----------|-----------|
| <input checked="" type="checkbox"/> | <a href="#">439</a> | 785.8392 | 1569.6638 |
| <input checked="" type="checkbox"/> | <a href="#">440</a> | 785.8394 | 1569.6642 |
| <input checked="" type="checkbox"/> | <a href="#">441</a> | 785.8402 | 1569.6658 |
| <input checked="" type="checkbox"/> | <a href="#">442</a> | 785.8404 | 1569.6662 |
| <input checked="" type="checkbox"/> | <a href="#">443</a> | 785.8405 | 1569.6664 |
| <input checked="" type="checkbox"/> | <a href="#">445</a> | 785.8419 | 1569.6692 |
| <input checked="" type="checkbox"/> | <a href="#">446</a> | 785.8422 | 1569.6698 |
| <input checked="" type="checkbox"/> | <a href="#">447</a> | 785.8422 | 1569.6698 |
| <input checked="" type="checkbox"/> | <a href="#">448</a> | 785.8430 | 1569.6714 |
| <input checked="" type="checkbox"/> | <a href="#">449</a> | 785.8434 | 1569.6722 |
| <input checked="" type="checkbox"/> | <a href="#">450</a> | 785.8450 | 1569.6754 |
| <input checked="" type="checkbox"/> | <a href="#">451</a> | 785.8452 | 1569.6758 |
| <input checked="" type="checkbox"/> | <a href="#">452</a> | 785.8452 | 1569.6758 |
| <input checked="" type="checkbox"/> | <a href="#">454</a> | 785.8458 | 1569.6770 |
| <input checked="" type="checkbox"/> | <a href="#">455</a> | 785.8459 | 1569.6772 |
| <input checked="" type="checkbox"/> | <a href="#">456</a> | 785.8461 | 1569.6776 |
| <input checked="" type="checkbox"/> | <a href="#">457</a> | 785.8469 | 1569.6792 |
| <input checked="" type="checkbox"/> | <a href="#">458</a> | 785.8471 | 1569.6796 |
| <input checked="" type="checkbox"/> | <a href="#">459</a> | 785.8486 | 1569.6826 |
| <input checked="" type="checkbox"/> | <a href="#">460</a> | 785.8491 | 1569.6836 |
| <input checked="" type="checkbox"/> | <a href="#">461</a> | 785.8521 | 1569.6896 |
| <input checked="" type="checkbox"/> | <a href="#">462</a> | 785.8521 | 1569.6896 |
| <input checked="" type="checkbox"/> | <a href="#">463</a> | 785.8529 | 1569.6912 |
| <input checked="" type="checkbox"/> | <a href="#">464</a> | 785.8530 | 1569.6914 |
| <input checked="" type="checkbox"/> | <a href="#">465</a> | 785.8535 | 1569.6924 |
| <input checked="" type="checkbox"/> | <a href="#">467</a> | 786.3513 | 1570.6880 |
| <input checked="" type="checkbox"/> | <a href="#">468</a> | 786.3592 | 1570.7038 |
| <input checked="" type="checkbox"/> | <a href="#">469</a> | 786.8524 | 1571.6902 |
| <input checked="" type="checkbox"/> | <a href="#">470</a> | 786.8537 | 1571.6928 |
| <input checked="" type="checkbox"/> | <a href="#">472</a> | 793.4410 | 1584.8674 |
| <input checked="" type="checkbox"/> | <a href="#">473</a> | 794.8373 | 1587.6600 |
| <input checked="" type="checkbox"/> | <a href="#">474</a> | 794.8431 | 1587.6716 |
| <input checked="" type="checkbox"/> | <a href="#">475</a> | 794.8470 | 1587.6794 |
| <input checked="" type="checkbox"/> | <a href="#">476</a> | 795.8804 | 1589.7462 |
| <input checked="" type="checkbox"/> | <a href="#">480</a> | 801.9072 | 1601.7998 |
| <input checked="" type="checkbox"/> | <a href="#">481</a> | 801.9081 | 1601.8016 |
| <input checked="" type="checkbox"/> | <a href="#">482</a> | 801.9114 | 1601.8082 |
| <input checked="" type="checkbox"/> | <a href="#">483</a> | 801.9171 | 1601.8196 |
| <input checked="" type="checkbox"/> | <a href="#">485</a> | 803.8721 | 1605.7296 |
| <input checked="" type="checkbox"/> | <a href="#">486</a> | 803.8863 | 1605.7580 |
| <input checked="" type="checkbox"/> | <a href="#">487</a> | 809.8927 | 1617.7708 |
| <input checked="" type="checkbox"/> | <a href="#">488</a> | 809.9073 | 1617.8000 |
| <input checked="" type="checkbox"/> | <a href="#">489</a> | 810.8683 | 1619.7220 |
| <input checked="" type="checkbox"/> | <a href="#">490</a> | 810.8767 | 1619.7388 |
| <input checked="" type="checkbox"/> | <a href="#">492</a> | 816.3729 | 1630.7312 |
| <input checked="" type="checkbox"/> | <a href="#">494</a> | 816.8885 | 1631.7624 |
| <input checked="" type="checkbox"/> | <a href="#">495</a> | 816.8889 | 1631.7632 |
| <input checked="" type="checkbox"/> | <a href="#">499</a> | 816.8913 | 1631.7680 |
| <input checked="" type="checkbox"/> | <a href="#">506</a> | 816.8958 | 1631.7770 |
| <input checked="" type="checkbox"/> | <a href="#">509</a> | 816.8964 | 1631.7782 |
| <input checked="" type="checkbox"/> | <a href="#">513</a> | 816.8972 | 1631.7798 |
| <input checked="" type="checkbox"/> | <a href="#">520</a> | 816.9018 | 1631.7890 |
| <input checked="" type="checkbox"/> | <a href="#">522</a> | 816.9097 | 1631.8048 |
| <input checked="" type="checkbox"/> | <a href="#">523</a> | 818.8920 | 1635.7694 |
| <input checked="" type="checkbox"/> | <a href="#">524</a> | 824.3835 | 1646.7524 |
| <input checked="" type="checkbox"/> | <a href="#">527</a> | 827.7864 | 1653.5582 |
| <input checked="" type="checkbox"/> | <a href="#">529</a> | 834.9656 | 1667.9166 |
| <input checked="" type="checkbox"/> | <a href="#">530</a> | 839.8098 | 1677.6050 |
| <input checked="" type="checkbox"/> | <a href="#">531</a> | 843.3881 | 1684.7616 |
| <input checked="" type="checkbox"/> | <a href="#">532</a> | 849.9309 | 1697.8472 |
| <input checked="" type="checkbox"/> | <a href="#">533</a> | 851.3857 | 1700.7568 |
| <input checked="" type="checkbox"/> | <a href="#">536</a> | 851.4559 | 1700.8972 |
| <input checked="" type="checkbox"/> | <a href="#">537</a> | 851.4569 | 1700.8992 |
| <input checked="" type="checkbox"/> | <a href="#">538</a> | 851.4605 | 1700.9064 |
| <input checked="" type="checkbox"/> | <a href="#">539</a> | 851.4640 | 1700.9134 |
| <input checked="" type="checkbox"/> | <a href="#">540</a> | 854.3861 | 1706.7576 |
| <input checked="" type="checkbox"/> | <a href="#">541</a> | 854.3962 | 1706.7778 |
| <input checked="" type="checkbox"/> | <a href="#">542</a> | 854.4028 | 1706.7910 |
| <input checked="" type="checkbox"/> | <a href="#">543</a> | 428.7939 | 1711.1465 |
| <input checked="" type="checkbox"/> | <a href="#">545</a> | 859.4514 | 1716.8882 |
| <input checked="" type="checkbox"/> | <a href="#">546</a> | 864.9410 | 1727.8674 |
| <input checked="" type="checkbox"/> | <a href="#">547</a> | 864.9565 | 1727.8984 |
| <input checked="" type="checkbox"/> | <a href="#">548</a> | 870.4334 | 1738.8522 |
| <input checked="" type="checkbox"/> | <a href="#">549</a> | 870.8630 | 1739.7114 |
| <input checked="" type="checkbox"/> | <a href="#">550</a> | 872.4373 | 1742.8600 |
| <input checked="" type="checkbox"/> | <a href="#">551</a> | 878.4237 | 1754.8328 |
| <input checked="" type="checkbox"/> | <a href="#">552</a> | 878.9592 | 1755.9038 |

|                                     |                     |           |           |
|-------------------------------------|---------------------|-----------|-----------|
| <input checked="" type="checkbox"/> | <a href="#">553</a> | 879.9443  | 1757.8740 |
| <input checked="" type="checkbox"/> | <a href="#">556</a> | 883.8915  | 1765.7684 |
| <input checked="" type="checkbox"/> | <a href="#">558</a> | 883.9031  | 1765.7916 |
| <input checked="" type="checkbox"/> | <a href="#">559</a> | 886.4130  | 1770.8114 |
| <input checked="" type="checkbox"/> | <a href="#">560</a> | 888.4164  | 1774.8182 |
| <input checked="" type="checkbox"/> | <a href="#">561</a> | 445.0783  | 1776.2841 |
| <input checked="" type="checkbox"/> | <a href="#">562</a> | 595.3426  | 1783.0060 |
| <input checked="" type="checkbox"/> | <a href="#">563</a> | 892.8724  | 1783.7302 |
| <input checked="" type="checkbox"/> | <a href="#">564</a> | 892.8902  | 1783.7658 |
| <input checked="" type="checkbox"/> | <a href="#">567</a> | 896.3662  | 1790.7178 |
| <input checked="" type="checkbox"/> | <a href="#">574</a> | 898.4035  | 1794.7924 |
| <input checked="" type="checkbox"/> | <a href="#">575</a> | 900.1204  | 1798.2262 |
| <input checked="" type="checkbox"/> | <a href="#">578</a> | 913.4081  | 1824.8016 |
| <input checked="" type="checkbox"/> | <a href="#">579</a> | 913.9026  | 1825.7906 |
| <input checked="" type="checkbox"/> | <a href="#">581</a> | 913.9164  | 1825.8182 |
| <input checked="" type="checkbox"/> | <a href="#">582</a> | 914.4834  | 1826.9522 |
| <input checked="" type="checkbox"/> | <a href="#">583</a> | 917.4860  | 1832.9574 |
| <input checked="" type="checkbox"/> | <a href="#">584</a> | 917.4905  | 1832.9664 |
| <input checked="" type="checkbox"/> | <a href="#">585</a> | 918.5268  | 1835.0390 |
| <input checked="" type="checkbox"/> | <a href="#">586</a> | 929.0120  | 1856.0094 |
| <input checked="" type="checkbox"/> | <a href="#">587</a> | 937.9552  | 1873.8958 |
| <input checked="" type="checkbox"/> | <a href="#">588</a> | 959.0217  | 1916.0288 |
| <input checked="" type="checkbox"/> | <a href="#">589</a> | 973.5071  | 1944.9996 |
| <input checked="" type="checkbox"/> | <a href="#">590</a> | 979.4918  | 1956.9690 |
| <input checked="" type="checkbox"/> | <a href="#">592</a> | 678.8873  | 2033.6401 |
| <input checked="" type="checkbox"/> | <a href="#">593</a> | 688.3813  | 2062.1221 |
| <input checked="" type="checkbox"/> | <a href="#">594</a> | 1039.0304 | 2076.0462 |
| <input checked="" type="checkbox"/> | <a href="#">596</a> | 1040.9813 | 2079.9480 |
| <input checked="" type="checkbox"/> | <a href="#">597</a> | 1040.9854 | 2079.9562 |
| <input checked="" type="checkbox"/> | <a href="#">598</a> | 697.7272  | 2090.1598 |
| <input checked="" type="checkbox"/> | <a href="#">599</a> | 704.9998  | 2111.9776 |
| <input checked="" type="checkbox"/> | <a href="#">600</a> | 705.0000  | 2111.9782 |
| <input checked="" type="checkbox"/> | <a href="#">602</a> | 705.0046  | 2111.9920 |
| <input checked="" type="checkbox"/> | <a href="#">603</a> | 1057.0109 | 2112.0072 |
| <input checked="" type="checkbox"/> | <a href="#">604</a> | 705.3431  | 2113.0075 |
| <input checked="" type="checkbox"/> | <a href="#">605</a> | 707.3242  | 2118.9508 |
| <input checked="" type="checkbox"/> | <a href="#">606</a> | 707.3287  | 2118.9643 |
| <input checked="" type="checkbox"/> | <a href="#">608</a> | 707.3390  | 2118.9952 |
| <input checked="" type="checkbox"/> | <a href="#">609</a> | 707.3412  | 2119.0018 |
| <input checked="" type="checkbox"/> | <a href="#">610</a> | 707.9768  | 2120.9086 |
| <input checked="" type="checkbox"/> | <a href="#">611</a> | 708.3425  | 2122.0057 |
| <input checked="" type="checkbox"/> | <a href="#">612</a> | 712.6883  | 2135.0431 |
| <input checked="" type="checkbox"/> | <a href="#">613</a> | 715.3429  | 2143.0069 |
| <input checked="" type="checkbox"/> | <a href="#">614</a> | 715.3459  | 2143.0159 |
| <input checked="" type="checkbox"/> | <a href="#">615</a> | 1072.5183 | 2143.0220 |
| <input checked="" type="checkbox"/> | <a href="#">616</a> | 1072.5190 | 2143.0234 |
| <input checked="" type="checkbox"/> | <a href="#">618</a> | 1072.5215 | 2143.0284 |
| <input checked="" type="checkbox"/> | <a href="#">619</a> | 1072.5273 | 2143.0400 |
| <input checked="" type="checkbox"/> | <a href="#">620</a> | 1072.5293 | 2143.0440 |
| <input checked="" type="checkbox"/> | <a href="#">621</a> | 1074.9668 | 2147.9190 |
| <input checked="" type="checkbox"/> | <a href="#">622</a> | 723.3387  | 2166.9943 |
| <input checked="" type="checkbox"/> | <a href="#">623</a> | 737.6983  | 2210.0731 |
| <input checked="" type="checkbox"/> | <a href="#">625</a> | 737.7109  | 2210.1109 |
| <input checked="" type="checkbox"/> | <a href="#">627</a> | 743.4150  | 2227.2232 |
| <input checked="" type="checkbox"/> | <a href="#">628</a> | 745.4305  | 2233.2697 |
| <input checked="" type="checkbox"/> | <a href="#">629</a> | 748.0370  | 2241.0892 |
| <input checked="" type="checkbox"/> | <a href="#">630</a> | 752.6371  | 2254.8895 |
| <input checked="" type="checkbox"/> | <a href="#">631</a> | 757.3587  | 2269.0543 |
| <input checked="" type="checkbox"/> | <a href="#">633</a> | 762.0526  | 2283.1360 |
| <input checked="" type="checkbox"/> | <a href="#">634</a> | 769.3136  | 2304.9190 |
| <input checked="" type="checkbox"/> | <a href="#">635</a> | 773.5890  | 2317.7452 |
| <input checked="" type="checkbox"/> | <a href="#">636</a> | 776.3817  | 2326.1233 |
| <input checked="" type="checkbox"/> | <a href="#">637</a> | 776.3966  | 2326.1680 |
| <input checked="" type="checkbox"/> | <a href="#">639</a> | 1186.5781 | 2371.1416 |
| <input checked="" type="checkbox"/> | <a href="#">640</a> | 1187.2501 | 2372.4856 |
| <input checked="" type="checkbox"/> | <a href="#">641</a> | 795.3820  | 2383.1242 |
| <input checked="" type="checkbox"/> | <a href="#">642</a> | 1193.6521 | 2385.2896 |
| <input checked="" type="checkbox"/> | <a href="#">643</a> | 801.3739  | 2401.0999 |
| <input checked="" type="checkbox"/> | <a href="#">645</a> | 1204.4891 | 2406.9636 |
| <input checked="" type="checkbox"/> | <a href="#">646</a> | 1206.2017 | 2410.3888 |
| <input checked="" type="checkbox"/> | <a href="#">647</a> | 813.3870  | 2437.1392 |
| <input checked="" type="checkbox"/> | <a href="#">648</a> | 1233.2035 | 2464.3924 |
| <input checked="" type="checkbox"/> | <a href="#">649</a> | 828.0746  | 2481.2020 |
| <input checked="" type="checkbox"/> | <a href="#">650</a> | 843.8010  | 2528.3812 |
| <input checked="" type="checkbox"/> | <a href="#">651</a> | 857.3363  | 2568.9871 |
| <input checked="" type="checkbox"/> | <a href="#">652</a> | 859.6450  | 2575.9132 |
| <input checked="" type="checkbox"/> | <a href="#">653</a> | 875.4052  | 2623.1938 |

|                                     |                     |           |           |
|-------------------------------------|---------------------|-----------|-----------|
| <input checked="" type="checkbox"/> | <a href="#">654</a> | 670.4191  | 2677.6473 |
| <input checked="" type="checkbox"/> | <a href="#">655</a> | 896.6437  | 2686.9093 |
| <input checked="" type="checkbox"/> | <a href="#">656</a> | 899.5475  | 2695.6207 |
| <input checked="" type="checkbox"/> | <a href="#">657</a> | 900.0706  | 2697.1900 |
| <input checked="" type="checkbox"/> | <a href="#">658</a> | 915.8900  | 2744.6482 |
| <input checked="" type="checkbox"/> | <a href="#">659</a> | 918.9715  | 2753.8927 |
| <input checked="" type="checkbox"/> | <a href="#">660</a> | 929.7820  | 2786.3242 |
| <input checked="" type="checkbox"/> | <a href="#">661</a> | 930.1228  | 2787.3466 |
| <input checked="" type="checkbox"/> | <a href="#">662</a> | 706.6091  | 2822.4073 |
| <input checked="" type="checkbox"/> | <a href="#">663</a> | 958.1210  | 2871.3412 |
| <input checked="" type="checkbox"/> | <a href="#">664</a> | 958.1260  | 2871.3562 |
| <input checked="" type="checkbox"/> | <a href="#">665</a> | 958.1278  | 2871.3616 |
| <input checked="" type="checkbox"/> | <a href="#">667</a> | 961.4618  | 2881.3636 |
| <input checked="" type="checkbox"/> | <a href="#">668</a> | 973.1750  | 2916.5032 |
| <input checked="" type="checkbox"/> | <a href="#">669</a> | 732.3851  | 2925.5113 |
| <input checked="" type="checkbox"/> | <a href="#">670</a> | 737.3884  | 2945.5245 |
| <input checked="" type="checkbox"/> | <a href="#">671</a> | 742.2606  | 2965.0133 |
| <input checked="" type="checkbox"/> | <a href="#">672</a> | 748.3859  | 2989.5145 |
| <input checked="" type="checkbox"/> | <a href="#">673</a> | 748.4033  | 2989.5841 |
| <input checked="" type="checkbox"/> | <a href="#">674</a> | 749.1548  | 2992.5901 |
| <input checked="" type="checkbox"/> | <a href="#">677</a> | 758.6400  | 3030.5309 |
| <input checked="" type="checkbox"/> | <a href="#">678</a> | 1016.1148 | 3045.3226 |
| <input checked="" type="checkbox"/> | <a href="#">679</a> | 1022.4659 | 3064.3759 |
| <input checked="" type="checkbox"/> | <a href="#">680</a> | 1031.4298 | 3091.2676 |
| <input checked="" type="checkbox"/> | <a href="#">681</a> | 774.1323  | 3092.5001 |
| <input checked="" type="checkbox"/> | <a href="#">682</a> | 776.1229  | 3100.4625 |
| <input checked="" type="checkbox"/> | <a href="#">683</a> | 785.6156  | 3138.4333 |
| <input checked="" type="checkbox"/> | <a href="#">684</a> | 786.3461  | 3141.3553 |
| <input checked="" type="checkbox"/> | <a href="#">685</a> | 789.1204  | 3152.4525 |
| <input checked="" type="checkbox"/> | <a href="#">686</a> | 797.1930  | 3184.7429 |
| <input checked="" type="checkbox"/> | <a href="#">687</a> | 810.3776  | 3237.4813 |
| <input checked="" type="checkbox"/> | <a href="#">688</a> | 810.3818  | 3237.4981 |
| <input checked="" type="checkbox"/> | <a href="#">689</a> | 1085.5421 | 3253.6045 |
| <input checked="" type="checkbox"/> | <a href="#">690</a> | 816.9273  | 3263.6801 |
| <input checked="" type="checkbox"/> | <a href="#">691</a> | 823.1737  | 3288.6657 |
| <input checked="" type="checkbox"/> | <a href="#">692</a> | 829.1945  | 3312.7489 |
| <input checked="" type="checkbox"/> | <a href="#">693</a> | 1119.1757 | 3354.5053 |
| <input checked="" type="checkbox"/> | <a href="#">695</a> | 858.6205  | 3430.4529 |
| <input checked="" type="checkbox"/> | <a href="#">696</a> | 869.3155  | 3473.2329 |
| <input checked="" type="checkbox"/> | <a href="#">697</a> | 870.4107  | 3477.6137 |
| <input checked="" type="checkbox"/> | <a href="#">698</a> | 873.2922  | 3489.1397 |
| <input checked="" type="checkbox"/> | <a href="#">699</a> | 1176.4674 | 3526.3804 |
| <input checked="" type="checkbox"/> | <a href="#">700</a> | 886.1975  | 3540.7609 |
| <input checked="" type="checkbox"/> | <a href="#">701</a> | 889.4472  | 3553.7597 |
| <input checked="" type="checkbox"/> | <a href="#">702</a> | 908.3743  | 3629.4681 |
| <input checked="" type="checkbox"/> | <a href="#">703</a> | 914.8817  | 3655.4977 |
| <input checked="" type="checkbox"/> | <a href="#">704</a> | 930.3966  | 3717.5573 |
| <input checked="" type="checkbox"/> | <a href="#">705</a> | 932.3429  | 3725.3425 |
| <input checked="" type="checkbox"/> | <a href="#">706</a> | 944.9282  | 3775.6837 |
| <input checked="" type="checkbox"/> | <a href="#">707</a> | 959.3601  | 3833.4113 |
| <input checked="" type="checkbox"/> | <a href="#">708</a> | 962.2110  | 3844.8149 |
| <input checked="" type="checkbox"/> | <a href="#">709</a> | 968.3356  | 3869.3133 |
| <input checked="" type="checkbox"/> | <a href="#">710</a> | 969.9287  | 3875.6857 |
| <input checked="" type="checkbox"/> | <a href="#">711</a> | 982.5540  | 3926.1869 |
| <input checked="" type="checkbox"/> | <a href="#">712</a> | 1342.2548 | 4023.7426 |
| <input checked="" type="checkbox"/> | <a href="#">713</a> | 1011.4422 | 4041.7397 |
| <input checked="" type="checkbox"/> | <a href="#">714</a> | 1015.4938 | 4057.9461 |
| <input checked="" type="checkbox"/> | <a href="#">715</a> | 1078.9778 | 4311.8821 |
| <input checked="" type="checkbox"/> | <a href="#">716</a> | 1094.4548 | 4373.7901 |
| <input checked="" type="checkbox"/> | <a href="#">717</a> | 1133.5477 | 4530.1617 |
| <input checked="" type="checkbox"/> | <a href="#">718</a> | 1134.9469 | 4535.7585 |
| <input checked="" type="checkbox"/> | <a href="#">719</a> | 1135.4979 | 4537.9625 |
| <input checked="" type="checkbox"/> | <a href="#">720</a> | 1139.0413 | 4552.1361 |
| <input checked="" type="checkbox"/> | <a href="#">721</a> | 1169.6051 | 4674.3913 |
| <input checked="" type="checkbox"/> | <a href="#">722</a> | 1210.4652 | 4837.8317 |
| <input checked="" type="checkbox"/> | <a href="#">723</a> | 1225.5979 | 4898.3625 |
| <input checked="" type="checkbox"/> | <a href="#">724</a> | 1309.0933 | 5232.3441 |
| <input checked="" type="checkbox"/> | <a href="#">725</a> | 1359.3607 | 5433.4137 |

---

### Search Parameters

Type of search : MS/MS Ion Search  
Enzyme : Trypsin  
Fixed modifications : Carbamidomethyl (C)  
Variable modifications : Oxidation (M)  
Mass values : Monoisotopic  
Protein Mass : Unrestricted  
Peptide Mass Tolerance :  $\pm$  50 ppm



Fragment Mass Tolerance:  $\pm$  0.2 Da  
Max Missed Cleavages : 1  
Instrument type : ESI-QUAD-TOF  
Number of queries : 725

Mascot: <http://www.matrixscience.com/>



## Mascot Search Results

User : Dominic  
 Email : dominic.kurian@bbsrc.ac.uk  
 Search title : IPI Mouse\_15-02-2010  
 MS data file : C:\Program Files\Matrix Science\Mascot Daemon\mgf\33 10753\mascot\_daemon\_merge.mgf  
 Database : IPI\_mouse MOUSE\_v3\_79 (54943 sequences; 24917557 residues)  
 Timestamp : 15 Feb 2011 at 12:03:54 GMT  
 Protein hits :

- [IPI00420725](#) Tax\_Id=10090 Gene\_Symbol=Camk2a Uncharacterized protein
- [IPI00474502](#) Tax\_Id=10090 Gene\_Symbol=Camk2b Calcium/calmodulin-dependent protein kinase type II subunit beta
- [IPI00117352](#) Tax\_Id=10090 Gene\_Symbol=Tubb5 Tubulin beta-5 chain
- [IPI00112584](#) Tax\_Id=10090 Gene\_Symbol=Camk2d Isoform 1 of Calcium/calmodulin-dependent protein kinase type II subunit
- [IPI00608020](#) Tax\_Id=10090 Gene\_Symbol=Ftl1 ferritin light chain 1
- [IPI00109061](#) Tax\_Id=10090 Gene\_Symbol=Tubb2b Tubulin beta-2B chain
- [IPI00169463](#) Tax\_Id=10090 Gene\_Symbol=Tubb2c Tubulin beta-2C chain
- [IPI00124695](#) Tax\_Id=10090 Gene\_Symbol=Camk2g Isoform 1 of Calcium/calmodulin-dependent protein kinase type II subunit
- [IPI00117348](#) Tax\_Id=10090 Gene\_Symbol=Tuba1b Tubulin alpha-1B chain
- [IPI00230145](#) Tax\_Id=10090 Gene\_Symbol=Fth1 Ferritin heavy chain
- [IPI00112251](#) Tax\_Id=10090 Gene\_Symbol=Tubb3 Tubulin beta-3 chain
- [IPI00115546](#) Tax\_Id=10090 Gene\_Symbol=Gnao1 Isoform Alpha-2 of Guanine nucleotide-binding protein G(o) subunit alpha
- [IPI00138892](#) Tax\_Id=10090 Gene\_Symbol=Uba52 Ubiquitin-60S ribosomal protein L40
- [IPI00122048](#) Tax\_Id=10090 Gene\_Symbol=Atpla3 Sodium/potassium-transporting ATPase subunit alpha-3
- [IPI00121038](#) Tax\_Id=10090 Gene\_Symbol=Vcan Isoform V0 of Versican core protein
- [IPI00621468](#) Tax\_Id=10090 Gene\_Symbol=Gm7866 similar to ubiquitin A-52 residue ribosomal protein fusion product 1
- [IPI00110850](#) Tax\_Id=10090 Gene\_Symbol=Actb Actin, cytoplasmic 1
- [IPI00136929](#) Tax\_Id=10090 Gene\_Symbol=Actg1 Gamma actin-like protein
- [IPI00123176](#) Tax\_Id=10090 Gene\_Symbol=Gm6316 Glyceraldehyde-3-phosphate dehydrogenase
- [IPI00114642](#) Tax\_Id=10090 Gene\_Symbol=Hist1h2bn;Hist1h2bl;Hist1h2bj;Hist1h2bf Histone H2B type 1-F/J/L
- [IPI00380227](#) Tax\_Id=10090 Gene\_Symbol=Nrgn Neurogranin
- [IPI00135106](#) Tax\_Id=10090 Gene\_Symbol=Mobp Isoform 1 of Myelin-associated oligodendrocyte basic protein
- [IPI00221528](#) Tax\_Id=10090 Gene\_Symbol=Actb12 Beta-actin-like protein 2
- [IPI00136703](#) Tax\_Id=10090 Gene\_Symbol=Ckb Creatine kinase B-type
- [IPI00404590](#) Tax\_Id=10090 Gene\_Symbol=Hlf0 Putative uncharacterized protein
- [IPI00131366](#) Tax\_Id=10090 Gene\_Symbol=Krt6b Keratin, type II cytoskeletal 6B
- [IPI00348094](#) Tax\_Id=10090 Gene\_Symbol=Tubb1 Tubulin, beta 1
- [IPI00229525](#) Tax\_Id=10090 Gene\_Symbol=Gnal Guanine nucleotide-binding protein G(olf) subunit alpha
- [IPI00118569](#) Tax\_Id=10090 Gene\_Symbol=Gna13 Guanine nucleotide-binding protein subunit alpha-13
- [IPI00119067](#) Tax\_Id=10090 Gene\_Symbol=Tppp Tubulin polymerization-promoting protein

### IPI\_mouse [Decoy](#) False discovery rate

| Peptide matches above identity threshold             | 111 | 2 | 1.80 % |
|------------------------------------------------------|-----|---|--------|
| Peptide matches above homology or identity threshold | 121 | 3 | 2.48 % |

### Probability Based Mowse Score

Ions score is  $-10 \cdot \log(P)$ , where P is the probability that the observed match is a random event.  
 Individual ions scores > 37 indicate identity or extensive homology ( $p < 0.01$ ).  
 Protein scores are derived from ions scores as a non-probabilistic basis for ranking protein hits.

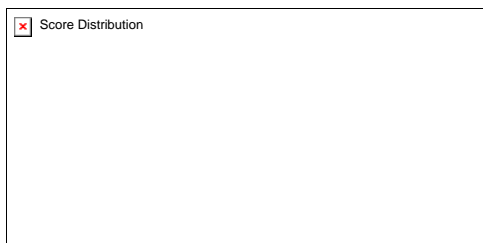

### Peptide Summary Report

Format As  [Help](#)  
 Significance threshold  $p < 0.01$  Max. number of hits   
 Standard scoring  MudPIT scoring  Ions score or expect cut-off  Show sub-sets   
 Show pop-ups  Suppress pop-ups  Sort unassigned   Require bold red   
    Error tolerant

1. [IPI00420725](#) Mass: 55882 Score: 921 Queries matched: 37 emPAI: 1.23  
 Tax\_Id=10090 Gene\_Symbol=Camk2a Uncharacterized protein  
 Check to include this hit in error tolerant search or archive report

| Query                                                   | Observed | Mr(expt)  | Mr(calc)  | ppm    | Miss | Score | Expect | Rank | Peptide        |
|---------------------------------------------------------|----------|-----------|-----------|--------|------|-------|--------|------|----------------|
| <input checked="" type="checkbox"/> <a href="#">155</a> | 445.2853 | 444.2780  | 444.2696  | 18.9   | 0    | 5     | 23     | 1    | K.GAAVK.L      |
| <input checked="" type="checkbox"/> <a href="#">414</a> | 432.7276 | 863.4406  | 863.4501  | -10.97 | 0    | 20    | 1.1    | 1    | R.SGAPSVLPH.-  |
| <a href="#">424</a>                                     | 446.2583 | 890.5020  | 890.5086  | -7.40  | 1    | 8     | 12     | 2    | K.GAFSVVRR.C   |
| <a href="#">441</a>                                     | 452.2508 | 902.4870  | 902.4895  | -2.74  | 0    | 4     | 41     | 2    | K.MLTINPSK.R   |
| <input checked="" type="checkbox"/> <a href="#">502</a> | 525.2626 | 1048.5106 | 1048.5553 | -42.57 | 0    | 53    | 0.0004 | 1    | K.VLAGQEYAAK.I |
| <a href="#">503</a>                                     | 525.2869 | 1048.5592 | 1048.5553 | 3.78   | 0    | (3)   | 38     | 3    | K.VLAGQEYAAK.I |
| <input checked="" type="checkbox"/> <a href="#">510</a> | 530.2837 | 1058.5528 | 1058.5906 | -35.68 | 1    | (40)  | 0.0088 | 1    | K.MLTINPSKR.I  |
| <input checked="" type="checkbox"/> <a href="#">511</a> | 530.2865 | 1058.5584 | 1058.5906 | -30.39 | 1    | (47)  | 0.002  | 1    | K.MLTINPSKR.I  |

|                                     |                     |           |           |           |        |   |      |          |   |                                 |
|-------------------------------------|---------------------|-----------|-----------|-----------|--------|---|------|----------|---|---------------------------------|
| <input checked="" type="checkbox"/> | <a href="#">512</a> | 530.2960  | 1058.5774 | 1058.5906 | -12.44 | 1 | (42) | 0.0056   | 1 | K.MLTINPSKR.I                   |
| <input checked="" type="checkbox"/> | <a href="#">513</a> | 530.3043  | 1058.5940 | 1058.5906 | 3.24   | 1 | 47   | 0.0014   | 1 | K.MLTINPSKR.I                   |
| <input checked="" type="checkbox"/> | <a href="#">529</a> | 538.2988  | 1074.5830 | 1074.5855 | -2.32  | 1 | (43) | 0.0044   | 1 | K.MLTINPSKR.I + Oxidation (M)   |
| <input checked="" type="checkbox"/> | <a href="#">530</a> | 538.3007  | 1074.5868 | 1074.5855 | 1.22   | 1 | (43) | 0.0046   | 1 | K.MLTINPSKR.I + Oxidation (M)   |
| <input checked="" type="checkbox"/> | <a href="#">531</a> | 538.3033  | 1074.5920 | 1074.5855 | 6.06   | 1 | (44) | 0.0033   | 1 | K.MLTINPSKR.I + Oxidation (M)   |
| <input checked="" type="checkbox"/> | <a href="#">554</a> | 574.3305  | 1146.6464 | 1146.6431 | 2.95   | 0 | (46) | 0.0012   | 1 | K.GAILTTMLATR.N                 |
| <input checked="" type="checkbox"/> | <a href="#">563</a> | 582.3281  | 1162.6416 | 1162.6380 | 3.15   | 0 | 83   | 2.8e-007 | 1 | K.GAILTTMLATR.N + Oxidation (M) |
| <input checked="" type="checkbox"/> | <a href="#">564</a> | 582.3326  | 1162.6506 | 1162.6380 | 10.9   | 0 | (10) | 5        | 1 | K.GAILTTMLATR.N + Oxidation (M) |
| <input checked="" type="checkbox"/> | <a href="#">601</a> | 631.2774  | 1260.5402 | 1260.5927 | -41.64 | 0 | (42) | 0.0017   | 1 | R.FYFENLWSR.N                   |
| <input checked="" type="checkbox"/> | <a href="#">602</a> | 631.2971  | 1260.5796 | 1260.5927 | -10.39 | 0 | 54   | 0.00022  | 1 | R.FYFENLWSR.N                   |
| <input checked="" type="checkbox"/> | <a href="#">603</a> | 631.2980  | 1260.5814 | 1260.5927 | -8.96  | 0 | (8)  | 9.1      | 1 | R.FYFENLWSR.N                   |
| <input checked="" type="checkbox"/> | <a href="#">630</a> | 652.3443  | 1302.6740 | 1302.6932 | -14.70 | 0 | (49) | 0.0011   | 1 | R.ITQYLDAGGIPR.T                |
| <input checked="" type="checkbox"/> | <a href="#">631</a> | 652.3544  | 1302.6942 | 1302.6932 | 0.81   | 0 | (61) | 5.6e-005 | 1 | R.ITQYLDAGGIPR.T                |
| <input checked="" type="checkbox"/> | <a href="#">632</a> | 652.3555  | 1302.6964 | 1302.6932 | 2.50   | 0 | 105  | 2.4e-009 | 1 | R.ITQYLDAGGIPR.T                |
| <input checked="" type="checkbox"/> | <a href="#">656</a> | 670.8677  | 1339.7208 | 1339.7711 | -37.49 | 0 | (77) | 1.1e-006 | 1 | R.DLKPENLLASK.L                 |
| <input checked="" type="checkbox"/> | <a href="#">657</a> | 670.8842  | 1339.7538 | 1339.7711 | -12.86 | 0 | 78   | 7.5e-007 | 1 | R.DLKPENLLASK.L                 |
| <input checked="" type="checkbox"/> | <a href="#">658</a> | 447.5925  | 1339.7557 | 1339.7711 | -11.49 | 0 | (59) | 6e-005   | 1 | R.DLKPENLLASK.L                 |
| <input checked="" type="checkbox"/> | <a href="#">799</a> | 816.8861  | 1631.7576 | 1631.7719 | -8.72  | 0 | 66   | 1.5e-005 | 1 | R.FTEEYQLFEELGK.G               |
| <input checked="" type="checkbox"/> | <a href="#">800</a> | 816.8922  | 1631.7698 | 1631.7719 | -1.25  | 0 | (64) | 2.3e-005 | 1 | R.FTEEYQLFEELGK.G               |
| <input checked="" type="checkbox"/> | <a href="#">801</a> | 816.8947  | 1631.7748 | 1631.7719 | 1.82   | 0 | (7)  | 12       | 1 | R.FTEEYQLFEELGK.G               |
| <input checked="" type="checkbox"/> | <a href="#">802</a> | 816.8953  | 1631.7760 | 1631.7719 | 2.55   | 0 | (63) | 3.3e-005 | 1 | R.FTEEYQLFEELGK.G               |
| <input checked="" type="checkbox"/> | <a href="#">832</a> | 1040.9640 | 2079.9134 | 2079.9426 | -13.99 | 0 | 78   | 5.2e-007 | 1 | K.AGAYDFPSPEDVTVPEAK.D          |
| <input checked="" type="checkbox"/> | <a href="#">908</a> | 783.7256  | 2348.1550 | 2348.1689 | -5.91  | 1 | (26) | 0.13     | 1 | R.FTEEYQLFEELGKGFVSVV.R         |
| <input checked="" type="checkbox"/> | <a href="#">909</a> | 783.7288  | 2348.1646 | 2348.1689 | -1.82  | 1 | 125  | 1.7e-011 | 1 | R.FTEEYQLFEELGKGFVSVV.R         |
| <input checked="" type="checkbox"/> | <a href="#">910</a> | 783.7297  | 2348.1673 | 2348.1689 | -0.67  | 1 | (52) | 0.00031  | 1 | R.FTEEYQLFEELGKGFVSVV.R         |
| <input checked="" type="checkbox"/> | <a href="#">928</a> | 888.7346  | 2663.1820 | 2663.2755 | -35.12 | 1 | (94) | 1.1e-008 | 1 | K.AGAYDFPSPEDVTVPEAKDLINK.M     |
| <input checked="" type="checkbox"/> | <a href="#">929</a> | 1332.6436 | 2663.2726 | 2663.2755 | -1.07  | 1 | (59) | 5.1e-005 | 1 | K.AGAYDFPSPEDVTVPEAKDLINK.M     |
| <input checked="" type="checkbox"/> | <a href="#">930</a> | 888.7660  | 2663.2762 | 2663.2755 | 0.25   | 1 | 100  | 4.3e-009 | 1 | K.AGAYDFPSPEDVTVPEAKDLINK.M     |
| <input checked="" type="checkbox"/> | <a href="#">931</a> | 888.7662  | 2663.2768 | 2663.2755 | 0.48   | 1 | (95) | 1.3e-008 | 1 | K.AGAYDFPSPEDVTVPEAKDLINK.M     |

## Proteins matching the same set of peptides:

[IPI00621806](#) Mass: 54651 Score: 921 Queries matched: 37

Tax\_Id=10090 Gene\_Symbol=Camk2a Isoform Alpha CaMKII of Calcium/calmodulin-dependent protein kinase type II subunit alpha

2. [IPI00474502](#) Mass: 61164 Score: 816 Queries matched: 31 emPAI: 1.57

Tax\_Id=10090 Gene\_Symbol=Camk2b Calcium/calmodulin-dependent protein kinase type II subunit beta

Check to include this hit in error tolerant search or archive report

| Query                               | Observed            | Mr(expt)  | Mr(calc)  | ppm       | Miss   | Score | Expect | Rank     | Peptide       |                                              |
|-------------------------------------|---------------------|-----------|-----------|-----------|--------|-------|--------|----------|---------------|----------------------------------------------|
| <a href="#">155</a>                 | 445.2853            | 444.2780  | 444.2696  | 18.9      | 0      | 5     | 23     | 1        | K.GAAVK.L     |                                              |
| <a href="#">424</a>                 | 446.2583            | 890.5020  | 890.5086  | -7.40     | 1      | 8     | 12     | 2        | K.GAFVSVV.R.C |                                              |
| <input checked="" type="checkbox"/> | <a href="#">489</a> | 510.2411  | 1018.4676 | 1018.4688 | -1.14  | 0     | 37     | 0.011    | 1             | R.STVASMHR.Q                                 |
| <input checked="" type="checkbox"/> | <a href="#">495</a> | 518.2553  | 1034.4960 | 1034.4637 | 31.2   | 0     | (28)   | 0.13     | 1             | R.STVASMHR.Q + Oxidation (M)                 |
| <input checked="" type="checkbox"/> | <a href="#">552</a> | 572.8067  | 1143.5988 | 1143.5964 | 2.12   | 0     | (22)   | 0.54     | 1             | R.FYFENLLAK.N                                |
| <input checked="" type="checkbox"/> | <a href="#">553</a> | 572.8070  | 1143.5994 | 1143.5964 | 2.65   | 0     | 23     | 0.44     | 1             | R.FYFENLLAK.N                                |
| <input checked="" type="checkbox"/> | <a href="#">554</a> | 574.3305  | 1146.6464 | 1146.6431 | 2.95   | 0     | (46)   | 0.0012   | 1             | K.GAILTTMLATR.N                              |
| <input checked="" type="checkbox"/> | <a href="#">563</a> | 582.3281  | 1162.6416 | 1162.6380 | 3.15   | 0     | 83     | 2.8e-007 | 1             | K.GAILTTMLATR.N + Oxidation (M)              |
| <input checked="" type="checkbox"/> | <a href="#">564</a> | 582.3326  | 1162.6506 | 1162.6380 | 10.9   | 0     | (10)   | 5        | 1             | K.GAILTTMLATR.N + Oxidation (M)              |
| <input checked="" type="checkbox"/> | <a href="#">596</a> | 623.3240  | 1244.6334 | 1244.6361 | -2.11  | 0     | 63     | 4e-005   | 1             | K.ADGVKPQTNSTK.N                             |
| <input checked="" type="checkbox"/> | <a href="#">656</a> | 670.8677  | 1339.7208 | 1339.7711 | -37.49 | 0     | (77)   | 1.1e-006 | 1             | R.DLKPENLLASK.C                              |
| <input checked="" type="checkbox"/> | <a href="#">657</a> | 670.8842  | 1339.7538 | 1339.7711 | -12.86 | 0     | 78     | 7.5e-007 | 1             | R.DLKPENLLASK.C                              |
| <input checked="" type="checkbox"/> | <a href="#">658</a> | 447.5925  | 1339.7557 | 1339.7711 | -11.49 | 0     | (59)   | 6e-005   | 1             | R.DLKPENLLASK.C                              |
| <input checked="" type="checkbox"/> | <a href="#">680</a> | 458.5831  | 1372.7275 | 1372.7310 | -2.59  | 1     | (2)    | 51       | 7             | K.KADGKVPQTNSTK.N                            |
| <input checked="" type="checkbox"/> | <a href="#">681</a> | 687.3759  | 1372.7372 | 1372.7310 | 4.53   | 1     | 41     | 0.0061   | 1             | K.KADGKVPQTNSTK.N                            |
| <input checked="" type="checkbox"/> | <a href="#">688</a> | 468.5813  | 1402.7221 | 1402.7317 | -6.87  | 0     | (26)   | 0.16     | 1             | R.LTQYIDGQGRPR.T                             |
| <input checked="" type="checkbox"/> | <a href="#">689</a> | 468.5816  | 1402.7230 | 1402.7317 | -6.23  | 0     | (40)   | 0.0067   | 1             | R.LTQYIDGQGRPR.T                             |
| <input checked="" type="checkbox"/> | <a href="#">690</a> | 702.3738  | 1402.7330 | 1402.7317 | 0.96   | 0     | (37)   | 0.015    | 1             | R.LTQYIDGQGRPR.T                             |
| <input checked="" type="checkbox"/> | <a href="#">691</a> | 702.3776  | 1402.7406 | 1402.7317 | 6.38   | 0     | 51     | 0.00048  | 1             | R.LTQYIDGQGRPR.T                             |
| <input checked="" type="checkbox"/> | <a href="#">707</a> | 743.4136  | 1484.8126 | 1484.8021 | 7.13   | 0     | 75     | 1.7e-006 | 1             | K.NLINQMLTINPAK.R + Oxidation (M)            |
| <input checked="" type="checkbox"/> | <a href="#">786</a> | 810.8771  | 1619.7396 | 1619.7355 | 2.56   | 0     | 66     | 1.4e-005 | 1             | R.FTDEYQLYEDIGK.G                            |
| <input checked="" type="checkbox"/> | <a href="#">787</a> | 810.8881  | 1619.7616 | 1619.7355 | 16.1   | 0     | (29)   | 0.068    | 1             | R.FTDEYQLYEDIGK.G                            |
| <input checked="" type="checkbox"/> | <a href="#">794</a> | 542.6372  | 1624.8898 | 1624.9082 | -11.37 | 1     | 89     | 5.7e-008 | 1             | K.NLINQMLTINPAK.R.I                          |
| <input checked="" type="checkbox"/> | <a href="#">795</a> | 813.4636  | 1624.9126 | 1624.9082 | 2.71   | 1     | (55)   | 9.8e-005 | 1             | K.NLINQMLTINPAK.R.I                          |
| <input checked="" type="checkbox"/> | <a href="#">883</a> | 1040.9640 | 2079.9134 | 2079.9426 | -13.99 | 0     | 78     | 5.2e-007 | 1             | K.AGAYDFPSPEDVTVPEAK.N                       |
| <input checked="" type="checkbox"/> | <a href="#">890</a> | 1056.9772 | 2111.9398 | 2112.0011 | -29.00 | 0     | (1)    | 25       | 1             | K.TTEQLIEAVNNGDFEAYAK.I                      |
| <input checked="" type="checkbox"/> | <a href="#">891</a> | 1057.0093 | 2112.0040 | 2112.0011 | 1.40   | 0     | 95     | 1.6e-008 | 1             | K.TTEQLIEAVNNGDFEAYAK.I                      |
| <input checked="" type="checkbox"/> | <a href="#">906</a> | 779.7075  | 2336.1007 | 2336.1325 | -13.61 | 1     | (59)   | 5.7e-005 | 1             | R.FTDEYQLYEDIGKGFVSVV.R                      |
| <input checked="" type="checkbox"/> | <a href="#">907</a> | 779.7144  | 2336.1214 | 2336.1325 | -4.75  | 1     | 124    | 1.7e-011 | 1             | R.FTDEYQLYEDIGKGFVSVV.R                      |
| <input checked="" type="checkbox"/> | <a href="#">911</a> | 1177.0757 | 2352.1368 | 2352.1301 | 2.86   | 0     | 128    | 7.5e-012 | 1             | R.QTTAPATMSTAASGTTMGLVEQAK.S                 |
| <input checked="" type="checkbox"/> | <a href="#">912</a> | 1185.0782 | 2368.1418 | 2368.1250 | 7.10   | 0     | (118)  | 6.1e-011 | 1             | R.QTTAPATMSTAASGTTMGLVEQAK.S + Oxidation (M) |

## Proteins matching the same set of peptides:

[IPI00649778](#) Mass: 73827 Score: 816 Queries matched: 31

Tax\_Id=10090 Gene\_Symbol=Camk2b Calcium/calmodulin-dependent protein kinase II, beta, isoform CRA\_b

[IPI00875723](#) Mass: 68686 Score: 816 Queries matched: 31

Tax\_Id=10090 Gene\_Symbol=Camk2b 68 kDa protein

3. [IPI00117352](#) Mass: 50095 Score: 504 Queries matched: 18 emPAI: 1.15

Tax\_Id=10090 Gene\_Symbol=Tubb5 Tubulin beta-5 chain

Check to include this hit in error tolerant search or archive report

| Query | Observed | Mr(expt) | Mr(calc) | ppm | Miss | Score | Expect | Rank | Peptide |
|-------|----------|----------|----------|-----|------|-------|--------|------|---------|
|-------|----------|----------|----------|-----|------|-------|--------|------|---------|

|                                     |     |           |           |           |        |   |      |          |   |                                     |
|-------------------------------------|-----|-----------|-----------|-----------|--------|---|------|----------|---|-------------------------------------|
| <input checked="" type="checkbox"/> | 557 | 580.3218  | 1158.6290 | 1158.6219 | 6.13   | 0 | 48   | 0.0012   | 1 | K.LAVNMFVPPR.L + Oxidation (M)      |
| <input checked="" type="checkbox"/> | 643 | 660.3592  | 1318.7038 | 1318.6955 | 6.32   | 0 | 63   | 3.3e-005 | 1 | R.IMNTFSVVPSPK.V                    |
| <input checked="" type="checkbox"/> | 653 | 668.3525  | 1334.6904 | 1334.6904 | 0.01   | 0 | (8)  | 12       | 1 | R.IMNTFSVVPSPK.V + Oxidation (M)    |
| <input checked="" type="checkbox"/> | 654 | 668.3532  | 1334.6918 | 1334.6904 | 1.06   | 0 | (4)  | 28       | 4 | R.IMNTFSVVPSPK.V + Oxidation (M)    |
| <input checked="" type="checkbox"/> | 783 | 808.4200  | 1614.8254 | 1614.8287 | -2.02  | 0 | (49) | 0.00091  | 1 | R.AILVDLEPGTMDSVR.S                 |
| <input checked="" type="checkbox"/> | 788 | 540.9453  | 1619.8141 | 1619.8283 | -8.76  | 0 | (53) | 0.00031  | 1 | R.LHFFMPGFAPLTSR.G                  |
| <input checked="" type="checkbox"/> | 789 | 810.9224  | 1619.8302 | 1619.8283 | 1.23   | 0 | 57   | 0.00013  | 1 | R.LHFFMPGFAPLTSR.G                  |
| <input checked="" type="checkbox"/> | 790 | 810.9226  | 1619.8306 | 1619.8283 | 1.47   | 0 | (45) | 0.0019   | 1 | R.LHFFMPGFAPLTSR.G                  |
| <input checked="" type="checkbox"/> | 797 | 816.4169  | 1630.8192 | 1630.8236 | -2.68  | 0 | 59   | 0.0001   | 1 | R.AILVDLEPGTMDSVR.S + Oxidation (M) |
| <input checked="" type="checkbox"/> | 808 | 830.4500  | 1658.8854 | 1658.8879 | -1.50  | 0 | 62   | 3.2e-005 | 1 | R.ALTVPQLTQVFDK.N                   |
| <input checked="" type="checkbox"/> | 819 | 848.9158  | 1695.8170 | 1695.8257 | -5.07  | 0 | 64   | 2.6e-005 | 1 | K.NSSYFVEWIPNVK.T                   |
| <input checked="" type="checkbox"/> | 820 | 848.9227  | 1695.8308 | 1695.8257 | 3.06   | 0 | (47) | 0.0013   | 1 | K.NSSYFVEWIPNVK.T                   |
| <input checked="" type="checkbox"/> | 877 | 653.6544  | 1957.9414 | 1957.9745 | -16.94 | 0 | (41) | 0.0039   | 1 | K.GHYTEGAEVLVSLDVVR.K               |
| <input checked="" type="checkbox"/> | 878 | 980.0190  | 1958.0234 | 1957.9745 | 25.0   | 0 | 101  | 4.2e-009 | 1 | K.GHYTEGAEVLVSLDVVR.K               |
| <input checked="" type="checkbox"/> | 936 | 933.4480  | 2797.3222 | 2797.3361 | -4.99  | 0 | (89) | 4.3e-008 | 1 | R.SGPFQGIIFRPDNFVFGQSGAGNNWAK.G     |
| <input checked="" type="checkbox"/> | 937 | 933.4524  | 2797.3354 | 2797.3361 | -0.27  | 0 | 99   | 5.2e-009 | 1 | R.SGPFQGIIFRPDNFVFGQSGAGNNWAK.G     |
| <input checked="" type="checkbox"/> | 938 | 1399.6794 | 2797.3442 | 2797.3361 | 2.91   | 0 | (71) | 2.9e-006 | 1 | R.SGPFQGIIFRPDNFVFGQSGAGNNWAK.G     |
| <input checked="" type="checkbox"/> | 939 | 933.4583  | 2797.3531 | 2797.3361 | 6.06   | 0 | (34) | 0.016    | 1 | R.SGPFQGIIFRPDNFVFGQSGAGNNWAK.G     |

4. [IPI00112584](#) Mass: 56961 Score: 475 Queries matched: 21 emPAI: 0.66  
 Tax\_Id=10090 Gene\_Symbol=Camk2d Isoform 1 of Calcium/calmodulin-dependent protein kinase type II subunit delta  
 Check to include this hit in error tolerant search or archive report

| Query                               | Observed            | Mr(expt)  | Mr(calc)  | ppm       | Miss  | Score | Expect   | Rank    | Peptide                         |                          |
|-------------------------------------|---------------------|-----------|-----------|-----------|-------|-------|----------|---------|---------------------------------|--------------------------|
| <a href="#">155</a>                 | 445.2853            | 444.2780  | 444.2696  | 18.9      | 0     | 5     | 23       | 1       | K.GAAVK.L                       |                          |
| <a href="#">424</a>                 | 446.2583            | 890.5020  | 890.5086  | -7.40     | 1     | 8     | 12       | 2       | K.GAFSVVRR.C                    |                          |
| <a href="#">489</a>                 | 510.2411            | 1018.4676 | 1018.4688 | -1.14     | 0     | 37    | 0.011    | 1       | R.STVASMMHR.Q                   |                          |
| <a href="#">495</a>                 | 518.2553            | 1034.4960 | 1034.4637 | 31.2      | 0     | (28)  | 0.13     | 1       | R.STVASMMHR.Q + Oxidation (M)   |                          |
| <a href="#">510</a>                 | 530.2837            | 1058.5528 | 1058.5906 | -35.68    | 1     | 6     | 24       | 3       | K.MLTINPAKR.I + Oxidation (M)   |                          |
| <a href="#">513</a>                 | 530.3043            | 1058.5940 | 1058.5906 | 3.24      | 1     | (5)   | 20       | 8       | K.MLTINPAKR.I + Oxidation (M)   |                          |
| <input checked="" type="checkbox"/> | <a href="#">547</a> | 559.7811  | 1117.5476 | 1117.5444 | 2.92  | 0     | 20       | 0.77    | 1                               | R.FYFENALSK.S            |
| <input checked="" type="checkbox"/> | <a href="#">548</a> | 559.7846  | 1117.5546 | 1117.5444 | 9.18  | 0     | (17)     | 1.8     | 1                               | R.FYFENALSK.S            |
| <a href="#">554</a>                 | 574.3305            | 1146.6464 | 1146.6431 | 2.95      | 0     | (46)  | 0.0012   | 1       | K.GAILTTMLATR.N                 |                          |
| <a href="#">563</a>                 | 582.3281            | 1162.6416 | 1162.6380 | 3.15      | 0     | 83    | 2.8e-007 | 1       | K.GAILTTMLATR.N + Oxidation (M) |                          |
| <a href="#">564</a>                 | 582.3326            | 1162.6506 | 1162.6380 | 10.9      | 0     | (10)  | 5        | 1       | K.GAILTTMLATR.N + Oxidation (M) |                          |
| <a href="#">656</a>                 | 670.8677            | 1339.7208 | 1339.7711 | -37.49    | 0     | (77)  | 1.1e-006 | 1       | R.DLKPENLLLASK.S                |                          |
| <a href="#">657</a>                 | 670.8842            | 1339.7538 | 1339.7711 | -12.86    | 0     | 78    | 7.5e-007 | 1       | R.DLKPENLLLASK.S                |                          |
| <a href="#">658</a>                 | 447.5925            | 1339.7557 | 1339.7711 | -11.49    | 0     | (59)  | 6e-005   | 1       | R.DLKPENLLLASK.S                |                          |
| <input checked="" type="checkbox"/> | <a href="#">785</a> | 809.8809  | 1617.7472 | 1617.7562 | -5.56 | 0     | 52       | 0.00035 | 1                               | R.FTDEYQLFEELGK.G        |
| <a href="#">883</a>                 | 1040.9640           | 2079.9134 | 2079.9426 | -13.99    | 0     | 78    | 5.2e-007 | 1       | K.AGAYDFPSPEDVTPEAK.D           |                          |
| <input checked="" type="checkbox"/> | <a href="#">905</a> | 779.0534  | 2334.1384 | 2334.1532 | -6.36 | 1     | 26       | 0.11    | 1                               | R.FTDEYQLFEELGKGAFSVVR.R |
| <a href="#">928</a>                 | 888.7346            | 2663.1820 | 2663.2755 | -35.12    | 1     | (94)  | 1.1e-008 | 1       | K.AGAYDFPSPEDVTPEAKDLINK.M      |                          |
| <a href="#">929</a>                 | 1332.6436           | 2663.2726 | 2663.2755 | -1.07     | 1     | (59)  | 5.1e-005 | 1       | K.AGAYDFPSPEDVTPEAKDLINK.M      |                          |
| <a href="#">930</a>                 | 888.7660            | 2663.2762 | 2663.2755 | 0.25      | 1     | 100   | 4.3e-009 | 1       | K.AGAYDFPSPEDVTPEAKDLINK.M      |                          |
| <a href="#">931</a>                 | 888.7662            | 2663.2768 | 2663.2755 | 0.48      | 1     | (95)  | 1.3e-008 | 1       | K.AGAYDFPSPEDVTPEAKDLINK.M      |                          |

Proteins matching the same set of peptides:

[IPI00406790](#) Mass: 60593 Score: 475 Queries matched: 21  
 Tax\_Id=10090 Gene\_Symbol=Camk2d Isoform 4 of Calcium/calmodulin-dependent protein kinase type II subunit delta  
[IPI00475044](#) Mass: 55899 Score: 475 Queries matched: 21  
 Tax\_Id=10090 Gene\_Symbol=Camk2d Isoform 2 of Calcium/calmodulin-dependent protein kinase type II subunit delta  
[IPI00828919](#) Mass: 58492 Score: 475 Queries matched: 21  
 Tax\_Id=10090 Gene\_Symbol=Camk2d Isoform 3 of Calcium/calmodulin-dependent protein kinase type II subunit delta  
[IPI00857865](#) Mass: 54664 Score: 475 Queries matched: 21  
 Tax\_Id=10090 Gene\_Symbol=Camk2d Putative uncharacterized protein  
[IPI00858128](#) Mass: 58283 Score: 475 Queries matched: 21  
 Tax\_Id=10090 Gene\_Symbol=Camk2d calcium/calmodulin-dependent protein kinase type II subunit delta isoform 1  
[IPI00858144](#) Mass: 55828 Score: 475 Queries matched: 21  
 Tax\_Id=10090 Gene\_Symbol=Camk2d 55 kDa protein

5. [IPI00608020](#) Mass: 20817 Score: 452 Queries matched: 12 emPAI: 1.11  
 Tax\_Id=10090 Gene\_Symbol=Ft11 ferritin light chain 1  
 Check to include this hit in error tolerant search or archive report

| Query                               | Observed            | Mr(expt) | Mr(calc)  | ppm       | Miss   | Score | Expect | Rank     | Peptide |                                   |
|-------------------------------------|---------------------|----------|-----------|-----------|--------|-------|--------|----------|---------|-----------------------------------|
| <input checked="" type="checkbox"/> | <a href="#">633</a> | 652.8418 | 1303.6690 | 1303.6633 | 4.42   | 1     | 29     | 0.097    | 1       | R.LLEFQNDRGR.A                    |
| <input checked="" type="checkbox"/> | <a href="#">705</a> | 740.8561 | 1479.6976 | 1479.6954 | 1.55   | 0     | (90)   | 6.4e-008 | 1       | R.QNYSTEVEAAVNR.L                 |
| <input checked="" type="checkbox"/> | <a href="#">706</a> | 740.8602 | 1479.7058 | 1479.6954 | 7.09   | 0     | 95     | 1.8e-008 | 1       | R.QNYSTEVEAAVNR.L                 |
| <input checked="" type="checkbox"/> | <a href="#">829</a> | 569.3081 | 1704.9025 | 1704.9271 | -14.43 | 0     | 84     | 2e-007   | 1       | K.NLNQALLDLHALGSAR.A              |
| <input checked="" type="checkbox"/> | <a href="#">830</a> | 569.3106 | 1704.9100 | 1704.9271 | -10.03 | 0     | (83)   | 2.1e-007 | 1       | K.NLNQALLDLHALGSAR.A              |
| <input checked="" type="checkbox"/> | <a href="#">831</a> | 853.4784 | 1704.9422 | 1704.9271 | 8.90   | 0     | (32)   | 0.018    | 1       | K.NLNQALLDLHALGSAR.A              |
| <input checked="" type="checkbox"/> | <a href="#">832</a> | 853.4784 | 1704.9422 | 1704.9271 | 8.90   | 0     | (31)   | 0.027    | 1       | K.NLNQALLDLHALGSAR.A              |
| <input checked="" type="checkbox"/> | <a href="#">919</a> | 843.7637 | 2528.2693 | 2528.2772 | -3.13  | 1     | 84     | 1.4e-007 | 1       | R.RVAGPQPAQTGAPQGSGLGEYLFER.L     |
| <input checked="" type="checkbox"/> | <a href="#">953</a> | 820.6315 | 3278.4969 | 3278.5587 | -18.86 | 1     | (72)   | 1.3e-006 | 1       | R.ALFQDVQKPSQDEWGKTQEAMEAALAMEK.N |
| <input checked="" type="checkbox"/> | <a href="#">954</a> | 820.6387 | 3278.5257 | 3278.5587 | -10.07 | 1     | (20)   | 0.28     | 1       | R.ALFQDVQKPSQDEWGKTQEAMEAALAMEK.N |
| <input checked="" type="checkbox"/> | <a href="#">955</a> | 820.6396 | 3278.5293 | 3278.5587 | -8.97  | 1     | (79)   | 3.8e-007 | 1       | R.ALFQDVQKPSQDEWGKTQEAMEAALAMEK.N |
| <input checked="" type="checkbox"/> | <a href="#">957</a> | 820.6479 | 3278.5625 | 3278.5587 | 1.15   | 1     | 84     | 1.1e-007 | 1       | R.ALFQDVQKPSQDEWGKTQEAMEAALAMEK.N |

Proteins matching the same set of peptides:

[IPI00762203](#) Mass: 20847 Score: 452 Queries matched: 12  
 Tax\_Id=10090 Gene\_Symbol=Ft11 Ferritin light chain 1

6. [IPI00109061](#) Mass: 50377 Score: 449 Queries matched: 16 emPAI: 0.88

Tax\_Id=10090 Gene\_Symbol=Tubb2b Tubulin beta-2B chain

 Check to include this hit in error tolerant search or archive report

| Query                                                   | Observed        | Mr(expt)         | Mr(calc)         | ppm           | Miss     | Score     | Expect       | Rank     | Peptide                              |
|---------------------------------------------------------|-----------------|------------------|------------------|---------------|----------|-----------|--------------|----------|--------------------------------------|
| <a href="#">557</a>                                     | 580.3218        | 1158.6290        | 1158.6219        | 6.13          | 0        | 48        | 0.0012       | 1        | K.LAVNMVPPFR.L + Oxidation (M)       |
| <a href="#">783</a>                                     | 808.4200        | 1614.8254        | 1614.8287        | -2.02         | 0        | (49)      | 0.00091      | 1        | R.AILVDLEPGTMDSVR.S                  |
| <a href="#">788</a>                                     | 540.9453        | 1619.8141        | 1619.8283        | -8.76         | 0        | (53)      | 0.00031      | 1        | R.LHFFMPGFAPLTSR.G                   |
| <a href="#">789</a>                                     | 810.9224        | 1619.8302        | 1619.8283        | 1.23          | 0        | 57        | 0.00013      | 1        | R.LHFFMPGFAPLTSR.G                   |
| <a href="#">790</a>                                     | 810.9226        | 1619.8306        | 1619.8283        | 1.47          | 0        | (45)      | 0.0019       | 1        | R.LHFFMPGFAPLTSR.G                   |
| <a href="#">797</a>                                     | 816.4169        | 1630.8192        | 1630.8236        | -2.68         | 0        | 59        | 0.0001       | 1        | R.AILVDLEPGTMDSVR.S + Oxidation (M)  |
| <a href="#">819</a>                                     | 848.9158        | 1695.8170        | 1695.8257        | -5.07         | 0        | 64        | 2.6e-005     | 1        | K.NSSYFVEWIPNNVK.T                   |
| <a href="#">820</a>                                     | 848.9227        | 1695.8308        | 1695.8257        | 3.06          | 0        | (47)      | 0.0013       | 1        | K.NSSYFVEWIPNNVK.T                   |
| <a href="#">833</a>                                     | <b>854.4404</b> | <b>1706.8662</b> | <b>1706.8549</b> | <b>6.64</b>   | <b>0</b> | <b>28</b> | <b>0.092</b> | <b>2</b> | <b>R.ALTVPQLTQQMFDK.N</b>            |
| <a href="#">877</a>                                     | 653.6544        | 1957.9414        | 1957.9745        | -16.94        | 0        | (41)      | 0.0039       | 1        | K.GHYTEGAEVLVSDVLR.K                 |
| <a href="#">878</a>                                     | 980.0190        | 1958.0234        | 1957.9745        | 25.0          | 0        | 101       | 4.2e-009     | 1        | K.GHYTEGAEVLVSDVLR.K                 |
| <a href="#">936</a>                                     | 933.4480        | 2797.3222        | 2797.3361        | -4.99         | 0        | (89)      | 4.3e-008     | 1        | R.SGPFQIFRPDNFVFGQSGAGNNWAK.G        |
| <a href="#">937</a>                                     | 933.4524        | 2797.3354        | 2797.3361        | -0.27         | 0        | 99        | 5.2e-009     | 1        | R.SGPFQIFRPDNFVFGQSGAGNNWAK.G        |
| <a href="#">938</a>                                     | 1399.6794       | 2797.3442        | 2797.3361        | 2.91          | 0        | (71)      | 2.9e-006     | 1        | R.SGPFQIFRPDNFVFGQSGAGNNWAK.G        |
| <a href="#">939</a>                                     | 933.4583        | 2797.3531        | 2797.3361        | 6.06          | 0        | (34)      | 0.016        | 1        | R.SGPFQIFRPDNFVFGQSGAGNNWAK.G        |
| <input checked="" type="checkbox"/> <a href="#">951</a> | <b>776.3458</b> | <b>3101.3541</b> | <b>3101.4003</b> | <b>-14.89</b> | <b>0</b> | <b>9</b>  | <b>2.8</b>   | <b>1</b> | <b>K.FWEVISDEHGIDPTGSHGSDLQLER.I</b> |

Proteins matching the same set of peptides:

[IPI00338039](#) Mass: 50274 Score: 449 Queries matched: 16

Tax\_Id=10090 Gene\_Symbol=Tubb2a Tubulin beta-2A chain

7. [IPI00169463](#) Mass: 50255 Score: 446 Queries matched: 17 emPAI: 1.01

Tax\_Id=10090 Gene\_Symbol=Tubb2c Tubulin beta-2C chain

 Check to include this hit in error tolerant search or archive report

| Query                                                   | Observed        | Mr(expt)         | Mr(calc)         | ppm          | Miss     | Score       | Expect        | Rank     | Peptide                                   |
|---------------------------------------------------------|-----------------|------------------|------------------|--------------|----------|-------------|---------------|----------|-------------------------------------------|
| <a href="#">557</a>                                     | 580.3218        | 1158.6290        | 1158.6219        | 6.13         | 0        | 48          | 0.0012        | 1        | K.LAVNMVPPFR.L + Oxidation (M)            |
| <a href="#">643</a>                                     | 660.3592        | 1318.7038        | 1318.6955        | 6.32         | 0        | 63          | 3.3e-005      | 1        | R.IMNTFVSPK.V                             |
| <a href="#">653</a>                                     | 668.3525        | 1334.6904        | 1334.6904        | 0.01         | 0        | (8)         | 12            | 1        | R.IMNTFVSPK.V + Oxidation (M)             |
| <a href="#">654</a>                                     | 668.3532        | 1334.6918        | 1334.6904        | 1.06         | 0        | (4)         | 28            | 4        | R.IMNTFVSPK.V + Oxidation (M)             |
| <a href="#">788</a>                                     | 540.9453        | 1619.8141        | 1619.8283        | -8.76        | 0        | (53)        | 0.00031       | 1        | R.LHFFMPGFAPLTSR.G                        |
| <a href="#">789</a>                                     | 810.9224        | 1619.8302        | 1619.8283        | 1.23         | 0        | 57          | 0.00013       | 1        | R.LHFFMPGFAPLTSR.G                        |
| <a href="#">790</a>                                     | 810.9226        | 1619.8306        | 1619.8283        | 1.47         | 0        | (45)        | 0.0019        | 1        | R.LHFFMPGFAPLTSR.G                        |
| <input checked="" type="checkbox"/> <a href="#">816</a> | <b>846.4307</b> | <b>1690.8468</b> | <b>1690.8600</b> | <b>-7.78</b> | <b>0</b> | <b>43</b>   | <b>0.0034</b> | <b>1</b> | <b>R.ALTVPQLTQQMFDK.N</b>                 |
| <a href="#">819</a>                                     | 848.9158        | 1695.8170        | 1695.8257        | -5.07        | 0        | 64          | 2.6e-005      | 1        | K.NSSYFVEWIPNNVK.T                        |
| <a href="#">820</a>                                     | 848.9227        | 1695.8308        | 1695.8257        | 3.06         | 0        | (47)        | 0.0013        | 1        | K.NSSYFVEWIPNNVK.T                        |
| <input checked="" type="checkbox"/> <a href="#">833</a> | <b>854.4404</b> | <b>1706.8662</b> | <b>1706.8549</b> | <b>6.64</b>  | <b>0</b> | <b>(38)</b> | <b>0.0095</b> | <b>1</b> | <b>R.ALTVPQLTQQMFDK.N + Oxidation (M)</b> |
| <a href="#">877</a>                                     | 653.6544        | 1957.9414        | 1957.9745        | -16.94       | 0        | (41)        | 0.0039        | 1        | K.GHYTEGAEVLVSDVLR.K                      |
| <a href="#">878</a>                                     | 980.0190        | 1958.0234        | 1957.9745        | 25.0         | 0        | 101         | 4.2e-009      | 1        | K.GHYTEGAEVLVSDVLR.K                      |
| <a href="#">936</a>                                     | 933.4480        | 2797.3222        | 2797.3361        | -4.99        | 0        | (89)        | 4.3e-008      | 1        | R.SGPFQIFRPDNFVFGQSGAGNNWAK.G             |
| <a href="#">937</a>                                     | 933.4524        | 2797.3354        | 2797.3361        | -0.27        | 0        | 99          | 5.2e-009      | 1        | R.SGPFQIFRPDNFVFGQSGAGNNWAK.G             |
| <a href="#">938</a>                                     | 1399.6794       | 2797.3442        | 2797.3361        | 2.91         | 0        | (71)        | 2.9e-006      | 1        | R.SGPFQIFRPDNFVFGQSGAGNNWAK.G             |
| <a href="#">939</a>                                     | 933.4583        | 2797.3531        | 2797.3361        | 6.06         | 0        | (34)        | 0.016         | 1        | R.SGPFQIFRPDNFVFGQSGAGNNWAK.G             |

8. [IPI00124695](#) Mass: 60254 Score: 412 Queries matched: 18 emPAI: 0.79

Tax\_Id=10090 Gene\_Symbol=Camk2g Isoform 1 of Calcium/calmodulin-dependent protein kinase type II subunit gamma

 Check to include this hit in error tolerant search or archive report

| Query                                                   | Observed        | Mr(expt)         | Mr(calc)         | ppm           | Miss     | Score     | Expect          | Rank     | Peptide                           |
|---------------------------------------------------------|-----------------|------------------|------------------|---------------|----------|-----------|-----------------|----------|-----------------------------------|
| <a href="#">155</a>                                     | 445.2853        | 444.2780         | 444.2696         | 18.9          | 0        | 5         | 23              | 1        | K.GAAVK.L                         |
| <a href="#">424</a>                                     | 446.2583        | 890.5020         | 890.5086         | -7.40         | 1        | 8         | 12              | 2        | K.GAFSVVRR.C                      |
| <a href="#">489</a>                                     | 510.2411        | 1018.4676        | 1018.4688        | -1.14         | 0        | 37        | 0.011           | 1        | R.STVASMMHR.Q                     |
| <a href="#">495</a>                                     | 518.2553        | 1034.4960        | 1034.4637        | 31.2          | 0        | (28)      | 0.13            | 1        | R.STVASMMHR.Q + Oxidation (M)     |
| <input checked="" type="checkbox"/> <a href="#">549</a> | <b>563.7897</b> | <b>1125.5648</b> | <b>1125.5666</b> | <b>-1.53</b>  | <b>1</b> | <b>50</b> | <b>0.00076</b>  | <b>1</b> | <b>K.KTSTQEYAAK.I</b>             |
| <a href="#">558</a>                                     | 580.8033        | 1159.5920        | 1159.5913        | 0.61          | 0        | 2         | 56              | 6        | K.FYFENLLSK.N                     |
| <a href="#">656</a>                                     | 670.8677        | 1339.7208        | 1339.7711        | -37.49        | 0        | (77)      | 1.1e-006        | 1        | R.DLKPENLLLASK.C                  |
| <a href="#">657</a>                                     | 670.8842        | 1339.7538        | 1339.7711        | -12.86        | 0        | 78        | 7.5e-007        | 1        | R.DLKPENLLLASK.C                  |
| <a href="#">658</a>                                     | 447.5925        | 1339.7557        | 1339.7711        | -11.49        | 0        | (59)      | 6e-005          | 1        | R.DLKPENLLLASK.C                  |
| <a href="#">688</a>                                     | 468.5813        | 1402.7221        | 1402.7317        | -6.87         | 0        | (26)      | 0.16            | 1        | R.LTQYIDGQGRPR.T                  |
| <a href="#">689</a>                                     | 468.5816        | 1402.7230        | 1402.7317        | -6.23         | 0        | (40)      | 0.0067          | 1        | R.LTQYIDGQGRPR.T                  |
| <a href="#">690</a>                                     | 702.3738        | 1402.7330        | 1402.7317        | 0.96          | 0        | (37)      | 0.015           | 1        | R.LTQYIDGQGRPR.T                  |
| <a href="#">691</a>                                     | 702.3776        | 1402.7406        | 1402.7317        | 6.38          | 0        | 51        | 0.00048         | 1        | R.LTQYIDGQGRPR.T                  |
| <a href="#">707</a>                                     | 743.4136        | 1484.8126        | 1484.8021        | 7.13          | 0        | 75        | 1.7e-006        | 1        | K.NLINQMLTINPAK.R + Oxidation (M) |
| <input checked="" type="checkbox"/> <a href="#">782</a> | <b>802.8676</b> | <b>1603.7206</b> | <b>1603.7406</b> | <b>-12.44</b> | <b>0</b> | <b>90</b> | <b>3.8e-008</b> | <b>1</b> | <b>R.FTDDYQLFEELGK.G</b>          |
| <a href="#">794</a>                                     | 542.6372        | 1624.8898        | 1624.9082        | -11.37        | 1        | 89        | 5.7e-008        | 1        | K.NLINQMLTINPAK.R.I               |
| <a href="#">795</a>                                     | 813.4636        | 1624.9126        | 1624.9082        | 2.71          | 1        | (55)      | 9.8e-005        | 1        | K.NLINQMLTINPAK.R.I               |
| <a href="#">883</a>                                     | 1040.9640       | 2079.9134        | 2079.9426        | -13.99        | 0        | 78        | 5.2e-007        | 1        | K.AGAYDFPSPEDWTVTPEAK.N           |

Proteins matching the same set of peptides:

[IPI00228044](#) Mass: 59013 Score: 412 Queries matched: 18

Tax\_Id=10090 Gene\_Symbol=Camk2g Isoform 2 of Calcium/calmodulin-dependent protein kinase type II subunit gamma

[IPI00228045](#) Mass: 56610 Score: 412 Queries matched: 18

Tax\_Id=10090 Gene\_Symbol=Camk2g Isoform 3 of Calcium/calmodulin-dependent protein kinase type II subunit gamma

9. [IPI00117348](#) Mass: 50804 Score: 341 Queries matched: 12 emPAI: 0.46

Tax\_Id=10090 Gene\_Symbol=Tubalb Tubulin alpha-1B chain

 Check to include this hit in error tolerant search or archive report

| Query                                                   | Observed        | Mr(expt)         | Mr(calc)         | ppm          | Miss     | Score       | Expect          | Rank     | Peptide                   |
|---------------------------------------------------------|-----------------|------------------|------------------|--------------|----------|-------------|-----------------|----------|---------------------------|
| <input checked="" type="checkbox"/> <a href="#">708</a> | <b>744.4436</b> | <b>1486.8726</b> | <b>1486.8719</b> | <b>0.52</b>  | <b>0</b> | <b>90</b>   | <b>2.2e-008</b> | <b>1</b> | <b>R.LISQVSSITASLR.F</b>  |
| <input checked="" type="checkbox"/> <a href="#">822</a> | <b>851.4536</b> | <b>1700.8926</b> | <b>1700.8985</b> | <b>-3.45</b> | <b>0</b> | <b>64</b>   | <b>2.3e-005</b> | <b>1</b> | <b>R.AVFVLEPTVIDEVR.T</b> |
| <input checked="" type="checkbox"/> <a href="#">823</a> | <b>851.4573</b> | <b>1700.9000</b> | <b>1700.8985</b> | <b>0.90</b>  | <b>0</b> | <b>(60)</b> | <b>5.7e-005</b> | <b>1</b> | <b>R.AVFVLEPTVIDEVR.T</b> |

|                                     |                     |           |           |           |        |   |      |          |   |                            |
|-------------------------------------|---------------------|-----------|-----------|-----------|--------|---|------|----------|---|----------------------------|
| <input checked="" type="checkbox"/> | <a href="#">841</a> | 878.9860  | 1755.9574 | 1755.9559 | 0.86   | 0 | 67   | 8.3e-006 | 1 | R.IHFPPLATYAPVISAEK.A      |
| <input checked="" type="checkbox"/> | <a href="#">842</a> | 878.9954  | 1755.9762 | 1755.9559 | 11.6   | 0 | (66) | 9.9e-006 | 1 | R.IHFPPLATYAPVISAEK.A      |
| <input checked="" type="checkbox"/> | <a href="#">857</a> | 912.9819  | 1823.9492 | 1823.9782 | -15.85 | 0 | (26) | 0.13     | 1 | K.VGINYQPPTVVPGGDLAK.V     |
| <input checked="" type="checkbox"/> | <a href="#">858</a> | 913.0020  | 1823.9894 | 1823.9782 | 6.19   | 0 | 29   | 0.054    | 1 | K.VGINYQPPTVVPGGDLAK.V     |
| <input checked="" type="checkbox"/> | <a href="#">914</a> | 1205.1045 | 2408.1944 | 2408.2012 | -2.82  | 0 | 128  | 7.5e-012 | 1 | R.FDGNLVDLTFEQTNLVPYPR.I   |
| <input checked="" type="checkbox"/> | <a href="#">915</a> | 604.5469  | 2414.1585 | 2414.1978 | -16.29 | 1 | (39) | 0.0058   | 1 | R.QLFHPPEQLITGKEDAANNYAR.G |
| <input checked="" type="checkbox"/> | <a href="#">916</a> | 604.5476  | 2414.1613 | 2414.1978 | -15.13 | 1 | 54   | 0.0002   | 1 | R.QLFHPPEQLITGKEDAANNYAR.G |
| <input checked="" type="checkbox"/> | <a href="#">917</a> | 604.5506  | 2414.1733 | 2414.1978 | -10.16 | 1 | (24) | 0.19     | 1 | R.QLFHPPEQLITGKEDAANNYAR.G |
| <input checked="" type="checkbox"/> | <a href="#">918</a> | 604.5528  | 2414.1821 | 2414.1978 | -6.52  | 1 | (18) | 0.68     | 1 | R.QLFHPPEQLITGKEDAANNYAR.G |

## Proteins matching the same set of peptides:

[IPI00129028](#) Mass: 50689 Score: 341 Queries matched: 12  
Tax\_Id=10090 Gene\_Symbol=Gm5620 Uncharacterized protein  
[IPI00403810](#) Mass: 50562 Score: 341 Queries matched: 12  
Tax\_Id=10090 Gene\_Symbol=Tubalc Tubulin alpha-1C chain

10. [IPI00230145](#) Mass: 21224 Score: 297 Queries matched: 10 emPAI: 1.09  
Tax\_Id=10090 Gene\_Symbol=Fth1 Ferritin heavy chain

Check to include this hit in error tolerant search or archive report

| Query                               | Observed            | Mr(expt) | Mr(calc)  | ppm       | Miss   | Score | Expect | Rank     | Peptide |                              |
|-------------------------------------|---------------------|----------|-----------|-----------|--------|-------|--------|----------|---------|------------------------------|
| <input checked="" type="checkbox"/> | <a href="#">605</a> | 423.2317 | 1266.6733 | 1266.6932 | -15.71 | 0     | 58     | 9.9e-005 | 1       | K.SVNQSLLELHK.L              |
| <input checked="" type="checkbox"/> | <a href="#">606</a> | 634.3522 | 1266.6898 | 1266.6932 | -2.63  | 0     | (57)   | 0.0001   | 1       | K.SVNQSLLELHK.L              |
| <input checked="" type="checkbox"/> | <a href="#">607</a> | 634.3550 | 1266.6954 | 1266.6932 | 1.79   | 0     | (57)   | 9.5e-005 | 1       | K.SVNQSLLELHK.L              |
| <input checked="" type="checkbox"/> | <a href="#">718</a> | 765.3590 | 1528.7034 | 1528.7018 | 1.06   | 0     | (64)   | 1.9e-005 | 1       | R.QNYHQDAEAAINR.Q            |
| <input checked="" type="checkbox"/> | <a href="#">719</a> | 765.3598 | 1528.7050 | 1528.7018 | 2.11   | 0     | 72     | 3e-006   | 1       | R.QNYHQDAEAAINR.Q            |
| <input checked="" type="checkbox"/> | <a href="#">920</a> | 641.5282 | 2562.0837 | 2562.1155 | -12.42 | 1     | (41)   | 0.0013   | 1       | K.MGAPEAGMAEYLFDKHTLGHGDES.- |
| <input checked="" type="checkbox"/> | <a href="#">921</a> | 855.0369 | 2562.0889 | 2562.1155 | -10.40 | 1     | (26)   | 0.045    | 1       | K.MGAPEAGMAEYLFDKHTLGHGDES.- |
| <input checked="" type="checkbox"/> | <a href="#">922</a> | 641.5305 | 2562.0929 | 2562.1155 | -8.83  | 1     | (13)   | 0.83     | 1       | K.MGAPEAGMAEYLFDKHTLGHGDES.- |
| <input checked="" type="checkbox"/> | <a href="#">923</a> | 855.0422 | 2562.1048 | 2562.1155 | -4.19  | 1     | 111    | 1.6e-010 | 1       | K.MGAPEAGMAEYLFDKHTLGHGDES.- |
| <input checked="" type="checkbox"/> | <a href="#">924</a> | 855.0442 | 2562.1108 | 2562.1155 | -1.85  | 1     | (46)   | 0.00051  | 1       | K.MGAPEAGMAEYLFDKHTLGHGDES.- |

11. [IPI00112251](#) Mass: 50842 Score: 277 Queries matched: 14 emPAI: 0.76  
Tax\_Id=10090 Gene\_Symbol=Tubb3 Tubulin beta-3 chain

Check to include this hit in error tolerant search or archive report

| Query               | Observed | Mr(expt)  | Mr(calc)  | ppm    | Miss | Score | Expect   | Rank | Peptide                             |
|---------------------|----------|-----------|-----------|--------|------|-------|----------|------|-------------------------------------|
| <a href="#">557</a> | 580.3218 | 1158.6290 | 1158.6219 | 6.13   | 0    | 48    | 0.0012   | 1    | K.LAVNMVPPFR.L + Oxidation (M)      |
| <a href="#">643</a> | 660.3592 | 1318.7038 | 1318.6955 | 6.32   | 0    | 63    | 3.3e-005 | 1    | R.IMNTFSVVPSPK.V                    |
| <a href="#">653</a> | 668.3525 | 1334.6904 | 1334.6904 | 0.01   | 0    | (8)   | 12       | 1    | R.IMNTFSVVPSPK.V + Oxidation (M)    |
| <a href="#">654</a> | 668.3532 | 1334.6918 | 1334.6904 | 1.06   | 0    | (4)   | 28       | 4    | R.IMNTFSVVPSPK.V + Oxidation (M)    |
| <a href="#">783</a> | 808.4200 | 1614.8254 | 1614.8287 | -2.02  | 0    | (49)  | 0.00091  | 1    | R.AILVDLEPGTMDSVR.S                 |
| <a href="#">789</a> | 810.9224 | 1619.8302 | 1619.8283 | 1.23   | 0    | 18    | 0.99     | 2    | R.LHFFMPGFAPLTAR.G + Oxidation (M)  |
| <a href="#">790</a> | 810.9226 | 1619.8306 | 1619.8283 | 1.47   | 0    | (17)  | 1.3      | 2    | R.LHFFMPGFAPLTAR.G + Oxidation (M)  |
| <a href="#">797</a> | 816.4169 | 1630.8192 | 1630.8236 | -2.68  | 0    | 59    | 0.0001   | 1    | R.AILVDLEPGTMDSVR.S + Oxidation (M) |
| <a href="#">816</a> | 846.4307 | 1690.8468 | 1690.8600 | -7.78  | 0    | 43    | 0.0034   | 1    | R.ALTVPPELTQQMFDK.N                 |
| <a href="#">819</a> | 848.9158 | 1695.8170 | 1695.8257 | -5.07  | 0    | 64    | 2.6e-005 | 1    | K.NSSYFVEWIPNNVK.V                  |
| <a href="#">820</a> | 848.9227 | 1695.8308 | 1695.8257 | 3.06   | 0    | (47)  | 0.0013   | 1    | K.NSSYFVEWIPNNVK.V                  |
| <a href="#">833</a> | 854.4404 | 1706.8662 | 1706.8549 | 6.64   | 0    | (38)  | 0.0095   | 1    | R.ALTVPPELTQQMFDK.N + Oxidation (M) |
| <a href="#">877</a> | 653.6544 | 1957.9414 | 1957.9745 | -16.94 | 0    | (41)  | 0.0039   | 1    | K.GHYTEGAEVLDSVLDVVR.K              |
| <a href="#">878</a> | 980.0190 | 1958.0234 | 1957.9745 | 25.0   | 0    | 101   | 4.2e-009 | 1    | K.GHYTEGAEVLDSVLDVVR.K              |

12. [IPI00115546](#) Mass: 40524 Score: 212 Queries matched: 4 emPAI: 0.27  
Tax\_Id=10090 Gene\_Symbol=Gnaol Isoform Alpha-2 of Guanine nucleotide-binding protein G(o) subunit alpha

Check to include this hit in error tolerant search or archive report

| Query                               | Observed            | Mr(expt) | Mr(calc)  | ppm       | Miss | Score | Expect | Rank     | Peptide |                        |
|-------------------------------------|---------------------|----------|-----------|-----------|------|-------|--------|----------|---------|------------------------|
| <input checked="" type="checkbox"/> | <a href="#">509</a> | 529.3168 | 1056.6190 | 1056.6179 | 1.10 | 0     | 45     | 0.0021   | 1       | K.LLLLGAGESGK.S        |
| <input checked="" type="checkbox"/> | <a href="#">811</a> | 838.4183 | 1674.8220 | 1674.8213 | 0.44 | 0     | 98     | 1.1e-008 | 1       | R.IGAGDYQTEQDILR.T     |
| <input checked="" type="checkbox"/> | <a href="#">812</a> | 838.4184 | 1674.8222 | 1674.8213 | 0.56 | 0     | (59)   | 8.4e-005 | 1       | R.IGAGDYQTEQDILR.T     |
| <input checked="" type="checkbox"/> | <a href="#">876</a> | 979.4533 | 1956.8920 | 1956.8631 | 14.8 | 0     | 106    | 9.8e-010 | 1       | R.MEDTEPFSAEILLSAMMR.L |

## Proteins matching the same set of peptides:

[IPI00230192](#) Mass: 40629 Score: 212 Queries matched: 4  
Tax\_Id=10090 Gene\_Symbol=Gnaol Isoform Alpha-1 of Guanine nucleotide-binding protein G(o) subunit alpha

13. [IPI00138892](#) Mass: 15004 Score: 171 Queries matched: 3 emPAI: 0.51  
Tax\_Id=10090 Gene\_Symbol=Uba52 Ubiquitin-60S ribosomal protein L40

Check to include this hit in error tolerant search or archive report

| Query                               | Observed            | Mr(expt) | Mr(calc)  | ppm       | Miss  | Score | Expect | Rank     | Peptide |                       |
|-------------------------------------|---------------------|----------|-----------|-----------|-------|-------|--------|----------|---------|-----------------------|
| <input checked="" type="checkbox"/> | <a href="#">712</a> | 762.3933 | 1522.7720 | 1522.7740 | -1.25 | 1     | (66)   | 1.8e-005 | 1       | K.IQDKEGIPPPQQR.L     |
| <input checked="" type="checkbox"/> | <a href="#">713</a> | 762.4007 | 1522.7868 | 1522.7740 | 8.47  | 1     | 83     | 3.2e-007 | 1       | K.IQDKEGIPPPQQR.L     |
| <input checked="" type="checkbox"/> | <a href="#">881</a> | 663.0222 | 1986.0448 | 1986.0521 | -3.68 | 1     | 86     | 1.3e-007 | 1       | K.TITLEVEPSTIENVKAK.I |

## Proteins matching the same set of peptides:

[IPI00470152](#) Mass: 18282 Score: 171 Queries matched: 3  
Tax\_Id=10090 Gene\_Symbol=Rps27a Ubiquitin-40S ribosomal protein S27a  
[IPI00895319](#) Mass: 22277 Score: 171 Queries matched: 3  
Tax\_Id=10090 Gene\_Symbol=2810422J05Rik 22 kDa protein  
[IPI00895479](#) Mass: 27181 Score: 171 Queries matched: 3  
Tax\_Id=10090 Gene\_Symbol=2810422J05Rik 27 kDa protein

[IPI00918763](#) Mass: 11021 Score: 171 Queries matched: 3  
Tax\_Id=10090 Gene\_Symbol=Uba52 Ubiquitin subunit 1  
[IPI00750889](#) Mass: 22822 Score: 171 Queries matched: 3  
Tax\_Id=10090 Gene\_Symbol=Ubc Ubc protein  
[IPI00923013](#) Mass: 26603 Score: 171 Queries matched: 3  
Tax\_Id=10090 Gene\_Symbol=Ubb Ubiquitin B  
[IPI00923037](#) Mass: 22578 Score: 171 Queries matched: 3  
Tax\_Id=10090 Gene\_Symbol=Ubc Putative uncharacterized protein  
[IPI00139518](#) Mass: 34348 Score: 171 Queries matched: 3  
Tax\_Id=10090 Gene\_Symbol=Ubb Polyubiquitin-B  
[IPI00969323](#) Mass: 82603 Score: 171 Queries matched: 3  
Tax\_Id=10090 Gene\_Symbol=Ubc Polyubiquitin-C  
[IPI00755916](#) Mass: 82614 Score: 171 Queries matched: 3  
Tax\_Id=10090 Gene\_Symbol=Ubc ubiquitin

14. [IPI00122048](#) Mass: 113045 Score: 130 Queries matched: 4 emPAI: 0.09  
Tax\_Id=10090 Gene\_Symbol=Atpla3 Sodium/potassium-transporting ATPase subunit alpha-3  
 Check to include this hit in error tolerant search or archive report

| Query                                   | Observed | Mr(expt)  | Mr(calc)  | ppm   | Miss | Score | Expect   | Rank | Peptide                       |
|-----------------------------------------|----------|-----------|-----------|-------|------|-------|----------|------|-------------------------------|
| <input checked="" type="checkbox"/> 592 | 618.8615 | 1235.7084 | 1235.6986 | 7.96  | 0    | 40    | 0.0032   | 1    | R.LNIPVSVQVNR.D               |
| <input checked="" type="checkbox"/> 859 | 915.4680 | 1828.9214 | 1828.9167 | 2.62  | 0    | 109   | 7.1e-010 | 1    | K.GVGIISSEGNETVEDIAAR.L       |
| <input checked="" type="checkbox"/> 944 | 956.1194 | 2865.3364 | 2865.3490 | -4.42 | 1    | 42    | 0.0022   | 1    | K.EQPLDEEMKEAFQNAVYLELGLGER.V |
| <input checked="" type="checkbox"/> 945 | 956.1257 | 2865.3553 | 2865.3490 | 2.18  | 1    | (31)  | 0.03     | 1    | K.EQPLDEEMKEAFQNAVYLELGLGER.V |

Proteins matching the same set of peptides:

[IPI00752412](#) Mass: 117548 Score: 130 Queries matched: 4  
Tax\_Id=10090 Gene\_Symbol=Atpla3 ATPase, Na+/K+ transporting, alpha 3 polypeptide, isoform CRA\_c

15. [IPI00121038](#) Mass: 368613 Score: 123 Queries matched: 2 emPAI: 0.02  
Tax\_Id=10090 Gene\_Symbol=Vcan Isoform V0 of Versican core protein  
 Check to include this hit in error tolerant search or archive report

| Query                                   | Observed | Mr(expt)  | Mr(calc)  | ppm  | Miss | Score | Expect   | Rank | Peptide            |
|-----------------------------------------|----------|-----------|-----------|------|------|-------|----------|------|--------------------|
| <input checked="" type="checkbox"/> 639 | 657.8640 | 1313.7134 | 1313.7092 | 3.26 | 0    | 81    | 5e-007   | 1    | R.LATVGLQAQAWR.N   |
| <input checked="" type="checkbox"/> 694 | 709.3778 | 1416.7410 | 1416.7283 | 9.03 | 1    | 73    | 4.4e-006 | 1    | K.METSPPVKGSLSGK.V |

Proteins matching the same set of peptides:

[IPI00230441](#) Mass: 264594 Score: 123 Queries matched: 2  
Tax\_Id=10090 Gene\_Symbol=Vcan Isoform V1 of Versican core protein  
[IPI00469172](#) Mass: 76209 Score: 123 Queries matched: 2  
Tax\_Id=10090 Gene\_Symbol=Vcan versican core protein isoform 4  
[IPI00469565](#) Mass: 180325 Score: 123 Queries matched: 2  
Tax\_Id=10090 Gene\_Symbol=Vcan versican core protein isoform 3  
[IPI00473932](#) Mass: 41850 Score: 123 Queries matched: 2  
Tax\_Id=10090 Gene\_Symbol=Vcan versican core protein isoform 5  
[IPI00656277](#) Mass: 41758 Score: 123 Queries matched: 2  
Tax\_Id=10090 Gene\_Symbol=Vcan Versican  
[IPI00875672](#) Mass: 368720 Score: 123 Queries matched: 2  
Tax\_Id=10090 Gene\_Symbol=Vcan versican core protein isoform 1

16. [IPI00621468](#) Mass: 23411 Score: 114 Queries matched: 3 emPAI: 0.14  
Tax\_Id=10090 Gene\_Symbol=Gm7866 similar to ubiquitin A-52 residue ribosomal protein fusion product 1  
 Check to include this hit in error tolerant search or archive report

| Query                                   | Observed | Mr(expt)  | Mr(calc)  | ppm   | Miss | Score | Expect   | Rank | Peptide                               |
|-----------------------------------------|----------|-----------|-----------|-------|------|-------|----------|------|---------------------------------------|
| <a href="#">712</a>                     | 762.3933 | 1522.7720 | 1522.7740 | -1.25 | 1    | (66)  | 1.8e-005 | 1    | K.IQDKEGIPPDQQR.L                     |
| <a href="#">713</a>                     | 762.4007 | 1522.7868 | 1522.7740 | 8.47  | 1    | 83    | 3.2e-007 | 1    | K.IQDKEGIPPDQQR.L                     |
| <input checked="" type="checkbox"/> 836 | 582.9590 | 1745.8552 | 1745.8402 | 8.59  | 0    | 7     |          | 13   | K.QPTAALIMMTALMEK.I + 3 Oxidation (M) |

17. [IPI00110850](#) Mass: 42052 Score: 107 Queries matched: 6 emPAI: 0.16  
Tax\_Id=10090 Gene\_Symbol=Actb Actin, cytoplasmic 1  
 Check to include this hit in error tolerant search or archive report

| Query                                   | Observed  | Mr(expt)  | Mr(calc)  | ppm   | Miss | Score | Expect   | Rank | Peptide                           |
|-----------------------------------------|-----------|-----------|-----------|-------|------|-------|----------|------|-----------------------------------|
| <input checked="" type="checkbox"/> 576 | 599.8588  | 1197.7030 | 1197.6982 | 4.03  | 0    | 24    | 0.13     | 1    | R.AVFPISIVGRPR.H                  |
| <a href="#">791</a>                     | 812.4296  | 1622.8446 | 1622.8338 | 6.70  | 1    | 3     |          | 30   | R.LDLAQRDLTDYLMK.I                |
| <input checked="" type="checkbox"/> 849 | 895.9518  | 1789.8890 | 1789.8846 | 2.47  | 0    | 21    | 0.43     | 1    | K.SYELPDGQVITIGNER.F              |
| <a href="#">874</a>                     | 652.0251  | 1953.0535 | 1953.0571 | -1.86 | 0    | 5     |          | 12   | R.VAPEHPVLLTEAPLNPK.A             |
| <input checked="" type="checkbox"/> 897 | 1108.0496 | 2214.0846 | 2214.0627 | 9.92  | 0    | 71    | 3.8e-006 | 1    | K.DLYANTVLSGGTTYPIGIADR.M         |
| <input checked="" type="checkbox"/> 952 | 796.6569  | 3182.5985 | 3182.6071 | -2.69 | 0    | 67    | 5.2e-006 | 1    | R.TTGIVMDSGDGVTHVPIYEGYALPHAILR.L |

Proteins matching the same set of peptides:

[IPI00473320](#) Mass: 42115 Score: 107 Queries matched: 6  
Tax\_Id=10090 Gene\_Symbol=Actb Putative uncharacterized protein  
[IPI00652436](#) Mass: 42053 Score: 107 Queries matched: 6  
Tax\_Id=10090 Gene\_Symbol=Actg1 Putative uncharacterized protein  
[IPI00874482](#) Mass: 42108 Score: 107 Queries matched: 6  
Tax\_Id=10090 Gene\_Symbol=Actg1 Actin, cytoplasmic 2

18. [IPI00136929](#) Mass: 44029 Score: 107 Queries matched: 5 emPAI: 0.16  
Tax\_Id=10090 Gene\_Symbol=Actg1 Gamma actin-like protein  
 Check to include this hit in error tolerant search or archive report

| Query               | Observed  | Mr(expt)  | Mr(calc)  | ppm   | Miss | Score | Expect   | Rank | Peptide                          |
|---------------------|-----------|-----------|-----------|-------|------|-------|----------|------|----------------------------------|
| <a href="#">791</a> | 812.4296  | 1622.8446 | 1622.8338 | 6.70  | 1    | 3     | 30       | 3    | R.LDLAGRDLTDYLMK.I               |
| <a href="#">849</a> | 895.9518  | 1789.8890 | 1789.8846 | 2.47  | 0    | 21    | 0.43     | 1    | K.SYELPDGQVITIGNER.F             |
| <a href="#">874</a> | 652.0251  | 1953.0535 | 1953.0571 | -1.86 | 0    | 5     | 12       | 2    | R.VAPEEHPVLLTEAPLNPK.R           |
| <a href="#">897</a> | 1108.0496 | 2214.0846 | 2214.0627 | 9.92  | 0    | 71    | 3.8e-006 | 1    | K.DLYANTVLSGGTMYPLADR.M          |
| <a href="#">952</a> | 796.6569  | 3182.5985 | 3182.6071 | -2.69 | 0    | 67    | 5.2e-006 | 1    | R.TTGIVMDSGDGVTHTVPIEYALPHAILR.L |

19. [IPI00123176](#) Mass: 36804 Score: 99 Queries matched: 3 emPAI: 0.19  
Tax\_Id=10090 Gene\_Symbol=Gm6316 Glyceraldehyde-3-phosphate dehydrogenase

Check to include this hit in error tolerant search or archive report

| Query                                                   | Observed | Mr(expt)  | Mr(calc)  | ppm  | Miss | Score | Expect   | Rank | Peptide             |
|---------------------------------------------------------|----------|-----------|-----------|------|------|-------|----------|------|---------------------|
| <input checked="" type="checkbox"/> <a href="#">678</a> | 685.3767 | 1368.7388 | 1368.7361 | 2.01 | 0    | 51    | 0.00049  | 1    | R.GAAQNIIPASTGAAK.A |
| <input checked="" type="checkbox"/> <a href="#">679</a> | 685.3803 | 1368.7460 | 1368.7361 | 7.27 | 0    | (27)  | 0.1      | 1    | R.GAAQNIIPASTGAAK.A |
| <input checked="" type="checkbox"/> <a href="#">846</a> | 890.4040 | 1778.7934 | 1778.7900 | 1.95 | 0    | 85    | 1.4e-007 | 1    | K.LISWYDNEYGYSNR.M  |

**Proteins matching the same set of peptides:**

[IPI00135284](#) Mass: 36092 Score: 99 Queries matched: 3  
Tax\_Id=10090 Gene\_Symbol=Gm16374 Glyceraldehyde-3-phosphate dehydrogenase  
[IPI00271869](#) Mass: 36293 Score: 99 Queries matched: 3  
Tax\_Id=10090 Gene\_Symbol=- 36 kDa protein  
[IPI00273646](#) Mass: 36072 Score: 99 Queries matched: 3  
Tax\_Id=10090 Gene\_Symbol=Gapdh;LOC100042025 Glyceraldehyde-3-phosphate dehydrogenase  
[IPI00622795](#) Mass: 36074 Score: 99 Queries matched: 3  
Tax\_Id=10090 Gene\_Symbol=- 36 kDa protein  
[IPI00752289](#) Mass: 36308 Score: 99 Queries matched: 3  
Tax\_Id=10090 Gene\_Symbol=Gm10290 Glyceraldehyde-3-phosphate dehydrogenase  
[IPI00848801](#) Mass: 36100 Score: 99 Queries matched: 3  
Tax\_Id=10090 Gene\_Symbol=- 36 kDa protein  
[IPI00849045](#) Mass: 36072 Score: 99 Queries matched: 3  
Tax\_Id=10090 Gene\_Symbol=- 36 kDa protein  
[IPI00850337](#) Mass: 44633 Score: 99 Queries matched: 3  
Tax\_Id=10090 Gene\_Symbol=LOC100048117 similar to Glyceraldehyde-3-phosphate dehydrogenase (GAPDH) isoform 1  
[IPI00850377](#) Mass: 35975 Score: 99 Queries matched: 3  
Tax\_Id=10090 Gene\_Symbol=- 36 kDa protein  
[IPI00850779](#) Mass: 36076 Score: 99 Queries matched: 3  
Tax\_Id=10090 Gene\_Symbol=- 36 kDa protein  
[IPI00874682](#) Mass: 36038 Score: 99 Queries matched: 3  
Tax\_Id=10090 Gene\_Symbol=- 36 kDa protein  
[IPI00874964](#) Mass: 36512 Score: 99 Queries matched: 3  
Tax\_Id=10090 Gene\_Symbol=- 36 kDa protein

20. [IPI00114642](#) Mass: 13928 Score: 97 Queries matched: 1 emPAI: 0.25  
Tax\_Id=10090 Gene\_Symbol=Hist1h2bn;Hist1h2bl;Hist1h2bj;Hist1h2bf Histone H2B type 1-F/J/L

Check to include this hit in error tolerant search or archive report

| Query                                                   | Observed | Mr(expt)  | Mr(calc)  | ppm  | Miss | Score | Expect   | Rank | Peptide             |
|---------------------------------------------------------|----------|-----------|-----------|------|------|-------|----------|------|---------------------|
| <input checked="" type="checkbox"/> <a href="#">835</a> | 872.4168 | 1742.8190 | 1742.8120 | 4.05 | 0    | 97    | 1.2e-008 | 1    | K.AMGIMNSFVNDIFER.I |

**Proteins matching the same set of peptides:**

[IPI00124518](#) Mass: 13359 Score: 97 Queries matched: 1  
Tax\_Id=10090 Gene\_Symbol=Hist2h2bb Hist2h2bb protein  
[IPI00134534](#) Mass: 14879 Score: 97 Queries matched: 1  
Tax\_Id=10090 Gene\_Symbol=Gm11277;Gm13646 Histone H2B  
[IPI00187543](#) Mass: 13985 Score: 97 Queries matched: 1  
Tax\_Id=10090 Gene\_Symbol=Hist2h2be Histone H2B type 2-E  
[IPI00227930](#) Mass: 13912 Score: 97 Queries matched: 1  
Tax\_Id=10090 Gene\_Symbol=Hist1h2bh Histone H2B type 1-H  
[IPI00229539](#) Mass: 17248 Score: 97 Queries matched: 1  
Tax\_Id=10090 Gene\_Symbol=Hist3h2bb-ps histone H2B type 3-B  
[IPI00265768](#) Mass: 13912 Score: 97 Queries matched: 1  
Tax\_Id=10090 Gene\_Symbol=Hist1h2bk Histone H2B type 1-K  
[IPI00282266](#) Mass: 13898 Score: 97 Queries matched: 1  
Tax\_Id=10090 Gene\_Symbol=Hist1h2bg;Hist1h2be;Gm9998;Hist1h2bc Histone H2B type 1-C/E/G  
[IPI00282269](#) Mass: 13928 Score: 97 Queries matched: 1  
Tax\_Id=10090 Gene\_Symbol=Hist1h2bm Histone H2B type 1-M  
[IPI00348270](#) Mass: 13912 Score: 97 Queries matched: 1  
Tax\_Id=10090 Gene\_Symbol=Hist2h2bb Histone H2B type 2-B  
[IPI00453744](#) Mass: 15968 Score: 97 Queries matched: 1  
Tax\_Id=10090 Gene\_Symbol=Hist1h2bp 16 kDa protein  
[IPI00461514](#) Mass: 14987 Score: 97 Queries matched: 1  
Tax\_Id=10090 Gene\_Symbol=Gm13646 Histone H2B  
[IPI00553774](#) Mass: 13986 Score: 97 Queries matched: 1  
Tax\_Id=10090 Gene\_Symbol=Hist3h2ba Histone H2B type 3-A  
[IPI00554853](#) Mass: 13944 Score: 97 Queries matched: 1  
Tax\_Id=10090 Gene\_Symbol=Hist1h2bb Histone H2B type 1-B  
[IPI00648991](#) Mass: 13984 Score: 97 Queries matched: 1  
Tax\_Id=10090 Gene\_Symbol=Hist1h2bp Isoform 1 of Histone H2B type 1-P  
[IPI00761713](#) Mass: 15555 Score: 97 Queries matched: 1  
Tax\_Id=10090 Gene\_Symbol=Hist1h2bp Isoform 2 of Histone H2B type 1-P  
[IPI00874492](#) Mass: 14746 Score: 97 Queries matched: 1  
Tax\_Id=10090 Gene\_Symbol=Hist1h2bm 15 kDa protein  
[IPI00874654](#) Mass: 14787 Score: 97 Queries matched: 1  
Tax\_Id=10090 Gene\_Symbol=Hist1h2bg;Hist1h2be;Gm9998;Hist1h2bc Histone H2B



[IPI00874970](#) Mass: 14951 Score: 97 Queries matched: 1  
Tax\_Id=10090 Gene\_Symbol=Hist1h2bn;Hist1h2bl;Hist1h2bj;Hist1h2bf Histone H2B

[IPI00875277](#) Mass: 14242 Score: 97 Queries matched: 1  
Tax\_Id=10090 Gene\_Symbol=Hist1h2bk 14 kDa protein

[IPI00875523](#) Mass: 14900 Score: 97 Queries matched: 1  
Tax\_Id=10090 Gene\_Symbol=Hist1h2bh Histone H2B

[IPI00875901](#) Mass: 14806 Score: 97 Queries matched: 1  
Tax\_Id=10090 Gene\_Symbol=Hist1h2bk Histone H2B

[IPI00876167](#) Mass: 14126 Score: 97 Queries matched: 1  
Tax\_Id=10090 Gene\_Symbol=Hist1h2bn;Hist1h2bl;Hist1h2bj;Hist1h2bf 14 kDa protein

[IPI00876432](#) Mass: 14148 Score: 97 Queries matched: 1  
Tax\_Id=10090 Gene\_Symbol=Hist1h2bn;Hist1h2bl;Hist1h2bj;Hist1h2bf Histone H2B

[IPI00876549](#) Mass: 14902 Score: 97 Queries matched: 1  
Tax\_Id=10090 Gene\_Symbol=Hist1h2bn;Hist1h2bl;Hist1h2bj;Hist1h2bf Histone H2B

[IPI00876550](#) Mass: 14812 Score: 97 Queries matched: 1  
Tax\_Id=10090 Gene\_Symbol=- 15 kDa protein

21. [IPI00380227](#) Mass: 7720 Score: 76 Queries matched: 1 emPAI: 0.45  
Tax\_Id=10090 Gene\_Symbol=Nrgn Neurogranin

Check to include this hit in error tolerant search or archive report

| Query                                                   | Observed | Mr(expt)  | Mr(calc)  | ppm  | Miss | Score | Expect   | Rank | Peptide            |
|---------------------------------------------------------|----------|-----------|-----------|------|------|-------|----------|------|--------------------|
| <input checked="" type="checkbox"/> <a href="#">573</a> | 596.8132 | 1191.6118 | 1191.6109 | 0.81 | 1    | 76    | 2.1e-006 | 1    | R.KGPGGGGGGAGGAR.G |

22. [IPI00135106](#) Mass: 19584 Score: 71 Queries matched: 4 emPAI: 0.61  
Tax\_Id=10090 Gene\_Symbol=Mobp Isoform 1 of Myelin-associated oligodendrocyte basic protein

Check to include this hit in error tolerant search or archive report

| Query                                                   | Observed | Mr(expt)  | Mr(calc)  | ppm   | Miss | Score | Expect  | Rank | Peptide         |
|---------------------------------------------------------|----------|-----------|-----------|-------|------|-------|---------|------|-----------------|
| <a href="#">435</a>                                     | 449.7448 | 897.4750  | 897.4781  | -3.35 | 1    | 3     | 33      | 7    | R.GGSPTRAPR.F   |
| <input checked="" type="checkbox"/> <a href="#">477</a> | 498.7868 | 995.5590  | 995.5586  | 0.46  | 0    | 46    | 0.0011  | 1    | K.SPLMPAKPR.S   |
| <input checked="" type="checkbox"/> <a href="#">546</a> | 557.8030 | 1113.5914 | 1113.5891 | 2.14  | 1    | 38    | 0.012   | 1    | R.SSPLRGGTSR.G  |
| <input checked="" type="checkbox"/> <a href="#">559</a> | 580.8307 | 1159.6468 | 1159.6462 | 0.56  | 0    | 48    | 0.00095 | 1    | K.HQPAASPVVVR.A |

23. [IPI00221528](#) Mass: 42319 Score: 67 Queries matched: 4 emPAI: 0.08  
Tax\_Id=10090 Gene\_Symbol=Actb12 Beta-actin-like protein 2

Check to include this hit in error tolerant search or archive report

| Query                                                   | Observed | Mr(expt)  | Mr(calc)  | ppm   | Miss | Score | Expect   | Rank | Peptide                           |
|---------------------------------------------------------|----------|-----------|-----------|-------|------|-------|----------|------|-----------------------------------|
| <a href="#">791</a>                                     | 812.4296 | 1622.8446 | 1622.8338 | 6.70  | 1    | 3     | 30       | 3    | R.LDLAGRDLTDYLMK.I                |
| <a href="#">849</a>                                     | 895.9518 | 1789.8890 | 1789.8846 | 2.47  | 0    | 21    | 0.43     | 1    | R.SYELPDGQVITIGNER.F              |
| <input checked="" type="checkbox"/> <a href="#">874</a> | 652.0251 | 1953.0535 | 1953.0571 | -1.86 | 0    | 6     | 10       | 1    | R.VAPDEHPILLTEAPLNPK.I            |
| <a href="#">952</a>                                     | 796.6569 | 3182.5985 | 3182.6071 | -2.69 | 0    | 67    | 5.2e-006 | 1    | R.TTGIVMDSGDGVTHVPIYEGYALPHAILR.L |

24. [IPI00136703](#) Mass: 42971 Score: 58 Queries matched: 1 emPAI: 0.08  
Tax\_Id=10090 Gene\_Symbol=Ckb Creatine kinase B-type

Check to include this hit in error tolerant search or archive report

| Query                                                   | Observed | Mr(expt)  | Mr(calc)  | ppm  | Miss | Score | Expect   | Rank | Peptide             |
|---------------------------------------------------------|----------|-----------|-----------|------|------|-------|----------|------|---------------------|
| <input checked="" type="checkbox"/> <a href="#">807</a> | 828.9211 | 1655.8276 | 1655.8188 | 5.31 | 0    | 58    | 9.4e-005 | 1    | R.LEQQQAIDDLMPAQK.- |

25. [IPI00404590](#) Mass: 19412 Score: 53 Queries matched: 2 emPAI: 0.38  
Tax\_Id=10090 Gene\_Symbol=H1f0 Putative uncharacterized protein

Check to include this hit in error tolerant search or archive report

| Query                                                   | Observed | Mr(expt)  | Mr(calc)  | ppm   | Miss | Score | Expect | Rank | Peptide           |
|---------------------------------------------------------|----------|-----------|-----------|-------|------|-------|--------|------|-------------------|
| <input checked="" type="checkbox"/> <a href="#">514</a> | 530.7678 | 1059.5210 | 1059.5196 | 1.33  | 0    | 42    | 0.0063 | 1    | K.VGENADSQIK.L    |
| <input checked="" type="checkbox"/> <a href="#">624</a> | 651.3369 | 1300.6592 | 1300.6623 | -2.32 | 0    | 48    | 0.0013 | 1    | M.TENSTSAAPAKPK.R |

Proteins matching the same set of peptides:

[IPI00467914](#) Mass: 20848 Score: 53 Queries matched: 2  
Tax\_Id=10090 Gene\_Symbol=H1f0 Histone H1.0

26. [IPI00131366](#) Mass: 60627 Score: 50 Queries matched: 1 emPAI: 0.05  
Tax\_Id=10090 Gene\_Symbol=Krt6b Keratin, type II cytoskeletal 6B

Check to include this hit in error tolerant search or archive report

| Query                                                   | Observed | Mr(expt)  | Mr(calc)  | ppm    | Miss | Score | Expect  | Rank | Peptide          |
|---------------------------------------------------------|----------|-----------|-----------|--------|------|-------|---------|------|------------------|
| <input checked="" type="checkbox"/> <a href="#">627</a> | 651.8530 | 1301.6914 | 1301.7078 | -12.58 | 0    | 50    | 0.00072 | 1    | R.SLDLDSIIAEVK.A |

Proteins matching the same set of peptides:

[IPI00131368](#) Mass: 59641 Score: 50 Queries matched: 1  
Tax\_Id=10090 Gene\_Symbol=Krt6a Keratin, type II cytoskeletal 6A

[IPI00139301](#) Mass: 61957 Score: 50 Queries matched: 1  
Tax\_Id=10090 Gene\_Symbol=Krt5 Keratin, type II cytoskeletal 5

[IPI00221797](#) Mass: 59932 Score: 50 Queries matched: 1  
Tax\_Id=10090 Gene\_Symbol=Krt75 Keratin, type II cytoskeletal 75

[IPI00330480](#) Mass: 35315 Score: 50 Queries matched: 1  
Tax\_Id=10090 Gene\_Symbol=- 35 kDa protein

[IPI00470126](#) Mass: 60553 Score: 50 Queries matched: 1  
Tax\_Id=10090 Gene\_Symbol=Krt5 Uncharacterized protein

[IPI00762364](#) Mass: 50641 Score: 50 Queries matched: 1

Tax\_Id=10090 Gene\_Symbol=Krt6a Uncharacterized protein  
[IPI00785403](#) Mass: 59832 Score: 50 Queries matched: 1  
 Tax\_Id=10090 Gene\_Symbol=Krt6b keratin, type II cytoskeletal 6B

27. [IPI00348094](#) Mass: 51093 Score: 48 Queries matched: 2 emPAI: 0.06

Tax\_Id=10090 Gene\_Symbol=Tubbl Tubulin, beta 1

Check to include this hit in error tolerant search or archive report

| Query               | Observed | Mr(expt)  | Mr(calc)  | ppm  | Miss | Score | Expect | Rank | Peptide                        |
|---------------------|----------|-----------|-----------|------|------|-------|--------|------|--------------------------------|
| <a href="#">557</a> | 580.3218 | 1158.6290 | 1158.6219 | 6.13 | 0    | 48    | 0.0012 | 1    | K.LAVNMVFPFR.L + Oxidation (M) |
| <a href="#">643</a> | 660.3592 | 1318.7038 | 1318.6955 | 6.33 | 0    | 11    | 6      | 2    | R.IILNSFVMPSPK.V               |

28. [IPI00229525](#) Score: 45 Queries matched: 2

Tax\_Id=10090 Gene\_Symbol=Gnal Guanine nucleotide-binding protein G(olf) subunit alpha

Check to include this hit in error tolerant search or archive report

| Query               | Observed | Mr(expt)  | Mr(calc)  | ppm  | Miss | Score | Expect | Rank | Peptide                       |
|---------------------|----------|-----------|-----------|------|------|-------|--------|------|-------------------------------|
| <a href="#">509</a> | 529.3168 | 1056.6190 | 1056.6179 | 1.10 | 0    | 45    | 0.0021 | 1    | R.LLLLGGESGK.S                |
| <a href="#">571</a> | 595.8328 | 1189.6510 | 1189.6165 | 29.0 | 1    | 0     | 76     | 6    | R.MHLKQYELL.- + Oxidation (M) |

Proteins matching the same set of peptides:

[IPI00272681](#) Score: 45 Queries matched: 2

29. [IPI00118569](#) Mass: 44369 Score: 45 Queries matched: 1 emPAI: 0.07

Tax\_Id=10090 Gene\_Symbol=Gnal3 Guanine nucleotide-binding protein subunit alpha-13

Check to include this hit in error tolerant search or archive report

| Query               | Observed | Mr(expt)  | Mr(calc)  | ppm  | Miss | Score | Expect | Rank | Peptide        |
|---------------------|----------|-----------|-----------|------|------|-------|--------|------|----------------|
| <a href="#">509</a> | 529.3168 | 1056.6190 | 1056.6179 | 1.10 | 0    | 45    | 0.0021 | 1    | K.LLLLGGESGK.S |

Proteins matching the same set of peptides:

[IPI00230191](#) Mass: 44238 Score: 45 Queries matched: 1

Tax\_Id=10090 Gene\_Symbol=Gnal2 Guanine nucleotide-binding protein subunit alpha-12

[IPI00649388](#) Mass: 20095 Score: 45 Queries matched: 1

Tax\_Id=10090 Gene\_Symbol=Gnal3 Putative uncharacterized protein

30. [IPI00119067](#) Mass: 23731 Score: 44 Queries matched: 1 emPAI: 0.14

Tax\_Id=10090 Gene\_Symbol=Tppp Tubulin polymerization-promoting protein

Check to include this hit in error tolerant search or archive report

| Query                                                   | Observed | Mr(expt)  | Mr(calc)  | ppm  | Miss | Score | Expect | Rank | Peptide             |
|---------------------------------------------------------|----------|-----------|-----------|------|------|-------|--------|------|---------------------|
| <input checked="" type="checkbox"/> <a href="#">871</a> | 948.9888 | 1895.9630 | 1895.9516 | 6.02 | 0    | 44    | 0.0026 | 1    | R.TITFEQFQALEELAK.K |

Peptide matches not assigned to protein hits: (no details means no match)

| Query                                                   | Observed  | Mr(expt)  | Mr(calc)  | ppm    | Miss | Score | Expect | Rank | Peptide                            |
|---------------------------------------------------------|-----------|-----------|-----------|--------|------|-------|--------|------|------------------------------------|
| <input checked="" type="checkbox"/> <a href="#">684</a> | 696.3746  | 1390.7346 | 1390.7245 | 7.29   | 0    | 28    | 0.094  | 1    | LEGVVFYQPSR                        |
| <input checked="" type="checkbox"/> <a href="#">792</a> | 812.4532  | 1622.8918 | 1622.8992 | -4.50  | 0    | 28    | 0.068  | 1    | LAGTQPLEVLEAVQR                    |
| <input checked="" type="checkbox"/> <a href="#">685</a> | 697.3685  | 1392.7224 | 1392.7038 | 13.4   | 0    | 25    | 0.22   | 1    | ELGGVFYVGPAPR                      |
| <input checked="" type="checkbox"/> <a href="#">960</a> | 1259.2880 | 3774.8422 | 3774.8417 | 0.12   | 0    | 23    | 0.092  | 1    | ADTPIEEFTPTAFPALQYLESVDEGGVAWQAGLR |
| <input checked="" type="checkbox"/> <a href="#">595</a> | 622.7920  | 1243.5694 | 1243.5581 | 9.10   | 1    | 22    | 0.34   | 1    | ESQAYYDGRR                         |
| <input checked="" type="checkbox"/> <a href="#">663</a> | 673.8612  | 1345.7078 | 1345.6925 | 11.4   | 1    | 22    | 0.54   | 1    | AGGQGFKMALNPR                      |
| <input checked="" type="checkbox"/> <a href="#">404</a> | 421.7574  | 841.5002  | 841.4810  | 22.9   | 0    | 21    | 0.48   | 1    | AVLTWPR                            |
| <input checked="" type="checkbox"/> <a href="#">515</a> | 530.7717  | 1059.5288 | 1059.5713 | -40.04 | 0    | 17    | 2      | 1    | AGSLAFPELR                         |
| <input checked="" type="checkbox"/> <a href="#">304</a> | 346.2065  | 690.3984  | 690.3912  | 10.5   | 1    | 17    | 1.4    | 1    | KDVTTK                             |
| <input checked="" type="checkbox"/> <a href="#">565</a> | 587.8109  | 1173.6072 | 1173.6353 | -23.93 | 0    | 17    | 2      | 1    | NATITQALTNK                        |
| <input checked="" type="checkbox"/> <a href="#">488</a> | 508.7708  | 1015.5270 | 1015.5298 | -2.76  | 0    | 16    | 2.6    | 1    | QHTVTTTK                           |
| <input checked="" type="checkbox"/> <a href="#">551</a> | 566.2957  | 1130.5768 | 1130.5720 | 4.27   | 0    | 16    | 2.2    | 1    | TTHYGLPQK                          |
| <input checked="" type="checkbox"/> <a href="#">496</a> | 346.2080  | 1035.6022 | 1035.5964 | 5.55   | 0    | 16    | 0.9    | 1    | KPIPLEDPK                          |
| <input checked="" type="checkbox"/> <a href="#">508</a> | 529.2868  | 1056.5590 | 1056.5716 | -11.89 | 1    | 15    | 2.4    | 1    | KPDWDLKR                           |
| <input checked="" type="checkbox"/> <a href="#">394</a> | 411.2468  | 820.4790  | 820.4668  | 15.0   | 1    | 15    | 1.5    | 1    | RQPAPPR                            |
| <input checked="" type="checkbox"/> <a href="#">709</a> | 746.3885  | 1490.7624 | 1490.7841 | -14.54 | 0    | 14    | 2.9    | 1    | VIEDGPEPRPNLR                      |
| <input checked="" type="checkbox"/> <a href="#">604</a> | 633.3046  | 1264.5946 | 1264.6425 | -37.83 | 1    | 14    | 2.7    | 1    | FQQEAPHPRR                         |
| <input checked="" type="checkbox"/> <a href="#">424</a> | 446.2583  | 890.5020  | 890.5226  | -23.04 | 1    | 14    | 3.3    | 1    | GVQFVIKT                           |
| <input checked="" type="checkbox"/> <a href="#">475</a> | 329.1741  | 984.5005  | 984.4923  | 8.26   | 1    | 14    | 2.8    | 1    | CVHKQTGR                           |
| <input checked="" type="checkbox"/> <a href="#">436</a> | 449.7468  | 897.4790  | 897.4920  | -14.39 | 0    | 14    | 3      | 1    | KPEGKPKD                           |
| <input checked="" type="checkbox"/> <a href="#">470</a> | 487.3048  | 972.5950  | 972.5869  | 8.38   | 0    | 13    | 1.5    | 1    | VPGHLPVVR                          |
| <input checked="" type="checkbox"/> <a href="#">418</a> | 441.2692  | 880.5238  | 880.5355  | -13.24 | 0    | 13    | 1.1    | 1    | RPTVPR                             |
| <input checked="" type="checkbox"/> <a href="#">539</a> | 551.8070  | 1101.5994 | 1101.5455 | 49.0   | 1    | 13    | 4      | 1    | KDSGYITLR                          |
| <input checked="" type="checkbox"/> <a href="#">507</a> | 529.2727  | 1056.5308 | 1056.5676 | -34.77 | 1    | 13    | 3.6    | 1    | QLGDLERAR                          |
| <input checked="" type="checkbox"/> <a href="#">634</a> | 653.3388  | 1304.6630 | 1304.6143 | 37.4   | 1    | 13    | 4.3    | 1    | LGADMEDLRNR + Oxidation (M)        |
| <input checked="" type="checkbox"/> <a href="#">641</a> | 659.8417  | 1317.6688 | 1317.7115 | -32.35 | 0    | 12    | 4.4    | 1    | LLYMAIDGVAPR                       |
| <input checked="" type="checkbox"/> <a href="#">723</a> | 776.3270  | 1550.6394 | 1550.6759 | -23.48 | 1    | 12    | 0.97   | 1    | GYDLAFRCSCR                        |
| <input checked="" type="checkbox"/> <a href="#">358</a> | 780.3290  | 779.3217  | 779.3054  | 20.9   | 0    | 12    | 2      | 1    | ANECMR                             |
| <input checked="" type="checkbox"/> <a href="#">615</a> | 643.8413  | 1285.6680 | 1285.7064 | -29.81 | 1    | 12    | 5      | 1    | TIMKDEIAIPR                        |
| <input checked="" type="checkbox"/> <a href="#">478</a> | 499.2877  | 996.5608  | 996.5141  | 46.9   | 0    | 12    | 3      | 1    | VPWGAQPR                           |
| <input checked="" type="checkbox"/> <a href="#">324</a> | 743.4591  | 742.4518  | 742.4198  | 43.1   | 1    | 12    | 5.5    | 1    | RGAAVGGP                           |
| <input checked="" type="checkbox"/> <a href="#">582</a> | 606.7893  | 1211.5640 | 1211.6007 | -30.23 | 1    | 11    | 4.1    | 1    | DSLAEATRGRH                        |
| <input checked="" type="checkbox"/> <a href="#">455</a> | 470.7701  | 939.5256  | 939.5548  | -31.07 | 1    | 11    | 3.5    | 1    | MRKPRPR                            |
| <input checked="" type="checkbox"/> <a href="#">519</a> | 531.2891  | 1060.5636 | 1060.5665 | -2.70  | 0    | 11    | 6.6    | 1    | YLLASNAPGR                         |
| <input checked="" type="checkbox"/> <a href="#">491</a> | 517.2959  | 1032.5772 | 1032.6001 | -22.17 | 1    | 11    | 5.1    | 1    | KVIAAMTVGK + Oxidation (M)         |
| <input checked="" type="checkbox"/> <a href="#">569</a> | 595.8130  | 1189.6114 | 1189.6489 | -31.45 | 1    | 11    | 8      | 1    | KTNIIDSMRLR                        |

|     |           |           |           |        |   |    |     |   |                                           |
|-----|-----------|-----------|-----------|--------|---|----|-----|---|-------------------------------------------|
| 683 | 458.9068  | 1373.6986 | 1373.7085 | -7.24  | 1 | 10 | 7.5 | 1 | VTAAAMAGNKSTPR                            |
| 710 | 756.8234  | 1511.6322 | 1511.6939 | -40.80 | 1 | 10 | 2.3 | 1 | YYGTMHERVNR                               |
| 687 | 699.8989  | 1397.7832 | 1397.7263 | 40.8   | 1 | 10 | 4.7 | 1 | ELKTDNLPNQAR                              |
| 614 | 643.3510  | 1284.6874 | 1284.7150 | -21.41 | 1 | 10 | 6.8 | 1 | QKNSINIQAQAK                              |
| 480 | 500.2594  | 998.5042  | 998.5509  | -46.69 | 0 | 10 | 6.7 | 1 | VQIQQAANK                                 |
| 435 | 449.7448  | 897.4750  | 897.4556  | 21.7   | 0 | 10 | 7.2 | 1 | DAETPLPR                                  |
| 809 | 834.9677  | 1667.9208 | 1667.8970 | 14.3   | 1 | 10 | 4.4 | 1 | QPPFPPTHMGPIKLR                           |
| 301 | 685.3705  | 684.3632  | 684.3667  | -5.08  | 0 | 10 | 4.9 | 1 | GAERPR                                    |
| 840 | 878.4757  | 1754.9368 | 1754.9567 | -11.28 | 1 | 10 | 4.7 | 1 | ELLDLVASHFNLKEK                           |
| 594 | 622.7913  | 1243.5680 | 1243.5681 | -0.00  | 1 | 10 | 5.4 | 1 | KQGGSPDEPDSK                              |
| 443 | 455.2521  | 908.4896  | 908.4790  | 11.8   | 0 | 10 | 6.8 | 1 | ELVMFVR + Oxidation (M)                   |
| 506 | 528.7111  | 1055.4076 | 1055.4310 | -22.17 | 1 | 10 | 1   | 1 | MGNMCSRK + Oxidation (M)                  |
| 517 | 530.8016  | 1059.5886 | 1059.5672 | 20.2   | 1 | 10 | 8.9 | 1 | SERDTLLAR                                 |
| 400 | 417.2493  | 832.4840  | 832.4443  | 47.7   | 0 | 9  | 5.6 | 1 | SLPVDFR                                   |
| 518 | 530.8044  | 1059.5942 | 1059.5672 | 25.5   | 1 | 9  | 8.5 | 1 | SERDTLLAR                                 |
| 635 | 653.8335  | 1305.6524 | 1305.6751 | -17.32 | 1 | 9  | 8.3 | 1 | YEALKEPMVAR                               |
| 479 | 499.7479  | 997.4812  | 997.4507  | 30.6   | 1 | 9  | 6.6 | 1 | MAMAMRQK + 2 Oxidation (M)                |
| 273 | 320.1377  | 638.2608  | 638.2880  | -42.53 | 0 | 9  | 2.7 | 1 | SMVMR + Oxidation (M)                     |
| 501 | 523.2865  | 1044.5584 | 1044.5101 | 46.3   | 1 | 9  | 12  | 1 | KGAAGWEGGGR                               |
| 584 | 607.3194  | 1212.6242 | 1212.6211 | 2.61   | 1 | 9  | 9.2 | 1 | LSASPSPADRGR                              |
| 668 | 678.3817  | 1354.7488 | 1354.7820 | -24.48 | 0 | 9  | 6.7 | 1 | IVQLLAGVADQTK                             |
| 680 | 458.5831  | 1372.7275 | 1372.7184 | 6.58   | 1 | 9  | 9.5 | 1 | QAQHRRRPNR                                |
| 522 | 532.2796  | 1062.5446 | 1062.4917 | 49.9   | 0 | 9  | 13  | 1 | AGEMAQWVR + Oxidation (M)                 |
| 516 | 530.8014  | 1059.5882 | 1059.5672 | 19.8   | 1 | 8  | 11  | 1 | SERDTLLAR                                 |
| 180 | 487.3051  | 486.2978  | 486.2914  | 13.2   | 0 | 8  | 19  | 1 | AGAIR                                     |
| 498 | 520.2791  | 1038.5436 | 1038.5458 | -2.05  | 0 | 8  | 9.6 | 1 | AQASAPAQAPK                               |
| 810 | 838.3979  | 1674.7812 | 1674.8246 | -25.91 | 1 | 8  | 8.7 | 1 | ALDGLQREAMEELGK + Oxidation (M)           |
| 201 | 518.2473  | 517.2400  | 517.2609  | -40.29 | 0 | 8  | 9.8 | 1 | AGGTGR                                    |
| 654 | 668.3532  | 1334.6918 | 1334.7050 | -9.86  | 1 | 8  | 12  | 1 | DKPLISRTMMK + Oxidation (M)               |
| 854 | 903.4784  | 1804.9422 | 1805.0121 | -38.69 | 0 | 8  | 9.1 | 1 | MAGLVFLGLLSSGATVAK                        |
| 538 | 548.2862  | 1094.5578 | 1094.5253 | 29.8   | 0 | 8  | 11  | 1 | LWVMDMIR + 2 Oxidation (M)                |
| 608 | 639.2949  | 1276.5752 | 1276.6380 | -49.15 | 1 | 8  | 8   | 1 | GIRTCLICER                                |
| 426 | 446.2641  | 890.5136  | 890.5226  | -10.02 | 1 | 8  | 10  | 1 | GVQFVIKT                                  |
| 454 | 467.7639  | 933.5132  | 933.4702  | 46.1   | 0 | 7  | 13  | 1 | LSNNMLAR + Oxidation (M)                  |
| 406 | 423.2285  | 844.4424  | 844.4767  | -40.51 | 0 | 7  | 22  | 1 | IGTSLAQR                                  |
| 256 | 607.3195  | 606.3122  | 606.3047  | 12.4   | 0 | 7  | 15  | 1 | MDVVK + Oxidation (M)                     |
| 504 | 525.7818  | 1049.5490 | 1049.5943 | -43.14 | 0 | 7  | 15  | 1 | VLPFAVLNMK + Oxidation (M)                |
| 682 | 687.8503  | 1373.6860 | 1373.6939 | -5.73  | 0 | 7  | 15  | 1 | EVYAHAGTTLQGK                             |
| 537 | 545.2896  | 1088.5646 | 1088.5978 | -30.49 | 1 | 7  | 17  | 1 | KDFTVNLPR                                 |
| 442 | 452.7382  | 903.4618  | 903.4522  | 10.7   | 1 | 7  | 20  | 1 | GAATADSRR                                 |
| 306 | 350.1603  | 698.3060  | 698.3096  | -5.09  | 0 | 7  | 4.1 | 1 | SAHGDR                                    |
| 560 | 581.3129  | 1160.6112 | 1160.5859 | 21.8   | 0 | 7  | 19  | 1 | QMPSTIAIER + Oxidation (M)                |
| 460 | 475.7495  | 949.4844  | 949.4406  | 46.2   | 0 | 7  | 18  | 1 | QEQWFR                                    |
| 567 | 595.3054  | 1188.5962 | 1188.6033 | -5.95  | 1 | 7  | 18  | 1 | QMQRSLSPR + Oxidation (M)                 |
| 503 | 525.2869  | 1048.5592 | 1048.5084 | 48.5   | 1 | 7  | 17  | 1 | MAGLARGDSR + Oxidation (M)                |
| 303 | 343.7281  | 685.4416  | 685.4235  | 26.5   | 1 | 7  | 12  | 1 | GAKALAR                                   |
| 597 | 623.3267  | 1244.6388 | 1244.5819 | 45.7   | 0 | 7  | 19  | 1 | QDMPKPSEAR + Oxidation (M)                |
| 873 | 956.4583  | 1910.9020 | 1910.9964 | -49.39 | 1 | 6  | 11  | 1 | LFEDMGLFEAFKIPVR                          |
| 572 | 596.3065  | 1190.5984 | 1190.5649 | 28.2   | 1 | 6  | 19  | 1 | RCSMTGQVPR                                |
| 664 | 675.3417  | 1348.6688 | 1348.6735 | -3.47  | 0 | 6  | 20  | 1 | GADAASPPPVAGSPR                           |
| 461 | 476.2360  | 950.4574  | 950.4682  | -11.33 | 0 | 6  | 18  | 1 | QAPGAHGASR                                |
| 743 | 785.8390  | 1569.6634 | 1569.6664 | -1.90  | 1 | 6  | 5.9 | 1 | WTEGTCCKGSTQCR                            |
| 593 | 622.7913  | 1243.5680 | 1243.5581 | 7.97   | 1 | 6  | 13  | 1 | ESQAYYDGRR                                |
| 293 | 675.3319  | 674.3246  | 674.3347  | -14.99 | 0 | 6  | 25  | 1 | SSAASPR                                   |
| 927 | 881.7323  | 2642.1751 | 2642.2348 | -22.59 | 1 | 6  | 7.6 | 1 | ENSHPHHHHQPPPPQPGPSGERR                   |
| 453 | 463.2427  | 924.4708  | 924.4310  | 43.1   | 0 | 6  | 17  | 1 | FLCACVR                                   |
| 667 | 677.8867  | 1353.7588 | 1353.7001 | 43.4   | 1 | 6  | 11  | 1 | TESGGALRDLAHLK                            |
| 213 | 531.2889  | 530.2816  | 530.2635  | 34.2   | 0 | 6  | 44  | 1 | MAGPR                                     |
| 640 | 659.3407  | 1316.6668 | 1316.6725 | -4.26  | 1 | 6  | 24  | 1 | LVKEAFQDDPR                               |
| 666 | 676.3508  | 1350.6870 | 1350.6271 | 44.4   | 1 | 5  | 22  | 1 | EAMSKALDPAMR + 2 Oxidation (M)            |
| 600 | 630.3074  | 1258.6002 | 1258.6153 | -11.97 | 1 | 5  | 19  | 1 | KEVVEEAENGR                               |
| 329 | 379.7334  | 757.4522  | 757.4698  | -23.12 | 1 | 5  | 32  | 1 | KELLQK                                    |
| 558 | 580.8033  | 1159.5920 | 1159.6131 | -18.19 | 1 | 5  | 27  | 1 | MQLAELQRR + Oxidation (M)                 |
| 619 | 645.8328  | 1289.6510 | 1289.7013 | -38.97 | 1 | 5  | 24  | 1 | AEGTVMKLAQK + Oxidation (M)               |
| 652 | 667.3491  | 1332.6836 | 1332.6972 | -10.20 | 0 | 5  | 24  | 1 | LGGLPGPGPMANPR                            |
| 302 | 343.2315  | 684.4484  | 684.4646  | -23.64 | 1 | 5  | 14  | 1 | KAVVIR                                    |
| 677 | 684.3544  | 1366.6942 | 1366.6551 | 28.6   | 0 | 5  | 22  | 1 | EGMVTFSNTLPR + Oxidation (M)              |
| 555 | 577.2852  | 1152.5558 | 1152.5564 | -0.45  | 0 | 5  | 22  | 1 | EAFGFEQAVR                                |
| 850 | 897.9155  | 1793.8164 | 1793.8941 | -43.31 | 1 | 5  | 17  | 1 | TERSNTLNTAIVNMSK + Oxidation (M)          |
| 441 | 452.2508  | 902.4870  | 902.4709  | 17.9   | 1 | 5  | 36  | 1 | KSDPELSK                                  |
| 476 | 496.2224  | 990.4302  | 990.4744  | -44.54 | 0 | 5  | 12  | 1 | LGGNHSNHR                                 |
| 571 | 595.8328  | 1189.6510 | 1189.6819 | -25.93 | 1 | 5  | 27  | 1 | KLFPQDLATR                                |
| 669 | 678.8935  | 1355.7724 | 1355.7846 | -8.98  | 1 | 5  | 16  | 1 | QDPKLLMLLAAK + Oxidation (M)              |
| 626 | 651.8315  | 1301.6484 | 1301.6463 | 1.66   | 0 | 4  | 28  | 1 | KPTAQEDSADLK                              |
| 934 | 916.4277  | 2746.2613 | 2746.2996 | -13.94 | 1 | 4  | 12  | 1 | QAPPQYTFIGELNSMGIWYRMGR + 2 Oxidation (M) |
| 556 | 577.2904  | 1152.5662 | 1152.6147 | -42.08 | 1 | 4  | 26  | 1 | LTGRLMFMGK                                |
| 636 | 655.3013  | 1308.5880 | 1308.5252 | 48.0   | 0 | 4  | 17  | 1 | DINDQDESSR                                |
| 520 | 531.8290  | 1061.6434 | 1061.6386 | 4.60   | 1 | 4  | 7.9 | 1 | SFLILWKR                                  |
| 898 | 1110.6010 | 2219.1874 | 2219.1950 | -3.39  | 1 | 4  | 15  | 1 | QLFLEPSQKLEGGPPALPEAR                     |
| 487 | 505.7451  | 1009.4756 | 1009.4829 | -7.15  | 0 | 4  | 24  | 1 | EATPGEPGPR                                |
| 570 | 595.8189  | 1189.6232 | 1189.6012 | 18.5   | 1 | 4  | 40  | 1 | KQDIEAVMEK                                |

|     |           |           |           |        |   |   |     |   |                                             |
|-----|-----------|-----------|-----------|--------|---|---|-----|---|---------------------------------------------|
| 642 | 660.3415  | 1318.6684 | 1318.6526 | 12.0   | 0 | 4 | 32  | 1 | LTGAIMHFGNMK                                |
| 578 | 604.7988  | 1207.5830 | 1207.5615 | 17.8   | 1 | 4 | 33  | 1 | KGETSAAANMQR + Oxidation (M)                |
| 817 | 847.9592  | 1693.9038 | 1693.8423 | 36.3   | 0 | 4 | 23  | 1 | LRPIYDYLDNGNMK                              |
| 711 | 756.8477  | 1511.6808 | 1511.6939 | -8.65  | 1 | 4 | 21  | 1 | YGTSMHERVNR                                 |
| 425 | 446.2607  | 890.5068  | 890.4875  | 21.7   | 1 | 3 | 33  | 1 | FQRWVR                                      |
| 791 | 812.4296  | 1622.8446 | 1622.9144 | -42.98 | 0 | 3 | 27  | 1 | FSAEILQHIPLSLR                              |
| 568 | 595.8109  | 1189.6072 | 1189.6489 | -34.98 | 1 | 3 | 46  | 1 | KTNIIDSMRLR                                 |
| 305 | 697.3679  | 696.3606  | 696.3919  | -44.86 | 0 | 3 | 22  | 1 | LPSQQR                                      |
| 784 | 809.3986  | 1616.7826 | 1616.8279 | -27.99 | 1 | 3 | 32  | 1 | KMGNKPHMIQVYR + Oxidation (M)               |
| 382 | 810.4398  | 809.4325  | 809.3953  | 46.0   | 0 | 3 | 24  | 1 | MSLTNTK + Oxidation (M)                     |
| 271 | 631.3865  | 630.3792  | 630.3813  | -3.27  | 1 | 3 | 61  | 1 | KQISR                                       |
| 274 | 320.1440  | 638.2734  | 638.3024  | -45.33 | 0 | 3 | 15  | 1 | HLDPAS                                      |
| 947 | 961.7438  | 2882.2096 | 2882.3141 | -36.26 | 0 | 3 | 5.7 | 1 | DPGSPQLNQEAMADGVEGTPWSAEKPR + Oxidation (M) |
| 879 | 980.4991  | 1958.9836 | 1958.9810 | 1.36   | 0 | 3 | 32  | 1 | SNNGTDVNAQIPQLLYR                           |
| 486 | 504.2251  | 1006.4356 | 1006.4693 | -33.42 | 0 | 3 | 18  | 1 | QSHSQQHR                                    |
| 270 | 631.3174  | 630.3101  | 630.3198  | -15.29 | 1 | 3 | 43  | 1 | QDGRR                                       |
| 536 | 545.2885  | 1088.5624 | 1088.6012 | -35.59 | 1 | 3 | 51  | 1 | KALTGSMPIR + Oxidation (M)                  |
| 620 | 647.3015  | 1292.5884 | 1292.6183 | -23.12 | 0 | 3 | 30  | 1 | WTVVTFMSSNR + Oxidation (M)                 |
| 292 | 672.3444  | 671.3371  | 671.3602  | -34.42 | 0 | 2 | 24  | 1 | LGETPR                                      |
| 773 | 785.8511  | 1569.6876 | 1569.7068 | -12.20 | 1 | 2 | 20  | 1 | KFPEWMSMQSQR + Oxidation (M)                |
| 777 | 795.4383  | 1588.8620 | 1588.9044 | -26.68 | 1 | 2 | 31  | 1 | LLKAGVISALACMVK + Oxidation (M)             |
| 577 | 600.2880  | 1198.5614 | 1198.5441 | 14.5   | 0 | 2 | 35  | 1 | MGFPEAASSFR                                 |
| 943 | 1414.1135 | 2826.2124 | 2826.2840 | -25.32 | 0 | 2 | 12  | 1 | EYTESMCLENELEAQLGEPHLR + Oxidation (M)      |
| 381 | 809.4304  | 808.4231  | 808.4443  | -26.18 | 1 | 1 | 46  | 1 | AVGKYSQK                                    |
| 629 | 652.2864  | 1302.5582 | 1302.6099 | -39.65 | 1 | 1 | 20  | 1 | RCADVPGASGTGR                               |
| 245 | 600.3077  | 599.3004  | 599.3027  | -3.83  | 0 | 1 | 21  | 1 | DNPVR                                       |
| 250 | 601.3277  | 600.3204  | 600.3231  | -4.49  | 0 | 1 | 36  | 1 | ETVPR                                       |
| 545 | 556.8411  | 1111.6676 | 1111.6462 | 19.3   | 1 | 1 | 21  | 1 | KPQLDTRVR                                   |
| 942 | 1400.1620 | 2798.3094 | 2798.3075 | 0.68   | 1 | 1 | 27  | 1 | LGTNMYASRPFVETHMSATSNAASR + 2 Oxidation (M) |
| 903 | 762.0558  | 2283.1456 | 2283.0334 | 49.1   | 1 | 1 | 36  | 1 | KCSCVICSPTYVPELEAR                          |
| 421 | 445.2847  | 888.5548  | 888.5280  | 30.2   | 1 | 1 | 16  | 1 | KDSSLIVK                                    |
| 887 | 1048.9823 | 2095.9500 | 2095.9469 | 1.52   | 0 | 1 | 33  | 1 | SNPFHYPSNSVFFPFYF                           |
| 715 | 510.2402  | 1527.6988 | 1527.6922 | 4.29   | 1 | 1 | 42  | 1 | CNDPVMNEKLHR + Oxidation (M)                |
| 896 | 738.0253  | 2211.0541 | 2211.0477 | 2.86   | 0 | 0 | 45  | 1 | GPELMAIEGLENGEGFTTAGPR + Oxidation (M)      |
| 941 | 933.7730  | 2798.2972 | 2798.3075 | -3.71  | 1 | 0 | 32  | 1 | LGTNMYASRPFVETHMSATSNAASR + 2 Oxidation (M) |
| 1   | 300.0226  | 299.0153  |           |        |   |   |     |   |                                             |
| 2   | 301.1499  | 300.1426  |           |        |   |   |     |   |                                             |
| 3   | 301.1562  | 300.1489  |           |        |   |   |     |   |                                             |
| 4   | 301.1611  | 300.1538  |           |        |   |   |     |   |                                             |
| 5   | 301.1714  | 300.1641  |           |        |   |   |     |   |                                             |
| 6   | 305.9528  | 304.9455  |           |        |   |   |     |   |                                             |
| 7   | 307.9514  | 306.9441  |           |        |   |   |     |   |                                             |
| 8   | 308.0271  | 307.0198  |           |        |   |   |     |   |                                             |
| 9   | 309.0632  | 308.0559  |           |        |   |   |     |   |                                             |
| 10  | 309.0973  | 308.0900  |           |        |   |   |     |   |                                             |
| 11  | 311.1737  | 310.1664  |           |        |   |   |     |   |                                             |
| 12  | 312.9832  | 311.9759  |           |        |   |   |     |   |                                             |
| 13  | 313.0961  | 312.0888  |           |        |   |   |     |   |                                             |
| 14  | 315.0642  | 314.0569  |           |        |   |   |     |   |                                             |
| 15  | 315.0667  | 314.0594  |           |        |   |   |     |   |                                             |
| 16  | 315.0670  | 314.0597  |           |        |   |   |     |   |                                             |
| 17  | 315.0680  | 314.0607  |           |        |   |   |     |   |                                             |
| 18  | 315.0689  | 314.0616  |           |        |   |   |     |   |                                             |
| 19  | 315.2316  | 314.2243  |           |        |   |   |     |   |                                             |
| 20  | 315.2350  | 314.2277  |           |        |   |   |     |   |                                             |
| 21  | 317.0646  | 316.0573  |           |        |   |   |     |   |                                             |
| 22  | 322.0896  | 321.0823  |           |        |   |   |     |   |                                             |
| 23  | 322.9079  | 321.9006  |           |        |   |   |     |   |                                             |
| 24  | 322.9219  | 321.9146  |           |        |   |   |     |   |                                             |
| 25  | 324.0315  | 323.0242  |           |        |   |   |     |   |                                             |
| 26  | 325.0964  | 324.0891  |           |        |   |   |     |   |                                             |
| 27  | 332.9781  | 331.9708  |           |        |   |   |     |   |                                             |
| 28  | 333.0402  | 332.0329  |           |        |   |   |     |   |                                             |
| 29  | 333.6491  | 332.6418  |           |        |   |   |     |   |                                             |
| 30  | 338.8961  | 337.8888  |           |        |   |   |     |   |                                             |
| 31  | 340.0163  | 339.0090  |           |        |   |   |     |   |                                             |
| 32  | 340.8851  | 339.8778  |           |        |   |   |     |   |                                             |
| 33  | 341.0215  | 340.0142  |           |        |   |   |     |   |                                             |
| 34  | 341.0225  | 340.0152  |           |        |   |   |     |   |                                             |
| 35  | 341.0247  | 340.0174  |           |        |   |   |     |   |                                             |
| 36  | 341.0261  | 340.0188  |           |        |   |   |     |   |                                             |
| 37  | 341.0267  | 340.0194  |           |        |   |   |     |   |                                             |
| 38  | 341.0269  | 340.0196  |           |        |   |   |     |   |                                             |
| 39  | 341.0484  | 340.0411  |           |        |   |   |     |   |                                             |
| 40  | 341.0866  | 340.0793  |           |        |   |   |     |   |                                             |
| 41  | 342.0295  | 341.0222  |           |        |   |   |     |   |                                             |
| 42  | 342.0844  | 341.0771  |           |        |   |   |     |   |                                             |
| 43  | 342.0868  | 341.0795  |           |        |   |   |     |   |                                             |
| 44  | 342.0894  | 341.0821  |           |        |   |   |     |   |                                             |
| 45  | 342.0905  | 341.0832  |           |        |   |   |     |   |                                             |
| 46  | 342.0916  | 341.0843  |           |        |   |   |     |   |                                             |

|                                     |                     |          |          |
|-------------------------------------|---------------------|----------|----------|
| <input checked="" type="checkbox"/> | <a href="#">47</a>  | 342.9606 | 341.9533 |
| <input checked="" type="checkbox"/> | <a href="#">48</a>  | 343.0220 | 342.0147 |
| <input checked="" type="checkbox"/> | <a href="#">49</a>  | 343.7295 | 342.7222 |
| <input checked="" type="checkbox"/> | <a href="#">50</a>  | 344.2295 | 343.2222 |
| <input checked="" type="checkbox"/> | <a href="#">51</a>  | 344.9496 | 343.9423 |
| <input checked="" type="checkbox"/> | <a href="#">52</a>  | 345.0750 | 344.0677 |
| <input checked="" type="checkbox"/> | <a href="#">53</a>  | 345.2236 | 344.2163 |
| <input checked="" type="checkbox"/> | <a href="#">54</a>  | 346.9440 | 345.9367 |
| <input checked="" type="checkbox"/> | <a href="#">55</a>  | 354.9622 | 353.9549 |
| <input checked="" type="checkbox"/> | <a href="#">56</a>  | 354.9651 | 353.9578 |
| <input checked="" type="checkbox"/> | <a href="#">57</a>  | 355.0676 | 354.0603 |
| <input checked="" type="checkbox"/> | <a href="#">58</a>  | 355.0696 | 354.0623 |
| <input checked="" type="checkbox"/> | <a href="#">59</a>  | 355.0723 | 354.0650 |
| <input checked="" type="checkbox"/> | <a href="#">60</a>  | 355.0738 | 354.0665 |
| <input checked="" type="checkbox"/> | <a href="#">61</a>  | 355.0746 | 354.0673 |
| <input checked="" type="checkbox"/> | <a href="#">62</a>  | 355.0752 | 354.0679 |
| <input checked="" type="checkbox"/> | <a href="#">63</a>  | 355.0760 | 354.0687 |
| <input checked="" type="checkbox"/> | <a href="#">64</a>  | 355.0764 | 354.0691 |
| <input checked="" type="checkbox"/> | <a href="#">65</a>  | 355.0774 | 354.0701 |
| <input checked="" type="checkbox"/> | <a href="#">66</a>  | 355.0786 | 354.0713 |
| <input checked="" type="checkbox"/> | <a href="#">67</a>  | 355.0806 | 354.0733 |
| <input checked="" type="checkbox"/> | <a href="#">68</a>  | 355.0832 | 354.0759 |
| <input checked="" type="checkbox"/> | <a href="#">69</a>  | 356.0023 | 354.9950 |
| <input checked="" type="checkbox"/> | <a href="#">70</a>  | 356.0729 | 355.0656 |
| <input checked="" type="checkbox"/> | <a href="#">71</a>  | 356.0748 | 355.0675 |
| <input checked="" type="checkbox"/> | <a href="#">72</a>  | 356.0748 | 355.0675 |
| <input checked="" type="checkbox"/> | <a href="#">73</a>  | 356.0791 | 355.0718 |
| <input checked="" type="checkbox"/> | <a href="#">74</a>  | 356.9736 | 355.9663 |
| <input checked="" type="checkbox"/> | <a href="#">75</a>  | 357.0002 | 355.9929 |
| <input checked="" type="checkbox"/> | <a href="#">76</a>  | 357.0729 | 356.0656 |
| <input checked="" type="checkbox"/> | <a href="#">77</a>  | 359.0438 | 358.0365 |
| <input checked="" type="checkbox"/> | <a href="#">78</a>  | 365.9749 | 364.9676 |
| <input checked="" type="checkbox"/> | <a href="#">79</a>  | 366.1819 | 365.1746 |
| <input checked="" type="checkbox"/> | <a href="#">80</a>  | 371.2194 | 370.2121 |
| <input checked="" type="checkbox"/> | <a href="#">81</a>  | 374.2417 | 373.2344 |
| <input checked="" type="checkbox"/> | <a href="#">82</a>  | 375.0931 | 374.0858 |
| <input checked="" type="checkbox"/> | <a href="#">83</a>  | 375.0943 | 374.0870 |
| <input checked="" type="checkbox"/> | <a href="#">84</a>  | 375.0979 | 374.0906 |
| <input checked="" type="checkbox"/> | <a href="#">85</a>  | 375.0984 | 374.0911 |
| <input checked="" type="checkbox"/> | <a href="#">86</a>  | 375.0995 | 374.0922 |
| <input checked="" type="checkbox"/> | <a href="#">87</a>  | 376.9003 | 375.8930 |
| <input checked="" type="checkbox"/> | <a href="#">88</a>  | 377.0886 | 376.0813 |
| <input checked="" type="checkbox"/> | <a href="#">89</a>  | 377.0909 | 376.0836 |
| <input checked="" type="checkbox"/> | <a href="#">90</a>  | 377.1556 | 376.1483 |
| <input checked="" type="checkbox"/> | <a href="#">91</a>  | 378.2327 | 377.2254 |
| <input checked="" type="checkbox"/> | <a href="#">92</a>  | 378.9160 | 377.9087 |
| <input checked="" type="checkbox"/> | <a href="#">93</a>  | 385.8234 | 384.8161 |
| <input checked="" type="checkbox"/> | <a href="#">94</a>  | 402.1234 | 401.1161 |
| <input checked="" type="checkbox"/> | <a href="#">95</a>  | 404.2323 | 403.2250 |
| <input checked="" type="checkbox"/> | <a href="#">96</a>  | 414.8633 | 413.8560 |
| <input checked="" type="checkbox"/> | <a href="#">97</a>  | 414.8758 | 413.8685 |
| <input checked="" type="checkbox"/> | <a href="#">98</a>  | 414.9092 | 413.9019 |
| <input checked="" type="checkbox"/> | <a href="#">99</a>  | 415.0326 | 414.0253 |
| <input checked="" type="checkbox"/> | <a href="#">100</a> | 415.0343 | 414.0270 |
| <input checked="" type="checkbox"/> | <a href="#">101</a> | 415.0360 | 414.0287 |
| <input checked="" type="checkbox"/> | <a href="#">102</a> | 415.0377 | 414.0304 |
| <input checked="" type="checkbox"/> | <a href="#">103</a> | 415.0380 | 414.0307 |
| <input checked="" type="checkbox"/> | <a href="#">104</a> | 415.0395 | 414.0322 |
| <input checked="" type="checkbox"/> | <a href="#">105</a> | 415.0411 | 414.0338 |
| <input checked="" type="checkbox"/> | <a href="#">106</a> | 415.0453 | 414.0380 |
| <input checked="" type="checkbox"/> | <a href="#">107</a> | 415.0509 | 414.0436 |
| <input checked="" type="checkbox"/> | <a href="#">108</a> | 415.0523 | 414.0450 |
| <input checked="" type="checkbox"/> | <a href="#">109</a> | 415.0569 | 414.0496 |
| <input checked="" type="checkbox"/> | <a href="#">110</a> | 415.0619 | 414.0546 |
| <input checked="" type="checkbox"/> | <a href="#">111</a> | 415.8512 | 414.8439 |
| <input checked="" type="checkbox"/> | <a href="#">112</a> | 415.8564 | 414.8491 |
| <input checked="" type="checkbox"/> | <a href="#">113</a> | 415.8646 | 414.8573 |
| <input checked="" type="checkbox"/> | <a href="#">114</a> | 415.8731 | 414.8658 |
| <input checked="" type="checkbox"/> | <a href="#">115</a> | 416.0414 | 415.0341 |
| <input checked="" type="checkbox"/> | <a href="#">116</a> | 416.0461 | 415.0388 |
| <input checked="" type="checkbox"/> | <a href="#">117</a> | 417.0393 | 416.0320 |
| <input checked="" type="checkbox"/> | <a href="#">118</a> | 417.2494 | 416.2421 |
| <input checked="" type="checkbox"/> | <a href="#">119</a> | 417.8458 | 416.8385 |
| <input checked="" type="checkbox"/> | <a href="#">120</a> | 417.8559 | 416.8486 |
| <input checked="" type="checkbox"/> | <a href="#">121</a> | 417.8654 | 416.8581 |
| <input checked="" type="checkbox"/> | <a href="#">122</a> | 418.1017 | 417.0944 |
| <input checked="" type="checkbox"/> | <a href="#">123</a> | 418.9891 | 417.9818 |
| <input checked="" type="checkbox"/> | <a href="#">124</a> | 425.9435 | 424.9362 |
| <input checked="" type="checkbox"/> | <a href="#">125</a> | 426.0362 | 425.0289 |
| <input checked="" type="checkbox"/> | <a href="#">126</a> | 429.0944 | 428.0871 |
| <input checked="" type="checkbox"/> | <a href="#">127</a> | 429.0957 | 428.0884 |

|                                     |                     |          |          |
|-------------------------------------|---------------------|----------|----------|
| <input checked="" type="checkbox"/> | <a href="#">128</a> | 429.0975 | 428.0902 |
| <input checked="" type="checkbox"/> | <a href="#">129</a> | 430.0917 | 429.0844 |
| <input checked="" type="checkbox"/> | <a href="#">130</a> | 430.0920 | 429.0847 |
| <input checked="" type="checkbox"/> | <a href="#">131</a> | 430.0957 | 429.0884 |
| <input checked="" type="checkbox"/> | <a href="#">132</a> | 430.0992 | 429.0919 |
| <input checked="" type="checkbox"/> | <a href="#">133</a> | 431.0923 | 430.0850 |
| <input checked="" type="checkbox"/> | <a href="#">134</a> | 431.0932 | 430.0859 |
| <input checked="" type="checkbox"/> | <a href="#">135</a> | 431.0937 | 430.0864 |
| <input checked="" type="checkbox"/> | <a href="#">136</a> | 431.0951 | 430.0878 |
| <input checked="" type="checkbox"/> | <a href="#">137</a> | 431.0982 | 430.0909 |
| <input checked="" type="checkbox"/> | <a href="#">138</a> | 432.0933 | 431.0860 |
| <input checked="" type="checkbox"/> | <a href="#">139</a> | 432.0939 | 431.0866 |
| <input checked="" type="checkbox"/> | <a href="#">140</a> | 432.0958 | 431.0885 |
| <input checked="" type="checkbox"/> | <a href="#">141</a> | 432.0974 | 431.0901 |
| <input checked="" type="checkbox"/> | <a href="#">142</a> | 433.0854 | 432.0781 |
| <input checked="" type="checkbox"/> | <a href="#">143</a> | 433.0930 | 432.0857 |
| <input checked="" type="checkbox"/> | <a href="#">144</a> | 445.1251 | 444.1178 |
| <input checked="" type="checkbox"/> | <a href="#">145</a> | 445.1266 | 444.1193 |
| <input checked="" type="checkbox"/> | <a href="#">146</a> | 445.1275 | 444.1202 |
| <input checked="" type="checkbox"/> | <a href="#">147</a> | 445.1280 | 444.1207 |
| <input checked="" type="checkbox"/> | <a href="#">148</a> | 445.1287 | 444.1214 |
| <input checked="" type="checkbox"/> | <a href="#">149</a> | 445.1289 | 444.1216 |
| <input checked="" type="checkbox"/> | <a href="#">150</a> | 445.1302 | 444.1229 |
| <input checked="" type="checkbox"/> | <a href="#">151</a> | 445.1305 | 444.1232 |
| <input checked="" type="checkbox"/> | <a href="#">152</a> | 445.1331 | 444.1258 |
| <input checked="" type="checkbox"/> | <a href="#">153</a> | 445.1368 | 444.1295 |
| <input checked="" type="checkbox"/> | <a href="#">154</a> | 445.2821 | 444.2748 |
| <input checked="" type="checkbox"/> | <a href="#">156</a> | 445.8061 | 444.7988 |
| <input checked="" type="checkbox"/> | <a href="#">157</a> | 446.1269 | 445.1196 |
| <input checked="" type="checkbox"/> | <a href="#">158</a> | 446.1286 | 445.1213 |
| <input checked="" type="checkbox"/> | <a href="#">159</a> | 446.1309 | 445.1236 |
| <input checked="" type="checkbox"/> | <a href="#">160</a> | 446.1360 | 445.1287 |
| <input checked="" type="checkbox"/> | <a href="#">161</a> | 446.1412 | 445.1339 |
| <input checked="" type="checkbox"/> | <a href="#">162</a> | 446.2843 | 445.2770 |
| <input checked="" type="checkbox"/> | <a href="#">163</a> | 446.2873 | 445.2800 |
| <input checked="" type="checkbox"/> | <a href="#">164</a> | 446.2876 | 445.2803 |
| <input checked="" type="checkbox"/> | <a href="#">165</a> | 446.2899 | 445.2826 |
| <input checked="" type="checkbox"/> | <a href="#">166</a> | 446.2906 | 445.2833 |
| <input checked="" type="checkbox"/> | <a href="#">167</a> | 447.0993 | 446.0920 |
| <input checked="" type="checkbox"/> | <a href="#">168</a> | 447.1175 | 446.1102 |
| <input checked="" type="checkbox"/> | <a href="#">169</a> | 447.1263 | 446.1190 |
| <input checked="" type="checkbox"/> | <a href="#">170</a> | 447.1268 | 446.1195 |
| <input checked="" type="checkbox"/> | <a href="#">171</a> | 447.1297 | 446.1224 |
| <input checked="" type="checkbox"/> | <a href="#">172</a> | 447.1343 | 446.1270 |
| <input checked="" type="checkbox"/> | <a href="#">173</a> | 447.1383 | 446.1310 |
| <input checked="" type="checkbox"/> | <a href="#">174</a> | 448.1143 | 447.1070 |
| <input checked="" type="checkbox"/> | <a href="#">175</a> | 449.7466 | 448.7393 |
| <input checked="" type="checkbox"/> | <a href="#">176</a> | 450.2478 | 449.2405 |
| <input checked="" type="checkbox"/> | <a href="#">177</a> | 461.2213 | 460.2140 |
| <input checked="" type="checkbox"/> | <a href="#">178</a> | 461.7260 | 460.7187 |
| <input checked="" type="checkbox"/> | <a href="#">179</a> | 472.2944 | 471.2871 |
| <input checked="" type="checkbox"/> | <a href="#">181</a> | 500.5695 | 499.5622 |
| <input checked="" type="checkbox"/> | <a href="#">182</a> | 500.5753 | 499.5680 |
| <input checked="" type="checkbox"/> | <a href="#">183</a> | 500.5760 | 499.5687 |
| <input checked="" type="checkbox"/> | <a href="#">184</a> | 500.9095 | 499.9022 |
| <input checked="" type="checkbox"/> | <a href="#">185</a> | 500.9131 | 499.9058 |
| <input checked="" type="checkbox"/> | <a href="#">186</a> | 500.9177 | 499.9104 |
| <input checked="" type="checkbox"/> | <a href="#">187</a> | 501.2471 | 500.2398 |
| <input checked="" type="checkbox"/> | <a href="#">188</a> | 501.2475 | 500.2402 |
| <input checked="" type="checkbox"/> | <a href="#">189</a> | 503.1157 | 502.1084 |
| <input checked="" type="checkbox"/> | <a href="#">190</a> | 503.1174 | 502.1101 |
| <input checked="" type="checkbox"/> | <a href="#">191</a> | 503.1176 | 502.1103 |
| <input checked="" type="checkbox"/> | <a href="#">192</a> | 503.1184 | 502.1111 |
| <input checked="" type="checkbox"/> | <a href="#">193</a> | 503.1201 | 502.1128 |
| <input checked="" type="checkbox"/> | <a href="#">194</a> | 503.1308 | 502.1235 |
| <input checked="" type="checkbox"/> | <a href="#">195</a> | 504.1160 | 503.1087 |
| <input checked="" type="checkbox"/> | <a href="#">196</a> | 504.1167 | 503.1094 |
| <input checked="" type="checkbox"/> | <a href="#">197</a> | 505.1104 | 504.1031 |
| <input checked="" type="checkbox"/> | <a href="#">198</a> | 505.1158 | 504.1085 |
| <input checked="" type="checkbox"/> | <a href="#">199</a> | 505.1231 | 504.1158 |
| <input checked="" type="checkbox"/> | <a href="#">200</a> | 506.1123 | 505.1050 |
| <input checked="" type="checkbox"/> | <a href="#">202</a> | 519.1440 | 518.1367 |
| <input checked="" type="checkbox"/> | <a href="#">203</a> | 519.1457 | 518.1384 |
| <input checked="" type="checkbox"/> | <a href="#">204</a> | 519.1489 | 518.1416 |
| <input checked="" type="checkbox"/> | <a href="#">205</a> | 519.1493 | 518.1420 |
| <input checked="" type="checkbox"/> | <a href="#">206</a> | 519.3159 | 518.3086 |
| <input checked="" type="checkbox"/> | <a href="#">207</a> | 519.3237 | 518.3164 |
| <input checked="" type="checkbox"/> | <a href="#">208</a> | 521.1315 | 520.1242 |
| <input checked="" type="checkbox"/> | <a href="#">209</a> | 521.1358 | 520.1285 |
| <input checked="" type="checkbox"/> | <a href="#">210</a> | 525.7811 | 524.7738 |
| <input checked="" type="checkbox"/> | <a href="#">211</a> | 528.3071 | 527.2998 |

|                                     |                     |          |          |
|-------------------------------------|---------------------|----------|----------|
| <input checked="" type="checkbox"/> | <a href="#">212</a> | 529.7824 | 528.7751 |
| <input checked="" type="checkbox"/> | <a href="#">214</a> | 536.1706 | 535.1633 |
| <input checked="" type="checkbox"/> | <a href="#">215</a> | 536.1713 | 535.1640 |
| <input checked="" type="checkbox"/> | <a href="#">216</a> | 536.1730 | 535.1657 |
| <input checked="" type="checkbox"/> | <a href="#">217</a> | 536.1737 | 535.1664 |
| <input checked="" type="checkbox"/> | <a href="#">218</a> | 536.1744 | 535.1671 |
| <input checked="" type="checkbox"/> | <a href="#">219</a> | 536.1745 | 535.1672 |
| <input checked="" type="checkbox"/> | <a href="#">220</a> | 536.1812 | 535.1739 |
| <input checked="" type="checkbox"/> | <a href="#">221</a> | 536.8585 | 535.8512 |
| <input checked="" type="checkbox"/> | <a href="#">222</a> | 536.8828 | 535.8755 |
| <input checked="" type="checkbox"/> | <a href="#">223</a> | 537.1801 | 536.1728 |
| <input checked="" type="checkbox"/> | <a href="#">224</a> | 538.1652 | 537.1579 |
| <input checked="" type="checkbox"/> | <a href="#">225</a> | 538.1685 | 537.1612 |
| <input checked="" type="checkbox"/> | <a href="#">226</a> | 538.7639 | 537.7566 |
| <input checked="" type="checkbox"/> | <a href="#">227</a> | 539.1697 | 538.1624 |
| <input checked="" type="checkbox"/> | <a href="#">228</a> | 540.8604 | 539.8531 |
| <input checked="" type="checkbox"/> | <a href="#">229</a> | 540.8785 | 539.8712 |
| <input checked="" type="checkbox"/> | <a href="#">230</a> | 553.0611 | 552.0538 |
| <input checked="" type="checkbox"/> | <a href="#">231</a> | 556.0690 | 555.0617 |
| <input checked="" type="checkbox"/> | <a href="#">232</a> | 580.8301 | 579.8228 |
| <input checked="" type="checkbox"/> | <a href="#">233</a> | 581.3103 | 580.3030 |
| <input checked="" type="checkbox"/> | <a href="#">234</a> | 581.7997 | 580.7924 |
| <input checked="" type="checkbox"/> | <a href="#">235</a> | 582.2520 | 581.2447 |
| <input checked="" type="checkbox"/> | <a href="#">236</a> | 582.9348 | 581.9275 |
| <input checked="" type="checkbox"/> | <a href="#">237</a> | 588.3419 | 587.3346 |
| <input checked="" type="checkbox"/> | <a href="#">238</a> | 597.8699 | 596.8626 |
| <input checked="" type="checkbox"/> | <a href="#">239</a> | 598.2394 | 597.2321 |
| <input checked="" type="checkbox"/> | <a href="#">240</a> | 598.2418 | 597.2345 |
| <input checked="" type="checkbox"/> | <a href="#">241</a> | 598.2443 | 597.2370 |
| <input checked="" type="checkbox"/> | <a href="#">242</a> | 300.0219 | 598.0292 |
| <input checked="" type="checkbox"/> | <a href="#">243</a> | 599.2518 | 598.2445 |
| <input checked="" type="checkbox"/> | <a href="#">244</a> | 600.3033 | 599.2960 |
| <input checked="" type="checkbox"/> | <a href="#">246</a> | 600.7967 | 599.7894 |
| <input checked="" type="checkbox"/> | <a href="#">247</a> | 600.8087 | 599.8014 |
| <input checked="" type="checkbox"/> | <a href="#">248</a> | 301.0960 | 600.1774 |
| <input checked="" type="checkbox"/> | <a href="#">249</a> | 301.1556 | 600.2966 |
| <input checked="" type="checkbox"/> | <a href="#">251</a> | 301.1781 | 600.3416 |
| <input checked="" type="checkbox"/> | <a href="#">252</a> | 301.1829 | 600.3512 |
| <input checked="" type="checkbox"/> | <a href="#">253</a> | 605.0685 | 604.0612 |
| <input checked="" type="checkbox"/> | <a href="#">254</a> | 304.0132 | 606.0118 |
| <input checked="" type="checkbox"/> | <a href="#">255</a> | 607.0647 | 606.0574 |
| <input checked="" type="checkbox"/> | <a href="#">257</a> | 607.8162 | 606.8089 |
| <input checked="" type="checkbox"/> | <a href="#">258</a> | 610.1964 | 609.1891 |
| <input checked="" type="checkbox"/> | <a href="#">259</a> | 610.2040 | 609.1967 |
| <input checked="" type="checkbox"/> | <a href="#">260</a> | 305.9519 | 609.8892 |
| <input checked="" type="checkbox"/> | <a href="#">261</a> | 307.9505 | 613.8864 |
| <input checked="" type="checkbox"/> | <a href="#">262</a> | 308.0223 | 614.0300 |
| <input checked="" type="checkbox"/> | <a href="#">263</a> | 311.6292 | 621.2438 |
| <input checked="" type="checkbox"/> | <a href="#">264</a> | 312.9918 | 623.9690 |
| <input checked="" type="checkbox"/> | <a href="#">265</a> | 313.1710 | 624.3274 |
| <input checked="" type="checkbox"/> | <a href="#">266</a> | 315.0595 | 628.1044 |
| <input checked="" type="checkbox"/> | <a href="#">267</a> | 315.0653 | 628.1160 |
| <input checked="" type="checkbox"/> | <a href="#">268</a> | 315.0656 | 628.1166 |
| <input checked="" type="checkbox"/> | <a href="#">269</a> | 315.0695 | 628.1244 |
| <input checked="" type="checkbox"/> | <a href="#">272</a> | 631.8058 | 630.7985 |
| <input checked="" type="checkbox"/> | <a href="#">275</a> | 321.0964 | 640.1782 |
| <input checked="" type="checkbox"/> | <a href="#">276</a> | 322.0926 | 642.1706 |
| <input checked="" type="checkbox"/> | <a href="#">277</a> | 645.7817 | 644.7744 |
| <input checked="" type="checkbox"/> | <a href="#">278</a> | 647.1479 | 646.1406 |
| <input checked="" type="checkbox"/> | <a href="#">279</a> | 647.2982 | 646.2909 |
| <input checked="" type="checkbox"/> | <a href="#">280</a> | 648.3733 | 647.3660 |
| <input checked="" type="checkbox"/> | <a href="#">281</a> | 325.1739 | 648.3332 |
| <input checked="" type="checkbox"/> | <a href="#">282</a> | 651.8560 | 650.8487 |
| <input checked="" type="checkbox"/> | <a href="#">283</a> | 653.6557 | 652.6484 |
| <input checked="" type="checkbox"/> | <a href="#">284</a> | 653.9991 | 652.9918 |
| <input checked="" type="checkbox"/> | <a href="#">285</a> | 654.3298 | 653.3225 |
| <input checked="" type="checkbox"/> | <a href="#">286</a> | 655.8140 | 654.8067 |
| <input checked="" type="checkbox"/> | <a href="#">287</a> | 329.1692 | 656.3238 |
| <input checked="" type="checkbox"/> | <a href="#">288</a> | 333.0366 | 664.0586 |
| <input checked="" type="checkbox"/> | <a href="#">289</a> | 333.0381 | 664.0616 |
| <input checked="" type="checkbox"/> | <a href="#">290</a> | 671.8058 | 670.7985 |
| <input checked="" type="checkbox"/> | <a href="#">291</a> | 672.2556 | 671.2483 |
| <input checked="" type="checkbox"/> | <a href="#">294</a> | 676.8664 | 675.8591 |
| <input checked="" type="checkbox"/> | <a href="#">295</a> | 341.0230 | 680.0314 |
| <input checked="" type="checkbox"/> | <a href="#">296</a> | 341.0260 | 680.0374 |
| <input checked="" type="checkbox"/> | <a href="#">297</a> | 341.6445 | 681.2744 |
| <input checked="" type="checkbox"/> | <a href="#">298</a> | 342.0403 | 682.0660 |
| <input checked="" type="checkbox"/> | <a href="#">299</a> | 342.0908 | 682.1670 |
| <input checked="" type="checkbox"/> | <a href="#">300</a> | 343.0520 | 684.0894 |
| <input checked="" type="checkbox"/> | <a href="#">307</a> | 355.0086 | 708.0026 |
| <input checked="" type="checkbox"/> | <a href="#">308</a> | 355.0699 | 708.1252 |

|                                     |                     |          |          |
|-------------------------------------|---------------------|----------|----------|
| <input checked="" type="checkbox"/> | <a href="#">309</a> | 355.0714 | 708.1282 |
| <input checked="" type="checkbox"/> | <a href="#">310</a> | 355.0716 | 708.1286 |
| <input checked="" type="checkbox"/> | <a href="#">311</a> | 355.0768 | 708.1390 |
| <input checked="" type="checkbox"/> | <a href="#">312</a> | 357.0765 | 712.1384 |
| <input checked="" type="checkbox"/> | <a href="#">313</a> | 357.0783 | 712.1420 |
| <input checked="" type="checkbox"/> | <a href="#">314</a> | 357.0813 | 712.1480 |
| <input checked="" type="checkbox"/> | <a href="#">315</a> | 715.0626 | 714.0553 |
| <input checked="" type="checkbox"/> | <a href="#">316</a> | 717.2094 | 716.2021 |
| <input checked="" type="checkbox"/> | <a href="#">317</a> | 719.2115 | 718.2042 |
| <input checked="" type="checkbox"/> | <a href="#">318</a> | 363.9105 | 725.8064 |
| <input checked="" type="checkbox"/> | <a href="#">319</a> | 365.9737 | 729.9328 |
| <input checked="" type="checkbox"/> | <a href="#">320</a> | 367.9813 | 733.9480 |
| <input checked="" type="checkbox"/> | <a href="#">321</a> | 735.2515 | 734.2442 |
| <input checked="" type="checkbox"/> | <a href="#">322</a> | 735.6586 | 734.6513 |
| <input checked="" type="checkbox"/> | <a href="#">323</a> | 371.2217 | 740.4288 |
| <input checked="" type="checkbox"/> | <a href="#">325</a> | 743.7808 | 742.7735 |
| <input checked="" type="checkbox"/> | <a href="#">326</a> | 377.0889 | 752.1632 |
| <input checked="" type="checkbox"/> | <a href="#">327</a> | 377.1041 | 752.1936 |
| <input checked="" type="checkbox"/> | <a href="#">328</a> | 378.7470 | 755.4794 |
| <input checked="" type="checkbox"/> | <a href="#">330</a> | 380.1723 | 758.3300 |
| <input checked="" type="checkbox"/> | <a href="#">331</a> | 764.6671 | 763.6598 |
| <input checked="" type="checkbox"/> | <a href="#">332</a> | 766.6816 | 765.6743 |
| <input checked="" type="checkbox"/> | <a href="#">333</a> | 768.4365 | 767.4292 |
| <input checked="" type="checkbox"/> | <a href="#">334</a> | 768.6876 | 767.6803 |
| <input checked="" type="checkbox"/> | <a href="#">335</a> | 768.9266 | 767.9193 |
| <input checked="" type="checkbox"/> | <a href="#">336</a> | 769.0150 | 768.0077 |
| <input checked="" type="checkbox"/> | <a href="#">337</a> | 776.5955 | 775.5882 |
| <input checked="" type="checkbox"/> | <a href="#">338</a> | 776.6066 | 775.5993 |
| <input checked="" type="checkbox"/> | <a href="#">339</a> | 776.7003 | 775.6930 |
| <input checked="" type="checkbox"/> | <a href="#">340</a> | 776.8279 | 775.8206 |
| <input checked="" type="checkbox"/> | <a href="#">341</a> | 776.8330 | 775.8257 |
| <input checked="" type="checkbox"/> | <a href="#">342</a> | 776.8347 | 775.8274 |
| <input checked="" type="checkbox"/> | <a href="#">343</a> | 776.8354 | 775.8281 |
| <input checked="" type="checkbox"/> | <a href="#">344</a> | 776.8408 | 775.8335 |
| <input checked="" type="checkbox"/> | <a href="#">345</a> | 776.8497 | 775.8424 |
| <input checked="" type="checkbox"/> | <a href="#">346</a> | 776.8613 | 775.8540 |
| <input checked="" type="checkbox"/> | <a href="#">347</a> | 777.0920 | 776.0847 |
| <input checked="" type="checkbox"/> | <a href="#">348</a> | 777.0993 | 776.0920 |
| <input checked="" type="checkbox"/> | <a href="#">349</a> | 777.3115 | 776.3042 |
| <input checked="" type="checkbox"/> | <a href="#">350</a> | 777.3357 | 776.3284 |
| <input checked="" type="checkbox"/> | <a href="#">351</a> | 777.3363 | 776.3290 |
| <input checked="" type="checkbox"/> | <a href="#">352</a> | 777.3436 | 776.3363 |
| <input checked="" type="checkbox"/> | <a href="#">353</a> | 777.3442 | 776.3369 |
| <input checked="" type="checkbox"/> | <a href="#">354</a> | 778.4701 | 777.4628 |
| <input checked="" type="checkbox"/> | <a href="#">355</a> | 778.7656 | 777.7583 |
| <input checked="" type="checkbox"/> | <a href="#">356</a> | 779.8745 | 778.8672 |
| <input checked="" type="checkbox"/> | <a href="#">357</a> | 779.8841 | 778.8768 |
| <input checked="" type="checkbox"/> | <a href="#">359</a> | 391.8338 | 781.6530 |
| <input checked="" type="checkbox"/> | <a href="#">360</a> | 783.7374 | 782.7301 |
| <input checked="" type="checkbox"/> | <a href="#">361</a> | 784.0562 | 783.0489 |
| <input checked="" type="checkbox"/> | <a href="#">362</a> | 784.3928 | 783.3855 |
| <input checked="" type="checkbox"/> | <a href="#">363</a> | 785.8331 | 784.8258 |
| <input checked="" type="checkbox"/> | <a href="#">364</a> | 785.8378 | 784.8305 |
| <input checked="" type="checkbox"/> | <a href="#">365</a> | 785.8421 | 784.8348 |
| <input checked="" type="checkbox"/> | <a href="#">366</a> | 785.8471 | 784.8398 |
| <input checked="" type="checkbox"/> | <a href="#">367</a> | 786.3374 | 785.3301 |
| <input checked="" type="checkbox"/> | <a href="#">368</a> | 786.3397 | 785.3324 |
| <input checked="" type="checkbox"/> | <a href="#">369</a> | 786.3427 | 785.3354 |
| <input checked="" type="checkbox"/> | <a href="#">370</a> | 786.3428 | 785.3355 |
| <input checked="" type="checkbox"/> | <a href="#">371</a> | 786.3466 | 785.3393 |
| <input checked="" type="checkbox"/> | <a href="#">372</a> | 786.8060 | 785.7987 |
| <input checked="" type="checkbox"/> | <a href="#">373</a> | 786.8641 | 785.8568 |
| <input checked="" type="checkbox"/> | <a href="#">374</a> | 787.3468 | 786.3395 |
| <input checked="" type="checkbox"/> | <a href="#">375</a> | 787.3529 | 786.3456 |
| <input checked="" type="checkbox"/> | <a href="#">376</a> | 788.7139 | 787.7066 |
| <input checked="" type="checkbox"/> | <a href="#">377</a> | 798.4542 | 797.4469 |
| <input checked="" type="checkbox"/> | <a href="#">378</a> | 798.4572 | 797.4499 |
| <input checked="" type="checkbox"/> | <a href="#">379</a> | 798.8981 | 797.8908 |
| <input checked="" type="checkbox"/> | <a href="#">380</a> | 801.2337 | 800.2264 |
| <input checked="" type="checkbox"/> | <a href="#">383</a> | 812.9364 | 811.9291 |
| <input checked="" type="checkbox"/> | <a href="#">384</a> | 813.4753 | 812.4680 |
| <input checked="" type="checkbox"/> | <a href="#">385</a> | 815.6945 | 814.6872 |
| <input checked="" type="checkbox"/> | <a href="#">386</a> | 816.2376 | 815.2303 |
| <input checked="" type="checkbox"/> | <a href="#">387</a> | 816.8932 | 815.8859 |
| <input checked="" type="checkbox"/> | <a href="#">388</a> | 817.4152 | 816.4079 |
| <input checked="" type="checkbox"/> | <a href="#">389</a> | 817.4265 | 816.4192 |
| <input checked="" type="checkbox"/> | <a href="#">390</a> | 818.4018 | 817.3945 |
| <input checked="" type="checkbox"/> | <a href="#">391</a> | 819.3159 | 818.3086 |
| <input checked="" type="checkbox"/> | <a href="#">392</a> | 820.6399 | 819.6326 |
| <input checked="" type="checkbox"/> | <a href="#">393</a> | 821.1201 | 820.1128 |
| <input checked="" type="checkbox"/> | <a href="#">395</a> | 823.3724 | 822.3651 |



|                                     |                     |           |           |
|-------------------------------------|---------------------|-----------|-----------|
| <input checked="" type="checkbox"/> | <a href="#">396</a> | 823.7456  | 822.7383  |
| <input checked="" type="checkbox"/> | <a href="#">397</a> | 414.8913  | 827.7680  |
| <input checked="" type="checkbox"/> | <a href="#">398</a> | 415.0452  | 828.0758  |
| <input checked="" type="checkbox"/> | <a href="#">399</a> | 830.2775  | 829.2702  |
| <input checked="" type="checkbox"/> | <a href="#">401</a> | 837.4243  | 836.4170  |
| <input checked="" type="checkbox"/> | <a href="#">402</a> | 838.5903  | 837.5830  |
| <input checked="" type="checkbox"/> | <a href="#">403</a> | 841.7367  | 840.7294  |
| <input checked="" type="checkbox"/> | <a href="#">405</a> | 845.1757  | 844.1684  |
| <input checked="" type="checkbox"/> | <a href="#">407</a> | 849.6374  | 848.6301  |
| <input checked="" type="checkbox"/> | <a href="#">408</a> | 849.7866  | 848.7793  |
| <input checked="" type="checkbox"/> | <a href="#">409</a> | 851.4526  | 850.4453  |
| <input checked="" type="checkbox"/> | <a href="#">410</a> | 857.9733  | 856.9660  |
| <input checked="" type="checkbox"/> | <a href="#">411</a> | 860.7335  | 859.7262  |
| <input checked="" type="checkbox"/> | <a href="#">412</a> | 431.0923  | 860.1700  |
| <input checked="" type="checkbox"/> | <a href="#">413</a> | 862.0374  | 861.0301  |
| <input checked="" type="checkbox"/> | <a href="#">415</a> | 870.7036  | 869.6963  |
| <input checked="" type="checkbox"/> | <a href="#">416</a> | 880.8088  | 879.8015  |
| <input checked="" type="checkbox"/> | <a href="#">417</a> | 881.1193  | 880.1120  |
| <input checked="" type="checkbox"/> | <a href="#">419</a> | 888.5085  | 887.5012  |
| <input checked="" type="checkbox"/> | <a href="#">420</a> | 445.1362  | 888.2578  |
| <input checked="" type="checkbox"/> | <a href="#">422</a> | 446.1226  | 890.2306  |
| <input checked="" type="checkbox"/> | <a href="#">423</a> | 446.1356  | 890.2566  |
| <input checked="" type="checkbox"/> | <a href="#">427</a> | 446.2776  | 890.5406  |
| <input checked="" type="checkbox"/> | <a href="#">428</a> | 446.2813  | 890.5480  |
| <input checked="" type="checkbox"/> | <a href="#">429</a> | 446.2857  | 890.5568  |
| <input checked="" type="checkbox"/> | <a href="#">430</a> | 446.2881  | 890.5616  |
| <input checked="" type="checkbox"/> | <a href="#">431</a> | 447.1323  | 892.2500  |
| <input checked="" type="checkbox"/> | <a href="#">432</a> | 896.6285  | 895.6212  |
| <input checked="" type="checkbox"/> | <a href="#">433</a> | 897.0573  | 896.0500  |
| <input checked="" type="checkbox"/> | <a href="#">434</a> | 898.1887  | 897.1814  |
| <input checked="" type="checkbox"/> | <a href="#">437</a> | 899.5178  | 898.5105  |
| <input checked="" type="checkbox"/> | <a href="#">438</a> | 899.6995  | 898.6922  |
| <input checked="" type="checkbox"/> | <a href="#">439</a> | 900.0301  | 899.0228  |
| <input checked="" type="checkbox"/> | <a href="#">440</a> | 902.5184  | 901.5111  |
| <input checked="" type="checkbox"/> | <a href="#">444</a> | 913.8610  | 912.8537  |
| <input checked="" type="checkbox"/> | <a href="#">445</a> | 915.2546  | 914.2473  |
| <input checked="" type="checkbox"/> | <a href="#">446</a> | 915.5565  | 914.5492  |
| <input checked="" type="checkbox"/> | <a href="#">447</a> | 915.7029  | 914.6956  |
| <input checked="" type="checkbox"/> | <a href="#">448</a> | 915.7895  | 914.7822  |
| <input checked="" type="checkbox"/> | <a href="#">449</a> | 919.6974  | 918.6901  |
| <input checked="" type="checkbox"/> | <a href="#">450</a> | 920.1298  | 919.1225  |
| <input checked="" type="checkbox"/> | <a href="#">451</a> | 922.8311  | 921.8238  |
| <input checked="" type="checkbox"/> | <a href="#">452</a> | 924.2578  | 923.2505  |
| <input checked="" type="checkbox"/> | <a href="#">456</a> | 941.0922  | 940.0849  |
| <input checked="" type="checkbox"/> | <a href="#">457</a> | 315.0633  | 942.1681  |
| <input checked="" type="checkbox"/> | <a href="#">458</a> | 317.0587  | 948.1543  |
| <input checked="" type="checkbox"/> | <a href="#">459</a> | 475.2968  | 948.5790  |
| <input checked="" type="checkbox"/> | <a href="#">462</a> | 957.1169  | 956.1096  |
| <input checked="" type="checkbox"/> | <a href="#">463</a> | 962.7478  | 961.7405  |
| <input checked="" type="checkbox"/> | <a href="#">464</a> | 963.0892  | 962.0819  |
| <input checked="" type="checkbox"/> | <a href="#">465</a> | 967.9174  | 966.9101  |
| <input checked="" type="checkbox"/> | <a href="#">466</a> | 968.1363  | 967.1290  |
| <input checked="" type="checkbox"/> | <a href="#">467</a> | 968.4897  | 967.4824  |
| <input checked="" type="checkbox"/> | <a href="#">468</a> | 969.1295  | 968.1222  |
| <input checked="" type="checkbox"/> | <a href="#">469</a> | 970.4609  | 969.4536  |
| <input checked="" type="checkbox"/> | <a href="#">471</a> | 980.0015  | 978.9942  |
| <input checked="" type="checkbox"/> | <a href="#">472</a> | 980.0056  | 978.9983  |
| <input checked="" type="checkbox"/> | <a href="#">473</a> | 980.4962  | 979.4889  |
| <input checked="" type="checkbox"/> | <a href="#">474</a> | 980.5060  | 979.4987  |
| <input checked="" type="checkbox"/> | <a href="#">481</a> | 500.5687  | 999.1228  |
| <input checked="" type="checkbox"/> | <a href="#">482</a> | 500.5759  | 999.1372  |
| <input checked="" type="checkbox"/> | <a href="#">483</a> | 501.2654  | 1000.5162 |
| <input checked="" type="checkbox"/> | <a href="#">484</a> | 1004.0667 | 1003.0594 |
| <input checked="" type="checkbox"/> | <a href="#">485</a> | 504.1158  | 1006.2170 |
| <input checked="" type="checkbox"/> | <a href="#">490</a> | 343.6946  | 1028.0620 |
| <input checked="" type="checkbox"/> | <a href="#">492</a> | 1034.7859 | 1033.7786 |
| <input checked="" type="checkbox"/> | <a href="#">493</a> | 1035.1492 | 1034.1419 |
| <input checked="" type="checkbox"/> | <a href="#">494</a> | 1035.4902 | 1034.4829 |
| <input checked="" type="checkbox"/> | <a href="#">497</a> | 519.1487  | 1036.2828 |
| <input checked="" type="checkbox"/> | <a href="#">499</a> | 1039.7976 | 1038.7903 |
| <input checked="" type="checkbox"/> | <a href="#">500</a> | 1040.5476 | 1039.5403 |
| <input checked="" type="checkbox"/> | <a href="#">505</a> | 528.3087  | 1054.6028 |
| <input checked="" type="checkbox"/> | <a href="#">521</a> | 355.0849  | 1062.2329 |
| <input checked="" type="checkbox"/> | <a href="#">523</a> | 536.1694  | 1070.3242 |
| <input checked="" type="checkbox"/> | <a href="#">524</a> | 536.1718  | 1070.3290 |
| <input checked="" type="checkbox"/> | <a href="#">525</a> | 537.1768  | 1072.3390 |
| <input checked="" type="checkbox"/> | <a href="#">526</a> | 537.1837  | 1072.3528 |
| <input checked="" type="checkbox"/> | <a href="#">527</a> | 538.1855  | 1074.3564 |
| <input checked="" type="checkbox"/> | <a href="#">528</a> | 538.1870  | 1074.3594 |
| <input checked="" type="checkbox"/> | <a href="#">532</a> | 1084.8878 | 1083.8805 |
| <input checked="" type="checkbox"/> | <a href="#">533</a> | 1085.2523 | 1084.2450 |

|                                     |                     |           |           |
|-------------------------------------|---------------------|-----------|-----------|
| <input checked="" type="checkbox"/> | <a href="#">534</a> | 1086.2480 | 1085.2407 |
| <input checked="" type="checkbox"/> | <a href="#">535</a> | 1086.8662 | 1085.8589 |
| <input checked="" type="checkbox"/> | <a href="#">540</a> | 553.5438  | 1105.0730 |
| <input checked="" type="checkbox"/> | <a href="#">541</a> | 554.0579  | 1106.1012 |
| <input checked="" type="checkbox"/> | <a href="#">542</a> | 554.5394  | 1107.0642 |
| <input checked="" type="checkbox"/> | <a href="#">543</a> | 555.0557  | 1108.0968 |
| <input checked="" type="checkbox"/> | <a href="#">544</a> | 556.5324  | 1111.0502 |
| <input checked="" type="checkbox"/> | <a href="#">550</a> | 1130.9424 | 1129.9351 |
| <input checked="" type="checkbox"/> | <a href="#">561</a> | 582.2452  | 1162.4758 |
| <input checked="" type="checkbox"/> | <a href="#">562</a> | 582.2461  | 1162.4776 |
| <input checked="" type="checkbox"/> | <a href="#">566</a> | 588.3422  | 1174.6698 |
| <input checked="" type="checkbox"/> | <a href="#">574</a> | 598.2422  | 1194.4698 |
| <input checked="" type="checkbox"/> | <a href="#">575</a> | 598.2469  | 1194.4792 |
| <input checked="" type="checkbox"/> | <a href="#">579</a> | 605.0485  | 1208.0824 |
| <input checked="" type="checkbox"/> | <a href="#">580</a> | 605.5365  | 1209.0584 |
| <input checked="" type="checkbox"/> | <a href="#">581</a> | 606.0610  | 1210.1074 |
| <input checked="" type="checkbox"/> | <a href="#">583</a> | 607.0651  | 1212.1156 |
| <input checked="" type="checkbox"/> | <a href="#">585</a> | 608.0646  | 1214.1146 |
| <input checked="" type="checkbox"/> | <a href="#">586</a> | 608.5372  | 1215.0598 |
| <input checked="" type="checkbox"/> | <a href="#">587</a> | 609.5399  | 1217.0652 |
| <input checked="" type="checkbox"/> | <a href="#">588</a> | 1218.7135 | 1217.7062 |
| <input checked="" type="checkbox"/> | <a href="#">589</a> | 610.2018  | 1218.3890 |
| <input checked="" type="checkbox"/> | <a href="#">590</a> | 610.5284  | 1219.0422 |
| <input checked="" type="checkbox"/> | <a href="#">591</a> | 611.5313  | 1221.0480 |
| <input checked="" type="checkbox"/> | <a href="#">598</a> | 624.0483  | 1246.0820 |
| <input checked="" type="checkbox"/> | <a href="#">599</a> | 627.3233  | 1252.6320 |
| <input checked="" type="checkbox"/> | <a href="#">609</a> | 641.3354  | 1280.6562 |
| <input checked="" type="checkbox"/> | <a href="#">610</a> | 641.5300  | 1281.0454 |
| <input checked="" type="checkbox"/> | <a href="#">611</a> | 641.5305  | 1281.0464 |
| <input checked="" type="checkbox"/> | <a href="#">612</a> | 641.7771  | 1281.5396 |
| <input checked="" type="checkbox"/> | <a href="#">613</a> | 641.7777  | 1281.5408 |
| <input checked="" type="checkbox"/> | <a href="#">616</a> | 644.2595  | 1286.5044 |
| <input checked="" type="checkbox"/> | <a href="#">617</a> | 645.5241  | 1289.0336 |
| <input checked="" type="checkbox"/> | <a href="#">618</a> | 645.7799  | 1289.5452 |
| <input checked="" type="checkbox"/> | <a href="#">621</a> | 648.3745  | 1294.7344 |
| <input checked="" type="checkbox"/> | <a href="#">622</a> | 649.5335  | 1297.0524 |
| <input checked="" type="checkbox"/> | <a href="#">623</a> | 649.7742  | 1297.5338 |
| <input checked="" type="checkbox"/> | <a href="#">625</a> | 1302.0707 | 1301.0634 |
| <input checked="" type="checkbox"/> | <a href="#">628</a> | 1303.1967 | 1302.1894 |
| <input checked="" type="checkbox"/> | <a href="#">637</a> | 655.8581  | 1309.7016 |
| <input checked="" type="checkbox"/> | <a href="#">638</a> | 1313.2651 | 1312.2578 |
| <input checked="" type="checkbox"/> | <a href="#">644</a> | 1319.8895 | 1318.8822 |
| <input checked="" type="checkbox"/> | <a href="#">645</a> | 1320.5833 | 1319.5760 |
| <input checked="" type="checkbox"/> | <a href="#">646</a> | 1321.4066 | 1320.3993 |
| <input checked="" type="checkbox"/> | <a href="#">647</a> | 1322.7480 | 1321.7407 |
| <input checked="" type="checkbox"/> | <a href="#">648</a> | 1322.9954 | 1321.9881 |
| <input checked="" type="checkbox"/> | <a href="#">649</a> | 1324.2865 | 1323.2792 |
| <input checked="" type="checkbox"/> | <a href="#">650</a> | 664.3196  | 1326.6246 |
| <input checked="" type="checkbox"/> | <a href="#">651</a> | 665.3572  | 1328.6998 |
| <input checked="" type="checkbox"/> | <a href="#">655</a> | 1340.6353 | 1339.6280 |
| <input checked="" type="checkbox"/> | <a href="#">659</a> | 1343.6578 | 1342.6505 |
| <input checked="" type="checkbox"/> | <a href="#">660</a> | 672.3425  | 1342.6704 |
| <input checked="" type="checkbox"/> | <a href="#">661</a> | 1343.8400 | 1342.8327 |
| <input checked="" type="checkbox"/> | <a href="#">662</a> | 672.8325  | 1343.6504 |
| <input checked="" type="checkbox"/> | <a href="#">665</a> | 675.8490  | 1349.6834 |
| <input checked="" type="checkbox"/> | <a href="#">670</a> | 1357.9689 | 1356.9616 |
| <input checked="" type="checkbox"/> | <a href="#">671</a> | 1358.2532 | 1357.2459 |
| <input checked="" type="checkbox"/> | <a href="#">672</a> | 1358.6161 | 1357.6088 |
| <input checked="" type="checkbox"/> | <a href="#">673</a> | 1363.3037 | 1362.2964 |
| <input checked="" type="checkbox"/> | <a href="#">674</a> | 1363.5789 | 1362.5716 |
| <input checked="" type="checkbox"/> | <a href="#">675</a> | 1363.9362 | 1362.9289 |
| <input checked="" type="checkbox"/> | <a href="#">676</a> | 1364.2750 | 1363.2677 |
| <input checked="" type="checkbox"/> | <a href="#">686</a> | 699.8782  | 1397.7418 |
| <input checked="" type="checkbox"/> | <a href="#">692</a> | 708.4047  | 1414.7948 |
| <input checked="" type="checkbox"/> | <a href="#">693</a> | 708.4058  | 1414.7970 |
| <input checked="" type="checkbox"/> | <a href="#">695</a> | 715.0639  | 1428.1132 |
| <input checked="" type="checkbox"/> | <a href="#">696</a> | 715.5601  | 1429.1056 |
| <input checked="" type="checkbox"/> | <a href="#">697</a> | 716.0361  | 1430.0576 |
| <input checked="" type="checkbox"/> | <a href="#">698</a> | 716.5448  | 1431.0750 |
| <input checked="" type="checkbox"/> | <a href="#">699</a> | 717.0455  | 1432.0764 |
| <input checked="" type="checkbox"/> | <a href="#">700</a> | 717.5436  | 1433.0726 |
| <input checked="" type="checkbox"/> | <a href="#">701</a> | 718.0258  | 1434.0370 |
| <input checked="" type="checkbox"/> | <a href="#">702</a> | 718.3358  | 1434.6570 |
| <input checked="" type="checkbox"/> | <a href="#">703</a> | 718.5233  | 1435.0320 |
| <input checked="" type="checkbox"/> | <a href="#">704</a> | 736.7929  | 1471.5712 |
| <input checked="" type="checkbox"/> | <a href="#">714</a> | 1527.5295 | 1526.5222 |
| <input checked="" type="checkbox"/> | <a href="#">716</a> | 1528.9178 | 1527.9105 |
| <input checked="" type="checkbox"/> | <a href="#">717</a> | 1529.1819 | 1528.1746 |
| <input checked="" type="checkbox"/> | <a href="#">720</a> | 768.4321  | 1534.8496 |
| <input checked="" type="checkbox"/> | <a href="#">721</a> | 768.7252  | 1535.4358 |
| <input checked="" type="checkbox"/> | <a href="#">722</a> | 770.2192  | 1538.4238 |

|                                     |                     |          |           |
|-------------------------------------|---------------------|----------|-----------|
| <input checked="" type="checkbox"/> | <a href="#">724</a> | 776.5931 | 1551.1716 |
| <input checked="" type="checkbox"/> | <a href="#">725</a> | 776.8279 | 1551.6412 |
| <input checked="" type="checkbox"/> | <a href="#">726</a> | 776.8310 | 1551.6474 |
| <input checked="" type="checkbox"/> | <a href="#">727</a> | 776.8319 | 1551.6492 |
| <input checked="" type="checkbox"/> | <a href="#">728</a> | 776.8325 | 1551.6504 |
| <input checked="" type="checkbox"/> | <a href="#">729</a> | 776.8341 | 1551.6536 |
| <input checked="" type="checkbox"/> | <a href="#">730</a> | 776.8350 | 1551.6554 |
| <input checked="" type="checkbox"/> | <a href="#">731</a> | 776.8358 | 1551.6570 |
| <input checked="" type="checkbox"/> | <a href="#">732</a> | 776.8389 | 1551.6632 |
| <input checked="" type="checkbox"/> | <a href="#">733</a> | 776.8391 | 1551.6636 |
| <input checked="" type="checkbox"/> | <a href="#">734</a> | 776.8400 | 1551.6654 |
| <input checked="" type="checkbox"/> | <a href="#">735</a> | 776.8446 | 1551.6746 |
| <input checked="" type="checkbox"/> | <a href="#">736</a> | 780.0881 | 1558.1616 |
| <input checked="" type="checkbox"/> | <a href="#">737</a> | 780.0950 | 1558.1754 |
| <input checked="" type="checkbox"/> | <a href="#">738</a> | 780.0955 | 1558.1764 |
| <input checked="" type="checkbox"/> | <a href="#">739</a> | 780.0988 | 1558.1830 |
| <input checked="" type="checkbox"/> | <a href="#">740</a> | 780.3696 | 1558.7246 |
| <input checked="" type="checkbox"/> | <a href="#">741</a> | 785.6671 | 1569.3196 |
| <input checked="" type="checkbox"/> | <a href="#">742</a> | 785.8365 | 1569.6584 |
| <input checked="" type="checkbox"/> | <a href="#">744</a> | 785.8393 | 1569.6640 |
| <input checked="" type="checkbox"/> | <a href="#">745</a> | 785.8394 | 1569.6642 |
| <input checked="" type="checkbox"/> | <a href="#">746</a> | 785.8405 | 1569.6664 |
| <input checked="" type="checkbox"/> | <a href="#">747</a> | 785.8409 | 1569.6672 |
| <input checked="" type="checkbox"/> | <a href="#">748</a> | 785.8411 | 1569.6676 |
| <input checked="" type="checkbox"/> | <a href="#">749</a> | 785.8415 | 1569.6684 |
| <input checked="" type="checkbox"/> | <a href="#">750</a> | 785.8415 | 1569.6684 |
| <input checked="" type="checkbox"/> | <a href="#">751</a> | 785.8418 | 1569.6690 |
| <input checked="" type="checkbox"/> | <a href="#">752</a> | 785.8422 | 1569.6698 |
| <input checked="" type="checkbox"/> | <a href="#">753</a> | 785.8427 | 1569.6708 |
| <input checked="" type="checkbox"/> | <a href="#">754</a> | 785.8434 | 1569.6722 |
| <input checked="" type="checkbox"/> | <a href="#">755</a> | 785.8435 | 1569.6724 |
| <input checked="" type="checkbox"/> | <a href="#">756</a> | 785.8438 | 1569.6730 |
| <input checked="" type="checkbox"/> | <a href="#">757</a> | 785.8438 | 1569.6730 |
| <input checked="" type="checkbox"/> | <a href="#">758</a> | 785.8439 | 1569.6732 |
| <input checked="" type="checkbox"/> | <a href="#">759</a> | 785.8442 | 1569.6738 |
| <input checked="" type="checkbox"/> | <a href="#">760</a> | 785.8443 | 1569.6740 |
| <input checked="" type="checkbox"/> | <a href="#">761</a> | 785.8443 | 1569.6740 |
| <input checked="" type="checkbox"/> | <a href="#">762</a> | 785.8445 | 1569.6744 |
| <input checked="" type="checkbox"/> | <a href="#">763</a> | 785.8446 | 1569.6746 |
| <input checked="" type="checkbox"/> | <a href="#">764</a> | 785.8452 | 1569.6758 |
| <input checked="" type="checkbox"/> | <a href="#">765</a> | 785.8453 | 1569.6760 |
| <input checked="" type="checkbox"/> | <a href="#">766</a> | 785.8463 | 1569.6780 |
| <input checked="" type="checkbox"/> | <a href="#">767</a> | 785.8466 | 1569.6786 |
| <input checked="" type="checkbox"/> | <a href="#">768</a> | 785.8469 | 1569.6792 |
| <input checked="" type="checkbox"/> | <a href="#">769</a> | 785.8472 | 1569.6798 |
| <input checked="" type="checkbox"/> | <a href="#">770</a> | 785.8482 | 1569.6818 |
| <input checked="" type="checkbox"/> | <a href="#">771</a> | 785.8499 | 1569.6852 |
| <input checked="" type="checkbox"/> | <a href="#">772</a> | 785.8504 | 1569.6862 |
| <input checked="" type="checkbox"/> | <a href="#">774</a> | 785.8514 | 1569.6882 |
| <input checked="" type="checkbox"/> | <a href="#">775</a> | 787.3445 | 1572.6744 |
| <input checked="" type="checkbox"/> | <a href="#">776</a> | 791.1782 | 1580.3418 |
| <input checked="" type="checkbox"/> | <a href="#">778</a> | 798.4543 | 1594.8940 |
| <input checked="" type="checkbox"/> | <a href="#">779</a> | 798.4565 | 1594.8984 |
| <input checked="" type="checkbox"/> | <a href="#">780</a> | 800.2484 | 1598.4822 |
| <input checked="" type="checkbox"/> | <a href="#">781</a> | 802.2179 | 1602.4212 |
| <input checked="" type="checkbox"/> | <a href="#">793</a> | 812.9390 | 1623.8634 |
| <input checked="" type="checkbox"/> | <a href="#">796</a> | 814.1793 | 1626.3440 |
| <input checked="" type="checkbox"/> | <a href="#">798</a> | 816.6277 | 1631.2408 |
| <input checked="" type="checkbox"/> | <a href="#">803</a> | 816.9065 | 1631.7984 |
| <input checked="" type="checkbox"/> | <a href="#">804</a> | 820.6395 | 1639.2644 |
| <input checked="" type="checkbox"/> | <a href="#">805</a> | 820.6462 | 1639.2778 |
| <input checked="" type="checkbox"/> | <a href="#">806</a> | 820.8856 | 1639.7566 |
| <input checked="" type="checkbox"/> | <a href="#">813</a> | 840.0740 | 1678.1334 |
| <input checked="" type="checkbox"/> | <a href="#">814</a> | 842.7434 | 1683.4722 |
| <input checked="" type="checkbox"/> | <a href="#">815</a> | 844.2412 | 1686.4678 |
| <input checked="" type="checkbox"/> | <a href="#">818</a> | 848.4417 | 1694.8688 |
| <input checked="" type="checkbox"/> | <a href="#">821</a> | 850.9721 | 1699.9296 |
| <input checked="" type="checkbox"/> | <a href="#">824</a> | 851.4576 | 1700.9006 |
| <input checked="" type="checkbox"/> | <a href="#">825</a> | 851.4578 | 1700.9010 |
| <input checked="" type="checkbox"/> | <a href="#">826</a> | 851.4581 | 1700.9016 |
| <input checked="" type="checkbox"/> | <a href="#">827</a> | 851.4586 | 1700.9026 |
| <input checked="" type="checkbox"/> | <a href="#">828</a> | 852.9587 | 1703.9028 |
| <input checked="" type="checkbox"/> | <a href="#">834</a> | 861.8549 | 1721.6952 |
| <input checked="" type="checkbox"/> | <a href="#">837</a> | 874.0439 | 1746.0732 |
| <input checked="" type="checkbox"/> | <a href="#">838</a> | 874.5388 | 1747.0630 |
| <input checked="" type="checkbox"/> | <a href="#">839</a> | 878.0348 | 1754.0550 |
| <input checked="" type="checkbox"/> | <a href="#">843</a> | 885.9266 | 1769.8386 |
| <input checked="" type="checkbox"/> | <a href="#">844</a> | 889.1068 | 1776.1990 |
| <input checked="" type="checkbox"/> | <a href="#">845</a> | 889.7362 | 1777.4578 |
| <input checked="" type="checkbox"/> | <a href="#">847</a> | 895.3176 | 1782.9310 |
| <input checked="" type="checkbox"/> | <a href="#">848</a> | 895.6211 | 1789.2276 |

|                                     |                     |           |           |
|-------------------------------------|---------------------|-----------|-----------|
| <input checked="" type="checkbox"/> | <a href="#">851</a> | 897.9429  | 1793.8712 |
| <input checked="" type="checkbox"/> | <a href="#">852</a> | 899.5272  | 1797.0398 |
| <input checked="" type="checkbox"/> | <a href="#">853</a> | 902.4464  | 1802.8782 |
| <input checked="" type="checkbox"/> | <a href="#">855</a> | 1809.2770 | 1808.2697 |
| <input checked="" type="checkbox"/> | <a href="#">856</a> | 1810.1915 | 1809.1842 |
| <input checked="" type="checkbox"/> | <a href="#">860</a> | 921.1354  | 1840.2562 |
| <input checked="" type="checkbox"/> | <a href="#">861</a> | 1844.5225 | 1843.5152 |
| <input checked="" type="checkbox"/> | <a href="#">862</a> | 924.6959  | 1847.3772 |
| <input checked="" type="checkbox"/> | <a href="#">863</a> | 1850.4302 | 1849.4229 |
| <input checked="" type="checkbox"/> | <a href="#">864</a> | 928.0735  | 1854.1324 |
| <input checked="" type="checkbox"/> | <a href="#">865</a> | 934.9470  | 1867.8794 |
| <input checked="" type="checkbox"/> | <a href="#">866</a> | 1875.9568 | 1874.9495 |
| <input checked="" type="checkbox"/> | <a href="#">867</a> | 1881.9951 | 1880.9878 |
| <input checked="" type="checkbox"/> | <a href="#">868</a> | 1883.1820 | 1882.1747 |
| <input checked="" type="checkbox"/> | <a href="#">869</a> | 942.1296  | 1882.2446 |
| <input checked="" type="checkbox"/> | <a href="#">870</a> | 1886.2216 | 1885.2143 |
| <input checked="" type="checkbox"/> | <a href="#">872</a> | 956.1188  | 1910.2230 |
| <input checked="" type="checkbox"/> | <a href="#">875</a> | 978.5511  | 1955.0876 |
| <input checked="" type="checkbox"/> | <a href="#">880</a> | 1962.2844 | 1961.2771 |
| <input checked="" type="checkbox"/> | <a href="#">882</a> | 1039.9951 | 2077.9756 |
| <input checked="" type="checkbox"/> | <a href="#">884</a> | 1048.4742 | 2094.9338 |
| <input checked="" type="checkbox"/> | <a href="#">885</a> | 1048.9790 | 2095.9434 |
| <input checked="" type="checkbox"/> | <a href="#">886</a> | 1048.9817 | 2095.9488 |
| <input checked="" type="checkbox"/> | <a href="#">888</a> | 699.7144  | 2096.1214 |
| <input checked="" type="checkbox"/> | <a href="#">889</a> | 1056.4691 | 2110.9236 |
| <input checked="" type="checkbox"/> | <a href="#">892</a> | 1064.9711 | 2127.9276 |
| <input checked="" type="checkbox"/> | <a href="#">893</a> | 1072.9751 | 2143.9356 |
| <input checked="" type="checkbox"/> | <a href="#">894</a> | 1072.9877 | 2143.9608 |
| <input checked="" type="checkbox"/> | <a href="#">895</a> | 737.0175  | 2208.0307 |
| <input checked="" type="checkbox"/> | <a href="#">899</a> | 1111.1013 | 2220.1880 |
| <input checked="" type="checkbox"/> | <a href="#">900</a> | 1131.2676 | 2260.5206 |
| <input checked="" type="checkbox"/> | <a href="#">901</a> | 761.3976  | 2281.1710 |
| <input checked="" type="checkbox"/> | <a href="#">902</a> | 761.7251  | 2282.1535 |
| <input checked="" type="checkbox"/> | <a href="#">904</a> | 768.6889  | 2303.0449 |
| <input checked="" type="checkbox"/> | <a href="#">913</a> | 800.0605  | 2397.1597 |
| <input checked="" type="checkbox"/> | <a href="#">925</a> | 860.3876  | 2578.1410 |
| <input checked="" type="checkbox"/> | <a href="#">926</a> | 880.1218  | 2637.3436 |
| <input checked="" type="checkbox"/> | <a href="#">932</a> | 893.7734  | 2678.2984 |
| <input checked="" type="checkbox"/> | <a href="#">933</a> | 894.0991  | 2679.2755 |
| <input checked="" type="checkbox"/> | <a href="#">935</a> | 927.7458  | 2780.2156 |
| <input checked="" type="checkbox"/> | <a href="#">940</a> | 933.7698  | 2798.2876 |
| <input checked="" type="checkbox"/> | <a href="#">946</a> | 961.0908  | 2880.2506 |
| <input checked="" type="checkbox"/> | <a href="#">948</a> | 961.7506  | 2882.2300 |
| <input checked="" type="checkbox"/> | <a href="#">949</a> | 972.4224  | 2914.2454 |
| <input checked="" type="checkbox"/> | <a href="#">950</a> | 978.5491  | 2932.6255 |
| <input checked="" type="checkbox"/> | <a href="#">956</a> | 820.6473  | 3278.5601 |
| <input checked="" type="checkbox"/> | <a href="#">958</a> | 1130.5444 | 3388.6114 |
| <input checked="" type="checkbox"/> | <a href="#">959</a> | 1130.5486 | 3388.6240 |
| <input checked="" type="checkbox"/> | <a href="#">961</a> | 1493.0217 | 4476.0433 |

### Search Parameters

Type of search : MS/MS Ion Search  
Enzyme : Trypsin  
Fixed modifications : Carbamidomethyl (C)  
Variable modifications : Oxidation (M)  
Mass values : Monoisotopic  
Protein Mass : Unrestricted  
Peptide Mass Tolerance :  $\pm 50$  ppm  
Fragment Mass Tolerance :  $\pm 0.2$  Da  
Max Missed Cleavages : 1  
Instrument type : ESI-QUAD-TOF  
Number of queries : 961

Mascot: <http://www.matrixscience.com/>



# Mascot Search Results

User : Dominic  
 Email : dominic.kurian@bbsrc.ac.uk  
 Search title : IPI Mouse\_15-02-2010  
 MS data file : C:\Program Files\Matrix Science\Mascot Daemon\mgf\31 MSadmin\mascot\_daemon\_merge.mgf  
 Database : IPI\_mouse MOUSE\_v3\_79 (54943 sequences; 24917557 residues)  
 Timestamp : 15 Feb 2011 at 11:16:52 GMT  
 Enzyme : Trypsin  
 Fixed modifications : Carbamidomethyl (C)  
 Variable modifications : Oxidation (M)  
 Mass values : Monoisotopic  
 Protein Mass : Unrestricted  
 Peptide Mass Tolerance : ± 50 ppm  
 Fragment Mass Tolerance : ± 0.2 Da  
 Max Missed Cleavages : 1  
 Instrument type : ESI-QUAD-TOF  
 Number of queries : 1043  
 Protein hits :

- [IPI00420725](#) Tax\_Id=10090 Gene\_Symbol=Camk2a Uncharacterized protein
- [IPI00474502](#) Tax\_Id=10090 Gene\_Symbol=Camk2b Calcium/calmodulin-dependent protein kinase type II subunit beta
- [IPI00473320](#) Tax\_Id=10090 Gene\_Symbol=Actb Putative uncharacterized protein
- [IPI00136929](#) Tax\_Id=10090 Gene\_Symbol=Actg1 Gamma actin-like protein
- [IPI00112584](#) Tax\_Id=10090 Gene\_Symbol=Camk2d Isoform 1 of Calcium/calmodulin-dependent protein kinase type II
- [IPI00124695](#) Tax\_Id=10090 Gene\_Symbol=Camk2g Isoform 1 of Calcium/calmodulin-dependent protein kinase type II
- [IPI00221528](#) Tax\_Id=10090 Gene\_Symbol=Actb12 Beta-actin-like protein 2
- [IPI00169463](#) Tax\_Id=10090 Gene\_Symbol=Tubb2c Tubulin beta-2C chain
- [IPI00109073](#) Tax\_Id=10090 Gene\_Symbol=Tubb4 Tubulin beta-4 chain
- [IPI00109061](#) Tax\_Id=10090 Gene\_Symbol=Tubb2b Tubulin beta-2B chain
- [IPI00136703](#) Tax\_Id=10090 Gene\_Symbol=Ckb Creatine kinase B-type
- [IPI00420569](#) Tax\_Id=10090 Gene\_Symbol=Atpla2 Sodium/potassium-transporting ATPase subunit alpha-2
- [IPI00122048](#) Tax\_Id=10090 Gene\_Symbol=Atpla3 Sodium/potassium-transporting ATPase subunit alpha-3
- [IPI00117352](#) Tax\_Id=10090 Gene\_Symbol=Tubb5 Tubulin beta-5 chain
- [IPI00115546](#) Tax\_Id=10090 Gene\_Symbol=Gnao1 Isoform Alpha-2 of Guanine nucleotide-binding protein G(o) subunit
- [IPI00110753](#) Tax\_Id=10090 Gene\_Symbol=Tubal1 Tubulin alpha-1A chain
- [IPI00120793](#) Tax\_Id=10090 Gene\_Symbol=Prnp Major prion protein
- [IPI00112251](#) Tax\_Id=10090 Gene\_Symbol=Tubb3 Tubulin beta-3 chain
- [IPI00122928](#) Tax\_Id=10090 Gene\_Symbol=Tubb6 Tubulin beta-6 chain
- [IPI00135284](#) Tax\_Id=10090 Gene\_Symbol=Gml6374 Glyceraldehyde-3-phosphate dehydrogenase
- [IPI00135106](#) Tax\_Id=10090 Gene\_Symbol=Mobp Isoform 1 of Myelin-associated oligodendrocyte basic protein
- [IPI00114375](#) Tax\_Id=10090 Gene\_Symbol=Dpys12 Dihydropyrimidinase-related protein 2
- [IPI00132042](#) Tax\_Id=10090 Gene\_Symbol=Pdhb Pyruvate dehydrogenase E1 component subunit beta, mitochondrial
- [IPI00138892](#) Tax\_Id=10090 Gene\_Symbol=Uba52 Ubiquitin-60S ribosomal protein L40
- [IPI00121038](#) Tax\_Id=10090 Gene\_Symbol=Vcan Isoform V0 of Versican core protein
- [IPI00323571](#) Tax\_Id=10090 Gene\_Symbol=ApoE Apolipoprotein E
- [IPI00229525](#) Tax\_Id=10090 Gene\_Symbol=Gnal Guanine nucleotide-binding protein G(olf) subunit alpha
- [IPI00118569](#) Tax\_Id=10090 Gene\_Symbol=Gnal3 Guanine nucleotide-binding protein subunit alpha-13
- [IPI00129240](#) Tax\_Id=10090 Gene\_Symbol=Vtn Vitronectin
- [IPI00323357](#) Tax\_Id=10090 Gene\_Symbol=Hspa8 Heat shock cognate 71 kDa protein
- [IPI00131366](#) Tax\_Id=10090 Gene\_Symbol=Krt6b Keratin, type II cytoskeletal 6B
- [IPI00134344](#) Tax\_Id=10090 Gene\_Symbol=Spn3 Putative uncharacterized protein
- [IPI00123313](#) Tax\_Id=10090 Gene\_Symbol=Uba1 Ubiquitin-like modifier-activating enzyme 1
- [IPI00113112](#) Tax\_Id=10090 Gene\_Symbol=Rab3b Ras-related protein Rab-3B
- [IPI00116697](#) Tax\_Id=10090 Gene\_Symbol=Rab6 Isoform 1 of Ras-related protein Rab-6A
- [IPI00136271](#) Tax\_Id=10090 Gene\_Symbol=Rab33b Putative uncharacterized protein
- [IPI00170032](#) Tax\_Id=10090 Gene\_Symbol=Rab15 Ras-related protein Rab-15
- [IPI00656325](#) Tax\_Id=10090 Gene\_Symbol=Nsf Vesicle-fusing ATPase

## IPI\_mouse [Decoy](#) False discovery rate

|                                                      |     |   |        |
|------------------------------------------------------|-----|---|--------|
| Peptide matches above identity threshold             | 123 | 0 | 0.00 % |
| Peptide matches above homology or identity threshold | 143 | 2 | 1.40 % |

## Select Summary Report

Format As

 Select Summary (protein hits)

[Help](#)
Significance threshold  $p < 0.01$ 

Max. number of hits AUTO

Standard scoring  MudPIT scoring  Ions score or expect cut-off 0

Show sub-sets 0

Show pop-ups  Suppress pop-ups  Sort unassigned

Decreasing Score

Require bold red 

1. [IPI00420725](#) Mass: 55882 Score: 883 Queries matched: 42 emPAI: 1.23

| Query               | Observed  | Mr (expt) | Mr (calc) | ppm    | Miss | Score | Expect   | Rank | Peptide                                                                                                             |
|---------------------|-----------|-----------|-----------|--------|------|-------|----------|------|---------------------------------------------------------------------------------------------------------------------|
| <a href="#">245</a> | 432.7284  | 863.4422  | 863.4501  | -9.12  | 0    | 17    | 2.1      | 1    | R.SGAPSVLPH.-                                                                                                       |
| <a href="#">261</a> | 446.2625  | 890.5104  | 890.5086  | 2.03   | 1    | 4     | (43)     | 22   | K.GAFSVVRR.C                                                                                                        |
| <a href="#">283</a> | 463.2463  | 924.4780  | 924.4777  | 0.37   | 1    | 25    | 0.2      | 1    | R.DHQKLER.E <a href="#">282</a> <a href="#">284</a>                                                                 |
| <a href="#">373</a> | 525.2643  | 1048.5140 | 1048.5553 | -39.33 | 0    | 53    | 0.00048  | 1    | K.VLAGQEYAAK.I <a href="#">374</a>                                                                                  |
| <a href="#">384</a> | 530.3027  | 1058.5908 | 1058.5906 | 0.21   | 1    | (43)  | 0.0034   | 1    | K.MLTINPSKR.I <a href="#">383</a> <a href="#">385</a>                                                               |
| <a href="#">398</a> | 538.2980  | 1074.5814 | 1074.5855 | -3.81  | 1    | 52    | 0.00054  | 1    | K.MLTINPSKR.I <a href="#">399</a> <a href="#">400</a> <a href="#">401</a>                                           |
| <a href="#">424</a> | 545.3502  | 1088.6858 | 1088.6818 | 3.70   | 1    | 37    | 0.003    | 1    | R.LLKHPNIVR.L                                                                                                       |
| <a href="#">480</a> | 574.3285  | 1146.6424 | 1146.6431 | -0.54  | 0    | 64    | 2.5e-005 | 1    | K.GAILTTMLATR.N                                                                                                     |
| <a href="#">497</a> | 582.3258  | 1162.6370 | 1162.6380 | -0.81  | 0    | (59)  | 8.6e-005 | 1    | K.GAILTTMLATR.N <a href="#">498</a>                                                                                 |
| <a href="#">586</a> | 631.3029  | 1260.5912 | 1260.5927 | -1.19  | 0    | 58    | 0.0001   | 1    | R.FYFENLWSR.N <a href="#">585</a> <a href="#">587</a>                                                               |
| <a href="#">628</a> | 652.3355  | 1302.6564 | 1302.6932 | -28.21 | 0    | 73    | 4.2e-006 | 1    | R.ITQYLDAGGIPR.T <a href="#">629</a> <a href="#">630</a> <a href="#">632</a>                                        |
| <a href="#">669</a> | 670.8956  | 1339.7766 | 1339.7711 | 4.16   | 0    | 74    | 1.2e-006 | 1    | R.DLKPENLLASK.L <a href="#">664</a> <a href="#">665</a> <a href="#">666</a> <a href="#">667</a> <a href="#">668</a> |
| <a href="#">836</a> | 816.8978  | 1631.7810 | 1631.7719 | 5.62   | 0    | 68    | 1.1e-005 | 1    | R.FTEEYQLFEEELGK.G <a href="#">832</a> <a href="#">835</a>                                                          |
| <a href="#">937</a> | 1040.9652 | 2079.9158 | 2079.9426 | -12.84 | 0    | 77    | 6.5e-007 | 1    | K.AGAYDFPSPEWDTVTPKAK.D <a href="#">936</a>                                                                         |
| <a href="#">983</a> | 783.7271  | 2348.1595 | 2348.1689 | -4.00  | 1    | 78    | 7.4e-007 | 1    | R.FTEEYQLFEEELGKGFASVVR.R <a href="#">982</a> <a href="#">984</a>                                                   |

[1005](#) [888.7645](#) [2663.2717](#) [2663.2755](#) [-1.44](#) [1](#) [101](#) [3.3e-009](#) [1](#) [K.AGAYDFPSPEDWTVTPEAKDLINK.M](#) [1004](#) [1006](#)

**Proteins matching the same set of peptides:**

[IPI00621806](#) **Mass:** 54651 **Score:** 883 **Queries matched:** 42

Tax\_Id=10090 Gene\_Symbol=Camk2a Isoform Alpha CaMKII of Calcium/calmodulin-dependent protein kinase type II subunit alpha

2. [IPI00474502](#) **Mass:** 61164 **Score:** 771 **Queries matched:** 36 **emPAI:** 1.57  
Tax\_Id=10090 Gene\_Symbol=Camk2b Calcium/calmodulin-dependent protein kinase type II subunit beta

| Query               | Observed  | Mr(expt)  | Mr(calc)  | ppm    | Miss | Score | Expect   | Rank | Peptide                                                                                                             |
|---------------------|-----------|-----------|-----------|--------|------|-------|----------|------|---------------------------------------------------------------------------------------------------------------------|
| <a href="#">261</a> | 446.2625  | 890.5104  | 890.5086  | 2.03   | 1    | 4     | 22       | 2    | K.GAFSVVRR.C                                                                                                        |
| <a href="#">283</a> | 463.2463  | 924.4780  | 924.4777  | 0.37   | 1    | 25    | 0.2      | 1    | R.DHQKLER.E <a href="#">282</a> <a href="#">284</a>                                                                 |
| <a href="#">376</a> | 526.2389  | 1050.4632 | 1050.4586 | 4.38   | 0    | 21    | 0.3      | 1    | R.STVASMMHR.Q                                                                                                       |
| <a href="#">477</a> | 572.8038  | 1143.5930 | 1143.5964 | -2.95  | 0    | 15    | 2.9      | 1    | R.FYFENLLAK.N <a href="#">478</a>                                                                                   |
| <a href="#">480</a> | 574.3285  | 1146.6424 | 1146.6431 | -0.54  | 0    | 64    | 2.5e-005 | 1    | K.GAILTTMLATR.N                                                                                                     |
| <a href="#">497</a> | 582.3258  | 1162.6370 | 1162.6380 | -0.81  | 0    | (59)  | 8.6e-005 | 1    | K.GAILTTMLATR.N <a href="#">498</a>                                                                                 |
| <a href="#">573</a> | 623.3220  | 1244.6294 | 1244.6361 | -5.33  | 0    | 43    | 0.0047   | 1    | K.ADGVKPKQTNSTK.N                                                                                                   |
| <a href="#">669</a> | 670.8956  | 1339.7766 | 1339.7711 | 4.16   | 0    | 74    | 1.2e-006 | 1    | R.DLKPENLLASK.C <a href="#">664</a> <a href="#">665</a> <a href="#">666</a> <a href="#">667</a> <a href="#">668</a> |
| <a href="#">692</a> | 458.5797  | 1372.7173 | 1372.7310 | -10.02 | 1    | 24    | 0.27     | 1    | K.KADGVKPKQTNSTK.N                                                                                                  |
| <a href="#">712</a> | 702.3754  | 1402.7362 | 1402.7317 | 3.24   | 0    | 60    | 6.5e-005 | 1    | R.LTYQIDGGQRP.R <a href="#">711</a> <a href="#">713</a>                                                             |
| <a href="#">821</a> | 810.8781  | 1619.7416 | 1619.7355 | 3.79   | 0    | 80    | 5.2e-007 | 1    | R.FTDEYQLYEDIGK.G                                                                                                   |
| <a href="#">827</a> | 542.6376  | 1624.8910 | 1624.9082 | -10.63 | 1    | 72    | 2.8e-006 | 1    | K.NLINQMLTINPAKR.I <a href="#">826</a>                                                                              |
| <a href="#">937</a> | 1040.9652 | 2079.9158 | 2079.9426 | -12.84 | 0    | 77    | 6.5e-007 | 1    | K.AGAYDFPSPEDWTVTPEAK.N <a href="#">936</a>                                                                         |
| <a href="#">945</a> | 1057.0130 | 2112.0114 | 2112.0011 | 4.90   | 0    | 90    | 5e-008   | 1    | K.TTEQLIEAVNNGDFEAYAK.I <a href="#">942</a> <a href="#">944</a>                                                     |
| <a href="#">981</a> | 779.7127  | 2336.1163 | 2336.1325 | -6.94  | 1    | 98    | 6.8e-009 | 1    | R.FTDEYQLYEDIGKGFVSVR.R <a href="#">979</a> <a href="#">980</a>                                                     |
| <a href="#">988</a> | 1177.0770 | 2352.1394 | 2352.1301 | 3.97   | 0    | 92    | 2.6e-008 | 1    | R.QTTAPATMSTAASGTTMGLVEQAK.S <a href="#">986</a>                                                                    |
| <a href="#">989</a> | 785.4238  | 2353.2496 | 2353.2642 | -6.20  | 0    | 61    | 2.7e-005 | 1    | K.GSLPPAALPQTTVIHNPVDGK.E                                                                                           |
| <a href="#">991</a> | 1185.0753 | 2368.1360 | 2368.1250 | 4.65   | 0    | (66)  | 1.1e-005 | 1    | R.QTTAPATMSTAASGTTMGLVEQAK.S                                                                                        |

**Proteins matching the same set of peptides:**

[IPI00649778](#) **Mass:** 73827 **Score:** 771 **Queries matched:** 36

Tax\_Id=10090 Gene\_Symbol=Camk2b Calcium/calmodulin-dependent protein kinase II, beta, isoform CRA\_b

[IPI00875723](#) **Mass:** 68686 **Score:** 771 **Queries matched:** 36

Tax\_Id=10090 Gene\_Symbol=Camk2b 68 kDa protein

3. [IPI00473320](#) **Mass:** 42115 **Score:** 665 **Queries matched:** 20 **emPAI:** 1.13  
Tax\_Id=10090 Gene\_Symbol=Actb Putative uncharacterized protein

| Query                | Observed  | Mr(expt)  | Mr(calc)  | ppm   | Miss | Score | Expect   | Rank | Peptide                                                                                           |
|----------------------|-----------|-----------|-----------|-------|------|-------|----------|------|---------------------------------------------------------------------------------------------------|
| <a href="#">94</a>   | 630.2972  | 629.2899  | 629.2769  | 20.7  | 0    | 21    | 0.16     | 1    | R.GDDAPR.A                                                                                        |
| <a href="#">494</a>  | 581.3107  | 1160.6068 | 1160.6111 | -3.65 | 0    | 23    | 0.45     | 1    | K.EITALAPSTMK.I                                                                                   |
| <a href="#">530</a>  | 599.8568  | 1197.6990 | 1197.6982 | 0.69  | 0    | 51    | 0.00032  | 1    | R.AVFPSIVGRPR.H <a href="#">531</a>                                                               |
| <a href="#">676</a>  | 677.8154  | 1353.6162 | 1353.6161 | 0.14  | 1    | 80    | 5.7e-007 | 1    | K.DSYVGDEAQSRR.G                                                                                  |
| <a href="#">757</a>  | 774.9159  | 1547.8172 | 1547.8051 | 7.85  | 1    | 93    | 3.4e-008 | 1    | R.MQKEITAPALSTMK.I <a href="#">755</a> <a href="#">756</a>                                        |
| <a href="#">824</a>  | 812.4301  | 1622.8456 | 1622.8338 | 7.32  | 1    | 16    | 1.3      | 1    | R.LDLAGRDLTDYLMK.I                                                                                |
| <a href="#">885</a>  | 895.9537  | 1789.8928 | 1789.8846 | 4.59  | 0    | 103   | 3.1e-009 | 1    | K.SYELPDGQVITIGNER.F <a href="#">886</a>                                                          |
| <a href="#">918</a>  | 652.0211  | 1953.0415 | 1953.0571 | -8.00 | 0    | 73    | 2e-006   | 1    | R.VAPEEHPVLLTEAPLNPK.A <a href="#">917</a> <a href="#">919</a>                                    |
| <a href="#">966</a>  | 1108.0448 | 2214.0750 | 2214.0627 | 5.58  | 0    | 71    | 3.7e-006 | 1    | K.DLYANTVLSGGTTPYGLADR.M                                                                          |
| <a href="#">1038</a> | 1061.8691 | 3182.5855 | 3182.6071 | -6.78 | 0    | 109   | 3.5e-010 | 1    | R.TTGIVMDSGDGVTHTVPIYEGYALPHAILR.L <a href="#">1035</a> <a href="#">1036</a> <a href="#">1037</a> |
| <a href="#">1039</a> | 800.6558  | 3198.5941 | 3198.6020 | -2.46 | 0    | (84)  | 1.2e-007 | 1    | R.TTGIVMDSGDGVTHTVPIYEGYALPHAILR.L                                                                |

4. [IPI00136929](#) **Mass:** 44029 **Score:** 627 **Queries matched:** 17 **emPAI:** 0.92  
Tax\_Id=10090 Gene\_Symbol=Actg1 Gamma actin-like protein

| Query                | Observed  | Mr(expt)  | Mr(calc)  | ppm   | Miss | Score | Expect   | Rank | Peptide                                                                                           |
|----------------------|-----------|-----------|-----------|-------|------|-------|----------|------|---------------------------------------------------------------------------------------------------|
| <a href="#">494</a>  | 581.3107  | 1160.6068 | 1160.6111 | -3.65 | 0    | 23    | 0.45     | 1    | K.EITALAPSTMK.I                                                                                   |
| <a href="#">676</a>  | 677.8154  | 1353.6162 | 1353.6161 | 0.14  | 1    | 80    | 5.7e-007 | 1    | K.DSYVGDEAQSRR.G                                                                                  |
| <a href="#">757</a>  | 774.9159  | 1547.8172 | 1547.8051 | 7.85  | 1    | 93    | 3.4e-008 | 1    | R.MQKEITAPALSTMK.I <a href="#">755</a> <a href="#">756</a>                                        |
| <a href="#">824</a>  | 812.4301  | 1622.8456 | 1622.8338 | 7.32  | 1    | 16    | 1.3      | 1    | R.LDLAGRDLTDYLMK.I                                                                                |
| <a href="#">885</a>  | 895.9537  | 1789.8928 | 1789.8846 | 4.59  | 0    | 103   | 3.1e-009 | 1    | K.SYELPDGQVITIGNER.F <a href="#">886</a>                                                          |
| <a href="#">918</a>  | 652.0211  | 1953.0415 | 1953.0571 | -8.00 | 0    | 73    | 2e-006   | 1    | R.VAPEEHPVLLTEAPLNPK.R <a href="#">917</a> <a href="#">919</a>                                    |
| <a href="#">966</a>  | 1108.0448 | 2214.0750 | 2214.0627 | 5.58  | 0    | 71    | 3.7e-006 | 1    | K.DLYANTVLSGGTTPYGLADR.M                                                                          |
| <a href="#">1038</a> | 1061.8691 | 3182.5855 | 3182.6071 | -6.78 | 0    | 109   | 3.5e-010 | 1    | R.TTGIVMDSGDGVTHTVPIYEGYALPHAILR.L <a href="#">1035</a> <a href="#">1036</a> <a href="#">1037</a> |
| <a href="#">1039</a> | 800.6558  | 3198.5941 | 3198.6020 | -2.46 | 0    | (84)  | 1.2e-007 | 1    | R.TTGIVMDSGDGVTHTVPIYEGYALPHAILR.L                                                                |

5. [IPI00112584](#) **Mass:** 56961 **Score:** 456 **Queries matched:** 24 **emPAI:** 0.66  
Tax\_Id=10090 Gene\_Symbol=Camk2d Isoform 1 of Calcium/calmodulin-dependent protein kinase type II subunit delta

| Query                | Observed  | Mr(expt)  | Mr(calc)  | ppm    | Miss | Score | Expect   | Rank | Peptide                                                                                                             |
|----------------------|-----------|-----------|-----------|--------|------|-------|----------|------|---------------------------------------------------------------------------------------------------------------------|
| <a href="#">261</a>  | 446.2625  | 890.5104  | 890.5086  | 2.03   | 1    | 4     | 22       | 2    | K.GAFSVVRR.C                                                                                                        |
| <a href="#">283</a>  | 463.2463  | 924.4780  | 924.4777  | 0.37   | 1    | 25    | 0.2      | 1    | R.DHQKLER.E <a href="#">282</a> <a href="#">284</a>                                                                 |
| <a href="#">376</a>  | 526.2389  | 1050.4632 | 1050.4586 | 4.38   | 0    | 21    | 0.3      | 1    | R.STVASMMHR.Q                                                                                                       |
| <a href="#">383</a>  | 530.2958  | 1058.5770 | 1058.5906 | -12.82 | 1    | 20    | 0.97     | 2    | K.MLTINPAKR.I                                                                                                       |
| <a href="#">424</a>  | 545.3502  | 1088.6858 | 1088.6818 | 3.70   | 1    | 37    | 0.003    | 1    | R.LLKHNPVLR.L                                                                                                       |
| <a href="#">460</a>  | 559.7792  | 1117.5438 | 1117.5444 | -0.48  | 0    | 13    | 4.2      | 1    | R.FYFENLLAK.S                                                                                                       |
| <a href="#">480</a>  | 574.3285  | 1146.6424 | 1146.6431 | -0.54  | 0    | 64    | 2.5e-005 | 1    | K.GAILTTMLATR.N                                                                                                     |
| <a href="#">497</a>  | 582.3258  | 1162.6370 | 1162.6380 | -0.81  | 0    | (59)  | 8.6e-005 | 1    | K.GAILTTMLATR.N <a href="#">498</a>                                                                                 |
| <a href="#">669</a>  | 670.8956  | 1339.7766 | 1339.7711 | 4.16   | 0    | 74    | 1.2e-006 | 1    | R.DLKPENLLASK.C <a href="#">664</a> <a href="#">665</a> <a href="#">666</a> <a href="#">667</a> <a href="#">668</a> |
| <a href="#">679</a>  | 680.3028  | 1358.5910 | 1358.5846 | 4.72   | 0    | 20    | 0.3      | 1    | R.LTYQIDGGQRP.R                                                                                                     |
| <a href="#">819</a>  | 809.8877  | 1617.7608 | 1617.7562 | 2.85   | 0    | 59    | 6.8e-005 | 1    | R.FTDEYQLFELGK.G                                                                                                    |
| <a href="#">937</a>  | 1040.9652 | 2079.9158 | 2079.9426 | -12.84 | 0    | 77    | 6.5e-007 | 1    | K.AGAYDFPSPEDWTVTPEAK.D <a href="#">936</a>                                                                         |
| <a href="#">1005</a> | 888.7645  | 2663.2717 | 2663.2755 | -1.44  | 1    | 101   | 3.3e-009 | 1    | K.AGAYDFPSPEDWTVTPEAKDLINK.M <a href="#">1004</a> <a href="#">1006</a>                                              |

**Proteins matching the same set of peptides:**

[IPI00406790](#) **Mass:** 60593 **Score:** 456 **Queries matched:** 24

Tax\_Id=10090 Gene\_Symbol=Camk2d Isoform 4 of Calcium/calmodulin-dependent protein kinase type II subunit delta

[IPI00475044](#) **Mass:** 55899 **Score:** 456 **Queries matched:** 24

Tax\_Id=10090 Gene\_Symbol=Camk2d Isoform 2 of Calcium/calmodulin-dependent protein kinase type II subunit delta

[IPI00828919](#) **Mass:** 58492 **Score:** 456 **Queries matched:** 24

Tax\_Id=10090 Gene\_Symbol=Camk2d Isoform 3 of Calcium/calmodulin-dependent protein kinase type II subunit delta

[IPI00857865](#) Mass: 54664 Score: 456 Queries matched: 24  
 Tax\_Id=10090 Gene\_Symbol=Camk2d Putative uncharacterized protein  
[IPI00858128](#) Mass: 58283 Score: 456 Queries matched: 24  
 Tax\_Id=10090 Gene\_Symbol=Camk2d calcium/calmodulin-dependent protein kinase type II subunit delta isoform 1  
[IPI00858144](#) Mass: 55828 Score: 456 Queries matched: 24  
 Tax\_Id=10090 Gene\_Symbol=Camk2d 55 kDa protein

6. [IPI00124695](#) Mass: 60254 Score: 420 Queries matched: 21 emPAI: 0.79  
 Tax\_Id=10090 Gene\_Symbol=Camk2g Isoform 1 of Calcium/calmodulin-dependent protein kinase type II subunit gamma

| Query               | Observed  | Mr(expt)  | Mr(calc)  | ppm    | Miss | Score | Expect   | Rank | Peptide                                                                                                             |
|---------------------|-----------|-----------|-----------|--------|------|-------|----------|------|---------------------------------------------------------------------------------------------------------------------|
| <a href="#">261</a> | 446.2625  | 890.5104  | 890.5086  | 2.03   | 1    | 4     | 22       | 2    | K.GAFSVVRR.C                                                                                                        |
| <a href="#">283</a> | 463.2463  | 924.4780  | 924.4777  | 0.37   | 1    | 25    | 0.2      | 1    | R.DHVKLER.E <a href="#">282</a> <a href="#">284</a>                                                                 |
| <a href="#">376</a> | 526.2389  | 1050.4632 | 1050.4586 | 4.38   | 0    | 21    | 0.3      | 1    | R.STVASMHR.Q                                                                                                        |
| <a href="#">424</a> | 545.3502  | 1088.6858 | 1088.6818 | 3.70   | 1    | 37    | 0.003    | 1    | R.LLKHPNIVR.L                                                                                                       |
| <a href="#">669</a> | 670.8956  | 1339.7766 | 1339.7711 | 4.16   | 0    | 74    | 1.2e-006 | 1    | R.DLKPENLLASK.C <a href="#">664</a> <a href="#">665</a> <a href="#">666</a> <a href="#">667</a> <a href="#">668</a> |
| <a href="#">712</a> | 702.3754  | 1402.7362 | 1402.7317 | 3.24   | 0    | 60    | 6.5e-005 | 1    | R.LTQYIDGQGRPR.T <a href="#">711</a> <a href="#">713</a>                                                            |
| <a href="#">811</a> | 802.8796  | 1603.7446 | 1603.7406 | 2.52   | 0    | 77    | 1e-006   | 1    | R.FTDDYQLFEELGK.G                                                                                                   |
| <a href="#">827</a> | 542.6376  | 1624.8910 | 1624.9082 | -10.63 | 1    | 72    | 2.8e-006 | 1    | K.NLINQMLTINPAKR.I <a href="#">826</a>                                                                              |
| <a href="#">937</a> | 1040.9652 | 2079.9158 | 2079.9426 | -12.84 | 0    | 77    | 6.5e-007 | 1    | K.AGAYDFPSPEDWTVTPEAK.N <a href="#">936</a>                                                                         |
| <a href="#">978</a> | 774.3764  | 2320.1074 | 2320.1376 | -13.02 | 1    | 53    | 0.00023  | 1    | R.FTDDYQLFEELGKGFVSVR.R                                                                                             |

## Proteins matching the same set of peptides:

[IPI00228044](#) Mass: 59013 Score: 420 Queries matched: 21  
 Tax\_Id=10090 Gene\_Symbol=Camk2g Isoform 2 of Calcium/calmodulin-dependent protein kinase type II subunit gamma  
[IPI00228045](#) Mass: 56610 Score: 420 Queries matched: 21  
 Tax\_Id=10090 Gene\_Symbol=Camk2g Isoform 3 of Calcium/calmodulin-dependent protein kinase type II subunit gamma

7. [IPI00221528](#) Mass: 42319 Score: 401 Queries matched: 11 emPAI: 0.46  
 Tax\_Id=10090 Gene\_Symbol=Actb12 Beta-actin-like protein 2

| Query                | Observed  | Mr(expt)  | Mr(calc)  | ppm   | Miss | Score | Expect   | Rank | Peptide                                                                                           |
|----------------------|-----------|-----------|-----------|-------|------|-------|----------|------|---------------------------------------------------------------------------------------------------|
| <a href="#">824</a>  | 812.4301  | 1622.8456 | 1622.8338 | 7.32  | 1    | 16    | 1.3      | 1    | R.LDLAGRDLTDYLMK.I                                                                                |
| <a href="#">885</a>  | 895.9537  | 1789.8928 | 1789.8846 | 4.59  | 0    | 103   | 3.1e-009 | 1    | R.SYELPDGQVITIGNER.F <a href="#">886</a>                                                          |
| <a href="#">918</a>  | 652.0211  | 1953.0415 | 1953.0571 | -8.00 | 0    | 47    | 0.00096  | 2    | R.VAPDEHPILLTEAPLNPK.I <a href="#">917</a> <a href="#">919</a>                                    |
| <a href="#">1038</a> | 1061.8691 | 3182.5855 | 3182.6071 | -6.78 | 0    | 109   | 3.5e-010 | 1    | R.TTGIVMDSGDGVTHTVPIYEGYALPHAILR.L <a href="#">1035</a> <a href="#">1036</a> <a href="#">1037</a> |
| <a href="#">1039</a> | 800.6558  | 3198.5941 | 3198.6020 | -2.46 | 0    | (84)  | 1.2e-007 | 1    | R.TTGIVMDSGDGVTHTVPIYEGYALPHAILR.L                                                                |

8. [IPI00169463](#) Mass: 50255 Score: 392 Queries matched: 19 emPAI: 1.01  
 Tax\_Id=10090 Gene\_Symbol=Tubb2c Tubulin beta-2C chain

| Query                | Observed | Mr(expt)  | Mr(calc)  | ppm    | Miss | Score | Expect   | Rank | Peptide                                                                 |
|----------------------|----------|-----------|-----------|--------|------|-------|----------|------|-------------------------------------------------------------------------|
| <a href="#">404</a>  | 539.2755 | 1076.5364 | 1076.5250 | 10.6   | 1    | 21    | 0.68     | 1    | K.IREEYPPDR.I <a href="#">405</a>                                       |
| <a href="#">554</a>  | 615.3074 | 1228.6002 | 1228.5910 | 7.50   | 0    | 66    | 1.6e-005 | 1    | R.ISEQFTAMFR.R                                                          |
| <a href="#">651</a>  | 660.3555 | 1318.6964 | 1318.6955 | 0.71   | 0    | 70    | 7e-006   | 1    | R.IMNTFVSVVPSPK.V                                                       |
| <a href="#">806</a>  | 801.4128 | 1600.8110 | 1600.8131 | -1.26  | 0    | 62    | 4.4e-005 | 1    | R.AVLVDLEPGTMDSVR.S                                                     |
| <a href="#">817</a>  | 809.4195 | 1616.8244 | 1616.8080 | 10.2   | 0    | (37)  | 0.014    | 1    | R.AVLVDLEPGTMDSVR.S <a href="#">818</a>                                 |
| <a href="#">823</a>  | 540.9528 | 1619.8366 | 1619.8283 | 5.13   | 0    | 53    | 0.00035  | 1    | R.LHFFMPGFAPLTSR.G <a href="#">822</a>                                  |
| <a href="#">838</a>  | 818.9071 | 1635.7996 | 1635.8232 | -14.39 | 0    | (15)  | 2.2      | 1    | R.LHFFMPGFAPLTSR.G                                                      |
| <a href="#">849</a>  | 846.4417 | 1690.8688 | 1690.8600 | 5.23   | 0    | 71    | 5e-006   | 1    | R.ALTVPBLTQMFDAK.N                                                      |
| <a href="#">850</a>  | 848.9232 | 1695.8318 | 1695.8257 | 3.65   | 0    | 53    | 0.0003   | 1    | K.NSSYFVEWIPNNVK.T <a href="#">851</a>                                  |
| <a href="#">905</a>  | 929.4750 | 1856.9354 | 1856.9342 | 0.66   | 0    | 35    | 0.017    | 2    | K.MSATFIGNSTAIQELFK.R                                                   |
| <a href="#">924</a>  | 979.9998 | 1957.9850 | 1957.9745 | 5.37   | 0    | 44    | 0.0021   | 1    | K.GHYTEGAELVSDVLDVVR.K                                                  |
| <a href="#">931</a>  | 672.0128 | 2013.0166 | 2013.0353 | -9.32  | 1    | 98    | 9.4e-009 | 1    | K.MSATFIGNSTAIQELFKR.I                                                  |
| <a href="#">1012</a> | 933.4506 | 2797.3300 | 2797.3361 | -2.20  | 0    | 88    | 5.4e-008 | 1    | R.SGPFQIFRPDNFVFGQSGAGNNWAK.G <a href="#">1011</a> <a href="#">1013</a> |

9. [IPI00109073](#) Mass: 50010 Score: 375 Queries matched: 17 emPAI: 0.89  
 Tax\_Id=10090 Gene\_Symbol=Tubb4 Tubulin beta-4 chain

| Query                | Observed | Mr(expt)  | Mr(calc)  | ppm    | Miss | Score | Expect   | Rank | Peptide                                                                 |
|----------------------|----------|-----------|-----------|--------|------|-------|----------|------|-------------------------------------------------------------------------|
| <a href="#">389</a>  | 531.2863 | 1060.5580 | 1060.5301 | 26.3   | 1    | 10    | 8.7      | 5    | K.IREEYPPDR.I                                                           |
| <a href="#">554</a>  | 615.3074 | 1228.6002 | 1228.5910 | 7.50   | 0    | 66    | 1.6e-005 | 1    | R.ISEQFTAMFR.R                                                          |
| <a href="#">651</a>  | 660.3555 | 1318.6964 | 1318.6955 | 0.71   | 0    | 70    | 7e-006   | 1    | R.IMNTFVSVVPSPK.V                                                       |
| <a href="#">806</a>  | 801.4128 | 1600.8110 | 1600.8131 | -1.26  | 0    | 62    | 4.4e-005 | 1    | R.AVLVDLEPGTMDSVR.S                                                     |
| <a href="#">817</a>  | 809.4195 | 1616.8244 | 1616.8080 | 10.2   | 0    | (37)  | 0.014    | 1    | R.AVLVDLEPGTMDSVR.S <a href="#">818</a>                                 |
| <a href="#">823</a>  | 540.9528 | 1619.8366 | 1619.8283 | 5.13   | 0    | 53    | 0.00035  | 1    | R.LHFFMPGFAPLTSR.G <a href="#">822</a>                                  |
| <a href="#">838</a>  | 818.9071 | 1635.7996 | 1635.8232 | -14.39 | 0    | (15)  | 2.2      | 1    | R.LHFFMPGFAPLTSR.G                                                      |
| <a href="#">849</a>  | 846.4417 | 1690.8688 | 1690.8600 | 5.23   | 0    | 71    | 5e-006   | 1    | R.ALTVPBLTQMFDAK.N                                                      |
| <a href="#">850</a>  | 848.9232 | 1695.8318 | 1695.8257 | 3.65   | 0    | 53    | 0.0003   | 1    | K.NSSYFVEWIPNNVK.T <a href="#">851</a>                                  |
| <a href="#">905</a>  | 929.4750 | 1856.9354 | 1856.9342 | 0.66   | 0    | 37    | 0.012    | 1    | K.MAATFIGNSTAIQELFKR.R                                                  |
| <a href="#">931</a>  | 672.0128 | 2013.0166 | 2013.0353 | -9.32  | 1    | 98    | 9.8e-009 | 2    | K.MAATFIGNSTAIQELFKR.I                                                  |
| <a href="#">1012</a> | 933.4506 | 2797.3300 | 2797.3361 | -2.20  | 0    | 88    | 5.4e-008 | 1    | R.SGPFQIFRPDNFVFGQSGAGNNWAK.G <a href="#">1011</a> <a href="#">1013</a> |

10. [IPI00109061](#) Mass: 50377 Score: 358 Queries matched: 20 emPAI: 0.88  
 Tax\_Id=10090 Gene\_Symbol=Tubb2b Tubulin beta-2B chain

| Query                | Observed | Mr(expt)  | Mr(calc)  | ppm    | Miss | Score | Expect   | Rank | Peptide                                                                 |
|----------------------|----------|-----------|-----------|--------|------|-------|----------|------|-------------------------------------------------------------------------|
| <a href="#">404</a>  | 539.2755 | 1076.5364 | 1076.5250 | 10.6   | 1    | 21    | 0.68     | 1    | K.IREEYPPDR.I <a href="#">405</a>                                       |
| <a href="#">554</a>  | 615.3074 | 1228.6002 | 1228.5910 | 7.50   | 0    | 66    | 1.6e-005 | 1    | R.ISEQFTAMFR.R                                                          |
| <a href="#">675</a>  | 676.3422 | 1350.6698 | 1350.6676 | 1.69   | 0    | 73    | 3.5e-006 | 1    | R.IMNTFVSVVPSPK.V                                                       |
| <a href="#">814</a>  | 808.4207 | 1614.8268 | 1614.8287 | -1.15  | 0    | 47    | 0.0015   | 1    | R.AILVDLEPGTMDSVR.S                                                     |
| <a href="#">823</a>  | 540.9528 | 1619.8366 | 1619.8283 | 5.13   | 0    | 53    | 0.00035  | 1    | R.LHFFMPGFAPLTSR.G <a href="#">822</a>                                  |
| <a href="#">829</a>  | 816.4133 | 1630.8120 | 1630.8236 | -7.10  | 0    | (41)  | 0.0058   | 1    | R.AILVDLEPGTMDSVR.S <a href="#">830</a> <a href="#">831</a>             |
| <a href="#">838</a>  | 818.9071 | 1635.7996 | 1635.8232 | -14.39 | 0    | (15)  | 2.2      | 1    | R.LHFFMPGFAPLTSR.G                                                      |
| <a href="#">850</a>  | 848.9232 | 1695.8318 | 1695.8257 | 3.65   | 0    | 53    | 0.0003   | 1    | K.NSSYFVEWIPNNVK.T <a href="#">851</a>                                  |
| <a href="#">905</a>  | 929.4750 | 1856.9354 | 1856.9342 | 0.66   | 0    | 35    | 0.017    | 2    | K.MSATFIGNSTAIQELFKR.R                                                  |
| <a href="#">924</a>  | 979.9998 | 1957.9850 | 1957.9745 | 5.37   | 0    | 44    | 0.0021   | 1    | K.GHYTEGAELVSDVLDVVR.K                                                  |
| <a href="#">931</a>  | 672.0128 | 2013.0166 | 2013.0353 | -9.32  | 1    | 98    | 9.4e-009 | 1    | K.MSATFIGNSTAIQELFKR.I                                                  |
| <a href="#">1012</a> | 933.4506 | 2797.3300 | 2797.3361 | -2.20  | 0    | 88    | 5.4e-008 | 1    | R.SGPFQIFRPDNFVFGQSGAGNNWAK.G <a href="#">1011</a> <a href="#">1013</a> |
| <a href="#">1034</a> | 776.3489 | 3101.3665 | 3101.4003 | -10.89 | 0    | 7     | 4.2      | 1    | K.FWEIVSDEHGIDPTGSHGSDLLQLER.I                                          |

## Proteins matching the same set of peptides:

[IPI00338039](#) Mass: 50274 Score: 358 Queries matched: 20  
Tax\_Id=10090 Gene\_Symbol=Tubb2a Tubulin beta-2A chain

11. [IPI00136703](#) Mass: 42971 Score: 341 Queries matched: 8 emPAI: 0.45  
Tax\_Id=10090 Gene\_Symbol=Ckb Creatine kinase B-type

| Query                | Observed | Mr(expt)  | Mr(calc)  | ppm    | Miss | Score | Expect   | Rank | Peptide                                                                      |
|----------------------|----------|-----------|-----------|--------|------|-------|----------|------|------------------------------------------------------------------------------|
| <a href="#">632</a>  | 652.3672 | 1302.7198 | 1302.7183 | 1.17   | 0    | 84    | 2.2e-007 | 1    | K.VLTPELYAELR.A <a href="#">631</a>                                          |
| <a href="#">809</a>  | 801.9227 | 1601.8308 | 1601.8260 | 3.00   | 0    | 96    | 1.7e-008 | 1    | K.LAVEALSSLDGDLGR.Y                                                          |
| <a href="#">841</a>  | 828.9185 | 1655.8224 | 1655.8188 | 2.17   | 0    | 72    | 4.3e-006 | 1    | R.LEQQQAIDDLMPAQK.-                                                          |
| <a href="#">903</a>  | 924.9891 | 1847.9636 | 1847.9703 | -3.60  | 0    | 31    | 0.044    | 1    | R.LGFSEVELVQMVVDGK.L                                                         |
| <a href="#">1040</a> | 897.6892 | 3586.7277 | 3586.7800 | -14.57 | 0    | 87    | 4.9e-008 | 1    | K.SMTEAEQQQLIDHFLFKPVSPLLLASGMAR.D <a href="#">1041</a> <a href="#">1042</a> |

12. [IPI00420569](#) Mass: 113457 Score: 312 Queries matched: 7 emPAI: 0.12  
Tax\_Id=10090 Gene\_Symbol=Atpla2 Sodium/potassium-transporting ATPase subunit alpha-2

| Query                | Observed | Mr(expt)  | Mr(calc)  | ppm   | Miss | Score | Expect   | Rank | Peptide                                      |
|----------------------|----------|-----------|-----------|-------|------|-------|----------|------|----------------------------------------------|
| <a href="#">558</a>  | 618.8573 | 1235.7000 | 1235.6986 | 1.17  | 0    | 52    | 0.00022  | 1    | R.LNIPVSVNPR.E <a href="#">559</a>           |
| <a href="#">590</a>  | 634.8586 | 1267.7026 | 1267.7071 | -3.48 | 0    | 22    | 0.3      | 1    | K.NMVPQQALVIR.E                              |
| <a href="#">898</a>  | 906.4799 | 1810.9452 | 1810.9425 | 1.51  | 0    | 103   | 2.8e-009 | 1    | R.QGAIIVAVTGDGVNDSPALK.K <a href="#">897</a> |
| <a href="#">902</a>  | 915.4670 | 1828.9194 | 1828.9167 | 1.53  | 0    | 124   | 2.5e-011 | 1    | K.GVGIISGNETVEDIAAR.L                        |
| <a href="#">1020</a> | 952.1171 | 2853.3295 | 2853.3313 | -0.64 | 1    | 53    | 0.00017  | 1    | K.EIPLDEKEMQDAFQNAVMEGLGLGER.V               |

## Proteins matching the same set of peptides:

[IPI00762871](#) Mass: 104717 Score: 312 Queries matched: 7  
Tax\_Id=10090 Gene\_Symbol=Atpla2 Uncharacterized protein

13. [IPI00122048](#) Mass: 113045 Score: 309 Queries matched: 7 emPAI: 0.12  
Tax\_Id=10090 Gene\_Symbol=Atpla3 Sodium/potassium-transporting ATPase subunit alpha-3

| Query                | Observed | Mr(expt)  | Mr(calc)  | ppm   | Miss | Score | Expect   | Rank | Peptide                                      |
|----------------------|----------|-----------|-----------|-------|------|-------|----------|------|----------------------------------------------|
| <a href="#">558</a>  | 618.8573 | 1235.7000 | 1235.6986 | 1.17  | 0    | 52    | 0.00022  | 1    | R.LNIPVSVNPR.D <a href="#">559</a>           |
| <a href="#">590</a>  | 634.8586 | 1267.7026 | 1267.7071 | -3.48 | 0    | 22    | 0.3      | 1    | K.NMVPQQALVIR.E                              |
| <a href="#">898</a>  | 906.4799 | 1810.9452 | 1810.9425 | 1.51  | 0    | 103   | 2.8e-009 | 1    | R.QGAIIVAVTGDGVNDSPALK.K <a href="#">897</a> |
| <a href="#">902</a>  | 915.4670 | 1828.9194 | 1828.9167 | 1.53  | 0    | 124   | 2.5e-011 | 1    | K.GVGIISGNETVEDIAAR.L                        |
| <a href="#">1022</a> | 956.1228 | 2865.3466 | 2865.3490 | -0.86 | 1    | 48    | 0.00055  | 1    | K.EQPLDEEMKEAFQNAVLELGLGLGER.V               |

## Proteins matching the same set of peptides:

[IPI00752412](#) Mass: 117548 Score: 309 Queries matched: 7  
Tax\_Id=10090 Gene\_Symbol=Atpla3 ATPase, Na+/K+ transporting, alpha 3 polypeptide, isoform CRA\_c

14. [IPI00117352](#) Mass: 50095 Score: 290 Queries matched: 17 emPAI: 0.78  
Tax\_Id=10090 Gene\_Symbol=Tubb5 Tubulin beta-5 chain

| Query                | Observed | Mr(expt)  | Mr(calc)  | ppm    | Miss | Score | Expect   | Rank | Peptide                                                                |
|----------------------|----------|-----------|-----------|--------|------|-------|----------|------|------------------------------------------------------------------------|
| <a href="#">404</a>  | 539.2755 | 1076.5364 | 1076.5250 | 10.6   | 1    | 21    | 0.68     | 1    | K.IREEYPDR.I <a href="#">405</a>                                       |
| <a href="#">554</a>  | 615.3074 | 1228.6002 | 1228.5910 | 7.50   | 0    | 66    | 1.6e-005 | 1    | R.ISEQFTAMFR.R                                                         |
| <a href="#">651</a>  | 660.3555 | 1318.6964 | 1318.6955 | 0.71   | 0    | 70    | 7e-006   | 1    | R.IMNTFSVVVSPK.V                                                       |
| <a href="#">814</a>  | 808.4207 | 1614.8268 | 1614.8287 | -1.15  | 0    | 47    | 0.0015   | 1    | R.AILVDLEPGTMDSVR.S                                                    |
| <a href="#">823</a>  | 540.9528 | 1619.8366 | 1619.8283 | 5.13   | 0    | 53    | 0.00035  | 1    | R.LHFFMPGFAPLTSR.G <a href="#">822</a>                                 |
| <a href="#">829</a>  | 816.4133 | 1630.8120 | 1630.8236 | -7.10  | 0    | (41)  | 0.0058   | 1    | R.AILVDLEPGTMDSVR.S <a href="#">830</a> <a href="#">831</a>            |
| <a href="#">838</a>  | 818.9071 | 1635.7996 | 1635.8232 | -14.39 | 0    | (15)  | 2.2      | 1    | R.LHFFMPGFAPLTSR.G                                                     |
| <a href="#">850</a>  | 848.9232 | 1695.8318 | 1695.8257 | 3.65   | 0    | 53    | 0.0003   | 1    | K.NSSYFVEWIPNNVK.T <a href="#">851</a>                                 |
| <a href="#">924</a>  | 979.9998 | 1957.9850 | 1957.9745 | 5.37   | 0    | 44    | 0.0021   | 1    | K.GHYTEGAEVLDSVLDVVR.K                                                 |
| <a href="#">1012</a> | 933.4506 | 2797.3300 | 2797.3361 | -2.20  | 0    | 88    | 5.4e-008 | 1    | R.SGPFQIFRPDVFVFGQSAGNNWAK.G <a href="#">1011</a> <a href="#">1013</a> |

15. [IPI00115546](#) Mass: 40524 Score: 278 Queries matched: 6 emPAI: 0.37  
Tax\_Id=10090 Gene\_Symbol=Gnaol Isoform Alpha-2 of Guanine nucleotide-binding protein G(o) subunit alpha

| Query               | Observed | Mr(expt)  | Mr(calc)  | ppm   | Miss | Score | Expect   | Rank | Peptide                                |
|---------------------|----------|-----------|-----------|-------|------|-------|----------|------|----------------------------------------|
| <a href="#">380</a> | 529.3142 | 1056.6138 | 1056.6179 | -3.82 | 0    | 77    | 1.3e-006 | 1    | K.LLLLGAGESGK.S <a href="#">381</a>    |
| <a href="#">799</a> | 792.3738 | 1582.7330 | 1582.7297 | 2.11  | 1    | 53    | 0.00024  | 1    | R.AMDTLGVEYDGKER.K                     |
| <a href="#">845</a> | 838.4210 | 1674.8274 | 1674.8213 | 3.67  | 0    | 101   | 5.3e-009 | 1    | R.IGADYQPTVVDILR.T <a href="#">844</a> |
| <a href="#">922</a> | 979.4433 | 1956.8720 | 1956.8631 | 4.58  | 0    | 69    | 4.7e-006 | 1    | R.MEDTEPFSAELLSAMMR.L                  |

## Proteins matching the same set of peptides:

[IPI00230192](#) Mass: 40629 Score: 278 Queries matched: 6  
Tax\_Id=10090 Gene\_Symbol=Gnaol Isoform Alpha-1 of Guanine nucleotide-binding protein G(o) subunit alpha

16. [IPI00110753](#) Mass: 50788 Score: 246 Queries matched: 7 emPAI: 0.29  
Tax\_Id=10090 Gene\_Symbol=Tubala Tubulin alpha-1A chain

| Query               | Observed  | Mr(expt)  | Mr(calc)  | ppm   | Miss | Score | Expect   | Rank | Peptide                                |
|---------------------|-----------|-----------|-----------|-------|------|-------|----------|------|----------------------------------------|
| <a href="#">351</a> | 508.2901  | 1014.5656 | 1014.5709 | -5.21 | 0    | 8     | 15       | 5    | K.DVNAAIATIK.T                         |
| <a href="#">739</a> | 729.4378  | 1456.8610 | 1456.8613 | -0.18 | 0    | 20    | 0.2      | 1    | R.LIGQIVSSITASLR.F                     |
| <a href="#">855</a> | 851.4660  | 1700.9174 | 1700.8985 | 11.1  | 0    | 91    | 3.7e-008 | 1    | R.AVFDLEPTVIDEVR.T <a href="#">854</a> |
| <a href="#">868</a> | 586.3238  | 1755.9496 | 1755.9559 | -3.62 | 0    | 49    | 0.00055  | 1    | R.IHFFLATYAPVISAEEK.A                  |
| <a href="#">900</a> | 913.0059  | 1823.9972 | 1823.9782 | 10.5  | 0    | 32    | 0.021    | 1    | K.VGINYQPTVVDVGGDLAK.V                 |
| <a href="#">994</a> | 1205.1074 | 2408.2002 | 2408.2012 | -0.41 | 0    | 112   | 2.7e-010 | 1    | R.FDGALNVDLTFEQTNLVYPR.I               |

17. [IPI00120793](#) Mass: 28131 Score: 236 Queries matched: 13 emPAI: 0.75  
Tax\_Id=10090 Gene\_Symbol=Prnp Major prion protein

| Query               | Observed | Mr(expt)  | Mr(calc)  | ppm   | Miss | Score | Expect   | Rank | Peptide                                                                                                           |
|---------------------|----------|-----------|-----------|-------|------|-------|----------|------|-------------------------------------------------------------------------------------------------------------------|
| <a href="#">354</a> | 508.7722 | 1015.5298 | 1015.5298 | 0.00  | 0    | 32    | 0.074    | 1    | K.QHTVTTTK.G                                                                                                      |
| <a href="#">421</a> | 544.7347 | 1087.4548 | 1087.4570 | -2.01 | 0    | 41    | 0.0017   | 1    | K.ESQAYDGR.R                                                                                                      |
| <a href="#">474</a> | 570.2632 | 1138.5118 | 1138.5142 | -2.10 | 0    | 36    | 0.012    | 1    | K.GENFTETDVK.M <a href="#">475</a>                                                                                |
| <a href="#">566</a> | 622.7841 | 1243.5536 | 1243.5581 | -3.61 | 1    | 37    | 0.0081   | 1    | K.ESQAYDGRR.S <a href="#">567</a> <a href="#">568</a> <a href="#">569</a> <a href="#">570</a> <a href="#">571</a> |
| <a href="#">951</a> | 713.0164 | 2136.0274 | 2136.0335 | -2.88 | 1    | 110   | 4.9e-010 | 1    | K.QHTVTTTKGENFTETDVK.M <a href="#">950</a> <a href="#">952</a>                                                    |

18. [IPI00112251](#) Mass: 50842 Score: 228 Queries matched: 11 emPAI: 0.55



Tax\_Id=10090 Gene\_Symbol=Tubb3 Tubulin beta-3 chain

| Query               | Observed | Mr(expt)  | Mr(calc)  | ppm   | Miss | Score | Expect   | Rank | Peptide                                                     |
|---------------------|----------|-----------|-----------|-------|------|-------|----------|------|-------------------------------------------------------------|
| <a href="#">554</a> | 615.3074 | 1228.6002 | 1228.5910 | 7.50  | 0    | 66    | 1.6e-005 | 1    | R.ISEQTAMFR.R                                               |
| <a href="#">651</a> | 660.3555 | 1318.6964 | 1318.6955 | 0.71  | 0    | 70    | 7e-006   | 1    | R.IMNTPSVVPSPK.V                                            |
| <a href="#">814</a> | 808.4207 | 1614.8268 | 1614.8287 | -1.15 | 0    | 47    | 0.0015   | 1    | R.AILVDLEPGTMDSVR.S                                         |
| <a href="#">822</a> | 810.9188 | 1619.8230 | 1619.8283 | -3.22 | 0    | 13    | 3.2      | 2    | R.LHFFMPGFAPLTAR.G                                          |
| <a href="#">829</a> | 816.4133 | 1630.8120 | 1630.8236 | -7.10 | 0    | (41)  | 0.0058   | 1    | R.AILVDLEPGTMDSVR.S <a href="#">830</a> <a href="#">831</a> |
| <a href="#">849</a> | 846.4417 | 1690.8688 | 1690.8600 | 5.23  | 0    | 71    | 5e-006   | 1    | R.ALTVPELTQQMFDK.N                                          |
| <a href="#">850</a> | 848.9232 | 1695.8318 | 1695.8257 | 3.65  | 0    | 53    | 0.0003   | 1    | K.NSSYFVWIPNNVK.V <a href="#">851</a>                       |
| <a href="#">924</a> | 979.9998 | 1957.9850 | 1957.9745 | 5.37  | 0    | 44    | 0.0021   | 1    | K.GHYTEGAEVLVSLDVVR.K                                       |

19. [IPI00122928](#) Mass: 50514 Score: 208 Queries matched: 10 emPAI: 0.37

Tax\_Id=10090 Gene\_Symbol=Tubb6 Tubulin beta-6 chain

| Query               | Observed | Mr(expt)  | Mr(calc)  | ppm   | Miss | Score | Expect   | Rank | Peptide                               |
|---------------------|----------|-----------|-----------|-------|------|-------|----------|------|---------------------------------------|
| <a href="#">404</a> | 539.2755 | 1076.5364 | 1076.5250 | 10.6  | 1    | 21    | 0.68     | 1    | K.IREYDPDR.I <a href="#">405</a>      |
| <a href="#">675</a> | 676.3422 | 1350.6698 | 1350.6676 | 1.69  | 0    | 73    | 3.5e-006 | 1    | R.IMNTPSVVPSPK.V                      |
| <a href="#">822</a> | 810.9188 | 1619.8230 | 1619.8283 | -3.22 | 0    | 13    | 3.2      | 2    | R.LHFFMPGFAPLTAR.G                    |
| <a href="#">849</a> | 846.4417 | 1690.8688 | 1690.8600 | 5.23  | 0    | 71    | 5e-006   | 1    | R.ALTVPELTQQMFDK.N                    |
| <a href="#">850</a> | 848.9232 | 1695.8318 | 1695.8257 | 3.65  | 0    | 53    | 0.0003   | 1    | K.NSSYFVWIPNNVK.V <a href="#">851</a> |
| <a href="#">905</a> | 929.4750 | 1856.9354 | 1856.9342 | 0.66  | 0    | 31    | 0.046    | 3    | K.MASTFIGNSTAIQELFK.R                 |
| <a href="#">924</a> | 979.9998 | 1957.9850 | 1957.9745 | 5.37  | 0    | 44    | 0.0021   | 1    | K.GHYTEGAEVLVSLDVVR.K                 |
| <a href="#">931</a> | 672.0128 | 2013.0166 | 2013.0353 | -9.32 | 1    | 82    | 3.9e-007 | 3    | K.MASTFIGNSTAIQELFKR.I                |

20. [IPI00135284](#) Mass: 36092 Score: 186 Queries matched: 4 emPAI: 0.30

Tax\_Id=10090 Gene\_Symbol=Gm16374 Glyceraldehyde-3-phosphate dehydrogenase

| Query               | Observed | Mr(expt)  | Mr(calc)  | ppm  | Miss | Score | Expect   | Rank | Peptide                                |
|---------------------|----------|-----------|-----------|------|------|-------|----------|------|----------------------------------------|
| <a href="#">688</a> | 685.3770 | 1368.7394 | 1368.7361 | 2.45 | 0    | 61    | 4.6e-005 | 1    | R.GAAQNIIPASTGAAK.A                    |
| <a href="#">691</a> | 686.8327 | 1371.6508 | 1371.6414 | 6.89 | 1    | 52    | 0.00038  | 1    | R.VVDLMAYMASKE.-                       |
| <a href="#">875</a> | 890.4037 | 1778.7928 | 1778.7900 | 1.61 | 0    | 85    | 1.5e-007 | 1    | K.LISWYDNEYGYSNR.V <a href="#">876</a> |

Proteins matching the same set of peptides:

|                                                                                                             |             |            |                    |
|-------------------------------------------------------------------------------------------------------------|-------------|------------|--------------------|
| <a href="#">IPI00271869</a>                                                                                 | Mass: 36293 | Score: 186 | Queries matched: 4 |
| Tax_Id=10090 Gene_Symbol=- 36 kDa protein                                                                   |             |            |                    |
| <a href="#">IPI00273646</a>                                                                                 | Mass: 36072 | Score: 186 | Queries matched: 4 |
| Tax_Id=10090 Gene_Symbol=Gapdh:LOC100042025 Glyceraldehyde-3-phosphate dehydrogenase                        |             |            |                    |
| <a href="#">IPI00622795</a>                                                                                 | Mass: 36074 | Score: 186 | Queries matched: 4 |
| Tax_Id=10090 Gene_Symbol=- 36 kDa protein                                                                   |             |            |                    |
| <a href="#">IPI00752289</a>                                                                                 | Mass: 36308 | Score: 186 | Queries matched: 4 |
| Tax_Id=10090 Gene_Symbol=Gm10290 Glyceraldehyde-3-phosphate dehydrogenase                                   |             |            |                    |
| <a href="#">IPI00848801</a>                                                                                 | Mass: 36100 | Score: 186 | Queries matched: 4 |
| Tax_Id=10090 Gene_Symbol=- 36 kDa protein                                                                   |             |            |                    |
| <a href="#">IPI00849045</a>                                                                                 | Mass: 36072 | Score: 186 | Queries matched: 4 |
| Tax_Id=10090 Gene_Symbol=- 36 kDa protein                                                                   |             |            |                    |
| <a href="#">IPI00850337</a>                                                                                 | Mass: 44633 | Score: 186 | Queries matched: 4 |
| Tax_Id=10090 Gene_Symbol=LOC100048117 similar to Glyceraldehyde-3-phosphate dehydrogenase (GAPDH) isoform 1 |             |            |                    |
| <a href="#">IPI00850377</a>                                                                                 | Mass: 35975 | Score: 186 | Queries matched: 4 |
| Tax_Id=10090 Gene_Symbol=- 36 kDa protein                                                                   |             |            |                    |
| <a href="#">IPI00850779</a>                                                                                 | Mass: 36076 | Score: 186 | Queries matched: 4 |
| Tax_Id=10090 Gene_Symbol=- 36 kDa protein                                                                   |             |            |                    |
| <a href="#">IPI00874682</a>                                                                                 | Mass: 36038 | Score: 186 | Queries matched: 4 |
| Tax_Id=10090 Gene_Symbol=- 36 kDa protein                                                                   |             |            |                    |
| <a href="#">IPI00874964</a>                                                                                 | Mass: 36512 | Score: 186 | Queries matched: 4 |
| Tax_Id=10090 Gene_Symbol=- 36 kDa protein                                                                   |             |            |                    |

21. [IPI00135106](#) Mass: 19584 Score: 113 Queries matched: 12 emPAI: 0.89

Tax\_Id=10090 Gene\_Symbol=Mobp Isoform 1 of Myelin-associated oligodendrocyte basic protein

| Query               | Observed | Mr(expt)  | Mr(calc)  | ppm   | Miss | Score | Expect   | Rank | Peptide                                                  |
|---------------------|----------|-----------|-----------|-------|------|-------|----------|------|----------------------------------------------------------|
| <a href="#">271</a> | 449.7446 | 897.4746  | 897.4781  | -3.80 | 1    | 10    | 7        | 1    | R.GGSPTRAPR.F <a href="#">270</a>                        |
| <a href="#">332</a> | 498.7873 | 995.5600  | 995.5586  | 1.46  | 0    | 59    | 5.6e-005 | 1    | K.SPLMPAKPR.S <a href="#">333</a>                        |
| <a href="#">343</a> | 503.3052 | 1004.5958 | 1004.5879 | 7.89  | 0    | 22    | 0.2      | 1    | R.SPFRPAKPR.S <a href="#">342</a>                        |
| <a href="#">349</a> | 506.7819 | 1011.5492 | 1011.5535 | -4.22 | 0    | (49)  | 0.00066  | 1    | K.SPLMPAKPR.S                                            |
| <a href="#">453</a> | 557.8041 | 1113.5936 | 1113.5891 | 4.11  | 1    | 36    | 0.019    | 1    | R.SSPLRGPPTS.R.G <a href="#">452</a> <a href="#">454</a> |
| <a href="#">491</a> | 580.8288 | 1159.6430 | 1159.6462 | -2.71 | 0    | 53    | 0.00038  | 1    | K.HQPAASPVVVR.A <a href="#">492</a>                      |

22. [IPI00114375](#) Mass: 62638 Score: 110 Queries matched: 1 emPAI: 0.05

Tax\_Id=10090 Gene\_Symbol=Dpysl2 Dihydropyrimidinase-related protein 2

| Query               | Observed | Mr(expt)  | Mr(calc)  | ppm  | Miss | Score | Expect   | Rank | Peptide              |
|---------------------|----------|-----------|-----------|------|------|-------|----------|------|----------------------|
| <a href="#">911</a> | 956.0205 | 1910.0264 | 1910.0149 | 6.03 | 0    | 110   | 4.8e-010 | 1    | R.FQLTDSQIYEVLSVIR.D |

23. [IPI00132042](#) Mass: 39254 Score: 105 Queries matched: 1 emPAI: 0.08

Tax\_Id=10090 Gene\_Symbol=Pdhb Pyruvate dehydrogenase E1 component subunit beta, mitochondrial

| Query               | Observed | Mr(expt)  | Mr(calc)  | ppm  | Miss | Score | Expect   | Rank | Peptide              |
|---------------------|----------|-----------|-----------|------|------|-------|----------|------|----------------------|
| <a href="#">867</a> | 874.4476 | 1746.8806 | 1746.8763 | 2.48 | 0    | 105   | 1.9e-009 | 1    | R.IMEGPAFNFLDAPAVR.V |

24. [IPI00138892](#) Mass: 15004 Score: 101 Queries matched: 2 emPAI: 0.23

Tax\_Id=10090 Gene\_Symbol=Uba52 Ubiquitin-60S ribosomal protein L40

| Query               | Observed | Mr(expt)  | Mr(calc)  | ppm  | Miss | Score | Expect   | Rank | Peptide                                  |
|---------------------|----------|-----------|-----------|------|------|-------|----------|------|------------------------------------------|
| <a href="#">883</a> | 894.4674 | 1786.9202 | 1786.9200 | 0.13 | 0    | 101   | 5.2e-009 | 1    | K.TITLEVEPSDTIENVK.A <a href="#">884</a> |

Proteins matching the same set of peptides:

|                                                                      |             |            |                    |
|----------------------------------------------------------------------|-------------|------------|--------------------|
| <a href="#">IPI00470152</a>                                          | Mass: 18282 | Score: 101 | Queries matched: 2 |
| Tax_Id=10090 Gene_Symbol=Rps27a Ubiquitin-40S ribosomal protein S27a |             |            |                    |
| <a href="#">IPI00895319</a>                                          | Mass: 22277 | Score: 101 | Queries matched: 2 |
| Tax_Id=10090 Gene_Symbol=2810422J05Rik 22 kDa protein                |             |            |                    |

[IPI00895479](#) Mass: 27181 Score: 101 Queries matched: 2  
 Tax\_Id=10090 Gene\_Symbol=2810422J05Rik 27 kDa protein  
[IPI00918763](#) Mass: 11021 Score: 101 Queries matched: 2  
 Tax\_Id=10090 Gene\_Symbol=Uba52 Ubiquitin subunit 1  
[IPI00750889](#) Mass: 22822 Score: 101 Queries matched: 2  
 Tax\_Id=10090 Gene\_Symbol=Ubc Ubc protein  
[IPI00923013](#) Mass: 26603 Score: 101 Queries matched: 2  
 Tax\_Id=10090 Gene\_Symbol=Ubb Ubiquitin B  
[IPI00923037](#) Mass: 22578 Score: 101 Queries matched: 2  
 Tax\_Id=10090 Gene\_Symbol=Ubc Putative uncharacterized protein  
[IPI00139518](#) Mass: 34348 Score: 101 Queries matched: 2  
 Tax\_Id=10090 Gene\_Symbol=Ubb Polyubiquitin-B  
[IPI00755916](#) Mass: 82614 Score: 101 Queries matched: 2  
 Tax\_Id=10090 Gene\_Symbol=Ubc ubiquitin  
[IPI00969323](#) Mass: 82603 Score: 101 Queries matched: 2  
 Tax\_Id=10090 Gene\_Symbol=Ubc Polyubiquitin-C

25. [IPI00121038](#) Mass: 368613 Score: 100 Queries matched: 3 emPAI: 0.02  
 Tax\_Id=10090 Gene\_Symbol=Vcan Isoform V0 of Versican core protein  
 Query Observed Mr(expt) Mr(calc) ppm Miss Score Expect Rank Peptide  
[641](#) 657.8627 1313.7108 1313.7092 1.28 0 15 2.3 1 R.LATVGELQAAR.N  
[716](#) 709.3745 1416.7344 1416.7283 4.37 1 45 0.0023 1 K.METSPPVKGSLSGK.V  
[926](#) 656.6585 1966.9537 1966.9670 -6.79 0 87 1.2e-007 1 R.VSVTPHPDDVGDASLTMVK.L

Proteins matching the same set of peptides:

[IPI00230441](#) Mass: 264594 Score: 100 Queries matched: 3  
 Tax\_Id=10090 Gene\_Symbol=Vcan Isoform V1 of Versican core protein  
[IPI00469172](#) Mass: 76209 Score: 100 Queries matched: 3  
 Tax\_Id=10090 Gene\_Symbol=Vcan versican core protein isoform 4  
[IPI00469565](#) Mass: 180325 Score: 100 Queries matched: 3  
 Tax\_Id=10090 Gene\_Symbol=Vcan versican core protein isoform 3  
[IPI00473932](#) Mass: 41850 Score: 100 Queries matched: 3  
 Tax\_Id=10090 Gene\_Symbol=Vcan versican core protein isoform 5  
[IPI00656277](#) Mass: 41758 Score: 100 Queries matched: 3  
 Tax\_Id=10090 Gene\_Symbol=Vcan Versican  
[IPI00875672](#) Mass: 368720 Score: 100 Queries matched: 3  
 Tax\_Id=10090 Gene\_Symbol=Vcan versican core protein isoform 1

26. [IPI00323571](#) Mass: 35901 Score: 92 Queries matched: 7 emPAI: 0.30  
 Tax\_Id=10090 Gene\_Symbol=Apoe Apolipoprotein E  
 Query Observed Mr(expt) Mr(calc) ppm Miss Score Expect Rank Peptide  
[315](#) 484.7793 967.5440 967.5451 -1.06 0 23 0.19 1 R.LGPLVEQGR.Q  
[506](#) 585.8336 1169.6526 1169.6516 0.86 1 68 9.6e-006 1 R.LGKEVQAAQAR.L 507  
[550](#) 614.8275 1227.6404 1227.6320 6.90 1 40 0.0081 1 R.GRLEEVGNQAR.D  
[749](#) 755.9121 1509.8096 1509.8012 5.62 1 10 4.9 1 R.TANLGAGAAQPLRDR.A  
[805](#) 800.4014 1598.7882 1598.7787 5.94 0 47 0.0014 1 K.ELEEQLGPVAEETR.A  
[927](#) 997.5323 1993.0500 1993.0480 1.03 0 18 0.84 1 K.IQASVATNPITPVAQENQ.-

27. [IPI00229525](#) Score: 88 Queries matched: 3  
 Tax\_Id=10090 Gene\_Symbol=Gnal Guanine nucleotide-binding protein G(olf) subunit alpha  
 Query Observed Mr(expt) Mr(calc) ppm Miss Score Expect Rank Peptide  
[380](#) 529.3142 1056.6138 1056.6179 -3.82 0 77 1.3e-006 1 R.LLLLGAAGESGK.S 381  
[527](#) 595.8279 1189.6412 1189.6165 20.8 1 0 84 9 R.MHLKQYELL.-

Proteins matching the same set of peptides:

[IPI00272681](#) Score: 88 Queries matched: 3

28. [IPI00118569](#) Mass: 44369 Score: 88 Queries matched: 2 emPAI: 0.07  
 Tax\_Id=10090 Gene\_Symbol=Gnal3 Guanine nucleotide-binding protein subunit alpha-13  
 Query Observed Mr(expt) Mr(calc) ppm Miss Score Expect Rank Peptide  
[380](#) 529.3142 1056.6138 1056.6179 -3.82 0 77 1.3e-006 1 K.LLLLGAAGESGK.S 381

Proteins matching the same set of peptides:

[IPI00230191](#) Mass: 44238 Score: 88 Queries matched: 2  
 Tax\_Id=10090 Gene\_Symbol=Gnal2 Guanine nucleotide-binding protein subunit alpha-12  
[IPI00649388](#) Mass: 20095 Score: 88 Queries matched: 2  
 Tax\_Id=10090 Gene\_Symbol=Gnal3 Putative uncharacterized protein

29. [IPI00129240](#) Mass: 55613 Score: 54 Queries matched: 1 emPAI: 0.06  
 Tax\_Id=10090 Gene\_Symbol=Vtn Vitronectin  
 Query Observed Mr(expt) Mr(calc) ppm Miss Score Expect Rank Peptide  
[929](#) 1001.0344 2000.0542 2000.0367 8.76 0 54 0.00022 1 K.LIQDVWGIEGPIIDAAFTR.I

30. [IPI00323357](#) Mass: 71055 Score: 52 Queries matched: 2 emPAI: 0.05  
 Tax\_Id=10090 Gene\_Symbol=Hspa8 Heat shock cognate 71 kDa protein  
 Query Observed Mr(expt) Mr(calc) ppm Miss Score Expect Rank Peptide  
[551](#) 614.8422 1227.6698 1227.6207 40.0 0 1 52 4 K.VEIIANDQGNR.T  
[816](#) 808.9132 1615.8118 1615.7804 19.5 0 52 0.00038 1 K.SFYPEEVSSMVLTK.M

Proteins matching the same set of peptides:

[IPI00886297](#) Mass: 68964 Score: 52 Queries matched: 2  
 Tax\_Id=10090 Gene\_Symbol=Hspa8 Hspa8 protein

31. [IPI00131366](#) Mass: 60627 Score: 50 Queries matched: 1 emPAI: 0.05  
 Tax\_Id=10090 Gene\_Symbol=Krt6b Keratin, type II cytoskeletal 6B

| Query               | Observed | Mr(expt)  | Mr(calc)  | ppm  | Miss Score | Expect | Rank    | Peptide |                  |
|---------------------|----------|-----------|-----------|------|------------|--------|---------|---------|------------------|
| <a href="#">627</a> | 651.8628 | 1301.7110 | 1301.7078 | 2.48 | 0          | 50     | 0.00059 | 1       | R.SLDLDSIIAEVK.A |

## Proteins matching the same set of peptides:

|                             |                   |                                  |                    |
|-----------------------------|-------------------|----------------------------------|--------------------|
| <a href="#">IPI00131368</a> | Mass: 59641       | Score: 50                        | Queries matched: 1 |
| Tax_Id=10090                | Gene_Symbol=Krt6a | Keratin, type II cytoskeletal 6A |                    |
| <a href="#">IPI00139301</a> | Mass: 61957       | Score: 50                        | Queries matched: 1 |
| Tax_Id=10090                | Gene_Symbol=Krt5  | Keratin, type II cytoskeletal 5  |                    |
| <a href="#">IPI00221797</a> | Mass: 59932       | Score: 50                        | Queries matched: 1 |
| Tax_Id=10090                | Gene_Symbol=Krt75 | Keratin, type II cytoskeletal 75 |                    |
| <a href="#">IPI00330480</a> | Mass: 35315       | Score: 50                        | Queries matched: 1 |
| Tax_Id=10090                | Gene_Symbol=-     | 35 kDa protein                   |                    |
| <a href="#">IPI00470126</a> | Mass: 60553       | Score: 50                        | Queries matched: 1 |
| Tax_Id=10090                | Gene_Symbol=Krt5  | Uncharacterized protein          |                    |
| <a href="#">IPI00762364</a> | Mass: 50641       | Score: 50                        | Queries matched: 1 |
| Tax_Id=10090                | Gene_Symbol=Krt6a | Uncharacterized protein          |                    |
| <a href="#">IPI00785403</a> | Mass: 59832       | Score: 50                        | Queries matched: 1 |
| Tax_Id=10090                | Gene_Symbol=Krt6b | keratin, type II cytoskeletal 6B |                    |

|     |                             |                   |                                  |                    |             |                   |               |             |                |                       |
|-----|-----------------------------|-------------------|----------------------------------|--------------------|-------------|-------------------|---------------|-------------|----------------|-----------------------|
| 32. | <a href="#">IPI00134344</a> | Mass: 272022      | Score: 48                        | Queries matched: 1 | emPAI: 0.01 |                   |               |             |                |                       |
|     | Tax_Id=10090                | Gene_Symbol=Spnb3 | Putative uncharacterized protein |                    |             |                   |               |             |                |                       |
|     | <b>Query</b>                | <b>Observed</b>   | <b>Mr(expt)</b>                  | <b>Mr(calc)</b>    | <b>ppm</b>  | <b>Miss Score</b> | <b>Expect</b> | <b>Rank</b> | <b>Peptide</b> |                       |
|     | <a href="#">930</a>         | 1001.5367         | 2001.0588                        | 2001.0531          | 2.88        | 0                 | 48            | 0.00063     | 1              | R.LVSDQNFQLELAEEAVR.K |

|     |                             |                  |                                             |                    |             |                   |               |             |                |                     |
|-----|-----------------------------|------------------|---------------------------------------------|--------------------|-------------|-------------------|---------------|-------------|----------------|---------------------|
| 33. | <a href="#">IPI00123313</a> | Mass: 118931     | Score: 47                                   | Queries matched: 1 | emPAI: 0.03 |                   |               |             |                |                     |
|     | Tax_Id=10090                | Gene_Symbol=Ubal | Ubiquitin-like modifier-activating enzyme 1 |                    |             |                   |               |             |                |                     |
|     | <b>Query</b>                | <b>Observed</b>  | <b>Mr(expt)</b>                             | <b>Mr(calc)</b>    | <b>ppm</b>  | <b>Miss Score</b> | <b>Expect</b> | <b>Rank</b> | <b>Peptide</b> |                     |
|     | <a href="#">825</a>         | 812.4624         | 1622.9102                                   | 1622.8992          | 6.84        | 0                 | 47            | 0.00062     | 1              | R.LAGTQPLEVLEAVQR.S |

|     |                             |                   |                            |                 |            |                   |               |             |                |                 |
|-----|-----------------------------|-------------------|----------------------------|-----------------|------------|-------------------|---------------|-------------|----------------|-----------------|
| 34. | <a href="#">IPI00113112</a> | Score: 38         | Queries matched: 1         |                 |            |                   |               |             |                |                 |
|     | Tax_Id=10090                | Gene_Symbol=Rab3b | Ras-related protein Rab-3B |                 |            |                   |               |             |                |                 |
|     | <b>Query</b>                | <b>Observed</b>   | <b>Mr(expt)</b>            | <b>Mr(calc)</b> | <b>ppm</b> | <b>Miss Score</b> | <b>Expect</b> | <b>Rank</b> | <b>Peptide</b> |                 |
|     | <a href="#">642</a>         | 658.8356          | 1315.6566                  | 1315.6521       | 3.49       | 0                 | 38            | 0.011       | 1              | K.LQIWDTAGQER.Y |

## Proteins matching the same set of peptides:

|                             |           |                    |
|-----------------------------|-----------|--------------------|
| <a href="#">IPI00113127</a> | Score: 38 | Queries matched: 1 |
| <a href="#">IPI00114560</a> | Score: 38 | Queries matched: 1 |
| <a href="#">IPI00116688</a> | Score: 38 | Queries matched: 1 |
| <a href="#">IPI00122965</a> | Score: 38 | Queries matched: 1 |
| <a href="#">IPI00123180</a> | Score: 38 | Queries matched: 1 |
| <a href="#">IPI00126042</a> | Score: 38 | Queries matched: 1 |
| <a href="#">IPI00130118</a> | Score: 38 | Queries matched: 1 |
| <a href="#">IPI00130489</a> | Score: 38 | Queries matched: 1 |
| <a href="#">IPI00133706</a> | Score: 38 | Queries matched: 1 |
| <a href="#">IPI00169699</a> | Score: 38 | Queries matched: 1 |
| <a href="#">IPI00223332</a> | Score: 38 | Queries matched: 1 |
| <a href="#">IPI00224319</a> | Score: 38 | Queries matched: 1 |
| <a href="#">IPI00271059</a> | Score: 38 | Queries matched: 1 |
| <a href="#">IPI00272230</a> | Score: 38 | Queries matched: 1 |
| <a href="#">IPI00316495</a> | Score: 38 | Queries matched: 1 |
| <a href="#">IPI00331128</a> | Score: 38 | Queries matched: 1 |
| <a href="#">IPI00331205</a> | Score: 38 | Queries matched: 1 |
| <a href="#">IPI00404357</a> | Score: 38 | Queries matched: 1 |
| <a href="#">IPI00411115</a> | Score: 38 | Queries matched: 1 |
| <a href="#">IPI00468209</a> | Score: 38 | Queries matched: 1 |
| <a href="#">IPI00648888</a> | Score: 38 | Queries matched: 1 |
| <a href="#">IPI00651876</a> | Score: 38 | Queries matched: 1 |
| <a href="#">IPI00654255</a> | Score: 38 | Queries matched: 1 |
| <a href="#">IPI00671283</a> | Score: 38 | Queries matched: 1 |
| <a href="#">IPI00751303</a> | Score: 38 | Queries matched: 1 |
| <a href="#">IPI00757464</a> | Score: 38 | Queries matched: 1 |
| <a href="#">IPI00830932</a> | Score: 38 | Queries matched: 1 |
| <a href="#">IPI00894915</a> | Score: 38 | Queries matched: 1 |
| <a href="#">IPI00895100</a> | Score: 38 | Queries matched: 1 |
| <a href="#">IPI00944081</a> | Score: 38 | Queries matched: 1 |

|     |                             |                  |                                         |                 |            |                   |               |             |                |                 |
|-----|-----------------------------|------------------|-----------------------------------------|-----------------|------------|-------------------|---------------|-------------|----------------|-----------------|
| 35. | <a href="#">IPI00116697</a> | Score: 38        | Queries matched: 1                      |                 |            |                   |               |             |                |                 |
|     | Tax_Id=10090                | Gene_Symbol=Rab6 | Isoform 1 of Ras-related protein Rab-6A |                 |            |                   |               |             |                |                 |
|     | <b>Query</b>                | <b>Observed</b>  | <b>Mr(expt)</b>                         | <b>Mr(calc)</b> | <b>ppm</b> | <b>Miss Score</b> | <b>Expect</b> | <b>Rank</b> | <b>Peptide</b> |                 |
|     | <a href="#">642</a>         | 658.8356         | 1315.6566                               | 1315.6521       | 3.49       | 0                 | 38            | 0.011       | 1              | R.LQLWDTAGQER.F |

## Proteins matching the same set of peptides:

|                             |           |                    |
|-----------------------------|-----------|--------------------|
| <a href="#">IPI00221836</a> | Score: 38 | Queries matched: 1 |
| <a href="#">IPI00230011</a> | Score: 38 | Queries matched: 1 |
| <a href="#">IPI00378145</a> | Score: 38 | Queries matched: 1 |
| <a href="#">IPI00757748</a> | Score: 38 | Queries matched: 1 |

|     |                             |                    |                                  |                 |            |                   |               |             |                |                 |
|-----|-----------------------------|--------------------|----------------------------------|-----------------|------------|-------------------|---------------|-------------|----------------|-----------------|
| 36. | <a href="#">IPI00136271</a> | Score: 38          | Queries matched: 1               |                 |            |                   |               |             |                |                 |
|     | Tax_Id=10090                | Gene_Symbol=Rab33b | Putative uncharacterized protein |                 |            |                   |               |             |                |                 |
|     | <b>Query</b>                | <b>Observed</b>    | <b>Mr(expt)</b>                  | <b>Mr(calc)</b> | <b>ppm</b> | <b>Miss Score</b> | <b>Expect</b> | <b>Rank</b> | <b>Peptide</b> |                 |
|     | <a href="#">642</a>         | 658.8356           | 1315.6566                        | 1315.6521       | 3.49       | 0                 | 38            | 0.011       | 1              | K.IQLWDTAGQER.F |

## Proteins matching the same set of peptides:

|                             |           |                    |
|-----------------------------|-----------|--------------------|
| <a href="#">IPI00890284</a> | Score: 38 | Queries matched: 1 |
|-----------------------------|-----------|--------------------|

|     |                             |                   |                            |                    |             |
|-----|-----------------------------|-------------------|----------------------------|--------------------|-------------|
| 37. | <a href="#">IPI00170032</a> | Mass: 24588       | Score: 38                  | Queries matched: 1 | emPAI: 0.14 |
|     | Tax_Id=10090                | Gene_Symbol=Rab15 | Ras-related protein Rab-15 |                    |             |

| Query               | Observed | Mr(expt)  | Mr(calc)  | ppm  | Miss | Score | Expect | Rank | Peptide         |
|---------------------|----------|-----------|-----------|------|------|-------|--------|------|-----------------|
| <a href="#">642</a> | 658.8356 | 1315.6566 | 1315.6521 | 3.49 | 0    | 38    | 0.011  | 1    | R.IQIWDTAGQER.Y |

Proteins matching the same set of peptides:

|                             |                   |                            |                    |
|-----------------------------|-------------------|----------------------------|--------------------|
| <a href="#">IPI00622236</a> | Mass: 19558       | Score: 38                  | Queries matched: 1 |
| Tax_Id=10090                | Gene_Symbol=Rab15 | Rab15 protein              |                    |
| <a href="#">IPI00880661</a> | Mass: 21411       | Score: 38                  | Queries matched: 1 |
| Tax_Id=10090                | Gene_Symbol=Rab15 | Uncharacterized protein    |                    |
| <a href="#">IPI00880893</a> | Mass: 19333       | Score: 38                  | Queries matched: 1 |
| Tax_Id=10090                | Gene_Symbol=Rab15 | Uncharacterized protein    |                    |
| <a href="#">IPI00881140</a> | Mass: 13439       | Score: 38                  | Queries matched: 1 |
| Tax_Id=10090                | Gene_Symbol=Rab15 | Uncharacterized protein    |                    |
| <a href="#">IPI00881258</a> | Mass: 16230       | Score: 38                  | Queries matched: 1 |
| Tax_Id=10090                | Gene_Symbol=Rab15 | Uncharacterized protein    |                    |
| <a href="#">IPI00884469</a> | Mass: 24602       | Score: 38                  | Queries matched: 1 |
| Tax_Id=10090                | Gene_Symbol=Rab15 | ras-related protein Rab-15 |                    |

---

38. [IPI00656325](#) Mass: 83131 Score: 37 Queries matched: 2 emPAI: 0.04  
Tax\_Id=10090 Gene\_Symbol=Nsf Vesicle-fusing ATPase

| Query               | Observed | Mr(expt)  | Mr(calc)  | ppm  | Miss | Score | Expect | Rank | Peptide          |
|---------------------|----------|-----------|-----------|------|------|-------|--------|------|------------------|
| <a href="#">615</a> | 646.3392 | 1290.6638 | 1290.6568 | 5.46 | 0    | 37    | 0.015  | 1    | K.NFSGAELEGLVR.A |
| <a href="#">738</a> | 729.3986 | 1456.7826 | 1456.7773 | 3.65 | 0    | 17    | 1.1    | 1    | R.VLDDGELLVQTK.N |

Proteins matching the same set of peptides:

|                             |                 |                |                    |
|-----------------------------|-----------------|----------------|--------------------|
| <a href="#">IPI00876255</a> | Mass: 83174     | Score: 37      | Queries matched: 2 |
| Tax_Id=10090                | Gene_Symbol=Nsf | 83 kDa protein |                    |

---

Mascot: <http://www.matrixscience.com/>



# Mascot Search Results

User : Dominic  
 Email : dominic.kurian@bbsrc.ac.uk  
 Search title : IPI Mouse\_15-02-2010  
 MS data file : C:\Program Files\Matrix Science\Mascot Daemon\mgf\32\_10755\mascot\_daemon\_merge.mgf  
 Database : IPI\_mouse MOUSE\_v3\_79 (54943 sequences; 24917557 residues)  
 Timestamp : 15 Feb 2011 at 11:28:31 GMT  
 Enzyme : Trypsin  
 Fixed modifications : Carbamidomethyl (C)  
 Variable modifications : Oxidation (M)  
 Mass values : Monoisotopic  
 Protein Mass : Unrestricted  
 Peptide Mass Tolerance : ± 50 ppm  
 Fragment Mass Tolerance : ± 0.2 Da  
 Max Missed Cleavages : 1  
 Instrument type : ESI-QUAD-TOF  
 Number of queries : 1078  
 Protein hits :

|                             |              |                                                     |                                                                    |
|-----------------------------|--------------|-----------------------------------------------------|--------------------------------------------------------------------|
| <a href="#">IPI00110850</a> | Tax_Id=10090 | Gene_Symbol=Actb                                    | Actin, cytoplasmic 1                                               |
| <a href="#">IPI00136929</a> | Tax_Id=10090 | Gene_Symbol=Actg1                                   | Gamma actin-like protein                                           |
| <a href="#">IPI00169463</a> | Tax_Id=10090 | Gene_Symbol=Tubb2c                                  | Tubulin beta-2C chain                                              |
| <a href="#">IPI00109073</a> | Tax_Id=10090 | Gene_Symbol=Tubb4                                   | Tubulin beta-4 chain                                               |
| <a href="#">IPI00338039</a> | Tax_Id=10090 | Gene_Symbol=Tubb2a                                  | Tubulin beta-2A chain                                              |
| <a href="#">IPI00117352</a> | Tax_Id=10090 | Gene_Symbol=Tubb5                                   | Tubulin beta-5 chain                                               |
| <a href="#">IPI00221528</a> | Tax_Id=10090 | Gene_Symbol=Actb12                                  | Beta-actin-like protein 2                                          |
| <a href="#">IPI00117348</a> | Tax_Id=10090 | Gene_Symbol=Tubal1b                                 | Tubulin alpha-1B chain                                             |
| <a href="#">IPI00110753</a> | Tax_Id=10090 | Gene_Symbol=Tubal1a                                 | Tubulin alpha-1A chain                                             |
| <a href="#">IPI00112251</a> | Tax_Id=10090 | Gene_Symbol=Tubb3                                   | Tubulin beta-3 chain                                               |
| <a href="#">IPI00122048</a> | Tax_Id=10090 | Gene_Symbol=Atpla3                                  | Sodium/potassium-transporting ATPase subunit alpha-3               |
| <a href="#">IPI00420725</a> | Tax_Id=10090 | Gene_Symbol=Camk2a                                  | Uncharacterized protein                                            |
| <a href="#">IPI00122928</a> | Tax_Id=10090 | Gene_Symbol=Tubb6                                   | Tubulin beta-6 chain                                               |
| <a href="#">IPI00115546</a> | Tax_Id=10090 | Gene_Symbol=Gnao1                                   | Isoform Alpha-2 of Guanine nucleotide-binding protein G(o) subunit |
| <a href="#">IPI00117350</a> | Tax_Id=10090 | Gene_Symbol=Tuba4a                                  | Tubulin alpha-4A chain                                             |
| <a href="#">IPI00120793</a> | Tax_Id=10090 | Gene_Symbol=Prnp                                    | Major prion protein                                                |
| <a href="#">IPI00135284</a> | Tax_Id=10090 | Gene_Symbol=Gm16374                                 | Glyceraldehyde-3-phosphate dehydrogenase                           |
| <a href="#">IPI00123176</a> | Tax_Id=10090 | Gene_Symbol=Gm6316                                  | Glyceraldehyde-3-phosphate dehydrogenase                           |
| <a href="#">IPI00474502</a> | Tax_Id=10090 | Gene_Symbol=Camk2b                                  | Calcium/calmodulin-dependent protein kinase type II subunit beta   |
| <a href="#">IPI00119063</a> | Tax_Id=10090 | Gene_Symbol=Lrpl                                    | Prolow-density lipoprotein receptor-related protein 1              |
| <a href="#">IPI00136703</a> | Tax_Id=10090 | Gene_Symbol=Ckb                                     | Creatine kinase B-type                                             |
| <a href="#">IPI00139602</a> | Tax_Id=10090 | Gene_Symbol=Cnp                                     | Isoform CNPII of 2',3'-cyclic-nucleotide 3'-phosphodiesterase      |
| <a href="#">IPI00138892</a> | Tax_Id=10090 | Gene_Symbol=Uba52                                   | Ubiquitin-60S ribosomal protein L40                                |
| <a href="#">IPI00323357</a> | Tax_Id=10090 | Gene_Symbol=Hspa8                                   | Heat shock cognate 71 kDa protein                                  |
| <a href="#">IPI00348094</a> | Tax_Id=10090 | Gene_Symbol=Tubb1                                   | Tubulin, beta 1                                                    |
| <a href="#">IPI00608020</a> | Tax_Id=10090 | Gene_Symbol=Ftl1                                    | ferritin light chain 1                                             |
| <a href="#">IPI00136372</a> | Tax_Id=10090 | Gene_Symbol=Syn1                                    | Isoform Ib of Synapsin-1                                           |
| <a href="#">IPI00555023</a> | Tax_Id=10090 | Gene_Symbol=Gstp1                                   | Glutathione S-transferase P 1                                      |
| <a href="#">IPI00114375</a> | Tax_Id=10090 | Gene_Symbol=Dpysl2                                  | Dihydropyrimidinase-related protein 2                              |
| <a href="#">IPI00652902</a> | Tax_Id=10090 | Gene_Symbol=Gnai2                                   | Putative uncharacterized protein                                   |
| <a href="#">IPI00114642</a> | Tax_Id=10090 | Gene_Symbol=Hist1h2bn;Hist1h2bl;Hist1h2bj;Hist1h2bf | Histone H2B type 1-F/J/L                                           |
| <a href="#">IPI00118569</a> | Tax_Id=10090 | Gene_Symbol=Gnal3                                   | Guanine nucleotide-binding protein subunit alpha-13                |
| <a href="#">IPI00310091</a> | Tax_Id=10090 | Gene_Symbol=Ppp2r1a                                 | Serine/threonine-protein phosphatase 2A 65 kDa regulatory subunit  |
| <a href="#">IPI00130280</a> | Tax_Id=10090 | Gene_Symbol=Atp5a1                                  | ATP synthase subunit alpha, mitochondrial                          |
| <a href="#">IPI00625729</a> | Tax_Id=10090 | Gene_Symbol=Krt1                                    | Keratin, type II cytoskeletal 1                                    |
| <a href="#">IPI00462140</a> | Tax_Id=10090 | Gene_Symbol=Krt77                                   | Keratin, type II cytoskeletal 1b                                   |
| <a href="#">IPI00408378</a> | Tax_Id=10090 | Gene_Symbol=Ywhaq                                   | Isoform 1 of 14-3-3 protein theta                                  |
| <a href="#">IPI00119067</a> | Tax_Id=10090 | Gene_Symbol=Tppp                                    | Tubulin polymerization-promoting protein                           |
| <a href="#">IPI00323571</a> | Tax_Id=10090 | Gene_Symbol=Apoe                                    | Apolipoprotein E                                                   |
| <a href="#">IPI00272878</a> | Tax_Id=10090 | Gene_Symbol=Dnml                                    | Isoform 1 of Dynamin-1                                             |
| <a href="#">IPI00230145</a> | Tax_Id=10090 | Gene_Symbol=Fthl                                    | Ferritin heavy chain                                               |
| <a href="#">IPI00123313</a> | Tax_Id=10090 | Gene_Symbol=Uba1                                    | Ubiquitin-like modifier-activating enzyme 1                        |
| <a href="#">IPI00131366</a> | Tax_Id=10090 | Gene_Symbol=Krt6b                                   | Keratin, type II cytoskeletal 6B                                   |
| <a href="#">IPI00462072</a> | Tax_Id=10090 | Gene_Symbol=Eno1;Gm5506                             | Alpha-enolase                                                      |
| <a href="#">IPI00266188</a> | Tax_Id=10090 | Gene_Symbol=Cfl12                                   | Cofilin-2                                                          |
| <a href="#">IPI00230680</a> | Tax_Id=10090 | Gene_Symbol=Atp4a                                   | Potassium-transporting ATPase alpha chain 1                        |
| <a href="#">IPI00268145</a> | Tax_Id=10090 | Gene_Symbol=Atp12a                                  | Potassium-transporting ATPase alpha chain 2                        |
| <a href="#">IPI00222632</a> | Tax_Id=10090 | Gene_Symbol=Rab31                                   | ras-related protein Rab-31                                         |
| <a href="#">IPI00755181</a> | Tax_Id=10090 | Gene_Symbol=Krt10                                   | keratin, type I cytoskeletal 10                                    |
| <a href="#">IPI00134492</a> | Tax_Id=10090 | Gene_Symbol=Syn2                                    | Isoform IIB of Synapsin-2                                          |
| <a href="#">IPI00415402</a> | Tax_Id=10090 | Gene_Symbol=Stxbp1                                  | Isoform 1 of Syntaxin-binding protein 1                            |
| <a href="#">IPI00656325</a> | Tax_Id=10090 | Gene_Symbol=Nsf                                     | Vesicle-fusing ATPase                                              |
| <a href="#">IPI00135106</a> | Tax_Id=10090 | Gene_Symbol=Mobp                                    | Isoform 1 of Myelin-associated oligodendrocyte basic protein       |

### IPI\_mouse [Decoy](#) False discovery rate

|                                                      |     |   |        |
|------------------------------------------------------|-----|---|--------|
| Peptide matches above identity threshold             | 145 | 0 | 0.00 % |
| Peptide matches above homology or identity threshold | 161 | 0 | 0.00 % |

### Select Summary Report

[Format As](#)    [Select Summary \(protein hits\)](#)    [Help](#)  
 Significance threshold  $p < 0.01$     Max. number of hits [AUTO](#)  
 Standard scoring     MudPIT scoring     Ions score or expect cut-off [0](#)    Show sub-sets [0](#)  
 Show pop-ups     Suppress pop-ups     Sort unassigned    [Decreasing Score](#)     Require bold red

1. [IPI00110850](#)    Mass: 42052    Score: 818    Queries matched: 24    emPAI: 1.88  
 Tax\_Id=10090    Gene\_Symbol=Actb    Actin, cytoplasmic 1  

| Query | Observed | Mr (expt) | Mr (calc) | ppm | Miss Score | Expect | Rank | Peptide |
|-------|----------|-----------|-----------|-----|------------|--------|------|---------|
|-------|----------|-----------|-----------|-----|------------|--------|------|---------|

|                      |           |           |           |        |   |      |          |   |                                                                                  |
|----------------------|-----------|-----------|-----------|--------|---|------|----------|---|----------------------------------------------------------------------------------|
| <a href="#">279</a>  | 488.7281  | 975.4416  | 975.4410  | 0.65   | 0 | 22   | 0.31     | 1 | K.AGFAGDDAPR.A                                                                   |
| <a href="#">403</a>  | 566.7664  | 1131.5182 | 1131.5197 | -1.24  | 0 | 39   | 0.0064   | 1 | R.GYSFTTTAER.E                                                                   |
| <a href="#">437</a>  | 581.3213  | 1160.6280 | 1160.6111 | 14.6   | 0 | 44   | 0.0035   | 1 | K.EITALAPSTMK.I <a href="#">436</a>                                              |
| <a href="#">450</a>  | 586.2927  | 1170.5708 | 1170.5638 | 6.02   | 0 | 41   | 0.0053   | 1 | R.HQGMVMGMGQK.D <a href="#">451</a>                                              |
| <a href="#">456</a>  | 589.3190  | 1176.6234 | 1176.6060 | 14.8   | 0 | (5)  | 21       | 5 | K.EITALAPSTMK.I                                                                  |
| <a href="#">482</a>  | 599.8567  | 1197.6988 | 1197.6982 | 0.52   | 0 | 60   | 3.5e-005 | 1 | R.AVFEHPVIGVPR.H <a href="#">483</a>                                             |
| <a href="#">488</a>  | 602.2874  | 1202.5602 | 1202.5536 | 5.50   | 0 | (34) | 0.027    | 1 | R.HQGMVMGMGQK.D                                                                  |
| <a href="#">665</a>  | 677.8166  | 1353.6186 | 1353.6161 | 1.91   | 1 | 74   | 2.2e-006 | 1 | K.DSVYVGDEAQSQR.G <a href="#">664</a>                                            |
| <a href="#">763</a>  | 774.9140  | 1547.8134 | 1547.8051 | 5.39   | 1 | 91   | 5.1e-008 | 1 | R.MQKEITALAPSTMK.I                                                               |
| <a href="#">854</a>  | 812.4282  | 1622.8418 | 1622.8338 | 4.98   | 1 | 52   | 0.00033  | 1 | R.LDLAGRDLTDYLMK.I                                                               |
| <a href="#">923</a>  | 895.9495  | 1789.8844 | 1789.8846 | -0.10  | 0 | 95   | 1.9e-008 | 1 | K.SYELPDGQVITIGNER.F <a href="#">922</a> <a href="#">924</a> <a href="#">925</a> |
| <a href="#">972</a>  | 652.0197  | 1953.0373 | 1953.0571 | -10.15 | 0 | 68   | 7.4e-006 | 1 | R.VAPEEHPVLLTEAPLNPK.A <a href="#">973</a>                                       |
| <a href="#">1011</a> | 1108.0479 | 2214.0812 | 2214.0627 | 8.39   | 0 | 66   | 1.3e-005 | 1 | K.DLYANTVLSGGTTMYPGLADR.M                                                        |
| <a href="#">1068</a> | 1061.8734 | 3182.5984 | 3182.6071 | -2.73  | 0 | 159  | 3.8e-015 | 1 | R.TTGIVMDSGDGVHTVPIYEGYALPHAILR.L <a href="#">1066</a> <a href="#">1067</a>      |

## Proteins matching the same set of peptides:

[IPI00874482](#) Mass: 42108 Score: 818 Queries matched: 24  
Tax\_id=10090 Gene\_Symbol=Actg1 Actin, cytoplasmic 2

2. [IPI00136929](#) Mass: 44029 Score: 726 Queries matched: 18 emPAI: 1.21

Tax\_id=10090 Gene\_Symbol=Actg1 Gamma actin-like protein

| Query                | Observed  | Mr(expt)  | Mr(calc)  | ppm    | Miss | Score | Expect   | Rank | Peptide                                                                          |
|----------------------|-----------|-----------|-----------|--------|------|-------|----------|------|----------------------------------------------------------------------------------|
| <a href="#">403</a>  | 566.7664  | 1131.5182 | 1131.5197 | -1.24  | 0    | 39    | 0.0064   | 1    | R.GYSFTTTAER.E                                                                   |
| <a href="#">437</a>  | 581.3213  | 1160.6280 | 1160.6111 | 14.6   | 0    | 44    | 0.0035   | 1    | K.EITALAPSTMK.I <a href="#">436</a>                                              |
| <a href="#">456</a>  | 589.3190  | 1176.6234 | 1176.6060 | 14.8   | 0    | (5)   | 21       | 5    | K.EITALAPSTMK.I                                                                  |
| <a href="#">665</a>  | 677.8166  | 1353.6186 | 1353.6161 | 1.91   | 1    | 74    | 2.2e-006 | 1    | K.DSVYVGDEAQSQR.G <a href="#">664</a>                                            |
| <a href="#">763</a>  | 774.9140  | 1547.8134 | 1547.8051 | 5.39   | 1    | 91    | 5.1e-008 | 1    | R.MQKEITALAPSTMK.I                                                               |
| <a href="#">854</a>  | 812.4282  | 1622.8418 | 1622.8338 | 4.98   | 1    | 52    | 0.00033  | 1    | R.LDLAGRDLTDYLMK.I                                                               |
| <a href="#">923</a>  | 895.9495  | 1789.8844 | 1789.8846 | -0.10  | 0    | 95    | 1.9e-008 | 1    | K.SYELPDGQVITIGNER.F <a href="#">922</a> <a href="#">924</a> <a href="#">925</a> |
| <a href="#">972</a>  | 652.0197  | 1953.0373 | 1953.0571 | -10.15 | 0    | 68    | 7.4e-006 | 1    | R.VAPEEHPVLLTEAPLNPK.R <a href="#">973</a>                                       |
| <a href="#">1011</a> | 1108.0479 | 2214.0812 | 2214.0627 | 8.39   | 0    | 66    | 1.3e-005 | 1    | K.DLYANTVLSGGTTMYPGLADR.M                                                        |
| <a href="#">1068</a> | 1061.8734 | 3182.5984 | 3182.6071 | -2.73  | 0    | 159   | 3.8e-015 | 1    | R.TTGIVMDSGDGVHTVPIYEGYALPHAILR.L <a href="#">1066</a> <a href="#">1067</a>      |

3. [IPI00169463](#) Mass: 50255 Score: 656 Queries matched: 29 emPAI: 1.94

Tax\_id=10090 Gene\_Symbol=Tubb2c Tubulin beta-2C chain

| Query                | Observed | Mr(expt)  | Mr(calc)  | ppm   | Miss | Score | Expect   | Rank | Peptide                                                                 |
|----------------------|----------|-----------|-----------|-------|------|-------|----------|------|-------------------------------------------------------------------------|
| <a href="#">339</a>  | 539.2715 | 1076.5284 | 1076.5250 | 3.17  | 1    | 35    | 0.026    | 1    | K.IREEYPDR.I <a href="#">338</a> <a href="#">340</a>                    |
| <a href="#">409</a>  | 572.3189 | 1142.6232 | 1142.6270 | -3.31 | 0    | (64)  | 3.3e-005 | 1    | K.LAVNMVPPFR.L <a href="#">410</a>                                      |
| <a href="#">431</a>  | 580.3211 | 1158.6276 | 1158.6219 | 4.92  | 0    | 83    | 4.5e-007 | 1    | K.LAVNMVPPFR.L                                                          |
| <a href="#">521</a>  | 615.3052 | 1228.5958 | 1228.5910 | 3.92  | 0    | 68    | 1.2e-005 | 1    | R.ISEQFTAMFR.R                                                          |
| <a href="#">541</a>  | 623.2966 | 1244.5786 | 1244.5860 | -5.87 | 0    | (6)   | 14       | 1    | R.ISEQFTAMFR.R                                                          |
| <a href="#">632</a>  | 660.3535 | 1318.6924 | 1318.6955 | -2.32 | 0    | 72    | 5e-006   | 1    | R.IMNTFSVVPSPK.V <a href="#">633</a>                                    |
| <a href="#">643</a>  | 664.8295 | 1327.6444 | 1327.6408 | 2.74  | 0    | 70    | 6.3e-006 | 1    | R.INVYNEATGGK.Y                                                         |
| <a href="#">648</a>  | 668.3517 | 1334.6888 | 1334.6904 | -1.19 | 0    | (50)  | 0.00078  | 1    | R.IMNTFSVVPSPK.V                                                        |
| <a href="#">708</a>  | 723.8540 | 1445.6934 | 1445.6820 | 7.90  | 0    | 59    | 8.6e-005 | 1    | K.EVDEQMLNVQNK.N                                                        |
| <a href="#">837</a>  | 801.4127 | 1600.8108 | 1600.8131 | -1.38 | 0    | (28)  | 0.098    | 1    | R.AVLVDLEPGTMSVRS.S                                                     |
| <a href="#">844</a>  | 809.4111 | 1616.8076 | 1616.8080 | -0.21 | 0    | 39    | 0.0077   | 1    | R.AVLVDLEPGTMSVRS.S                                                     |
| <a href="#">849</a>  | 540.9459 | 1619.8159 | 1619.8283 | -7.65 | 0    | 47    | 0.0014   | 1    | R.LHFFMPGFAPLTSR.G <a href="#">850</a>                                  |
| <a href="#">875</a>  | 846.4407 | 1690.8668 | 1690.8600 | 4.05  | 0    | 72    | 4.3e-006 | 1    | R.ALTVPPELTQQMFDK.N <a href="#">874</a>                                 |
| <a href="#">878</a>  | 848.9237 | 1695.8328 | 1695.8257 | 4.24  | 0    | 50    | 0.00065  | 1    | K.NSSYFVEWIPNVK.T <a href="#">877</a>                                   |
| <a href="#">887</a>  | 854.4349 | 1706.8552 | 1706.8549 | 0.19  | 0    | (53)  | 0.00036  | 2    | R.ALTVPPELTQQMFDK.N <a href="#">889</a> <a href="#">890</a>             |
| <a href="#">949</a>  | 929.4739 | 1856.9332 | 1856.9342 | -0.52 | 0    | 46    | 0.0016   | 1    | K.MSATFIGNSTAIQELFKR.I                                                  |
| <a href="#">992</a>  | 672.0167 | 2013.0283 | 2013.0353 | -3.50 | 1    | 134   | 1.9e-012 | 1    | K.MSATFIGNSTAIQELFKR.I                                                  |
| <a href="#">1048</a> | 933.4539 | 2797.3399 | 2797.3361 | 1.34  | 0    | 104   | 1.4e-009 | 1    | R.SGPFQIFRPDNFVFGQSGAGNNWAK.G <a href="#">1047</a> <a href="#">1049</a> |

4. [IPI00109073](#) Mass: 50010 Score: 638 Queries matched: 25 emPAI: 1.60

Tax\_id=10090 Gene\_Symbol=Tubb4 Tubulin beta-4 chain

| Query                | Observed | Mr(expt)  | Mr(calc)  | ppm   | Miss | Score | Expect   | Rank | Peptide                                                                 |
|----------------------|----------|-----------|-----------|-------|------|-------|----------|------|-------------------------------------------------------------------------|
| <a href="#">409</a>  | 572.3189 | 1142.6232 | 1142.6270 | -3.31 | 0    | (64)  | 3.3e-005 | 1    | K.LAVNMVPPFR.L <a href="#">410</a>                                      |
| <a href="#">431</a>  | 580.3211 | 1158.6276 | 1158.6219 | 4.92  | 0    | 83    | 4.5e-007 | 1    | K.LAVNMVPPFR.L                                                          |
| <a href="#">521</a>  | 615.3052 | 1228.5958 | 1228.5910 | 3.92  | 0    | 68    | 1.2e-005 | 1    | R.ISEQFTAMFR.R                                                          |
| <a href="#">541</a>  | 623.2966 | 1244.5786 | 1244.5860 | -5.87 | 0    | (6)   | 14       | 1    | R.ISEQFTAMFR.R                                                          |
| <a href="#">632</a>  | 660.3535 | 1318.6924 | 1318.6955 | -2.32 | 0    | 72    | 5e-006   | 1    | R.IMNTFSVVPSPK.V <a href="#">633</a>                                    |
| <a href="#">648</a>  | 668.3517 | 1334.6888 | 1334.6904 | -1.19 | 0    | (50)  | 0.00078  | 1    | R.IMNTFSVVPSPK.V                                                        |
| <a href="#">837</a>  | 801.4127 | 1600.8108 | 1600.8131 | -1.38 | 0    | (28)  | 0.098    | 1    | R.AVLVDLEPGTMSVRS.S                                                     |
| <a href="#">844</a>  | 809.4111 | 1616.8076 | 1616.8080 | -0.21 | 0    | 39    | 0.0077   | 1    | R.AVLVDLEPGTMSVRS.S                                                     |
| <a href="#">849</a>  | 540.9459 | 1619.8159 | 1619.8283 | -7.65 | 0    | 47    | 0.0014   | 1    | R.LHFFMPGFAPLTSR.G <a href="#">850</a>                                  |
| <a href="#">875</a>  | 846.4407 | 1690.8668 | 1690.8600 | 4.05  | 0    | 72    | 4.3e-006 | 1    | R.ALTVPPELTQQMFDK.N <a href="#">874</a>                                 |
| <a href="#">878</a>  | 848.9237 | 1695.8328 | 1695.8257 | 4.24  | 0    | 50    | 0.00065  | 1    | K.NSSYFVEWIPNVK.T <a href="#">877</a>                                   |
| <a href="#">887</a>  | 854.4349 | 1706.8552 | 1706.8549 | 0.19  | 0    | (53)  | 0.00036  | 2    | R.ALTVPPELTQQMFDK.N <a href="#">889</a> <a href="#">890</a>             |
| <a href="#">937</a>  | 915.4451 | 1828.8756 | 1828.8744 | 0.69  | 0    | 114   | 2.2e-010 | 1    | R.INVYNEATGGYVPR.A                                                      |
| <a href="#">949</a>  | 929.4739 | 1856.9332 | 1856.9342 | -0.52 | 0    | 43    | 0.0029   | 2    | K.MAATFIGNSTAIQELFKR.R                                                  |
| <a href="#">992</a>  | 672.0167 | 2013.0283 | 2013.0353 | -3.50 | 1    | 116   | 1.3e-010 | 3    | K.MAATFIGNSTAIQELFKR.I                                                  |
| <a href="#">1048</a> | 933.4539 | 2797.3399 | 2797.3361 | 1.34  | 0    | 104   | 1.4e-009 | 1    | R.SGPFQIFRPDNFVFGQSGAGNNWAK.G <a href="#">1047</a> <a href="#">1049</a> |

5. [IPI00338039](#) Mass: 50274 Score: 600 Queries matched: 30 emPAI: 1.76

Tax\_id=10090 Gene\_Symbol=Tubb2a Tubulin beta-2A chain

| Query               | Observed | Mr(expt)  | Mr(calc)  | ppm   | Miss | Score | Expect   | Rank | Peptide                                              |
|---------------------|----------|-----------|-----------|-------|------|-------|----------|------|------------------------------------------------------|
| <a href="#">339</a> | 539.2715 | 1076.5284 | 1076.5250 | 3.17  | 1    | 35    | 0.026    | 1    | K.IREEYPDR.I <a href="#">338</a> <a href="#">340</a> |
| <a href="#">409</a> | 572.3189 | 1142.6232 | 1142.6270 | -3.31 | 0    | (64)  | 3.3e-005 | 1    | K.LAVNMVPPFR.L <a href="#">410</a>                   |
| <a href="#">431</a> | 580.3211 | 1158.6276 | 1158.6219 | 4.92  | 0    | 83    | 4.5e-007 | 1    | K.LAVNMVPPFR.L                                       |
| <a href="#">521</a> | 615.3052 | 1228.5958 | 1228.5910 | 3.92  | 0    | 68    | 1.2e-005 | 1    | R.ISEQFTAMFR.R                                       |
| <a href="#">541</a> | 623.2966 | 1244.5786 | 1244.5860 | -5.87 | 0    | (6)   | 14       | 1    | R.ISEQFTAMFR.R                                       |
| <a href="#">600</a> | 676.3409 | 1350.6672 | 1350.6676 | -0.24 | 0    | 63    | 3.8e-005 | 1    | R.IMNTFSVVPSPK.V <a href="#">659</a>                 |
| <a href="#">708</a> | 723.8540 | 1445.6934 | 1445.6820 | 7.90  | 0    | 59    | 8.6e-005 | 1    | K.EVDEQMLNVQNK.N                                     |
| <a href="#">841</a> | 808.4230 | 1614.8314 | 1614.8287 | 1.70  | 0    | 77    | 1.5e-006 | 1    | R.AILVDLEPGTMSVRS.S <a href="#">842</a>              |
| <a href="#">849</a> | 540.9459 | 1619.8159 | 1619.8283 | -7.65 | 0    | 47    | 0.0014   | 1    | R.LHFFMPGFAPLTSR.G <a href="#">850</a>               |

|                      |                          |                           |                           |                        |                   |                      |                          |                   |                                                  |                           |
|----------------------|--------------------------|---------------------------|---------------------------|------------------------|-------------------|----------------------|--------------------------|-------------------|--------------------------------------------------|---------------------------|
| <a href="#">858</a>  | <a href="#">816.4194</a> | <a href="#">1630.8242</a> | <a href="#">1630.8236</a> | <a href="#">0.38</a>   | <a href="#">0</a> | <a href="#">(58)</a> | <a href="#">0.00011</a>  | <a href="#">1</a> | <a href="#">R.AILVDLEPGTMSVR.S</a>               | <a href="#">859</a>       |
| <a href="#">878</a>  | <a href="#">848.9237</a> | <a href="#">1695.8328</a> | <a href="#">1695.8257</a> | <a href="#">4.24</a>   | <a href="#">0</a> | <a href="#">50</a>   | <a href="#">0.00065</a>  | <a href="#">1</a> | <a href="#">K.NSSYPVEIWPNNVK.T</a>               | <a href="#">877</a>       |
| <a href="#">887</a>  | <a href="#">854.4349</a> | <a href="#">1706.8552</a> | <a href="#">1706.8549</a> | <a href="#">0.19</a>   | <a href="#">0</a> | <a href="#">66</a>   | <a href="#">1.6e-005</a> | <a href="#">1</a> | <a href="#">R.ALTVPPELTQQMFDSK.N</a>             | <a href="#">889 890</a>   |
| <a href="#">896</a>  | <a href="#">862.4366</a> | <a href="#">1722.8586</a> | <a href="#">1722.8498</a> | <a href="#">5.11</a>   | <a href="#">0</a> | <a href="#">(11)</a> | <a href="#">4.4</a>      | <a href="#">1</a> | <a href="#">R.ALTVPPELTQQMFDSK.N</a>             |                           |
| <a href="#">949</a>  | <a href="#">929.4739</a> | <a href="#">1856.9332</a> | <a href="#">1856.9342</a> | <a href="#">-0.52</a>  | <a href="#">0</a> | <a href="#">46</a>   | <a href="#">0.0016</a>   | <a href="#">1</a> | <a href="#">K.MSATFIGNSTAIQELFK.R</a>            |                           |
| <a href="#">958</a>  | <a href="#">624.3088</a> | <a href="#">1869.9046</a> | <a href="#">1869.9373</a> | <a href="#">-17.50</a> | <a href="#">1</a> | <a href="#">33</a>   | <a href="#">0.028</a>    | <a href="#">1</a> | <a href="#">R.INVYNEAAGNKYVPR.A</a>              |                           |
| <a href="#">992</a>  | <a href="#">672.0167</a> | <a href="#">2013.0283</a> | <a href="#">2013.0353</a> | <a href="#">-3.50</a>  | <a href="#">1</a> | <a href="#">134</a>  | <a href="#">1.9e-012</a> | <a href="#">1</a> | <a href="#">K.MSATFIGNSTAIQELFKR.I</a>           |                           |
| <a href="#">1048</a> | <a href="#">933.4539</a> | <a href="#">2797.3399</a> | <a href="#">2797.3361</a> | <a href="#">1.34</a>   | <a href="#">0</a> | <a href="#">104</a>  | <a href="#">1.4e-009</a> | <a href="#">1</a> | <a href="#">R.SGPFQIFRPDNFVFGQSGAGNNWAK.G</a>    | <a href="#">1047 1049</a> |
| <a href="#">1065</a> | <a href="#">776.3421</a> | <a href="#">3101.3393</a> | <a href="#">3101.4003</a> | <a href="#">-19.66</a> | <a href="#">0</a> | <a href="#">29</a>   | <a href="#">0.022</a>    | <a href="#">1</a> | <a href="#">K.FWEVISDEHGIDPTGSGYHGDSDLQLER.I</a> |                           |

6. [IPI00117352](#) Mass: 50095 Score: 553 Queries matched: 25 emPAI: 1.60

Tax\_Id=10090 Gene\_Symbol=Tubb5 Tubulin beta-5 chain

| Query                | Observed                 | Mr(expt)                  | Mr(calc)                  | ppm                    | Miss              | Score                | Expect                   | Rank              | Peptide                                       |                           |
|----------------------|--------------------------|---------------------------|---------------------------|------------------------|-------------------|----------------------|--------------------------|-------------------|-----------------------------------------------|---------------------------|
| <a href="#">339</a>  | <a href="#">539.2715</a> | <a href="#">1076.5284</a> | <a href="#">1076.5250</a> | <a href="#">3.17</a>   | <a href="#">1</a> | <a href="#">35</a>   | <a href="#">0.026</a>    | <a href="#">1</a> | <a href="#">K.IREYVDPDR.I</a>                 | <a href="#">338 340</a>   |
| <a href="#">409</a>  | <a href="#">572.3189</a> | <a href="#">1142.6232</a> | <a href="#">1142.6270</a> | <a href="#">-3.31</a>  | <a href="#">0</a> | <a href="#">(64)</a> | <a href="#">3.3e-005</a> | <a href="#">1</a> | <a href="#">K.LAVNMVFPFR.L</a>                | <a href="#">410</a>       |
| <a href="#">431</a>  | <a href="#">580.3211</a> | <a href="#">1158.6276</a> | <a href="#">1158.6219</a> | <a href="#">4.92</a>   | <a href="#">0</a> | <a href="#">83</a>   | <a href="#">4.5e-007</a> | <a href="#">1</a> | <a href="#">K.LAVNMVFPFR.L</a>                |                           |
| <a href="#">521</a>  | <a href="#">615.3052</a> | <a href="#">1228.5958</a> | <a href="#">1228.5910</a> | <a href="#">3.92</a>   | <a href="#">0</a> | <a href="#">68</a>   | <a href="#">1.2e-005</a> | <a href="#">1</a> | <a href="#">R.ISEQFTAMFR.R</a>                |                           |
| <a href="#">541</a>  | <a href="#">623.2966</a> | <a href="#">1244.5786</a> | <a href="#">1244.5860</a> | <a href="#">-5.87</a>  | <a href="#">0</a> | <a href="#">(6)</a>  | <a href="#">14</a>       | <a href="#">1</a> | <a href="#">R.ISEQFTAMFR.R</a>                |                           |
| <a href="#">608</a>  | <a href="#">651.3157</a> | <a href="#">1300.6168</a> | <a href="#">1300.6299</a> | <a href="#">-10.05</a> | <a href="#">0</a> | <a href="#">52</a>   | <a href="#">0.00041</a>  | <a href="#">1</a> | <a href="#">R.ISVYNEATGGK.Y</a>               |                           |
| <a href="#">632</a>  | <a href="#">660.3535</a> | <a href="#">1318.6924</a> | <a href="#">1318.6955</a> | <a href="#">-2.32</a>  | <a href="#">0</a> | <a href="#">72</a>   | <a href="#">5e-006</a>   | <a href="#">1</a> | <a href="#">R.IMNTFSVVVSPK.V</a>              | <a href="#">633</a>       |
| <a href="#">648</a>  | <a href="#">668.3517</a> | <a href="#">1334.6888</a> | <a href="#">1334.6904</a> | <a href="#">-1.19</a>  | <a href="#">0</a> | <a href="#">(50)</a> | <a href="#">0.00078</a>  | <a href="#">1</a> | <a href="#">R.IMNTFSVVVSPK.V</a>              |                           |
| <a href="#">708</a>  | <a href="#">723.8540</a> | <a href="#">1445.6934</a> | <a href="#">1445.6820</a> | <a href="#">7.90</a>   | <a href="#">0</a> | <a href="#">59</a>   | <a href="#">8.6e-005</a> | <a href="#">1</a> | <a href="#">K.EVDEQMLNVTQNK.N</a>             |                           |
| <a href="#">841</a>  | <a href="#">808.4230</a> | <a href="#">1614.8314</a> | <a href="#">1614.8287</a> | <a href="#">1.70</a>   | <a href="#">0</a> | <a href="#">77</a>   | <a href="#">1.5e-006</a> | <a href="#">1</a> | <a href="#">R.AILVDLEPGTMSVR.S</a>            | <a href="#">842</a>       |
| <a href="#">849</a>  | <a href="#">540.9459</a> | <a href="#">1619.8159</a> | <a href="#">1619.8283</a> | <a href="#">-7.65</a>  | <a href="#">0</a> | <a href="#">47</a>   | <a href="#">0.0014</a>   | <a href="#">1</a> | <a href="#">R.LHFFMPGFAPLTSR.G</a>            | <a href="#">850</a>       |
| <a href="#">858</a>  | <a href="#">816.4194</a> | <a href="#">1630.8242</a> | <a href="#">1630.8236</a> | <a href="#">0.38</a>   | <a href="#">0</a> | <a href="#">(58)</a> | <a href="#">0.00011</a>  | <a href="#">1</a> | <a href="#">R.AILVDLEPGTMSVR.S</a>            | <a href="#">859</a>       |
| <a href="#">864</a>  | <a href="#">830.4438</a> | <a href="#">1658.8730</a> | <a href="#">1658.8879</a> | <a href="#">-8.98</a>  | <a href="#">0</a> | <a href="#">72</a>   | <a href="#">3.8e-006</a> | <a href="#">1</a> | <a href="#">R.ALTVPPELTQQVFDK.N</a>           |                           |
| <a href="#">878</a>  | <a href="#">848.9237</a> | <a href="#">1695.8328</a> | <a href="#">1695.8257</a> | <a href="#">4.24</a>   | <a href="#">0</a> | <a href="#">50</a>   | <a href="#">0.00065</a>  | <a href="#">1</a> | <a href="#">K.NSSYPVEIWPNNVK.T</a>            | <a href="#">877</a>       |
| <a href="#">1048</a> | <a href="#">933.4539</a> | <a href="#">2797.3399</a> | <a href="#">2797.3361</a> | <a href="#">1.34</a>   | <a href="#">0</a> | <a href="#">104</a>  | <a href="#">1.4e-009</a> | <a href="#">1</a> | <a href="#">R.SGPFQIFRPDNFVFGQSGAGNNWAK.G</a> | <a href="#">1047 1049</a> |

7. [IPI00221528](#) Mass: 42319 Score: 498 Queries matched: 13 emPAI: 0.83

Tax\_Id=10090 Gene\_Symbol=Actb12 Beta-actin-like protein 2

| Query                | Observed                  | Mr(expt)                  | Mr(calc)                  | ppm                    | Miss              | Score                | Expect                   | Rank              | Peptide                                            |                             |
|----------------------|---------------------------|---------------------------|---------------------------|------------------------|-------------------|----------------------|--------------------------|-------------------|----------------------------------------------------|-----------------------------|
| <a href="#">450</a>  | <a href="#">586.2927</a>  | <a href="#">1170.5708</a> | <a href="#">1170.5638</a> | <a href="#">6.02</a>   | <a href="#">0</a> | <a href="#">41</a>   | <a href="#">0.0053</a>   | <a href="#">1</a> | <a href="#">R.HQGMVVMGQK.D</a>                     | <a href="#">451</a>         |
| <a href="#">488</a>  | <a href="#">602.2874</a>  | <a href="#">1202.5602</a> | <a href="#">1202.5536</a> | <a href="#">5.50</a>   | <a href="#">0</a> | <a href="#">(34)</a> | <a href="#">0.027</a>    | <a href="#">1</a> | <a href="#">R.HQGMVVMGQK.D</a>                     |                             |
| <a href="#">854</a>  | <a href="#">812.4282</a>  | <a href="#">1622.8418</a> | <a href="#">1622.8338</a> | <a href="#">4.98</a>   | <a href="#">1</a> | <a href="#">52</a>   | <a href="#">0.00033</a>  | <a href="#">1</a> | <a href="#">R.LDLAQRDLTDYLMK.I</a>                 |                             |
| <a href="#">923</a>  | <a href="#">895.9495</a>  | <a href="#">1789.8844</a> | <a href="#">1789.8846</a> | <a href="#">-0.10</a>  | <a href="#">0</a> | <a href="#">95</a>   | <a href="#">1.9e-008</a> | <a href="#">1</a> | <a href="#">R.SYELPDGQVITIGNER.F</a>               | <a href="#">922 924 925</a> |
| <a href="#">972</a>  | <a href="#">652.0197</a>  | <a href="#">1953.0373</a> | <a href="#">1953.0571</a> | <a href="#">-10.15</a> | <a href="#">0</a> | <a href="#">50</a>   | <a href="#">0.00051</a>  | <a href="#">2</a> | <a href="#">R.VAPDEHPILLTEAPLNPK.I</a>             | <a href="#">973</a>         |
| <a href="#">1068</a> | <a href="#">1061.8734</a> | <a href="#">3182.5984</a> | <a href="#">3182.6071</a> | <a href="#">-2.73</a>  | <a href="#">0</a> | <a href="#">159</a>  | <a href="#">3.8e-015</a> | <a href="#">1</a> | <a href="#">R.TTGIVMDSGDGVTHVTPIYEGYALPHAILR.L</a> | <a href="#">1066 1067</a>   |

8. [IPI00117348](#) Mass: 50804 Score: 427 Queries matched: 16 emPAI: 0.55

Tax\_Id=10090 Gene\_Symbol=Tubalb Tubulin alpha-1B chain

| Query                | Observed                  | Mr(expt)                  | Mr(calc)                  | ppm                   | Miss              | Score               | Expect                   | Rank              | Peptide                                   |                                     |
|----------------------|---------------------------|---------------------------|---------------------------|-----------------------|-------------------|---------------------|--------------------------|-------------------|-------------------------------------------|-------------------------------------|
| <a href="#">243</a>  | <a href="#">455.2580</a>  | <a href="#">908.5014</a>  | <a href="#">908.4967</a>  | <a href="#">5.21</a>  | <a href="#">1</a> | <a href="#">2</a>   | <a href="#">33</a>       | <a href="#">2</a> | <a href="#">R.LSVDYGKK.S</a>              |                                     |
| <a href="#">294</a>  | <a href="#">508.2930</a>  | <a href="#">1014.5714</a> | <a href="#">1014.5709</a> | <a href="#">0.50</a>  | <a href="#">0</a> | <a href="#">26</a>  | <a href="#">0.19</a>     | <a href="#">1</a> | <a href="#">K.DVNAAIATIK.T</a>            |                                     |
| <a href="#">736</a>  | <a href="#">744.4408</a>  | <a href="#">1486.8670</a> | <a href="#">1486.8719</a> | <a href="#">-3.24</a> | <a href="#">0</a> | <a href="#">18</a>  | <a href="#">0.45</a>     | <a href="#">1</a> | <a href="#">R.LIQVIVSSITASLR.F</a>        |                                     |
| <a href="#">883</a>  | <a href="#">851.4699</a>  | <a href="#">1700.9252</a> | <a href="#">1700.8985</a> | <a href="#">15.7</a>  | <a href="#">0</a> | <a href="#">80</a>  | <a href="#">4.4e-007</a> | <a href="#">1</a> | <a href="#">R.AVFDVLEPTVIDEVR.T</a>       | <a href="#">882</a>                 |
| <a href="#">893</a>  | <a href="#">859.9458</a>  | <a href="#">1717.8770</a> | <a href="#">1717.8747</a> | <a href="#">1.36</a>  | <a href="#">0</a> | <a href="#">67</a>  | <a href="#">1.3e-005</a> | <a href="#">1</a> | <a href="#">R.NLDIERPTYTLNLR.L</a>        | <a href="#">894</a>                 |
| <a href="#">934</a>  | <a href="#">912.9977</a>  | <a href="#">1823.9808</a> | <a href="#">1823.9782</a> | <a href="#">1.47</a>  | <a href="#">0</a> | <a href="#">29</a>  | <a href="#">0.052</a>    | <a href="#">1</a> | <a href="#">K.VINGIQPPTVPPGGDLAK.V</a>    | <a href="#">935</a>                 |
| <a href="#">990</a>  | <a href="#">1004.4575</a> | <a href="#">2006.9004</a> | <a href="#">2006.8858</a> | <a href="#">7.30</a>  | <a href="#">0</a> | <a href="#">89</a>  | <a href="#">5.8e-008</a> | <a href="#">1</a> | <a href="#">K.TIGGGDDSFNTFFSETGAGK.H</a>  |                                     |
| <a href="#">1028</a> | <a href="#">1205.1035</a> | <a href="#">2408.1924</a> | <a href="#">2408.2012</a> | <a href="#">-3.65</a> | <a href="#">0</a> | <a href="#">125</a> | <a href="#">1.4e-011</a> | <a href="#">1</a> | <a href="#">R.FDGALNVDLTEFQTNLVYPYR.I</a> |                                     |
| <a href="#">1033</a> | <a href="#">805.7347</a>  | <a href="#">2414.1823</a> | <a href="#">2414.1978</a> | <a href="#">-6.44</a> | <a href="#">1</a> | <a href="#">78</a>  | <a href="#">8e-007</a>   | <a href="#">1</a> | <a href="#">R.QLFHPQLITGKEDAANNYR.G</a>   | <a href="#">1030 1031 1032 1034</a> |

Proteins matching the same set of peptides:

[IPI00403810](#) Mass: 50562 Score: 427 Queries matched: 16

Tax\_Id=10090 Gene\_Symbol=Tubalc Tubulin alpha-1C chain

9. [IPI00110753](#) Mass: 50788 Score: 427 Queries matched: 16 emPAI: 0.55

Tax\_Id=10090 Gene\_Symbol=Tubala Tubulin alpha-1A chain

| Query                | Observed                  | Mr(expt)                  | Mr(calc)                  | ppm                   | Miss              | Score               | Expect                   | Rank              | Peptide                                   |                                     |
|----------------------|---------------------------|---------------------------|---------------------------|-----------------------|-------------------|---------------------|--------------------------|-------------------|-------------------------------------------|-------------------------------------|
| <a href="#">243</a>  | <a href="#">455.2580</a>  | <a href="#">908.5014</a>  | <a href="#">908.4967</a>  | <a href="#">5.21</a>  | <a href="#">1</a> | <a href="#">2</a>   | <a href="#">33</a>       | <a href="#">2</a> | <a href="#">R.LSVDYGKK.S</a>              |                                     |
| <a href="#">294</a>  | <a href="#">508.2930</a>  | <a href="#">1014.5714</a> | <a href="#">1014.5709</a> | <a href="#">0.50</a>  | <a href="#">0</a> | <a href="#">26</a>  | <a href="#">0.19</a>     | <a href="#">1</a> | <a href="#">K.DVNAAIATIK.T</a>            |                                     |
| <a href="#">713</a>  | <a href="#">729.4382</a>  | <a href="#">1456.8618</a> | <a href="#">1456.8613</a> | <a href="#">0.37</a>  | <a href="#">0</a> | <a href="#">8</a>   | <a href="#">2.8</a>      | <a href="#">1</a> | <a href="#">R.LIQVIVSSITASLR.F</a>        |                                     |
| <a href="#">883</a>  | <a href="#">851.4699</a>  | <a href="#">1700.9252</a> | <a href="#">1700.8985</a> | <a href="#">15.7</a>  | <a href="#">0</a> | <a href="#">80</a>  | <a href="#">4.4e-007</a> | <a href="#">1</a> | <a href="#">R.AVFDVLEPTVIDEVR.T</a>       | <a href="#">882</a>                 |
| <a href="#">893</a>  | <a href="#">859.9458</a>  | <a href="#">1717.8770</a> | <a href="#">1717.8747</a> | <a href="#">1.36</a>  | <a href="#">0</a> | <a href="#">67</a>  | <a href="#">1.3e-005</a> | <a href="#">1</a> | <a href="#">R.NLDIERPTYTLNLR.L</a>        | <a href="#">894</a>                 |
| <a href="#">934</a>  | <a href="#">912.9977</a>  | <a href="#">1823.9808</a> | <a href="#">1823.9782</a> | <a href="#">1.47</a>  | <a href="#">0</a> | <a href="#">29</a>  | <a href="#">0.052</a>    | <a href="#">1</a> | <a href="#">K.VINGIQPPTVPPGGDLAK.V</a>    | <a href="#">935</a>                 |
| <a href="#">990</a>  | <a href="#">1004.4575</a> | <a href="#">2006.9004</a> | <a href="#">2006.8858</a> | <a href="#">7.30</a>  | <a href="#">0</a> | <a href="#">89</a>  | <a href="#">5.8e-008</a> | <a href="#">1</a> | <a href="#">K.TIGGGDDSFNTFFSETGAGK.H</a>  |                                     |
| <a href="#">1028</a> | <a href="#">1205.1035</a> | <a href="#">2408.1924</a> | <a href="#">2408.2012</a> | <a href="#">-3.65</a> | <a href="#">0</a> | <a href="#">125</a> | <a href="#">1.4e-011</a> | <a href="#">1</a> | <a href="#">R.FDGALNVDLTEFQTNLVYPYR.I</a> |                                     |
| <a href="#">1033</a> | <a href="#">805.7347</a>  | <a href="#">2414.1823</a> | <a href="#">2414.1978</a> | <a href="#">-6.44</a> | <a href="#">1</a> | <a href="#">78</a>  | <a href="#">8e-007</a>   | <a href="#">1</a> | <a href="#">R.QLFHPQLITGKEDAANNYR.G</a>   | <a href="#">1030 1031 1032 1034</a> |

10. [IPI00112251](#) Mass: 50842 Score: 426 Queries matched: 21 emPAI: 0.87

Tax\_Id=10090 Gene\_Symbol=Tubb3 Tubulin beta-3 chain

| Query               | Observed                 | Mr(expt)                  | Mr(calc)                  | ppm                   | Miss              | Score                | Expect                   | Rank              | Peptide                              |                     |
|---------------------|--------------------------|---------------------------|---------------------------|-----------------------|-------------------|----------------------|--------------------------|-------------------|--------------------------------------|---------------------|
| <a href="#">332</a> | <a href="#">532.2687</a> | <a href="#">1062.5228</a> | <a href="#">1062.5094</a> | <a href="#">12.7</a>  | <a href="#">1</a> | <a href="#">25</a>   | <a href="#">0.26</a>     | <a href="#">1</a> | <a href="#">K.VREEYVDR.I</a>         |                     |
| <a href="#">409</a> | <a href="#">572.3189</a> | <a href="#">1142.6232</a> | <a href="#">1142.6270</a> | <a href="#">-3.31</a> | <a href="#">0</a> | <a href="#">(64)</a> | <a href="#">3.3e-005</a> | <a href="#">1</a> | <a href="#">K.LAVNMVFPFR.L</a>       | <a href="#">410</a> |
| <a href="#">431</a> | <a href="#">580.3211</a> | <a href="#">1158.6276</a> | <a href="#">1158.6219</a> | <a href="#">4.92</a>  | <a href="#">0</a> | <a href="#">83</a>   | <a href="#">4.5e-007</a> | <a href="#">1</a> | <a href="#">K.LAVNMVFPFR.L</a>       |                     |
| <a href="#">521</a> | <a href="#">615.3052</a> | <a href="#">1228.5958</a> | <a href="#">1228.5910</a> | <a href="#">3.92</a>  | <a href="#">0</a> | <a href="#">68</a>   | <a href="#">1.2e-005</a> | <a href="#">1</a> | <a href="#">R.ISEQFTAMFR.R</a>       |                     |
| <a href="#">541</a> | <a href="#">623.2966</a> | <a href="#">1244.5786</a> | <a href="#">1244.5860</a> | <a href="#">-5.87</a> | <a href="#">0</a> | <a href="#">(6)</a>  | <a href="#">14</a>       | <a href="#">1</a> | <a href="#">R.ISEQFTAMFR.R</a>       |                     |
| <a href="#">632</a> | <a href="#">660.3535</a> | <a href="#">1318.6924</a> | <a href="#">1318.6955</a> | <a href="#">-2.32</a> | <a href="#">0</a> | <a href="#">72</a>   | <a href="#">5e-006</a>   | <a href="#">1</a> | <a href="#">R.IMNTFSVVVSPK.V</a>     | <a href="#">633</a> |
| <a href="#">648</a> | <a href="#">668.3517</a> | <a href="#">1334.6888</a> | <a href="#">1334.6904</a> | <a href="#">-1.19</a> | <a href="#">0</a> | <a href="#">(50)</a> | <a href="#">0.00078</a>  | <a href="#">1</a> | <a href="#">R.IMNTFSVVVSPK.V</a>     |                     |
| <a href="#">841</a> | <a href="#">808.4230</a> | <a href="#">1614.8314</a> | <a href="#">1614.8287</a> | <a href="#">1.70</a>  | <a href="#">0</a> | <a href="#">77</a>   | <a href="#">1.5e-006</a> | <a href="#">1</a> | <a href="#">R.AILVDLEPGTMSVR.S</a>   | <a href="#">842</a> |
| <a href="#">850</a> | <a href="#">810.9166</a> | <a href="#">1619.8186</a> | <a href="#">1619.8283</a> | <a href="#">-5.94</a> | <a href="#">0</a> | <a href="#">19</a>   | <a href="#">0.83</a>     | <a href="#">2</a> | <a href="#">R.LHFFMPGFAPLTAR.G</a>   |                     |
| <a href="#">858</a> | <a href="#">816.4194</a> | <a href="#">1630.8242</a> | <a href="#">1630.8236</a> | <a href="#">0.38</a>  | <a href="#">0</a> | <a href="#">(58)</a> | <a href="#">0.00011</a>  | <a href="#">1</a> | <a href="#">R.AILVDLEPGTMSVR.S</a>   | <a href="#">859</a> |
| <a href="#">875</a> | <a href="#">846.4407</a> | <a href="#">1690.8668</a> | <a href="#">1690.8600</a> | <a href="#">4.05</a>  | <a href="#">0</a> | <a href="#">72</a>   | <a href="#">4.3e-006</a> | <a href="#">1</a> | <a href="#">R.ALTVPPELTQQMFDAK.N</a> | <a href="#">874</a> |
| <a href="#">878</a> |                          |                           |                           |                       |                   |                      |                          |                   |                                      |                     |

|                                                                                                                           |                             |              |                     |                     |             |             |                                                                                                                       |
|---------------------------------------------------------------------------------------------------------------------------|-----------------------------|--------------|---------------------|---------------------|-------------|-------------|-----------------------------------------------------------------------------------------------------------------------|
| 11.                                                                                                                       | <a href="#">IPI00122048</a> | Mass: 113045 | Score: 397          | Queries matched: 12 | emPAI: 0.22 |             |                                                                                                                       |
| Tax_Id=10090 Gene_Symbol=Atpla3 Sodium/potassium-transporting ATPase subunit alpha-3                                      |                             |              |                     |                     |             |             |                                                                                                                       |
| Query                                                                                                                     | Observed                    | Mr(expt)     | Mr(calc)            | ppm                 | Miss Score  | Expect Rank | Peptide                                                                                                               |
| <a href="#">327</a>                                                                                                       | 528.2854                    | 1054.5562    | 1054.5520           | 4.07                | 1           | 18          | 1.1 1 K.GGDRVADLR.I                                                                                                   |
| <a href="#">529</a>                                                                                                       | 618.8585                    | 1235.7024    | 1235.6986           | 3.11                | 0           | 54          | 0.00015 1 R.LNIPVSVQVNR.D <a href="#">530</a>                                                                         |
| <a href="#">573</a>                                                                                                       | 634.8594                    | 1267.7042    | 1267.7071           | -2.22               | 0           | 40          | 0.0054 1 K.NMVPQQALVIR.E <a href="#">574</a>                                                                          |
| <a href="#">685</a>                                                                                                       | 691.3808                    | 1380.7470    | 1380.7435           | 2.55                | 0           | 57          | 0.00012 1 K.VIMVTGDHPITAK.A                                                                                           |
| <a href="#">931</a>                                                                                                       | 906.4794                    | 1810.9442    | 1810.9425           | 0.96                | 0           | 91          | 4.8e-008 1 R.QGAIVAVTGDGVNDSPALK.K                                                                                    |
| <a href="#">938</a>                                                                                                       | 915.4692                    | 1828.9238    | 1828.9167           | 3.93                | 0           | 116         | 1.6e-010 1 K.GVGIIEGNETVEDIAR.L                                                                                       |
| <a href="#">970</a>                                                                                                       | 647.3470                    | 1939.0192    | 1939.0375           | -9.43               | 1           | 33          | 0.025 1 R.QGAIVAVTGDGVNDSPALKK.A                                                                                      |
| <a href="#">1039</a>                                                                                                      | 1232.6124                   | 2463.2102    | 2463.1951           | 6.13                | 0           | 133         | 2.6e-012 1 K.QAADMILLDDNFASIVTGVVEGR.L                                                                                |
| <a href="#">1057</a>                                                                                                      | 956.1147                    | 2865.3223    | 2865.3490           | -9.34               | 1           | 64          | 1.1e-005 1 K.EQPLDEEMKEAFQNAYLELGGGER.V <a href="#">1058</a>                                                          |
| Proteins matching the same set of peptides:                                                                               |                             |              |                     |                     |             |             |                                                                                                                       |
| <a href="#">IPI00752412</a>                                                                                               | Mass: 117548                | Score: 397   | Queries matched: 12 |                     |             |             |                                                                                                                       |
| Tax_Id=10090 Gene_Symbol=Atpla3 ATPase, Na+/K+ transporting, alpha 3 polypeptide, isoform CRA_c                           |                             |              |                     |                     |             |             |                                                                                                                       |
| 12.                                                                                                                       | <a href="#">IPI00420725</a> | Mass: 55882  | Score: 371          | Queries matched: 16 | emPAI: 0.67 |             |                                                                                                                       |
| Tax_Id=10090 Gene_Symbol=Camk2a Uncharacterized protein                                                                   |                             |              |                     |                     |             |             |                                                                                                                       |
| Query                                                                                                                     | Observed                    | Mr(expt)     | Mr(calc)            | ppm                 | Miss Score  | Expect Rank | Peptide                                                                                                               |
| <a href="#">323</a>                                                                                                       | 525.2839                    | 1048.5532    | 1048.5553           | -1.94               | 0           | 22          | 0.58 1 K.VLAGQEYAAK.I                                                                                                 |
| <a href="#">330</a>                                                                                                       | 530.3022                    | 1058.5898    | 1058.5906           | -0.73               | 1           | 51          | 0.00061 1 K.MLTINPSKR.I <a href="#">331</a>                                                                           |
| <a href="#">417</a>                                                                                                       | 574.3328                    | 1146.6510    | 1146.6431           | 6.96                | 0           | 62          | 3.2e-005 1 K.GAILTMLATR.N                                                                                             |
| <a href="#">568</a>                                                                                                       | 631.3073                    | 1260.6000    | 1260.5927           | 5.79                | 0           | 62          | 4.9e-005 1 R.FYFENLWSR.N <a href="#">566</a>                                                                          |
| <a href="#">614</a>                                                                                                       | 652.3557                    | 1302.6968    | 1302.6932           | 2.81                | 0           | 71          | 5e-006 1 R.ITQVLDAAGIPR.T <a href="#">613</a>                                                                         |
| <a href="#">653</a>                                                                                                       | 670.8925                    | 1339.7704    | 1339.7711           | -0.47               | 0           | 63          | 2e-005 1 R.DLKPEPLLASK.L <a href="#">654</a>                                                                          |
| <a href="#">860</a>                                                                                                       | 816.8933                    | 1631.7720    | 1631.7719           | 0.10                | 0           | 69          | 7.9e-006 1 R.FTEEYQLFEELGK.G                                                                                          |
| <a href="#">996</a>                                                                                                       | 1040.9818                   | 2079.9490    | 2079.9426           | 3.12                | 0           | 76          | 1e-006 1 K.AGAYDFSPWDVTPEAK.D <a href="#">997</a>                                                                     |
| <a href="#">1024</a>                                                                                                      | 783.7260                    | 2348.1562    | 2348.1689           | -5.40               | 1           | 52          | 0.00029 1 R.FTEEYQLFEELGKGFVSVR.R                                                                                     |
| <a href="#">1046</a>                                                                                                      | 888.7650                    | 2663.2732    | 2663.2755           | -0.87               | 1           | 47          | 0.00083 1 K.AGAYDFSPWDVTPEAKDLINK.M <a href="#">1045</a>                                                              |
| Proteins matching the same set of peptides:                                                                               |                             |              |                     |                     |             |             |                                                                                                                       |
| <a href="#">IPI00621806</a>                                                                                               | Mass: 54651                 | Score: 371   | Queries matched: 16 |                     |             |             |                                                                                                                       |
| Tax_Id=10090 Gene_Symbol=Camk2a Isoform Alpha CaMKII of Calcium/calmodulin-dependent protein kinase type II subunit alpha |                             |              |                     |                     |             |             |                                                                                                                       |
| 13.                                                                                                                       | <a href="#">IPI00122928</a> | Mass: 50514  | Score: 368          | Queries matched: 18 | emPAI: 0.66 |             |                                                                                                                       |
| Tax_Id=10090 Gene_Symbol=Tubb6 Tubulin beta-6 chain                                                                       |                             |              |                     |                     |             |             |                                                                                                                       |
| Query                                                                                                                     | Observed                    | Mr(expt)     | Mr(calc)            | ppm                 | Miss Score  | Expect Rank | Peptide                                                                                                               |
| <a href="#">339</a>                                                                                                       | 539.2715                    | 1076.5284    | 1076.5250           | 3.17                | 1           | 35          | 0.026 1 K.IREYYPDR.I <a href="#">338</a> <a href="#">340</a>                                                          |
| <a href="#">409</a>                                                                                                       | 572.3189                    | 1142.6232    | 1142.6270           | -3.31               | 0           | (64)        | 3.3e-005 1 K.LAVNMVPPFR.L <a href="#">410</a>                                                                         |
| <a href="#">431</a>                                                                                                       | 580.3211                    | 1158.6276    | 1158.6219           | 4.92                | 0           | 83          | 4.5e-007 1 K.LAVNMVPPFR.L                                                                                             |
| <a href="#">660</a>                                                                                                       | 676.3409                    | 1350.6672    | 1350.6676           | -0.24               | 0           | 63          | 3.8e-005 1 R.IMNTFSVMSPK.V <a href="#">659</a>                                                                        |
| <a href="#">850</a>                                                                                                       | 810.9166                    | 1619.8186    | 1619.8283           | -5.94               | 0           | 19          | 0.83 2 R.LHFFMPGFAPLTAR.G                                                                                             |
| <a href="#">875</a>                                                                                                       | 846.4407                    | 1690.8668    | 1690.8600           | 4.05                | 0           | 72          | 4.3e-006 1 R.ALTVPPELTQQMFDPAK.N <a href="#">874</a>                                                                  |
| <a href="#">878</a>                                                                                                       | 848.9237                    | 1695.8328    | 1695.8257           | 4.24                | 0           | 50          | 0.00065 1 K.NSSYFVWVFNPNVK.V <a href="#">877</a>                                                                      |
| <a href="#">887</a>                                                                                                       | 854.4349                    | 1706.8552    | 1706.8549           | 0.19                | 0           | (53)        | 0.00036 2 R.ALTVPPELTQQMFDPAK.N <a href="#">889</a> <a href="#">890</a>                                               |
| <a href="#">949</a>                                                                                                       | 929.4739                    | 1856.9332    | 1856.9342           | -0.52               | 0           | 36          | 0.016 3 K.MASTFIGNSTAIQELFK.R                                                                                         |
| <a href="#">992</a>                                                                                                       | 672.0167                    | 2013.0283    | 2013.0353           | -3.50               | 1           | 116         | 1.3e-010 2 K.MASTFIGNSTAIQELFKR.I                                                                                     |
| 14.                                                                                                                       | <a href="#">IPI00115546</a> | Mass: 40524  | Score: 367          | Queries matched: 10 | emPAI: 0.48 |             |                                                                                                                       |
| Tax_Id=10090 Gene_Symbol=Gnaol Isoform Alpha-2 of Guanine nucleotide-binding protein G(o) subunit alpha                   |                             |              |                     |                     |             |             |                                                                                                                       |
| Query                                                                                                                     | Observed                    | Mr(expt)     | Mr(calc)            | ppm                 | Miss Score  | Expect Rank | Peptide                                                                                                               |
| <a href="#">233</a>                                                                                                       | 446.2509                    | 890.4872     | 890.4610            | 29.4                | 0           | 14          | 3.5 1 R.LFDVGGQR.S                                                                                                    |
| <a href="#">329</a>                                                                                                       | 529.3133                    | 1056.6120    | 1056.6179           | -5.53               | 0           | 72          | 4.1e-006 1 K.LLLLGGESGK.S                                                                                             |
| <a href="#">416</a>                                                                                                       | 573.3207                    | 1144.6268    | 1144.6088           | 15.8                | 1           | 4           | 34 8 K.NLKEDGISAAK.D                                                                                                  |
| <a href="#">707</a>                                                                                                       | 723.3447                    | 1444.6748    | 1444.6834           | -5.94               | 0           | 8           | 9.9 2 K.IIHEDGFSGEDVK.Q                                                                                               |
| <a href="#">834</a>                                                                                                       | 792.3745                    | 1582.7344    | 1582.7297           | 3.00                | 1           | 62          | 3.2e-005 1 R.AMDTLGVEYGDKER.K                                                                                         |
| <a href="#">871</a>                                                                                                       | 838.4184                    | 1674.8222    | 1674.8213           | 0.56                | 0           | 115         | 2.1e-010 1 R.IGAGDYQTEQDILR.T <a href="#">872</a>                                                                     |
| <a href="#">976</a>                                                                                                       | 979.4461                    | 1956.8776    | 1956.8631           | 7.44                | 0           | 101         | 2.8e-009 1 R.MEDTEPFSAELLSAMMR.L <a href="#">975</a>                                                                  |
| <a href="#">986</a>                                                                                                       | 987.4356                    | 1972.8566    | 1972.8580           | -0.69               | 0           | (47)        | 0.00058 1 R.MEDTEPFSAELLSAMMR.L                                                                                       |
| Proteins matching the same set of peptides:                                                                               |                             |              |                     |                     |             |             |                                                                                                                       |
| <a href="#">IPI00230192</a>                                                                                               | Mass: 40629                 | Score: 367   | Queries matched: 10 |                     |             |             |                                                                                                                       |
| Tax_Id=10090 Gene_Symbol=Gnaol Isoform Alpha-1 of Guanine nucleotide-binding protein G(o) subunit alpha                   |                             |              |                     |                     |             |             |                                                                                                                       |
| 15.                                                                                                                       | <a href="#">IPI00117350</a> | Mass: 50634  | Score: 316          | Queries matched: 13 | emPAI: 0.46 |             |                                                                                                                       |
| Tax_Id=10090 Gene_Symbol=Tuba4a Tubulin alpha-4A chain                                                                    |                             |              |                     |                     |             |             |                                                                                                                       |
| Query                                                                                                                     | Observed                    | Mr(expt)     | Mr(calc)            | ppm                 | Miss Score  | Expect Rank | Peptide                                                                                                               |
| <a href="#">243</a>                                                                                                       | 455.2580                    | 908.5014     | 908.4967            | 5.21                | 1           | 2           | 33 2 R.LSVDYGKK.S                                                                                                     |
| <a href="#">736</a>                                                                                                       | 744.4408                    | 1486.8670    | 1486.8719           | -3.24               | 0           | 18          | 0.45 1 R.LISQIVSSITASLR.F                                                                                             |
| <a href="#">893</a>                                                                                                       | 859.9458                    | 1717.8770    | 1717.8747           | 1.36                | 0           | 67          | 1.3e-005 1 R.NLDIERPTYTNLNR.L <a href="#">894</a>                                                                     |
| <a href="#">934</a>                                                                                                       | 912.9977                    | 1823.9808    | 1823.9782           | 1.47                | 0           | 29          | 0.052 1 K.GVINGYQPTVPPGGDLAK.V <a href="#">935</a>                                                                    |
| <a href="#">1021</a>                                                                                                      | 768.4006                    | 2302.1800    | 2302.1957           | -6.85               | 1           | 45          | 0.0013 1 R.AVFVDLEPTVIDEIRNGPYR.Q                                                                                     |
| <a href="#">1028</a>                                                                                                      | 1205.1035                   | 2408.1924    | 2408.2012           | -3.65               | 0           | 125         | 1.4e-011 1 R.FDGNLVDLTFQTNLVPYPR.I                                                                                    |
| <a href="#">1033</a>                                                                                                      | 805.7347                    | 2414.1823    | 2414.1978           | -6.44               | 1           | 78          | 8e-007 1 R.QLFHPQLITGKEDAANNYAR.G <a href="#">1030</a> <a href="#">1031</a> <a href="#">1032</a> <a href="#">1034</a> |
| 16.                                                                                                                       | <a href="#">IPI00120793</a> | Mass: 28131  | Score: 282          | Queries matched: 11 | emPAI: 0.40 |             |                                                                                                                       |
| Tax_Id=10090 Gene_Symbol=Prnp Major prion protein                                                                         |                             |              |                     |                     |             |             |                                                                                                                       |
| Query                                                                                                                     | Observed                    | Mr(expt)     | Mr(calc)            | ppm                 | Miss Score  | Expect Rank | Peptide                                                                                                               |
| <a href="#">295</a>                                                                                                       | 508.7724                    | 1015.5302    | 1015.5298           | 0.40                | 0           | 23          | 0.55 1 K.QHTVTTTK.G                                                                                                   |
| <a href="#">349</a>                                                                                                       | 544.7376                    | 1087.4606    | 1087.4570           | 3.33                | 0           | 41          | 0.0019 1 K.ESQAYYDGR.R                                                                                                |
| <a href="#">406</a>                                                                                                       | 570.2620                    | 1138.5094    | 1138.5142           | -4.21               | 0           | 23          | 0.2 1 K.GENFTETDVK.M                                                                                                  |
| <a href="#">539</a>                                                                                                       | 622.7877                    | 1243.5608    | 1243.5581           | 2.18                | 1           | 39          | 0.005 1 K.ESQAYYDGR.S <a href="#">536</a> <a href="#">537</a> <a href="#">538</a>                                     |
| <a href="#">1002</a>                                                                                                      | 713.0141                    | 2136.0205    | 2136.0335           | -6.11               | 1           | 106         | 1.2e-009 1 K.QHTVTTTKGENFTETDVK.M <a href="#">1003</a> <a href="#">1004</a> <a href="#">1005</a>                      |



|                                                                                                             |                             |              |                     |                     |             |             |                                                     |
|-------------------------------------------------------------------------------------------------------------|-----------------------------|--------------|---------------------|---------------------|-------------|-------------|-----------------------------------------------------|
| 17.                                                                                                         | <a href="#">IPI00135284</a> | Mass: 36092  | Score: 250          | Queries matched: 12 | emPAI: 0.42 |             |                                                     |
| Tax_Id=10090 Gene_Symbol=Gm16374 Glyceraldehyde-3-phosphate dehydrogenase                                   |                             |              |                     |                     |             |             |                                                     |
| Query                                                                                                       | Observed                    | Mr(expt)     | Mr(calc)            | ppm                 | Miss Score  | Expect Rank | Peptide                                             |
| <a href="#">61</a>                                                                                          | 596.3636                    | 595.3563     | 595.3442            | 20.4                | 0           | 8           | 4.6 2 K.AGAHLK.G                                    |
| <a href="#">243</a>                                                                                         | 455.2580                    | 908.5014     | 908.5192            | -19.52              | 1           | 0           | 52 8 K.AGAHLKGGAK.R                                 |
| <a href="#">667</a>                                                                                         | 678.8332                    | 1355.6518    | 1355.6465           | 3.96                | 1           | 51          | 0.00049 1 R.VVDLMAYMASKE.- <a href="#">666</a>      |
| <a href="#">675</a>                                                                                         | 685.3760                    | 1368.7374    | 1368.7361           | 0.99                | 0           | 59          | 6.8e-005 1 R.GAAQNIIPASTGAAK.A <a href="#">674</a>  |
| <a href="#">676</a>                                                                                         | 686.8303                    | 1371.6460    | 1371.6414           | 3.39                | 1           | (13)        | 3.2 1 R.VVDLMAYMASKE.-                              |
| <a href="#">690</a>                                                                                         | 694.8303                    | 1387.6460    | 1387.6363           | 7.01                | 1           | (21)        | 0.49 1 R.VVDLMAYMASKE.-                             |
| <a href="#">879</a>                                                                                         | 849.4503                    | 1696.8860    | 1696.8856           | 0.25                | 1           | 76          | 1.5e-006 1 R.DRGAQNIIPASTGAAK.A <a href="#">880</a> |
| <a href="#">914</a>                                                                                         | 890.4036                    | 1778.7926    | 1778.7900           | 1.50                | 0           | 85          | 1.5e-007 1 K.LISWYDNEYGYSNR.V <a href="#">913</a>   |
| Proteins matching the same set of peptides:                                                                 |                             |              |                     |                     |             |             |                                                     |
| <a href="#">IPI00273646</a>                                                                                 | Mass: 36072                 | Score: 250   | Queries matched: 12 |                     |             |             |                                                     |
| Tax_Id=10090 Gene_Symbol=Gapdh;LOC100042025 Glyceraldehyde-3-phosphate dehydrogenase                        |                             |              |                     |                     |             |             |                                                     |
| <a href="#">IPI00622795</a>                                                                                 | Mass: 36074                 | Score: 250   | Queries matched: 12 |                     |             |             |                                                     |
| Tax_Id=10090 Gene_Symbol=- 36 kDa protein                                                                   |                             |              |                     |                     |             |             |                                                     |
| <a href="#">IPI00848801</a>                                                                                 | Mass: 36100                 | Score: 250   | Queries matched: 12 |                     |             |             |                                                     |
| Tax_Id=10090 Gene_Symbol=- 36 kDa protein                                                                   |                             |              |                     |                     |             |             |                                                     |
| <a href="#">IPI00849045</a>                                                                                 | Mass: 36072                 | Score: 250   | Queries matched: 12 |                     |             |             |                                                     |
| Tax_Id=10090 Gene_Symbol=- 36 kDa protein                                                                   |                             |              |                     |                     |             |             |                                                     |
| <a href="#">IPI00850337</a>                                                                                 | Mass: 44633                 | Score: 250   | Queries matched: 12 |                     |             |             |                                                     |
| Tax_Id=10090 Gene_Symbol=LOC100048117 similar to Glyceraldehyde-3-phosphate dehydrogenase (GAPDH) isoform 1 |                             |              |                     |                     |             |             |                                                     |
| <a href="#">IPI00850377</a>                                                                                 | Mass: 35975                 | Score: 250   | Queries matched: 12 |                     |             |             |                                                     |
| Tax_Id=10090 Gene_Symbol=- 36 kDa protein                                                                   |                             |              |                     |                     |             |             |                                                     |
| <a href="#">IPI00874682</a>                                                                                 | Mass: 36038                 | Score: 250   | Queries matched: 12 |                     |             |             |                                                     |
| Tax_Id=10090 Gene_Symbol=- 36 kDa protein                                                                   |                             |              |                     |                     |             |             |                                                     |
| <a href="#">IPI00874964</a>                                                                                 | Mass: 36512                 | Score: 250   | Queries matched: 12 |                     |             |             |                                                     |
| Tax_Id=10090 Gene_Symbol=- 36 kDa protein                                                                   |                             |              |                     |                     |             |             |                                                     |
| 18.                                                                                                         | <a href="#">IPI00123176</a> | Mass: 36804  | Score: 236          | Queries matched: 9  | emPAI: 0.29 |             |                                                     |
| Tax_Id=10090 Gene_Symbol=Gm6316 Glyceraldehyde-3-phosphate dehydrogenase                                    |                             |              |                     |                     |             |             |                                                     |
| Query                                                                                                       | Observed                    | Mr(expt)     | Mr(calc)            | ppm                 | Miss Score  | Expect Rank | Peptide                                             |
| <a href="#">61</a>                                                                                          | 596.3636                    | 595.3563     | 595.3442            | 20.4                | 0           | 8           | 4.6 2 K.AGAHLK.G                                    |
| <a href="#">243</a>                                                                                         | 455.2580                    | 908.5014     | 908.5192            | -19.52              | 1           | 0           | 52 8 K.AGAHLKGGAK.R                                 |
| <a href="#">675</a>                                                                                         | 685.3760                    | 1368.7374    | 1368.7361           | 0.99                | 0           | 59          | 6.8e-005 1 R.GAAQNIIPASTGAAK.A <a href="#">674</a>  |
| <a href="#">841</a>                                                                                         | 808.4230                    | 1614.8314    | 1614.8512           | -12.23              | 1           | 0           | 70 6 R.VPTRNVSVVLDLTCR.L                            |
| <a href="#">879</a>                                                                                         | 849.4503                    | 1696.8860    | 1696.8856           | 0.25                | 1           | 76          | 1.5e-006 1 R.DRGAQNIIPASTGAAK.A <a href="#">880</a> |
| <a href="#">914</a>                                                                                         | 890.4036                    | 1778.7926    | 1778.7900           | 1.50                | 0           | 85          | 1.5e-007 1 K.LISWYDNEYGYSNR.M <a href="#">913</a>   |
| 19.                                                                                                         | <a href="#">IPI00474502</a> | Mass: 61164  | Score: 171          | Queries matched: 10 | emPAI: 0.23 |             |                                                     |
| Tax_Id=10090 Gene_Symbol=Camk2b Calcium/calmodulin-dependent protein kinase type II subunit beta            |                             |              |                     |                     |             |             |                                                     |
| Query                                                                                                       | Observed                    | Mr(expt)     | Mr(calc)            | ppm                 | Miss Score  | Expect Rank | Peptide                                             |
| <a href="#">414</a>                                                                                         | 572.8060                    | 1143.5974    | 1143.5964           | 0.90                | 0           | 18          | 1.6 1 R.FYFENLLAK.N                                 |
| <a href="#">417</a>                                                                                         | 574.3328                    | 1146.6510    | 1146.6431           | 6.96                | 0           | 62          | 3.2e-005 1 K.GAILTTLMLATR.N                         |
| <a href="#">653</a>                                                                                         | 670.8925                    | 1339.7704    | 1339.7711           | -0.47               | 0           | 63          | 2e-005 1 R.DLKPENLLLASK.C <a href="#">654</a>       |
| <a href="#">678</a>                                                                                         | 687.3762                    | 1372.7378    | 1372.7310           | 4.96                | 1           | 23          | 0.38 1 K.KADGVKPTNSTK.N <a href="#">677</a>         |
| <a href="#">696</a>                                                                                         | 702.3779                    | 1402.7412    | 1402.7317           | 6.80                | 0           | 46          | 0.0019 1 R.LTQYIDGQGRPR.T                           |
| <a href="#">848</a>                                                                                         | 810.8851                    | 1619.7556    | 1619.7355           | 12.4                | 0           | 9           | 7.7 1 R.FTDEYQLYEDIGK.G                             |
| <a href="#">996</a>                                                                                         | 1040.9818                   | 2079.9490    | 2079.9426           | 3.12                | 0           | 76          | 1e-006 1 K.AGAYFPSPEDWTVTPEAK.N <a href="#">997</a> |
| Proteins matching the same set of peptides:                                                                 |                             |              |                     |                     |             |             |                                                     |
| <a href="#">IPI00475302</a>                                                                                 | Mass: 60053                 | Score: 171   | Queries matched: 10 |                     |             |             |                                                     |
| Tax_Id=10090 Gene_Symbol=Camk2b calcium/calmodulin-dependent protein kinase type II subunit beta isoform 3  |                             |              |                     |                     |             |             |                                                     |
| <a href="#">IPI00515669</a>                                                                                 | Mass: 57159                 | Score: 171   | Queries matched: 10 |                     |             |             |                                                     |
| Tax_Id=10090 Gene_Symbol=Camk2b Calcium/calmodulin-dependent protein kinase II, beta                        |                             |              |                     |                     |             |             |                                                     |
| <a href="#">IPI00648630</a>                                                                                 | Mass: 58788                 | Score: 171   | Queries matched: 10 |                     |             |             |                                                     |
| Tax_Id=10090 Gene_Symbol=Camk2b Calcium/calmodulin-dependent protein kinase II, beta                        |                             |              |                     |                     |             |             |                                                     |
| <a href="#">IPI00649778</a>                                                                                 | Mass: 73827                 | Score: 171   | Queries matched: 10 |                     |             |             |                                                     |
| Tax_Id=10090 Gene_Symbol=Camk2b Calcium/calmodulin-dependent protein kinase II, beta, isoform CRA_b         |                             |              |                     |                     |             |             |                                                     |
| <a href="#">IPI00875723</a>                                                                                 | Mass: 68686                 | Score: 171   | Queries matched: 10 |                     |             |             |                                                     |
| Tax_Id=10090 Gene_Symbol=Camk2b 68 kDa protein                                                              |                             |              |                     |                     |             |             |                                                     |
| <a href="#">IPI00470962</a>                                                                                 | Mass: 61436                 | Score: 171   | Queries matched: 10 |                     |             |             |                                                     |
| Tax_Id=10090 Gene_Symbol=Camk2b calcium/calmodulin-dependent protein kinase type II subunit beta isoform 1  |                             |              |                     |                     |             |             |                                                     |
| <a href="#">IPI00649296</a>                                                                                 | Mass: 65906                 | Score: 171   | Queries matched: 10 |                     |             |             |                                                     |
| Tax_Id=10090 Gene_Symbol=Camk2b Calcium/calmodulin-dependent protein kinase II, beta                        |                             |              |                     |                     |             |             |                                                     |
| 20.                                                                                                         | <a href="#">IPI00119063</a> | Mass: 523342 | Score: 170          | Queries matched: 4  | emPAI: 0.02 |             |                                                     |
| Tax_Id=10090 Gene_Symbol=Lrp1 Prolow-density lipoprotein receptor-related protein 1                         |                             |              |                     |                     |             |             |                                                     |
| Query                                                                                                       | Observed                    | Mr(expt)     | Mr(calc)            | ppm                 | Miss Score  | Expect Rank | Peptide                                             |
| <a href="#">679</a>                                                                                         | 687.8944                    | 1373.7742    | 1373.7667           | 5.50                | 0           | 73          | 2.2e-006 1 R.YVVISQGLDKPR.A <a href="#">680</a>     |
| <a href="#">851</a>                                                                                         | 811.4091                    | 1620.8036    | 1620.8148           | -6.85               | 0           | 75          | 2.2e-006 1 K.AVTDEEPLIFANR.Y                        |
| <a href="#">891</a>                                                                                         | 854.9852                    | 1707.9558    | 1707.9308           | 14.7                | 0           | 51          | 0.00023 1 K.TVLWPNGLSLDIPAGR.L                      |
| 21.                                                                                                         | <a href="#">IPI00136703</a> | Mass: 42971  | Score: 170          | Queries matched: 5  | emPAI: 0.35 |             |                                                     |
| Tax_Id=10090 Gene_Symbol=Ckb Creatine kinase B-type                                                         |                             |              |                     |                     |             |             |                                                     |
| Query                                                                                                       | Observed                    | Mr(expt)     | Mr(calc)            | ppm                 | Miss Score  | Expect Rank | Peptide                                             |
| <a href="#">305</a>                                                                                         | 516.2994                    | 1030.5842    | 1030.5481           | 35.1                | 0           | 15          | 2.4 1 K.LLIEMEQR.L                                  |
| <a href="#">838</a>                                                                                         | 801.9229                    | 1601.8312    | 1601.8260           | 3.25                | 0           | 96          | 1.6e-008 1 K.LAVEALSSLDGDLGR.Y                      |
| <a href="#">863</a>                                                                                         | 828.9160                    | 1655.8174    | 1655.8188           | -0.85               | 0           | 59          | 8.3e-005 1 R.LEQQAIDDLMPAQK.-                       |
| <a href="#">944</a>                                                                                         | 924.9993                    | 1847.9840    | 1847.9703           | 7.44                | 0           | 56          | 0.00012 1 R.LGFSEVELVQMVVDGVK.L                     |
| <a href="#">1075</a>                                                                                        | 897.6848                    | 3586.7101    | 3586.7800           | -19.48              | 0           | 54          | 9.8e-005 1 K.SMTEARQQQLIDHFLFKPVPSPLLASGMAR.D       |
| 22.                                                                                                         | <a href="#">IPI00319602</a> | Mass: 47493  | Score: 159          | Queries matched: 3  | emPAI: 0.14 |             |                                                     |
| Tax_Id=10090 Gene_Symbol=Cnp Isoform CNPII of 2',3'-cyclic-nucleotide 3'-phosphodiesterase                  |                             |              |                     |                     |             |             |                                                     |

| Query               | Observed | Mr(expt)  | Mr(calc)  | ppm  | Miss | Score | Expect   | Rank | Peptide              |
|---------------------|----------|-----------|-----------|------|------|-------|----------|------|----------------------|
| <a href="#">291</a> | 500.7604 | 999.5062  | 999.4808  | 25.5 | 1    | 1     | 57       | 3    | -_MNTSFTRK.S         |
| <a href="#">560</a> | 628.8163 | 1255.6180 | 1255.6157 | 1.89 | 0    | 70    | 6.3e-006 | 1    | K.GGSQGEAVGELPR.G    |
| <a href="#">861</a> | 824.9201 | 1647.8256 | 1647.8216 | 2.45 | 1    | 124   | 2.8e-011 | 1    | K.AAGAEYYAQQEVVVKR.S |

23. [IPI00138892](#) Mass: 15004 Score: 158 Queries matched: 4 emPAI: 0.85

Tax\_Id=10090 Gene\_Symbol=Uba52 Ubiquitin-60S ribosomal protein L40

| Query               | Observed | Mr(expt)  | Mr(calc)  | ppm   | Miss | Score | Expect   | Rank | Peptide                               |
|---------------------|----------|-----------|-----------|-------|------|-------|----------|------|---------------------------------------|
| <a href="#">82</a>  | 648.4186 | 647.4113  | 647.4006  | 16.5  | 0    | 35    | 0.0084   | 1    | R.LIFAGK.Q                            |
| <a href="#">752</a> | 762.3943 | 1522.7740 | 1522.7740 | 0.06  | 1    | 82    | 4e-007   | 1    | K.IQDKEGIPPDQQR.L <a href="#">753</a> |
| <a href="#">921</a> | 894.4671 | 1786.9196 | 1786.9200 | -0.20 | 0    | 82    | 3.7e-007 | 1    | K.TITLEVEPSDTIENVK.A                  |

Proteins matching the same set of peptides:

|                             |                           |                                      |                    |
|-----------------------------|---------------------------|--------------------------------------|--------------------|
| <a href="#">IPI00470152</a> | Mass: 18282               | Score: 158                           | Queries matched: 4 |
| Tax_Id=10090                | Gene_Symbol=Rps27a        | Ubiquitin-40S ribosomal protein S27a |                    |
| <a href="#">IPI00895319</a> | Mass: 22277               | Score: 158                           | Queries matched: 4 |
| Tax_Id=10090                | Gene_Symbol=2810422J05Rik | 22 kDa protein                       |                    |
| <a href="#">IPI00895479</a> | Mass: 27181               | Score: 158                           | Queries matched: 4 |
| Tax_Id=10090                | Gene_Symbol=2810422J05Rik | 27 kDa protein                       |                    |
| <a href="#">IPI00918763</a> | Mass: 11021               | Score: 158                           | Queries matched: 4 |
| Tax_Id=10090                | Gene_Symbol=Uba52         | Ubiquitin subunit 1                  |                    |
| <a href="#">IPI00750889</a> | Mass: 22822               | Score: 158                           | Queries matched: 4 |
| Tax_Id=10090                | Gene_Symbol=Ubc           | Ubc protein                          |                    |
| <a href="#">IPI00923013</a> | Mass: 26603               | Score: 158                           | Queries matched: 4 |
| Tax_Id=10090                | Gene_Symbol=Ubb           | Ubiquitin B                          |                    |
| <a href="#">IPI00923037</a> | Mass: 22578               | Score: 158                           | Queries matched: 4 |
| Tax_Id=10090                | Gene_Symbol=Ubc           | Putative uncharacterized protein     |                    |
| <a href="#">IPI00139518</a> | Mass: 34348               | Score: 158                           | Queries matched: 4 |
| Tax_Id=10090                | Gene_Symbol=Ubb           | Polyubiquitin-B                      |                    |
| <a href="#">IPI00969323</a> | Mass: 82603               | Score: 158                           | Queries matched: 4 |
| Tax_Id=10090                | Gene_Symbol=Ubc           | Polyubiquitin-C                      |                    |
| <a href="#">IPI00755916</a> | Mass: 82614               | Score: 158                           | Queries matched: 4 |
| Tax_Id=10090                | Gene_Symbol=Ubc           | ubiquitin                            |                    |

24. [IPI00323357](#) Mass: 71055 Score: 136 Queries matched: 7 emPAI: 0.09

Tax\_Id=10090 Gene\_Symbol=Hspa8 Heat shock cognate 71 kDa protein

| Query               | Observed | Mr(expt)  | Mr(calc)  | ppm  | Miss | Score | Expect   | Rank | Peptide                               |
|---------------------|----------|-----------|-----------|------|------|-------|----------|------|---------------------------------------|
| <a href="#">464</a> | 590.8160 | 1179.6174 | 1179.6135 | 3.31 | 1    | 25    | 0.25     | 1    | K.VQVEYKGETK.S                        |
| <a href="#">520</a> | 614.8207 | 1227.6268 | 1227.6207 | 4.97 | 0    | 14    |          | 3    | 2 K.VELIANDQGNR.T                     |
| <a href="#">612</a> | 652.3111 | 1302.6076 | 1302.5914 | 12.5 | 0    | 5     |          | 16   | 2 K.NSLESYAFNMK.A                     |
| <a href="#">733</a> | 744.3572 | 1486.6998 | 1486.6940 | 3.93 | 0    | 69    | 7.6e-006 | 1    | R.TTPSYVAFTDTER.L <a href="#">734</a> |
| <a href="#">843</a> | 808.9025 | 1615.7904 | 1615.7804 | 6.25 | 0    | 3     |          | 35   | 2 K.SFYPEEVSSMVLTK.M                  |
| <a href="#">987</a> | 991.5050 | 1980.9954 | 1980.9905 | 2.49 | 0    | 59    | 6.2e-005 | 1    | K.TVTNAVTVPAYFNDSQR.Q                 |

25. [IPI00348094](#) Mass: 51093 Score: 133 Queries matched: 8 emPAI: 0.21

Tax\_Id=10090 Gene\_Symbol=Tubbl1 Tubulin, beta 1

| Query               | Observed | Mr(expt)  | Mr(calc)  | ppm   | Miss | Score | Expect   | Rank | Peptide                                              |
|---------------------|----------|-----------|-----------|-------|------|-------|----------|------|------------------------------------------------------|
| <a href="#">339</a> | 539.2715 | 1076.5284 | 1076.5250 | 3.17  | 1    | 35    | 0.026    | 1    | K.IREEYPDR.I <a href="#">338</a> <a href="#">340</a> |
| <a href="#">409</a> | 572.3189 | 1142.6232 | 1142.6270 | -3.31 | 0    | (64)  | 3.3e-005 | 1    | K.LAVNMVFPFR.L <a href="#">410</a>                   |
| <a href="#">431</a> | 580.3211 | 1158.6276 | 1158.6219 | 4.92  | 0    | 83    | 4.5e-007 | 1    | K.LAVNMVFPFR.L                                       |
| <a href="#">632</a> | 660.3535 | 1318.6924 | 1318.6955 | -2.31 | 0    | 11    |          | 6.1  | 2 R.ILNSFSVMPSPK.V <a href="#">633</a>               |

26. [IPI00608020](#) Mass: 20817 Score: 116 Queries matched: 2 emPAI: 0.35

Tax\_Id=10090 Gene\_Symbol=Ftl1 ferritin light chain 1

| Query                | Observed | Mr(expt)  | Mr(calc)  | ppm   | Miss | Score | Expect   | Rank | Peptide                          |
|----------------------|----------|-----------|-----------|-------|------|-------|----------|------|----------------------------------|
| <a href="#">730</a>  | 740.8624 | 1479.7102 | 1479.6954 | 10.1  | 0    | 87    | 1.2e-007 | 1    | R.QNYSTEVEAAVNR.L                |
| <a href="#">1071</a> | 820.6419 | 3278.5385 | 3278.5587 | -6.17 | 1    | 62    | 1.9e-005 | 1    | R.ALFQDVQKPSQDEWGKTQEAMEALAMEK.N |

Proteins matching the same set of peptides:

|                             |                  |                        |                    |
|-----------------------------|------------------|------------------------|--------------------|
| <a href="#">IPI00762203</a> | Mass: 20847      | Score: 116             | Queries matched: 2 |
| Tax_Id=10090                | Gene_Symbol=Ftl1 | Ferritin light chain 1 |                    |

27. [IPI00136372](#) Mass: 70163 Score: 94 Queries matched: 5 emPAI: 0.10

Tax\_Id=10090 Gene\_Symbol=Synl1 Isoform Ib of Synapsin-1

| Query               | Observed | Mr(expt)  | Mr(calc)  | ppm    | Miss | Score | Expect  | Rank | Peptide                              |
|---------------------|----------|-----------|-----------|--------|------|-------|---------|------|--------------------------------------|
| <a href="#">238</a> | 450.2198 | 898.4250  | 898.4621  | -41.20 | 0    | 6     |         | 11   | 2 R.QAGAPQATR.Q                      |
| <a href="#">470</a> | 594.3597 | 1186.7048 | 1186.7074 | -2.14  | 0    | 24    | 0.15    | 1    | R.SLKPDFVLIR.Q                       |
| <a href="#">639</a> | 663.8334 | 1325.6522 | 1325.6503 | 1.46   | 0    | 57    | 0.00014 | 1    | K.TYATAEPPIDAK.Y <a href="#">640</a> |
| <a href="#">897</a> | 862.9027 | 1723.7908 | 1723.7869 | 2.29   | 0    | 47    | 0.00094 | 1    | K.TNTGSAMLEQIAMSDR.Y                 |

Proteins matching the same set of peptides:

|                             |                   |                          |                    |
|-----------------------------|-------------------|--------------------------|--------------------|
| <a href="#">IPI00649467</a> | Mass: 71610       | Score: 94                | Queries matched: 5 |
| Tax_Id=10090                | Gene_Symbol=Synl1 | Isoform 3 of Synapsin-1  |                    |
| <a href="#">IPI00649886</a> | Mass: 74223       | Score: 94                | Queries matched: 5 |
| Tax_Id=10090                | Gene_Symbol=Synl1 | Isoform Ia of Synapsin-1 |                    |

28. [IPI00555023](#) Mass: 23765 Score: 91 Queries matched: 2 emPAI: 0.14

Tax\_Id=10090 Gene\_Symbol=Gstpl1 Glutathione S-transferase P 1

| Query               | Observed | Mr(expt)  | Mr(calc)  | ppm  | Miss | Score | Expect   | Rank | Peptide                             |
|---------------------|----------|-----------|-----------|------|------|-------|----------|------|-------------------------------------|
| <a href="#">662</a> | 676.3783 | 1350.7420 | 1350.7336 | 6.25 | 0    | 70    | 5.6e-006 | 1    | M.PPYTIVYFPVR.G <a href="#">661</a> |

29. [IPI00114375](#) Mass: 62638 Score: 88 Queries matched: 1 emPAI: 0.05

Tax\_Id=10090 Gene\_Symbol=Dpysl2 Dihydropyrimidinase-related protein 2

| Query               | Observed | Mr(expt)  | Mr(calc)  | ppm  | Miss | Score | Expect   | Rank | Peptide              |
|---------------------|----------|-----------|-----------|------|------|-------|----------|------|----------------------|
| <a href="#">967</a> | 956.0165 | 1910.0184 | 1910.0149 | 1.85 | 0    | 88    | 7.4e-008 | 1    | R.FQLTDSQIYEVLSVIR.D |

30. [IPI00652902](#) Mass: 41033 Score: 88 Queries matched: 2 emPAI: 0.17  
 Tax\_Id=10090 Gene\_Symbol=Gnai2 Putative uncharacterized protein

| Query               | Observed | Mr(expt)  | Mr(calc)  | ppm   | Miss | Score | Expect   | Rank | Peptide              |
|---------------------|----------|-----------|-----------|-------|------|-------|----------|------|----------------------|
| <a href="#">329</a> | 529.3133 | 1056.6120 | 1056.6179 | -5.53 | 0    | 72    | 4.1e-006 | 1    | K.LLLLGAGESGK.S      |
| <a href="#">902</a> | 868.9853 | 1735.9560 | 1735.9542 | 1.05  | 0    | 50    | 0.00034  | 1    | R.AVVYSNTIQSIMAIVK.A |

31. [IPI00114642](#) Mass: 13928 Score: 77 Queries matched: 2 emPAI: 0.25  
 Tax\_Id=10090 Gene\_Symbol=Hist1h2bn;Hist1h2bl;Hist1h2bj;Hist1h2bf Histone H2B type 1-F/J/L

| Query               | Observed | Mr(expt)  | Mr(calc)  | ppm   | Miss | Score | Expect   | Rank | Peptide                                 |
|---------------------|----------|-----------|-----------|-------|------|-------|----------|------|-----------------------------------------|
| <a href="#">903</a> | 872.4119 | 1742.8092 | 1742.8120 | -1.58 | 0    | 75    | 1.9e-006 | 1    | K.AMGIMNSFVNDIFER.I <a href="#">904</a> |

Proteins matching the same set of peptides:

|                             |                                                     |                                   |                    |
|-----------------------------|-----------------------------------------------------|-----------------------------------|--------------------|
| <a href="#">IPI00124518</a> | Mass: 13359                                         | Score: 77                         | Queries matched: 2 |
| Tax_Id=10090                | Gene_Symbol=Hist2h2bb                               | Hist2h2bb                         | protein            |
| <a href="#">IPI00134534</a> | Mass: 14879                                         | Score: 77                         | Queries matched: 2 |
| Tax_Id=10090                | Gene_Symbol=Gml1277;Gml13646                        | Histone H2B                       |                    |
| <a href="#">IPI00187543</a> | Mass: 13985                                         | Score: 77                         | Queries matched: 2 |
| Tax_Id=10090                | Gene_Symbol=Hist2h2be                               | Histone H2B type 2-E              |                    |
| <a href="#">IPI00227930</a> | Mass: 13912                                         | Score: 77                         | Queries matched: 2 |
| Tax_Id=10090                | Gene_Symbol=Hist1h2bh                               | Histone H2B type 1-H              |                    |
| <a href="#">IPI00229539</a> | Mass: 17248                                         | Score: 77                         | Queries matched: 2 |
| Tax_Id=10090                | Gene_Symbol=Hist3h2bb-ps                            | histone H2B type 3-B              |                    |
| <a href="#">IPI00265768</a> | Mass: 13912                                         | Score: 77                         | Queries matched: 2 |
| Tax_Id=10090                | Gene_Symbol=Hist1h2bk                               | Histone H2B type 1-K              |                    |
| <a href="#">IPI00282266</a> | Mass: 13898                                         | Score: 77                         | Queries matched: 2 |
| Tax_Id=10090                | Gene_Symbol=Hist1h2bg;Hist1h2be;Gm9998;Hist1h2bc    | Histone H2B type 1-C/E/G          |                    |
| <a href="#">IPI00282269</a> | Mass: 13928                                         | Score: 77                         | Queries matched: 2 |
| Tax_Id=10090                | Gene_Symbol=Hist1h2bm                               | Histone H2B type 1-M              |                    |
| <a href="#">IPI00348270</a> | Mass: 13912                                         | Score: 77                         | Queries matched: 2 |
| Tax_Id=10090                | Gene_Symbol=Hist2h2bb                               | Histone H2B type 2-B              |                    |
| <a href="#">IPI00453744</a> | Mass: 15968                                         | Score: 77                         | Queries matched: 2 |
| Tax_Id=10090                | Gene_Symbol=Hist1h2bp                               | 16 kDa protein                    |                    |
| <a href="#">IPI00461514</a> | Mass: 14987                                         | Score: 77                         | Queries matched: 2 |
| Tax_Id=10090                | Gene_Symbol=Gml13646                                | Histone H2B                       |                    |
| <a href="#">IPI00553774</a> | Mass: 13986                                         | Score: 77                         | Queries matched: 2 |
| Tax_Id=10090                | Gene_Symbol=Hist3h2ba                               | Histone H2B type 3-A              |                    |
| <a href="#">IPI00554853</a> | Mass: 13944                                         | Score: 77                         | Queries matched: 2 |
| Tax_Id=10090                | Gene_Symbol=Hist1h2bb                               | Histone H2B type 1-B              |                    |
| <a href="#">IPI00648991</a> | Mass: 13984                                         | Score: 77                         | Queries matched: 2 |
| Tax_Id=10090                | Gene_Symbol=Hist1h2bp                               | Isoform 1 of Histone H2B type 1-P |                    |
| <a href="#">IPI00761713</a> | Mass: 15555                                         | Score: 77                         | Queries matched: 2 |
| Tax_Id=10090                | Gene_Symbol=Hist1h2bp                               | Isoform 2 of Histone H2B type 1-P |                    |
| <a href="#">IPI00874492</a> | Mass: 14746                                         | Score: 77                         | Queries matched: 2 |
| Tax_Id=10090                | Gene_Symbol=Hist1h2bm                               | 15 kDa protein                    |                    |
| <a href="#">IPI00874654</a> | Mass: 14787                                         | Score: 77                         | Queries matched: 2 |
| Tax_Id=10090                | Gene_Symbol=Hist1h2bg;Hist1h2be;Gm9998;Hist1h2bc    | Histone H2B                       |                    |
| <a href="#">IPI00874970</a> | Mass: 14951                                         | Score: 77                         | Queries matched: 2 |
| Tax_Id=10090                | Gene_Symbol=Hist1h2bn;Hist1h2bl;Hist1h2bj;Hist1h2bf | Histone H2B                       |                    |
| <a href="#">IPI00875277</a> | Mass: 14242                                         | Score: 77                         | Queries matched: 2 |
| Tax_Id=10090                | Gene_Symbol=Hist1h2bk                               | 14 kDa protein                    |                    |
| <a href="#">IPI00875523</a> | Mass: 14900                                         | Score: 77                         | Queries matched: 2 |
| Tax_Id=10090                | Gene_Symbol=Hist1h2bh                               | Histone H2B                       |                    |
| <a href="#">IPI00875901</a> | Mass: 14806                                         | Score: 77                         | Queries matched: 2 |
| Tax_Id=10090                | Gene_Symbol=Hist1h2bk                               | Histone H2B                       |                    |
| <a href="#">IPI00876167</a> | Mass: 14126                                         | Score: 77                         | Queries matched: 2 |
| Tax_Id=10090                | Gene_Symbol=Hist1h2bn;Hist1h2bl;Hist1h2bj;Hist1h2bf | 14 kDa protein                    |                    |
| <a href="#">IPI00876432</a> | Mass: 14148                                         | Score: 77                         | Queries matched: 2 |
| Tax_Id=10090                | Gene_Symbol=Hist1h2bn;Hist1h2bl;Hist1h2bj;Hist1h2bf | Histone H2B                       |                    |
| <a href="#">IPI00876549</a> | Mass: 14902                                         | Score: 77                         | Queries matched: 2 |
| Tax_Id=10090                | Gene_Symbol=Hist1h2bn;Hist1h2bl;Hist1h2bj;Hist1h2bf | Histone H2B                       |                    |
| <a href="#">IPI00876550</a> | Mass: 14812                                         | Score: 77                         | Queries matched: 2 |
| Tax_Id=10090                | Gene_Symbol=-                                       | 15 kDa protein                    |                    |

32. [IPI00118569](#) Mass: 44369 Score: 72 Queries matched: 1 emPAI: 0.07  
 Tax\_Id=10090 Gene\_Symbol=Gnai3 Guanine nucleotide-binding protein subunit alpha-13

| Query               | Observed | Mr(expt)  | Mr(calc)  | ppm   | Miss | Score | Expect   | Rank | Peptide         |
|---------------------|----------|-----------|-----------|-------|------|-------|----------|------|-----------------|
| <a href="#">329</a> | 529.3133 | 1056.6120 | 1056.6179 | -5.53 | 0    | 72    | 4.1e-006 | 1    | K.LLLLGAGESGK.S |

Proteins matching the same set of peptides:

|                             |                   |                                                     |                    |
|-----------------------------|-------------------|-----------------------------------------------------|--------------------|
| <a href="#">IPI00230191</a> | Mass: 44238       | Score: 72                                           | Queries matched: 1 |
| Tax_Id=10090                | Gene_Symbol=Gnai2 | Guanine nucleotide-binding protein subunit alpha-12 |                    |
| <a href="#">IPI00649388</a> | Mass: 20095       | Score: 72                                           | Queries matched: 1 |
| Tax_Id=10090                | Gene_Symbol=Gnai3 | Putative uncharacterized protein                    |                    |

33. [IPI00310091](#) Mass: 66079 Score: 72 Queries matched: 1 emPAI: 0.05  
 Tax\_Id=10090 Gene\_Symbol=Ppp2r1a Serine/threonine-protein phosphatase 2A 65 kDa regulatory subunit A alpha isoform

| Query                | Observed | Mr(expt)  | Mr(calc)  | ppm   | Miss | Score | Expect   | Rank | Peptide                  |
|----------------------|----------|-----------|-----------|-------|------|-------|----------|------|--------------------------|
| <a href="#">1008</a> | 732.0782 | 2193.2128 | 2193.2256 | -5.86 | 0    | 72    | 1.5e-006 | 1    | K.IGPILDNSTLQSEVKPILEK.L |

34. [IPI00130280](#) Mass: 59830 Score: 72 Queries matched: 1 emPAI: 0.05  
 Tax\_Id=10090 Gene\_Symbol=Atp5a1 ATP synthase subunit alpha, mitochondrial

| Query | Observed | Mr(expt) | Mr(calc) | ppm | Miss | Score | Expect | Rank | Peptide |
|-------|----------|----------|----------|-----|------|-------|--------|------|---------|
|-------|----------|----------|----------|-----|------|-------|--------|------|---------|

[1023](#) 1169.5824 2337.1502 2337.1601 -4.21 0 72 2.9e-006 1 R.EVAFAQFGSDLDAAATQQLLSR.G

Proteins matching the same set of peptides:

[IPI00857439](#) Mass: 54675 Score: 72 Queries matched: 1  
Tax\_Id=10090 Gene\_Symbol=Atp5a1 ATP synthase subunit alpha

35. [IPI00625729](#) Mass: 66079 Score: 70 Queries matched: 3 emPAI: 0.05  
Tax\_Id=10090 Gene\_Symbol=Krt1 Keratin, type II cytoskeletal 1  
Query Observed Mr(expt) Mr(calc) ppm Miss Score Expect Rank Peptide  
[694](#) 697.3569 1392.6992 1392.7249 -18.40 1 0 75 8 R.TNAENEFVTIKK.D  
[728](#) 738.4001 1474.7856 1474.7780 5.20 0 70 6.4e-006 1 R.FLEQQNQVLQTK.W  
[880](#) 849.4527 1696.8908 1696.8342 33.4 1 3 28 4 K.DVDSAYMTKVELQAK.A

36. [IPI00462140](#) Mass: 61379 Score: 70 Queries matched: 2 emPAI: 0.05  
Tax\_Id=10090 Gene\_Symbol=Krt77 Keratin, type II cytoskeletal 1b  
Query Observed Mr(expt) Mr(calc) ppm Miss Score Expect Rank Peptide  
[681](#) 689.3424 1376.6702 1376.7300 -43.38 1 1 65 9 R.TNAENDFVVLKK.D  
[728](#) 738.4001 1474.7856 1474.7780 5.20 0 70 6.4e-006 1 R.FLEQQNQVLQTK.W

37. [IPI00408378](#) Mass: 28046 Score: 69 Queries matched: 1 emPAI: 0.12  
Tax\_Id=10090 Gene\_Symbol=Ywhaq Isoform 1 of 14-3-3 protein theta  
Query Observed Mr(expt) Mr(calc) ppm Miss Score Expect Rank Peptide  
[755](#) 766.8602 1531.7058 1531.7114 -3.62 0 69 7.3e-006 1 K.AVTEQQAEALSNEER.N

Proteins matching the same set of peptides:

[IPI00656269](#) Mass: 28025 Score: 69 Queries matched: 1  
Tax\_Id=10090 Gene\_Symbol=Ywhaq Isoform 2 of 14-3-3 protein theta  
[IPI00754545](#) Mass: 35930 Score: 69 Queries matched: 1  
Tax\_Id=10090 Gene\_Symbol=Gm2423 similar to Ywhaq protein  
[IPI00853924](#) Mass: 34613 Score: 69 Queries matched: 1  
Tax\_Id=10090 Gene\_Symbol=Ywhaq 34 kDa protein

38. [IPI00119067](#) Mass: 23731 Score: 68 Queries matched: 1 emPAI: 0.14  
Tax\_Id=10090 Gene\_Symbol=Tppp Tubulin polymerization-promoting protein  
Query Observed Mr(expt) Mr(calc) ppm Miss Score Expect Rank Peptide  
[964](#) 948.9969 1895.9792 1895.9516 14.6 0 68 1.1e-005 1 R.TITFEQFQEALEELAK.K

39. [IPI00323571](#) Mass: 35901 Score: 67 Queries matched: 5 emPAI: 0.30  
Tax\_Id=10090 Gene\_Symbol=Apoe Apolipoprotein E  
Query Observed Mr(expt) Mr(calc) ppm Miss Score Expect Rank Peptide  
[448](#) 585.8325 1169.6504 1169.6516 -1.02 1 43 0.0027 1 R.LGKVEVQAQAR.L [447](#)  
[520](#) 614.8207 1227.6268 1227.6320 -4.17 1 45 0.0025 1 R.GRLLEEVEVGNQAR.D  
[681](#) 689.3424 1376.6702 1376.6718 -1.12 1 36 0.021 1 R.SKMEEQTQIIR.L  
[749](#) 755.9105 1509.8064 1509.8012 3.50 1 6 14 1 R.TANLGAQAQPLRDR.A

40. [IPI00272878](#) Mass: 98140 Score: 66 Queries matched: 2 emPAI: 0.03  
Tax\_Id=10090 Gene\_Symbol=Dnm1 Isoform 1 of Dynamin-1  
Query Observed Mr(expt) Mr(calc) ppm Miss Score Expect Rank Peptide  
[328](#) 529.2714 1056.5282 1056.5200 7.82 0 6 15 1 R.SPTSSPTPQR.R  
[657](#) 672.8652 1343.7158 1343.7045 8.46 0 66 1.4e-005 1 K.TSGNQDEILVIR.K

Proteins matching the same set of peptides:

[IPI00331293](#) Mass: 97762 Score: 66 Queries matched: 2  
Tax\_Id=10090 Gene\_Symbol=Dnm1 Isoform 4 of Dynamin-1  
[IPI00465648](#) Mass: 96209 Score: 66 Queries matched: 2  
Tax\_Id=10090 Gene\_Symbol=Dnm1 Isoform 3 of Dynamin-1  
[IPI00753037](#) Mass: 96395 Score: 66 Queries matched: 2  
Tax\_Id=10090 Gene\_Symbol=Dnm1 Isoform 5 of Dynamin-1  
[IPI00890133](#) Mass: 97954 Score: 66 Queries matched: 2  
Tax\_Id=10090 Gene\_Symbol=Dnm1 Uncharacterized protein

41. [IPI00230145](#) Mass: 21224 Score: 62 Queries matched: 3 emPAI: 0.16  
Tax\_Id=10090 Gene\_Symbol=Fth1 Ferritin heavy chain  
Query Observed Mr(expt) Mr(calc) ppm Miss Score Expect Rank Peptide  
[422](#) 577.3004 1152.5862 1152.5887 -2.15 0 11 6 1 K.ELGDHVTNLR.K  
[571](#) 634.3499 1266.6852 1266.6932 -6.26 0 59 7.2e-005 1 K.SVNQSLLELHK.L [572](#)

42. [IPI00123313](#) Mass: 118931 Score: 62 Queries matched: 1 emPAI: 0.03  
Tax\_Id=10090 Gene\_Symbol=Ubal Ubiquitin-like modifier-activating enzyme 1  
Query Observed Mr(expt) Mr(calc) ppm Miss Score Expect Rank Peptide  
[962](#) 943.0261 1884.0376 1884.0357 1.06 0 62 2.1e-005 1 R.AAVASLLQSVQVPEFTPK.S

43. [IPI00131366](#) Mass: 60627 Score: 61 Queries matched: 4 emPAI: 0.05  
Tax\_Id=10090 Gene\_Symbol=Krt6b Keratin, type II cytoskeletal 6B  
Query Observed Mr(expt) Mr(calc) ppm Miss Score Expect Rank Peptide  
[610](#) 651.8621 1301.7096 1301.7078 1.40 0 61 4.7e-005 1 R.SLDLDSIIAEVK.A  
[705](#) 717.8544 1433.6942 1433.7375 -30.17 1 0 57 3 R.GYSASSARVPLNLR.S  
[880](#) 849.4527 1696.8908 1696.8342 33.4 1 3 28 4 K.DVDAAYMTKVELQAK.A [879](#)

Proteins matching the same set of peptides:

[IPI00785403](#) Mass: 59832 Score: 61 Queries matched: 4  
Tax\_Id=10090 Gene\_Symbol=Krt6b keratin, type II cytoskeletal 6B

44. [IPI00462072](#) Mass: 47453 Score: 60 Queries matched: 2 emPAI: 0.07  
 Tax\_Id=10090 Gene\_Symbol=Eno1;Gm5506 Alpha-enolase  
 Query Observed Mr(expt) Mr(calc) ppm Miss Score Expect Rank Peptide  
[706](#) 720.3782 1438.7418 1438.7344 5.19 0 60 7.3e-005 1 R.YITPDQLADLYK.S  
[1062](#) 990.7887 2969.3443 2969.3508 -2.21 0 14 0.96 1 K.SFVQNYPVVSIEDPFDQDDWGAWQK.F

Proteins matching the same set of peptides:

[IPI00648821](#) Mass: 40099 Score: 60 Queries matched: 2  
 Tax\_Id=10090 Gene\_Symbol=Eno1 Enolase

45. [IPI00266188](#) Mass: 18812 Score: 58 Queries matched: 2 emPAI: 0.18  
 Tax\_Id=10090 Gene\_Symbol=Cfl12 Cofilin-2  
 Query Observed Mr(expt) Mr(calc) ppm Miss Score Expect Rank Peptide  
[651](#) 669.3212 1336.6278 1336.6187 6.87 0 54 0.00022 1 R.YALYDATYETK.E [650](#)

Proteins matching the same set of peptides:

[IPI00407543](#) Mass: 25293 Score: 58 Queries matched: 2  
 Tax\_Id=10090 Gene\_Symbol=Cfl11 Putative uncharacterized protein  
[IPI00848816](#) Mass: 18731 Score: 58 Queries matched: 2  
 Tax\_Id=10090 Gene\_Symbol=LOC100048522 similar to Cofilin-1  
[IPI00890117](#) Mass: 18776 Score: 58 Queries matched: 2  
 Tax\_Id=10090 Gene\_Symbol=Cfl11 Cofilin-1

46. [IPI00230680](#) Mass: 115702 Score: 57 Queries matched: 2 emPAI: 0.03  
 Tax\_Id=10090 Gene\_Symbol=Atp4a Potassium-transporting ATPase alpha chain 1  
 Query Observed Mr(expt) Mr(calc) ppm Miss Score Expect Rank Peptide  
[327](#) 528.2854 1054.5562 1054.5520 4.07 1 18 1.1 1 K.GGDRVPADIR.I  
[685](#) 691.3808 1380.7470 1380.7435 2.55 0 57 0.00012 1 R.VIMVTGDHPITAK.A

47. [IPI00268145](#) Mass: 115394 Score: 57 Queries matched: 3 emPAI: 0.03  
 Tax\_Id=10090 Gene\_Symbol=Atp12a Potassium-transporting ATPase alpha chain 2  
 Query Observed Mr(expt) Mr(calc) ppm Miss Score Expect Rank Peptide  
[447](#) 585.8287 1169.6428 1169.6516 -7.52 1 11 4.9 2 R.NIAVEQVKNR.E [448](#)  
[685](#) 691.3808 1380.7470 1380.7435 2.55 0 57 0.00012 1 K.VIMVTGDHPITAK.A

Proteins matching the same set of peptides:

[IPI00877215](#) Mass: 115395 Score: 57 Queries matched: 3  
 Tax\_Id=10090 Gene\_Symbol=Atp12a potassium-transporting ATPase alpha chain 2

48. [IPI00222632](#) Mass: 21791 Score: 52 Queries matched: 1 emPAI: 0.15  
 Tax\_Id=10090 Gene\_Symbol=Rab31 ras-related protein Rab-31  
 Query Observed Mr(expt) Mr(calc) ppm Miss Score Expect Rank Peptide  
[839](#) 802.4271 1602.8396 1602.8365 1.94 0 52 0.00043 1 K.NAINIEELFQGISR.Q

49. [IPI00755181](#) Mass: 57178 Score: 49 Queries matched: 1 emPAI: 0.06  
 Tax\_Id=10090 Gene\_Symbol=Krt10 keratin, type I cytoskeletal 10  
 Query Observed Mr(expt) Mr(calc) ppm Miss Score Expect Rank Peptide  
[683](#) 691.3288 1380.6430 1380.6408 1.60 0 49 0.00076 1 R.ALEESNYELEGK.I

Proteins matching the same set of peptides:

[IPI00798492](#) Mass: 57906 Score: 49 Queries matched: 1  
 Tax\_Id=10090 Gene\_Symbol=Krt10 Isoform 1 of Keratin, type I cytoskeletal 10  
[IPI00828744](#) Mass: 57197 Score: 49 Queries matched: 1  
 Tax\_Id=10090 Gene\_Symbol=Krt10 Isoform 2 of Keratin, type I cytoskeletal 10

50. [IPI00134492](#) Mass: 52818 Score: 47 Queries matched: 2 emPAI: 0.13  
 Tax\_Id=10090 Gene\_Symbol=Syn2 Isoform IIb of Synapsin-2  
 Query Observed Mr(expt) Mr(calc) ppm Miss Score Expect Rank Peptide  
[726](#) 737.4225 1472.8304 1472.8313 -0.57 0 29 0.051 1 R.EMLTLTPFPVVK.I  
[897](#) 862.9027 1723.7908 1723.7869 2.29 0 47 0.00094 1 K.TNTGSAMLEQIAMSADR.Y

Proteins matching the same set of peptides:

[IPI00469548](#) Mass: 63618 Score: 47 Queries matched: 2  
 Tax\_Id=10090 Gene\_Symbol=Syn2 Isoform IIa of Synapsin-2

51. [IPI00415402](#) Mass: 67925 Score: 47 Queries matched: 1 emPAI: 0.05  
 Tax\_Id=10090 Gene\_Symbol=Stxbp1 Isoform 1 of Syntaxin-binding protein 1  
 Query Observed Mr(expt) Mr(calc) ppm Miss Score Expect Rank Peptide  
[516](#) 612.8163 1223.6180 1223.6146 2.82 0 47 0.0014 1 R.ISEQTYQLSR.W

Proteins matching the same set of peptides:

[IPI00415403](#) Mass: 69091 Score: 47 Queries matched: 1  
 Tax\_Id=10090 Gene\_Symbol=Stxbp1 Isoform 2 of Syntaxin-binding protein 1  
[IPI00756061](#) Mass: 49457 Score: 47 Queries matched: 1  
 Tax\_Id=10090 Gene\_Symbol=Stxbp1 49 kDa protein

52. [IPI00656325](#) Mass: 83131 Score: 45 Queries matched: 2 emPAI: 0.04  
 Tax\_Id=10090 Gene\_Symbol=Nsf Vesicle-fusing ATPase  
 Query Observed Mr(expt) Mr(calc) ppm Miss Score Expect Rank Peptide  
[712](#) 729.3977 1456.7808 1456.7773 2.42 0 45 0.0018 1 R.VLDDGELLVQQT.K.N [711](#)

Proteins matching the same set of peptides:

[IPI00876255](#) Mass: 83174 Score: 45 Queries matched: 2  
Tax\_Id=10090 Gene\_Symbol=Nsf 83 kDa protein

---

53. [IPI00135106](#) Mass: 19584 Score: 41 Queries matched: 4 emPAI: 0.37  
Tax\_Id=10090 Gene\_Symbol=Mobp Isoform 1 of Myelin-associated oligodendrocyte basic protein

| Query               | Observed | Mr(expt)  | Mr(calc)  | ppm   | Miss | Score | Expect | Rank | Peptide                             |
|---------------------|----------|-----------|-----------|-------|------|-------|--------|------|-------------------------------------|
| <a href="#">377</a> | 557.8031 | 1113.5916 | 1113.5891 | 2.32  | 1    | 33    | 0.041  | 1    | <a href="#">R.SSPLRGPGTSR.G 378</a> |
| <a href="#">433</a> | 580.8276 | 1159.6406 | 1159.6462 | -4.78 | 0    | 38    | 0.011  | 1    | <a href="#">K.HQPAASPVVVR.A 434</a> |

---

Mascot: <http://www.matrixscience.com/>



## Mascot Search Results

**User** : Dominic  
**Email** : dominic.kurian@bbsrc.ac.uk  
**Search title** : IPI Mouse\_15-02-2010  
**MS data file** : D:\Peaklist\Dominic Kurian\QtofDK20010803 GATC P 0010881.pk1  
**Database** : IPI\_mouse MOUSE\_v3\_79 (54943 sequences; 24917557 residues)  
**Timestamp** : 15 Feb 2011 at 15:10:35 GMT  
**Protein hits** :

- [IPI00420725](#) Tax\_Id=10090 Gene\_Symbol=Camk2a Uncharacterized protein
- [IPI00474502](#) Tax\_Id=10090 Gene\_Symbol=Camk2b Calcium/calmodulin-dependent protein kinase type II subunit beta
- [IPI00112584](#) Tax\_Id=10090 Gene\_Symbol=Camk2d Isoform 1 of Calcium/calmodulin-dependent protein kinase type II subunit
- [IPI00124695](#) Tax\_Id=10090 Gene\_Symbol=Camk2g Isoform 1 of Calcium/calmodulin-dependent protein kinase type II subunit
- [IPI00109073](#) Tax\_Id=10090 Gene\_Symbol=Tubb4 Tubulin beta-4 chain
- [IPI00115546](#) Tax\_Id=10090 Gene\_Symbol=Gnao1 Isoform Alpha-2 of Guanine nucleotide-binding protein G(o) subunit alpha
- [IPI00323571](#) Tax\_Id=10090 Gene\_Symbol=ApoE Apolipoprotein E
- [IPI00112251](#) Tax\_Id=10090 Gene\_Symbol=Tubb3 Tubulin beta-3 chain
- [IPI00110850](#) Tax\_Id=10090 Gene\_Symbol=Actb Actin, cytoplasmic 1
- [IPI00109061](#) Tax\_Id=10090 Gene\_Symbol=Tubb2b Tubulin beta-2B chain
- [IPI00122048](#) Tax\_Id=10090 Gene\_Symbol=Atpla3 Sodium/potassium-transporting ATPase subunit alpha-3
- [IPI00138892](#) Tax\_Id=10090 Gene\_Symbol=Uba52 Ubiquitin-60S ribosomal protein L40
- [IPI00120793](#) Tax\_Id=10090 Gene\_Symbol=Prnp Major prion protein
- [IPI00122928](#) Tax\_Id=10090 Gene\_Symbol=Tubb6 Tubulin beta-6 chain
- [IPI00225062](#) Tax\_Id=10090 Gene\_Symbol=Srrm2 Isoform 3 of Serine/arginine repetitive matrix protein 2
- [IPI00221528](#) Tax\_Id=10090 Gene\_Symbol=Actb12 Beta-actin-like protein 2
- [IPI00404590](#) Tax\_Id=10090 Gene\_Symbol=Hlf0 Putative uncharacterized protein
- [IPI00323357](#) Tax\_Id=10090 Gene\_Symbol=Hspa8 Heat shock cognate 71 kDa protein
- [IPI00469012](#) Tax\_Id=10090 Gene\_Symbol=Tbcl10b TBC1 domain family member 10B
- [IPI00223714](#) Tax\_Id=10090 Gene\_Symbol=Hist1hle Histone H1.4
- [IPI00656325](#) Tax\_Id=10090 Gene\_Symbol=Nsf Vesicle-fusing ATPase
- [IPI00377681](#) Tax\_Id=10090 Gene\_Symbol=N28178 Isoform 2 of Protein KIAA1045
- [IPI00122069](#) Tax\_Id=10090 Gene\_Symbol=Prkcc Protein kinase C gamma type
- [IPI00136703](#) Tax\_Id=10090 Gene\_Symbol=Ckb Creatine kinase B-type
- [IPI00347110](#) Tax\_Id=10090 Gene\_Symbol=Krt73 Keratin, type II cytoskeletal 73
- [IPI00403219](#) Tax\_Id=10090 Gene\_Symbol=Gml4496 Novel vomeronasal 2, receptor family protein
- [IPI00119853](#) Tax\_Id=10090 Gene\_Symbol=Gnas Isoform Gnas-1 of Guanine nucleotide-binding protein G(s) subunit alpha is
- [IPI00347770](#) Tax\_Id=10090 Gene\_Symbol=Gnat3 Guanine nucleotide-binding protein G(t) subunit alpha-3
- [IPI00118569](#) Tax\_Id=10090 Gene\_Symbol=Gna13 Guanine nucleotide-binding protein subunit alpha-13
- [IPI00123176](#) Tax\_Id=10090 Gene\_Symbol=Gm6316 Glycerinaldehyde-3-phosphate dehydrogenase
- [IPI00348094](#) Tax\_Id=10090 Gene\_Symbol=Tubb1 Tubulin, beta 1
- [IPI00116074](#) Tax\_Id=10090 Gene\_Symbol=Aco2 Aconitate hydratase, mitochondrial
- [IPI00119063](#) Tax\_Id=10090 Gene\_Symbol=Lrp1 Prolow-density lipoprotein receptor-related protein 1

### IPI\_mouse [Decoy](#) False discovery rate

|                                                      |     |   |        |
|------------------------------------------------------|-----|---|--------|
| Peptide matches above identity threshold             | 161 | 0 | 0.00 % |
| Peptide matches above homology or identity threshold | 181 | 0 | 0.00 % |

### Probability Based Mowse Score

Ions score is  $-10 \cdot \log(P)$ , where P is the probability that the observed match is a random event.  
 Individual ions scores  $> 37$  indicate identity or extensive homology ( $p < 0.01$ ).  
 Protein scores are derived from ions scores as a non-probabilistic basis for ranking protein hits.

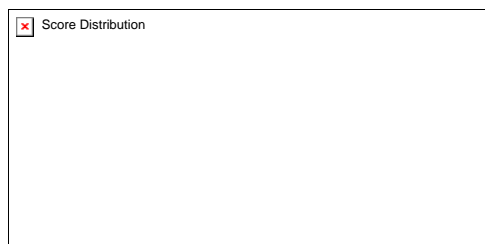

### Peptide Summary Report

Format As  [Help](#)  
 Significance threshold  $p < 0.01$  Max. number of hits   
 Standard scoring  MudPIT scoring  Ions score or expect cut-off  Show sub-sets   
 Show pop-ups  Suppress pop-ups  Sort unassigned   Require bold red   
    Error tolerant

1. [IPI00420725](#) Mass: 55882 Score: 1434 Queries matched: 119 emPAI: 0.99  
 Tax\_Id=10090 Gene\_Symbol=Camk2a Uncharacterized protein  
 Check to include this hit in error tolerant search or archive report

| Query                                                   | Observed | Mr (expt) | Mr (calc) | ppm   | Miss | Score | Expect | Rank | Peptide       |
|---------------------------------------------------------|----------|-----------|-----------|-------|------|-------|--------|------|---------------|
| <input checked="" type="checkbox"/> <a href="#">33</a>  | 602.3627 | 601.3554  | 601.3435  | 19.8  | 0    | 20    | 1.6    | 1    | K.DLINK.M     |
| <input checked="" type="checkbox"/> <a href="#">81</a>  | 432.7283 | 863.4420  | 863.4501  | -9.35 | 0    | (7)   | 20     | 1    | R.SGAPSVLPH.- |
| <input checked="" type="checkbox"/> <a href="#">82</a>  | 432.7314 | 863.4482  | 863.4501  | -2.17 | 0    | (12)  | 6.1    | 1    | R.SGAPSVLPH.- |
| <input checked="" type="checkbox"/> <a href="#">83</a>  | 432.7319 | 863.4492  | 863.4501  | -1.01 | 0    | 20    | 0.94   | 1    | R.SGAPSVLPH.- |
| <input checked="" type="checkbox"/> <a href="#">118</a> | 452.2494 | 902.4842  | 902.4895  | -5.84 | 0    | (13)  | 5.2    | 1    | K.MLTINPSK.R  |

|     |          |           |           |       |   |      |          |   |                   |
|-----|----------|-----------|-----------|-------|---|------|----------|---|-------------------|
| 119 | 452.2506 | 902.4866  | 902.4895  | -3.18 | 0 | 15   | 3.5      | 1 | K.MLTINPSK.R      |
| 125 | 461.2198 | 920.4250  | 920.4199  | 5.57  | 0 | 43   | 0.0033   | 1 | R.TAQSEETR.V      |
| 126 | 463.2444 | 924.4742  | 924.4777  | -3.74 | 1 | 11   | 5.1      | 1 | R.DHQKLER.E       |
| 197 | 525.2842 | 1048.5538 | 1048.5553 | -1.37 | 0 | (33) | 0.046    | 1 | K.VLAGQEYAAK.I    |
| 198 | 525.2860 | 1048.5574 | 1048.5553 | 2.06  | 0 | (53) | 0.0004   | 1 | K.VLAGQEYAAK.I    |
| 199 | 525.2860 | 1048.5574 | 1048.5553 | 2.06  | 0 | 55   | 0.00028  | 1 | K.VLAGQEYAAK.I    |
| 200 | 525.2863 | 1048.5580 | 1048.5553 | 2.64  | 0 | (41) | 0.0067   | 1 | K.VLAGQEYAAK.I    |
| 201 | 525.2864 | 1048.5582 | 1048.5553 | 2.83  | 0 | (48) | 0.0013   | 1 | K.VLAGQEYAAK.I    |
| 202 | 525.2868 | 1048.5590 | 1048.5553 | 3.59  | 0 | (51) | 0.00065  | 1 | K.VLAGQEYAAK.I    |
| 205 | 530.2988 | 1058.5830 | 1058.5906 | -7.15 | 1 | (10) | 9.3      | 2 | K.MLTINPSKR.I     |
| 206 | 530.2996 | 1058.5846 | 1058.5906 | -5.64 | 1 | (11) | 6.5      | 1 | K.MLTINPSKR.I     |
| 207 | 530.3001 | 1058.5856 | 1058.5906 | -4.70 | 1 | 41   | 0.0064   | 1 | K.MLTINPSKR.I     |
| 208 | 530.3005 | 1058.5864 | 1058.5906 | -3.94 | 1 | (40) | 0.0086   | 1 | K.MLTINPSKR.I     |
| 209 | 530.3017 | 1058.5888 | 1058.5906 | -1.68 | 1 | (31) | 0.054    | 1 | K.MLTINPSKR.I     |
| 210 | 530.3018 | 1058.5890 | 1058.5906 | -1.49 | 1 | (14) | 3.1      | 1 | K.MLTINPSKR.I     |
| 211 | 530.3021 | 1058.5896 | 1058.5906 | -0.92 | 1 | (34) | 0.028    | 1 | K.MLTINPSKR.I     |
| 212 | 530.3030 | 1058.5914 | 1058.5906 | 0.78  | 1 | (36) | 0.017    | 1 | K.MLTINPSKR.I     |
| 213 | 530.3034 | 1058.5922 | 1058.5906 | 1.54  | 1 | (29) | 0.09     | 1 | K.MLTINPSKR.I     |
| 214 | 530.3041 | 1058.5936 | 1058.5906 | 2.86  | 1 | (34) | 0.031    | 1 | K.MLTINPSKR.I     |
| 215 | 530.3043 | 1058.5940 | 1058.5906 | 3.24  | 1 | (36) | 0.017    | 1 | K.MLTINPSKR.I     |
| 216 | 530.3059 | 1058.5972 | 1058.5906 | 6.26  | 1 | (6)  | 19       | 1 | K.MLTINPSKR.I     |
| 217 | 530.3068 | 1058.5990 | 1058.5906 | 7.96  | 1 | (5)  | 23       | 2 | K.MLTINPSKR.I     |
| 220 | 530.3162 | 1058.6178 | 1058.5906 | 25.7  | 1 | (7)  | 9.3      | 2 | K.MLTINPSKR.I     |
| 280 | 574.3269 | 1146.6392 | 1146.6431 | -3.33 | 0 | (48) | 0.00085  | 1 | K.GALLTTLATR.N    |
| 281 | 574.3270 | 1146.6394 | 1146.6431 | -3.16 | 0 | 54   | 0.00024  | 1 | K.GALLTTLATR.N    |
| 282 | 574.3282 | 1146.6418 | 1146.6431 | -1.06 | 0 | (46) | 0.0015   | 1 | K.GALLTTLATR.N    |
| 334 | 631.3043 | 1260.5940 | 1260.5927 | 1.04  | 0 | (33) | 0.032    | 1 | R.FYPENLWSR.N     |
| 335 | 631.3046 | 1260.5946 | 1260.5927 | 1.51  | 0 | (54) | 0.00029  | 1 | R.FYPENLWSR.N     |
| 336 | 631.3046 | 1260.5946 | 1260.5927 | 1.51  | 0 | (54) | 0.00029  | 1 | R.FYPENLWSR.N     |
| 337 | 631.3046 | 1260.5946 | 1260.5927 | 1.51  | 0 | (38) | 0.0095   | 1 | R.FYPENLWSR.N     |
| 338 | 631.3051 | 1260.5956 | 1260.5927 | 2.30  | 0 | 58   | 0.00011  | 1 | R.FYPENLWSR.N     |
| 339 | 631.3056 | 1260.5966 | 1260.5927 | 3.10  | 0 | (54) | 0.00026  | 1 | R.FYPENLWSR.N     |
| 340 | 631.3057 | 1260.5968 | 1260.5927 | 3.26  | 0 | (54) | 0.00029  | 1 | R.FYPENLWSR.N     |
| 341 | 631.3057 | 1260.5968 | 1260.5927 | 3.26  | 0 | (38) | 0.012    | 1 | R.FYPENLWSR.N     |
| 342 | 631.3059 | 1260.5972 | 1260.5927 | 3.57  | 0 | (34) | 0.025    | 1 | R.FYPENLWSR.N     |
| 343 | 631.3104 | 1260.6062 | 1260.5927 | 10.7  | 0 | (53) | 0.00038  | 1 | R.FYPENLWSR.N     |
| 344 | 631.3109 | 1260.6072 | 1260.5927 | 11.5  | 0 | (54) | 0.00033  | 1 | R.FYPENLWSR.N     |
| 357 | 652.3538 | 1302.6930 | 1302.6932 | -0.11 | 0 | (72) | 4.3e-006 | 1 | R.ITQYLDAGGIPR.T  |
| 358 | 652.3549 | 1302.6952 | 1302.6932 | 1.58  | 0 | 81   | 5.8e-007 | 1 | R.ITQYLDAGGIPR.T  |
| 359 | 652.3557 | 1302.6968 | 1302.6932 | 2.81  | 0 | (79) | 9.7e-007 | 1 | R.ITQYLDAGGIPR.T  |
| 360 | 652.3559 | 1302.6972 | 1302.6932 | 3.11  | 0 | (59) | 9.2e-005 | 1 | R.ITQYLDAGGIPR.T  |
| 361 | 652.3559 | 1302.6972 | 1302.6932 | 3.11  | 0 | (55) | 0.00023  | 1 | R.ITQYLDAGGIPR.T  |
| 362 | 652.3560 | 1302.6974 | 1302.6932 | 3.27  | 0 | (66) | 1.6e-005 | 1 | R.ITQYLDAGGIPR.T  |
| 370 | 670.8879 | 1339.7612 | 1339.7711 | -7.33 | 0 | (37) | 0.0084   | 1 | R.DLKPENLLASK.L   |
| 371 | 670.8884 | 1339.7622 | 1339.7711 | -6.59 | 0 | (26) | 0.11     | 1 | R.DLKPENLLASK.L   |
| 372 | 670.8900 | 1339.7654 | 1339.7711 | -4.20 | 0 | (26) | 0.1      | 1 | R.DLKPENLLASK.L   |
| 373 | 670.8904 | 1339.7662 | 1339.7711 | -3.60 | 0 | (41) | 0.0029   | 1 | R.DLKPENLLASK.L   |
| 374 | 670.8911 | 1339.7676 | 1339.7711 | -2.56 | 0 | 67   | 7.6e-006 | 1 | R.DLKPENLLASK.L   |
| 375 | 670.8915 | 1339.7684 | 1339.7711 | -1.96 | 0 | (39) | 0.0044   | 1 | R.DLKPENLLASK.L   |
| 376 | 670.8923 | 1339.7700 | 1339.7711 | -0.76 | 0 | (27) | 0.069    | 1 | R.DLKPENLLASK.L   |
| 377 | 670.8923 | 1339.7700 | 1339.7711 | -0.76 | 0 | (34) | 0.015    | 1 | R.DLKPENLLASK.L   |
| 378 | 670.8926 | 1339.7706 | 1339.7711 | -0.32 | 0 | (45) | 0.0012   | 1 | R.DLKPENLLASK.L   |
| 379 | 670.8926 | 1339.7706 | 1339.7711 | -0.32 | 0 | (39) | 0.0046   | 1 | R.DLKPENLLASK.L   |
| 380 | 670.8930 | 1339.7714 | 1339.7711 | 0.28  | 0 | (36) | 0.01     | 1 | R.DLKPENLLASK.L   |
| 381 | 670.8934 | 1339.7722 | 1339.7711 | 0.88  | 0 | (35) | 0.011    | 1 | R.DLKPENLLASK.L   |
| 382 | 670.8936 | 1339.7726 | 1339.7711 | 1.18  | 0 | (32) | 0.026    | 1 | R.DLKPENLLASK.L   |
| 383 | 670.8938 | 1339.7730 | 1339.7711 | 1.47  | 0 | (28) | 0.054    | 1 | R.DLKPENLLASK.L   |
| 384 | 670.8939 | 1339.7732 | 1339.7711 | 1.62  | 0 | (47) | 0.00072  | 1 | R.DLKPENLLASK.L   |
| 385 | 670.8940 | 1339.7734 | 1339.7711 | 1.77  | 0 | (1)  | 30       | 9 | R.DLKPENLLASK.L   |
| 386 | 670.8944 | 1339.7742 | 1339.7711 | 2.37  | 0 | (32) | 0.02     | 1 | R.DLKPENLLASK.L   |
| 387 | 670.8953 | 1339.7760 | 1339.7711 | 3.71  | 0 | (47) | 0.00064  | 1 | R.DLKPENLLASK.L   |
| 388 | 670.8953 | 1339.7760 | 1339.7711 | 3.71  | 0 | (47) | 0.00077  | 1 | R.DLKPENLLASK.L   |
| 389 | 670.8954 | 1339.7762 | 1339.7711 | 3.86  | 0 | (21) | 0.31     | 1 | R.DLKPENLLASK.L   |
| 390 | 670.8956 | 1339.7766 | 1339.7711 | 4.16  | 0 | (38) | 0.006    | 1 | R.DLKPENLLASK.L   |
| 500 | 816.8917 | 1631.7688 | 1631.7719 | -1.86 | 0 | (17) | 1.2      | 1 | R.FTEEYQLFEELGK.G |
| 501 | 816.8925 | 1631.7704 | 1631.7719 | -0.88 | 0 | (49) | 0.00075  | 1 | R.FTEEYQLFEELGK.G |
| 503 | 816.8930 | 1631.7714 | 1631.7719 | -0.27 | 0 | (52) | 0.00039  | 1 | R.FTEEYQLFEELGK.G |
| 504 | 816.8939 | 1631.7732 | 1631.7719 | 0.84  | 0 | (63) | 2.9e-005 | 1 | R.FTEEYQLFEELGK.G |
| 505 | 816.8942 | 1631.7738 | 1631.7719 | 1.21  | 0 | (36) | 0.015    | 1 | R.FTEEYQLFEELGK.G |
| 506 | 816.8947 | 1631.7748 | 1631.7719 | 1.82  | 0 | (18) | 1        | 1 | R.FTEEYQLFEELGK.G |
| 507 | 816.8947 | 1631.7748 | 1631.7719 | 1.82  | 0 | (60) | 6.1e-005 | 1 | R.FTEEYQLFEELGK.G |
| 508 | 816.8950 | 1631.7754 | 1631.7719 | 2.19  | 0 | (42) | 0.0042   | 1 | R.FTEEYQLFEELGK.G |
| 509 | 816.8950 | 1631.7754 | 1631.7719 | 2.19  | 0 | (59) | 8.7e-005 | 1 | R.FTEEYQLFEELGK.G |
| 510 | 816.8951 | 1631.7756 | 1631.7719 | 2.31  | 0 | (61) | 4.6e-005 | 1 | R.FTEEYQLFEELGK.G |
| 511 | 816.8951 | 1631.7756 | 1631.7719 | 2.31  | 0 | (30) | 0.065    | 1 | R.FTEEYQLFEELGK.G |
| 512 | 816.8953 | 1631.7760 | 1631.7719 | 2.55  | 0 | 67   | 1.2e-005 | 1 | R.FTEEYQLFEELGK.G |
| 513 | 816.8953 | 1631.7760 | 1631.7719 | 2.55  | 0 | (53) | 0.0003   | 1 | R.FTEEYQLFEELGK.G |
| 515 | 816.8961 | 1631.7776 | 1631.7719 | 3.53  | 0 | (44) | 0.0026   | 1 | R.FTEEYQLFEELGK.G |
| 516 | 816.8964 | 1631.7782 | 1631.7719 | 3.90  | 0 | (30) | 0.062    | 1 | R.FTEEYQLFEELGK.G |
| 517 | 816.8969 | 1631.7792 | 1631.7719 | 4.51  | 0 | (42) | 0.0043   | 1 | R.FTEEYQLFEELGK.G |
| 518 | 816.8969 | 1631.7792 | 1631.7719 | 4.51  | 0 | (48) | 0.0011   | 1 | R.FTEEYQLFEELGK.G |



|                                     |                     |           |           |           |        |   |      |          |   |                            |
|-------------------------------------|---------------------|-----------|-----------|-----------|--------|---|------|----------|---|----------------------------|
| <input checked="" type="checkbox"/> | <a href="#">520</a> | 816.8972  | 1631.7798 | 1631.7719 | 4.88   | 0 | (56) | 0.00017  | 1 | R.FTEEYQLFEELGK.G          |
| <input checked="" type="checkbox"/> | <a href="#">521</a> | 816.8972  | 1631.7798 | 1631.7719 | 4.88   | 0 | (0)  | 58       | 9 | R.FTEEYQLFEELGK.G          |
| <input checked="" type="checkbox"/> | <a href="#">523</a> | 816.8978  | 1631.7810 | 1631.7719 | 5.62   | 0 | (52) | 0.00042  | 1 | R.FTEEYQLFEELGK.G          |
| <input checked="" type="checkbox"/> | <a href="#">524</a> | 816.8982  | 1631.7818 | 1631.7719 | 6.11   | 0 | (52) | 0.00039  | 1 | R.FTEEYQLFEELGK.G          |
| <input checked="" type="checkbox"/> | <a href="#">526</a> | 816.9008  | 1631.7870 | 1631.7719 | 9.29   | 0 | (29) | 0.082    | 1 | R.FTEEYQLFEELGK.G          |
| <input checked="" type="checkbox"/> | <a href="#">528</a> | 816.9053  | 1631.7960 | 1631.7719 | 14.8   | 0 | (35) | 0.022    | 1 | R.FTEEYQLFEELGK.G          |
| <input checked="" type="checkbox"/> | <a href="#">578</a> | 694.3150  | 2079.9232 | 2079.9426 | -9.32  | 0 | 75   | 1e-006   | 1 | K.AGAYDFPSPWDVTPEAK.D      |
| <input checked="" type="checkbox"/> | <a href="#">579</a> | 694.3163  | 2079.9271 | 2079.9426 | -7.44  | 0 | (64) | 1.4e-005 | 1 | K.AGAYDFPSPWDVTPEAK.D      |
| <input checked="" type="checkbox"/> | <a href="#">580</a> | 1040.9812 | 2079.9478 | 2079.9426 | 2.55   | 0 | (28) | 0.064    | 1 | K.AGAYDFPSPWDVTPEAK.D      |
| <input checked="" type="checkbox"/> | <a href="#">581</a> | 1040.9817 | 2079.9488 | 2079.9426 | 3.03   | 0 | (51) | 0.00036  | 1 | K.AGAYDFPSPWDVTPEAK.D      |
| <input checked="" type="checkbox"/> | <a href="#">582</a> | 1040.9819 | 2079.9492 | 2079.9426 | 3.22   | 0 | (60) | 4.1e-005 | 1 | K.AGAYDFPSPWDVTPEAK.D      |
| <input checked="" type="checkbox"/> | <a href="#">583</a> | 1040.9828 | 2079.9510 | 2079.9426 | 4.09   | 0 | (58) | 6.4e-005 | 1 | K.AGAYDFPSPWDVTPEAK.D      |
| <input checked="" type="checkbox"/> | <a href="#">584</a> | 1040.9840 | 2079.9534 | 2079.9426 | 5.24   | 0 | (36) | 0.01     | 1 | K.AGAYDFPSPWDVTPEAK.D      |
| <input checked="" type="checkbox"/> | <a href="#">590</a> | 715.3455  | 2143.0147 | 2143.0321 | -8.12  | 0 | 60   | 5.1e-005 | 1 | K.VTEQLIEAISNGDFESYTK.M    |
| <input checked="" type="checkbox"/> | <a href="#">657</a> | 888.7528  | 2663.2366 | 2663.2755 | -14.62 | 1 | (19) | 0.51     | 1 | K.AGAYDFPSPWDVTPEAKDLINK.M |
| <input checked="" type="checkbox"/> | <a href="#">658</a> | 888.7558  | 2663.2456 | 2663.2755 | -11.24 | 1 | (7)  | 7.8      | 2 | K.AGAYDFPSPWDVTPEAKDLINK.M |
| <input checked="" type="checkbox"/> | <a href="#">659</a> | 888.7559  | 2663.2459 | 2663.2755 | -11.12 | 1 | (26) | 0.11     | 1 | K.AGAYDFPSPWDVTPEAKDLINK.M |
| <input checked="" type="checkbox"/> | <a href="#">660</a> | 888.7564  | 2663.2474 | 2663.2755 | -10.56 | 1 | (47) | 0.00075  | 1 | K.AGAYDFPSPWDVTPEAKDLINK.M |
| <input checked="" type="checkbox"/> | <a href="#">661</a> | 888.7583  | 2663.2531 | 2663.2755 | -8.42  | 1 | (17) | 0.87     | 1 | K.AGAYDFPSPWDVTPEAKDLINK.M |
| <input checked="" type="checkbox"/> | <a href="#">662</a> | 888.7584  | 2663.2534 | 2663.2755 | -8.31  | 1 | (63) | 1.9e-005 | 1 | K.AGAYDFPSPWDVTPEAKDLINK.M |
| <input checked="" type="checkbox"/> | <a href="#">663</a> | 888.7586  | 2663.2540 | 2663.2755 | -8.08  | 1 | (54) | 0.00018  | 1 | K.AGAYDFPSPWDVTPEAKDLINK.M |
| <input checked="" type="checkbox"/> | <a href="#">664</a> | 888.7588  | 2663.2546 | 2663.2755 | -7.86  | 1 | (63) | 2e-005   | 1 | K.AGAYDFPSPWDVTPEAKDLINK.M |
| <input checked="" type="checkbox"/> | <a href="#">665</a> | 888.7589  | 2663.2549 | 2663.2755 | -7.74  | 1 | (64) | 1.8e-005 | 1 | K.AGAYDFPSPWDVTPEAKDLINK.M |
| <input checked="" type="checkbox"/> | <a href="#">666</a> | 888.7592  | 2663.2558 | 2663.2755 | -7.41  | 1 | (26) | 0.12     | 1 | K.AGAYDFPSPWDVTPEAKDLINK.M |
| <input checked="" type="checkbox"/> | <a href="#">667</a> | 888.7593  | 2663.2561 | 2663.2755 | -7.29  | 1 | (17) | 0.85     | 1 | K.AGAYDFPSPWDVTPEAKDLINK.M |
| <input checked="" type="checkbox"/> | <a href="#">668</a> | 888.7594  | 2663.2564 | 2663.2755 | -7.18  | 1 | (45) | 0.0012   | 1 | K.AGAYDFPSPWDVTPEAKDLINK.M |
| <input checked="" type="checkbox"/> | <a href="#">669</a> | 888.7597  | 2663.2573 | 2663.2755 | -6.84  | 1 | 80   | 4e-007   | 1 | K.AGAYDFPSPWDVTPEAKDLINK.M |
| <input checked="" type="checkbox"/> | <a href="#">670</a> | 888.7598  | 2663.2576 | 2663.2755 | -6.73  | 1 | (75) | 1.2e-006 | 1 | K.AGAYDFPSPWDVTPEAKDLINK.M |
| <input checked="" type="checkbox"/> | <a href="#">671</a> | 888.7599  | 2663.2579 | 2663.2755 | -6.62  | 1 | (21) | 0.33     | 1 | K.AGAYDFPSPWDVTPEAKDLINK.M |
| <input checked="" type="checkbox"/> | <a href="#">672</a> | 888.7599  | 2663.2579 | 2663.2755 | -6.62  | 1 | (4)  | 15       | 1 | K.AGAYDFPSPWDVTPEAKDLINK.M |
| <input checked="" type="checkbox"/> | <a href="#">674</a> | 888.7605  | 2663.2597 | 2663.2755 | -5.94  | 1 | (28) | 0.072    | 1 | K.AGAYDFPSPWDVTPEAKDLINK.M |
| <input checked="" type="checkbox"/> | <a href="#">675</a> | 888.7608  | 2663.2606 | 2663.2755 | -5.60  | 1 | (67) | 8e-006   | 1 | K.AGAYDFPSPWDVTPEAKDLINK.M |
| <input checked="" type="checkbox"/> | <a href="#">676</a> | 888.7608  | 2663.2606 | 2663.2755 | -5.60  | 1 | (27) | 0.086    | 1 | K.AGAYDFPSPWDVTPEAKDLINK.M |

## Proteins matching the same set of peptides:

IPI00621806 Mass: 54651 Score: 1434 Queries matched: 119

Tax\_Id=10090 Gene\_Symbol=Camk2a Isoform Alpha CAMKII of Calcium/calmodulin-dependent protein kinase type II subunit alpha

## 2. IPI00474502 Mass: 61164 Score: 978 Queries matched: 66 emPAI: 0.78

Tax\_Id=10090 Gene\_Symbol=Camk2b Calcium/calmodulin-dependent protein kinase type II subunit beta

 Check to include this hit in error tolerant search or archive report

| Query                               | Observed            | Mr(expt) | Mr(calc)  | ppm       | Miss  | Score | Expect | Rank     | Peptide |                   |
|-------------------------------------|---------------------|----------|-----------|-----------|-------|-------|--------|----------|---------|-------------------|
| <input checked="" type="checkbox"/> | <a href="#">120</a> | 452.7383 | 903.4620  | 903.4661  | -4.53 | 0     | (11)   | 7.7      | 1       | K.NSSAITSFK.G     |
| <input checked="" type="checkbox"/> | <a href="#">121</a> | 452.7405 | 903.4664  | 903.4661  | 0.34  | 0     | (4)    | 43       | 3       | K.NSSAITSFK.G     |
| <input checked="" type="checkbox"/> | <a href="#">122</a> | 452.7416 | 903.4686  | 903.4661  | 2.77  | 0     | 31     | 0.089    | 1       | K.NSSAITSFK.G     |
| <input checked="" type="checkbox"/> | <a href="#">123</a> | 452.7432 | 903.4718  | 903.4661  | 6.32  | 0     | (28)   | 0.16     | 1       | K.NSSAITSFK.G     |
| <input checked="" type="checkbox"/> | <a href="#">126</a> | 463.2444 | 924.4742  | 924.4777  | -3.74 | 1     | 11     | 5.1      | 1       | R.DHKQLER.E       |
| <input checked="" type="checkbox"/> | <a href="#">132</a> | 469.2222 | 936.4298  | 936.4148  | 16.0  | 0     | 26     | 0.16     | 1       | R.TSQSEETR.V      |
| <input checked="" type="checkbox"/> | <a href="#">274</a> | 572.8061 | 1143.5976 | 1143.5964 | 1.07  | 0     | (22)   | 0.51     | 1       | R.FYFENLLAK.N     |
| <input checked="" type="checkbox"/> | <a href="#">275</a> | 572.8066 | 1143.5986 | 1143.5964 | 1.95  | 0     | (12)   | 5.4      | 1       | R.FYFENLLAK.N     |
| <input checked="" type="checkbox"/> | <a href="#">276</a> | 572.8070 | 1143.5994 | 1143.5964 | 2.65  | 0     | 23     | 0.44     | 1       | R.FYFENLLAK.N     |
| <input checked="" type="checkbox"/> | <a href="#">277</a> | 572.8071 | 1143.5996 | 1143.5964 | 2.82  | 0     | (11)   | 7.5      | 1       | R.FYFENLLAK.N     |
| <input checked="" type="checkbox"/> | <a href="#">278</a> | 572.8080 | 1143.6014 | 1143.5964 | 4.40  | 0     | (16)   | 2.1      | 1       | R.FYFENLLAK.N     |
| <input checked="" type="checkbox"/> | <a href="#">280</a> | 574.3269 | 1146.6392 | 1146.6431 | -3.33 | 0     | (48)   | 0.00085  | 1       | K.GAILTTMLATR.N   |
| <input checked="" type="checkbox"/> | <a href="#">281</a> | 574.3270 | 1146.6394 | 1146.6431 | -3.16 | 0     | 54     | 0.00024  | 1       | K.GAILTTMLATR.N   |
| <input checked="" type="checkbox"/> | <a href="#">282</a> | 574.3282 | 1146.6418 | 1146.6431 | -1.06 | 0     | (46)   | 0.0015   | 1       | K.GAILTTMLATR.N   |
| <input checked="" type="checkbox"/> | <a href="#">370</a> | 670.8879 | 1339.7612 | 1339.7711 | -7.33 | 0     | (37)   | 0.0084   | 1       | R.DLKPENLLASK.C   |
| <input checked="" type="checkbox"/> | <a href="#">371</a> | 670.8884 | 1339.7622 | 1339.7711 | -6.59 | 0     | (26)   | 0.11     | 1       | R.DLKPENLLASK.C   |
| <input checked="" type="checkbox"/> | <a href="#">372</a> | 670.8900 | 1339.7654 | 1339.7711 | -4.20 | 0     | (26)   | 0.1      | 1       | R.DLKPENLLASK.C   |
| <input checked="" type="checkbox"/> | <a href="#">373</a> | 670.8904 | 1339.7662 | 1339.7711 | -3.60 | 0     | (41)   | 0.0029   | 1       | R.DLKPENLLASK.C   |
| <input checked="" type="checkbox"/> | <a href="#">374</a> | 670.8911 | 1339.7676 | 1339.7711 | -2.56 | 0     | 67     | 7.6e-006 | 1       | R.DLKPENLLASK.C   |
| <input checked="" type="checkbox"/> | <a href="#">375</a> | 670.8915 | 1339.7684 | 1339.7711 | -1.96 | 0     | (39)   | 0.0044   | 1       | R.DLKPENLLASK.C   |
| <input checked="" type="checkbox"/> | <a href="#">376</a> | 670.8923 | 1339.7700 | 1339.7711 | -0.76 | 0     | (34)   | 0.015    | 1       | R.DLKPENLLASK.C   |
| <input checked="" type="checkbox"/> | <a href="#">377</a> | 670.8926 | 1339.7706 | 1339.7711 | -0.32 | 0     | (45)   | 0.0012   | 1       | R.DLKPENLLASK.C   |
| <input checked="" type="checkbox"/> | <a href="#">379</a> | 670.8926 | 1339.7706 | 1339.7711 | -0.32 | 0     | (39)   | 0.0046   | 1       | R.DLKPENLLASK.C   |
| <input checked="" type="checkbox"/> | <a href="#">380</a> | 670.8930 | 1339.7714 | 1339.7711 | 0.28  | 0     | (36)   | 0.01     | 1       | R.DLKPENLLASK.C   |
| <input checked="" type="checkbox"/> | <a href="#">381</a> | 670.8934 | 1339.7722 | 1339.7711 | 0.88  | 0     | (35)   | 0.011    | 1       | R.DLKPENLLASK.C   |
| <input checked="" type="checkbox"/> | <a href="#">382</a> | 670.8936 | 1339.7726 | 1339.7711 | 1.18  | 0     | (32)   | 0.026    | 1       | R.DLKPENLLASK.C   |
| <input checked="" type="checkbox"/> | <a href="#">383</a> | 670.8938 | 1339.7730 | 1339.7711 | 1.47  | 0     | (28)   | 0.054    | 1       | R.DLKPENLLASK.C   |
| <input checked="" type="checkbox"/> | <a href="#">384</a> | 670.8939 | 1339.7732 | 1339.7711 | 1.62  | 0     | (47)   | 0.00072  | 1       | R.DLKPENLLASK.C   |
| <input checked="" type="checkbox"/> | <a href="#">385</a> | 670.8940 | 1339.7734 | 1339.7711 | 1.77  | 0     | (1)    | 30       | 9       | R.DLKPENLLASK.C   |
| <input checked="" type="checkbox"/> | <a href="#">386</a> | 670.8944 | 1339.7742 | 1339.7711 | 2.37  | 0     | (32)   | 0.02     | 1       | R.DLKPENLLASK.C   |
| <input checked="" type="checkbox"/> | <a href="#">387</a> | 670.8953 | 1339.7760 | 1339.7711 | 3.71  | 0     | (47)   | 0.00064  | 1       | R.DLKPENLLASK.C   |
| <input checked="" type="checkbox"/> | <a href="#">388</a> | 670.8953 | 1339.7760 | 1339.7711 | 3.71  | 0     | (47)   | 0.00077  | 1       | R.DLKPENLLASK.C   |
| <input checked="" type="checkbox"/> | <a href="#">389</a> | 670.8954 | 1339.7762 | 1339.7711 | 3.86  | 0     | (21)   | 0.31     | 1       | R.DLKPENLLASK.C   |
| <input checked="" type="checkbox"/> | <a href="#">390</a> | 670.8956 | 1339.7766 | 1339.7711 | 4.16  | 0     | (38)   | 0.006    | 1       | R.DLKPENLLASK.C   |
| <input checked="" type="checkbox"/> | <a href="#">414</a> | 702.3716 | 1402.7286 | 1402.7317 | -2.18 | 0     | (2)    | 41       | 1       | R.LTQYIDGQGRPR.T  |
| <input checked="" type="checkbox"/> | <a href="#">415</a> | 702.3759 | 1402.7372 | 1402.7317 | 3.95  | 0     | 5      | 23       | 2       | R.LTQYIDGQGRPR.T  |
| <input checked="" type="checkbox"/> | <a href="#">429</a> | 735.4117 | 1468.8088 | 1468.8071 | 1.16  | 0     | (58)   | 6.9e-005 | 1       | K.NLINQMLTINPAK.R |
| <input checked="" type="checkbox"/> | <a href="#">430</a> | 735.4119 | 1468.8092 | 1468.8071 | 1.43  | 0     | (63)   | 2.2e-005 | 1       | K.NLINQMLTINPAK.R |
| <input checked="" type="checkbox"/> | <a href="#">431</a> | 735.4133 | 1468.8120 | 1468.8071 | 3.34  | 0     | (74)   | 2e-006   | 1       | K.NLINQMLTINPAK.R |
| <input checked="" type="checkbox"/> | <a href="#">432</a> | 735.4143 | 1468.8140 | 1468.8071 | 4.70  | 0     | 76     | 1.2e-006 | 1       | K.NLINQMLTINPAK.R |

|                                     |                     |                           |                           |                           |                        |                   |                      |                          |                   |                                                              |
|-------------------------------------|---------------------|---------------------------|---------------------------|---------------------------|------------------------|-------------------|----------------------|--------------------------|-------------------|--------------------------------------------------------------|
| <input checked="" type="checkbox"/> | <a href="#">539</a> | <a href="#">871.3708</a>  | <a href="#">1740.7270</a> | <a href="#">1740.7173</a> | <a href="#">5.57</a>   | <a href="#">0</a> | <a href="#">(7)</a>  | <a href="#">3.6</a>      | <a href="#">1</a> | <a href="#">K.ESSDSTNTTIEDEDAK.A</a>                         |
| <input checked="" type="checkbox"/> | <a href="#">540</a> | <a href="#">871.3715</a>  | <a href="#">1740.7284</a> | <a href="#">1740.7173</a> | <a href="#">6.38</a>   | <a href="#">0</a> | <a href="#">17</a>   | <a href="#">0.37</a>     | <a href="#">1</a> | <a href="#">K.ESSDSTNTTIEDEDAK.A</a>                         |
| <input checked="" type="checkbox"/> | <a href="#">572</a> | <a href="#">656.9528</a>  | <a href="#">1967.8366</a> | <a href="#">1967.8556</a> | <a href="#">-9.65</a>  | <a href="#">1</a> | <a href="#">94</a>   | <a href="#">8.3e-009</a> | <a href="#">1</a> | <a href="#">K.ESSDSTNTTIEDEDAKAR.K</a>                       |
|                                     | <a href="#">578</a> | <a href="#">694.3150</a>  | <a href="#">2079.9232</a> | <a href="#">2079.9426</a> | <a href="#">-9.32</a>  | <a href="#">0</a> | <a href="#">75</a>   | <a href="#">1e-006</a>   | <a href="#">1</a> | <a href="#">K.AGAYDFPSPWDVTPEAK.N</a>                        |
|                                     | <a href="#">579</a> | <a href="#">694.3163</a>  | <a href="#">2079.9271</a> | <a href="#">2079.9426</a> | <a href="#">-7.44</a>  | <a href="#">0</a> | <a href="#">(64)</a> | <a href="#">1.4e-005</a> | <a href="#">1</a> | <a href="#">K.AGAYDFPSPWDVTPEAK.N</a>                        |
|                                     | <a href="#">580</a> | <a href="#">1040.9812</a> | <a href="#">2079.9478</a> | <a href="#">2079.9426</a> | <a href="#">2.55</a>   | <a href="#">0</a> | <a href="#">(28)</a> | <a href="#">0.064</a>    | <a href="#">1</a> | <a href="#">K.AGAYDFPSPWDVTPEAK.N</a>                        |
|                                     | <a href="#">581</a> | <a href="#">1040.9817</a> | <a href="#">2079.9488</a> | <a href="#">2079.9426</a> | <a href="#">3.03</a>   | <a href="#">0</a> | <a href="#">(51)</a> | <a href="#">0.00036</a>  | <a href="#">1</a> | <a href="#">K.AGAYDFPSPWDVTPEAK.N</a>                        |
|                                     | <a href="#">582</a> | <a href="#">1040.9819</a> | <a href="#">2079.9492</a> | <a href="#">2079.9426</a> | <a href="#">3.22</a>   | <a href="#">0</a> | <a href="#">(60)</a> | <a href="#">4.1e-005</a> | <a href="#">1</a> | <a href="#">K.AGAYDFPSPWDVTPEAK.N</a>                        |
|                                     | <a href="#">583</a> | <a href="#">1040.9828</a> | <a href="#">2079.9510</a> | <a href="#">2079.9426</a> | <a href="#">4.09</a>   | <a href="#">0</a> | <a href="#">(58)</a> | <a href="#">6.4e-005</a> | <a href="#">1</a> | <a href="#">K.AGAYDFPSPWDVTPEAK.N</a>                        |
|                                     | <a href="#">584</a> | <a href="#">1040.9840</a> | <a href="#">2079.9534</a> | <a href="#">2079.9426</a> | <a href="#">5.24</a>   | <a href="#">0</a> | <a href="#">(36)</a> | <a href="#">0.01</a>     | <a href="#">1</a> | <a href="#">K.AGAYDFPSPWDVTPEAK.N</a>                        |
| <input checked="" type="checkbox"/> | <a href="#">588</a> | <a href="#">705.0029</a>  | <a href="#">2111.9869</a> | <a href="#">2112.0011</a> | <a href="#">-6.74</a>  | <a href="#">0</a> | <a href="#">71</a>   | <a href="#">3.9e-006</a> | <a href="#">1</a> | <a href="#">K.TTEQLIEAVNNGDFEAYK.I</a>                       |
| <input checked="" type="checkbox"/> | <a href="#">634</a> | <a href="#">779.7132</a>  | <a href="#">2336.1178</a> | <a href="#">2336.1325</a> | <a href="#">-6.29</a>  | <a href="#">1</a> | <a href="#">17</a>   | <a href="#">0.81</a>     | <a href="#">1</a> | <a href="#">R.FTDEYQLYEDIGKGFVSVVR.R</a>                     |
| <input checked="" type="checkbox"/> | <a href="#">635</a> | <a href="#">779.7135</a>  | <a href="#">2336.1187</a> | <a href="#">2336.1325</a> | <a href="#">-5.91</a>  | <a href="#">1</a> | <a href="#">(9)</a>  | <a href="#">6</a>        | <a href="#">1</a> | <a href="#">R.FTDEYQLYEDIGKGFVSVVR.R</a>                     |
| <input checked="" type="checkbox"/> | <a href="#">637</a> | <a href="#">779.7166</a>  | <a href="#">2336.1280</a> | <a href="#">2336.1325</a> | <a href="#">-1.93</a>  | <a href="#">1</a> | <a href="#">(15)</a> | <a href="#">1.4</a>      | <a href="#">1</a> | <a href="#">R.FTDEYQLYEDIGKGFVSVVR.R</a>                     |
| <input checked="" type="checkbox"/> | <a href="#">643</a> | <a href="#">785.0448</a>  | <a href="#">2352.1126</a> | <a href="#">2352.1301</a> | <a href="#">-7.46</a>  | <a href="#">0</a> | <a href="#">(89)</a> | <a href="#">4.8e-008</a> | <a href="#">1</a> | <a href="#">R.QTTAPATMSTAASGTTMGLVEQAK.S</a>                 |
| <input checked="" type="checkbox"/> | <a href="#">644</a> | <a href="#">785.0455</a>  | <a href="#">2352.1147</a> | <a href="#">2352.1301</a> | <a href="#">-6.56</a>  | <a href="#">0</a> | <a href="#">(88)</a> | <a href="#">6.7e-008</a> | <a href="#">1</a> | <a href="#">R.QTTAPATMSTAASGTTMGLVEQAK.S</a>                 |
| <input checked="" type="checkbox"/> | <a href="#">645</a> | <a href="#">1177.0762</a> | <a href="#">2352.1378</a> | <a href="#">2352.1301</a> | <a href="#">3.29</a>   | <a href="#">0</a> | <a href="#">(96)</a> | <a href="#">1e-008</a>   | <a href="#">1</a> | <a href="#">R.QTTAPATMSTAASGTTMGLVEQAK.S</a>                 |
| <input checked="" type="checkbox"/> | <a href="#">646</a> | <a href="#">1177.0767</a> | <a href="#">2352.1388</a> | <a href="#">2352.1301</a> | <a href="#">3.71</a>   | <a href="#">0</a> | <a href="#">98</a>   | <a href="#">7.3e-009</a> | <a href="#">1</a> | <a href="#">R.QTTAPATMSTAASGTTMGLVEQAK.S</a>                 |
| <input checked="" type="checkbox"/> | <a href="#">647</a> | <a href="#">785.4142</a>  | <a href="#">2353.2208</a> | <a href="#">2353.2642</a> | <a href="#">-18.44</a> | <a href="#">0</a> | <a href="#">(35)</a> | <a href="#">0.013</a>    | <a href="#">1</a> | <a href="#">K.GSLPPAALEPQTTVIHNVPDGIK.E</a>                  |
| <input checked="" type="checkbox"/> | <a href="#">648</a> | <a href="#">785.4187</a>  | <a href="#">2353.2343</a> | <a href="#">2353.2642</a> | <a href="#">-12.70</a> | <a href="#">0</a> | <a href="#">64</a>   | <a href="#">1.6e-005</a> | <a href="#">1</a> | <a href="#">K.GSLPPAALEPQTTVIHNVPDGIK.E</a>                  |
| <input checked="" type="checkbox"/> | <a href="#">649</a> | <a href="#">785.4208</a>  | <a href="#">2353.2406</a> | <a href="#">2353.2642</a> | <a href="#">-10.02</a> | <a href="#">0</a> | <a href="#">(62)</a> | <a href="#">2.2e-005</a> | <a href="#">1</a> | <a href="#">K.GSLPPAALEPQTTVIHNVPDGIK.E</a>                  |
| <input checked="" type="checkbox"/> | <a href="#">650</a> | <a href="#">785.4230</a>  | <a href="#">2353.2472</a> | <a href="#">2353.2642</a> | <a href="#">-7.22</a>  | <a href="#">0</a> | <a href="#">(44)</a> | <a href="#">0.0014</a>   | <a href="#">1</a> | <a href="#">K.GSLPPAALEPQTTVIHNVPDGIK.E</a>                  |
| <input checked="" type="checkbox"/> | <a href="#">651</a> | <a href="#">785.4244</a>  | <a href="#">2353.2514</a> | <a href="#">2353.2642</a> | <a href="#">-5.43</a>  | <a href="#">0</a> | <a href="#">(40)</a> | <a href="#">0.0036</a>   | <a href="#">1</a> | <a href="#">K.GSLPPAALEPQTTVIHNVPDGIK.E</a>                  |
| <input checked="" type="checkbox"/> | <a href="#">652</a> | <a href="#">790.3753</a>  | <a href="#">2368.1041</a> | <a href="#">2368.1250</a> | <a href="#">-8.85</a>  | <a href="#">0</a> | <a href="#">(85)</a> | <a href="#">1.2e-007</a> | <a href="#">1</a> | <a href="#">R.QTTAPATMSTAASGTTMGLVEQAK.S + Oxidation (M)</a> |
| <input checked="" type="checkbox"/> | <a href="#">653</a> | <a href="#">790.3780</a>  | <a href="#">2368.1122</a> | <a href="#">2368.1250</a> | <a href="#">-5.43</a>  | <a href="#">0</a> | <a href="#">(79)</a> | <a href="#">4.5e-007</a> | <a href="#">1</a> | <a href="#">R.QTTAPATMSTAASGTTMGLVEQAK.S + Oxidation (M)</a> |

## Proteins matching the same set of peptides:

IPI00875723 Mass: 68686 Score: 978 Queries matched: 66  
 Tax\_Id=10090 Gene\_Symbol=Camk2b 68 kDa protein

## 3. IPI00112584 Mass: 56961 Score: 636 Queries matched: 57 emPAI: 0.48

Tax\_Id=10090 Gene\_Symbol=Camk2d Isoform 1 of Calcium/calmodulin-dependent protein kinase type II subunit delta

Check to include this hit in error tolerant search or archive report

| Query                               | Observed                  | Mr(expt)                  | Mr(calc)                  | ppm                       | Miss                 | Score                | Expect                   | Rank                     | Peptide                                    |                                   |
|-------------------------------------|---------------------------|---------------------------|---------------------------|---------------------------|----------------------|----------------------|--------------------------|--------------------------|--------------------------------------------|-----------------------------------|
| <a href="#">33</a>                  | <a href="#">602.3627</a>  | <a href="#">601.3554</a>  | <a href="#">601.3435</a>  | <a href="#">19.8</a>      | <a href="#">0</a>    | <a href="#">20</a>   | <a href="#">1.6</a>      | <a href="#">1</a>        | <a href="#">K.DLINK.M</a>                  |                                   |
| <a href="#">126</a>                 | <a href="#">463.2444</a>  | <a href="#">924.4742</a>  | <a href="#">924.4777</a>  | <a href="#">-3.74</a>     | <a href="#">1</a>    | <a href="#">11</a>   | <a href="#">5.1</a>      | <a href="#">1</a>        | <a href="#">R.DHQKLER.E</a>                |                                   |
| <input checked="" type="checkbox"/> | <a href="#">241</a>       | <a href="#">539.2839</a>  | <a href="#">1076.5532</a> | <a href="#">2.83</a>      | <a href="#">0</a>    | <a href="#">10</a>   | <a href="#">8.9</a>      | <a href="#">1</a>        | <a href="#">K.IPTGQYAAK.I</a>              |                                   |
| <a href="#">280</a>                 | <a href="#">574.3269</a>  | <a href="#">1146.6392</a> | <a href="#">1146.6431</a> | <a href="#">-3.33</a>     | <a href="#">0</a>    | <a href="#">(48)</a> | <a href="#">0.00085</a>  | <a href="#">1</a>        | <a href="#">K.GAILTTMLATR.N</a>            |                                   |
| <a href="#">281</a>                 | <a href="#">574.3270</a>  | <a href="#">1146.6394</a> | <a href="#">1146.6431</a> | <a href="#">-3.16</a>     | <a href="#">0</a>    | <a href="#">54</a>   | <a href="#">0.00024</a>  | <a href="#">1</a>        | <a href="#">K.GAILTTMLATR.N</a>            |                                   |
| <a href="#">282</a>                 | <a href="#">574.3282</a>  | <a href="#">1146.6418</a> | <a href="#">1146.6431</a> | <a href="#">-1.06</a>     | <a href="#">0</a>    | <a href="#">(46)</a> | <a href="#">0.0015</a>   | <a href="#">1</a>        | <a href="#">K.GAILTTMLATR.N</a>            |                                   |
| <input checked="" type="checkbox"/> | <a href="#">366</a>       | <a href="#">664.3086</a>  | <a href="#">1326.6026</a> | <a href="#">1326.5948</a> | <a href="#">5.91</a> | <a href="#">0</a>    | <a href="#">59</a>       | <a href="#">6.2e-005</a> | <a href="#">1</a>                          | <a href="#">R.LTYMDGSGMPK.T</a>   |
| <input checked="" type="checkbox"/> | <a href="#">367</a>       | <a href="#">664.3100</a>  | <a href="#">1326.6054</a> | <a href="#">1326.5948</a> | <a href="#">8.02</a> | <a href="#">0</a>    | <a href="#">(46)</a>     | <a href="#">0.0015</a>   | <a href="#">1</a>                          | <a href="#">R.LTYMDGSGMPK.T</a>   |
| <a href="#">370</a>                 | <a href="#">670.8879</a>  | <a href="#">1339.7612</a> | <a href="#">1339.7711</a> | <a href="#">-7.33</a>     | <a href="#">0</a>    | <a href="#">(37)</a> | <a href="#">0.0084</a>   | <a href="#">1</a>        | <a href="#">R.DLKPENLLASK.S</a>            |                                   |
| <a href="#">371</a>                 | <a href="#">670.8884</a>  | <a href="#">1339.7622</a> | <a href="#">1339.7711</a> | <a href="#">-6.59</a>     | <a href="#">0</a>    | <a href="#">(26)</a> | <a href="#">0.11</a>     | <a href="#">1</a>        | <a href="#">R.DLKPENLLASK.S</a>            |                                   |
| <a href="#">372</a>                 | <a href="#">670.8900</a>  | <a href="#">1339.7654</a> | <a href="#">1339.7711</a> | <a href="#">-4.20</a>     | <a href="#">0</a>    | <a href="#">(26)</a> | <a href="#">0.1</a>      | <a href="#">1</a>        | <a href="#">R.DLKPENLLASK.S</a>            |                                   |
| <a href="#">373</a>                 | <a href="#">670.8904</a>  | <a href="#">1339.7662</a> | <a href="#">1339.7711</a> | <a href="#">-3.60</a>     | <a href="#">0</a>    | <a href="#">(41)</a> | <a href="#">0.0029</a>   | <a href="#">1</a>        | <a href="#">R.DLKPENLLASK.S</a>            |                                   |
| <a href="#">374</a>                 | <a href="#">670.8911</a>  | <a href="#">1339.7676</a> | <a href="#">1339.7711</a> | <a href="#">-2.56</a>     | <a href="#">0</a>    | <a href="#">67</a>   | <a href="#">7.6e-006</a> | <a href="#">1</a>        | <a href="#">R.DLKPENLLASK.S</a>            |                                   |
| <a href="#">375</a>                 | <a href="#">670.8915</a>  | <a href="#">1339.7684</a> | <a href="#">1339.7711</a> | <a href="#">-1.96</a>     | <a href="#">0</a>    | <a href="#">(39)</a> | <a href="#">0.0044</a>   | <a href="#">1</a>        | <a href="#">R.DLKPENLLASK.S</a>            |                                   |
| <a href="#">376</a>                 | <a href="#">670.8923</a>  | <a href="#">1339.7700</a> | <a href="#">1339.7711</a> | <a href="#">-0.76</a>     | <a href="#">0</a>    | <a href="#">(27)</a> | <a href="#">0.069</a>    | <a href="#">1</a>        | <a href="#">R.DLKPENLLASK.S</a>            |                                   |
| <a href="#">377</a>                 | <a href="#">670.8923</a>  | <a href="#">1339.7700</a> | <a href="#">1339.7711</a> | <a href="#">-0.76</a>     | <a href="#">0</a>    | <a href="#">(34)</a> | <a href="#">0.015</a>    | <a href="#">1</a>        | <a href="#">R.DLKPENLLASK.S</a>            |                                   |
| <a href="#">378</a>                 | <a href="#">670.8926</a>  | <a href="#">1339.7706</a> | <a href="#">1339.7711</a> | <a href="#">-0.32</a>     | <a href="#">0</a>    | <a href="#">(45)</a> | <a href="#">0.0012</a>   | <a href="#">1</a>        | <a href="#">R.DLKPENLLASK.S</a>            |                                   |
| <a href="#">379</a>                 | <a href="#">670.8926</a>  | <a href="#">1339.7706</a> | <a href="#">1339.7711</a> | <a href="#">-0.32</a>     | <a href="#">0</a>    | <a href="#">(39)</a> | <a href="#">0.0046</a>   | <a href="#">1</a>        | <a href="#">R.DLKPENLLASK.S</a>            |                                   |
| <a href="#">380</a>                 | <a href="#">670.8930</a>  | <a href="#">1339.7714</a> | <a href="#">1339.7711</a> | <a href="#">0.28</a>      | <a href="#">0</a>    | <a href="#">(36)</a> | <a href="#">0.01</a>     | <a href="#">1</a>        | <a href="#">R.DLKPENLLASK.S</a>            |                                   |
| <a href="#">381</a>                 | <a href="#">670.8934</a>  | <a href="#">1339.7722</a> | <a href="#">1339.7711</a> | <a href="#">0.88</a>      | <a href="#">0</a>    | <a href="#">(35)</a> | <a href="#">0.011</a>    | <a href="#">1</a>        | <a href="#">R.DLKPENLLASK.S</a>            |                                   |
| <a href="#">382</a>                 | <a href="#">670.8936</a>  | <a href="#">1339.7726</a> | <a href="#">1339.7711</a> | <a href="#">1.18</a>      | <a href="#">0</a>    | <a href="#">(32)</a> | <a href="#">0.026</a>    | <a href="#">1</a>        | <a href="#">R.DLKPENLLASK.S</a>            |                                   |
| <a href="#">383</a>                 | <a href="#">670.8938</a>  | <a href="#">1339.7730</a> | <a href="#">1339.7711</a> | <a href="#">1.47</a>      | <a href="#">0</a>    | <a href="#">(28)</a> | <a href="#">0.054</a>    | <a href="#">1</a>        | <a href="#">R.DLKPENLLASK.S</a>            |                                   |
| <a href="#">384</a>                 | <a href="#">670.8939</a>  | <a href="#">1339.7732</a> | <a href="#">1339.7711</a> | <a href="#">1.62</a>      | <a href="#">0</a>    | <a href="#">(47)</a> | <a href="#">0.00072</a>  | <a href="#">1</a>        | <a href="#">R.DLKPENLLASK.S</a>            |                                   |
| <a href="#">385</a>                 | <a href="#">670.8940</a>  | <a href="#">1339.7734</a> | <a href="#">1339.7711</a> | <a href="#">1.77</a>      | <a href="#">0</a>    | <a href="#">(1)</a>  | <a href="#">30</a>       | <a href="#">9</a>        | <a href="#">R.DLKPENLLASK.S</a>            |                                   |
| <a href="#">386</a>                 | <a href="#">670.8944</a>  | <a href="#">1339.7742</a> | <a href="#">1339.7711</a> | <a href="#">2.37</a>      | <a href="#">0</a>    | <a href="#">(32)</a> | <a href="#">0.02</a>     | <a href="#">1</a>        | <a href="#">R.DLKPENLLASK.S</a>            |                                   |
| <a href="#">387</a>                 | <a href="#">670.8953</a>  | <a href="#">1339.7760</a> | <a href="#">1339.7711</a> | <a href="#">3.71</a>      | <a href="#">0</a>    | <a href="#">(47)</a> | <a href="#">0.00064</a>  | <a href="#">1</a>        | <a href="#">R.DLKPENLLASK.S</a>            |                                   |
| <a href="#">388</a>                 | <a href="#">670.8953</a>  | <a href="#">1339.7760</a> | <a href="#">1339.7711</a> | <a href="#">3.71</a>      | <a href="#">0</a>    | <a href="#">(47)</a> | <a href="#">0.00077</a>  | <a href="#">1</a>        | <a href="#">R.DLKPENLLASK.S</a>            |                                   |
| <a href="#">389</a>                 | <a href="#">670.8954</a>  | <a href="#">1339.7762</a> | <a href="#">1339.7711</a> | <a href="#">3.86</a>      | <a href="#">0</a>    | <a href="#">(21)</a> | <a href="#">0.31</a>     | <a href="#">1</a>        | <a href="#">R.DLKPENLLASK.S</a>            |                                   |
| <a href="#">390</a>                 | <a href="#">670.8956</a>  | <a href="#">1339.7766</a> | <a href="#">1339.7711</a> | <a href="#">4.16</a>      | <a href="#">0</a>    | <a href="#">(38)</a> | <a href="#">0.006</a>    | <a href="#">1</a>        | <a href="#">R.DLKPENLLASK.S</a>            |                                   |
| <input checked="" type="checkbox"/> | <a href="#">492</a>       | <a href="#">809.8878</a>  | <a href="#">1617.7610</a> | <a href="#">1617.7562</a> | <a href="#">2.97</a> | <a href="#">0</a>    | <a href="#">64</a>       | <a href="#">2e-005</a>   | <a href="#">1</a>                          | <a href="#">R.FTDEYQLFEELGK.G</a> |
| <input checked="" type="checkbox"/> | <a href="#">493</a>       | <a href="#">809.8892</a>  | <a href="#">1617.7638</a> | <a href="#">1617.7562</a> | <a href="#">4.70</a> | <a href="#">0</a>    | <a href="#">(49)</a>     | <a href="#">0.00078</a>  | <a href="#">1</a>                          | <a href="#">R.FTDEYQLFEELGK.G</a> |
| <a href="#">578</a>                 | <a href="#">694.3150</a>  | <a href="#">2079.9232</a> | <a href="#">2079.9426</a> | <a href="#">-9.32</a>     | <a href="#">0</a>    | <a href="#">75</a>   | <a href="#">1e-006</a>   | <a href="#">1</a>        | <a href="#">K.AGAYDFPSPWDVTPEAK.D</a>      |                                   |
| <a href="#">579</a>                 | <a href="#">694.3163</a>  | <a href="#">2079.9271</a> | <a href="#">2079.9426</a> | <a href="#">-7.44</a>     | <a href="#">0</a>    | <a href="#">(64)</a> | <a href="#">1.4e-005</a> | <a href="#">1</a>        | <a href="#">K.AGAYDFPSPWDVTPEAK.D</a>      |                                   |
| <a href="#">580</a>                 | <a href="#">1040.9812</a> | <a href="#">2079.9478</a> | <a href="#">2079.9426</a> | <a href="#">2.55</a>      | <a href="#">0</a>    | <a href="#">(28)</a> | <a href="#">0.064</a>    | <a href="#">1</a>        | <a href="#">K.AGAYDFPSPWDVTPEAK.D</a>      |                                   |
| <a href="#">581</a>                 | <a href="#">1040.9817</a> | <a href="#">2079.9488</a> | <a href="#">2079.9426</a> | <a href="#">3.03</a>      | <a href="#">0</a>    | <a href="#">(51)</a> | <a href="#">0.00036</a>  | <a href="#">1</a>        | <a href="#">K.AGAYDFPSPWDVTPEAK.D</a>      |                                   |
| <a href="#">582</a>                 | <a href="#">1040.9819</a> | <a href="#">2079.9492</a> | <a href="#">2079.9426</a> | <a href="#">3.22</a>      | <a href="#">0</a>    | <a href="#">(60)</a> | <a href="#">4.1e-005</a> | <a href="#">1</a>        | <a href="#">K.AGAYDFPSPWDVTPEAK.D</a>      |                                   |
| <a href="#">583</a>                 | <a href="#">1040.9828</a> | <a href="#">2079.9510</a> | <a href="#">2079.9426</a> | <a href="#">4.09</a>      | <a href="#">0</a>    | <a href="#">(58)</a> | <a href="#">6.4e-005</a> | <a href="#">1</a>        | <a href="#">K.AGAYDFPSPWDVTPEAK.D</a>      |                                   |
| <a href="#">584</a>                 | <a href="#">1040.9840</a> | <a href="#">2079.9534</a> | <a href="#">2079.9426</a> | <a href="#">5.24</a>      | <a href="#">0</a>    | <a href="#">(36)</a> | <a href="#">0.01</a>     | <a href="#">1</a>        | <a href="#">K.AGAYDFPSPWDVTPEAK.D</a>      |                                   |
| <a href="#">657</a>                 | <a href="#">888.7528</a>  | <a href="#">2663.2366</a> | <a href="#">2663.2755</a> | <a href="#">-14.62</a>    | <a href="#">1</a>    | <a href="#">(19)</a> | <a href="#">0.51</a>     | <a href="#">1</a>        | <a href="#">K.AGAYDFPSPWDVTPEAKDLINK.M</a> |                                   |
| <a href="#">658</a>                 | <a href="#">888.7558</a>  | <a href="#">2663.2456</a> | <a href="#">2663.2755</a> | <a href="#">-11.24</a>    | <a href="#">1</a>    | <a href="#">(7)</a>  | <a href="#">7.8</a>      | <a href="#">2</a>        | <a href="#">K.AGAYDFPSPWDVTPEAKDLINK.M</a> |                                   |
| <a href="#">659</a>                 | <a href="#">888.7559</a>  | <a href="#">2663.2459</a> | <a href="#">2663.2755</a> | <a href="#">-11.12</a>    | <a href="#">1</a>    | <a href="#">(26)</a> | <a href="#">0.11</a>     | <a href="#">1</a>        | <a href="#">K.AGAYDFPSPWDVTPEAKDLINK.M</a> |                                   |
| <a href="#">660</a>                 | <a href="#">888.7564</a>  | <a href="#">2663.2474</a> | <a href="#">2663.2755</a> | <a href="#">-10.56</a>    | <a href="#">1</a>    | <a href="#">(47)</a> | <a href="#">0.00075</a>  | <a href="#">1</a>        | <a href="#">K.AGAYDFPSPWDVTPEAKDLINK.M</a> |                                   |
| <a href="#">661</a>                 | <a href="#">888.7583</a>  | <a href="#">2663.2531</a> | <a href="#">2663.2755</a> | <a href="#">-8.42</a>     | <a href="#">1</a>    | <a href="#">(17)</a> | <a href="#">0.87</a>     | <a href="#">1</a>        | <a href="#">K.AGAYDFPSPWDVTPEAKDLINK.M</a> |                                   |
| <a href="#">662</a>                 | <a href="#">888.7584</a>  | <a href="#">2663.2534</a> | <a href="#">2663.2755</a> | <a href="#">-8.31</a>     | <a href="#">1</a>    | <a href="#">(63)</a> | <a href="#">1.9e-005</a> | <a href="#">1</a>        | <a href="#">K.AGAYDFPSPWDVTPEAKDLINK.M</a> |                                   |
| <a href="#">663</a>                 | <a href="#">888.7586</a>  | <a href="#">2663.2540</a> | <a href="#">2663.2755</a> | <a href="#">-8.08</a>     | <a href="#">1</a>    | <a href="#">(54)</a> | <a href="#">0.00018</a>  | <a href="#">1</a>        | <a href="#">K.AGAYDFPSPWDVTPEAKDLINK.M</a> |                                   |
| <a href="#">664</a>                 | <a href="#">888.7588</a>  | <a href="#">2663.2546</a> | <a href="#">2663.2755</a> | <a href="#">-7.86</a>     | <a href="#">1</a>    | <a href="#">(63)</a> | <a href="#">2e-005</a>   | <a href="#">1</a>        | <a href="#">K.AGAYDFPSPWDVTPEAKDLINK.M</a> |                                   |
| <a href="#">665</a>                 | <a href="#">888.7589</a>  | <a href="#">2663.2549</a> | <a href="#">2663.2755</a> | <a href="#">-7.74</a>     | <a href="#">1</a>    | <a href="#">(64)</a> | <a href="#">1.8e-005</a> | <a href="#">1</a>        | <a href="#">K.AGAYDFPSPWDVTPEAKDLINK.M</a> |                                   |
| <a href="#">666</a>                 |                           |                           |                           |                           |                      |                      |                          |                          |                                            |                                   |

|                     |          |           |           |       |   |      |        |   |                             |
|---------------------|----------|-----------|-----------|-------|---|------|--------|---|-----------------------------|
| <a href="#">671</a> | 888.7599 | 2663.2579 | 2663.2755 | -6.62 | 1 | (21) | 0.33   | 1 | K.AGAYDFPSPEDTITPEAKDLINK.M |
| <a href="#">672</a> | 888.7599 | 2663.2579 | 2663.2755 | -6.62 | 1 | (4)  | 15     | 1 | K.AGAYDFPSPEDTITPEAKDLINK.M |
| <a href="#">674</a> | 888.7605 | 2663.2597 | 2663.2755 | -5.94 | 1 | (28) | 0.072  | 1 | K.AGAYDFPSPEDTITPEAKDLINK.M |
| <a href="#">675</a> | 888.7608 | 2663.2606 | 2663.2755 | -5.60 | 1 | (67) | 8e-006 | 1 | K.AGAYDFPSPEDTITPEAKDLINK.M |
| <a href="#">676</a> | 888.7608 | 2663.2606 | 2663.2755 | -5.60 | 1 | (27) | 0.086  | 1 | K.AGAYDFPSPEDTITPEAKDLINK.M |

## Proteins matching the same set of peptides:

|                             |                    |                                                                             |                                                                      |
|-----------------------------|--------------------|-----------------------------------------------------------------------------|----------------------------------------------------------------------|
| <a href="#">IPI00406790</a> | Mass: 60593        | Score: 636                                                                  | Queries matched: 57                                                  |
| Tax_Id=10090                | Gene_Symbol=Camk2d | Isoform 4                                                                   | of Calcium/calmodulin-dependent protein kinase type II subunit delta |
| <a href="#">IPI00475044</a> | Mass: 55899        | Score: 636                                                                  | Queries matched: 57                                                  |
| Tax_Id=10090                | Gene_Symbol=Camk2d | Isoform 2                                                                   | of Calcium/calmodulin-dependent protein kinase type II subunit delta |
| <a href="#">IPI00828919</a> | Mass: 58492        | Score: 636                                                                  | Queries matched: 57                                                  |
| Tax_Id=10090                | Gene_Symbol=Camk2d | Isoform 3                                                                   | of Calcium/calmodulin-dependent protein kinase type II subunit delta |
| <a href="#">IPI00857865</a> | Mass: 54664        | Score: 636                                                                  | Queries matched: 57                                                  |
| Tax_Id=10090                | Gene_Symbol=Camk2d | Putative uncharacterized protein                                            |                                                                      |
| <a href="#">IPI00858128</a> | Mass: 58283        | Score: 636                                                                  | Queries matched: 57                                                  |
| Tax_Id=10090                | Gene_Symbol=Camk2d | calcium/calmodulin-dependent protein kinase type II subunit delta isoform 1 |                                                                      |
| <a href="#">IPI00858144</a> | Mass: 55828        | Score: 636                                                                  | Queries matched: 57                                                  |
| Tax_Id=10090                | Gene_Symbol=Camk2d | 55 kDa protein                                                              |                                                                      |

4. [IPI00124695](#) Mass: 60254 Score: 516 Queries matched: 39 emPAI: 0.30  
 Tax\_Id=10090 Gene\_Symbol=Camk2g Isoform 1 of Calcium/calmodulin-dependent protein kinase type II subunit gamma

Check to include this hit in error tolerant search or archive report

| Query                                                   | Observed        | Mr(expt)         | Mr(calc)         | ppm         | Miss     | Score       | Expect          | Rank     | Peptide                  |
|---------------------------------------------------------|-----------------|------------------|------------------|-------------|----------|-------------|-----------------|----------|--------------------------|
| <a href="#">126</a>                                     | 463.2444        | 924.4742         | 924.4777         | -3.74       | 1        | 11          | 5.1             | 1        | R.DHQKLER.E              |
| <a href="#">132</a>                                     | 469.2222        | 936.4298         | 936.4148         | 16.0        | 0        | 26          | 0.16            | 1        | R.TSQSEETR.V             |
| <input checked="" type="checkbox"/> <a href="#">165</a> | <b>499.7433</b> | <b>997.4720</b>  | <b>997.4716</b>  | <b>0.43</b> | <b>0</b> | <b>23</b>   | <b>0.27</b>     | <b>1</b> | <b>K.TSTQYAAK.I</b>      |
| <a href="#">370</a>                                     | 670.8879        | 1339.7612        | 1339.7711        | -7.33       | 0        | (37)        | 0.0084          | 1        | R.DLKPENLLLASK.C         |
| <a href="#">371</a>                                     | 670.8884        | 1339.7622        | 1339.7711        | -6.59       | 0        | (26)        | 0.11            | 1        | R.DLKPENLLLASK.C         |
| <a href="#">372</a>                                     | 670.8900        | 1339.7654        | 1339.7711        | -4.20       | 0        | (26)        | 0.1             | 1        | R.DLKPENLLLASK.C         |
| <a href="#">373</a>                                     | 670.8904        | 1339.7662        | 1339.7711        | -3.60       | 0        | (41)        | 0.0029          | 1        | R.DLKPENLLLASK.C         |
| <a href="#">374</a>                                     | 670.8911        | 1339.7676        | 1339.7711        | -2.56       | 0        | 67          | 7.6e-006        | 1        | R.DLKPENLLLASK.C         |
| <a href="#">375</a>                                     | 670.8915        | 1339.7684        | 1339.7711        | -1.96       | 0        | (39)        | 0.0044          | 1        | R.DLKPENLLLASK.C         |
| <a href="#">376</a>                                     | 670.8923        | 1339.7700        | 1339.7711        | -0.76       | 0        | (27)        | 0.069           | 1        | R.DLKPENLLLASK.C         |
| <a href="#">377</a>                                     | 670.8923        | 1339.7700        | 1339.7711        | -0.76       | 0        | (34)        | 0.015           | 1        | R.DLKPENLLLASK.C         |
| <a href="#">378</a>                                     | 670.8926        | 1339.7706        | 1339.7711        | -0.32       | 0        | (45)        | 0.0012          | 1        | R.DLKPENLLLASK.C         |
| <a href="#">379</a>                                     | 670.8926        | 1339.7706        | 1339.7711        | -0.32       | 0        | (39)        | 0.0046          | 1        | R.DLKPENLLLASK.C         |
| <a href="#">380</a>                                     | 670.8930        | 1339.7714        | 1339.7711        | 0.28        | 0        | (36)        | 0.01            | 1        | R.DLKPENLLLASK.C         |
| <a href="#">381</a>                                     | 670.8934        | 1339.7722        | 1339.7711        | 0.88        | 0        | (35)        | 0.011           | 1        | R.DLKPENLLLASK.C         |
| <a href="#">382</a>                                     | 670.8936        | 1339.7726        | 1339.7711        | 1.18        | 0        | (32)        | 0.026           | 1        | R.DLKPENLLLASK.C         |
| <a href="#">383</a>                                     | 670.8938        | 1339.7730        | 1339.7711        | 1.47        | 0        | (28)        | 0.054           | 1        | R.DLKPENLLLASK.C         |
| <a href="#">384</a>                                     | 670.8939        | 1339.7732        | 1339.7711        | 1.62        | 0        | (47)        | 0.00072         | 1        | R.DLKPENLLLASK.C         |
| <a href="#">385</a>                                     | 670.8940        | 1339.7734        | 1339.7711        | 1.77        | 0        | (1)         | 30              | 9        | R.DLKPENLLLASK.C         |
| <a href="#">386</a>                                     | 670.8944        | 1339.7742        | 1339.7711        | 2.37        | 0        | (32)        | 0.02            | 1        | R.DLKPENLLLASK.C         |
| <a href="#">387</a>                                     | 670.8953        | 1339.7760        | 1339.7711        | 3.71        | 0        | (47)        | 0.00064         | 1        | R.DLKPENLLLASK.C         |
| <a href="#">388</a>                                     | 670.8953        | 1339.7760        | 1339.7711        | 3.71        | 0        | (47)        | 0.00077         | 1        | R.DLKPENLLLASK.C         |
| <a href="#">389</a>                                     | 670.8954        | 1339.7762        | 1339.7711        | 3.86        | 0        | (21)        | 0.31            | 1        | R.DLKPENLLLASK.C         |
| <a href="#">390</a>                                     | 670.8956        | 1339.7766        | 1339.7711        | 4.16        | 0        | (38)        | 0.006           | 1        | R.DLKPENLLLASK.C         |
| <a href="#">414</a>                                     | 702.3716        | 1402.7286        | 1402.7317        | -2.18       | 0        | (2)         | 41              | 1        | R.LTQYIDGQGRPR.T         |
| <a href="#">415</a>                                     | 702.3759        | 1402.7372        | 1402.7317        | 3.95        | 0        | 5           | 23              | 2        | R.LTQYIDGQGRPR.T         |
| <a href="#">429</a>                                     | 735.4117        | 1468.8088        | 1468.8071        | 1.16        | 0        | (58)        | 6.9e-005        | 1        | K.NLINQMLTINPAK.R        |
| <a href="#">430</a>                                     | 735.4119        | 1468.8092        | 1468.8071        | 1.43        | 0        | (63)        | 2.2e-005        | 1        | K.NLINQMLTINPAK.R        |
| <a href="#">431</a>                                     | 735.4133        | 1468.8120        | 1468.8071        | 3.34        | 0        | (74)        | 2e-006          | 1        | K.NLINQMLTINPAK.R        |
| <a href="#">432</a>                                     | 735.4143        | 1468.8140        | 1468.8071        | 4.70        | 0        | 76          | 1.2e-006        | 1        | K.NLINQMLTINPAK.R        |
| <input checked="" type="checkbox"/> <a href="#">484</a> | <b>802.8825</b> | <b>1603.7504</b> | <b>1603.7406</b> | <b>6.14</b> | <b>0</b> | <b>(68)</b> | <b>9.3e-006</b> | <b>1</b> | <b>R.FTDDYQLFEELGK.G</b> |
| <input checked="" type="checkbox"/> <a href="#">485</a> | <b>802.8837</b> | <b>1603.7528</b> | <b>1603.7406</b> | <b>7.64</b> | <b>0</b> | <b>69</b>   | <b>7.7e-006</b> | <b>1</b> | <b>R.FTDDYQLFEELGK.G</b> |
| <a href="#">578</a>                                     | 694.3150        | 2079.9232        | 2079.9426        | -9.32       | 0        | 75          | 1e-006          | 1        | K.AGAYDFPSPEDTITPEAK.N   |
| <a href="#">579</a>                                     | 694.3163        | 2079.9271        | 2079.9426        | -7.44       | 0        | (64)        | 1.4e-005        | 1        | K.AGAYDFPSPEDTITPEAK.N   |
| <a href="#">580</a>                                     | 1040.9812       | 2079.9478        | 2079.9426        | 2.55        | 0        | (28)        | 0.064           | 1        | K.AGAYDFPSPEDTITPEAK.N   |
| <a href="#">581</a>                                     | 1040.9817       | 2079.9488        | 2079.9426        | 3.03        | 0        | (51)        | 0.00036         | 1        | K.AGAYDFPSPEDTITPEAK.N   |
| <a href="#">582</a>                                     | 1040.9819       | 2079.9492        | 2079.9426        | 3.22        | 0        | (60)        | 4.1e-005        | 1        | K.AGAYDFPSPEDTITPEAK.N   |
| <a href="#">583</a>                                     | 1040.9828       | 2079.9510        | 2079.9426        | 4.09        | 0        | (58)        | 6.4e-005        | 1        | K.AGAYDFPSPEDTITPEAK.N   |
| <a href="#">584</a>                                     | 1040.9840       | 2079.9534        | 2079.9426        | 5.24        | 0        | (36)        | 0.01            | 1        | K.AGAYDFPSPEDTITPEAK.N   |

## Proteins matching the same set of peptides:

|                             |                    |            |                                                                      |
|-----------------------------|--------------------|------------|----------------------------------------------------------------------|
| <a href="#">IPI00228044</a> | Mass: 59013        | Score: 516 | Queries matched: 39                                                  |
| Tax_Id=10090                | Gene_Symbol=Camk2g | Isoform 2  | of Calcium/calmodulin-dependent protein kinase type II subunit gamma |
| <a href="#">IPI00228045</a> | Mass: 56610        | Score: 516 | Queries matched: 39                                                  |
| Tax_Id=10090                | Gene_Symbol=Camk2g | Isoform 3  | of Calcium/calmodulin-dependent protein kinase type II subunit gamma |

5. [IPI00109073](#) Mass: 50010 Score: 259 Queries matched: 11 emPAI: 0.29

Tax\_Id=10090 Gene\_Symbol=Tubb4 Tubulin beta-4 chain

Check to include this hit in error tolerant search or archive report

| Query                                                   | Observed        | Mr(expt)         | Mr(calc)         | ppm         | Miss     | Score       | Expect          | Rank     | Peptide                                    |
|---------------------------------------------------------|-----------------|------------------|------------------|-------------|----------|-------------|-----------------|----------|--------------------------------------------|
| <input checked="" type="checkbox"/> <a href="#">273</a> | <b>572.3212</b> | <b>1142.6278</b> | <b>1142.6270</b> | <b>0.72</b> | <b>0</b> | <b>42</b>   | <b>0.0049</b>   | <b>1</b> | <b>K.LAVNMVPPFR.L</b>                      |
| <a href="#">317</a>                                     | 615.2972        | 1228.5798        | 1228.5910        | -9.10       | 0        | 1           | 43              | 2        | R.ISEQTAMFR.R                              |
| <input checked="" type="checkbox"/> <a href="#">364</a> | <b>660.3562</b> | <b>1318.6978</b> | <b>1318.6955</b> | <b>1.77</b> | <b>0</b> | <b>85</b>   | <b>2.5e-007</b> | <b>1</b> | <b>R.IMNTFVVPSPK.V</b>                     |
| <input checked="" type="checkbox"/> <a href="#">365</a> | <b>660.3578</b> | <b>1318.7010</b> | <b>1318.6955</b> | <b>4.20</b> | <b>0</b> | <b>(84)</b> | <b>2.7e-007</b> | <b>1</b> | <b>R.IMNTFVVPSPK.V</b>                     |
| <input checked="" type="checkbox"/> <a href="#">481</a> | <b>801.4144</b> | <b>1600.8142</b> | <b>1600.8131</b> | <b>0.74</b> | <b>0</b> | <b>82</b>   | <b>3.6e-007</b> | <b>1</b> | <b>R.AVLVDLEPGTMSVR.S</b>                  |
| <input checked="" type="checkbox"/> <a href="#">482</a> | <b>801.4154</b> | <b>1600.8162</b> | <b>1600.8131</b> | <b>1.99</b> | <b>0</b> | <b>(67)</b> | <b>1.2e-005</b> | <b>1</b> | <b>R.AVLVDLEPGTMSVR.S</b>                  |
| <input checked="" type="checkbox"/> <a href="#">483</a> | <b>801.4161</b> | <b>1600.8176</b> | <b>1600.8131</b> | <b>2.86</b> | <b>0</b> | <b>(60)</b> | <b>5.9e-005</b> | <b>1</b> | <b>R.AVLVDLEPGTMSVR.S</b>                  |
| <input checked="" type="checkbox"/> <a href="#">532</a> | <b>846.4391</b> | <b>1690.8636</b> | <b>1690.8600</b> | <b>2.16</b> | <b>0</b> | <b>(20)</b> | <b>0.66</b>     | <b>1</b> | <b>R.ALTVPPELTQQMFDK.N</b>                 |
| <input checked="" type="checkbox"/> <a href="#">533</a> | <b>846.4404</b> | <b>1690.8662</b> | <b>1690.8600</b> | <b>3.69</b> | <b>0</b> | <b>40</b>   | <b>0.0061</b>   | <b>1</b> | <b>R.ALTVPPELTQQMFDK.N</b>                 |
| <input checked="" type="checkbox"/> <a href="#">534</a> | <b>848.9236</b> | <b>1695.8326</b> | <b>1695.8257</b> | <b>4.12</b> | <b>0</b> | <b>15</b>   | <b>2.1</b>      | <b>1</b> | <b>K.NSSYFVEWIPNVK.T</b>                   |
| <input checked="" type="checkbox"/> <a href="#">537</a> | <b>854.4365</b> | <b>1706.8584</b> | <b>1706.8549</b> | <b>2.07</b> | <b>0</b> | <b>(30)</b> | <b>0.064</b>    | <b>2</b> | <b>R.ALTVPPELTQQMFDK.N + Oxidation (M)</b> |

## Proteins matching the same set of peptides:

[IPI00169463](#) Mass: 50255 Score: 259 Queries matched: 11  
Tax\_Id=10090 Gene\_Symbol=Tubb2c Tubulin beta-2C chain

6. [IPI00115546](#) Mass: 40524 Score: 227 Queries matched: 5 emPAI: 0.27  
Tax\_Id=10090 Gene\_Symbol=Gnaol Isoform Alpha-2 of Guanine nucleotide-binding protein G(o) subunit alpha

Check to include this hit in error tolerant search or archive report

| Query                                                   | Observed | Mr(expt)  | Mr(calc)  | ppm   | Miss | Score | Expect   | Rank | Peptide               |
|---------------------------------------------------------|----------|-----------|-----------|-------|------|-------|----------|------|-----------------------|
| <input checked="" type="checkbox"/> <a href="#">203</a> | 529.3122 | 1056.6098 | 1056.6179 | -7.61 | 0    | (18)  | 0.98     | 1    | K.LLLLGGESGK.S        |
| <input checked="" type="checkbox"/> <a href="#">204</a> | 529.3124 | 1056.6102 | 1056.6179 | -7.23 | 0    | 44    | 0.0026   | 1    | K.LLLLGGESGK.S        |
| <input checked="" type="checkbox"/> <a href="#">531</a> | 838.4189 | 1674.8232 | 1674.8213 | 1.16  | 0    | 113   | 3.4e-010 | 1    | R.IGAGDYQPTQDILR.T    |
| <input checked="" type="checkbox"/> <a href="#">570</a> | 979.4428 | 1956.8710 | 1956.8631 | 4.07  | 0    | 87    | 7.1e-008 | 1    | R.MEDTEFFSAELLSAMMR.L |
| <input checked="" type="checkbox"/> <a href="#">571</a> | 979.4498 | 1956.8850 | 1956.8631 | 11.2  | 0    | (83)  | 1.8e-007 | 1    | R.MEDTEFFSAELLSAMMR.L |

## Proteins matching the same set of peptides:

[IPI00230192](#) Mass: 40629 Score: 227 Queries matched: 5  
Tax\_Id=10090 Gene\_Symbol=Gnaol Isoform Alpha-1 of Guanine nucleotide-binding protein G(o) subunit alpha

7. [IPI00323571](#) Mass: 35901 Score: 226 Queries matched: 18 emPAI: 0.86  
Tax\_Id=10090 Gene\_Symbol=ApoE Apolipoprotein E

Check to include this hit in error tolerant search or archive report

| Query                                                   | Observed  | Mr(expt)  | Mr(calc)  | ppm   | Miss | Score | Expect   | Rank | Peptide                               |
|---------------------------------------------------------|-----------|-----------|-----------|-------|------|-------|----------|------|---------------------------------------|
| <input checked="" type="checkbox"/> <a href="#">152</a> | 484.7774  | 967.5402  | 967.5451  | -4.99 | 0    | (50)  | 0.00041  | 1    | R.LGPLVEQGR.Q                         |
| <input checked="" type="checkbox"/> <a href="#">153</a> | 484.7776  | 967.5406  | 967.5451  | -4.57 | 0    | 52    | 0.00027  | 1    | R.LGPLVEQGR.Q                         |
| <input checked="" type="checkbox"/> <a href="#">155</a> | 487.7528  | 973.4910  | 973.4828  | 8.42  | 1    | 46    | 0.0023   | 1    | R.DAEDLQKR.L                          |
| <input checked="" type="checkbox"/> <a href="#">184</a> | 510.2458  | 1018.4770 | 1018.4753 | 1.69  | 0    | 56    | 0.00017  | 1    | R.LGADMEDLR.N                         |
| <input checked="" type="checkbox"/> <a href="#">185</a> | 510.2510  | 1018.4874 | 1018.4753 | 11.9  | 0    | (43)  | 0.0033   | 1    | R.LGADMEDLR.N                         |
| <input checked="" type="checkbox"/> <a href="#">187</a> | 510.2557  | 1018.4968 | 1018.4906 | 6.16  | 0    | 15    | 2.6      | 1    | R.QWANLMEK.I                          |
| <input checked="" type="checkbox"/> <a href="#">238</a> | 538.2985  | 1074.5824 | 1074.5822 | 0.26  | 0    | (40)  | 0.0082   | 1    | R.LQAEIFQAR.L                         |
| <input checked="" type="checkbox"/> <a href="#">239</a> | 538.2990  | 1074.5834 | 1074.5822 | 1.19  | 0    | 52    | 0.00055  | 1    | R.LQAEIFQAR.L                         |
| <input checked="" type="checkbox"/> <a href="#">240</a> | 538.3007  | 1074.5868 | 1074.5822 | 4.35  | 0    | (36)  | 0.021    | 1    | R.LQAEIFQAR.L                         |
| <input checked="" type="checkbox"/> <a href="#">287</a> | 581.7828  | 1161.5510 | 1161.5448 | 5.38  | 0    | (42)  | 0.0051   | 1    | K.MEEQTQAIR.L                         |
| <input checked="" type="checkbox"/> <a href="#">288</a> | 581.7836  | 1161.5526 | 1161.5448 | 6.76  | 0    | (42)  | 0.0053   | 1    | K.MEEQTQAIR.L                         |
| <input checked="" type="checkbox"/> <a href="#">289</a> | 581.7837  | 1161.5528 | 1161.5448 | 6.93  | 0    | (24)  | 0.3      | 1    | K.MEEQTQAIR.L                         |
| <input checked="" type="checkbox"/> <a href="#">290</a> | 581.7856  | 1161.5566 | 1161.5448 | 10.2  | 0    | 49    | 0.001    | 1    | K.MEEQTQAIR.L                         |
| <input checked="" type="checkbox"/> <a href="#">479</a> | 800.4014  | 1598.7882 | 1598.7787 | 5.94  | 0    | 63    | 2.9e-005 | 1    | K.ELEEQLGPVAETR.A                     |
| <input checked="" type="checkbox"/> <a href="#">480</a> | 800.4103  | 1598.8060 | 1598.7787 | 17.1  | 0    | (54)  | 0.00027  | 1    | K.ELEEQLGPVAETR.A                     |
| <input checked="" type="checkbox"/> <a href="#">573</a> | 997.5337  | 1993.0528 | 1993.0480 | 2.43  | 0    | 25    | 0.14     | 1    | K.IQASVATNPIITPVAQENQ.-               |
| <input checked="" type="checkbox"/> <a href="#">702</a> | 1308.9537 | 3923.8393 | 3923.8656 | -6.72 | 0    | 32    | 0.01     | 1    | R.WVQTLSDQVQELQSSQVTQELTALMEDMTTEVK.A |
| <input checked="" type="checkbox"/> <a href="#">705</a> | 1308.9666 | 3923.8780 | 3923.8656 | 3.15  | 0    | (10)  | 1.8      | 1    | R.WVQTLSDQVQELQSSQVTQELTALMEDMTTEVK.A |

8. [IPI00112251](#) Mass: 50842 Score: 198 Queries matched: 12 emPAI: 0.29

Tax\_Id=10090 Gene\_Symbol=Tubb3 Tubulin beta-3 chain

Check to include this hit in error tolerant search or archive report

| Query                                                   | Observed | Mr(expt)  | Mr(calc)  | ppm    | Miss | Score | Expect   | Rank | Peptide                            |
|---------------------------------------------------------|----------|-----------|-----------|--------|------|-------|----------|------|------------------------------------|
| <a href="#">273</a>                                     | 572.3212 | 1142.6278 | 1142.6270 | 0.72   | 0    | 42    | 0.0049   | 1    | K.LAVNMVFFPR.L                     |
| <a href="#">317</a>                                     | 615.2972 | 1228.5798 | 1228.5910 | -9.10  | 0    | 1     | 43       | 2    | R.ISEQFTAMFR.R                     |
| <a href="#">364</a>                                     | 660.3562 | 1318.6978 | 1318.6955 | 1.77   | 0    | 85    | 2.5e-007 | 1    | R.IMNTFVSVVPSK.V                   |
| <a href="#">365</a>                                     | 660.3578 | 1318.7010 | 1318.6955 | 4.20   | 0    | (84)  | 2.7e-007 | 1    | R.IMNTFVSVVPSK.V                   |
| <input checked="" type="checkbox"/> <a href="#">486</a> | 808.4135 | 1614.8124 | 1614.8287 | -10.07 | 0    | (41)  | 0.0062   | 1    | R.AILVDLEPGTMSVR.S                 |
| <input checked="" type="checkbox"/> <a href="#">487</a> | 808.4182 | 1614.8218 | 1614.8287 | -4.25  | 0    | (35)  | 0.026    | 1    | R.AILVDLEPGTMSVR.S                 |
| <input checked="" type="checkbox"/> <a href="#">488</a> | 808.4218 | 1614.8290 | 1614.8287 | 0.21   | 0    | 71    | 6.3e-006 | 1    | R.AILVDLEPGTMSVR.S                 |
| <input checked="" type="checkbox"/> <a href="#">497</a> | 816.4215 | 1630.8284 | 1630.8236 | 2.96   | 0    | (31)  | 0.059    | 1    | R.AILVDLEPGTMSVR.S + Oxidation (M) |
| <a href="#">532</a>                                     | 846.4391 | 1690.8636 | 1690.8600 | 2.16   | 0    | (20)  | 0.66     | 1    | R.ALTVPQLTQMFDAK.N                 |
| <a href="#">533</a>                                     | 846.4404 | 1690.8662 | 1690.8600 | 3.69   | 0    | 40    | 0.0061   | 1    | R.ALTVPQLTQMFDAK.N                 |
| <a href="#">534</a>                                     | 848.9236 | 1695.8326 | 1695.8257 | 4.12   | 0    | 15    | 2.1      | 1    | K.NSSYFVWILPNNVK.V                 |
| <a href="#">537</a>                                     | 854.4365 | 1706.8584 | 1706.8549 | 2.07   | 0    | (30)  | 0.064    | 2    | R.ALTVPQLTQMFDAK.N + Oxidation (M) |

9. [IPI00110850](#) Mass: 42052 Score: 175 Queries matched: 9 emPAI: 0.35

Tax\_Id=10090 Gene\_Symbol=Actb Actin, cytoplasmic 1

Check to include this hit in error tolerant search or archive report

| Query                                                   | Observed | Mr(expt)  | Mr(calc)  | ppm    | Miss | Score | Expect   | Rank | Peptide                |
|---------------------------------------------------------|----------|-----------|-----------|--------|------|-------|----------|------|------------------------|
| <input checked="" type="checkbox"/> <a href="#">285</a> | 581.3162 | 1160.6178 | 1160.6111 | 5.83   | 0    | (27)  | 0.17     | 1    | K.EITALAPSTMK.I        |
| <input checked="" type="checkbox"/> <a href="#">286</a> | 581.3204 | 1160.6262 | 1160.6111 | 13.1   | 0    | 36    | 0.018    | 1    | K.EITALAPSTMK.I        |
| <input checked="" type="checkbox"/> <a href="#">307</a> | 599.7695 | 1197.5244 | 1197.5150 | 7.93   | 0    | 41    | 0.0029   | 1    | K.DSYVGDQAQSK.R        |
| <input checked="" type="checkbox"/> <a href="#">550</a> | 895.9509 | 1789.8872 | 1789.8846 | 1.46   | 0    | 85    | 2e-007   | 1    | K.SYELPDGQVITIGNER.F   |
| <input checked="" type="checkbox"/> <a href="#">551</a> | 895.9536 | 1789.8926 | 1789.8846 | 4.48   | 0    | (73)  | 3.1e-006 | 1    | K.SYELPDGQVITIGNER.F   |
| <input checked="" type="checkbox"/> <a href="#">566</a> | 652.0146 | 1953.0220 | 1953.0571 | -17.99 | 0    | (34)  | 0.019    | 1    | R.VAPEEHPVLLTEAPLNPK.A |
| <input checked="" type="checkbox"/> <a href="#">567</a> | 652.0152 | 1953.0238 | 1953.0571 | -17.06 | 0    | 52    | 0.00028  | 1    | R.VAPEEHPVLLTEAPLNPK.A |
| <input checked="" type="checkbox"/> <a href="#">568</a> | 652.0201 | 1953.0385 | 1953.0571 | -9.54  | 0    | (32)  | 0.028    | 1    | R.VAPEEHPVLLTEAPLNPK.A |
| <input checked="" type="checkbox"/> <a href="#">569</a> | 652.0240 | 1953.0502 | 1953.0571 | -3.55  | 0    | (38)  | 0.0068   | 1    | R.VAPEEHPVLLTEAPLNPK.A |

## Proteins matching the same set of peptides:

[IPI00136929](#) Mass: 44029 Score: 175 Queries matched: 9

Tax\_Id=10090 Gene\_Symbol=Actg1 Gamma actin-like protein

[IPI00473320](#) Mass: 42115 Score: 175 Queries matched: 9

Tax\_Id=10090 Gene\_Symbol=Actb Putative uncharacterized protein  
[IPI00652436](#) Mass: 42053 Score: 175 Queries matched: 9  
 Tax\_Id=10090 Gene\_Symbol=Actg1 Putative uncharacterized protein  
[IPI00874482](#) Mass: 42108 Score: 175 Queries matched: 9  
 Tax\_Id=10090 Gene\_Symbol=Actg1 Actin, cytoplasmic 2

10. [IPI00109061](#) Mass: 50377 Score: 175 Queries matched: 10 emPAI: 0.29  
 Tax\_Id=10090 Gene\_Symbol=Tubb2b Tubulin beta-2B chain

Check to include this hit in error tolerant search or archive report

| Query                                                   | Observed | Mr(expt)  | Mr(calc)  | ppm    | Miss | Score | Expect   | Rank | Peptide                             |
|---------------------------------------------------------|----------|-----------|-----------|--------|------|-------|----------|------|-------------------------------------|
| <a href="#">273</a>                                     | 572.3212 | 1142.6278 | 1142.6270 | 0.72   | 0    | 42    | 0.0049   | 1    | K.LAVNMVPPFR.L                      |
| <a href="#">317</a>                                     | 615.2972 | 1228.5798 | 1228.5910 | -9.10  | 0    | 1     |          | 43   | R.ISEQFTAMFR.R                      |
| <input checked="" type="checkbox"/> <a href="#">397</a> | 676.3429 | 1350.6712 | 1350.6676 | 2.72   | 0    | (67)  | 1.4e-005 | 1    | R.IMNTFSVMPSPK.V                    |
| <input checked="" type="checkbox"/> <a href="#">398</a> | 676.3460 | 1350.6774 | 1350.6676 | 7.31   | 0    | 79    | 1e-006   | 1    | R.IMNTFSVMPSPK.V                    |
| <a href="#">486</a>                                     | 808.4135 | 1614.8124 | 1614.8287 | -10.07 | 0    | (41)  | 0.0062   | 1    | R.AILVDLEPGTMDSVR.S                 |
| <a href="#">487</a>                                     | 808.4182 | 1614.8218 | 1614.8287 | -4.25  | 0    | (35)  | 0.026    | 1    | R.AILVDLEPGTMDSVR.S                 |
| <a href="#">488</a>                                     | 808.4218 | 1614.8290 | 1614.8287 | 0.21   | 0    | 71    | 6.3e-006 | 1    | R.AILVDLEPGTMDSVR.S                 |
| <a href="#">497</a>                                     | 816.4215 | 1630.8284 | 1630.8236 | 2.96   | 0    | (31)  | 0.059    | 1    | R.AILVDLEPGTMDSVR.S + Oxidation (M) |
| <a href="#">534</a>                                     | 848.9236 | 1695.8326 | 1695.8257 | 4.12   | 0    | 15    | 2.1      | 1    | K.NSSYFVEWIPNNVK.T                  |
| <input checked="" type="checkbox"/> <a href="#">537</a> | 854.4365 | 1706.8584 | 1706.8549 | 2.07   | 0    | 43    | 0.0034   | 1    | R.ALTVPQLTQQMFDK.N                  |

Proteins matching the same set of peptides:

[IPI00338039](#) Mass: 50274 Score: 175 Queries matched: 10  
 Tax\_Id=10090 Gene\_Symbol=Tubb2a Tubulin beta-2A chain

11. [IPI00122048](#) Mass: 113045 Score: 171 Queries matched: 5 emPAI: 0.09  
 Tax\_Id=10090 Gene\_Symbol=Atpla3 Sodium/potassium-transporting ATPase subunit alpha-3

Check to include this hit in error tolerant search or archive report

| Query                                                   | Observed | Mr(expt)  | Mr(calc)  | ppm   | Miss | Score | Expect   | Rank | Peptide                  |
|---------------------------------------------------------|----------|-----------|-----------|-------|------|-------|----------|------|--------------------------|
| <input checked="" type="checkbox"/> <a href="#">318</a> | 618.8549 | 1235.6952 | 1235.6986 | -2.72 | 0    | 59    | 4.9e-005 | 1    | R.LNIPVSVQVNP.R.D        |
| <input checked="" type="checkbox"/> <a href="#">319</a> | 618.8561 | 1235.6976 | 1235.6986 | -0.78 | 0    | (36)  | 0.011    | 1    | R.LNIPVSVQVNP.R.D        |
| <input checked="" type="checkbox"/> <a href="#">556</a> | 906.4708 | 1810.9270 | 1810.9425 | -8.54 | 0    | (1)   |          | 51   | R.QGAIIVAVTGDGVNDSPALK.K |
| <input checked="" type="checkbox"/> <a href="#">557</a> | 906.4775 | 1810.9404 | 1810.9425 | -1.14 | 0    | 70    | 6.2e-006 | 1    | R.QGAIIVAVTGDGVNDSPALK.K |
| <input checked="" type="checkbox"/> <a href="#">560</a> | 915.4684 | 1828.9222 | 1828.9167 | 3.06  | 0    | 96    | 1.3e-008 | 1    | K.GVGIISGNETVEDIAR.L     |

Proteins matching the same set of peptides:

[IPI00420569](#) Mass: 113457 Score: 171 Queries matched: 5  
 Tax\_Id=10090 Gene\_Symbol=Atpla2 Sodium/potassium-transporting ATPase subunit alpha-2  
[IPI00752412](#) Mass: 117548 Score: 171 Queries matched: 5  
 Tax\_Id=10090 Gene\_Symbol=Atpla3 ATPase, Na+/K+ transporting, alpha 3 polypeptide, isoform CRA\_c  
[IPI00762871](#) Mass: 104717 Score: 171 Queries matched: 5  
 Tax\_Id=10090 Gene\_Symbol=Atpla2 Uncharacterized protein

12. [IPI00138892](#) Mass: 15004 Score: 170 Queries matched: 3 emPAI: 0.23  
 Tax\_Id=10090 Gene\_Symbol=Uba52 Ubiquitin-60S ribosomal protein L40

Check to include this hit in error tolerant search or archive report

| Query                                                   | Observed | Mr(expt)  | Mr(calc)  | ppm  | Miss | Score | Expect   | Rank | Peptide              |
|---------------------------------------------------------|----------|-----------|-----------|------|------|-------|----------|------|----------------------|
| <input checked="" type="checkbox"/> <a href="#">547</a> | 894.4697 | 1786.9248 | 1786.9200 | 2.71 | 0    | 81    | 4.8e-007 | 1    | K.TITLEVEPSDTIENVK.A |
| <input checked="" type="checkbox"/> <a href="#">548</a> | 894.4703 | 1786.9260 | 1786.9200 | 3.38 | 0    | (78)  | 9.9e-007 | 1    | K.TITLEVEPSDTIENVK.A |
| <input checked="" type="checkbox"/> <a href="#">549</a> | 894.4712 | 1786.9278 | 1786.9200 | 4.38 | 0    | (73)  | 2.8e-006 | 1    | K.TITLEVEPSDTIENVK.A |

Proteins matching the same set of peptides:

[IPI00470152](#) Mass: 18282 Score: 170 Queries matched: 3  
 Tax\_Id=10090 Gene\_Symbol=Rps27a Ubiquitin-40S ribosomal protein S27a  
[IPI00895319](#) Mass: 22277 Score: 170 Queries matched: 3  
 Tax\_Id=10090 Gene\_Symbol=2810422J05Rik 22 kDa protein  
[IPI00895479](#) Mass: 27181 Score: 170 Queries matched: 3  
 Tax\_Id=10090 Gene\_Symbol=2810422J05Rik 27 kDa protein  
[IPI00918763](#) Mass: 11021 Score: 170 Queries matched: 3  
 Tax\_Id=10090 Gene\_Symbol=Uba52 Ubiquitin subunit 1  
[IPI00750889](#) Mass: 22822 Score: 170 Queries matched: 3  
 Tax\_Id=10090 Gene\_Symbol=Ubc Ubc protein  
[IPI00923013](#) Mass: 26603 Score: 170 Queries matched: 3  
 Tax\_Id=10090 Gene\_Symbol=Ubb Ubiquitin B  
[IPI00923037](#) Mass: 22578 Score: 170 Queries matched: 3  
 Tax\_Id=10090 Gene\_Symbol=Ubc Putative uncharacterized protein  
[IPI00139518](#) Mass: 34348 Score: 170 Queries matched: 3  
 Tax\_Id=10090 Gene\_Symbol=Ubb Polyubiquitin-B  
[IPI00755916](#) Mass: 82614 Score: 170 Queries matched: 3  
 Tax\_Id=10090 Gene\_Symbol=Ubc ubiquitin  
[IPI00969323](#) Mass: 82603 Score: 170 Queries matched: 3  
 Tax\_Id=10090 Gene\_Symbol=Ubc Polyubiquitin-C

13. [IPI00120793](#) Mass: 28131 Score: 168 Queries matched: 14 emPAI: 0.40  
 Tax\_Id=10090 Gene\_Symbol=Prnp Major prion protein

Check to include this hit in error tolerant search or archive report

| Query                                                   | Observed | Mr(expt)  | Mr(calc)  | ppm  | Miss | Score | Expect | Rank | Peptide      |
|---------------------------------------------------------|----------|-----------|-----------|------|------|-------|--------|------|--------------|
| <input checked="" type="checkbox"/> <a href="#">242</a> | 544.7363 | 1087.4580 | 1087.4570 | 0.94 | 0    | 43    | 0.0012 | 1    | K.ESQAYDGR.R |
| <input checked="" type="checkbox"/> <a href="#">243</a> | 544.7366 | 1087.4586 | 1087.4570 | 1.49 | 0    | (37)  | 0.0045 | 1    | K.ESQAYDGR.R |
| <input checked="" type="checkbox"/> <a href="#">244</a> | 544.7393 | 1087.4640 | 1087.4570 | 6.45 | 0    | (41)  | 0.0019 | 1    | K.ESQAYDGR.R |

|                                     |                     |          |           |           |      |   |      |          |   |                  |
|-------------------------------------|---------------------|----------|-----------|-----------|------|---|------|----------|---|------------------|
| <input checked="" type="checkbox"/> | <a href="#">245</a> | 544.7401 | 1087.4656 | 1087.4570 | 7.92 | 0 | (38) | 0.0044   | 1 | K.ESQAYYDGR.R    |
|                                     | <a href="#">246</a> | 545.2651 | 1088.5156 | 1088.4999 | 14.4 | 0 | 4    | 22       | 4 | R.YPGQSPGQNR.Y   |
| <input checked="" type="checkbox"/> | <a href="#">268</a> | 570.2647 | 1138.5148 | 1138.5142 | 0.54 | 0 | (38) | 0.008    | 1 | K.GENFTETDVK.M   |
| <input checked="" type="checkbox"/> | <a href="#">269</a> | 570.2656 | 1138.5166 | 1138.5142 | 2.12 | 0 | 50   | 0.00044  | 1 | K.GENFTETDVK.M   |
| <input checked="" type="checkbox"/> | <a href="#">270</a> | 570.2673 | 1138.5200 | 1138.5142 | 5.10 | 0 | (46) | 0.0011   | 1 | K.GENFTETDVK.M   |
| <input checked="" type="checkbox"/> | <a href="#">271</a> | 570.2728 | 1138.5310 | 1138.5142 | 14.8 | 0 | (44) | 0.0022   | 1 | K.GENFTETDVK.M   |
| <input checked="" type="checkbox"/> | <a href="#">322</a> | 622.7874 | 1243.5602 | 1243.5581 | 1.70 | 1 | 16   | 1.1      | 1 | K.ESQAYYDGRR.S   |
| <input checked="" type="checkbox"/> | <a href="#">325</a> | 622.7895 | 1243.5644 | 1243.5581 | 5.08 | 1 | (11) | 3.5      | 1 | K.ESQAYYDGRR.S   |
| <input checked="" type="checkbox"/> | <a href="#">327</a> | 622.7902 | 1243.5658 | 1243.5581 | 6.20 | 1 | (4)  | 19       | 1 | K.ESQAYYDGRR.S   |
| <input checked="" type="checkbox"/> | <a href="#">328</a> | 622.7919 | 1243.5692 | 1243.5581 | 8.94 | 1 | (2)  | 34       | 2 | K.ESQAYYDGRR.S   |
| <input checked="" type="checkbox"/> | <a href="#">437</a> | 756.8663 | 1511.7180 | 1511.7112 | 4.50 | 0 | 65   | 2.1e-005 | 1 | R.VVEQMCVTQYQK.E |

14. [IPI00122928](#) Mass: 50514 Score: 143 Queries matched: 7 emPAI: 0.21

Tax\_Id=10090 Gene\_Symbol=Tubb6 Tubulin beta-6 chain

 Check to include this hit in error tolerant search or archive report

| Query               | Observed | Mr(expt)  | Mr(calc)  | ppm  | Miss | Score | Expect   | Rank | Peptide                            |
|---------------------|----------|-----------|-----------|------|------|-------|----------|------|------------------------------------|
| <a href="#">273</a> | 572.3212 | 1142.6278 | 1142.6270 | 0.72 | 0    | 42    | 0.0049   | 1    | K.LAVNMVPPFR.L                     |
| <a href="#">397</a> | 676.3429 | 1350.6712 | 1350.6676 | 2.72 | 0    | (67)  | 1.4e-005 | 1    | R.IMNTFVMPSPK.V                    |
| <a href="#">398</a> | 676.3460 | 1350.6774 | 1350.6676 | 7.31 | 0    | 79    | 1e-006   | 1    | R.IMNTFVMPSPK.V                    |
| <a href="#">532</a> | 846.4391 | 1690.8636 | 1690.8600 | 2.16 | 0    | (20)  | 0.66     | 1    | R.ALTVPELTQQMFDK.N                 |
| <a href="#">533</a> | 846.4404 | 1690.8662 | 1690.8600 | 3.69 | 0    | 40    | 0.0061   | 1    | R.ALTVPELTQQMFDK.N                 |
| <a href="#">534</a> | 848.9236 | 1695.8326 | 1695.8257 | 4.12 | 0    | 15    | 2.1      | 1    | K.NSSYFVEWIPNVK.V                  |
| <a href="#">537</a> | 854.4365 | 1706.8584 | 1706.8549 | 2.07 | 0    | (30)  | 0.064    | 2    | R.ALTVPELTQQMFDK.N + Oxidation (M) |

15. [IPI00225062](#) Mass: 285676 Score: 134 Queries matched: 4 emPAI: 0.03

Tax\_Id=10090 Gene\_Symbol=Srrm2 Isoform 3 of Serine/arginine repetitive matrix protein 2

 Check to include this hit in error tolerant search or archive report

| Query                               | Observed            | Mr(expt) | Mr(calc)  | ppm       | Miss  | Score | Expect | Rank     | Peptide |                    |
|-------------------------------------|---------------------|----------|-----------|-----------|-------|-------|--------|----------|---------|--------------------|
| <input checked="" type="checkbox"/> | <a href="#">404</a> | 691.3704 | 1380.7262 | 1380.7361 | -7.15 | 0     | 30     | 0.069    | 1       | R.TAVAPSAVNLDPR.T  |
| <input checked="" type="checkbox"/> | <a href="#">405</a> | 693.3643 | 1384.7140 | 1384.7133 | 0.57  | 0     | 64     | 3.2e-005 | 1       | R.MAPALSGANLTSFR.V |
| <input checked="" type="checkbox"/> | <a href="#">411</a> | 701.3675 | 1400.7204 | 1400.7259 | -3.92 | 0     | 62     | 5.6e-005 | 1       | R.TSAIPASVNLDSR.T  |
| <input checked="" type="checkbox"/> | <a href="#">443</a> | 759.4198 | 1516.8250 | 1516.8362 | -7.34 | 0     | 67     | 1.1e-005 | 1       | R.TPQAPTANLVVGR.S  |

## Proteins matching the same set of peptides:

[IPI00785240](#) Mass: 295356 Score: 134 Queries matched: 4  
Tax\_Id=10090 Gene\_Symbol=Srrm2 Isoform 1 of Serine/arginine repetitive matrix protein 2

[IPI00785384](#) Mass: 284043 Score: 134 Queries matched: 4  
Tax\_Id=10090 Gene\_Symbol=Srrm2 Isoform 2 of Serine/arginine repetitive matrix protein 2

[IPI00874854](#) Mass: 295521 Score: 134 Queries matched: 4  
Tax\_Id=10090 Gene\_Symbol=Srrm2 Srrm2 protein

16. [IPI00221528](#) Mass: 42319 Score: 133 Queries matched: 6 emPAI: 0.16

Tax\_Id=10090 Gene\_Symbol=Actb12 Beta-actin-like protein 2

 Check to include this hit in error tolerant search or archive report

| Query               | Observed | Mr(expt)  | Mr(calc)  | ppm    | Miss | Score | Expect   | Rank | Peptide                |
|---------------------|----------|-----------|-----------|--------|------|-------|----------|------|------------------------|
| <a href="#">550</a> | 895.9509 | 1789.8872 | 1789.8846 | 1.46   | 0    | 85    | 2e-007   | 1    | R.SYELPDGQVITIGNER.F   |
| <a href="#">551</a> | 895.9536 | 1789.8926 | 1789.8846 | 4.48   | 0    | (73)  | 3.1e-006 | 1    | R.SYELPDGQVITIGNER.F   |
| <a href="#">566</a> | 652.0146 | 1953.0220 | 1953.0571 | -17.99 | 0    | (33)  | 0.023    | 2    | R.VAPDEHPILLTEAPLNPK.I |
| <a href="#">567</a> | 652.0152 | 1953.0238 | 1953.0571 | -17.06 | 0    | 39    | 0.0057   | 2    | R.VAPDEHPILLTEAPLNPK.I |
| <a href="#">568</a> | 652.0201 | 1953.0385 | 1953.0571 | -9.54  | 0    | (27)  | 0.098    | 2    | R.VAPDEHPILLTEAPLNPK.I |
| <a href="#">569</a> | 652.0240 | 1953.0502 | 1953.0571 | -3.55  | 0    | (36)  | 0.011    | 2    | R.VAPDEHPILLTEAPLNPK.I |

17. [IPI00404590](#) Mass: 19412 Score: 102 Queries matched: 10 emPAI: 0.38

Tax\_Id=10090 Gene\_Symbol=H1f0 Putative uncharacterized protein

 Check to include this hit in error tolerant search or archive report

| Query                               | Observed            | Mr(expt) | Mr(calc)  | ppm       | Miss  | Score | Expect | Rank     | Peptide |                   |
|-------------------------------------|---------------------|----------|-----------|-----------|-------|-------|--------|----------|---------|-------------------|
| <input checked="" type="checkbox"/> | <a href="#">223</a> | 530.7672 | 1059.5198 | 1059.5196 | 0.20  | 0     | (7)    | 20       | 1       | K.VGENADSQIK.L    |
| <input checked="" type="checkbox"/> | <a href="#">225</a> | 530.7692 | 1059.5238 | 1059.5196 | 3.97  | 0     | (48)   | 0.0015   | 1       | K.VGENADSQIK.L    |
| <input checked="" type="checkbox"/> | <a href="#">226</a> | 530.7695 | 1059.5244 | 1059.5196 | 4.54  | 0     | (33)   | 0.049    | 1       | K.VGENADSQIK.L    |
| <input checked="" type="checkbox"/> | <a href="#">227</a> | 530.7698 | 1059.5250 | 1059.5196 | 5.11  | 0     | (26)   | 0.27     | 1       | K.VGENADSQIK.L    |
| <input checked="" type="checkbox"/> | <a href="#">228</a> | 530.7698 | 1059.5250 | 1059.5196 | 5.11  | 0     | (15)   | 3.6      | 1       | K.VGENADSQIK.L    |
| <input checked="" type="checkbox"/> | <a href="#">229</a> | 530.7701 | 1059.5256 | 1059.5196 | 5.67  | 0     | 62     | 6.9e-005 | 1       | K.VGENADSQIK.L    |
| <input checked="" type="checkbox"/> | <a href="#">231</a> | 530.7714 | 1059.5282 | 1059.5196 | 8.13  | 0     | (22)   | 0.72     | 1       | K.VGENADSQIK.L    |
| <input checked="" type="checkbox"/> | <a href="#">232</a> | 530.7786 | 1059.5426 | 1059.5196 | 21.7  | 0     | (19)   | 1.4      | 1       | K.VGENADSQIK.L    |
| <input checked="" type="checkbox"/> | <a href="#">354</a> | 651.3392 | 1300.6638 | 1300.6623 | 1.22  | 0     | 46     | 0.002    | 1       | M.TENSTSAAPAKPK.R |
| <input checked="" type="checkbox"/> | <a href="#">418</a> | 719.8656 | 1437.7166 | 1437.7173 | -0.48 | 0     | 30     | 0.079    | 1       | K.YSDMIVAAIQEK.N  |

## Proteins matching the same set of peptides:

[IPI00467914](#) Mass: 20848 Score: 102 Queries matched: 10  
Tax\_Id=10090 Gene\_Symbol=H1f0 Histone H1.0

18. [IPI00323357](#) Mass: 71055 Score: 79 Queries matched: 3 emPAI: 0.09

Tax\_Id=10090 Gene\_Symbol=Hspa8 Heat shock cognate 71 kDa protein

 Check to include this hit in error tolerant search or archive report

| Query                               | Observed            | Mr(expt) | Mr(calc)  | ppm       | Miss | Score | Expect | Rank   | Peptide |                   |
|-------------------------------------|---------------------|----------|-----------|-----------|------|-------|--------|--------|---------|-------------------|
| <input checked="" type="checkbox"/> | <a href="#">356</a> | 652.3232 | 1302.6318 | 1302.5914 | 31.1 | 0     | 48     | 0.0013 | 1       | K.NSLESYAFNMK.A   |
| <input checked="" type="checkbox"/> | <a href="#">490</a> | 808.9067 | 1615.7988 | 1615.7804 | 11.4 | 0     | 14     | 2.7    | 1       | K.SFYPEEVSSMLTK.M |

[529](#) 825.4030 1648.7914 1648.7879 2.15 0 64 2.6e-005 1 K.NQVAMNPTNTVFDK.R

Proteins matching the same set of peptides:

[IPI00886297](#) Mass: 68964 Score: 79 Queries matched: 3  
Tax\_Id=10090 Gene\_Symbol=Hspa8 Hspa8 protein

19. [IPI00469012](#) Mass: 87791 Score: 76 Queries matched: 3 emPAI: 0.08  
Tax\_Id=10090 Gene\_Symbol=Tbc1d10b TBC1 domain family member 10B

Check to include this hit in error tolerant search or archive report

| Query                                                   | Observed | Mr(expt)  | Mr(calc)  | ppm  | Miss Score | Expect | Rank    | Peptide                 |
|---------------------------------------------------------|----------|-----------|-----------|------|------------|--------|---------|-------------------------|
| <input checked="" type="checkbox"/> <a href="#">267</a> | 568.8079 | 1135.6012 | 1135.5986 | 2.34 | 0          | 50     | 0.00078 | 1 R.ASPVPGGTPTR.T       |
| <input checked="" type="checkbox"/> <a href="#">561</a> | 925.0280 | 1848.0414 | 1848.0356 | 3.14 | 0          | (38)   | 0.0037  | 1 R.QQPLGPFSSLLSLPSLK.S |
| <input checked="" type="checkbox"/> <a href="#">562</a> | 925.0283 | 1848.0420 | 1848.0356 | 3.46 | 0          | 47     | 0.00049 | 1 R.QQPLGPFSSLLSLPSLK.S |

20. [IPI00223714](#) Mass: 21964 Score: 68 Queries matched: 2 emPAI: 0.15  
Tax\_Id=10090 Gene\_Symbol=Hist1hle Histone H1.4

Check to include this hit in error tolerant search or archive report

| Query                                                   | Observed | Mr(expt)  | Mr(calc)  | ppm   | Miss Score | Expect | Rank     | Peptide            |
|---------------------------------------------------------|----------|-----------|-----------|-------|------------|--------|----------|--------------------|
| <input checked="" type="checkbox"/> <a href="#">314</a> | 614.8428 | 1227.6710 | 1227.6711 | -0.01 | 0          | (46)   | 0.0018   | 1 K.TSGPPVSELITK.A |
| <input checked="" type="checkbox"/> <a href="#">315</a> | 614.8445 | 1227.6744 | 1227.6711 | 2.75  | 0          | 60     | 6.8e-005 | 1 K.TSGPPVSELITK.A |

21. [IPI00656325](#) Mass: 83131 Score: 67 Queries matched: 2 emPAI: 0.08  
Tax\_Id=10090 Gene\_Symbol=Nsf Vesicle-fusing ATPase

Check to include this hit in error tolerant search or archive report

| Query                                                   | Observed | Mr(expt)  | Mr(calc)  | ppm   | Miss Score | Expect | Rank    | Peptide            |
|---------------------------------------------------------|----------|-----------|-----------|-------|------------|--------|---------|--------------------|
| <input checked="" type="checkbox"/> <a href="#">353</a> | 646.3333 | 1290.6520 | 1290.6568 | -3.68 | 0          | 40     | 0.0086  | 1 K.NFSGAELEGLVR.A |
| <input checked="" type="checkbox"/> <a href="#">425</a> | 729.3958 | 1456.7770 | 1456.7773 | -0.19 | 0          | 57     | 0.00012 | 1 R.VLDDGELLVQQT.K |

Proteins matching the same set of peptides:

[IPI00876255](#) Mass: 83174 Score: 67 Queries matched: 2  
Tax\_Id=10090 Gene\_Symbol=Nsf 83 kDa protein

22. [IPI00377681](#) Mass: 42045 Score: 62 Queries matched: 1 emPAI: 0.08  
Tax\_Id=10090 Gene\_Symbol=N28178 Isoform 2 of Protein KIAA1045

Check to include this hit in error tolerant search or archive report

| Query                                                   | Observed | Mr(expt)  | Mr(calc)  | ppm  | Miss Score | Expect | Rank     | Peptide          |
|---------------------------------------------------------|----------|-----------|-----------|------|------------|--------|----------|------------------|
| <input checked="" type="checkbox"/> <a href="#">399</a> | 680.8234 | 1359.6322 | 1359.6266 | 4.15 | 0          | 62     | 3.5e-005 | 1 R.ALTDQEQAAR.Q |

Proteins matching the same set of peptides:

[IPI00647986](#) Mass: 45936 Score: 62 Queries matched: 1  
Tax\_Id=10090 Gene\_Symbol=N28178 Isoform 1 of Protein KIAA1045  
[IPI00885599](#) Mass: 29710 Score: 62 Queries matched: 1  
Tax\_Id=10090 Gene\_Symbol=N28178 Novel protein

23. [IPI00122069](#) Mass: 79562 Score: 61 Queries matched: 1 emPAI: 0.04  
Tax\_Id=10090 Gene\_Symbol=Prkcc Protein kinase C gamma type

Check to include this hit in error tolerant search or archive report

| Query                                                   | Observed | Mr(expt)  | Mr(calc)  | ppm  | Miss Score | Expect | Rank     | Peptide            |
|---------------------------------------------------------|----------|-----------|-----------|------|------------|--------|----------|--------------------|
| <input checked="" type="checkbox"/> <a href="#">308</a> | 599.8120 | 1197.6094 | 1197.5990 | 8.75 | 0          | 61     | 5.4e-005 | 1 R.LGSGPDGEPTIR.A |

24. [IPI00136703](#) Mass: 42971 Score: 56 Queries matched: 3 emPAI: 0.08  
Tax\_Id=10090 Gene\_Symbol=Ckb Creatine kinase B-type

Check to include this hit in error tolerant search or archive report

| Query                                                   | Observed | Mr(expt)  | Mr(calc)  | ppm  | Miss Score | Expect | Rank    | Peptide               |
|---------------------------------------------------------|----------|-----------|-----------|------|------------|--------|---------|-----------------------|
| <a href="#">191</a>                                     | 516.2849 | 1030.5552 | 1030.5481 | 6.96 | 0          | 8      | 17      | 2 K.LLIEMEQR.L        |
| <input checked="" type="checkbox"/> <a href="#">363</a> | 652.3676 | 1302.7206 | 1302.7183 | 1.78 | 0          | 56     | 0.00016 | 1 K.VLTPELYAELR.A     |
| <input checked="" type="checkbox"/> <a href="#">530</a> | 828.9172 | 1655.8198 | 1655.8188 | 0.60 | 0          | 30     | 0.059   | 1 R.LEQQQAIDDLMPAQK.- |

25. [IPI00347110](#) Mass: 59502 Score: 50 Queries matched: 1 emPAI: 0.06  
Tax\_Id=10090 Gene\_Symbol=Krt73 Keratin, type II cytoskeletal 73

Check to include this hit in error tolerant search or archive report

| Query                                                   | Observed | Mr(expt)  | Mr(calc)  | ppm   | Miss Score | Expect | Rank    | Peptide            |
|---------------------------------------------------------|----------|-----------|-----------|-------|------------|--------|---------|--------------------|
| <input checked="" type="checkbox"/> <a href="#">434</a> | 738.3943 | 1474.7740 | 1474.7780 | -2.67 | 0          | 50     | 0.00071 | 1 R.FLEQQNQVLQTK.W |

Proteins matching the same set of peptides:

[IPI00420970](#) Mass: 55340 Score: 50 Queries matched: 1  
Tax\_Id=10090 Gene\_Symbol=Krt74 Keratin, type II cytoskeletal 74  
[IPI00462140](#) Mass: 61379 Score: 50 Queries matched: 1  
Tax\_Id=10090 Gene\_Symbol=Krt77 Keratin, type II cytoskeletal 1b  
[IPI00468956](#) Mass: 57860 Score: 50 Queries matched: 1  
Tax\_Id=10090 Gene\_Symbol=Krt71 Keratin, type II cytoskeletal 71  
[IPI00625729](#) Mass: 66079 Score: 50 Queries matched: 1  
Tax\_Id=10090 Gene\_Symbol=Krt1 Keratin, type II cytoskeletal 1

26. [IPI00403219](#) Score: 46 Queries matched: 1  
Tax\_Id=10090 Gene\_Symbol=Gml14496 Novel vomeronasal 2, receptor family protein  
 Check to include this hit in error tolerant search or archive report
- | Query               | Observed | Mr(expt) | Mr(calc) | ppm  | Miss | Score | Expect | Rank | Peptide      |
|---------------------|----------|----------|----------|------|------|-------|--------|------|--------------|
| <a href="#">155</a> | 487.7528 | 973.4910 | 973.4617 | 30.1 | 0    | 46    | 0.0023 | 1    | R.WEDLGAQR.I |
- 
27. [IPI00119853](#) Score: 44 Queries matched: 5  
Tax\_Id=10090 Gene\_Symbol=Gnas Isoform Gnas-1 of Guanine nucleotide-binding protein G(s) subunit alpha isoforms short  
 Check to include this hit in error tolerant search or archive report
- | Query               | Observed | Mr(expt)  | Mr(calc)  | ppm    | Miss | Score | Expect | Rank | Peptide         |
|---------------------|----------|-----------|-----------|--------|------|-------|--------|------|-----------------|
| <a href="#">203</a> | 529.3122 | 1056.6098 | 1056.6179 | -7.61  | 0    | (18)  | 0.98   | 1    | R.LLLLGAGESGK.S |
| <a href="#">204</a> | 529.3124 | 1056.6102 | 1056.6179 | -7.23  | 0    | 44    | 0.0026 | 1    | R.LLLLGAGESGK.S |
| <a href="#">238</a> | 538.2985 | 1074.5824 | 1074.6073 | -23.14 | 0    | (9)   | 11     | 8    | R.LQEALNLFK.S   |
| <a href="#">239</a> | 538.2990 | 1074.5834 | 1074.6073 | -22.21 | 0    | 21    | 0.64   | 2    | R.LQEALNLFK.S   |
| <a href="#">240</a> | 538.3007 | 1074.5868 | 1074.6073 | -19.05 | 0    | (11)  | 6.8    | 2    | R.LQEALNLFK.S   |
- Proteins matching the same set of peptides:  
[IPI00463891](#) Score: 44 Queries matched: 5  
[IPI00750570](#) Score: 44 Queries matched: 5  
[IPI00416906](#) Score: 44 Queries matched: 5  
[IPI00469793](#) Score: 44 Queries matched: 5
- 
28. [IPI00347770](#) Score: 44 Queries matched: 3  
Tax\_Id=10090 Gene\_Symbol=Gnat3 Guanine nucleotide-binding protein G(t) subunit alpha-3  
 Check to include this hit in error tolerant search or archive report
- | Query               | Observed | Mr(expt)  | Mr(calc)  | ppm   | Miss | Score | Expect | Rank | Peptide         |
|---------------------|----------|-----------|-----------|-------|------|-------|--------|------|-----------------|
| <a href="#">203</a> | 529.3122 | 1056.6098 | 1056.6179 | -7.61 | 0    | (18)  | 0.98   | 1    | K.LLLLGAGESGK.S |
| <a href="#">204</a> | 529.3124 | 1056.6102 | 1056.6179 | -7.23 | 0    | 44    | 0.0026 | 1    | K.LLLLGAGESGK.S |
| <a href="#">221</a> | 530.3175 | 1058.6204 | 1058.5873 | 31.4  | 1    | 10    | 4.6    | 4    | K.IIHKNGYSK.Q   |
- 
29. [IPI00118569](#) Mass: 44369 Score: 44 Queries matched: 4 emPAI: 0.07  
Tax\_Id=10090 Gene\_Symbol=Gna13 Guanine nucleotide-binding protein subunit alpha-13  
 Check to include this hit in error tolerant search or archive report
- | Query               | Observed | Mr(expt)  | Mr(calc)  | ppm   | Miss | Score | Expect | Rank | Peptide          |
|---------------------|----------|-----------|-----------|-------|------|-------|--------|------|------------------|
| <a href="#">203</a> | 529.3122 | 1056.6098 | 1056.6179 | -7.61 | 0    | (18)  | 0.98   | 1    | K.ILLLGAGESGK.S  |
| <a href="#">204</a> | 529.3124 | 1056.6102 | 1056.6179 | -7.23 | 0    | 44    | 0.0026 | 1    | K.ILLLGAGESGK.S  |
| <a href="#">335</a> | 631.3046 | 1260.5946 | 1260.5955 | -0.64 | 0    | 3     | 34     | 7    | R.APMAAQGMVETR.V |
| <a href="#">340</a> | 631.3057 | 1260.5968 | 1260.5955 | 1.10  | 0    | (3)   | 35     | 6    | R.APMAAQGMVETR.V |
- Proteins matching the same set of peptides:  
[IPI00649388](#) Mass: 20095 Score: 44 Queries matched: 4  
Tax\_Id=10090 Gene\_Symbol=Gna13 Putative uncharacterized protein
- 
30. [IPI00123176](#) Mass: 36804 Score: 43 Queries matched: 2 emPAI: 0.09  
Tax\_Id=10090 Gene\_Symbol=Gm6316 Glyceraldehyde-3-phosphate dehydrogenase  
 Check to include this hit in error tolerant search or archive report
- | Query                                                   | Observed | Mr(expt)  | Mr(calc)  | ppm  | Miss | Score | Expect | Rank | Peptide             |
|---------------------------------------------------------|----------|-----------|-----------|------|------|-------|--------|------|---------------------|
| <input checked="" type="checkbox"/> <a href="#">401</a> | 685.3772 | 1368.7398 | 1368.7361 | 2.74 | 0    | (26)  | 0.13   | 1    | R.GAAQNIIPASTGAAK.A |
| <input checked="" type="checkbox"/> <a href="#">402</a> | 685.3792 | 1368.7438 | 1368.7361 | 5.66 | 0    | 43    | 0.0027 | 1    | R.GAAQNIIPASTGAAK.A |
- Proteins matching the same set of peptides:  
[IPI00135284](#) Mass: 36092 Score: 43 Queries matched: 2  
Tax\_Id=10090 Gene\_Symbol=Gml6374 Glyceraldehyde-3-phosphate dehydrogenase  
[IPI00229201](#) Mass: 16676 Score: 43 Queries matched: 2  
Tax\_Id=10090 Gene\_Symbol=3000002C10Rik Putative uncharacterized protein  
[IPI00271869](#) Mass: 36293 Score: 43 Queries matched: 2  
Tax\_Id=10090 Gene\_Symbol=- 36 kDa protein  
[IPI00273646](#) Mass: 36072 Score: 43 Queries matched: 2  
Tax\_Id=10090 Gene\_Symbol=Gapdh;LOC100042025 Glyceraldehyde-3-phosphate dehydrogenase  
[IPI00622795](#) Mass: 36074 Score: 43 Queries matched: 2  
Tax\_Id=10090 Gene\_Symbol=- 36 kDa protein  
[IPI00625893](#) Mass: 36205 Score: 43 Queries matched: 2  
Tax\_Id=10090 Gene\_Symbol=Gm6981 Glyceraldehyde-3-phosphate dehydrogenase  
[IPI00752289](#) Mass: 36308 Score: 43 Queries matched: 2  
Tax\_Id=10090 Gene\_Symbol=Gml0290 Glyceraldehyde-3-phosphate dehydrogenase  
[IPI00848801](#) Mass: 36100 Score: 43 Queries matched: 2  
Tax\_Id=10090 Gene\_Symbol=- 36 kDa protein  
[IPI00849045](#) Mass: 36072 Score: 43 Queries matched: 2  
Tax\_Id=10090 Gene\_Symbol=- 36 kDa protein  
[IPI00850337](#) Mass: 44633 Score: 43 Queries matched: 2  
Tax\_Id=10090 Gene\_Symbol=LOC100048117 similar to Glyceraldehyde-3-phosphate dehydrogenase (GAPDH) isoform 1  
[IPI00850377](#) Mass: 35975 Score: 43 Queries matched: 2  
Tax\_Id=10090 Gene\_Symbol=- 36 kDa protein  
[IPI00850779](#) Mass: 36076 Score: 43 Queries matched: 2  
Tax\_Id=10090 Gene\_Symbol=- 36 kDa protein  
[IPI00874682](#) Mass: 36038 Score: 43 Queries matched: 2  
Tax\_Id=10090 Gene\_Symbol=- 36 kDa protein  
[IPI00874964](#) Mass: 36512 Score: 43 Queries matched: 2



Tax\_Id=10090 Gene\_Symbol=- 36 kDa protein

31. [IPI00348094](#) Mass: 51093 Score: 42 Queries matched: 3 emPAI: 0.06

Tax\_Id=10090 Gene\_Symbol=Tubbl Tubulin, beta 1

 Check to include this hit in error tolerant search or archive report

| Query               | Observed | Mr(expt)  | Mr(calc)  | ppm  | Miss | Score | Expect | Rank | Peptide          |
|---------------------|----------|-----------|-----------|------|------|-------|--------|------|------------------|
| <a href="#">273</a> | 572.3212 | 1142.6278 | 1142.6270 | 0.72 | 0    | 42    | 0.0049 | 1    | K.LAVNMVFFPR.L   |
| <a href="#">364</a> | 660.3562 | 1318.6978 | 1318.6955 | 1.78 | 0    | 10    | 7.7    | 2    | R.ILNSFSVMPSPK.V |
| <a href="#">365</a> | 660.3578 | 1318.7010 | 1318.6955 | 4.21 | 0    | (10)  | 7.9    | 2    | R.ILNSFSVMPSPK.V |

32. [IPI00116074](#) Mass: 86151 Score: 40 Queries matched: 1 emPAI: 0.04

Tax\_Id=10090 Gene\_Symbol=Aco2 Aconitase hydratase, mitochondrial

 Check to include this hit in error tolerant search or archive report

| Query                                                   | Observed | Mr(expt)  | Mr(calc)  | ppm   | Miss | Score | Expect | Rank | Peptide          |
|---------------------------------------------------------|----------|-----------|-----------|-------|------|-------|--------|------|------------------|
| <input checked="" type="checkbox"/> <a href="#">428</a> | 732.3771 | 1462.7396 | 1462.7416 | -1.34 | 0    | 40    | 0.009  | 1    | K.SQFTITPGEQIR.A |

33. [IPI00119063](#) Mass: 523342 Score: 37 Queries matched: 3 emPAI: 0.01

Tax\_Id=10090 Gene\_Symbol=Lrp1 Prolow-density lipoprotein receptor-related protein 1

 Check to include this hit in error tolerant search or archive report

| Query                                                   | Observed | Mr(expt)  | Mr(calc)  | ppm   | Miss | Score | Expect | Rank | Peptide          |
|---------------------------------------------------------|----------|-----------|-----------|-------|------|-------|--------|------|------------------|
| <a href="#">152</a>                                     | 484.7774 | 967.5402  | 967.4975  | 44.2  | 0    | (5)   | 15     | 5    | R.GIPLDPNDK.S    |
| <a href="#">153</a>                                     | 484.7776 | 967.5406  | 967.4975  | 44.6  | 0    | 9     | 5.4    | 3    | R.GIPLDPNDK.S    |
| <input checked="" type="checkbox"/> <a href="#">333</a> | 626.3710 | 1250.7274 | 1250.7347 | -5.78 | 0    | 37    | 0.0059 | 1    | R.GVAGAPPTVTLR.S |

Peptide matches not assigned to protein hits: (no details means no match)

| Query                                                   | Observed | Mr(expt)  | Mr(calc)  | ppm    | Miss | Score | Expect | Rank | Peptide                                |
|---------------------------------------------------------|----------|-----------|-----------|--------|------|-------|--------|------|----------------------------------------|
| <input checked="" type="checkbox"/> <a href="#">407</a> | 696.3701 | 1390.7256 | 1390.7245 | 0.82   | 0    | 30    | 0.064  | 1    | LEGVVFPYQPSR                           |
| <input checked="" type="checkbox"/> <a href="#">196</a> | 523.2819 | 1044.5492 | 1044.5564 | -6.80  | 0    | 29    | 0.12   | 1    | INDITLNSR                              |
| <input checked="" type="checkbox"/> <a href="#">154</a> | 487.3037 | 972.5928  | 972.5505  | 43.6   | 1    | 29    | 0.045  | 1    | VRDFLAPR                               |
| <input checked="" type="checkbox"/> <a href="#">195</a> | 520.2805 | 1038.5464 | 1038.5458 | 0.65   | 0    | 28    | 0.1    | 1    | AQASAPAQAPK                            |
| <input checked="" type="checkbox"/> <a href="#">309</a> | 599.8347 | 1197.6548 | 1197.6605 | -4.71  | 0    | 27    | 0.12   | 1    | ASGPPVSELITK                           |
| <input checked="" type="checkbox"/> <a href="#">368</a> | 669.3201 | 1336.6256 | 1336.6187 | 5.22   | 0    | 27    | 0.13   | 1    | YALYDATYETK                            |
| <input checked="" type="checkbox"/> <a href="#">558</a> | 912.9982 | 1823.9818 | 1823.9782 | 2.02   | 0    | 22    | 0.24   | 1    | VGINYPPTVPPGGDLAK                      |
| <input checked="" type="checkbox"/> <a href="#">25</a>  | 531.3553 | 530.3480  | 530.3428  | 9.90   | 0    | 20    | 0.74   | 1    | ILASK                                  |
| <input checked="" type="checkbox"/> <a href="#">419</a> | 720.3734 | 1438.7322 | 1438.7344 | -1.48  | 0    | 19    | 0.76   | 1    | YITPDQLADLYK                           |
| <input checked="" type="checkbox"/> <a href="#">63</a>  | 408.2385 | 814.4624  | 814.4661  | -4.48  | 1    | 19    | 1.2    | 1    | GTVAPSKR                               |
| <input checked="" type="checkbox"/> <a href="#">606</a> | 737.7026 | 2210.0860 | 2210.0307 | 25.0   | 1    | 19    | 0.66   | 1    | GLMVLQSIASRGCDTQDSEK + Oxidation (M)   |
| <input checked="" type="checkbox"/> <a href="#">78</a>  | 421.7573 | 841.5000  | 841.4810  | 22.6   | 0    | 19    | 0.75   | 1    | LGTWLPR                                |
| <input checked="" type="checkbox"/> <a href="#">32</a>  | 590.3131 | 589.3058  | 589.3006  | 8.87   | 0    | 18    | 2.1    | 1    | ANMVR                                  |
| <input checked="" type="checkbox"/> <a href="#">130</a> | 464.7809 | 927.5472  | 927.5502  | -3.15  | 1    | 18    | 0.88   | 1    | GITTVPGKR                              |
| <input checked="" type="checkbox"/> <a href="#">143</a> | 470.7710 | 939.5274  | 939.5614  | -36.11 | 1    | 18    | 0.7    | 1    | NRLPIATR                               |
| <input checked="" type="checkbox"/> <a href="#">313</a> | 614.3115 | 1226.6084 | 1226.6448 | -29.61 | 0    | 18    | 0.91   | 1    | IYYHVVITR                              |
| <input checked="" type="checkbox"/> <a href="#">194</a> | 520.2767 | 1038.5388 | 1038.5458 | -6.67  | 0    | 18    | 1.1    | 1    | AQASAPAQAPK                            |
| <input checked="" type="checkbox"/> <a href="#">496</a> | 812.9454 | 1623.8762 | 1623.8832 | -4.28  | 0    | 17    | 0.91   | 1    | TGAIVDVVPVEELLGR                       |
| <input checked="" type="checkbox"/> <a href="#">190</a> | 514.7952 | 1027.5758 | 1027.5774 | -1.55  | 1    | 17    | 1.4    | 1    | VAGSGKSPAVR                            |
| <input checked="" type="checkbox"/> <a href="#">151</a> | 481.7329 | 961.4512  | 961.4586  | -7.62  | 1    | 16    | 1.9    | 1    | RQAMPGMR + Oxidation (M)               |
| <input checked="" type="checkbox"/> <a href="#">52</a>  | 385.7109 | 769.4072  | 769.4446  | -48.56 | 1    | 15    | 1.5    | 1    | LEPKQR                                 |
| <input checked="" type="checkbox"/> <a href="#">27</a>  | 531.3663 | 530.3590  | 530.3428  | 30.6   | 0    | 15    | 0.67   | 1    | ILASK                                  |
| <input checked="" type="checkbox"/> <a href="#">26</a>  | 531.3587 | 530.3514  | 530.3428  | 16.3   | 0    | 15    | 2.6    | 1    | ILASK                                  |
| <input checked="" type="checkbox"/> <a href="#">80</a>  | 428.7653 | 855.5160  | 855.5112  | 5.61   | 1    | 15    | 1.7    | 1    | ALRMLPR                                |
| <input checked="" type="checkbox"/> <a href="#">28</a>  | 531.3701 | 530.3628  | 530.3428  | 37.8   | 0    | 14    | 0.78   | 1    | ILASK                                  |
| <input checked="" type="checkbox"/> <a href="#">84</a>  | 435.7735 | 869.5324  | 869.4971  | 40.7   | 0    | 14    | 1.5    | 1    | AVVESLPR                               |
| <input checked="" type="checkbox"/> <a href="#">221</a> | 530.3175 | 1058.6204 | 1058.6488 | -26.77 | 1    | 14    | 1.9    | 1    | KFLILNPSK                              |
| <input checked="" type="checkbox"/> <a href="#">72</a>  | 415.1994 | 828.3842  | 828.4202  | -43.39 | 1    | 14    | 1.7    | 1    | ARGESPR                                |
| <input checked="" type="checkbox"/> <a href="#">246</a> | 545.2651 | 1088.5156 | 1088.5098 | 5.38   | 0    | 13    | 3.4    | 1    | EESADVNLGR                             |
| <input checked="" type="checkbox"/> <a href="#">205</a> | 530.2988 | 1058.5830 | 1058.5906 | -7.15  | 1    | 13    | 4.6    | 1    | MPTLKANIR + Oxidation (M)              |
| <input checked="" type="checkbox"/> <a href="#">104</a> | 450.7215 | 899.4284  | 899.4097  | 20.8   | 0    | 13    | 2.7    | 1    | STEPHSR                                |
| <input checked="" type="checkbox"/> <a href="#">253</a> | 556.8272 | 1111.6398 | 1111.5985 | 37.2   | 1    | 13    | 2.2    | 1    | QQPKEALGNK                             |
| <input checked="" type="checkbox"/> <a href="#">76</a>  | 415.2051 | 828.3956  | 828.3838  | 14.3   | 1    | 12    | 2.6    | 1    | NRDPDGR                                |
| <input checked="" type="checkbox"/> <a href="#">612</a> | 756.0484 | 2265.1234 | 2265.0770 | 20.5   | 0    | 12    | 3.1    | 1    | MTPAGTSLPTSWLICTSPSSR + Oxidation (M)  |
| <input checked="" type="checkbox"/> <a href="#">640</a> | 779.7223 | 2336.1451 | 2336.1617 | -7.10  | 1    | 12    | 3      | 1    | HMAAPLIGQLTRHEIEMTEK + 2 Oxidation (M) |
| <input checked="" type="checkbox"/> <a href="#">255</a> | 556.8319 | 1111.6492 | 1111.5986 | 45.6   | 0    | 12    | 2.3    | 1    | IQENVVVGTR                             |
| <input checked="" type="checkbox"/> <a href="#">73</a>  | 415.2014 | 828.3882  | 828.4276  | -47.50 | 0    | 12    | 2.6    | 1    | IHGSMRLR + Oxidation (M)               |
| <input checked="" type="checkbox"/> <a href="#">348</a> | 643.3405 | 1284.6664 | 1284.6561 | 8.02   | 0    | 12    | 4.8    | 1    | LLVVDPELTER                            |
| <input checked="" type="checkbox"/> <a href="#">115</a> | 450.7243 | 899.4340  | 899.4726  | -42.84 | 1    | 12    | 3.5    | 1    | DGFHRLR                                |
| <input checked="" type="checkbox"/> <a href="#">150</a> | 481.7226 | 961.4306  | 961.4730  | -44.01 | 1    | 11    | 3.5    | 1    | QDPGARYR                               |
| <input checked="" type="checkbox"/> <a href="#">189</a> | 514.7838 | 1027.5530 | 1027.5927 | -38.57 | 1    | 11    | 5.6    | 1    | RLWPTLSR                               |
| <input checked="" type="checkbox"/> <a href="#">92</a>  | 450.7179 | 899.4212  | 899.4461  | -27.62 | 0    | 11    | 3.3    | 1    | GLTADFGNR                              |
| <input checked="" type="checkbox"/> <a href="#">86</a>  | 435.7745 | 869.5344  | 869.5123  | 25.5   | 0    | 11    | 3.1    | 1    | VSLWLPR                                |
| <input checked="" type="checkbox"/> <a href="#">173</a> | 506.2323 | 1010.4500 | 1010.4703 | -20.02 | 0    | 11    | 3.2    | 1    | GDTTTMLR + Oxidation (M)               |
| <input checked="" type="checkbox"/> <a href="#">90</a>  | 450.7172 | 899.4198  | 899.4647  | -49.87 | 0    | 11    | 3.5    | 1    | SLQHMRLR + Oxidation (M)               |
| <input checked="" type="checkbox"/> <a href="#">177</a> | 506.2389 | 1010.4632 | 1010.4855 | -22.01 | 0    | 11    | 4      | 1    | NLMADYLR + Oxidation (M)               |
| <input checked="" type="checkbox"/> <a href="#">141</a> | 470.7696 | 939.5246  | 939.5614  | -39.09 | 1    | 11    | 3.9    | 1    | NRLPIATR                               |
| <input checked="" type="checkbox"/> <a href="#">66</a>  | 412.7505 | 823.4864  | 823.4817  | 5.80   | 0    | 11    | 2.2    | 1    | RPWLPR                                 |
| <input checked="" type="checkbox"/> <a href="#">594</a> | 737.3668 | 2209.0786 | 2209.1491 | -31.92 | 1    | 11    | 4.3    | 1    | LGEHNIKVLGNEQFVNAAK                    |
| <input checked="" type="checkbox"/> <a href="#">230</a> | 530.7705 | 1059.5264 | 1059.5495 | -21.74 | 0    | 11    | 8.8    | 1    | QALSNMLQR                              |
| <input checked="" type="checkbox"/> <a href="#">61</a>  | 407.2281 | 812.4416  | 812.4756  | -41.75 | 1    | 10    | 5.1    | 1    | AGPKALEK                               |

|     |          |           |           |        |   |    |     |   |                                            |
|-----|----------|-----------|-----------|--------|---|----|-----|---|--------------------------------------------|
| 79  | 428.7645 | 855.5144  | 855.4814  | 38.6   | 0 | 10 | 4.5 | 1 | LGAETLPR                                   |
| 140 | 470.7692 | 939.5238  | 939.5137  | 10.8   | 0 | 10 | 4.6 | 1 | NPEALAAVR                                  |
| 101 | 450.7208 | 899.4270  | 899.4322  | -5.68  | 1 | 10 | 4.3 | 1 | NRSSGSHR                                   |
| 100 | 450.7206 | 899.4266  | 899.4647  | -42.31 | 0 | 10 | 4.5 | 1 | SLQHMLR + Oxidation (M)                    |
| 385 | 670.8940 | 1339.7734 | 1339.7506 | 17.0   | 1 | 10 | 3.5 | 1 | AERPILGAMARR                               |
| 142 | 470.7698 | 939.5250  | 939.5515  | -28.14 | 1 | 10 | 4.5 | 1 | LRPGWRR                                    |
| 295 | 595.3065 | 1188.5984 | 1188.6033 | -4.10  | 1 | 10 | 7.9 | 1 | QMQRSLSPR + Oxidation (M)                  |
| 70  | 414.2204 | 826.4262  | 826.4661  | -48.20 | 0 | 10 | 5.4 | 1 | VAAPNLSR                                   |
| 107 | 450.7224 | 899.4302  | 899.4647  | -38.31 | 0 | 10 | 4.9 | 1 | SLQHMLR + Oxidation (M)                    |
| 75  | 415.2028 | 828.3910  | 828.4276  | -44.12 | 0 | 10 | 4   | 1 | IHGSMRLR + Oxidation (M)                   |
| 191 | 516.2849 | 1030.5552 | 1030.5923 | -36.00 | 0 | 10 | 11  | 1 | LLIFQNR                                    |
| 91  | 450.7173 | 899.4200  | 899.4322  | -13.47 | 1 | 10 | 4.3 | 1 | NRSSGSHR                                   |
| 176 | 506.2365 | 1010.4584 | 1010.4314 | 26.8   | 0 | 10 | 4.7 | 1 | ACMDYPVR                                   |
| 171 | 506.2305 | 1010.4464 | 1010.4781 | -31.33 | 0 | 10 | 4.2 | 1 | DLLHNEDR                                   |
| 56  | 810.4305 | 809.4232  | 809.4139  | 11.5   | 1 | 10 | 6.3 | 1 | KMQMLK + 2 Oxidation (M)                   |
| 19  | 503.2858 | 502.2785  | 502.2863  | -15.54 | 0 | 9  | 24  | 1 | AGSIR                                      |
| 85  | 435.7742 | 869.5338  | 869.5123  | 24.8   | 0 | 9  | 4.6 | 1 | VSLWLPR                                    |
| 102 | 450.7211 | 899.4276  | 899.4322  | -5.02  | 1 | 9  | 5.8 | 1 | NRSSGSHR                                   |
| 89  | 450.7172 | 899.4198  | 899.4209  | -1.22  | 0 | 9  | 5   | 1 | TQQGSSHR                                   |
| 693 | 961.4171 | 2881.2295 | 2881.2557 | -9.10  | 1 | 9  | 2.2 | 1 | AVSAFQSMGGSMFQCSWQHRFMAK + Oxidation (M)   |
| 98  | 450.7204 | 899.4262  | 899.4324  | -6.79  | 0 | 9  | 5.4 | 1 | FMFNGLR + Oxidation (M)                    |
| 103 | 450.7213 | 899.4280  | 899.4322  | -4.57  | 1 | 9  | 6   | 1 | NRSSGSHR                                   |
| 283 | 578.8117 | 1155.6088 | 1155.6108 | -1.72  | 1 | 9  | 9.3 | 1 | QQQEQALRR                                  |
| 164 | 499.2584 | 996.5022  | 996.5062  | -3.99  | 0 | 9  | 9.1 | 1 | KPMSSYLK + Oxidation (M)                   |
| 35  | 616.3713 | 615.3640  | 615.3592  | 7.90   | 0 | 9  | 25  | 1 | ALSTPK                                     |
| 67  | 412.7511 | 823.4876  | 823.4817  | 7.25   | 0 | 9  | 3.7 | 1 | RPWLPR                                     |
| 603 | 737.7007 | 2210.0803 | 2210.1843 | -47.07 | 0 | 9  | 6.9 | 1 | CGATSLMASTVLLLLLFSWK                       |
| 477 | 795.3494 | 1588.6842 | 1588.6787 | 3.47   | 0 | 9  | 3.9 | 1 | NNQDNTTNTDMPPK                             |
| 36  | 628.3656 | 627.3583  | 627.3704  | -19.24 | 1 | 9  | 7.5 | 1 | EKVPR                                      |
| 621 | 762.0510 | 2283.1312 | 2283.1706 | -17.28 | 1 | 8  | 6.8 | 1 | ATSPSNNVDEVPQIPISLSKR                      |
| 349 | 643.3462 | 1284.6778 | 1284.6357 | 32.8   | 1 | 8  | 10  | 1 | GRAGVCDPALNR                               |
| 641 | 783.7235 | 2348.1487 | 2348.1471 | 0.68   | 1 | 8  | 7.1 | 1 | SFLIWNNEEDHTRVISMEK + Oxidation (M)        |
| 112 | 450.7238 | 899.4330  | 899.4647  | -35.20 | 0 | 8  | 7.5 | 1 | SLQHMLR + Oxidation (M)                    |
| 346 | 636.8115 | 1271.6084 | 1271.6357 | -21.44 | 0 | 8  | 8.3 | 1 | LLDAESEDPRK                                |
| 108 | 450.7229 | 899.4312  | 899.4647  | -37.20 | 0 | 8  | 7.8 | 1 | SLQHMLR + Oxidation (M)                    |
| 111 | 450.7234 | 899.4322  | 899.4647  | -36.09 | 0 | 8  | 7.8 | 1 | SLQHMLR + Oxidation (M)                    |
| 403 | 458.9094 | 1373.7064 | 1373.7159 | -6.94  | 0 | 8  | 13  | 1 | KPALTMEVVCAR                               |
| 97  | 450.7202 | 899.4258  | 899.4097  | 17.9   | 0 | 8  | 6.9 | 1 | HVGGDTR                                    |
| 220 | 530.3162 | 1058.6178 | 1058.5972 | 19.5   | 0 | 8  | 8.1 | 1 | VTASLLGSPSK                                |
| 88  | 443.2438 | 884.4730  | 884.5080  | -39.48 | 1 | 8  | 9.3 | 1 | SPPKTTVR                                   |
| 148 | 477.2345 | 952.4544  | 952.4284  | 27.4   | 1 | 8  | 11  | 1 | KSSEAMR + Oxidation (M)                    |
| 658 | 888.7558 | 2663.2456 | 2663.2034 | 15.8   | 1 | 8  | 6.9 | 1 | SGYFELPSTQDCARSNHQDPLGCK                   |
| 237 | 538.2737 | 1074.5328 | 1074.5054 | 25.6   | 1 | 8  | 16  | 1 | NSKEPGNSNR                                 |
| 74  | 415.2025 | 828.3904  | 828.4051  | -17.71 | 0 | 8  | 6.9 | 1 | YATIMSK + Oxidation (M)                    |
| 625 | 762.0553 | 2283.1441 | 2283.1894 | -19.87 | 0 | 7  | 8.3 | 1 | EEVIDFSKPFMSLGISIMIK                       |
| 691 | 933.7790 | 2798.3152 | 2798.3262 | -3.94  | 1 | 7  | 6.5 | 1 | NLGNPPNAVLCSQGRDPETMVQVR + Oxidation (M)   |
| 99  | 450.7206 | 899.4266  | 899.4647  | -42.31 | 0 | 7  | 9   | 1 | HITNLMR + Oxidation (M)                    |
| 121 | 452.7405 | 903.4664  | 903.4774  | -12.11 | 0 | 7  | 19  | 1 | LGSSQVSR                                   |
| 259 | 557.7951 | 1113.5756 | 1113.5891 | -12.05 | 1 | 7  | 16  | 1 | SSPLRPGTSTR                                |
| 224 | 530.7690 | 1059.5234 | 1059.5210 | 2.33   | 0 | 7  | 20  | 1 | QEGHLPISR                                  |
| 247 | 545.2892 | 1088.5638 | 1088.5760 | -11.18 | 1 | 7  | 18  | 1 | RANNINMLK + Oxidation (M)                  |
| 93  | 450.7189 | 899.4232  | 899.4573  | -37.87 | 1 | 7  | 8.4 | 1 | QSQPRR                                     |
| 294 | 595.3062 | 1188.5978 | 1188.6172 | -16.31 | 0 | 7  | 16  | 1 | MLISAASDIR + Oxidation (M)                 |
| 60  | 406.2201 | 810.4256  | 810.4235  | 2.60   | 1 | 7  | 12  | 1 | AQYSSKK                                    |
| 392 | 672.3433 | 1342.6720 | 1342.6364 | 26.5   | 1 | 7  | 15  | 1 | ADAEBAATRIPA                               |
| 655 | 888.7497 | 2663.2273 | 2663.1670 | 22.6   | 0 | 7  | 7.6 | 1 | NLTITIGWNEDHNIIEQCQSGR                     |
| 135 | 470.7658 | 939.5170  | 939.5614  | -47.17 | 1 | 7  | 11  | 1 | LPRASGALR                                  |
| 257 | 557.3074 | 1112.6002 | 1112.6342 | -30.54 | 0 | 7  | 14  | 1 | GLFLSNVVK                                  |
| 265 | 565.3054 | 1128.5962 | 1128.6139 | -15.61 | 0 | 7  | 17  | 1 | TLIEQIEQR                                  |
| 412 | 701.8926 | 1401.7706 | 1401.7715 | -0.61  | 0 | 7  | 12  | 1 | ATQPSLTELTLK                               |
| 692 | 961.4110 | 2881.2112 | 2881.1807 | 10.6   | 1 | 7  | 3   | 1 | NFSPDQSPFAREADEECYSTQMK + Oxidation (M)    |
| 522 | 816.8976 | 1631.7806 | 1631.7912 | -6.46  | 1 | 7  | 13  | 1 | MVNRENKPPCYPK                              |
| 266 | 565.3197 | 1128.6248 | 1128.6503 | -22.51 | 0 | 7  | 16  | 1 | TKPVLSSLER                                 |
| 620 | 762.0505 | 2283.1297 | 2283.1190 | 4.67   | 1 | 7  | 10  | 1 | KGTTNATATSTSTASTAVADAQK                    |
| 622 | 762.0521 | 2283.1345 | 2283.1756 | -17.99 | 1 | 7  | 10  | 1 | GLVKVLFATETFAMGVNMPAR + 2 Oxidation (M)    |
| 166 | 500.2500 | 998.4854  | 998.5145  | -29.08 | 1 | 6  | 14  | 1 | KAEGAPNQGK                                 |
| 68  | 412.7528 | 823.4910  | 823.4817  | 11.4   | 0 | 6  | 6.5 | 1 | RPWLPR                                     |
| 331 | 622.7954 | 1243.5762 | 1243.5721 | 3.37   | 0 | 6  | 13  | 1 | GELYDYISER                                 |
| 685 | 933.4488 | 2797.3246 | 2797.3051 | 6.96   | 0 | 6  | 8.7 | 1 | MATQNVPPPPYQDSPQMTATAQPPSK + Oxidation (M) |
| 415 | 702.3759 | 1402.7372 | 1402.7061 | 22.2   | 0 | 6  | 16  | 1 | MAGVGVPLQGMVR + 2 Oxidation (M)            |
| 179 | 506.2391 | 1010.4636 | 1010.4314 | 31.9   | 0 | 6  | 11  | 1 | ACMDYPVR                                   |
| 110 | 450.7234 | 899.4322  | 899.4097  | 25.1   | 0 | 6  | 12  | 1 | STEPSHR                                    |
| 114 | 450.7242 | 899.4338  | 899.4461  | -13.61 | 0 | 6  | 12  | 1 | QSSAPPTR                                   |
| 542 | 885.9581 | 1769.9016 | 1769.8505 | 28.9   | 1 | 6  | 15  | 1 | EEPKEEESLSMPLPR                            |
| 217 | 530.3068 | 1058.5990 | 1058.5608 | 36.2   | 1 | 6  | 17  | 1 | KSTESVPPSK                                 |
| 607 | 737.7040 | 2210.0902 | 2210.0967 | -2.97  | 0 | 6  | 13  | 1 | LGEHNINVLGNEQFIDAAK                        |
| 157 | 491.2421 | 980.4696  | 980.4233  | 47.3   | 0 | 6  | 19  | 1 | AVSMDNSNK + Oxidation (M)                  |
| 71  | 415.1973 | 828.3800  | 828.4202  | -48.46 | 1 | 6  | 9.4 | 1 | REQSPGR                                    |
| 144 | 470.7715 | 939.5284  | 939.5025  | 27.6   | 0 | 6  | 12  | 1 | NPIVPTDGK                                  |
| 105 | 450.7220 | 899.4294  | 899.4726  | -47.95 | 0 | 6  | 13  | 1 | HRPSFTR                                    |
| 626 | 762.0572 | 2283.1498 | 2283.2370 | -38.22 | 1 | 6  | 12  | 1 | LMVMEIRNAYAVLYDIILK + Oxidation (M)        |

|     |          |           |           |        |   |   |     |   |                                            |
|-----|----------|-----------|-----------|--------|---|---|-----|---|--------------------------------------------|
| 133 | 470.2356 | 938.4566  | 938.4471  | 10.2   | 0 | 6 | 17  | 1 | QAYHHQR                                    |
| 369 | 670.3066 | 1338.5986 | 1338.6099 | -8.39  | 0 | 6 | 12  | 1 | NEGQPQGLMHGR + Oxidation (M)               |
| 222 | 530.7654 | 1059.5162 | 1059.5574 | -38.81 | 1 | 6 | 26  | 1 | AGSGLRWTGR                                 |
| 302 | 595.3110 | 1188.6074 | 1188.5921 | 12.9   | 1 | 6 | 23  | 1 | MADAASVVGKR + Oxidation (M)                |
| 180 | 506.2392 | 1010.4638 | 1010.5033 | -39.01 | 0 | 6 | 13  | 1 | SSPVPNPNS                                  |
| 260 | 557.8024 | 1113.5902 | 1113.5414 | 43.8   | 0 | 6 | 22  | 1 | DTNLNDLQGR                                 |
| 136 | 470.7668 | 939.5190  | 939.5614  | -45.05 | 1 | 6 | 15  | 1 | NRLPIATR                                   |
| 169 | 501.2503 | 1000.4860 | 1000.5302 | -44.08 | 1 | 6 | 20  | 1 | RLLVDDDR                                   |
| 145 | 470.7721 | 939.5296  | 939.5515  | -23.24 | 1 | 5 | 13  | 1 | LRPGWRR                                    |
| 138 | 470.7690 | 939.5234  | 939.4774  | 49.0   | 1 | 5 | 15  | 1 | QAPKEPDR                                   |
| 182 | 506.2429 | 1010.4712 | 1010.5033 | -31.68 | 0 | 5 | 15  | 1 | SSPVPNPNS                                  |
| 248 | 545.2919 | 1088.5692 | 1088.5536 | 14.4   | 0 | 5 | 27  | 1 | MGLEELLR                                   |
| 424 | 728.8551 | 1455.6956 | 1455.6664 | 20.1   | 0 | 5 | 17  | 1 | AGAQQDPDVPECLK                             |
| 279 | 573.7990 | 1145.5834 | 1145.5975 | -12.28 | 1 | 5 | 26  | 1 | AGDRVMVLRN + Oxidation (M)                 |
| 321 | 622.7869 | 1243.5592 | 1243.5946 | -28.39 | 0 | 5 | 13  | 1 | SPTGASDHFLGR                               |
| 219 | 530.3109 | 1058.6072 | 1058.5720 | 33.3   | 0 | 5 | 17  | 1 | GSTLQDAVLR                                 |
| 442 | 506.2327 | 1515.6763 | 1515.7053 | -19.14 | 0 | 5 | 12  | 1 | LDTPATSDPLSEDR                             |
| 310 | 600.2780 | 1198.5414 | 1198.5942 | -44.03 | 0 | 5 | 12  | 1 | GQPDVTQDALR                                |
| 688 | 933.7679 | 2798.2819 | 2798.2851 | -1.15  | 1 | 5 | 9.9 | 1 | APNTMWSILSSLSSEVPSDDRTMR + 2 Oxidation (M) |
| 316 | 615.2961 | 1228.5776 | 1228.6386 | -49.63 | 1 | 5 | 17  | 1 | AIYLSGYRMR                                 |
| 160 | 496.2260 | 990.4374  | 990.4487  | -11.39 | 1 | 5 | 14  | 1 | ASMSRHMR + Oxidation (M)                   |
| 162 | 496.2284 | 990.4422  | 990.4487  | -6.54  | 1 | 5 | 16  | 1 | ASMSRHMR + Oxidation (M)                   |
| 147 | 470.7730 | 939.5314  | 939.5250  | 6.87   | 1 | 5 | 14  | 1 | IQTKASHR                                   |
| 576 | 688.3119 | 2061.9139 | 2061.9426 | -13.92 | 1 | 5 | 11  | 1 | SKGSQGTSPFFMSPSPDSR + Oxidation (M)        |
| 417 | 711.3622 | 1420.7098 | 1420.6947 | 10.7   | 0 | 5 | 22  | 1 | AGDPGLQGPAGAPGEK                           |
| 168 | 500.2616 | 998.5086  | 998.4716  | 37.1   | 0 | 5 | 23  | 1 | HMEARPSR + Oxidation (M)                   |
| 600 | 737.6983 | 2210.0731 | 2210.0637 | 4.23   | 1 | 5 | 16  | 1 | LAVTSYNDIQDLMDSGNKAR                       |
| 131 | 465.2120 | 928.4094  | 928.4147  | -5.61  | 0 | 5 | 9   | 1 | FMTEVVR + Oxidation (M)                    |
| 134 | 470.7655 | 939.5164  | 939.5515  | -37.29 | 1 | 5 | 19  | 1 | LRPGWRR                                    |
| 139 | 470.7692 | 939.5238  | 939.5515  | -29.41 | 1 | 5 | 17  | 1 | LRPGWRR                                    |
| 345 | 634.3837 | 1266.7528 | 1266.7296 | 18.4   | 0 | 5 | 6.7 | 1 | KPKPTNQVEVK                                |
| 161 | 496.2276 | 990.4406  | 990.4479  | -7.28  | 1 | 5 | 16  | 1 | DQESRSNR                                   |
| 605 | 737.7022 | 2210.0848 | 2210.1167 | -14.45 | 1 | 4 | 18  | 1 | ALFASQEMWLSHRQTHLR                         |
| 420 | 728.3528 | 1454.6910 | 1454.6572 | 23.3   | 1 | 4 | 22  | 1 | QEMPQDPRAPDR + Oxidation (M)               |
| 234 | 532.2764 | 1062.5382 | 1062.5393 | -0.95  | 1 | 4 | 33  | 1 | MRSRAWAGR + Oxidation (M)                  |
| 53  | 399.7266 | 797.4386  | 797.4548  | -20.24 | 0 | 4 | 19  | 1 | LPWLRN                                     |
| 326 | 622.7897 | 1243.5648 | 1243.5615 | 2.66   | 0 | 4 | 18  | 1 | ETMPVHSQSGR + Oxidation (M)                |
| 423 | 728.8538 | 1455.6930 | 1455.6664 | 18.3   | 0 | 4 | 22  | 1 | AGAQQDPDVPECLK                             |
| 305 | 595.3142 | 1188.6138 | 1188.6033 | 8.85   | 1 | 4 | 33  | 1 | SSGVGNCKKPR                                |
| 94  | 450.7191 | 899.4236  | 899.4647  | -45.65 | 0 | 4 | 17  | 1 | SLQHMLR + Oxidation (M)                    |
| 632 | 779.7067 | 2336.0983 | 2336.0559 | 18.1   | 0 | 4 | 17  | 1 | DQSQAADMLCVVNNMEQLR + Oxidation (M)        |
| 159 | 492.2374 | 982.4602  | 982.4508  | 9.58   | 0 | 4 | 22  | 1 | NTEGYPFR                                   |
| 656 | 888.7521 | 2663.2345 | 2663.1412 | 35.0   | 1 | 4 | 17  | 1 | EFAPSDEELDSYRHGEWDPQK                      |
| 521 | 816.8972 | 1631.7798 | 1631.8017 | -13.42 | 1 | 4 | 28  | 1 | MLFLESNNWFKK + Oxidation (M)               |
| 163 | 496.2305 | 990.4464  | 990.4671  | -20.90 | 0 | 4 | 24  | 1 | YNPASFHR                                   |
| 677 | 888.7624 | 2663.2654 | 2663.2796 | -5.33  | 1 | 4 | 19  | 1 | VSSEVQQMVALTEMIRASHTSTR + Oxidation (M)    |
| 312 | 612.3268 | 1222.6390 | 1222.5942 | 36.7   | 0 | 4 | 33  | 1 | SQLQENTFTR                                 |
| 328 | 622.7919 | 1243.5692 | 1243.6091 | -32.08 | 1 | 4 | 23  | 1 | ELPRCAATGGGR                               |
| 535 | 852.4255 | 1702.8364 | 1702.7688 | 39.7   | 1 | 3 | 29  | 1 | SMSMSVGERVTLSCCK + 2 Oxidation (M)         |
| 624 | 762.0549 | 2283.1429 | 2283.1190 | 10.4   | 1 | 3 | 22  | 1 | KGTTTNATATSTSTAVADAQK                      |
| 109 | 450.7229 | 899.4312  | 899.4712  | -44.44 | 0 | 3 | 25  | 1 | DLSPIAER                                   |
| 416 | 711.3582 | 1420.7018 | 1420.6947 | 5.06   | 0 | 3 | 34  | 1 | AGDPGLQGPAGAPGEK                           |
| 514 | 816.8953 | 1631.7760 | 1631.7638 | 7.50   | 1 | 3 | 32  | 1 | TENLDDEKLNNAK                              |
| 181 | 506.2395 | 1010.4644 | 1010.4703 | -5.77  | 0 | 3 | 26  | 1 | GDTTMTMLR + Oxidation (M)                  |
| 395 | 672.8402 | 1343.6658 | 1343.6681 | -1.66  | 1 | 3 | 34  | 1 | AQGDEQEAQLKK                               |
| 116 | 450.7244 | 899.4342  | 899.4461  | -13.18 | 0 | 3 | 26  | 1 | GTPGQGLR                                   |
| 393 | 672.3479 | 1342.6812 | 1342.6551 | 19.5   | 0 | 3 | 40  | 1 | MDVQATTPLDPR                               |
| 47  | 732.3589 | 731.3516  | 731.3562  | -6.26  | 0 | 3 | 50  | 1 | DVSAANR                                    |
| 433 | 736.3515 | 1470.6884 | 1470.7566 | -46.32 | 0 | 3 | 27  | 1 | LGSTPISGASIDPEK                            |
| 617 | 761.7278 | 2282.1616 | 2282.0559 | 46.3   | 0 | 3 | 25  | 1 | VALLEQQMOMACTLDFENEK + Oxidation (M)       |
| 262 | 561.2590 | 1120.5034 | 1120.4958 | 6.84   | 0 | 3 | 32  | 1 | MEDEIQDII + Oxidation (M)                  |
| 391 | 672.3428 | 1342.6710 | 1342.6551 | 11.9   | 0 | 3 | 41  | 1 | MDVQATTPLDPR                               |
| 575 | 514.0181 | 2052.0433 | 2052.0211 | 10.8   | 0 | 3 | 27  | 1 | NEMVAHIHELLVFGGSR + Oxidation (M)          |
| 552 | 897.9138 | 1793.8130 | 1793.8665 | -29.80 | 0 | 3 | 27  | 1 | VLCEALQHPGCNIQR                            |
| 527 | 816.9020 | 1631.7894 | 1631.7905 | -0.65  | 0 | 2 | 38  | 1 | YECIFTLYPEGIK                              |
| 306 | 595.3143 | 1188.6140 | 1188.6285 | -12.14 | 1 | 2 | 47  | 1 | KPATDGMVAVRK + Oxidation (M)               |
| 137 | 470.7682 | 939.5218  | 939.4886  | 35.4   | 1 | 2 | 30  | 1 | TKHAGSPPR                                  |
| 263 | 561.2593 | 1120.5040 | 1120.5295 | -22.71 | 0 | 2 | 34  | 1 | MSLQQQSAR + Oxidation (M)                  |
| 604 | 737.7008 | 2210.0806 | 2210.1405 | -27.12 | 1 | 2 | 30  | 1 | ALSMRLNVTTEQPYFIEAK                        |
| 422 | 728.3561 | 1454.6976 | 1454.7188 | -14.51 | 1 | 2 | 37  | 1 | KRPDEVDPAGPMK + Oxidation (M)              |
| 106 | 450.7221 | 899.4296  | 899.4322  | -2.79  | 1 | 2 | 29  | 1 | NRSSGSHR                                   |
| 577 | 688.3141 | 2061.9205 | 2061.9426 | -10.72 | 1 | 2 | 22  | 1 | SKGSQGTSPFFMSPSPDSR + Oxidation (M)        |
| 235 | 536.7872 | 1071.5598 | 1071.5747 | -13.84 | 1 | 2 | 72  | 1 | KLVGATTVMH + Oxidation (M)                 |
| 615 | 761.7188 | 2282.1346 | 2282.1623 | -12.17 | 0 | 2 | 30  | 1 | FPLDYYSIPFPTTTLTGR                         |
| 394 | 672.8397 | 1343.6648 | 1343.6470 | 13.3   | 1 | 2 | 42  | 1 | KTASYSPSGQR                                |
| 167 | 500.2557 | 998.4968  | 998.4743  | 22.6   | 0 | 2 | 41  | 1 | DSMFGISVK + Oxidation (M)                  |
| 546 | 894.4644 | 1786.9142 | 1786.8849 | 16.4   | 0 | 2 | 42  | 1 | TVSWLNEQLELGNR                             |
| 559 | 912.9985 | 1823.9824 | 1823.9782 | 2.35   | 0 | 2 | 27  | 1 | VGINYQPPTVPPGGDLAK                         |
| 519 | 816.8969 | 1631.7792 | 1631.7937 | -8.86  | 1 | 2 | 42  | 1 | TEDGEGRAMITPALR + Oxidation (M)            |
| 627 | 762.0612 | 2283.1618 | 2283.1958 | -14.88 | 0 | 2 | 29  | 1 | AVEILADIQNSTLGEAEIER                       |
| 317 | 615.2972 | 1228.5798 | 1228.6387 | -47.88 | 1 | 2 | 40  | 1 | AVRFSFTVMR + Oxidation (M)                 |

|                                     |                     |          |           |           |        |   |   |    |   |                                     |
|-------------------------------------|---------------------|----------|-----------|-----------|--------|---|---|----|---|-------------------------------------|
| <input checked="" type="checkbox"/> | <a href="#">545</a> | 596.3310 | 1785.9712 | 1785.9335 | 21.1   | 1 | 1 | 35 | 1 | KFMTLDPVSDALPPK                     |
| <input checked="" type="checkbox"/> | <a href="#">554</a> | 904.9239 | 1807.8332 | 1807.7836 | 27.5   | 0 | 1 | 44 | 1 | FGSWMTDPLAPEGDNR + Oxidation (M)    |
| <input checked="" type="checkbox"/> | <a href="#">324</a> | 622.7889 | 1243.5632 | 1243.6157 | -42.15 | 1 | 1 | 34 | 1 | KGPGAASALDDSR                       |
| <input checked="" type="checkbox"/> | <a href="#">218</a> | 530.3070 | 1058.5994 | 1058.5794 | 18.9   | 0 | 1 | 51 | 1 | IMSIPDVIR + Oxidation (M)           |
| <input checked="" type="checkbox"/> | <a href="#">193</a> | 520.2688 | 1038.5230 | 1038.5458 | -21.88 | 0 | 1 | 50 | 1 | AQASAPAQAPK                         |
| <input checked="" type="checkbox"/> | <a href="#">347</a> | 638.7794 | 1275.5442 | 1275.5666 | -17.53 | 1 | 1 | 19 | 1 | KMYSHPQQON + Oxidation (M)          |
| <input checked="" type="checkbox"/> | <a href="#">698</a> | 972.0858 | 2913.2356 | 2913.3199 | -28.95 | 1 | 1 | 11 | 1 | NAFERGEDPLAGDQNDHMDSIAGVLK          |
| <input checked="" type="checkbox"/> | <a href="#">614</a> | 761.7159 | 2282.1259 | 2282.0559 | 30.7   | 0 | 1 | 38 | 1 | VALLEQQMQACTLDFENEK + Oxidation (M) |
| <input checked="" type="checkbox"/> | <a href="#">252</a> | 556.8272 | 1111.6398 | 1111.6349 | 4.41   | 1 | 1 | 31 | 1 | KSPPTVLSR                           |
| <input checked="" type="checkbox"/> | <a href="#">610</a> | 737.7059 | 2210.0959 | 2210.0967 | -0.39  | 0 | 1 | 40 | 1 | LGEHNVLEGNEQFIDAAK                  |
| <input checked="" type="checkbox"/> | <a href="#">304</a> | 595.3141 | 1188.6136 | 1188.6714 | -48.56 | 1 | 1 | 66 | 1 | NETGLLSSIKK                         |
| <input checked="" type="checkbox"/> | <a href="#">491</a> | 809.4144 | 1616.8142 | 1616.7947 | 12.1   | 1 | 1 | 54 | 1 | WESLHQEFSAKQK                       |
| <input checked="" type="checkbox"/> | <a href="#">301</a> | 595.3109 | 1188.6072 | 1188.5887 | 15.6   | 0 | 1 | 67 | 1 | QLVGTNEWSR                          |
| <input checked="" type="checkbox"/> | <a href="#">41</a>  | 325.1856 | 648.3566  | 648.3442  | 19.2   | 1 | 1 | 61 | 1 | SAESKK                              |
| <input checked="" type="checkbox"/> | <a href="#">146</a> | 470.7728 | 939.5310  | 939.4886  | 45.2   | 1 | 1 | 37 | 1 | TKHASGSPR                           |
| <input checked="" type="checkbox"/> | <a href="#">597</a> | 737.6961 | 2210.0665 | 2210.0160 | 22.9   | 1 | 1 | 42 | 1 | ARGTGEPASAGTSTGTSTGAGSSSR           |
| <input checked="" type="checkbox"/> | <a href="#">599</a> | 737.6978 | 2210.0716 | 2210.1167 | -20.42 | 1 | 1 | 43 | 1 | ALFASQEMWLSHRQTHLR                  |
| <input checked="" type="checkbox"/> | <a href="#">39</a>  | 325.1848 | 648.3550  | 648.3629  | -12.06 | 1 | 0 | 70 | 1 | GLGMKK + Oxidation (M)              |
| <input checked="" type="checkbox"/> | <a href="#">444</a> | 760.8801 | 1519.7456 | 1519.7493 | -2.42  | 0 | 0 | 64 | 1 | SETFLLMQFWPR + Oxidation (M)        |
| <input checked="" type="checkbox"/> | <a href="#">441</a> | 758.4306 | 1514.8466 | 1514.8000 | 30.8   | 1 | 0 | 42 | 1 | APANCLRPAPHR                        |
| <input checked="" type="checkbox"/> | <a href="#">38</a>  | 325.1841 | 648.3536  | 648.3595  | -9.02  | 0 | 0 | 76 | 1 | AFNAVK                              |
| <input checked="" type="checkbox"/> | <a href="#">618</a> | 762.0477 | 2283.1213 | 2283.2158 | -41.38 | 1 | 0 | 46 | 1 | TSGRGHPDVATMLNLLALVYR               |
| <input checked="" type="checkbox"/> | <a href="#">311</a> | 601.3107 | 1200.6068 | 1200.5748 | 26.7   | 1 | 0 | 75 | 1 | GAAGWEGGGRGAR                       |
| <input checked="" type="checkbox"/> | <a href="#">40</a>  | 325.1851 | 648.3556  | 648.3629  | -11.14 | 1 | 0 | 75 | 1 | GLGMKK + Oxidation (M)              |
| <input checked="" type="checkbox"/> | <a href="#">1</a>   | 366.1466 | 365.1393  |           |        |   |   |    |   |                                     |
| <input checked="" type="checkbox"/> | <a href="#">2</a>   | 396.9587 | 395.9514  |           |        |   |   |    |   |                                     |
| <input checked="" type="checkbox"/> | <a href="#">3</a>   | 429.0963 | 428.0890  |           |        |   |   |    |   |                                     |
| <input checked="" type="checkbox"/> | <a href="#">4</a>   | 429.1010 | 428.0937  |           |        |   |   |    |   |                                     |
| <input checked="" type="checkbox"/> | <a href="#">5</a>   | 433.1578 | 432.1505  |           |        |   |   |    |   |                                     |
| <input checked="" type="checkbox"/> | <a href="#">6</a>   | 445.1280 | 444.1207  |           |        |   |   |    |   |                                     |
| <input checked="" type="checkbox"/> | <a href="#">7</a>   | 445.1297 | 444.1224  |           |        |   |   |    |   |                                     |
| <input checked="" type="checkbox"/> | <a href="#">8</a>   | 445.1974 | 444.1901  |           |        |   |   |    |   |                                     |
| <input checked="" type="checkbox"/> | <a href="#">9</a>   | 445.1976 | 444.1903  |           |        |   |   |    |   |                                     |
| <input checked="" type="checkbox"/> | <a href="#">10</a>  | 446.2410 | 445.2337  |           |        |   |   |    |   |                                     |
| <input checked="" type="checkbox"/> | <a href="#">11</a>  | 451.1967 | 450.1894  |           |        |   |   |    |   |                                     |
| <input checked="" type="checkbox"/> | <a href="#">12</a>  | 451.2156 | 450.2083  |           |        |   |   |    |   |                                     |
| <input checked="" type="checkbox"/> | <a href="#">13</a>  | 460.2441 | 459.2368  |           |        |   |   |    |   |                                     |
| <input checked="" type="checkbox"/> | <a href="#">14</a>  | 469.2228 | 468.2155  |           |        |   |   |    |   |                                     |
| <input checked="" type="checkbox"/> | <a href="#">15</a>  | 471.2780 | 470.2707  |           |        |   |   |    |   |                                     |
| <input checked="" type="checkbox"/> | <a href="#">16</a>  | 480.2485 | 479.2412  |           |        |   |   |    |   |                                     |
| <input checked="" type="checkbox"/> | <a href="#">17</a>  | 487.3112 | 486.3039  |           |        |   |   |    |   |                                     |
| <input checked="" type="checkbox"/> | <a href="#">18</a>  | 493.2528 | 492.2455  |           |        |   |   |    |   |                                     |
| <input checked="" type="checkbox"/> | <a href="#">20</a>  | 506.2326 | 505.2253  |           |        |   |   |    |   |                                     |
| <input checked="" type="checkbox"/> | <a href="#">21</a>  | 506.2362 | 505.2289  |           |        |   |   |    |   |                                     |
| <input checked="" type="checkbox"/> | <a href="#">22</a>  | 506.2410 | 505.2337  |           |        |   |   |    |   |                                     |
| <input checked="" type="checkbox"/> | <a href="#">23</a>  | 515.2794 | 514.2721  |           |        |   |   |    |   |                                     |
| <input checked="" type="checkbox"/> | <a href="#">24</a>  | 531.3441 | 530.3368  |           |        |   |   |    |   |                                     |
| <input checked="" type="checkbox"/> | <a href="#">29</a>  | 574.3152 | 573.3079  |           |        |   |   |    |   |                                     |
| <input checked="" type="checkbox"/> | <a href="#">30</a>  | 575.2928 | 574.2855  |           |        |   |   |    |   |                                     |
| <input checked="" type="checkbox"/> | <a href="#">31</a>  | 585.2461 | 584.2388  |           |        |   |   |    |   |                                     |
| <input checked="" type="checkbox"/> | <a href="#">34</a>  | 609.0488 | 608.0415  |           |        |   |   |    |   |                                     |
| <input checked="" type="checkbox"/> | <a href="#">37</a>  | 631.3204 | 630.3131  |           |        |   |   |    |   |                                     |
| <input checked="" type="checkbox"/> | <a href="#">42</a>  | 653.3390 | 652.3317  |           |        |   |   |    |   |                                     |
| <input checked="" type="checkbox"/> | <a href="#">43</a>  | 698.3687 | 697.3614  |           |        |   |   |    |   |                                     |
| <input checked="" type="checkbox"/> | <a href="#">44</a>  | 698.3768 | 697.3695  |           |        |   |   |    |   |                                     |
| <input checked="" type="checkbox"/> | <a href="#">45</a>  | 360.7057 | 719.3968  |           |        |   |   |    |   |                                     |
| <input checked="" type="checkbox"/> | <a href="#">46</a>  | 360.7073 | 719.4000  |           |        |   |   |    |   |                                     |
| <input checked="" type="checkbox"/> | <a href="#">48</a>  | 732.3607 | 731.3534  |           |        |   |   |    |   |                                     |
| <input checked="" type="checkbox"/> | <a href="#">49</a>  | 367.4966 | 732.9786  |           |        |   |   |    |   |                                     |
| <input checked="" type="checkbox"/> | <a href="#">50</a>  | 373.6020 | 745.1894  |           |        |   |   |    |   |                                     |
| <input checked="" type="checkbox"/> | <a href="#">51</a>  | 756.3926 | 755.3853  |           |        |   |   |    |   |                                     |
| <input checked="" type="checkbox"/> | <a href="#">54</a>  | 399.7273 | 797.4400  |           |        |   |   |    |   |                                     |
| <input checked="" type="checkbox"/> | <a href="#">55</a>  | 800.3978 | 799.3905  |           |        |   |   |    |   |                                     |
| <input checked="" type="checkbox"/> | <a href="#">57</a>  | 405.7203 | 809.4260  |           |        |   |   |    |   |                                     |
| <input checked="" type="checkbox"/> | <a href="#">58</a>  | 810.4362 | 809.4289  |           |        |   |   |    |   |                                     |
| <input checked="" type="checkbox"/> | <a href="#">59</a>  | 810.4495 | 809.4422  |           |        |   |   |    |   |                                     |
| <input checked="" type="checkbox"/> | <a href="#">62</a>  | 408.2381 | 814.4616  |           |        |   |   |    |   |                                     |
| <input checked="" type="checkbox"/> | <a href="#">64</a>  | 408.2433 | 814.4720  |           |        |   |   |    |   |                                     |
| <input checked="" type="checkbox"/> | <a href="#">65</a>  | 816.8939 | 815.8866  |           |        |   |   |    |   |                                     |
| <input checked="" type="checkbox"/> | <a href="#">69</a>  | 825.3708 | 824.3635  |           |        |   |   |    |   |                                     |
| <input checked="" type="checkbox"/> | <a href="#">77</a>  | 834.3805 | 833.3732  |           |        |   |   |    |   |                                     |
| <input checked="" type="checkbox"/> | <a href="#">87</a>  | 441.2735 | 880.5324  |           |        |   |   |    |   |                                     |
| <input checked="" type="checkbox"/> | <a href="#">95</a>  | 450.7193 | 899.4240  |           |        |   |   |    |   |                                     |
| <input checked="" type="checkbox"/> | <a href="#">96</a>  | 450.7201 | 899.4256  |           |        |   |   |    |   |                                     |
| <input checked="" type="checkbox"/> | <a href="#">113</a> | 450.7239 | 899.4332  |           |        |   |   |    |   |                                     |
| <input checked="" type="checkbox"/> | <a href="#">117</a> | 452.2079 | 902.4012  |           |        |   |   |    |   |                                     |
| <input checked="" type="checkbox"/> | <a href="#">124</a> | 456.2869 | 910.5592  |           |        |   |   |    |   |                                     |
| <input checked="" type="checkbox"/> | <a href="#">127</a> | 463.2484 | 924.4822  |           |        |   |   |    |   |                                     |
| <input checked="" type="checkbox"/> | <a href="#">128</a> | 464.7739 | 927.5332  |           |        |   |   |    |   |                                     |
| <input checked="" type="checkbox"/> | <a href="#">129</a> | 464.7761 | 927.5376  |           |        |   |   |    |   |                                     |
| <input checked="" type="checkbox"/> | <a href="#">149</a> | 961.4308 | 960.4235  |           |        |   |   |    |   |                                     |

|                                     |                     |          |           |
|-------------------------------------|---------------------|----------|-----------|
| <input checked="" type="checkbox"/> | <a href="#">156</a> | 489.2438 | 976.4730  |
| <input checked="" type="checkbox"/> | <a href="#">158</a> | 491.2500 | 980.4854  |
| <input checked="" type="checkbox"/> | <a href="#">170</a> | 501.7578 | 1001.5010 |
| <input checked="" type="checkbox"/> | <a href="#">172</a> | 506.2320 | 1010.4494 |
| <input checked="" type="checkbox"/> | <a href="#">174</a> | 506.2326 | 1010.4506 |
| <input checked="" type="checkbox"/> | <a href="#">175</a> | 506.2336 | 1010.4526 |
| <input checked="" type="checkbox"/> | <a href="#">178</a> | 506.2391 | 1010.4636 |
| <input checked="" type="checkbox"/> | <a href="#">183</a> | 510.1425 | 1018.2704 |
| <input checked="" type="checkbox"/> | <a href="#">186</a> | 510.2555 | 1018.4964 |
| <input checked="" type="checkbox"/> | <a href="#">188</a> | 514.7734 | 1027.5322 |
| <input checked="" type="checkbox"/> | <a href="#">192</a> | 519.1511 | 1036.2876 |
| <input checked="" type="checkbox"/> | <a href="#">233</a> | 531.3477 | 1060.6808 |
| <input checked="" type="checkbox"/> | <a href="#">236</a> | 538.1265 | 1074.2384 |
| <input checked="" type="checkbox"/> | <a href="#">249</a> | 547.1017 | 1092.1888 |
| <input checked="" type="checkbox"/> | <a href="#">250</a> | 556.8207 | 1111.6268 |
| <input checked="" type="checkbox"/> | <a href="#">251</a> | 556.8255 | 1111.6364 |
| <input checked="" type="checkbox"/> | <a href="#">254</a> | 556.8296 | 1111.6446 |
| <input checked="" type="checkbox"/> | <a href="#">256</a> | 556.8333 | 1111.6520 |
| <input checked="" type="checkbox"/> | <a href="#">258</a> | 557.3193 | 1112.6240 |
| <input checked="" type="checkbox"/> | <a href="#">261</a> | 558.2656 | 1114.5166 |
| <input checked="" type="checkbox"/> | <a href="#">264</a> | 561.2626 | 1120.5106 |
| <input checked="" type="checkbox"/> | <a href="#">272</a> | 572.3195 | 1142.6244 |
| <input checked="" type="checkbox"/> | <a href="#">284</a> | 579.8302 | 1157.6458 |
| <input checked="" type="checkbox"/> | <a href="#">291</a> | 588.3398 | 1174.6650 |
| <input checked="" type="checkbox"/> | <a href="#">292</a> | 592.3085 | 1182.6024 |
| <input checked="" type="checkbox"/> | <a href="#">293</a> | 595.3043 | 1188.5940 |
| <input checked="" type="checkbox"/> | <a href="#">296</a> | 595.3077 | 1188.6008 |
| <input checked="" type="checkbox"/> | <a href="#">297</a> | 595.3081 | 1188.6016 |
| <input checked="" type="checkbox"/> | <a href="#">298</a> | 595.3089 | 1188.6032 |
| <input checked="" type="checkbox"/> | <a href="#">299</a> | 595.3093 | 1188.6040 |
| <input checked="" type="checkbox"/> | <a href="#">300</a> | 595.3095 | 1188.6044 |
| <input checked="" type="checkbox"/> | <a href="#">303</a> | 595.3124 | 1188.6102 |
| <input checked="" type="checkbox"/> | <a href="#">320</a> | 622.7780 | 1243.5414 |
| <input checked="" type="checkbox"/> | <a href="#">323</a> | 622.7885 | 1243.5624 |
| <input checked="" type="checkbox"/> | <a href="#">329</a> | 622.7941 | 1243.5736 |
| <input checked="" type="checkbox"/> | <a href="#">330</a> | 622.7943 | 1243.5740 |
| <input checked="" type="checkbox"/> | <a href="#">332</a> | 624.3058 | 1246.5970 |
| <input checked="" type="checkbox"/> | <a href="#">350</a> | 645.3189 | 1288.6232 |
| <input checked="" type="checkbox"/> | <a href="#">351</a> | 645.8275 | 1289.6404 |
| <input checked="" type="checkbox"/> | <a href="#">352</a> | 645.8320 | 1289.6494 |
| <input checked="" type="checkbox"/> | <a href="#">355</a> | 651.8354 | 1301.6562 |
| <input checked="" type="checkbox"/> | <a href="#">396</a> | 672.8417 | 1343.6688 |
| <input checked="" type="checkbox"/> | <a href="#">400</a> | 683.9808 | 1365.9470 |
| <input checked="" type="checkbox"/> | <a href="#">406</a> | 696.3622 | 1390.7098 |
| <input checked="" type="checkbox"/> | <a href="#">408</a> | 699.8883 | 1397.7620 |
| <input checked="" type="checkbox"/> | <a href="#">409</a> | 699.8900 | 1397.7654 |
| <input checked="" type="checkbox"/> | <a href="#">410</a> | 699.8941 | 1397.7736 |
| <input checked="" type="checkbox"/> | <a href="#">413</a> | 702.3684 | 1402.7222 |
| <input checked="" type="checkbox"/> | <a href="#">421</a> | 728.3550 | 1454.6954 |
| <input checked="" type="checkbox"/> | <a href="#">426</a> | 729.4035 | 1456.7924 |
| <input checked="" type="checkbox"/> | <a href="#">427</a> | 732.3361 | 1462.6576 |
| <input checked="" type="checkbox"/> | <a href="#">435</a> | 740.3751 | 1478.7356 |
| <input checked="" type="checkbox"/> | <a href="#">436</a> | 748.8556 | 1495.6966 |
| <input checked="" type="checkbox"/> | <a href="#">438</a> | 757.8587 | 1513.7028 |
| <input checked="" type="checkbox"/> | <a href="#">439</a> | 757.8616 | 1513.7086 |
| <input checked="" type="checkbox"/> | <a href="#">440</a> | 757.8618 | 1513.7090 |
| <input checked="" type="checkbox"/> | <a href="#">445</a> | 766.8646 | 1531.7146 |
| <input checked="" type="checkbox"/> | <a href="#">446</a> | 766.8663 | 1531.7180 |
| <input checked="" type="checkbox"/> | <a href="#">447</a> | 775.8678 | 1549.7210 |
| <input checked="" type="checkbox"/> | <a href="#">448</a> | 775.8699 | 1549.7252 |
| <input checked="" type="checkbox"/> | <a href="#">449</a> | 785.8380 | 1569.6614 |
| <input checked="" type="checkbox"/> | <a href="#">450</a> | 785.8396 | 1569.6646 |
| <input checked="" type="checkbox"/> | <a href="#">451</a> | 785.8400 | 1569.6654 |
| <input checked="" type="checkbox"/> | <a href="#">452</a> | 785.8427 | 1569.6708 |
| <input checked="" type="checkbox"/> | <a href="#">453</a> | 785.8429 | 1569.6712 |
| <input checked="" type="checkbox"/> | <a href="#">454</a> | 785.8431 | 1569.6716 |
| <input checked="" type="checkbox"/> | <a href="#">455</a> | 785.8436 | 1569.6726 |
| <input checked="" type="checkbox"/> | <a href="#">456</a> | 785.8438 | 1569.6730 |
| <input checked="" type="checkbox"/> | <a href="#">457</a> | 785.8450 | 1569.6754 |
| <input checked="" type="checkbox"/> | <a href="#">458</a> | 785.8452 | 1569.6758 |
| <input checked="" type="checkbox"/> | <a href="#">459</a> | 785.8453 | 1569.6760 |
| <input checked="" type="checkbox"/> | <a href="#">460</a> | 785.8453 | 1569.6760 |
| <input checked="" type="checkbox"/> | <a href="#">461</a> | 785.8457 | 1569.6768 |
| <input checked="" type="checkbox"/> | <a href="#">462</a> | 785.8459 | 1569.6772 |
| <input checked="" type="checkbox"/> | <a href="#">463</a> | 785.8464 | 1569.6782 |
| <input checked="" type="checkbox"/> | <a href="#">464</a> | 785.8467 | 1569.6788 |
| <input checked="" type="checkbox"/> | <a href="#">465</a> | 785.8488 | 1569.6830 |
| <input checked="" type="checkbox"/> | <a href="#">466</a> | 785.8490 | 1569.6834 |
| <input checked="" type="checkbox"/> | <a href="#">467</a> | 785.8494 | 1569.6842 |
| <input checked="" type="checkbox"/> | <a href="#">468</a> | 785.8496 | 1569.6846 |
| <input checked="" type="checkbox"/> | <a href="#">469</a> | 785.8498 | 1569.6850 |

|                                     |                     |           |           |
|-------------------------------------|---------------------|-----------|-----------|
| <input checked="" type="checkbox"/> | <a href="#">470</a> | 785.8501  | 1569.6856 |
| <input checked="" type="checkbox"/> | <a href="#">471</a> | 785.8507  | 1569.6868 |
| <input checked="" type="checkbox"/> | <a href="#">472</a> | 785.8522  | 1569.6898 |
| <input checked="" type="checkbox"/> | <a href="#">473</a> | 785.8538  | 1569.6930 |
| <input checked="" type="checkbox"/> | <a href="#">474</a> | 785.8539  | 1569.6932 |
| <input checked="" type="checkbox"/> | <a href="#">475</a> | 794.8428  | 1587.6710 |
| <input checked="" type="checkbox"/> | <a href="#">476</a> | 794.8445  | 1587.6744 |
| <input checked="" type="checkbox"/> | <a href="#">478</a> | 795.3523  | 1588.6900 |
| <input checked="" type="checkbox"/> | <a href="#">489</a> | 808.9011  | 1615.7876 |
| <input checked="" type="checkbox"/> | <a href="#">494</a> | 811.3594  | 1620.7042 |
| <input checked="" type="checkbox"/> | <a href="#">495</a> | 811.3651  | 1620.7156 |
| <input checked="" type="checkbox"/> | <a href="#">498</a> | 816.8893  | 1631.7640 |
| <input checked="" type="checkbox"/> | <a href="#">499</a> | 816.8903  | 1631.7660 |
| <input checked="" type="checkbox"/> | <a href="#">502</a> | 816.8928  | 1631.7710 |
| <input checked="" type="checkbox"/> | <a href="#">525</a> | 816.8995  | 1631.7844 |
| <input checked="" type="checkbox"/> | <a href="#">536</a> | 852.4309  | 1702.8472 |
| <input checked="" type="checkbox"/> | <a href="#">538</a> | 858.4859  | 1714.9572 |
| <input checked="" type="checkbox"/> | <a href="#">541</a> | 885.9580  | 1769.9014 |
| <input checked="" type="checkbox"/> | <a href="#">543</a> | 890.3994  | 1778.7842 |
| <input checked="" type="checkbox"/> | <a href="#">544</a> | 893.3851  | 1784.7556 |
| <input checked="" type="checkbox"/> | <a href="#">553</a> | 897.9139  | 1793.8132 |
| <input checked="" type="checkbox"/> | <a href="#">555</a> | 906.4707  | 1810.9268 |
| <input checked="" type="checkbox"/> | <a href="#">563</a> | 644.9491  | 1931.8255 |
| <input checked="" type="checkbox"/> | <a href="#">564</a> | 973.5184  | 1945.0222 |
| <input checked="" type="checkbox"/> | <a href="#">565</a> | 650.9495  | 1949.8267 |
| <input checked="" type="checkbox"/> | <a href="#">574</a> | 1024.5062 | 2046.9978 |
| <input checked="" type="checkbox"/> | <a href="#">585</a> | 1048.9791 | 2095.9436 |
| <input checked="" type="checkbox"/> | <a href="#">586</a> | 701.6427  | 2101.9063 |
| <input checked="" type="checkbox"/> | <a href="#">587</a> | 701.6429  | 2101.9069 |
| <input checked="" type="checkbox"/> | <a href="#">589</a> | 707.3322  | 2118.9748 |
| <input checked="" type="checkbox"/> | <a href="#">591</a> | 1073.0271 | 2144.0396 |
| <input checked="" type="checkbox"/> | <a href="#">592</a> | 732.0169  | 2193.0289 |
| <input checked="" type="checkbox"/> | <a href="#">593</a> | 732.0259  | 2193.0559 |
| <input checked="" type="checkbox"/> | <a href="#">595</a> | 737.6949  | 2210.0629 |
| <input checked="" type="checkbox"/> | <a href="#">596</a> | 737.6956  | 2210.0650 |
| <input checked="" type="checkbox"/> | <a href="#">598</a> | 737.6977  | 2210.0713 |
| <input checked="" type="checkbox"/> | <a href="#">601</a> | 737.6991  | 2210.0755 |
| <input checked="" type="checkbox"/> | <a href="#">602</a> | 737.7005  | 2210.0797 |
| <input checked="" type="checkbox"/> | <a href="#">608</a> | 737.7048  | 2210.0926 |
| <input checked="" type="checkbox"/> | <a href="#">609</a> | 737.7054  | 2210.0944 |
| <input checked="" type="checkbox"/> | <a href="#">611</a> | 737.7095  | 2210.1067 |
| <input checked="" type="checkbox"/> | <a href="#">613</a> | 756.0691  | 2265.1855 |
| <input checked="" type="checkbox"/> | <a href="#">616</a> | 761.7196  | 2282.1370 |
| <input checked="" type="checkbox"/> | <a href="#">619</a> | 762.0505  | 2283.1297 |
| <input checked="" type="checkbox"/> | <a href="#">623</a> | 762.0542  | 2283.1408 |
| <input checked="" type="checkbox"/> | <a href="#">628</a> | 762.0628  | 2283.1666 |
| <input checked="" type="checkbox"/> | <a href="#">629</a> | 768.7164  | 2303.1274 |
| <input checked="" type="checkbox"/> | <a href="#">630</a> | 779.0418  | 2334.1036 |
| <input checked="" type="checkbox"/> | <a href="#">631</a> | 1168.5664 | 2335.1182 |
| <input checked="" type="checkbox"/> | <a href="#">633</a> | 779.7078  | 2336.1016 |
| <input checked="" type="checkbox"/> | <a href="#">636</a> | 779.7141  | 2336.1205 |
| <input checked="" type="checkbox"/> | <a href="#">638</a> | 779.7175  | 2336.1307 |
| <input checked="" type="checkbox"/> | <a href="#">639</a> | 779.7218  | 2336.1436 |
| <input checked="" type="checkbox"/> | <a href="#">642</a> | 784.0617  | 2349.1633 |
| <input checked="" type="checkbox"/> | <a href="#">654</a> | 888.7457  | 2663.2153 |
| <input checked="" type="checkbox"/> | <a href="#">673</a> | 888.7603  | 2663.2591 |
| <input checked="" type="checkbox"/> | <a href="#">678</a> | 916.4274  | 2746.2604 |
| <input checked="" type="checkbox"/> | <a href="#">679</a> | 916.7508  | 2747.2306 |
| <input checked="" type="checkbox"/> | <a href="#">680</a> | 917.0808  | 2748.2206 |
| <input checked="" type="checkbox"/> | <a href="#">681</a> | 917.0816  | 2748.2230 |
| <input checked="" type="checkbox"/> | <a href="#">682</a> | 933.4417  | 2797.3033 |
| <input checked="" type="checkbox"/> | <a href="#">683</a> | 933.4421  | 2797.3045 |
| <input checked="" type="checkbox"/> | <a href="#">684</a> | 933.4461  | 2797.3165 |
| <input checked="" type="checkbox"/> | <a href="#">686</a> | 933.4491  | 2797.3255 |
| <input checked="" type="checkbox"/> | <a href="#">687</a> | 933.4591  | 2797.3555 |
| <input checked="" type="checkbox"/> | <a href="#">689</a> | 933.7738  | 2798.2996 |
| <input checked="" type="checkbox"/> | <a href="#">690</a> | 933.7778  | 2798.3116 |
| <input checked="" type="checkbox"/> | <a href="#">694</a> | 961.4198  | 2881.2376 |
| <input checked="" type="checkbox"/> | <a href="#">695</a> | 961.4268  | 2881.2586 |
| <input checked="" type="checkbox"/> | <a href="#">696</a> | 961.4318  | 2881.2736 |
| <input checked="" type="checkbox"/> | <a href="#">697</a> | 961.7681  | 2882.2825 |
| <input checked="" type="checkbox"/> | <a href="#">699</a> | 972.0930  | 2913.2572 |
| <input checked="" type="checkbox"/> | <a href="#">700</a> | 972.0975  | 2913.2707 |
| <input checked="" type="checkbox"/> | <a href="#">701</a> | 972.4227  | 2914.2463 |
| <input checked="" type="checkbox"/> | <a href="#">703</a> | 1308.9585 | 3923.8537 |
| <input checked="" type="checkbox"/> | <a href="#">704</a> | 981.9737  | 3923.8657 |
| <input checked="" type="checkbox"/> | <a href="#">706</a> | 1308.9722 | 3923.8948 |
| <input checked="" type="checkbox"/> | <a href="#">707</a> | 982.2178  | 3924.8421 |
| <input checked="" type="checkbox"/> | <a href="#">708</a> | 1314.2834 | 3939.8284 |
| <input checked="" type="checkbox"/> | <a href="#">709</a> | 1130.9587 | 4519.8057 |
| <input checked="" type="checkbox"/> | <a href="#">710</a> | 1308.8093 | 5231.2081 |

---

### Search Parameters

Type of search : MS/MS Ion Search  
Enzyme : Trypsin  
Fixed modifications : Carbamidomethyl (C)  
Variable modifications : Oxidation (M)  
Mass values : Monoisotopic  
Protein Mass : Unrestricted  
Peptide Mass Tolerance :  $\pm 50$  ppm  
Fragment Mass Tolerance:  $\pm 0.2$  Da  
Max Missed Cleavages : 1  
Instrument type : ESI-QUAD-TOF  
Number of queries : 710

Mascot: <http://www.matrixscience.com/>



## Mascot Search Results

**User** : Dominic  
**Email** : dominic.kurian@bbsrc.ac.uk  
**Search title** : IPI Mouse\_15-02-2010  
**MS data file** : D:\Peaklist\Dominic Kurian\QToF\DK20010804 GATC P 0010882.pk1  
**Database** : IPI\_mouse MOUSE\_v3\_79 (54943 sequences; 24917557 residues)  
**Timestamp** : 15 Feb 2011 at 15:23:00 GMT  
**Protein hits** :

|                             |              |                           |                                                                          |
|-----------------------------|--------------|---------------------------|--------------------------------------------------------------------------|
| <a href="#">IPI00420725</a> | Tax_Id=10090 | Gene_Symbol=Camk2a        | Uncharacterized protein                                                  |
| <a href="#">IPI00474502</a> | Tax_Id=10090 | Gene_Symbol=Camk2b        | Calcium/calmodulin-dependent protein kinase type II subunit beta         |
| <a href="#">IPI00109073</a> | Tax_Id=10090 | Gene_Symbol=Tubb4         | Tubulin beta-4 chain                                                     |
| <a href="#">IPI00169463</a> | Tax_Id=10090 | Gene_Symbol=Tubb2c        | Tubulin beta-2C chain                                                    |
| <a href="#">IPI00124695</a> | Tax_Id=10090 | Gene_Symbol=Camk2g        | Isoform 1 of Calcium/calmodulin-dependent protein kinase type II subunit |
| <a href="#">IPI00117352</a> | Tax_Id=10090 | Gene_Symbol=Tubb5         | Tubulin beta-5 chain                                                     |
| <a href="#">IPI00109061</a> | Tax_Id=10090 | Gene_Symbol=Tubb2b        | Tubulin beta-2B chain                                                    |
| <a href="#">IPI00112251</a> | Tax_Id=10090 | Gene_Symbol=Tubb3         | Tubulin beta-3 chain                                                     |
| <a href="#">IPI00755181</a> | Tax_Id=10090 | Gene_Symbol=Krt10         | keratin, type I cytoskeletal 10                                          |
| <a href="#">IPI00110753</a> | Tax_Id=10090 | Gene_Symbol=Tubala        | Tubulin alpha-1A chain                                                   |
| <a href="#">IPI00112584</a> | Tax_Id=10090 | Gene_Symbol=Camk2d        | Isoform 1 of Calcium/calmodulin-dependent protein kinase type II subunit |
| <a href="#">IPI00608020</a> | Tax_Id=10090 | Gene_Symbol=Ftl1          | ferritin light chain 1                                                   |
| <a href="#">IPI00122928</a> | Tax_Id=10090 | Gene_Symbol=Tubb6         | Tubulin beta-6 chain                                                     |
| <a href="#">IPI00347110</a> | Tax_Id=10090 | Gene_Symbol=Krt73         | Keratin, type II cytoskeletal 73                                         |
| <a href="#">IPI00122048</a> | Tax_Id=10090 | Gene_Symbol=Atpla3        | Sodium/potassium-transporting ATPase subunit alpha-3                     |
| <a href="#">IPI00138892</a> | Tax_Id=10090 | Gene_Symbol=Uba52         | Ubiquitin-60S ribosomal protein L40                                      |
| <a href="#">IPI00625729</a> | Tax_Id=10090 | Gene_Symbol=Krt1          | Keratin, type II cytoskeletal 1                                          |
| <a href="#">IPI00136703</a> | Tax_Id=10090 | Gene_Symbol=Ckb           | Creatine kinase B-type                                                   |
| <a href="#">IPI00110850</a> | Tax_Id=10090 | Gene_Symbol=Actb          | Actin, cytoplasmic 1                                                     |
| <a href="#">IPI00221797</a> | Tax_Id=10090 | Gene_Symbol=Krt75         | Keratin, type II cytoskeletal 75                                         |
| <a href="#">IPI00348328</a> | Tax_Id=10090 | Gene_Symbol=Krt78         | keratin Kb40                                                             |
| <a href="#">IPI00322209</a> | Tax_Id=10090 | Gene_Symbol=Krt8          | Keratin, type II cytoskeletal 8                                          |
| <a href="#">IPI00221528</a> | Tax_Id=10090 | Gene_Symbol=Actb12        | Beta-actin-like protein 2                                                |
| <a href="#">IPI00124499</a> | Tax_Id=10090 | Gene_Symbol=Krt79         | Keratin, type II cytoskeletal 79                                         |
| <a href="#">IPI00230145</a> | Tax_Id=10090 | Gene_Symbol=Fth1          | Ferritin heavy chain                                                     |
| <a href="#">IPI00406377</a> | Tax_Id=10090 | Gene_Symbol=Krt7          | Keratin, type II cytoskeletal 7                                          |
| <a href="#">IPI00222228</a> | Tax_Id=10090 | Gene_Symbol=4732456N10Rik | hypothetical protein LOC239673                                           |
| <a href="#">IPI00135284</a> | Tax_Id=10090 | Gene_Symbol=Gml6374       | Glyceraldehyde-3-phosphate dehydrogenase                                 |
| <a href="#">IPI00134997</a> | Tax_Id=10090 | Gene_Symbol=Dlgap3        | Disks large-associated protein 3                                         |
| <a href="#">IPI00348094</a> | Tax_Id=10090 | Gene_Symbol=Tubb1         | Tubulin, beta 1                                                          |
| <a href="#">IPI00115546</a> | Tax_Id=10090 | Gene_Symbol=Gnao1         | Isoform Alpha-2 of Guanine nucleotide-binding protein G(o) subunit alpha |
| <a href="#">IPI00122094</a> | Tax_Id=10090 | Gene_Symbol=Dlg4          | Isoform 2 of Disks large homolog 4                                       |
| <a href="#">IPI00119667</a> | Tax_Id=10090 | Gene_Symbol=Eef1a2        | Elongation factor 1-alpha 2                                              |
| <a href="#">IPI00135197</a> | Tax_Id=10090 | Gene_Symbol=Krt20         | Keratin, type I cytoskeletal 20                                          |
| <a href="#">IPI00467833</a> | Tax_Id=10090 | Gene_Symbol=Tpi1          | triosephosphate isomerase                                                |
| <a href="#">IPI00118569</a> | Tax_Id=10090 | Gene_Symbol=Gna13         | Guanine nucleotide-binding protein subunit alpha-13                      |
| <a href="#">IPI00462072</a> | Tax_Id=10090 | Gene_Symbol=Eno1;Gm5506   | Alpha-enolase                                                            |
| <a href="#">IPI00120793</a> | Tax_Id=10090 | Gene_Symbol=Prnp          | Major prion protein                                                      |
| <a href="#">IPI00113410</a> | Tax_Id=10090 | Gene_Symbol=Hapln2        | Hyaluronan and proteoglycan link protein 2                               |
| <a href="#">IPI00622240</a> | Tax_Id=10090 | Gene_Symbol=Krt2          | Keratin, type II cytoskeletal 2 epidermal                                |

### IPI\_mouse [Decoy](#) False discovery rate

|                                                      |     |   |        |
|------------------------------------------------------|-----|---|--------|
| Peptide matches above identity threshold             | 164 | 0 | 0.00 % |
| Peptide matches above homology or identity threshold | 182 | 0 | 0.00 % |

### Probability Based Mowse Score

Ions score is  $-10 \cdot \log(P)$ , where P is the probability that the observed match is a random event.  
 Individual ions scores > 37 indicate identity or extensive homology (p<0.01).  
 Protein scores are derived from ions scores as a non-probabilistic basis for ranking protein hits.

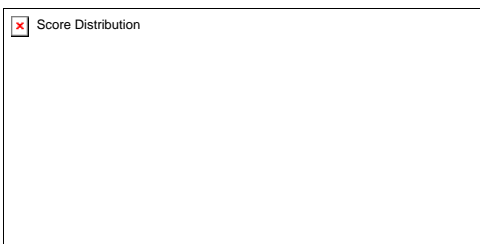

### Peptide Summary Report

Peptide Summary

Significance threshold  $p < 0.01$       Max. number of hits

Standard scoring  MudPIT scoring  Ions score or expect cut-off       Show sub-sets

Show pop-ups  Suppress pop-ups  Sort unassigned   Require bold red

Error tolerant

- [IPI00420725](#)    Mass: 55882    Score: 1121    Queries matched: 76    emPAI: 0.77  
 Tax\_Id=10090 Gene\_Symbol=Camk2a Uncharacterized protein  
 Check to include this hit in error tolerant search or archive report



| Query               | Observed        | Mr(expt)         | Mr(calc)         | ppm         | Miss     | Score      | Expect    | Rank     | Peptide                         |
|---------------------|-----------------|------------------|------------------|-------------|----------|------------|-----------|----------|---------------------------------|
| <a href="#">27</a>  | 588.3868        | 587.3795         | 587.3642         | 26.0        | 0        | 22         | 0.71      | 1        | K.IINTK.K                       |
| <a href="#">69</a>  | 432.7315        | 863.4484         | 863.4501         | -1.94       | 0        | 23         | 0.56      | 1        | R.SGAPSVLPH.-                   |
| <a href="#">90</a>  | 452.2513        | 902.4880         | 902.4895         | -1.63       | 0        | 21         | 0.9       | 1        | K.MLTINFSK.R                    |
| <a href="#">139</a> | 525.2845        | 1048.5544        | 1048.5553        | -0.80       | 0        | (45)       | 0.0029    | 1        | K.VLAGQEYAAK.I                  |
| <a href="#">140</a> | 525.2850        | 1048.5554        | 1048.5553        | 0.16        | 0        | (33)       | 0.044     | 1        | K.VLAGQEYAAK.I                  |
| <a href="#">141</a> | 525.2850        | 1048.5554        | 1048.5553        | 0.16        | 0        | (39)       | 0.01      | 1        | K.VLAGQEYAAK.I                  |
| <a href="#">142</a> | 525.2855        | 1048.5564        | 1048.5553        | 1.11        | 0        | 54         | 0.00031   | 1        | K.VLAGQEYAAK.I                  |
| <a href="#">143</a> | 525.2856        | 1048.5566        | 1048.5553        | 1.30        | 0        | (22)       | 0.49      | 1        | K.VLAGQEYAAK.I                  |
| <a href="#">144</a> | 525.2864        | 1048.5582        | 1048.5553        | 2.83        | 0        | (47)       | 0.0015    | 1        | K.VLAGQEYAAK.I                  |
| <a href="#">201</a> | 574.3237        | 1146.6328        | 1146.6431        | -8.91       | 0        | (39)       | 0.0079    | 1        | K.GAILTTMLATR.N                 |
| <a href="#">202</a> | 574.3245        | 1146.6344        | 1146.6431        | -7.52       | 0        | (51)       | 0.00057   | 1        | K.GAILTTMLATR.N                 |
| <a href="#">204</a> | 574.3274        | 1146.6402        | 1146.6431        | -2.46       | 0        | (36)       | 0.014     | 1        | K.GAILTTMLATR.N                 |
| <a href="#">205</a> | 574.3279        | 1146.6412        | 1146.6431        | -1.59       | 0        | (49)       | 0.00074   | 1        | K.GAILTTMLATR.N                 |
| <a href="#">206</a> | 574.3290        | 1146.6434        | 1146.6431        | 0.33        | 0        | (24)       | 0.21      | 1        | K.GAILTTMLATR.N                 |
| <a href="#">207</a> | 574.3298        | 1146.6450        | 1146.6431        | 1.73        | 0        | 63         | 2.6e-005  | 1        | K.GAILTTMLATR.N                 |
| <a href="#">216</a> | 582.3226        | 1162.6306        | 1162.6380        | -6.31       | 0        | (28)       | 0.097     | 1        | K.GAILTTMLATR.N + Oxidation (M) |
| <a href="#">256</a> | 631.3042        | 1260.5938        | 1260.5927        | 0.88        | 0        | 62         | 4.5e-005  | 1        | R.FYFENLWSR.N                   |
| <a href="#">257</a> | 631.3046        | 1260.5946        | 1260.5927        | 1.51        | 0        | (49)       | 0.00083   | 1        | R.FYFENLWSR.N                   |
| <a href="#">258</a> | 631.3048        | 1260.5950        | 1260.5927        | 1.83        | 0        | (54)       | 0.00028   | 1        | R.FYFENLWSR.N                   |
| <a href="#">259</a> | 631.3049        | 1260.5952        | 1260.5927        | 1.99        | 0        | (58)       | 0.00011   | 1        | R.FYFENLWSR.N                   |
| <a href="#">260</a> | 631.3054        | 1260.5962        | 1260.5927        | 2.78        | 0        | (58)       | 0.00011   | 1        | R.FYFENLWSR.N                   |
| <a href="#">261</a> | 631.3054        | 1260.5962        | 1260.5927        | 2.78        | 0        | (37)       | 0.012     | 1        | R.FYFENLWSR.N                   |
| <a href="#">262</a> | 631.3058        | 1260.5970        | 1260.5927        | 3.42        | 0        | (41)       | 0.0055    | 1        | R.FYFENLWSR.N                   |
| <a href="#">263</a> | 631.3059        | 1260.5972        | 1260.5927        | 3.57        | 0        | (58)       | 0.00011   | 1        | R.FYFENLWSR.N                   |
| <a href="#">264</a> | 631.3059        | 1260.5972        | 1260.5927        | 3.57        | 0        | (35)       | 0.022     | 1        | R.FYFENLWSR.N                   |
| <a href="#">265</a> | 631.3066        | 1260.5986        | 1260.5927        | 4.68        | 0        | (29)       | 0.086     | 1        | R.FYFENLWSR.N                   |
| <a href="#">266</a> | 631.3085        | 1260.6024        | 1260.5927        | 7.70        | 0        | (59)       | 9.9e-005  | 1        | R.FYFENLWSR.N                   |
| <a href="#">268</a> | <b>631.3294</b> | <b>1260.6442</b> | <b>1260.5927</b> | <b>40.9</b> | <b>0</b> | <b>(4)</b> | <b>35</b> | <b>3</b> | <b>R.FYFENLWSR.N</b>            |
| <a href="#">294</a> | 652.3510        | 1302.6874        | 1302.6932        | -4.41       | 0        | (72)       | 5e-006    | 1        | R.ITQYLDAGGIPR.T                |
| <a href="#">295</a> | 652.3511        | 1302.6876        | 1302.6932        | -4.26       | 0        | (72)       | 5.2e-006  | 1        | R.ITQYLDAGGIPR.T                |
| <a href="#">296</a> | 652.3549        | 1302.6952        | 1302.6932        | 1.58        | 0        | (60)       | 6.7e-005  | 1        | R.ITQYLDAGGIPR.T                |
| <a href="#">297</a> | 652.3553        | 1302.6960        | 1302.6932        | 2.19        | 0        | (69)       | 8.8e-006  | 1        | R.ITQYLDAGGIPR.T                |
| <a href="#">298</a> | 652.3554        | 1302.6962        | 1302.6932        | 2.35        | 0        | (77)       | 1.4e-006  | 1        | R.ITQYLDAGGIPR.T                |
| <a href="#">299</a> | 652.3554        | 1302.6962        | 1302.6932        | 2.35        | 0        | 77         | 1.3e-006  | 1        | R.ITQYLDAGGIPR.T                |
| <a href="#">300</a> | 652.3558        | 1302.6970        | 1302.6932        | 2.96        | 0        | (77)       | 1.5e-006  | 1        | R.ITQYLDAGGIPR.T                |
| <a href="#">301</a> | 652.3565        | 1302.6984        | 1302.6932        | 4.03        | 0        | (69)       | 9.5e-006  | 1        | R.ITQYLDAGGIPR.T                |
| <a href="#">491</a> | 816.8912        | 1631.7678        | 1631.7719        | -2.47       | 0        | (42)       | 0.0039    | 1        | R.FTEEQQLFEELGK.G               |
| <a href="#">492</a> | 816.8919        | 1631.7692        | 1631.7719        | -1.61       | 0        | (33)       | 0.034     | 1        | R.FTEEQQLFEELGK.G               |
| <a href="#">493</a> | 816.8925        | 1631.7704        | 1631.7719        | -0.88       | 0        | (18)       | 1         | 1        | R.FTEEQQLFEELGK.G               |
| <a href="#">494</a> | 816.8930        | 1631.7714        | 1631.7719        | -0.27       | 0        | (64)       | 2.4e-005  | 1        | R.FTEEQQLFEELGK.G               |
| <a href="#">495</a> | 816.8931        | 1631.7716        | 1631.7719        | -0.14       | 0        | (38)       | 0.011     | 1        | R.FTEEQQLFEELGK.G               |
| <a href="#">496</a> | 816.8934        | 1631.7722        | 1631.7719        | 0.22        | 0        | (5)        | 20        | 1        | R.FTEEQQLFEELGK.G               |
| <a href="#">498</a> | 816.8940        | 1631.7734        | 1631.7719        | 0.96        | 0        | (65)       | 1.8e-005  | 1        | R.FTEEQQLFEELGK.G               |
| <a href="#">500</a> | 816.8945        | 1631.7744        | 1631.7719        | 1.57        | 0        | (43)       | 0.003     | 1        | R.FTEEQQLFEELGK.G               |
| <a href="#">501</a> | 816.8950        | 1631.7754        | 1631.7719        | 2.19        | 0        | (48)       | 0.001     | 1        | R.FTEEQQLFEELGK.G               |
| <a href="#">503</a> | 816.8951        | 1631.7756        | 1631.7719        | 2.31        | 0        | 70         | 5.7e-006  | 1        | R.FTEEQQLFEELGK.G               |
| <a href="#">504</a> | 816.8952        | 1631.7758        | 1631.7719        | 2.43        | 0        | (3)        | 29        | 1        | R.FTEEQQLFEELGK.G               |
| <a href="#">505</a> | 816.8954        | 1631.7762        | 1631.7719        | 2.68        | 0        | (64)       | 2.8e-005  | 1        | R.FTEEQQLFEELGK.G               |
| <a href="#">506</a> | 816.8964        | 1631.7782        | 1631.7719        | 3.90        | 0        | (23)       | 0.35      | 1        | R.FTEEQQLFEELGK.G               |
| <a href="#">507</a> | 816.8967        | 1631.7788        | 1631.7719        | 4.27        | 0        | (63)       | 2.9e-005  | 1        | R.FTEEQQLFEELGK.G               |
| <a href="#">508</a> | 816.8970        | 1631.7794        | 1631.7719        | 4.64        | 0        | (48)       | 0.001     | 1        | R.FTEEQQLFEELGK.G               |
| <a href="#">509</a> | 816.8970        | 1631.7794        | 1631.7719        | 4.64        | 0        | (37)       | 0.014     | 1        | R.FTEEQQLFEELGK.G               |
| <a href="#">510</a> | 816.8972        | 1631.7798        | 1631.7719        | 4.88        | 0        | (50)       | 0.00068   | 1        | R.FTEEQQLFEELGK.G               |
| <a href="#">511</a> | 816.8972        | 1631.7798        | 1631.7719        | 4.88        | 0        | (38)       | 0.0091    | 1        | R.FTEEQQLFEELGK.G               |
| <a href="#">512</a> | 816.8990        | 1631.7834        | 1631.7719        | 7.09        | 0        | (37)       | 0.012     | 1        | R.FTEEQQLFEELGK.G               |
| <a href="#">513</a> | 816.8997        | 1631.7848        | 1631.7719        | 7.95        | 0        | (2)        | 42        | 1        | R.FTEEQQLFEELGK.G               |
| <a href="#">646</a> | 694.3165        | 2079.9277        | 2079.9426        | -7.15       | 0        | (51)       | 0.0003    | 1        | K.AGAYDFPSPEWDTVTPEAK.D         |
| <a href="#">647</a> | 694.3185        | 2079.9337        | 2079.9426        | -4.27       | 0        | (60)       | 3.8e-005  | 1        | K.AGAYDFPSPEWDTVTPEAK.D         |
| <a href="#">648</a> | 1040.9807       | 2079.9468        | 2079.9426        | 2.07        | 0        | (60)       | 4.5e-005  | 1        | K.AGAYDFPSPEWDTVTPEAK.D         |
| <a href="#">649</a> | 1040.9808       | 2079.9470        | 2079.9426        | 2.16        | 0        | (43)       | 0.0021    | 1        | K.AGAYDFPSPEWDTVTPEAK.D         |
| <a href="#">650</a> | 1040.9817       | 2079.9488        | 2079.9426        | 3.03        | 0        | (53)       | 0.0002    | 1        | K.AGAYDFPSPEWDTVTPEAK.D         |
| <a href="#">651</a> | 1040.9820       | 2079.9494        | 2079.9426        | 3.32        | 0        | (56)       | 0.00011   | 1        | K.AGAYDFPSPEWDTVTPEAK.D         |
| <a href="#">652</a> | 1040.9820       | 2079.9494        | 2079.9426        | 3.32        | 0        | (50)       | 0.00046   | 1        | K.AGAYDFPSPEWDTVTPEAK.D         |
| <a href="#">653</a> | 1040.9828       | 2079.9510        | 2079.9426        | 4.09        | 0        | (45)       | 0.0013    | 1        | K.AGAYDFPSPEWDTVTPEAK.D         |
| <a href="#">654</a> | 1040.9838       | 2079.9530        | 2079.9426        | 5.05        | 0        | 74         | 1.9e-006  | 1        | K.AGAYDFPSPEWDTVTPEAK.D         |
| <a href="#">655</a> | 1040.9847       | 2079.9548        | 2079.9426        | 5.91        | 0        | (34)       | 0.019     | 1        | K.AGAYDFPSPEWDTVTPEAK.D         |
| <a href="#">662</a> | 715.3441        | 2143.0105        | 2143.0321        | -10.08      | 0        | 61         | 4.1e-005  | 1        | K.VTEQLIEAISNGDFESYTK.M         |
| <a href="#">663</a> | 1072.5222       | 2143.0298        | 2143.0321        | -1.04       | 0        | (38)       | 0.0075    | 1        | K.VTEQLIEAISNGDFESYTK.M         |
| <a href="#">664</a> | 1072.5251       | 2143.0356        | 2143.0321        | 1.67        | 0        | (54)       | 0.00019   | 1        | K.VTEQLIEAISNGDFESYTK.M         |
| <a href="#">665</a> | 1072.5334       | 2143.0522        | 2143.0321        | 9.41        | 0        | (11)       | 4.6       | 1        | K.VTEQLIEAISNGDFESYTK.M         |
| <a href="#">696</a> | 888.7555        | 2663.2447        | 2663.2755        | -11.57      | 1        | (27)       | 0.084     | 1        | K.AGAYDFPSPEWDTVTPEAKDLINK.M    |
| <a href="#">697</a> | 888.7577        | 2663.2513        | 2663.2755        | -9.10       | 1        | (8)        | 6.2       | 1        | K.AGAYDFPSPEWDTVTPEAKDLINK.M    |
| <a href="#">698</a> | 888.7581        | 2663.2525        | 2663.2755        | -8.65       | 1        | (5)        | 14        | 1        | K.AGAYDFPSPEWDTVTPEAKDLINK.M    |
| <a href="#">699</a> | 888.7607        | 2663.2603        | 2663.2755        | -5.72       | 1        | (22)       | 0.24      | 1        | K.AGAYDFPSPEWDTVTPEAKDLINK.M    |
| <a href="#">701</a> | 888.7623        | 2663.2651        | 2663.2755        | -3.91       | 1        | (8)        | 7.1       | 1        | K.AGAYDFPSPEWDTVTPEAKDLINK.M    |
| <a href="#">703</a> | 888.7635        | 2663.2687        | 2663.2755        | -2.56       | 1        | 37         | 0.0079    | 1        | K.AGAYDFPSPEWDTVTPEAKDLINK.M    |

Proteins matching the same set of peptides:

[IPI00621806](#) Mass: 54651 Score: 1121 Queries matched: 76  
Tax\_Id=10090 Gene\_Symbol=Camk2a Isoform Alpha CaMKII of Calcium/calmodulin-dependent protein kinase type II subunit alpha

2. [IPI00474502](#) Mass: 61164 Score: 595 Queries matched: 38 emPAI: 0.52  
Tax\_Id=10090 Gene\_Symbol=Camk2b Calcium/calmodulin-dependent protein kinase type II subunit beta

Check to include this hit in error tolerant search or archive report

| Query                                                   | Observed  | Mr(expt)  | Mr(calc)  | ppm    | Miss | Score | Expect   | Rank | Peptide                                      |
|---------------------------------------------------------|-----------|-----------|-----------|--------|------|-------|----------|------|----------------------------------------------|
| <a href="#">27</a>                                      | 588.3868  | 587.3795  | 587.3642  | 26.0   | 0    | 22    | 0.71     | 1    | K.IINTK.K                                    |
| <input checked="" type="checkbox"/> <a href="#">193</a> | 572.8034  | 1143.5922 | 1143.5964 | -3.65  | 0    | (13)  | 4.4      | 1    | R.FYFENLLAK.N                                |
| <input checked="" type="checkbox"/> <a href="#">194</a> | 572.8046  | 1143.5946 | 1143.5964 | -1.55  | 0    | (19)  | 1        | 1    | R.FYFENLLAK.N                                |
| <input checked="" type="checkbox"/> <a href="#">196</a> | 572.8075  | 1143.6004 | 1143.5964 | 3.52   | 0    | 22    | 0.51     | 1    | R.FYFENLLAK.N                                |
| <input checked="" type="checkbox"/> <a href="#">197</a> | 572.8082  | 1143.6018 | 1143.5964 | 4.75   | 0    | (12)  | 4.9      | 1    | R.FYFENLLAK.N                                |
| <a href="#">198</a>                                     | 572.8111  | 1143.6076 | 1143.5964 | 9.82   | 0    | (4)   | 32       | 2    | R.FYFENLLAK.N                                |
| <a href="#">201</a>                                     | 574.3237  | 1146.6328 | 1146.6431 | -8.91  | 0    | (39)  | 0.0079   | 1    | K.GALLTTLMLATR.N                             |
| <a href="#">202</a>                                     | 574.3245  | 1146.6344 | 1146.6431 | -7.52  | 0    | (51)  | 0.00057  | 1    | K.GALLTTLMLATR.N                             |
| <a href="#">204</a>                                     | 574.3274  | 1146.6402 | 1146.6431 | -2.46  | 0    | (36)  | 0.014    | 1    | K.GALLTTLMLATR.N                             |
| <a href="#">205</a>                                     | 574.3279  | 1146.6412 | 1146.6431 | -1.59  | 0    | (49)  | 0.00074  | 1    | K.GALLTTLMLATR.N                             |
| <a href="#">206</a>                                     | 574.3290  | 1146.6434 | 1146.6431 | 0.33   | 0    | (24)  | 0.21     | 1    | K.GALLTTLMLATR.N                             |
| <a href="#">207</a>                                     | 574.3298  | 1146.6450 | 1146.6431 | 1.73   | 0    | 63    | 2.6e-005 | 1    | K.GALLTTLMLATR.N                             |
| <a href="#">216</a>                                     | 582.3226  | 1162.6306 | 1162.6380 | -6.31  | 0    | (28)  | 0.097    | 1    | K.GALLTTLMLATR.N + Oxidation (M)             |
| <input checked="" type="checkbox"/> <a href="#">372</a> | 735.4076  | 1468.8006 | 1468.8071 | -4.42  | 0    | (18)  | 0.75     | 1    | K.NLINQMLTINPAK.R                            |
| <input checked="" type="checkbox"/> <a href="#">373</a> | 735.4100  | 1468.8054 | 1468.8071 | -1.15  | 0    | (63)  | 2.7e-005 | 1    | K.NLINQMLTINPAK.R                            |
| <input checked="" type="checkbox"/> <a href="#">374</a> | 735.4109  | 1468.8072 | 1468.8071 | 0.07   | 0    | 75    | 1.7e-006 | 1    | K.NLINQMLTINPAK.R                            |
| <input checked="" type="checkbox"/> <a href="#">375</a> | 735.4146  | 1468.8146 | 1468.8071 | 5.11   | 0    | (62)  | 3.1e-005 | 1    | K.NLINQMLTINPAK.R                            |
| <input checked="" type="checkbox"/> <a href="#">376</a> | 735.4150  | 1468.8154 | 1468.8071 | 5.65   | 0    | (71)  | 3.6e-006 | 1    | K.NLINQMLTINPAK.R                            |
| <input checked="" type="checkbox"/> <a href="#">480</a> | 810.8856  | 1619.7566 | 1619.7355 | 13.1   | 0    | (4)   | 26       | 1    | R.FTDEYQLYEDIGK.G                            |
| <input checked="" type="checkbox"/> <a href="#">481</a> | 810.8877  | 1619.7608 | 1619.7355 | 15.6   | 0    | 8     | 9.3      | 1    | R.FTDEYQLYEDIGK.G                            |
| <input checked="" type="checkbox"/> <a href="#">632</a> | 656.9538  | 1967.8396 | 1967.8556 | -8.12  | 1    | 52    | 0.00014  | 1    | K.ESSDSTNTTIEDEDAKAR.K                       |
| <a href="#">646</a>                                     | 694.3165  | 2079.9277 | 2079.9426 | -7.15  | 0    | (51)  | 0.0003   | 1    | K.AGAYDFPSPWDVTPEAK.N                        |
| <a href="#">647</a>                                     | 694.3185  | 2079.9337 | 2079.9426 | -4.27  | 0    | (60)  | 3.8e-005 | 1    | K.AGAYDFPSPWDVTPEAK.N                        |
| <a href="#">648</a>                                     | 1040.9807 | 2079.9468 | 2079.9426 | 2.07   | 0    | (60)  | 4.5e-005 | 1    | K.AGAYDFPSPWDVTPEAK.N                        |
| <a href="#">649</a>                                     | 1040.9808 | 2079.9470 | 2079.9426 | 2.16   | 0    | (43)  | 0.0021   | 1    | K.AGAYDFPSPWDVTPEAK.N                        |
| <a href="#">650</a>                                     | 1040.9817 | 2079.9488 | 2079.9426 | 3.03   | 0    | (53)  | 0.0002   | 1    | K.AGAYDFPSPWDVTPEAK.N                        |
| <a href="#">651</a>                                     | 1040.9820 | 2079.9494 | 2079.9426 | 3.32   | 0    | (56)  | 0.00011  | 1    | K.AGAYDFPSPWDVTPEAK.N                        |
| <a href="#">652</a>                                     | 1040.9820 | 2079.9494 | 2079.9426 | 3.32   | 0    | (50)  | 0.00046  | 1    | K.AGAYDFPSPWDVTPEAK.N                        |
| <a href="#">653</a>                                     | 1040.9828 | 2079.9510 | 2079.9426 | 4.09   | 0    | (45)  | 0.0013   | 1    | K.AGAYDFPSPWDVTPEAK.N                        |
| <a href="#">654</a>                                     | 1040.9838 | 2079.9530 | 2079.9426 | 5.05   | 0    | 74    | 1.9e-006 | 1    | K.AGAYDFPSPWDVTPEAK.N                        |
| <a href="#">655</a>                                     | 1040.9847 | 2079.9548 | 2079.9426 | 5.91   | 0    | (34)  | 0.019    | 1    | K.AGAYDFPSPWDVTPEAK.N                        |
| <input checked="" type="checkbox"/> <a href="#">676</a> | 785.0440  | 2352.1102 | 2352.1301 | -8.48  | 0    | (91)  | 3.4e-008 | 1    | R.QTTAPATMSTAASGTTMGLVEQAK.S                 |
| <input checked="" type="checkbox"/> <a href="#">677</a> | 785.0472  | 2352.1198 | 2352.1301 | -4.40  | 0    | (90)  | 3.9e-008 | 1    | R.QTTAPATMSTAASGTTMGLVEQAK.S                 |
| <input checked="" type="checkbox"/> <a href="#">678</a> | 1177.0771 | 2352.1396 | 2352.1301 | 4.05   | 0    | (32)  | 0.025    | 1    | R.QTTAPATMSTAASGTTMGLVEQAK.S                 |
| <input checked="" type="checkbox"/> <a href="#">679</a> | 1177.0814 | 2352.1482 | 2352.1301 | 7.71   | 0    | 91    | 3.4e-008 | 1    | R.QTTAPATMSTAASGTTMGLVEQAK.S                 |
| <input checked="" type="checkbox"/> <a href="#">681</a> | 785.4148  | 2353.2226 | 2353.2642 | -17.67 | 0    | (13)  | 1.9      | 1    | K.GSLPPAALEPQTTVIHNPVDGIK.E                  |
| <input checked="" type="checkbox"/> <a href="#">682</a> | 785.4241  | 2353.2505 | 2353.2642 | -5.82  | 0    | 14    | 1.5      | 1    | K.GSLPPAALEPQTTVIHNPVDGIK.E                  |
| <input checked="" type="checkbox"/> <a href="#">685</a> | 790.3805  | 2368.1197 | 2368.1250 | -2.26  | 0    | (42)  | 0.0024   | 1    | R.QTTAPATMSTAASGTTMGLVEQAK.S + Oxidation (M) |

Proteins matching the same set of peptides:

[IPI00875723](#) Mass: 68686 Score: 595 Queries matched: 38  
Tax\_Id=10090 Gene\_Symbol=Camk2b 68 kDa protein

3. [IPI00109073](#) Mass: 50010 Score: 415 Queries matched: 22 emPAI: 0.38

Tax\_Id=10090 Gene\_Symbol=Tubb4 Tubulin beta-4 chain

Check to include this hit in error tolerant search or archive report

| Query                                                   | Observed | Mr(expt)  | Mr(calc)  | ppm   | Miss | Score | Expect   | Rank | Peptide                              |
|---------------------------------------------------------|----------|-----------|-----------|-------|------|-------|----------|------|--------------------------------------|
| <input checked="" type="checkbox"/> <a href="#">191</a> | 572.3217 | 1142.6288 | 1142.6270 | 1.59  | 0    | 69    | 1.1e-005 | 1    | K.LAVNMVPPFR.L                       |
| <input checked="" type="checkbox"/> <a href="#">192</a> | 572.3229 | 1142.6312 | 1142.6270 | 3.69  | 0    | (38)  | 0.013    | 1    | K.LAVNMVPPFR.L                       |
| <input checked="" type="checkbox"/> <a href="#">308</a> | 660.3503 | 1318.6860 | 1318.6955 | -7.18 | 0    | (63)  | 4.2e-005 | 1    | R.IMNTFSVVPSPK.V                     |
| <input checked="" type="checkbox"/> <a href="#">309</a> | 660.3552 | 1318.6958 | 1318.6955 | 0.26  | 0    | (32)  | 0.048    | 1    | R.IMNTFSVVPSPK.V                     |
| <input checked="" type="checkbox"/> <a href="#">310</a> | 660.3563 | 1318.6980 | 1318.6955 | 1.92  | 0    | (71)  | 6.3e-006 | 1    | R.IMNTFSVVPSPK.V                     |
| <input checked="" type="checkbox"/> <a href="#">311</a> | 660.3572 | 1318.6998 | 1318.6955 | 3.29  | 0    | 104   | 2.8e-009 | 1    | R.IMNTFSVVPSPK.V                     |
| <input checked="" type="checkbox"/> <a href="#">454</a> | 801.4125 | 1600.8104 | 1600.8131 | -1.63 | 0    | (65)  | 2.2e-005 | 1    | R.AVLVDLEPGTMSVR.S                   |
| <input checked="" type="checkbox"/> <a href="#">455</a> | 801.4150 | 1600.8154 | 1600.8131 | 1.49  | 0    | 79    | 8.4e-007 | 1    | R.AVLVDLEPGTMSVR.S                   |
| <input checked="" type="checkbox"/> <a href="#">456</a> | 801.4152 | 1600.8158 | 1600.8131 | 1.74  | 0    | (59)  | 8.6e-005 | 1    | R.AVLVDLEPGTMSVR.S                   |
| <input checked="" type="checkbox"/> <a href="#">457</a> | 801.4156 | 1600.8166 | 1600.8131 | 2.24  | 0    | (60)  | 6.8e-005 | 1    | R.AVLVDLEPGTMSVR.S                   |
| <input checked="" type="checkbox"/> <a href="#">458</a> | 801.4175 | 1600.8204 | 1600.8131 | 4.61  | 0    | (65)  | 1.8e-005 | 1    | R.AVLVDLEPGTMSVR.S                   |
| <input checked="" type="checkbox"/> <a href="#">475</a> | 809.4103 | 1616.8060 | 1616.8080 | -1.20 | 0    | (36)  | 0.017    | 1    | R.AVLVDLEPGTMSVR.S + Oxidation (M)   |
| <input checked="" type="checkbox"/> <a href="#">521</a> | 846.4363 | 1690.8580 | 1690.8600 | -1.16 | 0    | (13)  | 3.3      | 2    | R.ALTVPPELTQQMFDAK.N                 |
| <input checked="" type="checkbox"/> <a href="#">522</a> | 846.4375 | 1690.8604 | 1690.8600 | 0.26  | 0    | (34)  | 0.027    | 1    | R.ALTVPPELTQQMFDAK.N                 |
| <input checked="" type="checkbox"/> <a href="#">523</a> | 846.4381 | 1690.8616 | 1690.8600 | 0.97  | 0    | (28)  | 0.099    | 1    | R.ALTVPPELTQQMFDAK.N                 |
| <input checked="" type="checkbox"/> <a href="#">524</a> | 846.4382 | 1690.8618 | 1690.8600 | 1.09  | 0    | 53    | 0.00034  | 1    | R.ALTVPPELTQQMFDAK.N                 |
| <input checked="" type="checkbox"/> <a href="#">526</a> | 848.9185 | 1695.8224 | 1695.8257 | -1.89 | 0    | 12    | 3.8      | 1    | K.NSSYFVEWIPNNVK.T                   |
| <input checked="" type="checkbox"/> <a href="#">558</a> | 854.4335 | 1706.8524 | 1706.8549 | -1.45 | 0    | (28)  | 0.11     | 2    | R.ALTVPPELTQQMFDAK.N + Oxidation (M) |
| <input checked="" type="checkbox"/> <a href="#">560</a> | 854.4359 | 1706.8572 | 1706.8549 | 1.36  | 0    | (16)  | 1.5      | 2    | R.ALTVPPELTQQMFDAK.N + Oxidation (M) |
| <input checked="" type="checkbox"/> <a href="#">601</a> | 915.4471 | 1828.8796 | 1828.8744 | 2.87  | 0    | 65    | 2e-005   | 1    | R.INVYYNEATGGNYVPR.A                 |
| <input checked="" type="checkbox"/> <a href="#">602</a> | 915.4512 | 1828.8878 | 1828.8744 | 7.36  | 0    | (41)  | 0.0042   | 1    | R.INVYYNEATGGNYVPR.A                 |
| <input checked="" type="checkbox"/> <a href="#">603</a> | 915.4561 | 1828.8976 | 1828.8744 | 12.7  | 0    | (5)   | 18       | 4    | R.INVYYNEATGGNYVPR.A                 |

4. [IPI00169463](#) Mass: 50255 Score: 404 Queries matched: 20 emPAI: 0.37

Tax\_Id=10090 Gene\_Symbol=Tubb2c Tubulin beta-2C chain

Check to include this hit in error tolerant search or archive report

Query Observed Mr(expt) Mr(calc) ppm Miss Score Expect Rank Peptide

|                                     |                     |                 |                  |                  |             |          |           |                 |                                     |                         |
|-------------------------------------|---------------------|-----------------|------------------|------------------|-------------|----------|-----------|-----------------|-------------------------------------|-------------------------|
| <a href="#">191</a>                 | 572.3217            | 1142.6288       | 1142.6270        | 1.59             | 0           | 69       | 1.1e-005  | 1               | K.LAVNMVFPFR.L                      |                         |
| <a href="#">192</a>                 | 572.3229            | 1142.6312       | 1142.6270        | 3.69             | 0           | (38)     | 0.013     | 1               | K.LAVNMVFPFR.L                      |                         |
| <a href="#">308</a>                 | 660.3503            | 1318.6860       | 1318.6955        | -7.18            | 0           | (63)     | 4.2e-005  | 1               | R.IMNTFVVVSPK.V                     |                         |
| <a href="#">309</a>                 | 660.3552            | 1318.6958       | 1318.6955        | 0.26             | 0           | (32)     | 0.048     | 1               | R.IMNTFVVVSPK.V                     |                         |
| <a href="#">310</a>                 | 660.3563            | 1318.6980       | 1318.6955        | 1.92             | 0           | (71)     | 6.3e-006  | 1               | R.IMNTFVVVSPK.V                     |                         |
| <a href="#">311</a>                 | 660.3572            | 1318.6998       | 1318.6955        | 3.29             | 0           | 104      | 2.8e-009  | 1               | R.IMNTFVVVSPK.V                     |                         |
| <input checked="" type="checkbox"/> | <a href="#">363</a> | <b>723.8521</b> | <b>1445.6896</b> | <b>1445.6820</b> | <b>5.28</b> | <b>0</b> | <b>61</b> | <b>5.4e-005</b> | <b>1</b>                            | <b>K.EVDEQMLNVQNK.N</b> |
| <a href="#">454</a>                 | 801.4125            | 1600.8104       | 1600.8131        | -1.63            | 0           | (65)     | 2.2e-005  | 1               | R.AVLVDLEPGTMSVR.S                  |                         |
| <a href="#">455</a>                 | 801.4150            | 1600.8154       | 1600.8131        | 1.49             | 0           | 79       | 8.4e-007  | 1               | R.AVLVDLEPGTMSVR.S                  |                         |
| <a href="#">456</a>                 | 801.4152            | 1600.8158       | 1600.8131        | 1.74             | 0           | (59)     | 8.6e-005  | 1               | R.AVLVDLEPGTMSVR.S                  |                         |
| <a href="#">457</a>                 | 801.4156            | 1600.8166       | 1600.8131        | 2.24             | 0           | (60)     | 6.8e-005  | 1               | R.AVLVDLEPGTMSVR.S                  |                         |
| <a href="#">458</a>                 | 801.4175            | 1600.8204       | 1600.8131        | 4.61             | 0           | (65)     | 1.8e-005  | 1               | R.AVLVDLEPGTMSVR.S                  |                         |
| <a href="#">475</a>                 | 809.4103            | 1616.8060       | 1616.8080        | -1.20            | 0           | (36)     | 0.017     | 1               | R.AVLVDLEPGTMSVR.S + Oxidation (M)  |                         |
| <a href="#">521</a>                 | 846.4363            | 1690.8580       | 1690.8600        | -1.16            | 0           | (13)     | 3.3       | 2               | R.ALTVPELTQQMFDAK.N                 |                         |
| <a href="#">522</a>                 | 846.4375            | 1690.8604       | 1690.8600        | 0.26             | 0           | (34)     | 0.027     | 1               | R.ALTVPELTQQMFDAK.N                 |                         |
| <a href="#">523</a>                 | 846.4381            | 1690.8616       | 1690.8600        | 0.97             | 0           | (28)     | 0.099     | 1               | R.ALTVPELTQQMFDAK.N                 |                         |
| <a href="#">524</a>                 | 846.4382            | 1690.8618       | 1690.8600        | 1.09             | 0           | 53       | 0.00034   | 1               | R.ALTVPELTQQMFDAK.N                 |                         |
| <a href="#">526</a>                 | 848.9185            | 1695.8224       | 1695.8257        | -1.89            | 0           | 12       | 3.8       | 1               | K.NSSYFVWIPNVK.T                    |                         |
| <a href="#">558</a>                 | 854.4335            | 1706.8524       | 1706.8549        | -1.45            | 0           | (28)     | 0.11      | 2               | R.ALTVPELTQQMFDAK.N + Oxidation (M) |                         |
| <a href="#">560</a>                 | 854.4359            | 1706.8572       | 1706.8549        | 1.36             | 0           | (16)     | 1.5       | 2               | R.ALTVPELTQQMFDAK.N + Oxidation (M) |                         |

5. [IPI00124695](#) Mass: 60254 Score: 386 Queries matched: 19 emPAI: 0.24  
Tax\_Id=10090 Gene\_Symbol=Camk2g Isoform 1 of Calcium/calmodulin-dependent protein kinase type II subunit gamma  
 Check to include this hit in error tolerant search or archive report

| Query                               | Observed            | Mr(expt)        | Mr(calc)         | ppm              | Miss        | Score    | Expect      | Rank           | Peptide                 |                          |
|-------------------------------------|---------------------|-----------------|------------------|------------------|-------------|----------|-------------|----------------|-------------------------|--------------------------|
| <a href="#">27</a>                  | 588.3868            | 587.3795        | 587.3642         | 26.0             | 0           | 22       | 0.71        | 1              | K.IINTK.K               |                          |
| <a href="#">372</a>                 | 735.4076            | 1468.8006       | 1468.8071        | -4.42            | 0           | (18)     | 0.75        | 1              | K.NLINQMLTINPAK.R       |                          |
| <a href="#">373</a>                 | 735.4100            | 1468.8054       | 1468.8071        | -1.15            | 0           | (63)     | 2.7e-005    | 1              | K.NLINQMLTINPAK.R       |                          |
| <a href="#">374</a>                 | 735.4109            | 1468.8072       | 1468.8071        | 0.07             | 0           | 75       | 1.7e-006    | 1              | K.NLINQMLTINPAK.R       |                          |
| <a href="#">375</a>                 | 735.4146            | 1468.8146       | 1468.8071        | 5.11             | 0           | (62)     | 3.1e-005    | 1              | K.NLINQMLTINPAK.R       |                          |
| <a href="#">376</a>                 | 735.4150            | 1468.8154       | 1468.8071        | 5.65             | 0           | (71)     | 3.6e-006    | 1              | K.NLINQMLTINPAK.R       |                          |
| <input checked="" type="checkbox"/> | <a href="#">463</a> | <b>802.8795</b> | <b>1603.7444</b> | <b>1603.7406</b> | <b>2.40</b> | <b>0</b> | <b>51</b>   | <b>0.00037</b> | <b>1</b>                | <b>R.FTDDYQLFEELGK.G</b> |
| <input checked="" type="checkbox"/> | <a href="#">464</a> | <b>802.8842</b> | <b>1603.7538</b> | <b>1603.7406</b> | <b>8.26</b> | <b>0</b> | <b>(29)</b> | <b>0.074</b>   | <b>1</b>                | <b>R.FTDDYQLFEELGK.G</b> |
| <input checked="" type="checkbox"/> | <a href="#">465</a> | <b>802.8851</b> | <b>1603.7556</b> | <b>1603.7406</b> | <b>9.38</b> | <b>0</b> | <b>(37)</b> | <b>0.011</b>   | <b>1</b>                | <b>R.FTDDYQLFEELGK.G</b> |
| <a href="#">646</a>                 | 694.3165            | 2079.9277       | 2079.9426        | -7.15            | 0           | (51)     | 0.0003      | 1              | K.AGAYDFPSPEDWTVTPEAK.N |                          |
| <a href="#">647</a>                 | 694.3185            | 2079.9337       | 2079.9426        | -4.27            | 0           | (60)     | 3.8e-005    | 1              | K.AGAYDFPSPEDWTVTPEAK.N |                          |
| <a href="#">648</a>                 | 1040.9807           | 2079.9468       | 2079.9426        | 2.07             | 0           | (60)     | 4.5e-005    | 1              | K.AGAYDFPSPEDWTVTPEAK.N |                          |
| <a href="#">649</a>                 | 1040.9808           | 2079.9470       | 2079.9426        | 2.16             | 0           | (43)     | 0.0021      | 1              | K.AGAYDFPSPEDWTVTPEAK.N |                          |
| <a href="#">650</a>                 | 1040.9817           | 2079.9488       | 2079.9426        | 3.03             | 0           | (53)     | 0.0002      | 1              | K.AGAYDFPSPEDWTVTPEAK.N |                          |
| <a href="#">651</a>                 | 1040.9820           | 2079.9494       | 2079.9426        | 3.32             | 0           | (56)     | 0.00011     | 1              | K.AGAYDFPSPEDWTVTPEAK.N |                          |
| <a href="#">652</a>                 | 1040.9820           | 2079.9494       | 2079.9426        | 3.32             | 0           | (50)     | 0.00046     | 1              | K.AGAYDFPSPEDWTVTPEAK.N |                          |
| <a href="#">653</a>                 | 1040.9828           | 2079.9510       | 2079.9426        | 4.09             | 0           | (45)     | 0.0013      | 1              | K.AGAYDFPSPEDWTVTPEAK.N |                          |
| <a href="#">654</a>                 | 1040.9838           | 2079.9530       | 2079.9426        | 5.05             | 0           | 74       | 1.9e-006    | 1              | K.AGAYDFPSPEDWTVTPEAK.N |                          |
| <a href="#">655</a>                 | 1040.9847           | 2079.9548       | 2079.9426        | 5.91             | 0           | (34)     | 0.019       | 1              | K.AGAYDFPSPEDWTVTPEAK.N |                          |

Proteins matching the same set of peptides:

[IPI00228044](#) Mass: 59013 Score: 386 Queries matched: 19  
Tax\_Id=10090 Gene\_Symbol=Camk2g Isoform 2 of Calcium/calmodulin-dependent protein kinase type II subunit gamma  
[IPI00228045](#) Mass: 56610 Score: 386 Queries matched: 19  
Tax\_Id=10090 Gene\_Symbol=Camk2g Isoform 3 of Calcium/calmodulin-dependent protein kinase type II subunit gamma

6. [IPI00117352](#) Mass: 50095 Score: 381 Queries matched: 16 emPAI: 0.38  
Tax\_Id=10090 Gene\_Symbol=Tubb5 Tubulin beta-5 chain  
 Check to include this hit in error tolerant search or archive report

| Query                               | Observed            | Mr(expt)        | Mr(calc)         | ppm              | Miss         | Score    | Expect      | Rank            | Peptide          |                                           |
|-------------------------------------|---------------------|-----------------|------------------|------------------|--------------|----------|-------------|-----------------|------------------|-------------------------------------------|
| <a href="#">191</a>                 | 572.3217            | 1142.6288       | 1142.6270        | 1.59             | 0            | 69       | 1.1e-005    | 1               | K.LAVNMVFPFR.L   |                                           |
| <a href="#">192</a>                 | 572.3229            | 1142.6312       | 1142.6270        | 3.69             | 0            | (38)     | 0.013       | 1               | K.LAVNMVFPFR.L   |                                           |
| <a href="#">308</a>                 | 660.3503            | 1318.6860       | 1318.6955        | -7.18            | 0            | (63)     | 4.2e-005    | 1               | R.IMNTFVVVSPK.V  |                                           |
| <a href="#">309</a>                 | 660.3552            | 1318.6958       | 1318.6955        | 0.26             | 0            | (32)     | 0.048       | 1               | R.IMNTFVVVSPK.V  |                                           |
| <a href="#">310</a>                 | 660.3563            | 1318.6980       | 1318.6955        | 1.92             | 0            | (71)     | 6.3e-006    | 1               | R.IMNTFVVVSPK.V  |                                           |
| <a href="#">311</a>                 | 660.3572            | 1318.6998       | 1318.6955        | 3.29             | 0            | 104      | 2.8e-009    | 1               | R.IMNTFVVVSPK.V  |                                           |
| <a href="#">363</a>                 | 723.8521            | 1445.6896       | 1445.6820        | 5.28             | 0            | 61       | 5.4e-005    | 1               | K.EVDEQMLNVQNK.N |                                           |
| <input checked="" type="checkbox"/> | <a href="#">468</a> | <b>808.4218</b> | <b>1614.8290</b> | <b>1614.8287</b> | <b>0.21</b>  | <b>0</b> | <b>(36)</b> | <b>0.02</b>     | <b>1</b>         | <b>R.AILVDLEPGTMSVR.S</b>                 |
| <input checked="" type="checkbox"/> | <a href="#">469</a> | <b>808.4241</b> | <b>1614.8336</b> | <b>1614.8287</b> | <b>3.06</b>  | <b>0</b> | <b>(70)</b> | <b>7.9e-006</b> | <b>1</b>         | <b>R.AILVDLEPGTMSVR.S</b>                 |
| <input checked="" type="checkbox"/> | <a href="#">470</a> | <b>808.4243</b> | <b>1614.8340</b> | <b>1614.8287</b> | <b>3.31</b>  | <b>0</b> | <b>(60)</b> | <b>7.8e-005</b> | <b>1</b>         | <b>R.AILVDLEPGTMSVR.S</b>                 |
| <input checked="" type="checkbox"/> | <a href="#">471</a> | <b>808.4246</b> | <b>1614.8346</b> | <b>1614.8287</b> | <b>3.68</b>  | <b>0</b> | <b>70</b>   | <b>7.2e-006</b> | <b>1</b>         | <b>R.AILVDLEPGTMSVR.S</b>                 |
| <input checked="" type="checkbox"/> | <a href="#">489</a> | <b>816.4179</b> | <b>1630.8212</b> | <b>1630.8236</b> | <b>-1.46</b> | <b>0</b> | <b>(48)</b> | <b>0.0011</b>   | <b>1</b>         | <b>R.AILVDLEPGTMSVR.S + Oxidation (M)</b> |
| <input checked="" type="checkbox"/> | <a href="#">490</a> | <b>816.4210</b> | <b>1630.8274</b> | <b>1630.8236</b> | <b>2.34</b>  | <b>0</b> | <b>(54)</b> | <b>0.00032</b>  | <b>1</b>         | <b>R.AILVDLEPGTMSVR.S + Oxidation (M)</b> |
| <input checked="" type="checkbox"/> | <a href="#">518</a> | <b>830.4456</b> | <b>1658.8766</b> | <b>1658.8879</b> | <b>-6.81</b> | <b>0</b> | <b>(13)</b> | <b>2.7</b>      | <b>1</b>         | <b>R.ALTVPELTQQVFDK.N</b>                 |
| <input checked="" type="checkbox"/> | <a href="#">519</a> | <b>830.4520</b> | <b>1658.8894</b> | <b>1658.8879</b> | <b>0.91</b>  | <b>0</b> | <b>28</b>   | <b>0.085</b>    | <b>1</b>         | <b>R.ALTVPELTQQVFDK.N</b>                 |
| <a href="#">526</a>                 | 848.9185            | 1695.8224       | 1695.8257        | -1.89            | 0            | 12       | 3.8         | 1               | K.NSSYFVWIPNVK.T |                                           |

7. [IPI00109061](#) Mass: 50377 Score: 375 Queries matched: 16 emPAI: 0.46  
Tax\_Id=10090 Gene\_Symbol=Tubb2b Tubulin beta-2B chain  
 Check to include this hit in error tolerant search or archive report

| Query                               | Observed            | Mr(expt)        | Mr(calc)         | ppm              | Miss         | Score    | Expect      | Rank            | Peptide          |                        |
|-------------------------------------|---------------------|-----------------|------------------|------------------|--------------|----------|-------------|-----------------|------------------|------------------------|
| <a href="#">191</a>                 | 572.3217            | 1142.6288       | 1142.6270        | 1.59             | 0            | 69       | 1.1e-005    | 1               | K.LAVNMVFPFR.L   |                        |
| <a href="#">192</a>                 | 572.3229            | 1142.6312       | 1142.6270        | 3.69             | 0            | (38)     | 0.013       | 1               | K.LAVNMVFPFR.L   |                        |
| <input checked="" type="checkbox"/> | <a href="#">330</a> | <b>676.3404</b> | <b>1350.6662</b> | <b>1350.6676</b> | <b>-0.98</b> | <b>0</b> | <b>(65)</b> | <b>2.1e-005</b> | <b>1</b>         | <b>R.IMNTFVVVSPK.V</b> |
| <input checked="" type="checkbox"/> | <a href="#">331</a> | <b>676.3443</b> | <b>1350.6740</b> | <b>1350.6676</b> | <b>4.79</b>  | <b>0</b> | <b>82</b>   | <b>5.1e-007</b> | <b>1</b>         | <b>R.IMNTFVVVSPK.V</b> |
| <input checked="" type="checkbox"/> | <a href="#">332</a> | <b>676.3445</b> | <b>1350.6744</b> | <b>1350.6676</b> | <b>5.09</b>  | <b>0</b> | <b>(64)</b> | <b>3.2e-005</b> | <b>1</b>         | <b>R.IMNTFVVVSPK.V</b> |
| <a href="#">363</a>                 | 723.8521            | 1445.6896       | 1445.6820        | 5.28             | 0            | 61       | 5.4e-005    | 1               | K.EVDEQMLNVQNK.N |                        |

|                                                         |          |           |           |       |   |      |          |   |                                    |
|---------------------------------------------------------|----------|-----------|-----------|-------|---|------|----------|---|------------------------------------|
| <a href="#">468</a>                                     | 808.4218 | 1614.8290 | 1614.8287 | 0.21  | 0 | (36) | 0.02     | 1 | R.AILVDLEPGTMSVR.S                 |
| <a href="#">469</a>                                     | 808.4241 | 1614.8336 | 1614.8287 | 3.06  | 0 | (70) | 7.9e-006 | 1 | R.AILVDLEPGTMSVR.S                 |
| <a href="#">470</a>                                     | 808.4243 | 1614.8340 | 1614.8287 | 3.31  | 0 | (60) | 7.8e-005 | 1 | R.AILVDLEPGTMSVR.S                 |
| <a href="#">471</a>                                     | 808.4246 | 1614.8346 | 1614.8287 | 3.68  | 0 | 70   | 7.2e-006 | 1 | R.AILVDLEPGTMSVR.S                 |
| <a href="#">489</a>                                     | 816.4179 | 1630.8212 | 1630.8236 | -1.46 | 0 | (48) | 0.0011   | 1 | R.AILVDLEPGTMSVR.S + Oxidation (M) |
| <a href="#">490</a>                                     | 816.4210 | 1630.8274 | 1630.8236 | 2.34  | 0 | (54) | 0.00032  | 1 | R.AILVDLEPGTMSVR.S + Oxidation (M) |
| <a href="#">526</a>                                     | 848.9185 | 1695.8224 | 1695.8257 | -1.89 | 0 | 12   | 3.8      | 1 | K.NSSYFVEWIPNNVK.T                 |
| <input checked="" type="checkbox"/> <a href="#">558</a> | 854.4335 | 1706.8524 | 1706.8549 | -1.45 | 0 | 40   | 0.0068   | 1 | R.ALTVPELTQQMFDSK.N                |
| <input checked="" type="checkbox"/> <a href="#">559</a> | 854.4358 | 1706.8570 | 1706.8549 | 1.25  | 0 | (4)  | 27       | 1 | R.ALTVPELTQQMFDSK.N                |
| <input checked="" type="checkbox"/> <a href="#">560</a> | 854.4359 | 1706.8572 | 1706.8549 | 1.36  | 0 | (24) | 0.24     | 1 | R.ALTVPELTQQMFDSK.N                |

## Proteins matching the same set of peptides:

[IPI00338039](#) Mass: 50274 Score: 375 Queries matched: 16  
Tax\_id=10090 Gene\_Symbol=Tubb2a Tubulin beta-2A chain

8. [IPI00112251](#) Mass: 50842 Score: 372 Queries matched: 19 emPAI: 0.37

Tax\_id=10090 Gene\_Symbol=Tubb3 Tubulin beta-3 chain

Check to include this hit in error tolerant search or archive report

| Query               | Observed | Mr(expt)  | Mr(calc)  | ppm   | Miss | Score | Expect   | Rank | Peptide                             |
|---------------------|----------|-----------|-----------|-------|------|-------|----------|------|-------------------------------------|
| <a href="#">191</a> | 572.3217 | 1142.6288 | 1142.6270 | 1.59  | 0    | 69    | 1.1e-005 | 1    | K.LAVNMVPPFR.L                      |
| <a href="#">192</a> | 572.3229 | 1142.6312 | 1142.6270 | 3.69  | 0    | (38)  | 0.013    | 1    | K.LAVNMVPPFR.L                      |
| <a href="#">308</a> | 660.3503 | 1318.6860 | 1318.6955 | -7.18 | 0    | (63)  | 4.2e-005 | 1    | R.IMNTFVVVSPK.V                     |
| <a href="#">309</a> | 660.3552 | 1318.6958 | 1318.6955 | 0.26  | 0    | (32)  | 0.048    | 1    | R.IMNTFVVVSPK.V                     |
| <a href="#">310</a> | 660.3563 | 1318.6980 | 1318.6955 | 1.92  | 0    | (71)  | 6.3e-006 | 1    | R.IMNTFVVVSPK.V                     |
| <a href="#">311</a> | 660.3572 | 1318.6998 | 1318.6955 | 3.29  | 0    | 104   | 2.8e-009 | 1    | R.IMNTFVVVSPK.V                     |
| <a href="#">468</a> | 808.4218 | 1614.8290 | 1614.8287 | 0.21  | 0    | (36)  | 0.02     | 1    | R.AILVDLEPGTMSVR.S                  |
| <a href="#">469</a> | 808.4241 | 1614.8336 | 1614.8287 | 3.06  | 0    | (70)  | 7.9e-006 | 1    | R.AILVDLEPGTMSVR.S                  |
| <a href="#">470</a> | 808.4243 | 1614.8340 | 1614.8287 | 3.31  | 0    | (60)  | 7.8e-005 | 1    | R.AILVDLEPGTMSVR.S                  |
| <a href="#">471</a> | 808.4246 | 1614.8346 | 1614.8287 | 3.68  | 0    | 70    | 7.2e-006 | 1    | R.AILVDLEPGTMSVR.S                  |
| <a href="#">489</a> | 816.4179 | 1630.8212 | 1630.8236 | -1.46 | 0    | (48)  | 0.0011   | 1    | R.AILVDLEPGTMSVR.S + Oxidation (M)  |
| <a href="#">490</a> | 816.4210 | 1630.8274 | 1630.8236 | 2.34  | 0    | (54)  | 0.00032  | 1    | R.AILVDLEPGTMSVR.S + Oxidation (M)  |
| <a href="#">521</a> | 846.4363 | 1690.8580 | 1690.8600 | -1.16 | 0    | (13)  | 3.3      | 2    | R.ALTVPELTQQMFDAK.N                 |
| <a href="#">522</a> | 846.4375 | 1690.8604 | 1690.8600 | 0.26  | 0    | (34)  | 0.027    | 1    | R.ALTVPELTQQMFDAK.N                 |
| <a href="#">523</a> | 846.4381 | 1690.8616 | 1690.8600 | 0.97  | 0    | (28)  | 0.099    | 1    | R.ALTVPELTQQMFDAK.N                 |
| <a href="#">524</a> | 846.4382 | 1690.8618 | 1690.8600 | 1.09  | 0    | 53    | 0.00034  | 1    | R.ALTVPELTQQMFDAK.N                 |
| <a href="#">526</a> | 848.9185 | 1695.8224 | 1695.8257 | -1.89 | 0    | 12    | 3.8      | 1    | K.NSSYFVEWIPNNVK.V                  |
| <a href="#">558</a> | 854.4335 | 1706.8524 | 1706.8549 | -1.45 | 0    | (28)  | 0.11     | 2    | R.ALTVPELTQQMFDAK.N + Oxidation (M) |
| <a href="#">560</a> | 854.4359 | 1706.8572 | 1706.8549 | 1.36  | 0    | (16)  | 1.5      | 2    | R.ALTVPELTQQMFDAK.N + Oxidation (M) |

9. [IPI00755181](#) Mass: 57178 Score: 296 Queries matched: 11 emPAI: 0.32

Tax\_id=10090 Gene\_Symbol=Krt10 keratin, type I cytoskeletal 10

Check to include this hit in error tolerant search or archive report

| Query                                                   | Observed | Mr(expt)  | Mr(calc)  | ppm   | Miss | Score | Expect   | Rank | Peptide                       |
|---------------------------------------------------------|----------|-----------|-----------|-------|------|-------|----------|------|-------------------------------|
| <input checked="" type="checkbox"/> <a href="#">170</a> | 545.7681 | 1089.5216 | 1089.5237 | -1.87 | 0    | (65)  | 2.8e-005 | 1    | K.VTMQNLNDR.L                 |
| <input checked="" type="checkbox"/> <a href="#">171</a> | 545.7692 | 1089.5238 | 1089.5237 | 0.15  | 0    | 83    | 4.1e-007 | 1    | K.VTMQNLNDR.L                 |
| <input checked="" type="checkbox"/> <a href="#">175</a> | 553.7703 | 1105.5260 | 1105.5186 | 6.74  | 0    | (35)  | 0.029    | 1    | K.VTMQNLNDR.L + Oxidation (M) |
| <input checked="" type="checkbox"/> <a href="#">176</a> | 553.7716 | 1105.5286 | 1105.5186 | 9.09  | 0    | (50)  | 0.00085  | 1    | K.VTMQNLNDR.L + Oxidation (M) |
| <input checked="" type="checkbox"/> <a href="#">217</a> | 583.2936 | 1164.5726 | 1164.5775 | -4.14 | 0    | (36)  | 0.019    | 1    | R.LENEIQTYR.S                 |
| <input checked="" type="checkbox"/> <a href="#">218</a> | 583.2956 | 1164.5766 | 1164.5775 | -0.70 | 0    | 41    | 0.0064   | 1    | R.LENEIQTYR.S                 |
| <input checked="" type="checkbox"/> <a href="#">340</a> | 691.3282 | 1380.6418 | 1380.6408 | 0.73  | 0    | (52)  | 0.00037  | 1    | R.ALEESNYELEGK.I              |
| <input checked="" type="checkbox"/> <a href="#">341</a> | 691.3283 | 1380.6420 | 1380.6408 | 0.88  | 0    | (74)  | 2.5e-006 | 1    | R.ALEESNYELEGK.I              |
| <input checked="" type="checkbox"/> <a href="#">342</a> | 691.3298 | 1380.6450 | 1380.6408 | 3.05  | 0    | 87    | 1.1e-007 | 1    | R.ALEESNYELEGK.I              |
| <input checked="" type="checkbox"/> <a href="#">343</a> | 691.3315 | 1380.6484 | 1380.6408 | 5.51  | 0    | (55)  | 0.00017  | 1    | R.ALEESNYELEGK.I              |
| <input checked="" type="checkbox"/> <a href="#">353</a> | 695.8544 | 1389.6942 | 1389.6736 | 14.9  | 0    | 55    | 0.00024  | 1    | K.QSLEASLAETGR.Y              |

## Proteins matching the same set of peptides:

[IPI00798492](#) Mass: 57906 Score: 296 Queries matched: 11  
Tax\_id=10090 Gene\_Symbol=Krt10 Isoform 1 of Keratin, type I cytoskeletal 10

[IPI00828744](#) Mass: 57197 Score: 296 Queries matched: 11  
Tax\_id=10090 Gene\_Symbol=Krt10 Isoform 2 of Keratin, type I cytoskeletal 10

10. [IPI00110753](#) Mass: 50788 Score: 288 Queries matched: 21 emPAI: 0.06

Tax\_id=10090 Gene\_Symbol=Tubala Tubulin alpha-1A chain

Check to include this hit in error tolerant search or archive report

| Query                                                   | Observed | Mr(expt)  | Mr(calc)  | ppm   | Miss | Score | Expect   | Rank | Peptide             |
|---------------------------------------------------------|----------|-----------|-----------|-------|------|-------|----------|------|---------------------|
| <input checked="" type="checkbox"/> <a href="#">529</a> | 851.4498 | 1700.8850 | 1700.8985 | -7.92 | 0    | (1)   | 45       | 1    | R.AVFVDLEPTVIDEVR.T |
| <input checked="" type="checkbox"/> <a href="#">530</a> | 851.4507 | 1700.8868 | 1700.8985 | -6.86 | 0    | (58)  | 8.7e-005 | 1    | R.AVFVDLEPTVIDEVR.T |
| <input checked="" type="checkbox"/> <a href="#">532</a> | 851.4516 | 1700.8886 | 1700.8985 | -5.80 | 0    | (60)  | 6.1e-005 | 1    | R.AVFVDLEPTVIDEVR.T |
| <input checked="" type="checkbox"/> <a href="#">533</a> | 851.4528 | 1700.8910 | 1700.8985 | -4.39 | 0    | (70)  | 5.8e-006 | 1    | R.AVFVDLEPTVIDEVR.T |
| <input checked="" type="checkbox"/> <a href="#">534</a> | 851.4536 | 1700.8926 | 1700.8985 | -3.45 | 0    | (57)  | 0.00013  | 1    | R.AVFVDLEPTVIDEVR.T |
| <input checked="" type="checkbox"/> <a href="#">535</a> | 851.4545 | 1700.8944 | 1700.8985 | -2.39 | 0    | (1)   | 47       | 2    | R.AVFVDLEPTVIDEVR.T |
| <input checked="" type="checkbox"/> <a href="#">536</a> | 851.4548 | 1700.8950 | 1700.8985 | -2.04 | 0    | (40)  | 0.0052   | 1    | R.AVFVDLEPTVIDEVR.T |
| <input checked="" type="checkbox"/> <a href="#">537</a> | 851.4554 | 1700.8962 | 1700.8985 | -1.33 | 0    | (20)  | 0.6      | 1    | R.AVFVDLEPTVIDEVR.T |
| <input checked="" type="checkbox"/> <a href="#">539</a> | 851.4562 | 1700.8978 | 1700.8985 | -0.39 | 0    | (38)  | 0.0081   | 1    | R.AVFVDLEPTVIDEVR.T |
| <input checked="" type="checkbox"/> <a href="#">540</a> | 851.4565 | 1700.8984 | 1700.8985 | -0.04 | 0    | (21)  | 0.49     | 1    | R.AVFVDLEPTVIDEVR.T |
| <input checked="" type="checkbox"/> <a href="#">541</a> | 851.4575 | 1700.9004 | 1700.8985 | 1.14  | 0    | (44)  | 0.0021   | 1    | R.AVFVDLEPTVIDEVR.T |
| <input checked="" type="checkbox"/> <a href="#">542</a> | 851.4576 | 1700.9006 | 1700.8985 | 1.25  | 0    | (23)  | 0.3      | 1    | R.AVFVDLEPTVIDEVR.T |
| <input checked="" type="checkbox"/> <a href="#">543</a> | 851.4583 | 1700.9020 | 1700.8985 | 2.08  | 0    | (49)  | 0.00072  | 1    | R.AVFVDLEPTVIDEVR.T |
| <input checked="" type="checkbox"/> <a href="#">544</a> | 851.4584 | 1700.9022 | 1700.8985 | 2.20  | 0    | (5)   | 17       | 1    | R.AVFVDLEPTVIDEVR.T |
| <input checked="" type="checkbox"/> <a href="#">545</a> | 851.4591 | 1700.9036 | 1700.8985 | 3.02  | 0    | 77    | 1.1e-006 | 1    | R.AVFVDLEPTVIDEVR.T |
| <input checked="" type="checkbox"/> <a href="#">546</a> | 851.4612 | 1700.9078 | 1700.8985 | 5.49  | 0    | (22)  | 0.33     | 1    | R.AVFVDLEPTVIDEVR.T |

|                                     |                     |           |           |           |       |   |      |         |   |                          |
|-------------------------------------|---------------------|-----------|-----------|-----------|-------|---|------|---------|---|--------------------------|
| <input checked="" type="checkbox"/> | <a href="#">547</a> | 851.4636  | 1700.9126 | 1700.8985 | 8.31  | 0 | (56) | 0.00013 | 1 | R.AVFVDLEPTVIDEVR.T      |
| <input checked="" type="checkbox"/> | <a href="#">548</a> | 851.4642  | 1700.9138 | 1700.8985 | 9.02  | 0 | (46) | 0.0012  | 1 | R.AVFVDLEPTVIDEVR.T      |
| <input checked="" type="checkbox"/> | <a href="#">597</a> | 912.9963  | 1823.9780 | 1823.9782 | -0.06 | 0 | (12) | 2.8     | 1 | K.VGINYQPPTVPPGGDLAK.V   |
| <input checked="" type="checkbox"/> | <a href="#">598</a> | 912.9998  | 1823.9850 | 1823.9782 | 3.77  | 0 | 22   | 0.25    | 1 | K.VGINYQPPTVPPGGDLAK.V   |
| <input checked="" type="checkbox"/> | <a href="#">635</a> | 1004.4624 | 2006.9102 | 2006.8858 | 12.2  | 0 | 22   | 0.25    | 1 | K.TIGGGDDSFNTFFSETGAGK.H |

## Proteins matching the same set of peptides:

[IPI00117348](#) Mass: 50804 Score: 288 Queries matched: 21  
Tax\_Id=10090 Gene\_Symbol=Tubalb Tubulin alpha-1B chain  
[IPI00403810](#) Mass: 50562 Score: 288 Queries matched: 21  
Tax\_Id=10090 Gene\_Symbol=Tubalc Tubulin alpha-1C chain

11. [IPI00112584](#) Mass: 56961 Score: 284 Queries matched: 34 emPAI: 0.48  
Tax\_Id=10090 Gene\_Symbol=Camk2d Isoform 1 of Calcium/calmodulin-dependent protein kinase type II subunit delta

Check to include this hit in error tolerant search or archive report

| Query                               | Observed            | Mr(expt)  | Mr(calc)  | ppm       | Miss  | Score | Expect   | Rank   | Peptide                         |                   |
|-------------------------------------|---------------------|-----------|-----------|-----------|-------|-------|----------|--------|---------------------------------|-------------------|
| <a href="#">27</a>                  | 588.3868            | 587.3795  | 587.3642  | 26.0      | 0     | 22    | 0.71     | 1      | K.IINTK.K                       |                   |
| <a href="#">162</a>                 | 539.2801            | 1076.5456 | 1076.5502 | -4.23     | 0     | (1)   | 72       | 5      | K.IPTGQEYAAK.I                  |                   |
| <input checked="" type="checkbox"/> | <a href="#">163</a> | 539.2836  | 1076.5526 | 2.27      | 0     | 24    | 0.38     | 1      | K.IPTGQEYAAK.I                  |                   |
| <a href="#">164</a>                 | 539.2836            | 1076.5526 | 1076.5502 | 2.27      | 0     | (6)   | 21       | 2      | K.IPTGQEYAAK.I                  |                   |
| <input checked="" type="checkbox"/> | <a href="#">183</a> | 559.7768  | 1117.5390 | 1117.5444 | -4.78 | 0     | 35       | 0.025  | 1                               | R.FYFENALSK.S     |
| <input checked="" type="checkbox"/> | <a href="#">184</a> | 559.7831  | 1117.5516 | 1117.5444 | 6.50  | 0     | (11)     | 6.4    | 1                               | R.FYFENALSK.S     |
| <a href="#">201</a>                 | 574.3237            | 1146.6328 | 1146.6431 | -8.91     | 0     | (39)  | 0.0079   | 1      | K.GAILTTMLATR.N                 |                   |
| <a href="#">202</a>                 | 574.3245            | 1146.6344 | 1146.6431 | -7.52     | 0     | (51)  | 0.00057  | 1      | K.GAILTTMLATR.N                 |                   |
| <a href="#">204</a>                 | 574.3274            | 1146.6402 | 1146.6431 | -2.46     | 0     | (36)  | 0.014    | 1      | K.GAILTTMLATR.N                 |                   |
| <a href="#">205</a>                 | 574.3279            | 1146.6412 | 1146.6431 | -1.59     | 0     | (49)  | 0.00074  | 1      | K.GAILTTMLATR.N                 |                   |
| <a href="#">206</a>                 | 574.3290            | 1146.6434 | 1146.6431 | 0.33      | 0     | (24)  | 0.21     | 1      | K.GAILTTMLATR.N                 |                   |
| <a href="#">207</a>                 | 574.3298            | 1146.6450 | 1146.6431 | 1.73      | 0     | 63    | 2.6e-005 | 1      | K.GAILTTMLATR.N                 |                   |
| <a href="#">216</a>                 | 582.3226            | 1162.6306 | 1162.6380 | -6.31     | 0     | (28)  | 0.097    | 1      | K.GAILTTMLATR.N + Oxidation (M) |                   |
| <input checked="" type="checkbox"/> | <a href="#">312</a> | 664.3106  | 1326.6066 | 1326.5948 | 8.93  | 0     | 38       | 0.0084 | 1                               | R.LTQYMDGSGMPK.T  |
| <input checked="" type="checkbox"/> | <a href="#">313</a> | 664.3110  | 1326.6074 | 1326.5948 | 9.53  | 0     | (29)     | 0.071  | 1                               | R.LTQYMDGSGMPK.T  |
| <input checked="" type="checkbox"/> | <a href="#">476</a> | 809.8831  | 1617.7516 | 1617.7562 | -2.84 | 0     | (7)      | 11     | 1                               | R.FTDEYQLFEELGK.G |
| <input checked="" type="checkbox"/> | <a href="#">477</a> | 809.8839  | 1617.7532 | 1617.7562 | -1.85 | 0     | (36)     | 0.012  | 1                               | R.FTDEYQLFEELGK.G |
| <input checked="" type="checkbox"/> | <a href="#">478</a> | 809.8858  | 1617.7570 | 1617.7562 | 0.50  | 0     | 48       | 0.0009 | 1                               | R.FTDEYQLFEELGK.G |
| <a href="#">646</a>                 | 694.3165            | 2079.9277 | 2079.9426 | -7.15     | 0     | (51)  | 0.0003   | 1      | K.AGAYDFPSPWDVTPEAK.D           |                   |
| <a href="#">647</a>                 | 694.3185            | 2079.9337 | 2079.9426 | -4.27     | 0     | (60)  | 3.8e-005 | 1      | K.AGAYDFPSPWDVTPEAK.D           |                   |
| <a href="#">648</a>                 | 1040.9807           | 2079.9468 | 2079.9426 | 2.07      | 0     | (60)  | 4.5e-005 | 1      | K.AGAYDFPSPWDVTPEAK.D           |                   |
| <a href="#">649</a>                 | 1040.9808           | 2079.9470 | 2079.9426 | 2.16      | 0     | (43)  | 0.0021   | 1      | K.AGAYDFPSPWDVTPEAK.D           |                   |
| <a href="#">650</a>                 | 1040.9817           | 2079.9488 | 2079.9426 | 3.03      | 0     | (53)  | 0.0002   | 1      | K.AGAYDFPSPWDVTPEAK.D           |                   |
| <a href="#">651</a>                 | 1040.9820           | 2079.9494 | 2079.9426 | 3.32      | 0     | (56)  | 0.00011  | 1      | K.AGAYDFPSPWDVTPEAK.D           |                   |
| <a href="#">652</a>                 | 1040.9820           | 2079.9494 | 2079.9426 | 3.32      | 0     | (50)  | 0.00046  | 1      | K.AGAYDFPSPWDVTPEAK.D           |                   |
| <a href="#">653</a>                 | 1040.9828           | 2079.9510 | 2079.9426 | 4.09      | 0     | (45)  | 0.0013   | 1      | K.AGAYDFPSPWDVTPEAK.D           |                   |
| <a href="#">654</a>                 | 1040.9838           | 2079.9530 | 2079.9426 | 5.05      | 0     | 74    | 1.9e-006 | 1      | K.AGAYDFPSPWDVTPEAK.D           |                   |
| <a href="#">655</a>                 | 1040.9847           | 2079.9548 | 2079.9426 | 5.91      | 0     | (34)  | 0.019    | 1      | K.AGAYDFPSPWDVTPEAK.D           |                   |
| <a href="#">696</a>                 | 888.7555            | 2663.2447 | 2663.2755 | -11.57    | 1     | (27)  | 0.084    | 1      | K.AGAYDFPSPWDVTPEAKDLINK.M      |                   |
| <a href="#">697</a>                 | 888.7577            | 2663.2513 | 2663.2755 | -9.10     | 1     | (8)   | 6.2      | 1      | K.AGAYDFPSPWDVTPEAKDLINK.M      |                   |
| <a href="#">698</a>                 | 888.7581            | 2663.2525 | 2663.2755 | -8.65     | 1     | (5)   | 14       | 1      | K.AGAYDFPSPWDVTPEAKDLINK.M      |                   |
| <a href="#">699</a>                 | 888.7607            | 2663.2603 | 2663.2755 | -5.72     | 1     | (22)  | 0.24     | 1      | K.AGAYDFPSPWDVTPEAKDLINK.M      |                   |
| <a href="#">701</a>                 | 888.7623            | 2663.2651 | 2663.2755 | -3.91     | 1     | (8)   | 7.1      | 1      | K.AGAYDFPSPWDVTPEAKDLINK.M      |                   |
| <a href="#">703</a>                 | 888.7635            | 2663.2687 | 2663.2755 | -2.56     | 1     | 37    | 0.0079   | 1      | K.AGAYDFPSPWDVTPEAKDLINK.M      |                   |

## Proteins matching the same set of peptides:

[IPI00406790](#) Mass: 60593 Score: 284 Queries matched: 34  
Tax\_Id=10090 Gene\_Symbol=Camk2d Isoform 4 of Calcium/calmodulin-dependent protein kinase type II subunit delta  
[IPI00475044](#) Mass: 55899 Score: 284 Queries matched: 34  
Tax\_Id=10090 Gene\_Symbol=Camk2d Isoform 2 of Calcium/calmodulin-dependent protein kinase type II subunit delta  
[IPI00828919](#) Mass: 58492 Score: 284 Queries matched: 34  
Tax\_Id=10090 Gene\_Symbol=Camk2d Isoform 3 of Calcium/calmodulin-dependent protein kinase type II subunit delta  
[IPI00857865](#) Mass: 54664 Score: 284 Queries matched: 34  
Tax\_Id=10090 Gene\_Symbol=Camk2d Putative uncharacterized protein  
[IPI00858128](#) Mass: 58283 Score: 284 Queries matched: 34  
Tax\_Id=10090 Gene\_Symbol=Camk2d calcium/calmodulin-dependent protein kinase type II subunit delta isoform 1  
[IPI00858144](#) Mass: 55828 Score: 284 Queries matched: 34  
Tax\_Id=10090 Gene\_Symbol=Camk2d 55 kDa protein

12. [IPI00608020](#) Mass: 20817 Score: 247 Queries matched: 6 emPAI: 0.35

Tax\_Id=10090 Gene\_Symbol=Ftl1 ferritin light chain 1

Check to include this hit in error tolerant search or archive report

| Query                               | Observed            | Mr(expt) | Mr(calc)  | ppm       | Miss  | Score | Expect | Rank     | Peptide |                              |
|-------------------------------------|---------------------|----------|-----------|-----------|-------|-------|--------|----------|---------|------------------------------|
| <input checked="" type="checkbox"/> | <a href="#">125</a> | 517.7652 | 1033.5158 | 1033.5192 | -3.28 | 0     | (39)   | 0.012    | 1       | R.LLEFQNDR.G                 |
| <input checked="" type="checkbox"/> | <a href="#">126</a> | 517.7660 | 1033.5174 | 1033.5192 | -1.73 | 0     | (35)   | 0.033    | 1       | R.LLEFQNDR.G                 |
| <input checked="" type="checkbox"/> | <a href="#">128</a> | 517.7683 | 1033.5220 | 1033.5192 | 2.72  | 0     | 46     | 0.0026   | 1       | R.LLEFQNDR.G                 |
| <input checked="" type="checkbox"/> | <a href="#">686</a> | 791.7253 | 2372.1541 | 2372.1761 | -9.27 | 0     | (73)   | 2.1e-006 | 1       | R.VAGPQPAQTGAPQGSGLGEYLFER.L |
| <input checked="" type="checkbox"/> | <a href="#">687</a> | 791.7254 | 2372.1544 | 2372.1761 | -9.15 | 0     | 110    | 4.8e-010 | 1       | R.VAGPQPAQTGAPQGSGLGEYLFER.L |
| <input checked="" type="checkbox"/> | <a href="#">688</a> | 791.7254 | 2372.1544 | 2372.1761 | -9.15 | 0     | (92)   | 2.8e-008 | 1       | R.VAGPQPAQTGAPQGSGLGEYLFER.L |

## Proteins matching the same set of peptides:

[IPI00625129](#) Mass: 20783 Score: 247 Queries matched: 6  
Tax\_Id=10090 Gene\_Symbol=Ftl2 ferritin light chain 2  
[IPI00762203](#) Mass: 20847 Score: 247 Queries matched: 6  
Tax\_Id=10090 Gene\_Symbol=Ftl1 Ferritin light chain 1

13. [IPI00122928](#) Mass: 50514 Score: 219 Queries matched: 12 emPAI: 0.21

Tax\_Id=10090 Gene\_Symbol=Tubb6 Tubulin beta-6 chain

 Check to include this hit in error tolerant search or archive report

| Query               | Observed | Mr(expt)  | Mr(calc)  | ppm   | Miss | Score | Expect   | Rank | Peptide                             |
|---------------------|----------|-----------|-----------|-------|------|-------|----------|------|-------------------------------------|
| <a href="#">191</a> | 572.3217 | 1142.6288 | 1142.6270 | 1.59  | 0    | 69    | 1.1e-005 | 1    | K.LAVNMVFPFR.L                      |
| <a href="#">192</a> | 572.3229 | 1142.6312 | 1142.6270 | 3.69  | 0    | (38)  | 0.013    | 1    | K.LAVNMVFPFR.L                      |
| <a href="#">330</a> | 676.3404 | 1350.6662 | 1350.6676 | -0.98 | 0    | (65)  | 2.1e-005 | 1    | R.IMNTFVMPSPK.V                     |
| <a href="#">331</a> | 676.3443 | 1350.6740 | 1350.6676 | 4.79  | 0    | 82    | 5.1e-007 | 1    | R.IMNTFVMPSPK.V                     |
| <a href="#">332</a> | 676.3445 | 1350.6744 | 1350.6676 | 5.09  | 0    | (64)  | 3.2e-005 | 1    | R.IMNTFVMPSPK.V                     |
| <a href="#">521</a> | 846.4363 | 1690.8580 | 1690.8600 | -1.16 | 0    | (13)  | 3.3      | 2    | R.ALTVPELTQQMFDAK.N                 |
| <a href="#">522</a> | 846.4375 | 1690.8604 | 1690.8600 | 0.26  | 0    | (34)  | 0.027    | 1    | R.ALTVPELTQQMFDAK.N                 |
| <a href="#">523</a> | 846.4381 | 1690.8616 | 1690.8600 | 0.97  | 0    | (28)  | 0.099    | 1    | R.ALTVPELTQQMFDAK.N                 |
| <a href="#">524</a> | 846.4382 | 1690.8618 | 1690.8600 | 1.09  | 0    | 53    | 0.00034  | 1    | R.ALTVPELTQQMFDAK.N                 |
| <a href="#">526</a> | 848.9185 | 1695.8224 | 1695.8257 | -1.89 | 0    | 12    | 3.8      | 1    | K.NSSYFVWIPNVK.V                    |
| <a href="#">558</a> | 854.4335 | 1706.8524 | 1706.8549 | -1.45 | 0    | (28)  | 0.11     | 2    | R.ALTVPELTQQMFDAK.N + Oxidation (M) |
| <a href="#">560</a> | 854.4359 | 1706.8572 | 1706.8549 | 1.36  | 0    | (16)  | 1.5      | 2    | R.ALTVPELTQQMFDAK.N + Oxidation (M) |

14. [IPI00347110](#) Mass: 59502 Score: 208 Queries matched: 9 emPAI: 0.11

Tax\_Id=10090 Gene\_Symbol=Krt73 Keratin, type II cytoskeletal 73

 Check to include this hit in error tolerant search or archive report

| Query                                                   | Observed | Mr(expt)  | Mr(calc)  | ppm    | Miss | Score | Expect   | Rank | Peptide          |
|---------------------------------------------------------|----------|-----------|-----------|--------|------|-------|----------|------|------------------|
| <input checked="" type="checkbox"/> <a href="#">279</a> | 639.3514 | 1276.6882 | 1276.7027 | -11.29 | 0    | (9)   | 9.3      | 1    | K.LALDIEIATYR.K  |
| <input checked="" type="checkbox"/> <a href="#">280</a> | 639.3543 | 1276.6940 | 1276.7027 | -6.75  | 0    | (46)  | 0.0019   | 1    | K.LALDIEIATYR.K  |
| <input checked="" type="checkbox"/> <a href="#">281</a> | 639.3561 | 1276.6976 | 1276.7027 | -3.93  | 0    | (47)  | 0.0012   | 1    | K.LALDIEIATYR.K  |
| <input checked="" type="checkbox"/> <a href="#">282</a> | 639.3570 | 1276.6994 | 1276.7027 | -2.52  | 0    | 54    | 0.00024  | 1    | K.LALDIEIATYR.K  |
| <input checked="" type="checkbox"/> <a href="#">283</a> | 639.3654 | 1276.7162 | 1276.7027 | 10.6   | 0    | (28)  | 0.071    | 1    | K.LALDIEIATYR.K  |
| <input checked="" type="checkbox"/> <a href="#">395</a> | 738.3946 | 1474.7746 | 1474.7780 | -2.26  | 0    | (68)  | 9.4e-006 | 1    | R.FLEQQNQVLQTK.W |
| <input checked="" type="checkbox"/> <a href="#">396</a> | 738.3973 | 1474.7800 | 1474.7780 | 1.40   | 0    | 83    | 2.9e-007 | 1    | R.FLEQQNQVLQTK.W |
| <input checked="" type="checkbox"/> <a href="#">397</a> | 738.3979 | 1474.7812 | 1474.7780 | 2.21   | 0    | (66)  | 1.6e-005 | 1    | R.FLEQQNQVLQTK.W |
| <input checked="" type="checkbox"/> <a href="#">398</a> | 738.3981 | 1474.7816 | 1474.7780 | 2.48   | 0    | (43)  | 0.0036   | 1    | R.FLEQQNQVLQTK.W |

15. [IPI00122048](#) Mass: 113045 Score: 198 Queries matched: 8 emPAI: 0.12

Tax\_Id=10090 Gene\_Symbol=Atpla3 Sodium/potassium-transporting ATPase subunit alpha-3

 Check to include this hit in error tolerant search or archive report

| Query                                                   | Observed | Mr(expt)  | Mr(calc)  | ppm    | Miss | Score | Expect   | Rank | Peptide                 |
|---------------------------------------------------------|----------|-----------|-----------|--------|------|-------|----------|------|-------------------------|
| <input checked="" type="checkbox"/> <a href="#">246</a> | 618.8546 | 1235.6946 | 1235.6986 | -3.20  | 0    | (54)  | 0.00019  | 1    | R.LNIPVSVNPR.D          |
| <input checked="" type="checkbox"/> <a href="#">247</a> | 618.8594 | 1235.7042 | 1235.6986 | 4.56   | 0    | 66    | 9.5e-006 | 1    | R.LNIPVSVNPR.D          |
| <input checked="" type="checkbox"/> <a href="#">277</a> | 634.8717 | 1267.7288 | 1267.7071 | 17.2   | 0    | 33    | 0.021    | 1    | K.NMVPQALVIR.E          |
| <input checked="" type="checkbox"/> <a href="#">595</a> | 906.4749 | 1810.9352 | 1810.9425 | -4.01  | 0    | 60    | 6.4e-005 | 1    | R.QGAIVAVTGDGVNDSPALK.K |
| <input checked="" type="checkbox"/> <a href="#">596</a> | 906.4772 | 1810.9398 | 1810.9425 | -1.47  | 0    | (56)  | 0.00013  | 1    | R.QGAIVAVTGDGVNDSPALK.K |
| <input checked="" type="checkbox"/> <a href="#">600</a> | 915.4284 | 1828.8422 | 1828.9167 | -40.68 | 0    | (6)   | 12       | 7    | K.GVGIIEGNETVEDIAR.L    |
| <input checked="" type="checkbox"/> <a href="#">603</a> | 915.4561 | 1828.8976 | 1828.9167 | -10.39 | 0    | (52)  | 0.00038  | 1    | K.GVGIIEGNETVEDIAR.L    |
| <input checked="" type="checkbox"/> <a href="#">604</a> | 915.4638 | 1828.9130 | 1828.9167 | -1.97  | 0    | 70    | 6.2e-006 | 1    | K.GVGIIEGNETVEDIAR.L    |

Proteins matching the same set of peptides:

[IPI00420569](#) Mass: 113457 Score: 198 Queries matched: 8

Tax\_Id=10090 Gene\_Symbol=Atpla2 Sodium/potassium-transporting ATPase subunit alpha-2

[IPI00752412](#) Mass: 117548 Score: 198 Queries matched: 8

Tax\_Id=10090 Gene\_Symbol=Atpla3 ATPase, Na+/K+ transporting, alpha 3 polypeptide, isoform CRA\_c

[IPI00762871](#) Mass: 104717 Score: 198 Queries matched: 8

Tax\_Id=10090 Gene\_Symbol=Atpla2 Uncharacterized protein

16. [IPI00138892](#) Mass: 15004 Score: 187 Queries matched: 5 emPAI: 0.23

Tax\_Id=10090 Gene\_Symbol=Uba52 Ubiquitin-60S ribosomal protein L40

 Check to include this hit in error tolerant search or archive report

| Query                                                   | Observed | Mr(expt)  | Mr(calc)  | ppm   | Miss | Score | Expect   | Rank | Peptide              |
|---------------------------------------------------------|----------|-----------|-----------|-------|------|-------|----------|------|----------------------|
| <input checked="" type="checkbox"/> <a href="#">578</a> | 894.4645 | 1786.9144 | 1786.9200 | -3.11 | 0    | (9)   | 8.9      | 1    | K.TITLEVEPSDTIENVK.A |
| <input checked="" type="checkbox"/> <a href="#">579</a> | 894.4648 | 1786.9150 | 1786.9200 | -2.78 | 0    | (62)  | 4.5e-005 | 1    | K.TITLEVEPSDTIENVK.A |
| <input checked="" type="checkbox"/> <a href="#">580</a> | 894.4680 | 1786.9214 | 1786.9200 | 0.80  | 0    | (67)  | 1.2e-005 | 1    | K.TITLEVEPSDTIENVK.A |
| <input checked="" type="checkbox"/> <a href="#">581</a> | 894.4692 | 1786.9238 | 1786.9200 | 2.15  | 0    | (77)  | 1.4e-006 | 1    | K.TITLEVEPSDTIENVK.A |
| <input checked="" type="checkbox"/> <a href="#">582</a> | 894.4696 | 1786.9246 | 1786.9200 | 2.59  | 0    | 80    | 6e-007   | 1    | K.TITLEVEPSDTIENVK.A |

Proteins matching the same set of peptides:

[IPI00470152](#) Mass: 18282 Score: 187 Queries matched: 5

Tax\_Id=10090 Gene\_Symbol=Rps27a Ubiquitin-40S ribosomal protein S27a

[IPI00895319](#) Mass: 22277 Score: 187 Queries matched: 5

Tax\_Id=10090 Gene\_Symbol=2810422J05Rik 22 kDa protein

[IPI00895479](#) Mass: 27181 Score: 187 Queries matched: 5

Tax\_Id=10090 Gene\_Symbol=2810422J05Rik 27 kDa protein

[IPI00918763](#) Mass: 11021 Score: 187 Queries matched: 5

Tax\_Id=10090 Gene\_Symbol=Uba52 Ubiquitin subunit 1

[IPI00750889](#) Mass: 22822 Score: 187 Queries matched: 5

Tax\_Id=10090 Gene\_Symbol=Ubc Ubc protein

[IPI00923013](#) Mass: 26603 Score: 187 Queries matched: 5

Tax\_Id=10090 Gene\_Symbol=Ubb Ubiquitin B

[IPI00923037](#) Mass: 22578 Score: 187 Queries matched: 5

Tax\_Id=10090 Gene\_Symbol=Ubc Putative uncharacterized protein

[IPI00139518](#) Mass: 34348 Score: 187 Queries matched: 5

Tax\_Id=10090 Gene\_Symbol=Ubb Polyubiquitin-B

[IPI00755916](#) Mass: 82614 Score: 187 Queries matched: 5

Tax\_Id=10090 Gene\_Symbol=Ubc ubiquitin  
[IPI00969323](#) Mass: 82603 Score: 187 Queries matched: 5  
 Tax\_Id=10090 Gene\_Symbol=Ubc Polyubiquitin-C

17. [IPI00625729](#) Mass: 66079 Score: 175 Queries matched: 5 emPAI: 0.10  
 Tax\_Id=10090 Gene\_Symbol=Krt1 Keratin, type II cytoskeletal 1

Check to include this hit in error tolerant search or archive report

| Query                                                   | Observed | Mr(expt)  | Mr(calc)  | ppm   | Miss | Score | Expect   | Rank | Peptide          |
|---------------------------------------------------------|----------|-----------|-----------|-------|------|-------|----------|------|------------------|
| <input checked="" type="checkbox"/> <a href="#">273</a> | 633.3264 | 1264.6382 | 1264.6299 | 6.59  | 0    | 44    | 0.003    | 1    | R.TNAENEFVTIK.K  |
| <input checked="" type="checkbox"/> <a href="#">395</a> | 738.3946 | 1474.7746 | 1474.7780 | -2.26 | 0    | (68)  | 9.4e-006 | 1    | R.FLEQQNQVLQTK.W |
| <input checked="" type="checkbox"/> <a href="#">396</a> | 738.3973 | 1474.7800 | 1474.7780 | 1.40  | 0    | 83    | 2.9e-007 | 1    | R.FLEQQNQVLQTK.W |
| <input checked="" type="checkbox"/> <a href="#">397</a> | 738.3979 | 1474.7812 | 1474.7780 | 2.21  | 0    | (66)  | 1.6e-005 | 1    | R.FLEQQNQVLQTK.W |
| <input checked="" type="checkbox"/> <a href="#">398</a> | 738.3981 | 1474.7816 | 1474.7780 | 2.48  | 0    | (43)  | 0.0036   | 1    | R.FLEQQNQVLQTK.W |

18. [IPI00136703](#) Mass: 42971 Score: 160 Queries matched: 5 emPAI: 0.08  
 Tax\_Id=10090 Gene\_Symbol=Ckb Creatine kinase B-type

Check to include this hit in error tolerant search or archive report

| Query                                                   | Observed | Mr(expt)  | Mr(calc)  | ppm    | Miss | Score | Expect   | Rank | Peptide             |
|---------------------------------------------------------|----------|-----------|-----------|--------|------|-------|----------|------|---------------------|
| <input checked="" type="checkbox"/> <a href="#">302</a> | 652.3596 | 1302.7046 | 1302.7183 | -10.50 | 0    | (72)  | 4.6e-006 | 1    | K.VLTPELYAELR.A     |
| <input checked="" type="checkbox"/> <a href="#">303</a> | 652.3610 | 1302.7074 | 1302.7183 | -8.35  | 0    | (58)  | 0.00011  | 1    | K.VLTPELYAELR.A     |
| <input checked="" type="checkbox"/> <a href="#">304</a> | 652.3613 | 1302.7080 | 1302.7183 | -7.89  | 0    | 90    | 6e-008   | 1    | K.VLTPELYAELR.A     |
| <input checked="" type="checkbox"/> <a href="#">462</a> | 801.9241 | 1601.8336 | 1601.8260 | 4.74   | 0    | 20    | 0.73     | 1    | K.LAVEALSSLDGDLGR.V |
| <input checked="" type="checkbox"/> <a href="#">517</a> | 828.9160 | 1655.8174 | 1655.8188 | -0.85  | 0    | 3     |          | 29   | R.LEQQQAIDDLMPAQK.- |

19. [IPI00110850](#) Mass: 42052 Score: 157 Queries matched: 11 emPAI: 0.35  
 Tax\_Id=10090 Gene\_Symbol=Actb Actin, cytoplasmic 1

Check to include this hit in error tolerant search or archive report

| Query                                                   | Observed | Mr(expt)  | Mr(calc)  | ppm    | Miss | Score | Expect   | Rank | Peptide                |                        |
|---------------------------------------------------------|----------|-----------|-----------|--------|------|-------|----------|------|------------------------|------------------------|
| <input checked="" type="checkbox"/> <a href="#">213</a> | 581.3192 | 1160.6238 | 1160.6111 | 11.0   | 0    | 43    | 0.004    | 1    | K.EITALAPSTMK.I        |                        |
| <input checked="" type="checkbox"/> <a href="#">214</a> | 581.3192 | 1160.6238 | 1160.6111 | 11.0   | 0    | (22)  | 0.51     | 1    | K.EITALAPSTMK.I        |                        |
| <input checked="" type="checkbox"/> <a href="#">227</a> | 599.7656 | 1197.5166 | 1197.5150 | 1.41   | 0    | 46    | 0.00079  | 1    | K.DSYVGDQAQSK.R        |                        |
| <input checked="" type="checkbox"/> <a href="#">583</a> | 895.9476 | 1789.8806 | 1789.8846 | -2.22  | 0    | (40)  | 0.0058   | 1    | K.SYELPDGQVITIGNER.F   |                        |
| <input checked="" type="checkbox"/> <a href="#">584</a> | 895.9503 | 1789.8860 | 1789.8846 | 0.79   | 0    | (55)  | 0.00017  | 1    | K.SYELPDGQVITIGNER.F   |                        |
| <input checked="" type="checkbox"/> <a href="#">585</a> | 895.9514 | 1789.8882 | 1789.8846 | 2.02   | 0    | 93    | 2.7e-008 | 1    | K.SYELPDGQVITIGNER.F   |                        |
| <input checked="" type="checkbox"/> <a href="#">613</a> | 652.0187 | 1953.0343 | 1953.0571 | -11.69 | 0    | (15)  |          | 1.3  | 2                      | R.VAPEEHPVLLTEAPLNPK.A |
| <input checked="" type="checkbox"/> <a href="#">614</a> | 652.0188 | 1953.0346 | 1953.0571 | -11.53 | 0    | 31    | 0.034    | 2    | R.VAPEEHPVLLTEAPLNPK.A |                        |
| <input checked="" type="checkbox"/> <a href="#">615</a> | 652.0193 | 1953.0361 | 1953.0571 | -10.77 | 0    | (21)  | 0.39     | 1    | R.VAPEEHPVLLTEAPLNPK.A |                        |
| <input checked="" type="checkbox"/> <a href="#">616</a> | 652.0218 | 1953.0436 | 1953.0571 | -6.93  | 0    | (7)   |          | 8.3  | 1                      | R.VAPEEHPVLLTEAPLNPK.A |
| <input checked="" type="checkbox"/> <a href="#">618</a> | 652.0227 | 1953.0463 | 1953.0571 | -5.54  | 0    | (19)  |          | 0.5  | 1                      | R.VAPEEHPVLLTEAPLNPK.A |

Proteins matching the same set of peptides:

[IPI00136929](#) Mass: 44029 Score: 157 Queries matched: 11  
 Tax\_Id=10090 Gene\_Symbol=Actg1 Gamma actin-like protein  
[IPI00473320](#) Mass: 42115 Score: 157 Queries matched: 11  
 Tax\_Id=10090 Gene\_Symbol=Actb Putative uncharacterized protein  
[IPI00652436](#) Mass: 42053 Score: 157 Queries matched: 11  
 Tax\_Id=10090 Gene\_Symbol=Actg1 Putative uncharacterized protein  
[IPI00874482](#) Mass: 42108 Score: 157 Queries matched: 11  
 Tax\_Id=10090 Gene\_Symbol=Actg1 Actin, cytoplasmic 2

20. [IPI00221797](#) Mass: 59932 Score: 155 Queries matched: 7 emPAI: 0.05  
 Tax\_Id=10090 Gene\_Symbol=Krt75 Keratin, type II cytoskeletal 75

Check to include this hit in error tolerant search or archive report

| Query                                                   | Observed | Mr(expt)  | Mr(calc)  | ppm    | Miss | Score | Expect   | Rank | Peptide          |                  |
|---------------------------------------------------------|----------|-----------|-----------|--------|------|-------|----------|------|------------------|------------------|
| <input checked="" type="checkbox"/> <a href="#">288</a> | 651.8494 | 1301.6842 | 1301.7078 | -18.11 | 0    | (7)   |          | 15   | 1                | R.SLDLDSIIAEVK.A |
| <input checked="" type="checkbox"/> <a href="#">289</a> | 651.8604 | 1301.7062 | 1301.7078 | -1.21  | 0    | (30)  | 0.062    | 1    | R.SLDLDSIIAEVK.A |                  |
| <input checked="" type="checkbox"/> <a href="#">290</a> | 651.8617 | 1301.7088 | 1301.7078 | 0.79   | 0    | (61)  | 4.8e-005 | 1    | R.SLDLDSIIAEVK.A |                  |
| <input checked="" type="checkbox"/> <a href="#">291</a> | 651.8624 | 1301.7102 | 1301.7078 | 1.86   | 0    | (59)  | 7.4e-005 | 1    | R.SLDLDSIIAEVK.A |                  |
| <input checked="" type="checkbox"/> <a href="#">292</a> | 651.8624 | 1301.7102 | 1301.7078 | 1.86   | 0    | (63)  | 3.1e-005 | 1    | R.SLDLDSIIAEVK.A |                  |
| <input checked="" type="checkbox"/> <a href="#">293</a> | 651.8641 | 1301.7136 | 1301.7078 | 4.47   | 0    | 63    | 2.9e-005 | 1    | R.SLDLDSIIAEVK.A |                  |
| <input checked="" type="checkbox"/> <a href="#">399</a> | 738.8942 | 1475.7738 | 1475.7984 | -16.62 | 1    | 4     |          | 26   | 1                | R.FLEQQNKVLETK.W |

21. [IPI00348328](#) Mass: 114018 Score: 142 Queries matched: 6 emPAI: 0.03  
 Tax\_Id=10090 Gene\_Symbol=Krt78 keratin Kb40

Check to include this hit in error tolerant search or archive report

| Query                                                   | Observed | Mr(expt)  | Mr(calc)  | ppm    | Miss | Score | Expect   | Rank | Peptide          |                              |
|---------------------------------------------------------|----------|-----------|-----------|--------|------|-------|----------|------|------------------|------------------------------|
| <input checked="" type="checkbox"/> <a href="#">114</a> | 504.7170 | 1007.4194 | 1007.4528 | -33.13 | 0    | 5     |          | 7.8  | 1                | K.QDMAQMLR.D + Oxidation (M) |
| <input checked="" type="checkbox"/> <a href="#">345</a> | 692.3474 | 1382.6802 | 1382.6830 | -2.00  | 0    | (60)  | 6.9e-005 | 1    | R.SLNNQFASFIDK.V |                              |
| <input checked="" type="checkbox"/> <a href="#">346</a> | 692.3569 | 1382.6992 | 1382.6830 | 11.7   | 0    | (49)  | 0.00093  | 1    | R.SLNNQFASFIDK.V |                              |
| <input checked="" type="checkbox"/> <a href="#">347</a> | 692.3570 | 1382.6994 | 1382.6830 | 11.9   | 0    | 61    | 6.2e-005 | 1    | R.SLNNQFASFIDK.V |                              |
| <input checked="" type="checkbox"/> <a href="#">348</a> | 692.3643 | 1382.7140 | 1382.6830 | 22.4   | 0    | (49)  | 0.00089  | 1    | R.SLNNQFASFIDK.V |                              |
| <input checked="" type="checkbox"/> <a href="#">399</a> | 738.8942 | 1475.7738 | 1475.7984 | -16.62 | 1    | 4     |          | 26   | 1                | R.FLEQQNKVLETK.W             |

22. [IPI00322209](#) Mass: 54531 Score: 142 Queries matched: 4 emPAI: 0.06  
 Tax\_Id=10090 Gene\_Symbol=Krt8 Keratin, type II cytoskeletal 8

Check to include this hit in error tolerant search or archive report

| Query               | Observed | Mr(expt)  | Mr(calc)  | ppm    | Miss | Score | Expect   | Rank | Peptide         |
|---------------------|----------|-----------|-----------|--------|------|-------|----------|------|-----------------|
| <a href="#">345</a> | 692.3474 | 1382.6802 | 1382.7194 | -28.31 | 1    | (60)  | 6.9e-005 | 1    | K.SLNKPFASFDK.V |
| <a href="#">346</a> | 692.3569 | 1382.6992 | 1382.7194 | -14.57 | 1    | (49)  | 0.00093  | 1    | K.SLNKPFASFDK.V |
| <a href="#">347</a> | 692.3570 | 1382.6994 | 1382.7194 | -14.42 | 1    | 61    | 6.2e-005 | 1    | K.SLNKPFASFDK.V |
| <a href="#">348</a> | 692.3643 | 1382.7140 | 1382.7194 | -3.86  | 1    | (49)  | 0.00089  | 1    | K.SLNKPFASFDK.V |

23. [IPI00221528](#) Mass: 42319 Score: 126 Queries matched: 8 emPAI: 0.16

Tax\_Id=10090 Gene\_Symbol=Actb12 Beta-actin-like protein 2

Check to include this hit in error tolerant search or archive report

| Query                                                   | Observed | Mr(expt)  | Mr(calc)  | ppm    | Miss | Score | Expect   | Rank | Peptide                |
|---------------------------------------------------------|----------|-----------|-----------|--------|------|-------|----------|------|------------------------|
| <a href="#">583</a>                                     | 895.9476 | 1789.8806 | 1789.8846 | -2.22  | 0    | (40)  | 0.0058   | 1    | R.SYELPDGQVITIGNER.F   |
| <a href="#">584</a>                                     | 895.9503 | 1789.8860 | 1789.8846 | 0.79   | 0    | (55)  | 0.00017  | 1    | R.SYELPDGQVITIGNER.F   |
| <a href="#">585</a>                                     | 895.9514 | 1789.8882 | 1789.8846 | 2.02   | 0    | 93    | 2.7e-008 | 1    | R.SYELPDGQVITIGNER.F   |
| <input checked="" type="checkbox"/> <a href="#">613</a> | 652.0187 | 1953.0343 | 1953.0571 | -11.69 | 0    | (16)  | 1.2      | 1    | R.VAPDEHPILLTEAPLNPK.I |
| <input checked="" type="checkbox"/> <a href="#">614</a> | 652.0188 | 1953.0346 | 1953.0571 | -11.53 | 0    | 32    | 0.03     | 1    | R.VAPDEHPILLTEAPLNPK.I |
| <a href="#">615</a>                                     | 652.0193 | 1953.0361 | 1953.0571 | -10.77 | 0    | (13)  | 2.3      | 2    | R.VAPDEHPILLTEAPLNPK.I |
| <a href="#">616</a>                                     | 652.0218 | 1953.0436 | 1953.0571 | -6.93  | 0    | (5)   | 15       | 3    | R.VAPDEHPILLTEAPLNPK.I |
| <a href="#">618</a>                                     | 652.0227 | 1953.0463 | 1953.0571 | -5.54  | 0    | (16)  | 1.1      | 2    | R.VAPDEHPILLTEAPLNPK.I |

24. [IPI00124499](#) Mass: 57802 Score: 105 Queries matched: 5 emPAI: 0.06

Tax\_Id=10090 Gene\_Symbol=Krt79 Keratin, type II cytoskeletal 79

Check to include this hit in error tolerant search or archive report

| Query                                                   | Observed | Mr(expt)  | Mr(calc)  | ppm    | Miss | Score | Expect   | Rank | Peptide          |
|---------------------------------------------------------|----------|-----------|-----------|--------|------|-------|----------|------|------------------|
| <input checked="" type="checkbox"/> <a href="#">314</a> | 665.3632 | 1328.7118 | 1328.7187 | -5.17  | 0    | (34)  | 0.025    | 1    | R.NLDDLIIAEVK.A  |
| <input checked="" type="checkbox"/> <a href="#">315</a> | 665.3666 | 1328.7186 | 1328.7187 | -0.05  | 0    | 73    | 2.9e-006 | 1    | R.NLDDLIIAEVK.A  |
| <input checked="" type="checkbox"/> <a href="#">316</a> | 665.3679 | 1328.7212 | 1328.7187 | 1.90   | 0    | (41)  | 0.0055   | 1    | R.NLDDLIIAEVK.A  |
| <input checked="" type="checkbox"/> <a href="#">317</a> | 665.3680 | 1328.7214 | 1328.7187 | 2.05   | 0    | (42)  | 0.0038   | 1    | R.NLDDLIIAEVK.A  |
| <a href="#">399</a>                                     | 738.8942 | 1475.7738 | 1475.7984 | -16.62 | 1    | 4     | 26       | 1    | R.FLEQQNKVLETK.W |

25. [IPI00230145](#) Mass: 21224 Score: 88 Queries matched: 3 emPAI: 0.16

Tax\_Id=10090 Gene\_Symbol=Fth1 Ferritin heavy chain

Check to include this hit in error tolerant search or archive report

| Query                                                   | Observed | Mr(expt)  | Mr(calc)  | ppm   | Miss | Score | Expect   | Rank | Peptide             |
|---------------------------------------------------------|----------|-----------|-----------|-------|------|-------|----------|------|---------------------|
| <a href="#">79</a>                                      | 438.7601 | 875.5056  | 875.5116  | -6.85 | 0    | 7     | 12       | 5    | R.IFLQDIK.K         |
| <input checked="" type="checkbox"/> <a href="#">487</a> | 815.3727 | 1628.7308 | 1628.7214 | 5.78  | 0    | (45)  | 0.0012   | 1    | K.MGAPEAGMAEYLFDK.H |
| <input checked="" type="checkbox"/> <a href="#">488</a> | 815.3737 | 1628.7328 | 1628.7214 | 7.01  | 0    | 75    | 1.3e-006 | 1    | K.MGAPEAGMAEYLFDK.H |

26. [IPI00406377](#) Mass: 50678 Score: 82 Queries matched: 6 emPAI: 0.06

Tax\_Id=10090 Gene\_Symbol=Krt7 Keratin, type II cytoskeletal 7

Check to include this hit in error tolerant search or archive report

| Query               | Observed | Mr(expt)  | Mr(calc)  | ppm    | Miss | Score | Expect  | Rank | Peptide         |
|---------------------|----------|-----------|-----------|--------|------|-------|---------|------|-----------------|
| <a href="#">104</a> | 487.2706 | 972.5266  | 972.5352  | -8.81  | 1    | 10    | 9.1     | 8    | K.SAKSSQLPR.I   |
| <a href="#">279</a> | 639.3514 | 1276.6882 | 1276.7027 | -11.29 | 0    | (9)   | 9.3     | 1    | K.LALDIEIATYR.K |
| <a href="#">280</a> | 639.3543 | 1276.6940 | 1276.7027 | -6.75  | 0    | (46)  | 0.0019  | 1    | K.LALDIEIATYR.K |
| <a href="#">281</a> | 639.3561 | 1276.6976 | 1276.7027 | -3.93  | 0    | (47)  | 0.0012  | 1    | K.LALDIEIATYR.K |
| <a href="#">282</a> | 639.3570 | 1276.6994 | 1276.7027 | -2.52  | 0    | 54    | 0.00024 | 1    | K.LALDIEIATYR.K |
| <a href="#">283</a> | 639.3654 | 1276.7162 | 1276.7027 | 10.6   | 0    | (28)  | 0.071   | 1    | K.LALDIEIATYR.K |

27. [IPI00222228](#) Mass: 58587 Score: 82 Queries matched: 6 emPAI: 0.06

Tax\_Id=10090 Gene\_Symbol=4732456N10Rik hypothetical protein LOC239673

Check to include this hit in error tolerant search or archive report

| Query               | Observed | Mr(expt)  | Mr(calc)  | ppm    | Miss | Score | Expect  | Rank | Peptide          |
|---------------------|----------|-----------|-----------|--------|------|-------|---------|------|------------------|
| <a href="#">279</a> | 639.3514 | 1276.6882 | 1276.7027 | -11.29 | 0    | (9)   | 9.3     | 1    | K.LALDIEIATYR.K  |
| <a href="#">280</a> | 639.3543 | 1276.6940 | 1276.7027 | -6.75  | 0    | (46)  | 0.0019  | 1    | K.LALDIEIATYR.K  |
| <a href="#">281</a> | 639.3561 | 1276.6976 | 1276.7027 | -3.93  | 0    | (47)  | 0.0012  | 1    | K.LALDIEIATYR.K  |
| <a href="#">282</a> | 639.3570 | 1276.6994 | 1276.7027 | -2.52  | 0    | 54    | 0.00024 | 1    | K.LALDIEIATYR.K  |
| <a href="#">283</a> | 639.3654 | 1276.7162 | 1276.7027 | 10.6   | 0    | (28)  | 0.071   | 1    | K.LALDIEIATYR.K  |
| <a href="#">399</a> | 738.8942 | 1475.7738 | 1475.7984 | -16.62 | 1    | 4     | 26      | 1    | R.FLEQQNKVLETK.W |

28. [IPI00135284](#) Mass: 36092 Score: 78 Queries matched: 7 emPAI: 0.19

Tax\_Id=10090 Gene\_Symbol=Gml6374 Glyceraldehyde-3-phosphate dehydrogenase

Check to include this hit in error tolerant search or archive report

| Query                                                   | Observed | Mr(expt)  | Mr(calc)  | ppm    | Miss | Score | Expect   | Rank | Peptide             |
|---------------------------------------------------------|----------|-----------|-----------|--------|------|-------|----------|------|---------------------|
| <input checked="" type="checkbox"/> <a href="#">333</a> | 678.8232 | 1355.6318 | 1355.6465 | -10.80 | 1    | (21)  | 0.41     | 1    | R.VVDLMAYMASKE.-    |
| <input checked="" type="checkbox"/> <a href="#">334</a> | 678.8466 | 1355.6786 | 1355.6465 | 23.7   | 1    | 43    | 0.0032   | 1    | R.VVDLMAYMASKE.-    |
| <input checked="" type="checkbox"/> <a href="#">335</a> | 685.3756 | 1368.7366 | 1368.7361 | 0.40   | 0    | (50)  | 0.00057  | 1    | R.GAAQNIIPASTGAAK.A |
| <input checked="" type="checkbox"/> <a href="#">336</a> | 685.3767 | 1368.7388 | 1368.7361 | 2.01   | 0    | (39)  | 0.0079   | 1    | R.GAAQNIIPASTGAAK.A |
| <input checked="" type="checkbox"/> <a href="#">337</a> | 685.3770 | 1368.7394 | 1368.7361 | 2.45   | 0    | (20)  | 0.53     | 1    | R.GAAQNIIPASTGAAK.A |
| <input checked="" type="checkbox"/> <a href="#">338</a> | 685.3795 | 1368.7444 | 1368.7361 | 6.10   | 0    | 58    | 9.3e-005 | 1    | R.GAAQNIIPASTGAAK.A |
| <input checked="" type="checkbox"/> <a href="#">573</a> | 890.4178 | 1778.8210 | 1778.7900 | 17.5   | 0    | 25    | 0.17     | 1    | K.LISWYDNEYGYSNR.V  |

Proteins matching the same set of peptides:

[IPI00271869](#) Mass: 36293 Score: 78 Queries matched: 7

Tax\_Id=10090 Gene\_Symbol=- 36 kDa protein



[IPI00273646](#) Mass: 36072 Score: 78 Queries matched: 7  
 Tax\_Id=10090 Gene\_Symbol=Gapdh;LOC100042025 Glyceraldehyde-3-phosphate dehydrogenase  
[IPI00622795](#) Mass: 36074 Score: 78 Queries matched: 7  
 Tax\_Id=10090 Gene\_Symbol=- 36 kDa protein  
[IPI00752289](#) Mass: 36308 Score: 78 Queries matched: 7  
 Tax\_Id=10090 Gene\_Symbol=Gm10290 Glyceraldehyde-3-phosphate dehydrogenase  
[IPI00848801](#) Mass: 36100 Score: 78 Queries matched: 7  
 Tax\_Id=10090 Gene\_Symbol=- 36 kDa protein  
[IPI00849045](#) Mass: 36072 Score: 78 Queries matched: 7  
 Tax\_Id=10090 Gene\_Symbol=- 36 kDa protein  
[IPI00850337](#) Mass: 44633 Score: 78 Queries matched: 7  
 Tax\_Id=10090 Gene\_Symbol=LOC100048117 similar to Glyceraldehyde-3-phosphate dehydrogenase (GAPDH) isoform 1  
[IPI00850377](#) Mass: 35975 Score: 78 Queries matched: 7  
 Tax\_Id=10090 Gene\_Symbol=- 36 kDa protein  
[IPI00850779](#) Mass: 36076 Score: 78 Queries matched: 7  
 Tax\_Id=10090 Gene\_Symbol=- 36 kDa protein  
[IPI00874682](#) Mass: 36038 Score: 78 Queries matched: 7  
 Tax\_Id=10090 Gene\_Symbol=- 36 kDa protein  
[IPI00874964](#) Mass: 36512 Score: 78 Queries matched: 7  
 Tax\_Id=10090 Gene\_Symbol=- 36 kDa protein

29. [IPI00134997](#) Mass: 106777 Score: 78 Queries matched: 1 emPAI: 0.03

Tax\_Id=10090 Gene\_Symbol=Dlgap3 Disks large-associated protein 3

Check to include this hit in error tolerant search or archive report

| Query                                                   | Observed | Mr(expt)  | Mr(calc)  | ppm   | Miss | Score | Expect | Rank | Peptide              |
|---------------------------------------------------------|----------|-----------|-----------|-------|------|-------|--------|------|----------------------|
| <input checked="" type="checkbox"/> <a href="#">405</a> | 751.8646 | 1501.7146 | 1501.7274 | -8.46 | 0    | 78    | 1e-006 | 1    | R.GPAGPGPGSGAAPEAR.S |

Proteins matching the same set of peptides:

[IPI00648401](#) Mass: 105576 Score: 78 Queries matched: 1  
 Tax\_Id=10090 Gene\_Symbol=Dlgap3 Discs, large (Drosophila) homolog-associated protein 3

30. [IPI00348094](#) Mass: 51093 Score: 75 Queries matched: 6 emPAI: 0.06

Tax\_Id=10090 Gene\_Symbol=Tubbl1 Tubulin, beta 1

Check to include this hit in error tolerant search or archive report

| Query               | Observed | Mr(expt)  | Mr(calc)  | ppm   | Miss | Score | Expect   | Rank | Peptide          |
|---------------------|----------|-----------|-----------|-------|------|-------|----------|------|------------------|
| <a href="#">191</a> | 572.3217 | 1142.6288 | 1142.6270 | 1.59  | 0    | 69    | 1.1e-005 | 1    | K.LAVNMVPPFR.L   |
| <a href="#">192</a> | 572.3229 | 1142.6312 | 1142.6270 | 3.69  | 0    | (38)  | 0.013    | 1    | K.LAVNMVPPFR.L   |
| <a href="#">308</a> | 660.3503 | 1318.6860 | 1318.6955 | -7.16 | 0    | (11)  | 5.8      | 2    | R.ILNSFSVMPSPK.V |
| <a href="#">309</a> | 660.3552 | 1318.6958 | 1318.6955 | 0.27  | 0    | (13)  | 4.1      | 2    | R.ILNSFSVMPSPK.V |
| <a href="#">310</a> | 660.3563 | 1318.6980 | 1318.6955 | 1.94  | 0    | 21    | 0.63     | 2    | R.ILNSFSVMPSPK.V |
| <a href="#">311</a> | 660.3572 | 1318.6998 | 1318.6955 | 3.30  | 0    | (16)  | 1.9      | 2    | R.ILNSFSVMPSPK.V |

31. [IPI00115546](#) Mass: 40524 Score: 70 Queries matched: 5 emPAI: 0.17

Tax\_Id=10090 Gene\_Symbol=Gnaol Isoform Alpha-2 of Guanine nucleotide-binding protein G(o) subunit alpha

Check to include this hit in error tolerant search or archive report

| Query                                                   | Observed | Mr(expt)  | Mr(calc)  | ppm  | Miss | Score | Expect  | Rank | Peptide               |
|---------------------------------------------------------|----------|-----------|-----------|------|------|-------|---------|------|-----------------------|
| <input checked="" type="checkbox"/> <a href="#">150</a> | 529.3204 | 1056.6262 | 1056.6179 | 7.91 | 0    | 45    | 0.0019  | 1    | K.LLLLGAGESGK.S       |
| <input checked="" type="checkbox"/> <a href="#">520</a> | 838.4207 | 1674.8268 | 1674.8213 | 3.31 | 0    | 55    | 0.00023 | 1    | R.IGAGDYQPTQDILR.T    |
| <input checked="" type="checkbox"/> <a href="#">621</a> | 979.4400 | 1956.8654 | 1956.8631 | 1.21 | 0    | (7)   | 5.7     | 1    | R.MEDTEFFSAELLSAMMR.L |
| <input checked="" type="checkbox"/> <a href="#">622</a> | 979.4463 | 1956.8780 | 1956.8631 | 7.65 | 0    | (5)   | 11      | 1    | R.MEDTEFFSAELLSAMMR.L |
| <input checked="" type="checkbox"/> <a href="#">623</a> | 979.4526 | 1956.8906 | 1956.8631 | 14.1 | 0    | 10    | 4.2     | 1    | R.MEDTEFFSAELLSAMMR.L |

Proteins matching the same set of peptides:

[IPI00230192](#) Mass: 40629 Score: 70 Queries matched: 5  
 Tax\_Id=10090 Gene\_Symbol=Gnaol Isoform Alpha-1 of Guanine nucleotide-binding protein G(o) subunit alpha

32. [IPI00122094](#) Mass: 85656 Score: 65 Queries matched: 3 emPAI: 0.08

Tax\_Id=10090 Gene\_Symbol=Dlg4 Isoform 2 of Disks large homolog 4

Check to include this hit in error tolerant search or archive report

| Query                                                   | Observed | Mr(expt)  | Mr(calc)  | ppm   | Miss | Score | Expect | Rank | Peptide              |
|---------------------------------------------------------|----------|-----------|-----------|-------|------|-------|--------|------|----------------------|
| <input checked="" type="checkbox"/> <a href="#">185</a> | 563.2996 | 1124.5846 | 1124.5938 | -8.15 | 0    | 46    | 0.0019 | 1    | K.IIPGAAAQDGR.L      |
| <input checked="" type="checkbox"/> <a href="#">561</a> | 857.9614 | 1713.9082 | 1713.9090 | -0.44 | 0    | 42    | 0.0032 | 1    | R.VIEDLSGPIYIWPVPE.E |
| <input checked="" type="checkbox"/> <a href="#">562</a> | 857.9666 | 1713.9186 | 1713.9090 | 5.63  | 0    | (26)  | 0.13   | 1    | R.VIEDLSGPIYIWPVPE.E |

Proteins matching the same set of peptides:

[IPI00622720](#) Mass: 80765 Score: 65 Queries matched: 3  
 Tax\_Id=10090 Gene\_Symbol=Dlg4 Isoform 1 of Disks large homolog 4  
[IPI00626797](#) Mass: 80395 Score: 65 Queries matched: 3  
 Tax\_Id=10090 Gene\_Symbol=Dlg4 Isoform 3 of Disks large homolog 4

33. [IPI00119667](#) Mass: 50764 Score: 53 Queries matched: 1 emPAI: 0.06

Tax\_Id=10090 Gene\_Symbol=Eef1a2 Elongation factor 1-alpha 2

Check to include this hit in error tolerant search or archive report

| Query                                                   | Observed | Mr(expt)  | Mr(calc)  | ppm   | Miss | Score | Expect  | Rank | Peptide        |
|---------------------------------------------------------|----------|-----------|-----------|-------|------|-------|---------|------|----------------|
| <input checked="" type="checkbox"/> <a href="#">116</a> | 513.3045 | 1024.5944 | 1024.6030 | -8.30 | 0    | 53    | 0.00015 | 1    | K.IGGIGTVVGR.V |

Proteins matching the same set of peptides:

[IPI00307837](#) Mass: 50424 Score: 53 Queries matched: 1

Tax\_Id=10090 Gene\_Symbol=Eef1a1 Elongation factor 1-alpha 1

34. [IPI00135197](#) Score: 53 Queries matched: 2  
Tax\_Id=10090 Gene\_Symbol=Krt20 Keratin, type I cytoskeletal 20  
 Check to include this hit in error tolerant search or archive report

| Query               | Observed | Mr(expt)  | Mr(calc)  | ppm   | Miss | Score | Expect | Rank | Peptide                       |
|---------------------|----------|-----------|-----------|-------|------|-------|--------|------|-------------------------------|
| <a href="#">170</a> | 545.7681 | 1089.5216 | 1089.5237 | -1.85 | 0    | 47    | 0.0016 | 2    | K.LAMQNLNDR.L + Oxidation (M) |
| <a href="#">171</a> | 545.7692 | 1089.5238 | 1089.5237 | 0.17  | 0    | (45)  | 0.0024 | 2    | K.LAMQNLNDR.L + Oxidation (M) |

35. [IPI00467833](#) Mass: 32684 Score: 45 Queries matched: 1 emPAI: 0.10  
Tax\_Id=10090 Gene\_Symbol=Tpi1 triosephosphate isomerase  
 Check to include this hit in error tolerant search or archive report

| Query                                                   | Observed | Mr(expt)  | Mr(calc)  | ppm    | Miss | Score | Expect | Rank | Peptide          |
|---------------------------------------------------------|----------|-----------|-----------|--------|------|-------|--------|------|------------------|
| <input checked="" type="checkbox"/> <a href="#">249</a> | 624.2955 | 1246.5764 | 1246.5902 | -11.03 | 0    | 45    | 0.0017 | 1    | K.SNVNDGVAQSTR.I |

36. [IPI00118569](#) Mass: 44369 Score: 45 Queries matched: 1 emPAI: 0.07  
Tax\_Id=10090 Gene\_Symbol=Gna13 Guanine nucleotide-binding protein subunit alpha-13  
 Check to include this hit in error tolerant search or archive report

| Query               | Observed | Mr(expt)  | Mr(calc)  | ppm  | Miss | Score | Expect | Rank | Peptide         |
|---------------------|----------|-----------|-----------|------|------|-------|--------|------|-----------------|
| <a href="#">150</a> | 529.3204 | 1056.6262 | 1056.6179 | 7.91 | 0    | 45    | 0.0019 | 1    | K.ILLLGAGESGK.S |

Proteins matching the same set of peptides:

|                                                                                    |             |           |                    |
|------------------------------------------------------------------------------------|-------------|-----------|--------------------|
| <a href="#">IPI00230191</a>                                                        | Mass: 44238 | Score: 45 | Queries matched: 1 |
| Tax_Id=10090 Gene_Symbol=Gna12 Guanine nucleotide-binding protein subunit alpha-12 |             |           |                    |
| <a href="#">IPI00649388</a>                                                        | Mass: 20095 | Score: 45 | Queries matched: 1 |
| Tax_Id=10090 Gene_Symbol=Gna13 Putative uncharacterized protein                    |             |           |                    |

37. [IPI00462072](#) Mass: 47453 Score: 44 Queries matched: 1 emPAI: 0.07  
Tax\_Id=10090 Gene\_Symbol=Enol;Gm5506 Alpha-enolase  
 Check to include this hit in error tolerant search or archive report

| Query                                                   | Observed | Mr(expt)  | Mr(calc)  | ppm  | Miss | Score | Expect | Rank | Peptide          |
|---------------------------------------------------------|----------|-----------|-----------|------|------|-------|--------|------|------------------|
| <input checked="" type="checkbox"/> <a href="#">362</a> | 720.3760 | 1438.7374 | 1438.7344 | 2.14 | 0    | 44    | 0.0025 | 1    | R.YITPDQLADLYK.S |

Proteins matching the same set of peptides:

|                                       |             |           |                    |
|---------------------------------------|-------------|-----------|--------------------|
| <a href="#">IPI00648821</a>           | Mass: 40099 | Score: 44 | Queries matched: 1 |
| Tax_Id=10090 Gene_Symbol=Enol Enolase |             |           |                    |

38. [IPI00120793](#) Mass: 28131 Score: 41 Queries matched: 2 emPAI: 0.12  
Tax\_Id=10090 Gene\_Symbol=Prnp Major prion protein  
 Check to include this hit in error tolerant search or archive report

| Query                                                   | Observed | Mr(expt)  | Mr(calc)  | ppm   | Miss | Score | Expect | Rank | Peptide        |
|---------------------------------------------------------|----------|-----------|-----------|-------|------|-------|--------|------|----------------|
| <input checked="" type="checkbox"/> <a href="#">166</a> | 544.7459 | 1087.4772 | 1087.4570 | 18.6  | 0    | 8     | 5.6    | 1    | K.ESQAYYDGR.R  |
| <input checked="" type="checkbox"/> <a href="#">189</a> | 570.2626 | 1138.5106 | 1138.5142 | -3.15 | 0    | 41    | 0.0039 | 1    | K.GENFTETDVK.M |

39. [IPI00113410](#) Mass: 38586 Score: 40 Queries matched: 2 emPAI: 0.09  
Tax\_Id=10090 Gene\_Symbol=Hapln2 Hyaluronan and proteoglycan link protein 2  
 Check to include this hit in error tolerant search or archive report

| Query                                                   | Observed | Mr(expt)  | Mr(calc)  | ppm   | Miss | Score | Expect | Rank | Peptide           |
|---------------------------------------------------------|----------|-----------|-----------|-------|------|-------|--------|------|-------------------|
| <input checked="" type="checkbox"/> <a href="#">354</a> | 696.3665 | 1390.7184 | 1390.7245 | -4.35 | 0    | 40    | 0.0065 | 1    | R.LEGVVFFYPQPSR.G |
| <input checked="" type="checkbox"/> <a href="#">355</a> | 696.3699 | 1390.7252 | 1390.7245 | 0.54  | 0    | (29)  | 0.092  | 1    | R.LEGVVFFYPQPSR.G |

40. [IPI00622240](#) Mass: 71336 Score: 39 Queries matched: 5 emPAI: 0.05  
Tax\_Id=10090 Gene\_Symbol=Krt2 Keratin, type II cytoskeletal 2 epidermal  
 Check to include this hit in error tolerant search or archive report

| Query                                                   | Observed | Mr(expt)  | Mr(calc)  | ppm    | Miss | Score | Expect | Rank | Peptide            |
|---------------------------------------------------------|----------|-----------|-----------|--------|------|-------|--------|------|--------------------|
| <a href="#">182</a>                                     | 556.7426 | 1111.4706 | 1111.4643 | 5.72   | 0    | 0     | 24     | 9    | R.GSGGGYGGSGGSR.G  |
| <input checked="" type="checkbox"/> <a href="#">222</a> | 590.3031 | 1178.5916 | 1178.6183 | -22.60 | 0    | (23)  | 0.42   | 1    | K.YEELQVTAVK.H     |
| <input checked="" type="checkbox"/> <a href="#">223</a> | 590.3059 | 1178.5972 | 1178.6183 | -17.85 | 0    | (32)  | 0.054  | 1    | K.YEELQVTAVK.H     |
| <input checked="" type="checkbox"/> <a href="#">224</a> | 590.3073 | 1178.6000 | 1178.6183 | -15.47 | 0    | 35    | 0.025  | 1    | K.YEELQVTAVK.H     |
| <input checked="" type="checkbox"/> <a href="#">251</a> | 627.8073 | 1253.6000 | 1253.6001 | -0.00  | 0    | 39    | 0.01   | 1    | R.GFSSGSAVVVSGSR.R |

Proteins matching the same set of peptides:

|                                              |             |           |                    |
|----------------------------------------------|-------------|-----------|--------------------|
| <a href="#">IPI00875096</a>                  | Mass: 71035 | Score: 39 | Queries matched: 5 |
| Tax_Id=10090 Gene_Symbol=Krt2 71 kDa protein |             |           |                    |

Peptide matches not assigned to protein hits: (no details means no match)

| Query                                                   | Observed | Mr(expt)  | Mr(calc)  | ppm    | Miss | Score | Expect | Rank | Peptide      |
|---------------------------------------------------------|----------|-----------|-----------|--------|------|-------|--------|------|--------------|
| <input checked="" type="checkbox"/> <a href="#">250</a> | 626.3681 | 1250.7216 | 1250.7347 | -10.42 | 0    | 36    | 0.0076 | 1    | GVAGAPPTVTLR |
| <input checked="" type="checkbox"/> <a href="#">305</a> | 656.3151 | 1310.6156 | 1310.5999 | 12.0   | 0    | 35    | 0.018  | 1    | QMYMLPQGEK   |
| <input checked="" type="checkbox"/> <a href="#">132</a> | 520.2753 | 1038.5360 | 1038.5458 | -9.37  | 0    | 34    | 0.028  | 1    | AQASAPAQAPK  |
| <input checked="" type="checkbox"/> <a href="#">229</a> | 614.8425 | 1227.6704 | 1227.6711 | -0.50  | 0    | 33    | 0.033  | 1    | TSGPPVSELITK |
| <input checked="" type="checkbox"/> <a href="#">136</a> | 523.2849 | 1044.5552 | 1044.5564 | -1.06  | 0    | 30    | 0.094  | 1    | INDITLNSR    |
| <input checked="" type="checkbox"/> <a href="#">208</a> | 578.8143 | 1155.6140 | 1155.6135 | 0.45   | 0    | 30    | 0.073  | 1    | SLPNEEIVQK   |

|     |           |           |           |        |   |    |      |   |                                                        |
|-----|-----------|-----------|-----------|--------|---|----|------|---|--------------------------------------------------------|
| 104 | 487.2706  | 972.5266  | 972.5240  | 2.74   | 0 | 29 | 0.12 | 1 | EIISEVQR                                               |
| 159 | 533.2659  | 1064.5172 | 1064.5138 | 3.23   | 0 | 28 | 0.11 | 1 | AQYEDIAQK                                              |
| 133 | 520.2761  | 1038.5376 | 1038.5458 | -7.83  | 0 | 28 | 0.11 | 1 | AQASAPAQPK                                             |
| 230 | 614.8445  | 1227.6744 | 1227.6711 | 2.75   | 0 | 25 | 0.23 | 1 | TSGPPVSELTIK                                           |
| 252 | 628.8171  | 1255.6196 | 1255.6157 | 3.16   | 0 | 25 | 0.23 | 1 | GGSGQEAUGELPR                                          |
| 71  | 435.7725  | 869.5304  | 869.4971  | 38.4   | 0 | 25 | 0.14 | 1 | AVVESLPR                                               |
| 231 | 614.8458  | 1227.6770 | 1227.6711 | 4.87   | 0 | 25 | 0.24 | 1 | TSGPPVSELTIK                                           |
| 160 | 533.2675  | 1064.5204 | 1064.5138 | 6.24   | 0 | 21 | 0.6  | 1 | AQYEDIAQK                                              |
| 134 | 523.2794  | 1044.5442 | 1044.5564 | -11.59 | 0 | 20 | 0.87 | 1 | INDITLNSR                                              |
| 237 | 616.7883  | 1231.5620 | 1231.5680 | -4.86  | 0 | 20 | 0.57 | 1 | AVIESDEEQGR                                            |
| 105 | 487.2718  | 972.5290  | 972.5240  | 5.20   | 0 | 19 | 1.1  | 1 | EIISEVQR                                               |
| 84  | 449.2162  | 896.4178  | 896.4214  | -4.02  | 0 | 19 | 0.62 | 1 | MWLEFR + Oxidation (M)                                 |
| 66  | 428.7654  | 855.5162  | 855.5542  | -44.32 | 0 | 19 | 0.62 | 1 | TLAVLALR                                               |
| 358 | 698.8622  | 1395.7098 | 1395.6630 | 33.6   | 0 | 19 | 0.92 | 1 | ALGTSDEPGAEPFR                                         |
| 165 | 543.3147  | 1084.6148 | 1084.5811 | 31.1   | 1 | 18 | 0.99 | 1 | EAIRLAPCR                                              |
| 112 | 496.2298  | 990.4450  | 990.4883  | -43.65 | 0 | 17 | 0.94 | 1 | AFSSHSSLR                                              |
| 357 | 698.8580  | 1395.7014 | 1395.6630 | 27.5   | 0 | 17 | 1.2  | 1 | ALGTSDEPGAEPFR                                         |
| 437 | 785.8483  | 1569.6820 | 1569.7531 | -45.25 | 0 | 17 | 0.57 | 1 | SLMQCAGESISLTK                                         |
| 479 | 810.3789  | 1618.7432 | 1618.7331 | 6.26   | 0 | 17 | 1    | 1 | SSSMVLGSGFTDLMR + 2 Oxidation (M)                      |
| 56  | 412.7523  | 823.4900  | 823.4817  | 10.2   | 0 | 17 | 0.53 | 1 | RPWLPR                                                 |
| 360 | 472.9068  | 1415.6986 | 1415.7521 | -37.80 | 1 | 17 | 1.6  | 1 | ELARWIGVTESR                                           |
| 13  | 475.2986  | 474.2913  | 474.2802  | 23.5   | 0 | 17 | 2.5  | 1 | LGGTK                                                  |
| 684 | 786.0964  | 2355.2674 | 2355.2012 | 28.1   | 0 | 17 | 0.76 | 1 | QALQFAFVIVIEQVGTQPFNR                                  |
| 89  | 450.7500  | 899.4854  | 899.5076  | -24.63 | 1 | 16 | 1.9  | 1 | GAPKESALK                                              |
| 212 | 581.2999  | 1160.5852 | 1160.5543 | 26.7   | 1 | 16 | 2.6  | 1 | AAPGRMCSVGR                                            |
| 624 | 656.6460  | 1966.9162 | 1966.9669 | -25.81 | 1 | 16 | 1.3  | 1 | ALVAMNESLKSQEQEFK + Oxidation (M)                      |
| 370 | 730.9049  | 1459.7952 | 1459.7453 | 34.2   | 1 | 15 | 1.6  | 1 | VDILENRVMDTR                                           |
| 210 | 579.3053  | 1156.5960 | 1156.6353 | -33.92 | 0 | 15 | 2.6  | 1 | VVSWNINGIR                                             |
| 158 | 533.2621  | 1064.5096 | 1064.5138 | -3.91  | 0 | 15 | 2.5  | 1 | AQYEDIAQK                                              |
| 41  | 327.7021  | 653.3896  | 653.3609  | 44.0   | 0 | 14 | 0.98 | 1 | ALGTHR                                                 |
| 113 | 499.2547  | 996.4948  | 996.5352  | -40.53 | 0 | 14 | 2.5  | 1 | IGTQPPAASR                                             |
| 172 | 546.7492  | 1091.4838 | 1091.5281 | -40.52 | 0 | 14 | 1.8  | 1 | TLLMENAER + Oxidation (M)                              |
| 94  | 460.2562  | 918.4978  | 918.4705  | 29.8   | 1 | 14 | 4.1  | 1 | EVTGAMRR                                               |
| 82  | 443.7305  | 885.4464  | 885.4304  | 18.1   | 1 | 14 | 2.4  | 1 | KDPNAEGR                                               |
| 25  | 574.3228  | 573.3155  | 573.3122  | 5.78   | 0 | 13 | 6.1  | 1 | DIQAK                                                  |
| 521 | 846.4363  | 1690.8580 | 1690.8084 | 29.4   | 1 | 13 | 3    | 1 | MTSTTPPGEDIKSSPK + Oxidation (M)                       |
| 369 | 730.9024  | 1459.7902 | 1459.7453 | 30.8   | 1 | 13 | 2.7  | 1 | VDILENRVMDTR                                           |
| 122 | 517.2615  | 1032.5084 | 1032.4724 | 35.0   | 0 | 13 | 4    | 1 | VLDEEGSER                                              |
| 219 | 585.3231  | 1168.6316 | 1168.6492 | -15.03 | 1 | 13 | 2.9  | 1 | KVSSFDVFLK                                             |
| 236 | 616.3319  | 1230.6492 | 1230.6245 | 20.1   | 0 | 13 | 4.1  | 1 | AWVEQEGVSVK                                            |
| 763 | 1019.4843 | 4073.9081 | 4074.0473 | -34.18 | 1 | 13 | 0.98 | 1 | SSLISARLISMDDLSSAAPLSSALVHSSAQLSCRDPDR + Oxidation (M) |
| 79  | 438.7601  | 875.5056  | 875.4786  | 30.9   | 1 | 13 | 2.9  | 1 | KMDELLK                                                |
| 123 | 517.2618  | 1032.5090 | 1032.4724 | 35.5   | 0 | 13 | 4.4  | 1 | VLDEEGSER                                              |
| 55  | 412.7522  | 823.4898  | 823.4817  | 9.93   | 0 | 13 | 1.4  | 1 | RPWLPR                                                 |
| 177 | 554.2685  | 1106.5224 | 1106.5251 | -2.38  | 1 | 13 | 3.7  | 1 | SGCGLTRSNR                                             |
| 286 | 647.3292  | 1292.6438 | 1292.6336 | 7.96   | 0 | 13 | 4.2  | 1 | TFNAPWMALAR + Oxidation (M)                            |
| 67  | 428.7656  | 855.5166  | 855.5178  | -1.34  | 0 | 12 | 2.9  | 1 | LLSTPGLR                                               |
| 325 | 672.3442  | 1342.6738 | 1342.6729 | 0.73   | 0 | 11 | 5.3  | 1 | QDVTLEPSPTR                                            |
| 77  | 437.7505  | 873.4864  | 873.4807  | 6.55   | 0 | 11 | 7.8  | 1 | VAVEELSK                                               |
| 74  | 435.7740  | 869.5334  | 869.5123  | 24.3   | 0 | 11 | 2.9  | 1 | VSLWLPR                                                |
| 73  | 435.7737  | 869.5328  | 869.5123  | 23.6   | 0 | 11 | 3    | 1 | VSLWLPR                                                |
| 269 | 631.7998  | 1261.5850 | 1261.5826 | 1.92   | 0 | 11 | 4.7  | 1 | EALVDWSGEK                                             |
| 146 | 529.2684  | 1056.5222 | 1056.5464 | -22.90 | 1 | 11 | 5.3  | 1 | HELFPREAR                                              |
| 65  | 428.7642  | 855.5138  | 855.5112  | 3.04   | 1 | 11 | 4.3  | 1 | ALRMLPR                                                |
| 127 | 517.7664  | 1033.5182 | 1033.5338 | -15.09 | 1 | 11 | 8.4  | 1 | CISRTEIR                                               |
| 97  | 461.2222  | 920.4298  | 920.4716  | -45.31 | 0 | 10 | 7    | 1 | ISAAGYPSR                                              |
| 431 | 785.8430  | 1569.6714 | 1569.7254 | -34.40 | 1 | 10 | 2.5  | 1 | MSVFPDRDMMVMR + Oxidation (M)                          |
| 62  | 421.7567  | 841.4988  | 841.4810  | 21.2   | 0 | 10 | 5.1  | 1 | AVLTPWR                                                |
| 380 | 738.3709  | 1474.7272 | 1474.6787 | 32.9   | 1 | 10 | 6.8  | 1 | VDTEPKAEASGDK                                          |
| 274 | 634.3513  | 1266.6880 | 1266.7084 | -16.09 | 1 | 10 | 5.1  | 1 | LYLGRVVEVR                                             |
| 162 | 539.2801  | 1076.5456 | 1076.5648 | -17.79 | 1 | 10 | 8.8  | 1 | MIGERNITK + Oxidation (M)                              |
| 392 | 738.3838  | 1474.7530 | 1474.8065 | -36.24 | 1 | 10 | 7.1  | 1 | VESLLENMGIKVK + Oxidation (M)                          |
| 245 | 618.2814  | 1234.5482 | 1234.5426 | 4.60   | 0 | 10 | 4.5  | 1 | ETAGSSGSTPEGR                                          |
| 169 | 545.2915  | 1088.5684 | 1088.5397 | 26.4   | 0 | 10 | 9.1  | 1 | MGSADRPALR + Oxidation (M)                             |
| 466 | 804.3981  | 1606.7816 | 1606.8454 | -39.66 | 0 | 10 | 6.9  | 1 | VEVELLSYEQGLK                                          |
| 640 | 1040.0016 | 2077.9886 | 2077.8876 | 48.6   | 0 | 10 | 5.1  | 1 | LMCSLCHCPGATIGCDVK                                     |
| 391 | 738.3832  | 1474.7518 | 1474.7813 | -19.99 | 1 | 10 | 7.9  | 1 | VKALESAVNMLR + Oxidation (M)                           |
| 691 | 837.3803  | 2509.1191 | 2509.1301 | -4.39  | 0 | 10 | 3.2  | 1 | LTLQSHRPTCCCYLDFHSSK                                   |
| 323 | 671.3476  | 1340.6806 | 1340.6282 | 39.1   | 0 | 10 | 7.4  | 1 | AVSPENMVTYSK + Oxidation (M)                           |
| 173 | 546.7579  | 1091.5012 | 1091.5393 | -34.88 | 1 | 10 | 6.2  | 1 | KEMASGVNTR                                             |
| 57  | 412.7530  | 823.4914  | 823.4817  | 11.9   | 0 | 10 | 3.1  | 1 | RPWLPR                                                 |
| 270 | 631.8015  | 1261.5884 | 1261.5826 | 4.61   | 0 | 10 | 7    | 1 | EALVDWSGEK                                             |
| 706 | 894.7648  | 2681.2726 | 2681.2755 | -1.11  | 0 | 9  | 4.5  | 1 | VVSAMVNSLDDNGVLIGNWTGDYSR                              |
| 49  | 379.7106  | 757.4066  | 757.3719  | 45.9   | 0 | 9  | 11   | 1 | DGPLNSR                                                |
| 102 | 485.7497  | 969.4848  | 969.5131  | -29.16 | 0 | 9  | 7    | 1 | VVEGPGTPSK                                             |
| 368 | 730.9019  | 1459.7892 | 1459.7453 | 30.1   | 1 | 9  | 7.2  | 1 | VDILENRVMDTR                                           |
| 705 | 894.4244  | 2680.2514 | 2680.3420 | -33.81 | 1 | 9  | 4.1  | 1 | NLTAGMAMITCREPLMSISTNLK + Oxidation (M)                |
| 168 | 545.2596  | 1088.5046 | 1088.5462 | -38.16 | 0 | 9  | 7.3  | 1 | SSVLNLANLR                                             |
| 324 | 671.3478  | 1340.6810 | 1340.7048 | -17.73 | 0 | 9  | 9.2  | 1 | NPQSTSLLPFGAR                                          |
| 154 | 532.2648  | 1062.5150 | 1062.4764 | 36.4   | 0 | 9  | 11   | 1 | DASISSCPAR                                             |
| 80  | 438.7608  | 875.5070  | 875.4786  | 32.5   | 1 | 9  | 7.9  | 1 | KLEMDLK                                                |

|     |           |           |           |        |   |   |     |   |                                                |
|-----|-----------|-----------|-----------|--------|---|---|-----|---|------------------------------------------------|
| 149 | 529.2750  | 1056.5354 | 1056.5312 | 4.02   | 0 | 9 | 10  | 1 | QADGQAGAALR                                    |
| 564 | 863.3917  | 1724.7688 | 1724.7458 | 13.4   | 0 | 9 | 5.5 | 1 | GVSEGSAAMAAGESMAQR + Oxidation (M)             |
| 384 | 738.3768  | 1474.7390 | 1474.8065 | -45.73 | 1 | 9 | 10  | 1 | VESLLENMGIKVK + Oxidation (M)                  |
| 271 | 631.8031  | 1261.5916 | 1261.5826 | 7.15   | 0 | 8 | 9.1 | 1 | EALVDWVSGEK                                    |
| 58  | 412.7545  | 823.4944  | 823.4817  | 15.5   | 0 | 8 | 4   | 1 | RPWLPR                                         |
| 417 | 774.9011  | 1547.7876 | 1547.7865 | 0.76   | 1 | 8 | 10  | 1 | MEEQGLADASLLKK + Oxidation (M)                 |
| 552 | 852.4298  | 1702.8450 | 1702.8825 | -21.99 | 1 | 8 | 9.9 | 1 | TQVGVKGCYAHVLGSK                               |
| 388 | 738.3810  | 1474.7474 | 1474.6787 | 46.6   | 1 | 8 | 12  | 1 | VDTEPKAEESGDK                                  |
| 361 | 711.3162  | 1420.6178 | 1420.6681 | -35.39 | 1 | 8 | 5.1 | 1 | SLSSQEAKEAEDK                                  |
| 268 | 631.3294  | 1260.6442 | 1260.6649 | -16.36 | 0 | 8 | 13  | 1 | LTDPPFRPMLR + Oxidation (M)                    |
| 61  | 419.2105  | 836.4064  | 836.3810  | 30.4   | 1 | 8 | 12  | 1 | QMKGDSR + Oxidation (M)                        |
| 390 | 738.3816  | 1474.7486 | 1474.6787 | 47.4   | 1 | 8 | 12  | 1 | VDTEPKAEESGDK                                  |
| 631 | 656.6597  | 1966.9573 | 1966.9670 | -4.96  | 0 | 8 | 9.3 | 1 | VSVPTHPDDVDASLTMVK                             |
| 63  | 421.7579  | 841.5012  | 841.4810  | 24.0   | 0 | 8 | 9.1 | 1 | AVLTWPR                                        |
| 275 | 634.3516  | 1266.6886 | 1266.7230 | -27.14 | 1 | 8 | 9.1 | 1 | MEPRIKPRPK + Oxidation (M)                     |
| 711 | 916.4344  | 2746.2814 | 2746.2593 | 8.03   | 0 | 8 | 5.8 | 1 | LGVCYVEEPQEKPMPCWLYLR + Oxidation (M)          |
| 103 | 485.7501  | 969.4856  | 969.4477  | 39.1   | 0 | 8 | 9.6 | 1 | TMLEYADK                                       |
| 152 | 530.7871  | 1059.5596 | 1059.5284 | 29.5   | 1 | 8 | 18  | 1 | VWHTMSKR + Oxidation (M)                       |
| 731 | 958.4579  | 2872.3519 | 2872.3337 | 6.31   | 1 | 8 | 6.4 | 1 | TQQETFLEVIANASGYMYETSRYR + Oxidation (M)       |
| 70  | 435.2076  | 868.4006  | 868.4290  | -32.70 | 1 | 8 | 7.8 | 1 | GKFSSTDSK                                      |
| 18  | 531.2912  | 530.2839  | 530.2813  | 5.04   | 0 | 8 | 26  | 1 | AVADR                                          |
| 329 | 672.8435  | 1343.6724 | 1343.6906 | -13.47 | 1 | 8 | 12  | 1 | LASRQSTPSQNR                                   |
| 199 | 573.7952  | 1145.5758 | 1145.5751 | 0.69   | 0 | 8 | 15  | 1 | QMGLEPSPVK                                     |
| 385 | 738.3773  | 1474.7400 | 1474.6787 | 41.6   | 1 | 8 | 13  | 1 | VDTEPKAEESGDK                                  |
| 130 | 519.2655  | 1036.5164 | 1036.4681 | 46.6   | 0 | 8 | 13  | 1 | DPATMLMSR + Oxidation (M)                      |
| 131 | 519.2684  | 1036.5222 | 1036.5739 | -49.84 | 0 | 8 | 13  | 1 | IYCLLSLR                                       |
| 241 | 618.2693  | 1234.5240 | 1234.5677 | -35.37 | 0 | 8 | 5.3 | 1 | STDSEVVSQSPAK                                  |
| 26  | 581.3032  | 580.2959  | 580.2890  | 11.9   | 0 | 8 | 11  | 1 | SSMLK + Oxidation (M)                          |
| 382 | 738.3743  | 1474.7340 | 1474.8065 | -49.12 | 1 | 8 | 13  | 1 | VESLLENMGIKVK + Oxidation (M)                  |
| 36  | 644.3062  | 643.2989  | 643.2748  | 37.5   | 0 | 8 | 5.1 | 1 | GCALSH                                         |
| 209 | 579.2987  | 1156.5828 | 1156.5585 | 21.1   | 1 | 7 | 14  | 1 | AGSEPAGERQR                                    |
| 72  | 435.7737  | 869.5328  | 869.5698  | -42.50 | 1 | 7 | 7.2 | 1 | VLKILR                                         |
| 164 | 539.2836  | 1076.5526 | 1076.5437 | 8.32   | 1 | 7 | 16  | 1 | QGAVMKNWK + Oxidation (M)                      |
| 155 | 532.2737  | 1062.5328 | 1062.5128 | 18.9   | 1 | 7 | 17  | 1 | QEIDRMQK + Oxidation (M)                       |
| 211 | 580.7757  | 1159.5368 | 1159.5581 | -18.36 | 1 | 7 | 11  | 1 | ELQDEGRSAR                                     |
| 356 | 697.3420  | 1392.6694 | 1392.6919 | -16.10 | 0 | 7 | 14  | 1 | MTLTAASEVIGER + Oxidation (M)                  |
| 182 | 556.7426  | 1111.4706 | 1111.4638 | 6.20   | 1 | 7 | 5.5 | 1 | EGMERESMK + Oxidation (M)                      |
| 422 | 785.3591  | 1568.7036 | 1568.7551 | -32.82 | 1 | 7 | 8.8 | 1 | FKYYSFFLDPK                                    |
| 242 | 618.2741  | 1234.5336 | 1234.5910 | -46.49 | 0 | 7 | 8.1 | 1 | MSTARPCAGLR + Oxidation (M)                    |
| 254 | 629.8081  | 1257.6016 | 1257.6248 | -18.41 | 1 | 7 | 15  | 1 | QRMSPGVAGSPR + Oxidation (M)                   |
| 153 | 530.7873  | 1059.5600 | 1059.5560 | 3.79   | 0 | 7 | 23  | 1 | DTSSILATPR                                     |
| 387 | 738.3804  | 1474.7462 | 1474.6908 | 37.6   | 0 | 7 | 16  | 1 | HNLLCLENMTSK + Oxidation (M)                   |
| 751 | 833.1402  | 3328.5317 | 3328.5380 | -1.89  | 0 | 7 | 5.3 | 1 | AMNDIGDYVGSNLEISWLPNLDGLMEGYAR + Oxidation (M) |
| 120 | 516.3018  | 1030.5890 | 1030.5546 | 33.4   | 0 | 7 | 15  | 1 | VDILDIDTK                                      |
| 167 | 544.7650  | 1087.5154 | 1087.5370 | -19.83 | 1 | 6 | 16  | 1 | SADIGARADGR                                    |
| 319 | 670.8413  | 1339.6680 | 1339.7037 | -26.63 | 0 | 6 | 16  | 1 | QQVSPWPVPR                                     |
| 320 | 670.8761  | 1339.7376 | 1339.7459 | -6.19  | 1 | 6 | 13  | 1 | KAELEGVAVTAPR                                  |
| 600 | 915.4284  | 1828.8422 | 1828.9068 | -35.29 | 0 | 6 | 11  | 1 | ASGGSGGVSPALWSEVNR                             |
| 383 | 738.3758  | 1474.7370 | 1474.6908 | 31.4   | 0 | 6 | 17  | 1 | HNLLCLENMTSK + Oxidation (M)                   |
| 710 | 916.4273  | 2746.2601 | 2746.2625 | -0.89  | 1 | 6 | 7.5 | 1 | SSDMTCAPHRPELEMRSYLDVPR                        |
| 118 | 515.7795  | 1029.5444 | 1029.5753 | -30.00 | 1 | 6 | 22  | 1 | QACGVVLRK                                      |
| 59  | 414.2218  | 826.4290  | 826.3933  | 43.2   | 0 | 6 | 13  | 1 | NEQPPSR                                        |
| 611 | 973.5194  | 1945.0242 | 1944.9364 | 45.2   | 1 | 6 | 11  | 1 | VIEAYCTSASFQGGTRK                              |
| 119 | 516.3002  | 1030.5858 | 1030.6321 | -44.87 | 1 | 6 | 16  | 1 | MLLLTLRR + Oxidation (M)                       |
| 407 | 756.8483  | 1511.6820 | 1511.6939 | -7.86  | 1 | 6 | 12  | 1 | YGTSMHERVNR                                    |
| 244 | 618.2772  | 1234.5398 | 1234.5677 | -22.55 | 1 | 6 | 10  | 1 | SELEKDTER                                      |
| 157 | 533.2596  | 1064.5046 | 1064.5251 | -19.18 | 0 | 6 | 17  | 1 | VYGGQLSEGR                                     |
| 19  | 532.2899  | 531.2826  | 531.2653  | 32.7   | 0 | 6 | 37  | 1 | SSNPK                                          |
| 377 | 736.3522  | 1470.6898 | 1470.6517 | 26.0   | 0 | 6 | 13  | 1 | SMSLCNIAMTPSK + 2 Oxidation (M)                |
| 178 | 554.2697  | 1106.5248 | 1106.5754 | -45.66 | 1 | 6 | 18  | 1 | KAVTDAIMSR + Oxidation (M)                     |
| 60  | 414.2234  | 826.4322  | 826.4661  | -40.94 | 0 | 6 | 14  | 1 | VAAPNLSR                                       |
| 608 | 954.8972  | 1907.7798 | 1907.7561 | 12.5   | 1 | 6 | 3.6 | 1 | KMGDDVMACVHDDNGR + 2 Oxidation (M)             |
| 393 | 738.3840  | 1474.7534 | 1474.6908 | 42.5   | 0 | 6 | 19  | 1 | HNLLCLENMTSK + Oxidation (M)                   |
| 86  | 450.2203  | 898.4260  | 898.4621  | -40.09 | 1 | 6 | 12  | 1 | REPGEVGR                                       |
| 135 | 523.2825  | 1044.5504 | 1044.5101 | 38.6   | 1 | 6 | 26  | 1 | KGAAGWEGGGR                                    |
| 359 | 466.8943  | 1397.6611 | 1397.6364 | 17.6   | 1 | 6 | 17  | 1 | DSPKSWFFDNR                                    |
| 180 | 555.2522  | 1108.4898 | 1108.5183 | -25.62 | 1 | 6 | 12  | 1 | ENTSKVEMR + Oxidation (M)                      |
| 156 | 533.2565  | 1064.4984 | 1064.5073 | -8.31  | 0 | 6 | 18  | 1 | NFNICLER                                       |
| 124 | 517.2717  | 1032.5288 | 1032.5200 | 8.58   | 0 | 6 | 24  | 1 | GEVVTAGASSR                                    |
| 322 | 671.3471  | 1340.6796 | 1340.6248 | 40.9   | 0 | 6 | 19  | 1 | YGTEDDPLEVR                                    |
| 692 | 837.3954  | 2509.1644 | 2509.1667 | -0.94  | 1 | 5 | 12  | 1 | TIETEBASPSTESLKSTSSDPGTR                       |
| 111 | 496.2291  | 990.4436  | 990.4077  | 36.3   | 0 | 5 | 15  | 1 | VCSDEPER                                       |
| 672 | 761.7168  | 2282.1286 | 2282.0572 | 31.3   | 1 | 5 | 15  | 1 | HCVSAGEPINPEVMEQWRK + Oxidation (M)            |
| 235 | 615.3110  | 1228.6074 | 1228.6663 | -47.92 | 0 | 5 | 22  | 1 | TIVAVEVQDQK                                    |
| 147 | 529.2686  | 1056.5226 | 1056.5716 | -46.35 | 0 | 5 | 21  | 1 | LPTALWSGGR                                     |
| 318 | 670.3047  | 1338.5948 | 1338.5809 | 10.4   | 0 | 5 | 14  | 1 | GGFGEVCACQVR                                   |
| 328 | 672.8430  | 1343.6714 | 1343.6681 | 2.51   | 1 | 5 | 22  | 1 | AQGDQEAQLKK                                    |
| 106 | 487.7730  | 973.5314  | 973.4950  | 37.5   | 1 | 5 | 32  | 1 | ICPICRR                                        |
| 412 | 766.3771  | 1530.7396 | 1530.7474 | -5.04  | 1 | 5 | 23  | 1 | AADTKHHHSMIQR                                  |
| 743 | 1026.4631 | 3076.3675 | 3076.4223 | -17.83 | 0 | 5 | 6.7 | 1 | PDFISVSEFVAETLEDYMAPTASSFTTR + Oxidation (M)   |
| 617 | 652.0220  | 1953.0442 | 1953.0758 | -16.17 | 0 | 5 | 15  | 1 | QGFCIPVEPGKGLLLTK                              |

|     |           |           |           |        |   |   |     |   |                                                 |
|-----|-----------|-----------|-----------|--------|---|---|-----|---|-------------------------------------------------|
| 137 | 523.7651  | 1045.5156 | 1045.5127 | 2.78   | 1 | 5 | 34  | 1 | FPFVDCRR                                        |
| 30  | 601.3463  | 600.3390  | 600.3595  | -34.10 | 0 | 5 | 26  | 1 | QVINK                                           |
| 643 | 1040.0198 | 2078.0250 | 2078.0895 | -31.01 | 1 | 5 | 19  | 1 | LEVAKLPLTEHELESENK                              |
| 198 | 572.8111  | 1143.6076 | 1143.6546 | -41.07 | 1 | 5 | 31  | 1 | QAMLRQLLR + Oxidation (M)                       |
| 633 | 656.9688  | 1967.8846 | 1967.8417 | 21.8   | 1 | 4 | 13  | 1 | ASETQTSGRGSSASGSGAGDQA                          |
| 406 | 756.8435  | 1511.6724 | 1511.7144 | -27.75 | 0 | 4 | 15  | 1 | EVVESQPFPFGET                                   |
| 87  | 450.2206  | 898.4266  | 898.4192  | 8.34   | 1 | 4 | 17  | 1 | GAHMDRGR                                        |
| 28  | 590.3152  | 589.3079  | 589.3184  | -17.71 | 0 | 4 | 57  | 1 | TLNSR                                           |
| 441 | 785.8559  | 1569.6972 | 1569.7569 | -38.00 | 1 | 4 | 14  | 1 | EMHEEVLNIRR + Oxidation (M)                     |
| 626 | 656.6524  | 1966.9354 | 1966.9758 | -20.53 | 0 | 4 | 20  | 1 | AAFLGTFTVTLQVPCACR                              |
| 577 | 595.3222  | 1782.9448 | 1782.8862 | 32.9   | 0 | 4 | 19  | 1 | MIQGDYIEKPDFALK + Oxidation (M)                 |
| 240 | 616.8068  | 1231.5990 | 1231.6197 | -16.75 | 1 | 4 | 30  | 1 | DLEKNYTPR                                       |
| 588 | 897.9125  | 1793.8104 | 1793.8366 | -14.60 | 1 | 4 | 18  | 1 | QWTDEGVSERMLR                                   |
| 628 | 656.6563  | 1966.9471 | 1966.9670 | -10.14 | 0 | 4 | 23  | 1 | VSVFTHPDVGDASLTMVK                              |
| 117 | 514.2878  | 1026.5610 | 1026.5763 | -14.88 | 0 | 4 | 25  | 1 | WVFLIGHR                                        |
| 121 | 516.3024  | 1030.5902 | 1030.6209 | -29.74 | 0 | 4 | 28  | 1 | VLVIVMTTR                                       |
| 78  | 438.7511  | 875.4876  | 875.5076  | -22.79 | 1 | 4 | 35  | 1 | SLSSKLNK                                        |
| 371 | 730.9055  | 1459.7964 | 1459.7592 | 25.5   | 1 | 4 | 24  | 1 | DVLEKEMELLDQK                                   |
| 429 | 785.8380  | 1569.6614 | 1569.6837 | -14.19 | 0 | 4 | 9.6 | 1 | VTDVMLCAGEMSGGK + Oxidation (M)                 |
| 435 | 785.8458  | 1569.6770 | 1569.7232 | -29.41 | 0 | 4 | 13  | 1 | LAGEEELAFSTK + Oxidation (M)                    |
| 110 | 496.2278  | 990.4410  | 990.4804  | -39.74 | 0 | 4 | 21  | 1 | LEDQALR + Oxidation (M)                         |
| 34  | 630.3195  | 629.3122  | 629.3133  | -1.70  | 0 | 3 | 18  | 1 | SDGVPR                                          |
| 109 | 496.2252  | 990.4358  | 990.4744  | -38.89 | 0 | 3 | 20  | 1 | LGGNHSNHR                                       |
| 527 | 849.4228  | 1696.8310 | 1696.8818 | -29.91 | 1 | 3 | 29  | 1 | AFLGELKQMTSTVR + Oxidation (M)                  |
| 93  | 458.7181  | 915.4216  | 915.3974  | 26.5   | 0 | 3 | 21  | 1 | SSWSYSL                                         |
| 215 | 581.7887  | 1161.5628 | 1161.5448 | 15.5   | 0 | 3 | 41  | 1 | MEEQTQQR                                        |
| 550 | 852.4276  | 1702.8406 | 1702.8825 | -24.57 | 1 | 3 | 30  | 1 | TQVGVKGCYAHVLGSK                                |
| 630 | 656.6592  | 1966.9558 | 1966.9418 | 7.11   | 1 | 3 | 27  | 1 | ALQEFSELNERMSELR + Oxidation (M)                |
| 669 | 737.6966  | 2210.0680 | 2210.0776 | -4.37  | 1 | 3 | 24  | 1 | TNSMSFLPVVKEAEBSVVK                             |
| 745 | 801.6301  | 3202.4913 | 3202.5964 | -32.82 | 1 | 3 | 13  | 1 | TVCYSPEDGMVAIGMKNGEFIILLVSSLK + 2 Oxidation (M) |
| 459 | 801.4326  | 1600.8506 | 1600.8243 | 16.5   | 1 | 3 | 27  | 1 | CHLKLSDLNLSSSK                                  |
| 327 | 672.8421  | 1343.6696 | 1343.7045 | -25.91 | 1 | 3 | 33  | 1 | KEASSGSTPQPKP                                   |
| 181 | 556.2957  | 1110.5768 | 1110.6033 | -23.83 | 0 | 3 | 32  | 1 | TVISPPNLR                                       |
| 629 | 656.6565  | 1966.9477 | 1966.9385 | 4.67   | 0 | 3 | 28  | 1 | ASLVSSSDGSLADTHFAR                              |
| 267 | 631.3170  | 1260.6194 | 1260.5775 | 33.3   | 0 | 3 | 39  | 1 | FYETVQDFR                                       |
| 276 | 634.3563  | 1266.6980 | 1266.6720 | 20.5   | 1 | 3 | 25  | 1 | RNIIGYFEQK                                      |
| 238 | 616.8051  | 1231.5956 | 1231.6561 | -49.04 | 1 | 3 | 38  | 1 | AKALESQFPNK                                     |
| 673 | 762.0465  | 2283.1177 | 2283.0550 | 27.5   | 1 | 3 | 27  | 1 | AVDSACEPLTGSSGGPGSREPPR                         |
| 591 | 897.9169  | 1793.8192 | 1793.7699 | 27.5   | 1 | 3 | 28  | 1 | MSYLKTTMEDEESSK + Oxidation (M)                 |
| 68  | 428.7694  | 855.5242  | 855.5178  | 7.55   | 0 | 2 | 25  | 1 | VTIASLPR                                        |
| 670 | 737.6982  | 2210.0728 | 2209.9984 | 33.7   | 1 | 2 | 28  | 1 | RMLSDSGMITPHYEDSDLK + Oxidation (M)             |
| 228 | 601.7988  | 1201.5830 | 1201.5952 | -10.14 | 1 | 2 | 41  | 1 | TPRSFSTHGR                                      |
| 239 | 616.8063  | 1231.5980 | 1231.5768 | 17.3   | 1 | 2 | 44  | 1 | HNGYDPRVMK + Oxidation (M)                      |
| 574 | 890.4332  | 1778.8518 | 1778.8010 | 28.6   | 1 | 2 | 36  | 1 | MVMTVFACLGRGMK + 3 Oxidation (M)                |
| 195 | 572.8048  | 1143.5950 | 1143.5924 | 2.32   | 0 | 2 | 51  | 1 | NILYHLDEK                                       |
| 693 | 837.3973  | 2509.1701 | 2509.2531 | -33.11 | 0 | 2 | 24  | 1 | MVQSLAWAGVMTLLMVQWGSAAK + 2 Oxidation (M)       |
| 188 | 565.3242  | 1128.6338 | 1128.6502 | -14.52 | 1 | 2 | 43  | 1 | KLELEATVAR                                      |
| 570 | 885.9603  | 1769.9060 | 1769.9635 | -32.47 | 1 | 2 | 38  | 1 | ENQRQEQLSLTAK                                   |
| 99  | 475.7538  | 949.4930  | 949.4869  | 6.48   | 0 | 2 | 52  | 1 | IGDTIEFR                                        |
| 620 | 652.3461  | 1954.0165 | 1954.0023 | 7.27   | 1 | 2 | 33  | 1 | AVVGVDFPHFSYMKLTK + Oxidation (M)               |
| 339 | 458.9060  | 1373.6962 | 1373.6688 | 20.0   | 1 | 2 | 50  | 1 | QWRNISDNDK                                      |
| 528 | 851.4495  | 1700.8844 | 1700.8920 | -4.41  | 1 | 2 | 38  | 1 | DKDTLSIHYLMLPR                                  |
| 639 | 1039.9996 | 2077.9846 | 2077.9132 | 34.4   | 0 | 2 | 32  | 1 | CPNGHIYVITECGAMQR + Oxidation (M)               |
| 148 | 529.2691  | 1056.5236 | 1056.5426 | -17.95 | 0 | 2 | 42  | 1 | LMTELWHK                                        |
| 704 | 894.0798  | 2679.2176 | 2679.3439 | -47.13 | 1 | 2 | 20  | 1 | EMLLKHPSRVQVFEAEDNLPDR                          |
| 451 | 795.8800  | 1589.7454 | 1589.7508 | -3.35  | 0 | 2 | 36  | 1 | QASDSSMFLPPSPAR                                 |
| 365 | 728.3507  | 1454.6868 | 1454.7365 | -34.13 | 0 | 2 | 37  | 1 | EQISQHIADLSSK                                   |
| 638 | 688.3139  | 2061.9199 | 2061.9426 | -11.01 | 1 | 2 | 24  | 1 | SKGSQGTSPFPSPSPSPSDR + Oxidation (M)            |
| 590 | 897.9169  | 1793.8192 | 1793.7699 | 27.5   | 1 | 2 | 34  | 1 | MSYLKTTMEDEESSK + Oxidation (M)                 |
| 555 | 854.3911  | 1706.7676 | 1706.7794 | -6.91  | 1 | 2 | 30  | 1 | MNSFRANHSSLDNSK                                 |
| 190 | 572.3210  | 1142.6274 | 1142.6448 | -15.16 | 0 | 2 | 54  | 1 | AALLDPFAVR                                      |
| 625 | 656.6497  | 1966.9273 | 1966.9418 | -7.41  | 0 | 2 | 34  | 1 | SCSVTDTVAEQAHLPFGAK                             |
| 667 | 1073.0267 | 2144.0388 | 2144.0911 | -24.36 | 1 | 2 | 37  | 1 | SLSAFAPICNVLCPWGKK                              |
| 179 | 554.2782  | 1106.5418 | 1106.5581 | -14.68 | 1 | 2 | 56  | 1 | QSFQRQAQR                                       |
| 439 | 785.8525  | 1569.6904 | 1569.6671 | 14.9   | 0 | 1 | 26  | 1 | EDTGWYWCIGQR                                    |
| 516 | 824.3876  | 1646.7606 | 1646.8055 | -27.22 | 1 | 1 | 41  | 1 | GLRTLCCCLPIER                                   |
| 535 | 851.4545  | 1700.8944 | 1700.8920 | 1.46   | 1 | 1 | 42  | 1 | NPKILVECLTPDFR                                  |
| 715 | 917.0835  | 2748.2287 | 2748.3371 | -39.44 | 1 | 1 | 19  | 1 | RPTLTGCSLPGASCGRCPAGVPPAR                       |
| 732 | 958.4640  | 2872.3702 | 2872.2763 | 32.7   | 0 | 1 | 29  | 1 | ASQSVDFDGDSDMNNWYQKQPPK + Oxidation (M)         |
| 556 | 854.3937  | 1706.7728 | 1706.7794 | -3.86  | 1 | 1 | 36  | 1 | MNSFRANHSSLDNSK                                 |
| 607 | 624.3091  | 1869.9055 | 1869.8349 | 37.7   | 0 | 1 | 48  | 1 | FPCNGNSQAGLTTQTMK + Oxidation (M)               |
| 627 | 656.6545  | 1966.9417 | 1967.0323 | -46.10 | 1 | 1 | 41  | 1 | LGSSSLTSIPEVREHVK                               |
| 138 | 525.2727  | 1048.5308 | 1048.5263 | 4.33   | 0 | 1 | 76  | 1 | GIDMIEFPK                                       |
| 40  | 325.1874  | 648.3602  | 648.3595  | 1.16   | 0 | 1 | 49  | 1 | AFNAVK                                          |
| 423 | 785.8161  | 1569.6176 | 1569.6518 | -21.76 | 0 | 1 | 7.1 | 1 | DVTCDVHYENYR                                    |
| 321 | 671.3409  | 1340.6672 | 1340.7201 | -39.40 | 1 | 1 | 57  | 1 | SLSRTPSPPPFR                                    |
| 378 | 736.4106  | 1470.8066 | 1470.7943 | 8.40   | 0 | 1 | 43  | 1 | QVLSQGSYLYHR                                    |
| 100 | 476.7474  | 951.4802  | 951.5178  | -39.46 | 1 | 1 | 65  | 1 | RLFIGSYF                                        |
| 656 | 1048.9799 | 2095.9452 | 2095.9844 | -18.70 | 0 | 1 | 34  | 1 | TPEVQSILMSSFGNQDTR                              |
| 467 | 805.8967  | 1609.7788 | 1609.7592 | 12.2   | 1 | 1 | 53  | 1 | TIDSWMNTMVPKR + 2 Oxidation (M)                 |
| 729 | 958.1341  | 2871.3805 | 2871.4628 | -28.66 | 1 | 1 | 31  | 1 | GFSQSGAPLLTLQSVRLQFQETDGRH                      |

|                                     |                     |           |           |           |        |   |   |    |   |                                          |
|-------------------------------------|---------------------|-----------|-----------|-----------|--------|---|---|----|---|------------------------------------------|
| <input checked="" type="checkbox"/> | <a href="#">39</a>  | 325.1860  | 648.3574  | 648.3629  | -8.36  | 1 | 1 | 67 | 1 | GLGMKK + Oxidation (M)                   |
| <input checked="" type="checkbox"/> | <a href="#">680</a> | 785.4049  | 2353.1929 | 2353.2715 | -33.42 | 1 | 0 | 40 | 1 | IVKYLALQDLMLLSQYSPSR + Oxidation (M)     |
| <input checked="" type="checkbox"/> | <a href="#">37</a>  | 325.1857  | 648.3568  | 648.3629  | -9.29  | 1 | 0 | 71 | 1 | GLGMKK + Oxidation (M)                   |
| <input checked="" type="checkbox"/> | <a href="#">85</a>  | 449.2170  | 896.4194  | 896.4538  | -38.32 | 1 | 0 | 46 | 1 | GYTMAAKR                                 |
| <input checked="" type="checkbox"/> | <a href="#">734</a> | 963.4579  | 2887.3519 | 2887.4327 | -27.99 | 0 | 0 | 33 | 1 | FLTNMTITNDYQHLLVNSIANFFR + Oxidation (M) |
| <input checked="" type="checkbox"/> | <a href="#">306</a> | 657.3536  | 1312.6926 | 1312.7099 | -13.15 | 1 | 0 | 69 | 1 | ADVKTTPGGTALQR                           |
| <input checked="" type="checkbox"/> | <a href="#">1</a>   | 366.9022  | 365.8949  |           |        |   |   |    |   |                                          |
| <input checked="" type="checkbox"/> | <a href="#">2</a>   | 396.9575  | 395.9502  |           |        |   |   |    |   |                                          |
| <input checked="" type="checkbox"/> | <a href="#">3</a>   | 416.2356  | 415.2283  |           |        |   |   |    |   |                                          |
| <input checked="" type="checkbox"/> | <a href="#">4</a>   | 416.2481  | 415.2408  |           |        |   |   |    |   |                                          |
| <input checked="" type="checkbox"/> | <a href="#">5</a>   | 423.2329  | 422.2256  |           |        |   |   |    |   |                                          |
| <input checked="" type="checkbox"/> | <a href="#">6</a>   | 431.2560  | 430.2487  |           |        |   |   |    |   |                                          |
| <input checked="" type="checkbox"/> | <a href="#">7</a>   | 435.2127  | 434.2054  |           |        |   |   |    |   |                                          |
| <input checked="" type="checkbox"/> | <a href="#">8</a>   | 435.2151  | 434.2078  |           |        |   |   |    |   |                                          |
| <input checked="" type="checkbox"/> | <a href="#">9</a>   | 445.1303  | 444.1230  |           |        |   |   |    |   |                                          |
| <input checked="" type="checkbox"/> | <a href="#">10</a>  | 445.2416  | 444.2343  |           |        |   |   |    |   |                                          |
| <input checked="" type="checkbox"/> | <a href="#">11</a>  | 446.2505  | 445.2432  |           |        |   |   |    |   |                                          |
| <input checked="" type="checkbox"/> | <a href="#">12</a>  | 446.2646  | 445.2573  |           |        |   |   |    |   |                                          |
| <input checked="" type="checkbox"/> | <a href="#">14</a>  | 476.2701  | 475.2628  |           |        |   |   |    |   |                                          |
| <input checked="" type="checkbox"/> | <a href="#">15</a>  | 487.1823  | 486.1750  |           |        |   |   |    |   |                                          |
| <input checked="" type="checkbox"/> | <a href="#">16</a>  | 490.2626  | 489.2553  |           |        |   |   |    |   |                                          |
| <input checked="" type="checkbox"/> | <a href="#">17</a>  | 503.1149  | 502.1076  |           |        |   |   |    |   |                                          |
| <input checked="" type="checkbox"/> | <a href="#">20</a>  | 545.2539  | 544.2466  |           |        |   |   |    |   |                                          |
| <input checked="" type="checkbox"/> | <a href="#">21</a>  | 545.2953  | 544.2880  |           |        |   |   |    |   |                                          |
| <input checked="" type="checkbox"/> | <a href="#">22</a>  | 554.3151  | 553.3078  |           |        |   |   |    |   |                                          |
| <input checked="" type="checkbox"/> | <a href="#">23</a>  | 558.3015  | 557.2942  |           |        |   |   |    |   |                                          |
| <input checked="" type="checkbox"/> | <a href="#">24</a>  | 573.3213  | 572.3140  |           |        |   |   |    |   |                                          |
| <input checked="" type="checkbox"/> | <a href="#">29</a>  | 600.3272  | 599.3199  |           |        |   |   |    |   |                                          |
| <input checked="" type="checkbox"/> | <a href="#">31</a>  | 615.3143  | 614.3070  |           |        |   |   |    |   |                                          |
| <input checked="" type="checkbox"/> | <a href="#">32</a>  | 624.3177  | 623.3104  |           |        |   |   |    |   |                                          |
| <input checked="" type="checkbox"/> | <a href="#">33</a>  | 624.8013  | 623.7940  |           |        |   |   |    |   |                                          |
| <input checked="" type="checkbox"/> | <a href="#">35</a>  | 632.3370  | 631.3297  |           |        |   |   |    |   |                                          |
| <input checked="" type="checkbox"/> | <a href="#">38</a>  | 325.1857  | 648.3568  |           |        |   |   |    |   |                                          |
| <input checked="" type="checkbox"/> | <a href="#">42</a>  | 677.1953  | 676.1880  |           |        |   |   |    |   |                                          |
| <input checked="" type="checkbox"/> | <a href="#">43</a>  | 691.3529  | 690.3456  |           |        |   |   |    |   |                                          |
| <input checked="" type="checkbox"/> | <a href="#">44</a>  | 698.3786  | 697.3713  |           |        |   |   |    |   |                                          |
| <input checked="" type="checkbox"/> | <a href="#">45</a>  | 717.7251  | 716.7178  |           |        |   |   |    |   |                                          |
| <input checked="" type="checkbox"/> | <a href="#">46</a>  | 719.3228  | 718.3155  |           |        |   |   |    |   |                                          |
| <input checked="" type="checkbox"/> | <a href="#">47</a>  | 736.4116  | 735.4043  |           |        |   |   |    |   |                                          |
| <input checked="" type="checkbox"/> | <a href="#">48</a>  | 753.3764  | 752.3691  |           |        |   |   |    |   |                                          |
| <input checked="" type="checkbox"/> | <a href="#">50</a>  | 768.3764  | 767.3691  |           |        |   |   |    |   |                                          |
| <input checked="" type="checkbox"/> | <a href="#">51</a>  | 786.3768  | 785.3695  |           |        |   |   |    |   |                                          |
| <input checked="" type="checkbox"/> | <a href="#">52</a>  | 396.7395  | 791.4644  |           |        |   |   |    |   |                                          |
| <input checked="" type="checkbox"/> | <a href="#">53</a>  | 805.4037  | 804.3964  |           |        |   |   |    |   |                                          |
| <input checked="" type="checkbox"/> | <a href="#">54</a>  | 808.4230  | 807.4157  |           |        |   |   |    |   |                                          |
| <input checked="" type="checkbox"/> | <a href="#">64</a>  | 846.4410  | 845.4337  |           |        |   |   |    |   |                                          |
| <input checked="" type="checkbox"/> | <a href="#">75</a>  | 435.7748  | 869.5350  |           |        |   |   |    |   |                                          |
| <input checked="" type="checkbox"/> | <a href="#">76</a>  | 872.4955  | 871.4882  |           |        |   |   |    |   |                                          |
| <input checked="" type="checkbox"/> | <a href="#">81</a>  | 885.8868  | 884.8795  |           |        |   |   |    |   |                                          |
| <input checked="" type="checkbox"/> | <a href="#">83</a>  | 892.4476  | 891.4403  |           |        |   |   |    |   |                                          |
| <input checked="" type="checkbox"/> | <a href="#">88</a>  | 450.7097  | 899.4048  |           |        |   |   |    |   |                                          |
| <input checked="" type="checkbox"/> | <a href="#">91</a>  | 452.7321  | 903.4496  |           |        |   |   |    |   |                                          |
| <input checked="" type="checkbox"/> | <a href="#">92</a>  | 452.7397  | 903.4648  |           |        |   |   |    |   |                                          |
| <input checked="" type="checkbox"/> | <a href="#">95</a>  | 920.4788  | 919.4715  |           |        |   |   |    |   |                                          |
| <input checked="" type="checkbox"/> | <a href="#">96</a>  | 920.5129  | 919.5056  |           |        |   |   |    |   |                                          |
| <input checked="" type="checkbox"/> | <a href="#">98</a>  | 929.5637  | 928.5564  |           |        |   |   |    |   |                                          |
| <input checked="" type="checkbox"/> | <a href="#">101</a> | 482.2186  | 962.4226  |           |        |   |   |    |   |                                          |
| <input checked="" type="checkbox"/> | <a href="#">107</a> | 978.5477  | 977.5404  |           |        |   |   |    |   |                                          |
| <input checked="" type="checkbox"/> | <a href="#">108</a> | 491.7354  | 981.4562  |           |        |   |   |    |   |                                          |
| <input checked="" type="checkbox"/> | <a href="#">115</a> | 505.7493  | 1009.4840 |           |        |   |   |    |   |                                          |
| <input checked="" type="checkbox"/> | <a href="#">129</a> | 519.1622  | 1036.3098 |           |        |   |   |    |   |                                          |
| <input checked="" type="checkbox"/> | <a href="#">145</a> | 529.2667  | 1056.5188 |           |        |   |   |    |   |                                          |
| <input checked="" type="checkbox"/> | <a href="#">151</a> | 530.2933  | 1058.5720 |           |        |   |   |    |   |                                          |
| <input checked="" type="checkbox"/> | <a href="#">161</a> | 539.2780  | 1076.5414 |           |        |   |   |    |   |                                          |
| <input checked="" type="checkbox"/> | <a href="#">174</a> | 552.2900  | 1102.5654 |           |        |   |   |    |   |                                          |
| <input checked="" type="checkbox"/> | <a href="#">186</a> | 563.3021  | 1124.5896 |           |        |   |   |    |   |                                          |
| <input checked="" type="checkbox"/> | <a href="#">187</a> | 565.2789  | 1128.5432 |           |        |   |   |    |   |                                          |
| <input checked="" type="checkbox"/> | <a href="#">200</a> | 574.3109  | 1146.6072 |           |        |   |   |    |   |                                          |
| <input checked="" type="checkbox"/> | <a href="#">203</a> | 574.3262  | 1146.6378 |           |        |   |   |    |   |                                          |
| <input checked="" type="checkbox"/> | <a href="#">220</a> | 587.8072  | 1173.5998 |           |        |   |   |    |   |                                          |
| <input checked="" type="checkbox"/> | <a href="#">221</a> | 588.3449  | 1174.6752 |           |        |   |   |    |   |                                          |
| <input checked="" type="checkbox"/> | <a href="#">225</a> | 595.3173  | 1188.6200 |           |        |   |   |    |   |                                          |
| <input checked="" type="checkbox"/> | <a href="#">226</a> | 1190.5615 | 1189.5542 |           |        |   |   |    |   |                                          |
| <input checked="" type="checkbox"/> | <a href="#">232</a> | 615.3006  | 1228.5866 |           |        |   |   |    |   |                                          |
| <input checked="" type="checkbox"/> | <a href="#">233</a> | 615.3041  | 1228.5936 |           |        |   |   |    |   |                                          |
| <input checked="" type="checkbox"/> | <a href="#">234</a> | 615.3063  | 1228.5980 |           |        |   |   |    |   |                                          |
| <input checked="" type="checkbox"/> | <a href="#">243</a> | 618.2758  | 1234.5370 |           |        |   |   |    |   |                                          |
| <input checked="" type="checkbox"/> | <a href="#">248</a> | 622.8178  | 1243.6210 |           |        |   |   |    |   |                                          |
| <input checked="" type="checkbox"/> | <a href="#">253</a> | 629.3243  | 1256.6340 |           |        |   |   |    |   |                                          |
| <input checked="" type="checkbox"/> | <a href="#">255</a> | 631.2940  | 1260.5734 |           |        |   |   |    |   |                                          |
| <input checked="" type="checkbox"/> | <a href="#">272</a> | 632.3372  | 1262.6598 |           |        |   |   |    |   |                                          |

|                                     |                     |          |           |
|-------------------------------------|---------------------|----------|-----------|
| <input checked="" type="checkbox"/> | <a href="#">278</a> | 638.8154 | 1275.6162 |
| <input checked="" type="checkbox"/> | <a href="#">284</a> | 643.7996 | 1285.5846 |
| <input checked="" type="checkbox"/> | <a href="#">285</a> | 646.8150 | 1291.6154 |
| <input checked="" type="checkbox"/> | <a href="#">287</a> | 648.3736 | 1294.7326 |
| <input checked="" type="checkbox"/> | <a href="#">307</a> | 660.3164 | 1318.6182 |
| <input checked="" type="checkbox"/> | <a href="#">326</a> | 672.8339 | 1343.6532 |
| <input checked="" type="checkbox"/> | <a href="#">344</a> | 692.3312 | 1382.6478 |
| <input checked="" type="checkbox"/> | <a href="#">349</a> | 692.8626 | 1383.7106 |
| <input checked="" type="checkbox"/> | <a href="#">350</a> | 692.8760 | 1383.7374 |
| <input checked="" type="checkbox"/> | <a href="#">351</a> | 692.8798 | 1383.7450 |
| <input checked="" type="checkbox"/> | <a href="#">352</a> | 693.8698 | 1385.7250 |
| <input checked="" type="checkbox"/> | <a href="#">364</a> | 726.3497 | 1450.6848 |
| <input checked="" type="checkbox"/> | <a href="#">366</a> | 728.8524 | 1455.6902 |
| <input checked="" type="checkbox"/> | <a href="#">367</a> | 730.8618 | 1459.7090 |
| <input checked="" type="checkbox"/> | <a href="#">379</a> | 736.8534 | 1471.6922 |
| <input checked="" type="checkbox"/> | <a href="#">381</a> | 738.3735 | 1474.7324 |
| <input checked="" type="checkbox"/> | <a href="#">386</a> | 738.3793 | 1474.7440 |
| <input checked="" type="checkbox"/> | <a href="#">389</a> | 738.3812 | 1474.7478 |
| <input checked="" type="checkbox"/> | <a href="#">394</a> | 738.3854 | 1474.7562 |
| <input checked="" type="checkbox"/> | <a href="#">400</a> | 740.3684 | 1478.7222 |
| <input checked="" type="checkbox"/> | <a href="#">401</a> | 740.3709 | 1478.7272 |
| <input checked="" type="checkbox"/> | <a href="#">402</a> | 745.8734 | 1489.7322 |
| <input checked="" type="checkbox"/> | <a href="#">403</a> | 746.8355 | 1491.6564 |
| <input checked="" type="checkbox"/> | <a href="#">404</a> | 748.8627 | 1495.7108 |
| <input checked="" type="checkbox"/> | <a href="#">408</a> | 756.8687 | 1511.7228 |
| <input checked="" type="checkbox"/> | <a href="#">409</a> | 757.8530 | 1513.6914 |
| <input checked="" type="checkbox"/> | <a href="#">410</a> | 757.8616 | 1513.7086 |
| <input checked="" type="checkbox"/> | <a href="#">411</a> | 760.8881 | 1519.7616 |
| <input checked="" type="checkbox"/> | <a href="#">413</a> | 766.8620 | 1531.7094 |
| <input checked="" type="checkbox"/> | <a href="#">414</a> | 766.8657 | 1531.7168 |
| <input checked="" type="checkbox"/> | <a href="#">415</a> | 768.3747 | 1534.7348 |
| <input checked="" type="checkbox"/> | <a href="#">416</a> | 770.3876 | 1538.7606 |
| <input checked="" type="checkbox"/> | <a href="#">418</a> | 775.8670 | 1549.7194 |
| <input checked="" type="checkbox"/> | <a href="#">419</a> | 775.8695 | 1549.7244 |
| <input checked="" type="checkbox"/> | <a href="#">420</a> | 776.3786 | 1550.7426 |
| <input checked="" type="checkbox"/> | <a href="#">421</a> | 784.3751 | 1566.7356 |
| <input checked="" type="checkbox"/> | <a href="#">424</a> | 785.8351 | 1569.6556 |
| <input checked="" type="checkbox"/> | <a href="#">425</a> | 785.8369 | 1569.6592 |
| <input checked="" type="checkbox"/> | <a href="#">426</a> | 785.8369 | 1569.6592 |
| <input checked="" type="checkbox"/> | <a href="#">427</a> | 785.8372 | 1569.6598 |
| <input checked="" type="checkbox"/> | <a href="#">428</a> | 785.8378 | 1569.6610 |
| <input checked="" type="checkbox"/> | <a href="#">430</a> | 785.8421 | 1569.6696 |
| <input checked="" type="checkbox"/> | <a href="#">432</a> | 785.8441 | 1569.6736 |
| <input checked="" type="checkbox"/> | <a href="#">433</a> | 785.8449 | 1569.6752 |
| <input checked="" type="checkbox"/> | <a href="#">434</a> | 785.8456 | 1569.6766 |
| <input checked="" type="checkbox"/> | <a href="#">436</a> | 785.8458 | 1569.6770 |
| <input checked="" type="checkbox"/> | <a href="#">438</a> | 785.8497 | 1569.6848 |
| <input checked="" type="checkbox"/> | <a href="#">440</a> | 785.8525 | 1569.6904 |
| <input checked="" type="checkbox"/> | <a href="#">442</a> | 785.8585 | 1569.7024 |
| <input checked="" type="checkbox"/> | <a href="#">443</a> | 785.8590 | 1569.7034 |
| <input checked="" type="checkbox"/> | <a href="#">444</a> | 786.8485 | 1571.6824 |
| <input checked="" type="checkbox"/> | <a href="#">445</a> | 786.8568 | 1571.6990 |
| <input checked="" type="checkbox"/> | <a href="#">446</a> | 793.4191 | 1584.8236 |
| <input checked="" type="checkbox"/> | <a href="#">447</a> | 794.3834 | 1586.7522 |
| <input checked="" type="checkbox"/> | <a href="#">448</a> | 794.8438 | 1587.6730 |
| <input checked="" type="checkbox"/> | <a href="#">449</a> | 794.8445 | 1587.6744 |
| <input checked="" type="checkbox"/> | <a href="#">450</a> | 794.8522 | 1587.6898 |
| <input checked="" type="checkbox"/> | <a href="#">452</a> | 795.8813 | 1589.7480 |
| <input checked="" type="checkbox"/> | <a href="#">453</a> | 795.8821 | 1589.7496 |
| <input checked="" type="checkbox"/> | <a href="#">460</a> | 801.9117 | 1601.8088 |
| <input checked="" type="checkbox"/> | <a href="#">461</a> | 801.9121 | 1601.8096 |
| <input checked="" type="checkbox"/> | <a href="#">472</a> | 808.9174 | 1615.8202 |
| <input checked="" type="checkbox"/> | <a href="#">473</a> | 808.9254 | 1615.8362 |
| <input checked="" type="checkbox"/> | <a href="#">474</a> | 808.9262 | 1615.8378 |
| <input checked="" type="checkbox"/> | <a href="#">482</a> | 810.8880 | 1619.7614 |
| <input checked="" type="checkbox"/> | <a href="#">483</a> | 810.8907 | 1619.7668 |
| <input checked="" type="checkbox"/> | <a href="#">484</a> | 810.8946 | 1619.7746 |
| <input checked="" type="checkbox"/> | <a href="#">485</a> | 811.3986 | 1620.7826 |
| <input checked="" type="checkbox"/> | <a href="#">486</a> | 814.3635 | 1626.7124 |
| <input checked="" type="checkbox"/> | <a href="#">497</a> | 816.8936 | 1631.7726 |
| <input checked="" type="checkbox"/> | <a href="#">499</a> | 816.8942 | 1631.7738 |
| <input checked="" type="checkbox"/> | <a href="#">502</a> | 816.8950 | 1631.7754 |
| <input checked="" type="checkbox"/> | <a href="#">514</a> | 816.9001 | 1631.7856 |
| <input checked="" type="checkbox"/> | <a href="#">515</a> | 816.9039 | 1631.7932 |
| <input checked="" type="checkbox"/> | <a href="#">525</a> | 846.9399 | 1691.8652 |
| <input checked="" type="checkbox"/> | <a href="#">531</a> | 851.4514 | 1700.8882 |
| <input checked="" type="checkbox"/> | <a href="#">538</a> | 851.4555 | 1700.8964 |
| <input checked="" type="checkbox"/> | <a href="#">549</a> | 852.4240 | 1702.8334 |
| <input checked="" type="checkbox"/> | <a href="#">551</a> | 852.4293 | 1702.8440 |
| <input checked="" type="checkbox"/> | <a href="#">553</a> | 853.9323 | 1705.8500 |
| <input checked="" type="checkbox"/> | <a href="#">554</a> | 854.3732 | 1706.7318 |

|                                     |                     |           |           |
|-------------------------------------|---------------------|-----------|-----------|
| <input checked="" type="checkbox"/> | <a href="#">557</a> | 854.4129  | 1706.8112 |
| <input checked="" type="checkbox"/> | <a href="#">563</a> | 858.4524  | 1714.8902 |
| <input checked="" type="checkbox"/> | <a href="#">565</a> | 863.4109  | 1724.8072 |
| <input checked="" type="checkbox"/> | <a href="#">566</a> | 870.8540  | 1739.6934 |
| <input checked="" type="checkbox"/> | <a href="#">567</a> | 870.8572  | 1739.6998 |
| <input checked="" type="checkbox"/> | <a href="#">568</a> | 870.8726  | 1739.7306 |
| <input checked="" type="checkbox"/> | <a href="#">569</a> | 883.4468  | 1764.8790 |
| <input checked="" type="checkbox"/> | <a href="#">571</a> | 886.9477  | 1771.8808 |
| <input checked="" type="checkbox"/> | <a href="#">572</a> | 890.4144  | 1778.8142 |
| <input checked="" type="checkbox"/> | <a href="#">575</a> | 595.3120  | 1782.9142 |
| <input checked="" type="checkbox"/> | <a href="#">576</a> | 595.3168  | 1782.9286 |
| <input checked="" type="checkbox"/> | <a href="#">586</a> | 896.3635  | 1790.7124 |
| <input checked="" type="checkbox"/> | <a href="#">587</a> | 896.3699  | 1790.7252 |
| <input checked="" type="checkbox"/> | <a href="#">589</a> | 897.9144  | 1793.8142 |
| <input checked="" type="checkbox"/> | <a href="#">592</a> | 904.9169  | 1807.8192 |
| <input checked="" type="checkbox"/> | <a href="#">593</a> | 906.4688  | 1810.9230 |
| <input checked="" type="checkbox"/> | <a href="#">594</a> | 906.4699  | 1810.9252 |
| <input checked="" type="checkbox"/> | <a href="#">599</a> | 913.0020  | 1823.9894 |
| <input checked="" type="checkbox"/> | <a href="#">605</a> | 920.9665  | 1839.9184 |
| <input checked="" type="checkbox"/> | <a href="#">606</a> | 930.0057  | 1857.9968 |
| <input checked="" type="checkbox"/> | <a href="#">609</a> | 954.9168  | 1907.8190 |
| <input checked="" type="checkbox"/> | <a href="#">610</a> | 973.5134  | 1945.0122 |
| <input checked="" type="checkbox"/> | <a href="#">612</a> | 650.9512  | 1949.8318 |
| <input checked="" type="checkbox"/> | <a href="#">619</a> | 652.0237  | 1953.0493 |
| <input checked="" type="checkbox"/> | <a href="#">634</a> | 1003.5219 | 2005.0292 |
| <input checked="" type="checkbox"/> | <a href="#">636</a> | 1004.9890 | 2007.9634 |
| <input checked="" type="checkbox"/> | <a href="#">637</a> | 1024.5085 | 2047.0024 |
| <input checked="" type="checkbox"/> | <a href="#">641</a> | 1040.0059 | 2077.9972 |
| <input checked="" type="checkbox"/> | <a href="#">642</a> | 1040.0195 | 2078.0244 |
| <input checked="" type="checkbox"/> | <a href="#">644</a> | 1040.5087 | 2079.0028 |
| <input checked="" type="checkbox"/> | <a href="#">645</a> | 1040.5095 | 2079.0044 |
| <input checked="" type="checkbox"/> | <a href="#">657</a> | 701.6409  | 2101.9009 |
| <input checked="" type="checkbox"/> | <a href="#">658</a> | 1057.0076 | 2112.0006 |
| <input checked="" type="checkbox"/> | <a href="#">659</a> | 707.3395  | 2118.9967 |
| <input checked="" type="checkbox"/> | <a href="#">660</a> | 707.6843  | 2120.0311 |
| <input checked="" type="checkbox"/> | <a href="#">661</a> | 1062.4869 | 2122.9592 |
| <input checked="" type="checkbox"/> | <a href="#">666</a> | 1073.0200 | 2144.0254 |
| <input checked="" type="checkbox"/> | <a href="#">668</a> | 1098.0914 | 2194.1682 |
| <input checked="" type="checkbox"/> | <a href="#">671</a> | 737.7042  | 2210.0908 |
| <input checked="" type="checkbox"/> | <a href="#">674</a> | 779.0428  | 2334.1066 |
| <input checked="" type="checkbox"/> | <a href="#">675</a> | 1168.5682 | 2335.1218 |
| <input checked="" type="checkbox"/> | <a href="#">683</a> | 785.4280  | 2353.2622 |
| <input checked="" type="checkbox"/> | <a href="#">689</a> | 837.3531  | 2509.0375 |
| <input checked="" type="checkbox"/> | <a href="#">690</a> | 837.3764  | 2509.1074 |
| <input checked="" type="checkbox"/> | <a href="#">694</a> | 651.8444  | 2603.3485 |
| <input checked="" type="checkbox"/> | <a href="#">695</a> | 888.4140  | 2662.2202 |
| <input checked="" type="checkbox"/> | <a href="#">700</a> | 888.7613  | 2663.2621 |
| <input checked="" type="checkbox"/> | <a href="#">702</a> | 888.7630  | 2663.2672 |
| <input checked="" type="checkbox"/> | <a href="#">707</a> | 911.4393  | 2731.2961 |
| <input checked="" type="checkbox"/> | <a href="#">708</a> | 912.4248  | 2734.2526 |
| <input checked="" type="checkbox"/> | <a href="#">709</a> | 916.4249  | 2746.2529 |
| <input checked="" type="checkbox"/> | <a href="#">712</a> | 917.0737  | 2748.1993 |
| <input checked="" type="checkbox"/> | <a href="#">713</a> | 917.0783  | 2748.2131 |
| <input checked="" type="checkbox"/> | <a href="#">714</a> | 917.0785  | 2748.2137 |
| <input checked="" type="checkbox"/> | <a href="#">716</a> | 917.0837  | 2748.2293 |
| <input checked="" type="checkbox"/> | <a href="#">717</a> | 917.0848  | 2748.2326 |
| <input checked="" type="checkbox"/> | <a href="#">718</a> | 922.4142  | 2764.2208 |
| <input checked="" type="checkbox"/> | <a href="#">719</a> | 922.4227  | 2764.2463 |
| <input checked="" type="checkbox"/> | <a href="#">720</a> | 922.4397  | 2764.2973 |
| <input checked="" type="checkbox"/> | <a href="#">721</a> | 927.7492  | 2780.2258 |
| <input checked="" type="checkbox"/> | <a href="#">722</a> | 932.4215  | 2794.2427 |
| <input checked="" type="checkbox"/> | <a href="#">723</a> | 702.3979  | 2805.5625 |
| <input checked="" type="checkbox"/> | <a href="#">724</a> | 938.3890  | 2812.1452 |
| <input checked="" type="checkbox"/> | <a href="#">725</a> | 1415.1267 | 2828.2388 |
| <input checked="" type="checkbox"/> | <a href="#">726</a> | 958.1252  | 2871.3538 |
| <input checked="" type="checkbox"/> | <a href="#">727</a> | 958.1253  | 2871.3541 |
| <input checked="" type="checkbox"/> | <a href="#">728</a> | 958.1334  | 2871.3784 |
| <input checked="" type="checkbox"/> | <a href="#">730</a> | 958.1431  | 2871.4075 |
| <input checked="" type="checkbox"/> | <a href="#">733</a> | 958.4709  | 2872.3909 |
| <input checked="" type="checkbox"/> | <a href="#">735</a> | 963.4701  | 2887.3885 |
| <input checked="" type="checkbox"/> | <a href="#">736</a> | 963.7979  | 2888.3719 |
| <input checked="" type="checkbox"/> | <a href="#">737</a> | 968.7911  | 2903.3515 |
| <input checked="" type="checkbox"/> | <a href="#">738</a> | 969.1218  | 2904.3436 |
| <input checked="" type="checkbox"/> | <a href="#">739</a> | 969.1257  | 2904.3553 |
| <input checked="" type="checkbox"/> | <a href="#">740</a> | 973.4473  | 2917.3201 |
| <input checked="" type="checkbox"/> | <a href="#">741</a> | 753.3869  | 3009.5185 |
| <input checked="" type="checkbox"/> | <a href="#">742</a> | 767.4480  | 3065.7629 |
| <input checked="" type="checkbox"/> | <a href="#">744</a> | 1066.1575 | 3195.4507 |
| <input checked="" type="checkbox"/> | <a href="#">746</a> | 1082.2153 | 3243.6241 |
| <input checked="" type="checkbox"/> | <a href="#">747</a> | 816.6345  | 3262.5089 |
| <input checked="" type="checkbox"/> | <a href="#">748</a> | 1088.8136 | 3263.4190 |



|                                     |                     |           |           |
|-------------------------------------|---------------------|-----------|-----------|
| <input checked="" type="checkbox"/> | <a href="#">749</a> | 1088.8392 | 3263.4958 |
| <input checked="" type="checkbox"/> | <a href="#">750</a> | 1106.5133 | 3316.5181 |
| <input checked="" type="checkbox"/> | <a href="#">752</a> | 841.9054  | 3363.5925 |
| <input checked="" type="checkbox"/> | <a href="#">753</a> | 854.3892  | 3413.5277 |
| <input checked="" type="checkbox"/> | <a href="#">754</a> | 1188.5891 | 3562.7455 |
| <input checked="" type="checkbox"/> | <a href="#">755</a> | 892.1990  | 3564.7669 |
| <input checked="" type="checkbox"/> | <a href="#">756</a> | 894.1323  | 3572.5001 |
| <input checked="" type="checkbox"/> | <a href="#">757</a> | 898.2284  | 3588.8845 |
| <input checked="" type="checkbox"/> | <a href="#">758</a> | 905.8012  | 3619.1757 |
| <input checked="" type="checkbox"/> | <a href="#">759</a> | 920.1791  | 3676.6873 |
| <input checked="" type="checkbox"/> | <a href="#">760</a> | 953.6735  | 3810.6649 |
| <input checked="" type="checkbox"/> | <a href="#">761</a> | 984.5250  | 3934.0709 |
| <input checked="" type="checkbox"/> | <a href="#">762</a> | 1004.2122 | 4012.8197 |
| <input checked="" type="checkbox"/> | <a href="#">764</a> | 1024.5935 | 4094.3449 |
| <input checked="" type="checkbox"/> | <a href="#">765</a> | 1088.9841 | 4351.9073 |
| <input checked="" type="checkbox"/> | <a href="#">766</a> | 1094.2787 | 4373.0857 |
| <input checked="" type="checkbox"/> | <a href="#">767</a> | 1111.0824 | 4440.3005 |
| <input checked="" type="checkbox"/> | <a href="#">768</a> | 1130.5969 | 4518.3585 |

---

### Search Parameters

Type of search : MS/MS Ion Search  
Enzyme : Trypsin  
Fixed modifications : Carbamidomethyl (C)  
Variable modifications : Oxidation (M)  
Mass values : Monoisotopic  
Protein Mass : Unrestricted  
Peptide Mass Tolerance :  $\pm 50$  ppm  
Fragment Mass Tolerance:  $\pm 0.2$  Da  
Max Missed Cleavages : 1  
Instrument type : ESI-QUAD-TOF  
Number of queries : 768

Mascot: <http://www.matrixscience.com/>



## Mascot Search Results

**User** : Dominic  
**Email** : dominic.kurian@bbsrc.ac.uk  
**Search title** : IPI Mouse\_15-02-2010  
**MS data file** : D:\PeakList\Dominic Kurian\QTofDK20010805 GATC P 0010883.pk1  
**Database** : IPI\_mouse MOUSE\_v3\_79 (54943 sequences; 24917557 residues)  
**Timestamp** : 15 Feb 2011 at 15:25:08 GMT  
**Protein hits** :

- [IPI00621806](#) Tax\_Id=10090 Gene\_Symbol=Camk2a Isoform Alpha CaMKII of Calcium/calmodulin-dependent protein kinase type II subunit alpha
- [IPI00474502](#) Tax\_Id=10090 Gene\_Symbol=Camk2b Calcium/calmodulin-dependent protein kinase type II subunit beta
- [IPI00406790](#) Tax\_Id=10090 Gene\_Symbol=Camk2d Isoform 4 of Calcium/calmodulin-dependent protein kinase type II subunit
- [IPI00124695](#) Tax\_Id=10090 Gene\_Symbol=Camk2g Isoform 1 of Calcium/calmodulin-dependent protein kinase type II subunit
- [IPI00169463](#) Tax\_Id=10090 Gene\_Symbol=Tubb2c Tubulin beta-2C chain
- [IPI00110850](#) Tax\_Id=10090 Gene\_Symbol=Actb Actin, cytoplasmic 1
- [IPI00115546](#) Tax\_Id=10090 Gene\_Symbol=Gnao1 Isoform Alpha-2 of Guanine nucleotide-binding protein G(o) subunit alpha
- [IPI00221528](#) Tax\_Id=10090 Gene\_Symbol=Actb12 Beta-actin-like protein 2
- [IPI00112251](#) Tax\_Id=10090 Gene\_Symbol=Tubb3 Tubulin beta-3 chain
- [IPI00323571](#) Tax\_Id=10090 Gene\_Symbol=Apoe Apolipoprotein E
- [IPI00117352](#) Tax\_Id=10090 Gene\_Symbol=Tubb5 Tubulin beta-5 chain
- [IPI00138892](#) Tax\_Id=10090 Gene\_Symbol=Uba52 Ubiquitin-60S ribosomal protein L40
- [IPI00755181](#) Tax\_Id=10090 Gene\_Symbol=Krt10 keratin, type I cytoskeletal 10
- [IPI00122094](#) Tax\_Id=10090 Gene\_Symbol=Dlg4 Isoform 2 of Disks large homolog 4
- [IPI00131366](#) Tax\_Id=10090 Gene\_Symbol=Krt6b Keratin, type II cytoskeletal 6B
- [IPI00134997](#) Tax\_Id=10090 Gene\_Symbol=Dlgap3 Disks large-associated protein 3
- [IPI00122928](#) Tax\_Id=10090 Gene\_Symbol=Tubb6 Tubulin beta-6 chain
- [IPI00109061](#) Tax\_Id=10090 Gene\_Symbol=Tubb2b Tubulin beta-2B chain
- [IPI00462140](#) Tax\_Id=10090 Gene\_Symbol=Krt77 Keratin, type II cytoskeletal 1b
- [IPI00420970](#) Tax\_Id=10090 Gene\_Symbol=Krt74 Keratin, type II cytoskeletal 74
- [IPI00131209](#) Tax\_Id=10090 Gene\_Symbol=Krt16 Keratin intermediate filament 16a
- [IPI00348328](#) Tax\_Id=10090 Gene\_Symbol=Krt78 keratin Kb40
- [IPI00322209](#) Tax\_Id=10090 Gene\_Symbol=Krt8 Keratin, type II cytoskeletal 8
- [IPI00119063](#) Tax\_Id=10090 Gene\_Symbol=Lrp1 Prolow-density lipoprotein receptor-related protein 1
- [IPI00121038](#) Tax\_Id=10090 Gene\_Symbol=Vcan Isoform V0 of Versican core protein
- [IPI00122048](#) Tax\_Id=10090 Gene\_Symbol=Atpla3 Sodium/potassium-transporting ATPase subunit alpha-3
- [IPI00120793](#) Tax\_Id=10090 Gene\_Symbol=Prnp Major prion protein
- [IPI00136402](#) Tax\_Id=10090 Gene\_Symbol=Dlgap1 Isoform 1 of Disks large-associated protein 1
- [IPI00222548](#) Tax\_Id=10090 Gene\_Symbol=Rpl29;Gml3841;Gm8210 60S ribosomal protein L29
- [IPI00124499](#) Tax\_Id=10090 Gene\_Symbol=Krt79 Keratin, type II cytoskeletal 79
- [IPI00113410](#) Tax\_Id=10090 Gene\_Symbol=Hapln2 Hyaluronan and proteoglycan link protein 2
- [IPI00223714](#) Tax\_Id=10090 Gene\_Symbol=Hist1h1e Histone H1.4
- [IPI00136703](#) Tax\_Id=10090 Gene\_Symbol=Ckb Creatine kinase B-type
- [IPI00229598](#) Tax\_Id=10090 Gene\_Symbol=Cnp Isoform CNPI of 2',3'-cyclic-nucleotide 3'-phosphodiesterase
- [IPI00123176](#) Tax\_Id=10090 Gene\_Symbol=Gm6316 Glyceraldehyde-3-phosphate dehydrogenase

### IPI\_mouse [Decoy](#) False discovery rate

|                                                      |     |   |        |
|------------------------------------------------------|-----|---|--------|
| Peptide matches above identity threshold             | 229 | 0 | 0.00 % |
| Peptide matches above homology or identity threshold | 245 | 2 | 0.82 % |

### Probability Based Mowse Score

Ions score is  $-10 \cdot \log(P)$ , where P is the probability that the observed match is a random event.

Individual ions scores > 37 indicate identity or extensive homology ( $p < 0.01$ ).

Protein scores are derived from ions scores as a non-probabilistic basis for ranking protein hits.

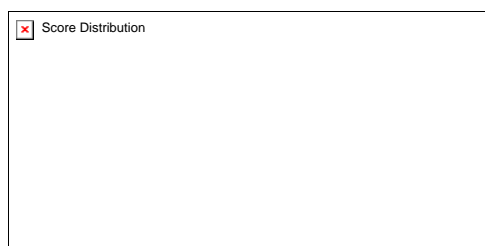

### Peptide Summary Report

Format As [Peptide Summary](#) [Help](#)  
 Significance threshold  $p < 0.01$  Max. number of hits [AUTO](#)  
 Standard scoring  MudPIT scoring  Ions score or expect cut-off  Show sub-sets   
 Show pop-ups  Suppress pop-ups  Sort unassigned [Decreasing Score](#)  Require bold red   
    **Error tolerant**

1. [IPI00621806](#) Mass: 54651 Score: 3316 Queries matched: 156 empAI: 1.55  
 Tax\_Id=10090 Gene\_Symbol=Camk2a Isoform Alpha CaMKII of Calcium/calmodulin-dependent protein kinase type II subunit alpha  
 Check to include this hit in error tolerant search or archive report

| Query                                                  | Observed | Mr(expt) | Mr(calc) | ppm  | Miss | Score | Expect | Rank | Peptide   |
|--------------------------------------------------------|----------|----------|----------|------|------|-------|--------|------|-----------|
| <input checked="" type="checkbox"/> <a href="#">5</a>  | 445.2779 | 444.2706 | 444.2696 | 2.25 | 0    | (7)   | 29     | 1    | K.GAAVK.L |
| <input checked="" type="checkbox"/> <a href="#">6</a>  | 445.2791 | 444.2718 | 444.2696 | 4.95 | 0    | 8     | 27     | 1    | K.GAAVK.L |
| <input checked="" type="checkbox"/> <a href="#">11</a> | 602.3611 | 601.3538 | 601.3435 | 17.2 | 0    | 12    | 12     | 1    | K.DLINK.M |

|     |          |           |           |        |   |      |          |    |                               |
|-----|----------|-----------|-----------|--------|---|------|----------|----|-------------------------------|
| 49  | 432.7308 | 863.4470  | 863.4501  | -3.56  | 0 | (24) | 0.43     | 1  | R.SGAPSVLPH.-                 |
| 50  | 432.7333 | 863.4520  | 863.4501  | 2.23   | 0 | (14) | 3.8      | 1  | R.SGAPSVLPH.-                 |
| 51  | 432.7336 | 863.4526  | 863.4501  | 2.93   | 0 | 26   | 0.24     | 1  | R.SGAPSVLPH.-                 |
| 69  | 452.2506 | 902.4866  | 902.4895  | -3.18  | 0 | 33   | 0.049    | 1  | K.MLTINPSK.R                  |
| 70  | 452.2533 | 902.4920  | 902.4895  | 2.80   | 0 | (10) | 10       | 1  | K.MLTINPSK.R                  |
| 72  | 461.2145 | 920.4144  | 920.4199  | -5.95  | 0 | 23   | 0.31     | 1  | R.TAQSEETR.V                  |
| 116 | 525.2833 | 1048.5520 | 1048.5553 | -3.09  | 0 | (49) | 0.0012   | 1  | K.VLAGQEYAAK.I                |
| 117 | 525.2841 | 1048.5536 | 1048.5553 | -1.56  | 0 | (33) | 0.044    | 1  | K.VLAGQEYAAK.I                |
| 118 | 525.2841 | 1048.5536 | 1048.5553 | -1.56  | 0 | (45) | 0.0028   | 1  | K.VLAGQEYAAK.I                |
| 119 | 525.2849 | 1048.5552 | 1048.5553 | -0.03  | 0 | 52   | 0.00048  | 1  | K.VLAGQEYAAK.I                |
| 120 | 525.2850 | 1048.5554 | 1048.5553 | 0.16   | 0 | (52) | 0.00049  | 1  | K.VLAGQEYAAK.I                |
| 121 | 525.2855 | 1048.5564 | 1048.5553 | 1.11   | 0 | (45) | 0.0028   | 1  | K.VLAGQEYAAK.I                |
| 125 | 530.2988 | 1058.5830 | 1058.5906 | -7.15  | 1 | (38) | 0.012    | 1  | K.MLTINPSKR.I                 |
| 126 | 530.2988 | 1058.5830 | 1058.5906 | -7.15  | 1 | (14) | 3.6      | 1  | K.MLTINPSKR.I                 |
| 127 | 530.2996 | 1058.5846 | 1058.5906 | -5.64  | 1 | (48) | 0.0014   | 1  | K.MLTINPSKR.I                 |
| 128 | 530.2996 | 1058.5846 | 1058.5906 | -5.64  | 1 | (49) | 0.0012   | 1  | K.MLTINPSKR.I                 |
| 129 | 530.3013 | 1058.5880 | 1058.5906 | -2.43  | 1 | (46) | 0.0019   | 1  | K.MLTINPSKR.I                 |
| 130 | 530.3015 | 1058.5884 | 1058.5906 | -2.05  | 1 | (38) | 0.013    | 1  | K.MLTINPSKR.I                 |
| 131 | 530.3017 | 1058.5888 | 1058.5906 | -1.68  | 1 | 52   | 0.00042  | 1  | K.MLTINPSKR.I                 |
| 132 | 530.3019 | 1058.5892 | 1058.5906 | -1.30  | 1 | (43) | 0.0033   | 1  | K.MLTINPSKR.I                 |
| 133 | 530.3021 | 1058.5896 | 1058.5906 | -0.92  | 1 | (33) | 0.041    | 1  | K.MLTINPSKR.I                 |
| 134 | 530.3024 | 1058.5902 | 1058.5906 | -0.35  | 1 | (40) | 0.0077   | 1  | K.MLTINPSKR.I                 |
| 135 | 530.3027 | 1058.5908 | 1058.5906 | 0.21   | 1 | (49) | 0.001    | 1  | K.MLTINPSKR.I                 |
| 136 | 530.3054 | 1058.5962 | 1058.5906 | 5.31   | 1 | (41) | 0.006    | 1  | K.MLTINPSKR.I                 |
| 144 | 538.2992 | 1074.5838 | 1074.5855 | -1.58  | 1 | (21) | 0.68     | 2  | K.MLTINPSKR.I + Oxidation (M) |
| 145 | 538.2996 | 1074.5846 | 1074.5855 | -0.83  | 1 | (7)  | 16       | 10 | K.MLTINPSKR.I + Oxidation (M) |
| 146 | 538.3000 | 1074.5854 | 1074.5855 | -0.09  | 1 | (47) | 0.0018   | 1  | K.MLTINPSKR.I + Oxidation (M) |
| 147 | 538.3003 | 1074.5860 | 1074.5855 | 0.47   | 1 | (23) | 0.42     | 1  | K.MLTINPSKR.I + Oxidation (M) |
| 197 | 574.3211 | 1146.6276 | 1146.6431 | -13.45 | 0 | (62) | 4.1e-005 | 1  | K.GAILTTMLATR.N               |
| 198 | 574.3234 | 1146.6322 | 1146.6431 | -9.43  | 0 | (38) | 0.011    | 1  | K.GAILTTMLATR.N               |
| 199 | 574.3245 | 1146.6344 | 1146.6431 | -7.52  | 0 | (45) | 0.002    | 1  | K.GAILTTMLATR.N               |
| 200 | 574.3247 | 1146.6348 | 1146.6431 | -7.17  | 0 | (54) | 0.00025  | 1  | K.GAILTTMLATR.N               |
| 201 | 574.3251 | 1146.6356 | 1146.6431 | -6.47  | 0 | (52) | 0.00036  | 1  | K.GAILTTMLATR.N               |
| 202 | 574.3251 | 1146.6356 | 1146.6431 | -6.47  | 0 | (38) | 0.011    | 1  | K.GAILTTMLATR.N               |
| 203 | 574.3258 | 1146.6370 | 1146.6431 | -5.25  | 0 | (64) | 2.4e-005 | 1  | K.GAILTTMLATR.N               |
| 204 | 574.3258 | 1146.6370 | 1146.6431 | -5.25  | 0 | (59) | 8.2e-005 | 1  | K.GAILTTMLATR.N               |
| 205 | 574.3262 | 1146.6378 | 1146.6431 | -4.55  | 0 | (59) | 7.9e-005 | 1  | K.GAILTTMLATR.N               |
| 206 | 574.3262 | 1146.6378 | 1146.6431 | -4.55  | 0 | (43) | 0.0032   | 1  | K.GAILTTMLATR.N               |
| 207 | 574.3263 | 1146.6380 | 1146.6431 | -4.38  | 0 | (57) | 0.00014  | 1  | K.GAILTTMLATR.N               |
| 208 | 574.3271 | 1146.6396 | 1146.6431 | -2.98  | 0 | (48) | 0.00088  | 1  | K.GAILTTMLATR.N               |
| 209 | 574.3272 | 1146.6398 | 1146.6431 | -2.81  | 0 | (46) | 0.0013   | 1  | K.GAILTTMLATR.N               |
| 210 | 574.3275 | 1146.6404 | 1146.6431 | -2.28  | 0 | (41) | 0.0049   | 1  | K.GAILTTMLATR.N               |
| 211 | 574.3278 | 1146.6410 | 1146.6431 | -1.76  | 0 | (58) | 8.4e-005 | 1  | K.GAILTTMLATR.N               |
| 212 | 574.3279 | 1146.6412 | 1146.6431 | -1.59  | 0 | (59) | 7.2e-005 | 1  | K.GAILTTMLATR.N               |
| 213 | 574.3279 | 1146.6412 | 1146.6431 | -1.59  | 0 | (59) | 7.1e-005 | 1  | K.GAILTTMLATR.N               |
| 214 | 574.3279 | 1146.6412 | 1146.6431 | -1.59  | 0 | (59) | 7.1e-005 | 1  | K.GAILTTMLATR.N               |
| 215 | 574.3281 | 1146.6416 | 1146.6431 | -1.24  | 0 | (63) | 3e-005   | 1  | K.GAILTTMLATR.N               |
| 216 | 574.3281 | 1146.6416 | 1146.6431 | -1.24  | 0 | 78   | 9.7e-007 | 1  | K.GAILTTMLATR.N               |
| 217 | 574.3283 | 1146.6420 | 1146.6431 | -0.89  | 0 | (50) | 0.00053  | 1  | K.GAILTTMLATR.N               |
| 218 | 574.3287 | 1146.6428 | 1146.6431 | -0.19  | 0 | (49) | 0.00065  | 1  | K.GAILTTMLATR.N               |
| 219 | 574.3294 | 1146.6442 | 1146.6431 | 1.03   | 0 | (56) | 0.00015  | 1  | K.GAILTTMLATR.N               |
| 220 | 574.3297 | 1146.6448 | 1146.6431 | 1.55   | 0 | (31) | 0.048    | 1  | K.GAILTTMLATR.N               |
| 221 | 574.3318 | 1146.6490 | 1146.6431 | 5.22   | 0 | (42) | 0.0029   | 1  | K.GAILTTMLATR.N               |
| 261 | 631.3007 | 1260.5868 | 1260.5927 | -4.68  | 0 | (35) | 0.02     | 1  | R.FYPENLWSR.N                 |
| 262 | 631.3032 | 1260.5918 | 1260.5927 | -0.71  | 0 | (37) | 0.012    | 1  | R.FYPENLWSR.N                 |
| 263 | 631.3038 | 1260.5930 | 1260.5927 | 0.24   | 0 | (48) | 0.001    | 1  | R.FYPENLWSR.N                 |
| 264 | 631.3044 | 1260.5942 | 1260.5927 | 1.19   | 0 | (35) | 0.021    | 1  | R.FYPENLWSR.N                 |
| 265 | 631.3046 | 1260.5946 | 1260.5927 | 1.51   | 0 | (51) | 0.00059  | 1  | R.FYPENLWSR.N                 |
| 266 | 631.3048 | 1260.5950 | 1260.5927 | 1.83   | 0 | (48) | 0.0011   | 1  | R.FYPENLWSR.N                 |
| 267 | 631.3051 | 1260.5956 | 1260.5927 | 2.30   | 0 | (38) | 0.0099   | 1  | R.FYPENLWSR.N                 |
| 268 | 631.3055 | 1260.5964 | 1260.5927 | 2.94   | 0 | (48) | 0.0011   | 1  | R.FYPENLWSR.N                 |
| 269 | 631.3056 | 1260.5966 | 1260.5927 | 3.10   | 0 | (51) | 0.0006   | 1  | R.FYPENLWSR.N                 |
| 270 | 631.3056 | 1260.5966 | 1260.5927 | 3.10   | 0 | (36) | 0.016    | 1  | R.FYPENLWSR.N                 |
| 271 | 631.3060 | 1260.5974 | 1260.5927 | 3.73   | 0 | (51) | 0.0006   | 1  | R.FYPENLWSR.N                 |
| 272 | 631.3065 | 1260.5984 | 1260.5927 | 4.53   | 0 | 51   | 0.00061  | 1  | R.FYPENLWSR.N                 |
| 292 | 652.3373 | 1302.6600 | 1302.6932 | -25.44 | 0 | (54) | 0.00031  | 1  | R.ITQYLDAGGIPR.T              |
| 293 | 652.3430 | 1302.6714 | 1302.6932 | -16.69 | 0 | (75) | 2.6e-006 | 1  | R.ITQYLDAGGIPR.T              |
| 294 | 652.3467 | 1302.6788 | 1302.6932 | -11.01 | 0 | (73) | 4e-006   | 1  | R.ITQYLDAGGIPR.T              |
| 295 | 652.3514 | 1302.6882 | 1302.6932 | -3.80  | 0 | (59) | 0.0001   | 1  | R.ITQYLDAGGIPR.T              |
| 296 | 652.3551 | 1302.6956 | 1302.6932 | 1.89   | 0 | (77) | 1.4e-006 | 1  | R.ITQYLDAGGIPR.T              |
| 297 | 652.3551 | 1302.6956 | 1302.6932 | 1.89   | 0 | 79   | 9.7e-007 | 1  | R.ITQYLDAGGIPR.T              |
| 298 | 652.3563 | 1302.6980 | 1302.6932 | 3.73   | 0 | (52) | 0.0004   | 1  | R.ITQYLDAGGIPR.T              |
| 308 | 670.8843 | 1339.7540 | 1339.7711 | -12.71 | 0 | (4)  | 18       | 1  | R.DLKPENLLLASK.L              |
| 309 | 670.8865 | 1339.7584 | 1339.7711 | -9.42  | 0 | (20) | 0.47     | 1  | R.DLKPENLLLASK.L              |
| 310 | 670.8892 | 1339.7638 | 1339.7711 | -5.39  | 0 | (27) | 0.088    | 1  | R.DLKPENLLLASK.L              |
| 311 | 670.8903 | 1339.7660 | 1339.7711 | -3.75  | 0 | (52) | 0.00028  | 1  | R.DLKPENLLLASK.L              |
| 312 | 670.8908 | 1339.7670 | 1339.7711 | -3.00  | 0 | (33) | 0.018    | 1  | R.DLKPENLLLASK.L              |
| 313 | 670.8910 | 1339.7674 | 1339.7711 | -2.70  | 0 | (35) | 0.012    | 1  | R.DLKPENLLLASK.L              |
| 314 | 670.8913 | 1339.7680 | 1339.7711 | -2.26  | 0 | (53) | 0.00019  | 1  | R.DLKPENLLLASK.L              |
| 315 | 670.8915 | 1339.7684 | 1339.7711 | -1.96  | 0 | (60) | 3.6e-005 | 1  | R.DLKPENLLLASK.L              |
| 316 | 670.8926 | 1339.7706 | 1339.7711 | -0.32  | 0 | (58) | 6.1e-005 | 1  | R.DLKPENLLLASK.L              |

|                                     |                     |           |           |           |        |   |       |          |   |                               |
|-------------------------------------|---------------------|-----------|-----------|-----------|--------|---|-------|----------|---|-------------------------------|
| <input checked="" type="checkbox"/> | <a href="#">317</a> | 670.8928  | 1339.7710 | 1339.7711 | -0.02  | 0 | (23)  | 0.17     | 1 | R.DLKPENLLLASK.L              |
| <input checked="" type="checkbox"/> | <a href="#">318</a> | 670.8931  | 1339.7716 | 1339.7711 | 0.43   | 0 | (37)  | 0.0077   | 1 | R.DLKPENLLLASK.L              |
| <input checked="" type="checkbox"/> | <a href="#">319</a> | 670.8934  | 1339.7722 | 1339.7711 | 0.88   | 0 | (61)  | 3e-005   | 1 | R.DLKPENLLLASK.L              |
| <input checked="" type="checkbox"/> | <a href="#">320</a> | 670.8937  | 1339.7728 | 1339.7711 | 1.33   | 0 | (66)  | 8.4e-006 | 1 | R.DLKPENLLLASK.L              |
| <input checked="" type="checkbox"/> | <a href="#">321</a> | 670.8940  | 1339.7734 | 1339.7711 | 1.77   | 0 | 82    | 2.1e-007 | 1 | R.DLKPENLLLASK.L              |
| <input checked="" type="checkbox"/> | <a href="#">322</a> | 670.8940  | 1339.7734 | 1339.7711 | 1.77   | 0 | (67)  | 6.9e-006 | 1 | R.DLKPENLLLASK.L              |
| <input checked="" type="checkbox"/> | <a href="#">323</a> | 670.8940  | 1339.7734 | 1339.7711 | 1.77   | 0 | (63)  | 1.7e-005 | 1 | R.DLKPENLLLASK.L              |
| <input checked="" type="checkbox"/> | <a href="#">324</a> | 670.8945  | 1339.7744 | 1339.7711 | 2.52   | 0 | (51)  | 0.00028  | 1 | R.DLKPENLLLASK.L              |
| <input checked="" type="checkbox"/> | <a href="#">325</a> | 670.8946  | 1339.7746 | 1339.7711 | 2.67   | 0 | (70)  | 3.2e-006 | 1 | R.DLKPENLLLASK.L              |
| <input checked="" type="checkbox"/> | <a href="#">326</a> | 670.8951  | 1339.7756 | 1339.7711 | 3.42   | 0 | (63)  | 1.6e-005 | 1 | R.DLKPENLLLASK.L              |
| <input checked="" type="checkbox"/> | <a href="#">327</a> | 670.8954  | 1339.7762 | 1339.7711 | 3.86   | 0 | (63)  | 1.6e-005 | 1 | R.DLKPENLLLASK.L              |
| <input checked="" type="checkbox"/> | <a href="#">328</a> | 670.8955  | 1339.7764 | 1339.7711 | 4.01   | 0 | (59)  | 4.4e-005 | 1 | R.DLKPENLLLASK.L              |
| <input checked="" type="checkbox"/> | <a href="#">398</a> | 816.8909  | 1631.7672 | 1631.7719 | -2.84  | 0 | (62)  | 4.1e-005 | 1 | R.FTEEYQLFEELGK.G             |
| <input checked="" type="checkbox"/> | <a href="#">399</a> | 816.8932  | 1631.7718 | 1631.7719 | -0.02  | 0 | (54)  | 0.00023  | 1 | R.FTEEYQLFEELGK.G             |
| <input checked="" type="checkbox"/> | <a href="#">400</a> | 816.8936  | 1631.7726 | 1631.7719 | 0.47   | 0 | (60)  | 6.7e-005 | 1 | R.FTEEYQLFEELGK.G             |
| <input checked="" type="checkbox"/> | <a href="#">401</a> | 816.8937  | 1631.7728 | 1631.7719 | 0.59   | 0 | (59)  | 8.6e-005 | 1 | R.FTEEYQLFEELGK.G             |
| <input checked="" type="checkbox"/> | <a href="#">402</a> | 816.8939  | 1631.7732 | 1631.7719 | 0.84   | 0 | (54)  | 0.00024  | 1 | R.FTEEYQLFEELGK.G             |
| <input checked="" type="checkbox"/> | <a href="#">403</a> | 816.8940  | 1631.7734 | 1631.7719 | 0.96   | 0 | (64)  | 2.3e-005 | 1 | R.FTEEYQLFEELGK.G             |
| <input checked="" type="checkbox"/> | <a href="#">404</a> | 816.8947  | 1631.7748 | 1631.7719 | 1.82   | 0 | (64)  | 2.6e-005 | 1 | R.FTEEYQLFEELGK.G             |
| <input checked="" type="checkbox"/> | <a href="#">405</a> | 816.8948  | 1631.7750 | 1631.7719 | 1.94   | 0 | (64)  | 2.4e-005 | 1 | R.FTEEYQLFEELGK.G             |
| <input checked="" type="checkbox"/> | <a href="#">406</a> | 816.8949  | 1631.7752 | 1631.7719 | 2.06   | 0 | 70    | 6.7e-006 | 1 | R.FTEEYQLFEELGK.G             |
| <input checked="" type="checkbox"/> | <a href="#">407</a> | 816.8950  | 1631.7754 | 1631.7719 | 2.19   | 0 | (58)  | 0.00011  | 1 | R.FTEEYQLFEELGK.G             |
| <input checked="" type="checkbox"/> | <a href="#">408</a> | 816.8951  | 1631.7756 | 1631.7719 | 2.31   | 0 | (66)  | 1.7e-005 | 1 | R.FTEEYQLFEELGK.G             |
| <input checked="" type="checkbox"/> | <a href="#">409</a> | 816.8952  | 1631.7758 | 1631.7719 | 2.43   | 0 | (63)  | 3e-005   | 1 | R.FTEEYQLFEELGK.G             |
| <input checked="" type="checkbox"/> | <a href="#">410</a> | 816.8953  | 1631.7760 | 1631.7719 | 2.55   | 0 | (59)  | 7.2e-005 | 1 | R.FTEEYQLFEELGK.G             |
| <input checked="" type="checkbox"/> | <a href="#">411</a> | 816.8957  | 1631.7768 | 1631.7719 | 3.04   | 0 | (64)  | 2.6e-005 | 1 | R.FTEEYQLFEELGK.G             |
| <input checked="" type="checkbox"/> | <a href="#">412</a> | 816.8958  | 1631.7770 | 1631.7719 | 3.17   | 0 | (61)  | 4.7e-005 | 1 | R.FTEEYQLFEELGK.G             |
| <input checked="" type="checkbox"/> | <a href="#">413</a> | 816.8960  | 1631.7774 | 1631.7719 | 3.41   | 0 | (61)  | 4.9e-005 | 1 | R.FTEEYQLFEELGK.G             |
| <input checked="" type="checkbox"/> | <a href="#">414</a> | 816.8961  | 1631.7776 | 1631.7719 | 3.53   | 0 | (53)  | 0.00032  | 1 | R.FTEEYQLFEELGK.G             |
| <input checked="" type="checkbox"/> | <a href="#">415</a> | 816.8961  | 1631.7776 | 1631.7719 | 3.53   | 0 | (56)  | 0.00017  | 1 | R.FTEEYQLFEELGK.G             |
| <input checked="" type="checkbox"/> | <a href="#">416</a> | 816.8962  | 1631.7778 | 1631.7719 | 3.66   | 0 | (67)  | 1.4e-005 | 1 | R.FTEEYQLFEELGK.G             |
| <input checked="" type="checkbox"/> | <a href="#">417</a> | 816.8962  | 1631.7778 | 1631.7719 | 3.66   | 0 | (60)  | 6.2e-005 | 1 | R.FTEEYQLFEELGK.G             |
| <input checked="" type="checkbox"/> | <a href="#">418</a> | 816.8970  | 1631.7794 | 1631.7719 | 4.64   | 0 | (57)  | 0.00013  | 1 | R.FTEEYQLFEELGK.G             |
| <input checked="" type="checkbox"/> | <a href="#">419</a> | 816.8971  | 1631.7796 | 1631.7719 | 4.76   | 0 | (26)  | 0.15     | 1 | R.FTEEYQLFEELGK.G             |
| <input checked="" type="checkbox"/> | <a href="#">420</a> | 816.8973  | 1631.7800 | 1631.7719 | 5.00   | 0 | (51)  | 0.0005   | 1 | R.FTEEYQLFEELGK.G             |
| <input checked="" type="checkbox"/> | <a href="#">421</a> | 816.8973  | 1631.7800 | 1631.7719 | 5.00   | 0 | (68)  | 1.1e-005 | 1 | R.FTEEYQLFEELGK.G             |
| <input checked="" type="checkbox"/> | <a href="#">422</a> | 816.8975  | 1631.7804 | 1631.7719 | 5.25   | 0 | (62)  | 4e-005   | 1 | R.FTEEYQLFEELGK.G             |
| <input checked="" type="checkbox"/> | <a href="#">423</a> | 816.8977  | 1631.7808 | 1631.7719 | 5.50   | 0 | (61)  | 5.2e-005 | 1 | R.FTEEYQLFEELGK.G             |
| <input checked="" type="checkbox"/> | <a href="#">424</a> | 816.8977  | 1631.7808 | 1631.7719 | 5.50   | 0 | (55)  | 0.0002   | 1 | R.FTEEYQLFEELGK.G             |
| <input checked="" type="checkbox"/> | <a href="#">425</a> | 816.8979  | 1631.7812 | 1631.7719 | 5.74   | 0 | (57)  | 0.00013  | 1 | R.FTEEYQLFEELGK.G             |
| <input checked="" type="checkbox"/> | <a href="#">426</a> | 816.8990  | 1631.7834 | 1631.7719 | 7.09   | 0 | (54)  | 0.00024  | 1 | R.FTEEYQLFEELGK.G             |
| <input checked="" type="checkbox"/> | <a href="#">477</a> | 680.9728  | 2039.8966 | 2039.9131 | -8.10  | 1 | 103   | 1.4e-009 | 1 | K.ESSESTNTTIEDEDTKVR.K        |
| <input checked="" type="checkbox"/> | <a href="#">478</a> | 680.9773  | 2039.9101 | 2039.9131 | -1.48  | 1 | (102) | 2.3e-009 | 1 | K.ESSESTNTTIEDEDTKVR.K        |
| <input checked="" type="checkbox"/> | <a href="#">483</a> | 1040.9476 | 2079.8806 | 2079.9426 | -29.76 | 0 | (74)  | 8.8e-007 | 1 | K.AGAYDFPSPPEWDTVTPEAK.D      |
| <input checked="" type="checkbox"/> | <a href="#">484</a> | 1040.9493 | 2079.8840 | 2079.9426 | -28.13 | 0 | (58)  | 3.7e-005 | 1 | K.AGAYDFPSPPEWDTVTPEAK.D      |
| <input checked="" type="checkbox"/> | <a href="#">485</a> | 1040.9618 | 2079.9090 | 2079.9426 | -16.11 | 0 | (57)  | 5.8e-005 | 1 | K.AGAYDFPSPPEWDTVTPEAK.D      |
| <input checked="" type="checkbox"/> | <a href="#">486</a> | 694.3159  | 2079.9259 | 2079.9426 | -8.02  | 0 | (70)  | 3.7e-006 | 1 | K.AGAYDFPSPPEWDTVTPEAK.D      |
| <input checked="" type="checkbox"/> | <a href="#">487</a> | 694.3180  | 2079.9322 | 2079.9426 | -4.99  | 0 | 90    | 3.7e-008 | 1 | K.AGAYDFPSPPEWDTVTPEAK.D      |
| <input checked="" type="checkbox"/> | <a href="#">488</a> | 1040.9735 | 2079.9324 | 2079.9426 | -4.86  | 0 | (42)  | 0.0023   | 1 | K.AGAYDFPSPPEWDTVTPEAK.D      |
| <input checked="" type="checkbox"/> | <a href="#">489</a> | 1040.9767 | 2079.9388 | 2079.9426 | -1.78  | 0 | (64)  | 1.7e-005 | 1 | K.AGAYDFPSPPEWDTVTPEAK.D      |
| <input checked="" type="checkbox"/> | <a href="#">490</a> | 1040.9814 | 2079.9482 | 2079.9426 | 2.74   | 0 | (62)  | 2.8e-005 | 1 | K.AGAYDFPSPPEWDTVTPEAK.D      |
| <input checked="" type="checkbox"/> | <a href="#">491</a> | 1040.9825 | 2079.9504 | 2079.9426 | 3.80   | 0 | (75)  | 1.4e-006 | 1 | K.AGAYDFPSPPEWDTVTPEAK.D      |
| <input checked="" type="checkbox"/> | <a href="#">498</a> | 715.3460  | 2143.0162 | 2143.0321 | -7.42  | 0 | (71)  | 4.1e-006 | 1 | K.VTEQLIEAISNGDFESYTK.M       |
| <input checked="" type="checkbox"/> | <a href="#">499</a> | 715.3465  | 2143.0177 | 2143.0321 | -6.72  | 0 | 102   | 3.4e-009 | 1 | K.VTEQLIEAISNGDFESYTK.M       |
| <input checked="" type="checkbox"/> | <a href="#">500</a> | 1072.5264 | 2143.0382 | 2143.0321 | 2.88   | 0 | (93)  | 2.6e-008 | 1 | K.VTEQLIEAISNGDFESYTK.M       |
| <input checked="" type="checkbox"/> | <a href="#">501</a> | 1072.5287 | 2143.0428 | 2143.0321 | 5.03   | 0 | (77)  | 1e-006   | 1 | K.VTEQLIEAISNGDFESYTK.M       |
| <input checked="" type="checkbox"/> | <a href="#">558</a> | 888.7586  | 2663.2540 | 2663.2755 | -8.08  | 1 | (47)  | 0.00081  | 1 | K.AGAYDFPSPPEWDTVTPEAKDLINK.M |
| <input checked="" type="checkbox"/> | <a href="#">559</a> | 888.7591  | 2663.2555 | 2663.2755 | -7.52  | 1 | (71)  | 3.1e-006 | 1 | K.AGAYDFPSPPEWDTVTPEAKDLINK.M |
| <input checked="" type="checkbox"/> | <a href="#">560</a> | 888.7594  | 2663.2564 | 2663.2755 | -7.18  | 1 | (90)  | 4e-008   | 1 | K.AGAYDFPSPPEWDTVTPEAKDLINK.M |
| <input checked="" type="checkbox"/> | <a href="#">561</a> | 888.7601  | 2663.2585 | 2663.2755 | -6.39  | 1 | (59)  | 4.9e-005 | 1 | K.AGAYDFPSPPEWDTVTPEAKDLINK.M |
| <input checked="" type="checkbox"/> | <a href="#">562</a> | 888.7601  | 2663.2585 | 2663.2755 | -6.39  | 1 | 97    | 8.5e-009 | 1 | K.AGAYDFPSPPEWDTVTPEAKDLINK.M |
| <input checked="" type="checkbox"/> | <a href="#">563</a> | 888.7603  | 2663.2591 | 2663.2755 | -6.17  | 1 | (78)  | 7e-007   | 1 | K.AGAYDFPSPPEWDTVTPEAKDLINK.M |
| <input checked="" type="checkbox"/> | <a href="#">564</a> | 888.7603  | 2663.2591 | 2663.2755 | -6.17  | 1 | (79)  | 5.1e-007 | 1 | K.AGAYDFPSPPEWDTVTPEAKDLINK.M |
| <input checked="" type="checkbox"/> | <a href="#">565</a> | 888.7603  | 2663.2591 | 2663.2755 | -6.17  | 1 | (78)  | 7e-007   | 1 | K.AGAYDFPSPPEWDTVTPEAKDLINK.M |
| <input checked="" type="checkbox"/> | <a href="#">566</a> | 888.7608  | 2663.2606 | 2663.2755 | -5.60  | 1 | (74)  | 1.5e-006 | 1 | K.AGAYDFPSPPEWDTVTPEAKDLINK.M |
| <input checked="" type="checkbox"/> | <a href="#">567</a> | 888.7608  | 2663.2606 | 2663.2755 | -5.60  | 1 | (52)  | 0.00027  | 1 | K.AGAYDFPSPPEWDTVTPEAKDLINK.M |
| <input checked="" type="checkbox"/> | <a href="#">568</a> | 888.7616  | 2663.2630 | 2663.2755 | -4.70  | 1 | (32)  | 0.03     | 1 | K.AGAYDFPSPPEWDTVTPEAKDLINK.M |
| <input checked="" type="checkbox"/> | <a href="#">569</a> | 888.7617  | 2663.2633 | 2663.2755 | -4.59  | 1 | (26)  | 0.11     | 1 | K.AGAYDFPSPPEWDTVTPEAKDLINK.M |
| <input checked="" type="checkbox"/> | <a href="#">570</a> | 888.7621  | 2663.2645 | 2663.2755 | -4.14  | 1 | (79)  | 4.8e-007 | 1 | K.AGAYDFPSPPEWDTVTPEAKDLINK.M |
| <input checked="" type="checkbox"/> | <a href="#">571</a> | 888.7621  | 2663.2645 | 2663.2755 | -4.14  | 1 | (67)  | 7.6e-006 | 1 | K.AGAYDFPSPPEWDTVTPEAKDLINK.M |
| <input checked="" type="checkbox"/> | <a href="#">572</a> | 888.7629  | 2663.2669 | 2663.2755 | -3.24  | 1 | (78)  | 6e-007   | 1 | K.AGAYDFPSPPEWDTVTPEAKDLINK.M |
| <input checked="" type="checkbox"/> | <a href="#">573</a> | 888.7650  | 2663.2732 | 2663.2755 | -0.87  | 1 | (12)  | 2.6      | 1 | K.AGAYDFPSPPEWDTVTPEAKDLINK.M |

2. [IPI00474502](#) Mass: 61164 Score: 2503 Queries matched: 106 emPAI: 1.85  
 Tax\_Id=10090 Gene\_Symbol=Camk2b Calcium/calmodulin-dependent protein kinase type II subunit beta  
 Check to include this hit in error tolerant search or archive report

| Query              | Observed | Mr(expt) | Mr(calc) | ppm   | Miss | Score | Expect | Rank | Peptide       |
|--------------------|----------|----------|----------|-------|------|-------|--------|------|---------------|
| <a href="#">5</a>  | 445.2779 | 444.2706 | 444.2696 | 2.25  | 0    | (7)   | 29     | 1    | K.GAAVK.L     |
| <a href="#">6</a>  | 445.2791 | 444.2718 | 444.2696 | 4.95  | 0    | 8     | 27     | 1    | K.GAAVK.L     |
| <a href="#">71</a> | 452.7382 | 903.4618 | 903.4661 | -4.75 | 0    | 51    | 0.0009 | 1    | K.NSSAITSFK.G |



|                                     |                     |           |           |           |       |   |       |          |   |                                              |
|-------------------------------------|---------------------|-----------|-----------|-----------|-------|---|-------|----------|---|----------------------------------------------|
| <input checked="" type="checkbox"/> | <a href="#">540</a> | 779.7122  | 2336.1148 | 2336.1325 | -7.58 | 1 | (13)  | 2.4      | 1 | R.FTDEYQLYEDIGKGFVSVVR.R                     |
| <input checked="" type="checkbox"/> | <a href="#">541</a> | 779.7162  | 2336.1268 | 2336.1325 | -2.44 | 1 | 73    | 2.3e-006 | 1 | R.FTDEYQLYEDIGKGFVSVVR.R                     |
| <input checked="" type="checkbox"/> | <a href="#">542</a> | 785.0447  | 2352.1123 | 2352.1301 | -7.58 | 0 | (87)  | 8.1e-008 | 1 | R.QTTAPATMSTAASGTTMGLVEQAK.S                 |
| <input checked="" type="checkbox"/> | <a href="#">543</a> | 785.0452  | 2352.1138 | 2352.1301 | -6.95 | 0 | (108) | 6.7e-010 | 1 | R.QTTAPATMSTAASGTTMGLVEQAK.S                 |
| <input checked="" type="checkbox"/> | <a href="#">544</a> | 1177.0774 | 2352.1402 | 2352.1301 | 4.31  | 0 | (60)  | 4.2e-005 | 1 | R.QTTAPATMSTAASGTTMGLVEQAK.S                 |
| <input checked="" type="checkbox"/> | <a href="#">545</a> | 1177.0776 | 2352.1406 | 2352.1301 | 4.48  | 0 | (71)  | 3.7e-006 | 1 | R.QTTAPATMSTAASGTTMGLVEQAK.S                 |
| <input checked="" type="checkbox"/> | <a href="#">546</a> | 1177.0782 | 2352.1418 | 2352.1301 | 4.99  | 0 | 130   | 4.7e-012 | 1 | R.QTTAPATMSTAASGTTMGLVEQAK.S                 |
| <input checked="" type="checkbox"/> | <a href="#">547</a> | 785.4210  | 2353.2412 | 2353.2642 | -9.77 | 0 | (34)  | 0.015    | 1 | K.GSLPPAALEPQTTVIHNPVDGK.E                   |
| <input checked="" type="checkbox"/> | <a href="#">548</a> | 785.4226  | 2353.2460 | 2353.2642 | -7.73 | 0 | 89    | 4.7e-008 | 1 | K.GSLPPAALEPQTTVIHNPVDGK.E                   |
| <input checked="" type="checkbox"/> | <a href="#">549</a> | 785.4229  | 2353.2469 | 2353.2642 | -7.35 | 0 | (70)  | 3.4e-006 | 1 | K.GSLPPAALEPQTTVIHNPVDGK.E                   |
| <input checked="" type="checkbox"/> | <a href="#">550</a> | 785.4230  | 2353.2472 | 2353.2642 | -7.22 | 0 | (82)  | 2.1e-007 | 1 | K.GSLPPAALEPQTTVIHNPVDGK.E                   |
| <input checked="" type="checkbox"/> | <a href="#">551</a> | 785.4232  | 2353.2478 | 2353.2642 | -6.96 | 0 | (80)  | 3.1e-007 | 1 | K.GSLPPAALEPQTTVIHNPVDGK.E                   |
| <input checked="" type="checkbox"/> | <a href="#">552</a> | 785.4244  | 2353.2514 | 2353.2642 | -5.43 | 0 | (71)  | 2.8e-006 | 1 | K.GSLPPAALEPQTTVIHNPVDGK.E                   |
| <input checked="" type="checkbox"/> | <a href="#">553</a> | 790.3778  | 2368.1116 | 2368.1250 | -5.68 | 0 | (88)  | 6.5e-008 | 1 | R.QTTAPATMSTAASGTTMGLVEQAK.S + Oxidation (M) |
| <input checked="" type="checkbox"/> | <a href="#">554</a> | 790.3788  | 2368.1146 | 2368.1250 | -4.42 | 0 | (111) | 3.2e-010 | 1 | R.QTTAPATMSTAASGTTMGLVEQAK.S + Oxidation (M) |
| <input checked="" type="checkbox"/> | <a href="#">555</a> | 1185.0740 | 2368.1334 | 2368.1250 | 3.55  | 0 | (88)  | 6.7e-008 | 1 | R.QTTAPATMSTAASGTTMGLVEQAK.S + Oxidation (M) |
| <input checked="" type="checkbox"/> | <a href="#">556</a> | 1185.0802 | 2368.1458 | 2368.1250 | 8.79  | 0 | (72)  | 2.9e-006 | 1 | R.QTTAPATMSTAASGTTMGLVEQAK.S + Oxidation (M) |

## Proteins matching the same set of peptides:

[IPI00875723](#) Mass: 68686 Score: 2503 Queries matched: 106  
Tax\_Id=10090 Gene\_Symbol=Camk2b 68 kDa protein

3. [IPI00406790](#) Mass: 60593 Score: 1774 Queries matched: 91 emPAI: 0.70  
Tax\_Id=10090 Gene\_Symbol=Camk2d Isoform 4 of Calcium/calmodulin-dependent protein kinase type II subunit delta

Check to include this hit in error tolerant search or archive report

| Query                               | Observed            | Mr(expt)  | Mr(calc)  | ppm       | Miss  | Score | Expect   | Rank     | Peptide         |                  |
|-------------------------------------|---------------------|-----------|-----------|-----------|-------|-------|----------|----------|-----------------|------------------|
| <a href="#">5</a>                   | 445.2779            | 444.2706  | 444.2696  | 2.25      | 0     | (7)   | 29       | 1        | K.GAAVK.L       |                  |
| <a href="#">6</a>                   | 445.2791            | 444.2718  | 444.2696  | 4.95      | 0     | 8     | 27       | 1        | K.GAAVK.L       |                  |
| <a href="#">11</a>                  | 602.3611            | 601.3538  | 601.3435  | 17.2      | 0     | 12    | 12       | 1        | K.DLINK.M       |                  |
| <input checked="" type="checkbox"/> | <a href="#">149</a> | 539.2814  | 1076.5482 | 1076.5502 | -1.81 | 0     | 44       | 0.0034   | 1               | K.IPTGQYAAK.I    |
| <a href="#">161</a>                 | 556.8326            | 1111.6506 | 1111.6349 | 14.1      | 1     | (3)   | 16       | 6        | K.KPDGVKINNK.A  |                  |
| <a href="#">163</a>                 | 556.8347            | 1111.6548 | 1111.6349 | 17.9      | 1     | (1)   | 24       | 7        | K.KPDGVKINNK.A  |                  |
| <a href="#">166</a>                 | 556.8363            | 1111.6580 | 1111.6349 | 20.8      | 1     | (2)   | 21       | 3        | K.KPDGVKINNK.A  |                  |
| <input checked="" type="checkbox"/> | <a href="#">167</a> | 556.8364  | 1111.6582 | 1111.6349 | 21.0  | 1     | 5        | 9.5      | 1               | K.KPDGVKINNK.A   |
| <a href="#">168</a>                 | 556.8366            | 1111.6586 | 1111.6349 | 21.3      | 1     | (3)   | 16       | 2        | K.KPDGVKINNK.A  |                  |
| <input checked="" type="checkbox"/> | <a href="#">174</a> | 559.7805  | 1117.5464 | 1117.5444 | 1.84  | 0     | (22)     | 0.52     | 1               | R.FYFENALSK.S    |
| <input checked="" type="checkbox"/> | <a href="#">175</a> | 559.7811  | 1117.5476 | 1117.5444 | 2.92  | 0     | 27       | 0.16     | 1               | R.FYFENALSK.S    |
| <input checked="" type="checkbox"/> | <a href="#">176</a> | 559.7817  | 1117.5488 | 1117.5444 | 3.99  | 0     | (26)     | 0.2      | 1               | R.FYFENALSK.S    |
| <input checked="" type="checkbox"/> | <a href="#">177</a> | 559.7820  | 1117.5494 | 1117.5444 | 4.53  | 0     | (20)     | 0.76     | 1               | R.FYFENALSK.S    |
| <a href="#">197</a>                 | 574.3211            | 1146.6276 | 1146.6431 | -13.45    | 0     | (62)  | 4.1e-005 | 1        | K.GAILTTMLATR.N |                  |
| <a href="#">198</a>                 | 574.3234            | 1146.6322 | 1146.6431 | -9.43     | 0     | (38)  | 0.011    | 1        | K.GAILTTMLATR.N |                  |
| <a href="#">199</a>                 | 574.3245            | 1146.6344 | 1146.6431 | -7.52     | 0     | (45)  | 0.002    | 1        | K.GAILTTMLATR.N |                  |
| <a href="#">200</a>                 | 574.3247            | 1146.6348 | 1146.6431 | -7.17     | 0     | (54)  | 0.00025  | 1        | K.GAILTTMLATR.N |                  |
| <a href="#">201</a>                 | 574.3251            | 1146.6356 | 1146.6431 | -6.47     | 0     | (52)  | 0.00036  | 1        | K.GAILTTMLATR.N |                  |
| <a href="#">202</a>                 | 574.3251            | 1146.6356 | 1146.6431 | -6.47     | 0     | (38)  | 0.011    | 1        | K.GAILTTMLATR.N |                  |
| <a href="#">203</a>                 | 574.3258            | 1146.6370 | 1146.6431 | -5.25     | 0     | (64)  | 2.4e-005 | 1        | K.GAILTTMLATR.N |                  |
| <a href="#">204</a>                 | 574.3258            | 1146.6370 | 1146.6431 | -5.25     | 0     | (59)  | 8.2e-005 | 1        | K.GAILTTMLATR.N |                  |
| <a href="#">205</a>                 | 574.3262            | 1146.6378 | 1146.6431 | -4.55     | 0     | (59)  | 7.9e-005 | 1        | K.GAILTTMLATR.N |                  |
| <a href="#">206</a>                 | 574.3262            | 1146.6378 | 1146.6431 | -4.55     | 0     | (43)  | 0.0032   | 1        | K.GAILTTMLATR.N |                  |
| <a href="#">207</a>                 | 574.3263            | 1146.6380 | 1146.6431 | -4.38     | 0     | (57)  | 0.00014  | 1        | K.GAILTTMLATR.N |                  |
| <a href="#">208</a>                 | 574.3271            | 1146.6396 | 1146.6431 | -2.98     | 0     | (48)  | 0.00088  | 1        | K.GAILTTMLATR.N |                  |
| <a href="#">209</a>                 | 574.3272            | 1146.6398 | 1146.6431 | -2.81     | 0     | (46)  | 0.0013   | 1        | K.GAILTTMLATR.N |                  |
| <a href="#">210</a>                 | 574.3275            | 1146.6404 | 1146.6431 | -2.28     | 0     | (41)  | 0.0049   | 1        | K.GAILTTMLATR.N |                  |
| <a href="#">211</a>                 | 574.3278            | 1146.6410 | 1146.6431 | -1.76     | 0     | (58)  | 8.4e-005 | 1        | K.GAILTTMLATR.N |                  |
| <a href="#">212</a>                 | 574.3279            | 1146.6412 | 1146.6431 | -1.59     | 0     | (59)  | 7.2e-005 | 1        | K.GAILTTMLATR.N |                  |
| <a href="#">213</a>                 | 574.3279            | 1146.6412 | 1146.6431 | -1.59     | 0     | (59)  | 7.1e-005 | 1        | K.GAILTTMLATR.N |                  |
| <a href="#">214</a>                 | 574.3279            | 1146.6412 | 1146.6431 | -1.59     | 0     | (59)  | 7.1e-005 | 1        | K.GAILTTMLATR.N |                  |
| <a href="#">215</a>                 | 574.3281            | 1146.6416 | 1146.6431 | -1.24     | 0     | (63)  | 3e-005   | 1        | K.GAILTTMLATR.N |                  |
| <a href="#">216</a>                 | 574.3281            | 1146.6416 | 1146.6431 | -1.24     | 0     | 78    | 9.7e-007 | 1        | K.GAILTTMLATR.N |                  |
| <a href="#">217</a>                 | 574.3283            | 1146.6420 | 1146.6431 | -0.89     | 0     | (50)  | 0.00053  | 1        | K.GAILTTMLATR.N |                  |
| <a href="#">218</a>                 | 574.3287            | 1146.6428 | 1146.6431 | -0.19     | 0     | (49)  | 0.00065  | 1        | K.GAILTTMLATR.N |                  |
| <a href="#">219</a>                 | 574.3294            | 1146.6442 | 1146.6431 | 1.03      | 0     | (56)  | 0.00015  | 1        | K.GAILTTMLATR.N |                  |
| <a href="#">220</a>                 | 574.3297            | 1146.6448 | 1146.6431 | 1.55      | 0     | (31)  | 0.048    | 1        | K.GAILTTMLATR.N |                  |
| <a href="#">221</a>                 | 574.3318            | 1146.6490 | 1146.6431 | 5.22      | 0     | (42)  | 0.0029   | 1        | K.GAILTTMLATR.N |                  |
| <input checked="" type="checkbox"/> | <a href="#">303</a> | 664.3068  | 1326.5990 | 1326.5948 | 3.20  | 0     | (52)     | 0.0003   | 1               | R.LTQYMDGSGMPK.T |
| <input checked="" type="checkbox"/> | <a href="#">304</a> | 664.3070  | 1326.5994 | 1326.5948 | 3.50  | 0     | (60)     | 4.5e-005 | 1               | R.LTQYMDGSGMPK.T |
| <input checked="" type="checkbox"/> | <a href="#">305</a> | 664.3091  | 1326.6036 | 1326.5948 | 6.67  | 0     | 71       | 3.9e-006 | 1               | R.LTQYMDGSGMPK.T |
| <a href="#">308</a>                 | 670.8843            | 1339.7540 | 1339.7711 | -12.71    | 0     | (4)   | 18       | 1        | R.DLKPENLLASK.S |                  |
| <a href="#">309</a>                 | 670.8865            | 1339.7584 | 1339.7711 | -9.42     | 0     | (20)  | 0.47     | 1        | R.DLKPENLLASK.S |                  |
| <a href="#">310</a>                 | 670.8892            | 1339.7638 | 1339.7711 | -5.39     | 0     | (27)  | 0.088    | 1        | R.DLKPENLLASK.S |                  |
| <a href="#">311</a>                 | 670.8903            | 1339.7660 | 1339.7711 | -3.75     | 0     | (52)  | 0.00028  | 1        | R.DLKPENLLASK.S |                  |
| <a href="#">312</a>                 | 670.8908            | 1339.7670 | 1339.7711 | -3.00     | 0     | (33)  | 0.018    | 1        | R.DLKPENLLASK.S |                  |
| <a href="#">313</a>                 | 670.8910            | 1339.7674 | 1339.7711 | -2.70     | 0     | (35)  | 0.012    | 1        | R.DLKPENLLASK.S |                  |
| <a href="#">314</a>                 | 670.8913            | 1339.7680 | 1339.7711 | -2.26     | 0     | (53)  | 0.00019  | 1        | R.DLKPENLLASK.S |                  |
| <a href="#">315</a>                 | 670.8915            | 1339.7684 | 1339.7711 | -1.96     | 0     | (60)  | 3.6e-005 | 1        | R.DLKPENLLASK.S |                  |
| <a href="#">316</a>                 | 670.8926            | 1339.7706 | 1339.7711 | -0.32     | 0     | (58)  | 6.1e-005 | 1        | R.DLKPENLLASK.S |                  |
| <a href="#">317</a>                 | 670.8928            | 1339.7710 | 1339.7711 | -0.02     | 0     | (23)  | 0.17     | 1        | R.DLKPENLLASK.S |                  |
| <a href="#">318</a>                 | 670.8931            | 1339.7716 | 1339.7711 | 0.43      | 0     | (37)  | 0.0077   | 1        | R.DLKPENLLASK.S |                  |
| <a href="#">319</a>                 | 670.8934            | 1339.7722 | 1339.7711 | 0.88      | 0     | (61)  | 3e-005   | 1        | R.DLKPENLLASK.S |                  |
| <a href="#">320</a>                 | 670.8937            | 1339.7728 | 1339.7711 | 1.33      | 0     | (66)  | 8.4e-006 | 1        | R.DLKPENLLASK.S |                  |
| <a href="#">321</a>                 | 670.8940            | 1339.7734 | 1339.7711 | 1.77      | 0     | 82    | 2.1e-007 | 1        | R.DLKPENLLASK.S |                  |
| <a href="#">322</a>                 | 670.8940            | 1339.7734 | 1339.7711 | 1.77      | 0     | (67)  | 6.9e-006 | 1        | R.DLKPENLLASK.S |                  |
| <a href="#">323</a>                 | 670.8940            | 1339.7734 | 1339.7711 | 1.77      | 0     | (63)  | 1.7e-005 | 1        | R.DLKPENLLASK.S |                  |
| <a href="#">324</a>                 | 670.8945            | 1339.7744 | 1339.7711 | 2.52      | 0     | (51)  | 0.00028  | 1        | R.DLKPENLLASK.S |                  |
| <a href="#">325</a>                 | 670.8946            | 1339.7746 | 1339.7711 | 2.67      | 0     | (70)  | 3.2e-006 | 1        | R.DLKPENLLASK.S |                  |

|                                                         |                 |                  |                  |             |          |             |                 |          |                                         |
|---------------------------------------------------------|-----------------|------------------|------------------|-------------|----------|-------------|-----------------|----------|-----------------------------------------|
| <a href="#">326</a>                                     | 670.8951        | 1339.7756        | 1339.7711        | 3.42        | 0        | (63)        | 1.6e-005        | 1        | R.DLKPENLLLASK.S                        |
| <a href="#">327</a>                                     | 670.8954        | 1339.7762        | 1339.7711        | 3.86        | 0        | (63)        | 1.6e-005        | 1        | R.DLKPENLLLASK.S                        |
| <a href="#">328</a>                                     | 670.8955        | 1339.7764        | 1339.7711        | 4.01        | 0        | (59)        | 4.4e-005        | 1        | R.DLKPENLLLASK.S                        |
| <input checked="" type="checkbox"/> <a href="#">329</a> | <b>672.3059</b> | <b>1342.5972</b> | <b>1342.5897</b> | <b>5.61</b> | <b>0</b> | <b>(54)</b> | <b>0.00014</b>  | <b>1</b> | <b>R.LTQYMDGSGMPK.T + Oxidation (M)</b> |
| <input checked="" type="checkbox"/> <a href="#">390</a> | <b>809.8870</b> | <b>1617.7594</b> | <b>1617.7562</b> | <b>1.98</b> | <b>0</b> | <b>(55)</b> | <b>0.00018</b>  | <b>1</b> | <b>R.FTDEYQLFPEELGK.G</b>               |
| <input checked="" type="checkbox"/> <a href="#">391</a> | <b>809.8891</b> | <b>1617.7636</b> | <b>1617.7562</b> | <b>4.58</b> | <b>0</b> | <b>66</b>   | <b>1.5e-005</b> | <b>1</b> | <b>R.FTDEYQLFPEELGK.G</b>               |
| <input checked="" type="checkbox"/> <a href="#">392</a> | <b>809.8947</b> | <b>1617.7748</b> | <b>1617.7562</b> | <b>11.5</b> | <b>0</b> | <b>(60)</b> | <b>6.7e-005</b> | <b>1</b> | <b>R.FTDEYQLFPEELGK.G</b>               |
| <a href="#">483</a>                                     | 1040.9476       | 2079.8806        | 2079.9426        | -29.76      | 0        | (74)        | 8.8e-007        | 1        | K.AGAYDFPSPPEWDTVPEAK.D                 |
| <a href="#">484</a>                                     | 1040.9493       | 2079.8840        | 2079.9426        | -28.13      | 0        | (58)        | 3.7e-005        | 1        | K.AGAYDFPSPPEWDTVPEAK.D                 |
| <a href="#">485</a>                                     | 1040.9618       | 2079.9090        | 2079.9426        | -16.11      | 0        | (57)        | 5.8e-005        | 1        | K.AGAYDFPSPPEWDTVPEAK.D                 |
| <a href="#">486</a>                                     | 694.3159        | 2079.9259        | 2079.9426        | -8.02       | 0        | (70)        | 3.7e-006        | 1        | K.AGAYDFPSPPEWDTVPEAK.D                 |
| <a href="#">487</a>                                     | 694.3180        | 2079.9322        | 2079.9426        | -4.99       | 0        | 90          | 3.7e-008        | 1        | K.AGAYDFPSPPEWDTVPEAK.D                 |
| <a href="#">488</a>                                     | 1040.9735       | 2079.9324        | 2079.9426        | -4.86       | 0        | (42)        | 0.0023          | 1        | K.AGAYDFPSPPEWDTVPEAK.D                 |
| <a href="#">489</a>                                     | 1040.9767       | 2079.9388        | 2079.9426        | -1.78       | 0        | (64)        | 1.7e-005        | 1        | K.AGAYDFPSPPEWDTVPEAK.D                 |
| <a href="#">490</a>                                     | 1040.9814       | 2079.9482        | 2079.9426        | 2.74        | 0        | (62)        | 2.8e-005        | 1        | K.AGAYDFPSPPEWDTVPEAK.D                 |
| <a href="#">491</a>                                     | 1040.9825       | 2079.9504        | 2079.9426        | 3.80        | 0        | (75)        | 1.4e-006        | 1        | K.AGAYDFPSPPEWDTVPEAK.D                 |
| <a href="#">558</a>                                     | 888.7586        | 2663.2540        | 2663.2755        | -8.08       | 1        | (47)        | 0.00081         | 1        | K.AGAYDFPSPPEWDTVPEAKDLINK.M            |
| <a href="#">559</a>                                     | 888.7591        | 2663.2555        | 2663.2755        | -7.52       | 1        | (71)        | 3.1e-006        | 1        | K.AGAYDFPSPPEWDTVPEAKDLINK.M            |
| <a href="#">560</a>                                     | 888.7594        | 2663.2564        | 2663.2755        | -7.18       | 1        | (90)        | 4e-008          | 1        | K.AGAYDFPSPPEWDTVPEAKDLINK.M            |
| <a href="#">561</a>                                     | 888.7601        | 2663.2585        | 2663.2755        | -6.39       | 1        | (59)        | 4.9e-005        | 1        | K.AGAYDFPSPPEWDTVPEAKDLINK.M            |
| <a href="#">562</a>                                     | 888.7601        | 2663.2585        | 2663.2755        | -6.39       | 1        | 97          | 8.5e-009        | 1        | K.AGAYDFPSPPEWDTVPEAKDLINK.M            |
| <a href="#">563</a>                                     | 888.7603        | 2663.2591        | 2663.2755        | -6.17       | 1        | (78)        | 7e-007          | 1        | K.AGAYDFPSPPEWDTVPEAKDLINK.M            |
| <a href="#">564</a>                                     | 888.7603        | 2663.2591        | 2663.2755        | -6.17       | 1        | (79)        | 5.1e-007        | 1        | K.AGAYDFPSPPEWDTVPEAKDLINK.M            |
| <a href="#">565</a>                                     | 888.7603        | 2663.2591        | 2663.2755        | -6.17       | 1        | (78)        | 7e-007          | 1        | K.AGAYDFPSPPEWDTVPEAKDLINK.M            |
| <a href="#">566</a>                                     | 888.7608        | 2663.2606        | 2663.2755        | -5.60       | 1        | (74)        | 1.5e-006        | 1        | K.AGAYDFPSPPEWDTVPEAKDLINK.M            |
| <a href="#">567</a>                                     | 888.7608        | 2663.2606        | 2663.2755        | -5.60       | 1        | (52)        | 0.00027         | 1        | K.AGAYDFPSPPEWDTVPEAKDLINK.M            |
| <a href="#">568</a>                                     | 888.7616        | 2663.2630        | 2663.2755        | -4.70       | 1        | (32)        | 0.03            | 1        | K.AGAYDFPSPPEWDTVPEAKDLINK.M            |
| <a href="#">569</a>                                     | 888.7617        | 2663.2633        | 2663.2755        | -4.59       | 1        | (26)        | 0.11            | 1        | K.AGAYDFPSPPEWDTVPEAKDLINK.M            |
| <a href="#">570</a>                                     | 888.7621        | 2663.2645        | 2663.2755        | -4.14       | 1        | (79)        | 4.8e-007        | 1        | K.AGAYDFPSPPEWDTVPEAKDLINK.M            |
| <a href="#">571</a>                                     | 888.7621        | 2663.2645        | 2663.2755        | -4.14       | 1        | (67)        | 7.6e-006        | 1        | K.AGAYDFPSPPEWDTVPEAKDLINK.M            |
| <a href="#">572</a>                                     | 888.7629        | 2663.2669        | 2663.2755        | -3.24       | 1        | (78)        | 6e-007          | 1        | K.AGAYDFPSPPEWDTVPEAKDLINK.M            |
| <a href="#">573</a>                                     | 888.7650        | 2663.2732        | 2663.2755        | -0.87       | 1        | (12)        | 2.6             | 1        | K.AGAYDFPSPPEWDTVPEAKDLINK.M            |

Proteins matching the same set of peptides:

[IPI00858128](#) Mass: 58283 Score: 1774 Queries matched: 91

Tax\_id=10090 Gene\_Symbol=Camk2d calcium/calmodulin-dependent protein kinase type II subunit delta isoform 1

4. [IPI00124695](#) Mass: 60254 Score: 1126 Queries matched: 53 emPAI: 0.61

Tax\_id=10090 Gene\_Symbol=Camk2g Isoform 1 of Calcium/calmodulin-dependent protein kinase type II subunit gamma

Check to include this hit in error tolerant search or archive report

| Query                                                   | Observed        | Mr(expt)         | Mr(calc)         | ppm         | Miss     | Score       | Expect          | Rank     | Peptide                   |
|---------------------------------------------------------|-----------------|------------------|------------------|-------------|----------|-------------|-----------------|----------|---------------------------|
| <a href="#">5</a>                                       | 445.2779        | 444.2706         | 444.2696         | 2.25        | 0        | (7)         | 29              | 1        | K.GAAVK.L                 |
| <a href="#">6</a>                                       | 445.2791        | 444.2718         | 444.2696         | 4.95        | 0        | 8           | 27              | 1        | K.GAAVK.L                 |
| <input checked="" type="checkbox"/> <a href="#">230</a> | <b>580.8067</b> | <b>1159.5988</b> | <b>1159.5913</b> | <b>6.48</b> | <b>0</b> | <b>22</b>   | <b>0.52</b>     | <b>1</b> | <b>K.FYFENLLSK.N</b>      |
| <input checked="" type="checkbox"/> <a href="#">231</a> | <b>580.8068</b> | <b>1159.5990</b> | <b>1159.5913</b> | <b>6.65</b> | <b>0</b> | <b>(22)</b> | <b>0.52</b>     | <b>1</b> | <b>K.FYFENLLSK.N</b>      |
| <a href="#">308</a>                                     | 670.8843        | 1339.7540        | 1339.7711        | -12.71      | 0        | (4)         | 18              | 1        | R.DLKPENLLLASK.C          |
| <a href="#">309</a>                                     | 670.8865        | 1339.7584        | 1339.7711        | -9.42       | 0        | (20)        | 0.47            | 1        | R.DLKPENLLLASK.C          |
| <a href="#">310</a>                                     | 670.8892        | 1339.7638        | 1339.7711        | -5.39       | 0        | (27)        | 0.088           | 1        | R.DLKPENLLLASK.C          |
| <a href="#">311</a>                                     | 670.8903        | 1339.7660        | 1339.7711        | -3.75       | 0        | (52)        | 0.00028         | 1        | R.DLKPENLLLASK.C          |
| <a href="#">312</a>                                     | 670.8908        | 1339.7670        | 1339.7711        | -3.00       | 0        | (33)        | 0.018           | 1        | R.DLKPENLLLASK.C          |
| <a href="#">313</a>                                     | 670.8910        | 1339.7674        | 1339.7711        | -2.70       | 0        | (35)        | 0.012           | 1        | R.DLKPENLLLASK.C          |
| <a href="#">314</a>                                     | 670.8913        | 1339.7680        | 1339.7711        | -2.26       | 0        | (53)        | 0.00019         | 1        | R.DLKPENLLLASK.C          |
| <a href="#">315</a>                                     | 670.8915        | 1339.7684        | 1339.7711        | -1.96       | 0        | (60)        | 3.6e-005        | 1        | R.DLKPENLLLASK.C          |
| <a href="#">316</a>                                     | 670.8926        | 1339.7706        | 1339.7711        | -0.32       | 0        | (58)        | 6.1e-005        | 1        | R.DLKPENLLLASK.C          |
| <a href="#">317</a>                                     | 670.8928        | 1339.7710        | 1339.7711        | -0.02       | 0        | (23)        | 0.17            | 1        | R.DLKPENLLLASK.C          |
| <a href="#">318</a>                                     | 670.8931        | 1339.7716        | 1339.7711        | 0.43        | 0        | (37)        | 0.0077          | 1        | R.DLKPENLLLASK.C          |
| <a href="#">319</a>                                     | 670.8934        | 1339.7722        | 1339.7711        | 0.88        | 0        | (61)        | 3e-005          | 1        | R.DLKPENLLLASK.C          |
| <a href="#">320</a>                                     | 670.8937        | 1339.7728        | 1339.7711        | 1.33        | 0        | (66)        | 8.4e-006        | 1        | R.DLKPENLLLASK.C          |
| <a href="#">321</a>                                     | 670.8940        | 1339.7734        | 1339.7711        | 1.77        | 0        | 82          | 2.1e-007        | 1        | R.DLKPENLLLASK.C          |
| <a href="#">322</a>                                     | 670.8940        | 1339.7734        | 1339.7711        | 1.77        | 0        | (67)        | 6.9e-006        | 1        | R.DLKPENLLLASK.C          |
| <a href="#">323</a>                                     | 670.8940        | 1339.7734        | 1339.7711        | 1.77        | 0        | (63)        | 1.7e-005        | 1        | R.DLKPENLLLASK.C          |
| <a href="#">324</a>                                     | 670.8945        | 1339.7744        | 1339.7711        | 2.52        | 0        | (51)        | 0.00028         | 1        | R.DLKPENLLLASK.C          |
| <a href="#">325</a>                                     | 670.8946        | 1339.7746        | 1339.7711        | 2.67        | 0        | (70)        | 3.2e-006        | 1        | R.DLKPENLLLASK.C          |
| <a href="#">326</a>                                     | 670.8951        | 1339.7756        | 1339.7711        | 3.42        | 0        | (63)        | 1.6e-005        | 1        | R.DLKPENLLLASK.C          |
| <a href="#">327</a>                                     | 670.8954        | 1339.7762        | 1339.7711        | 3.86        | 0        | (63)        | 1.6e-005        | 1        | R.DLKPENLLLASK.C          |
| <a href="#">328</a>                                     | 670.8955        | 1339.7764        | 1339.7711        | 4.01        | 0        | (59)        | 4.4e-005        | 1        | R.DLKPENLLLASK.C          |
| <a href="#">346</a>                                     | 468.5799        | 1402.7179        | 1402.7317        | -9.86       | 0        | (50)        | 0.00069         | 1        | R.LTQYIDGQGRPR.T          |
| <a href="#">347</a>                                     | 468.5800        | 1402.7182        | 1402.7317        | -9.65       | 0        | (51)        | 0.00053         | 1        | R.LTQYIDGQGRPR.T          |
| <a href="#">348</a>                                     | 468.5803        | 1402.7191        | 1402.7317        | -9.01       | 0        | (52)        | 0.00046         | 1        | R.LTQYIDGQGRPR.T          |
| <a href="#">349</a>                                     | 468.5805        | 1402.7197        | 1402.7317        | -8.58       | 0        | (38)        | 0.011           | 1        | R.LTQYIDGQGRPR.T          |
| <a href="#">350</a>                                     | 468.5811        | 1402.7215        | 1402.7317        | -7.30       | 0        | 59          | 8.4e-005        | 1        | R.LTQYIDGQGRPR.T          |
| <a href="#">351</a>                                     | 702.3745        | 1402.7344        | 1402.7317        | 1.96        | 0        | (53)        | 0.00035         | 1        | R.LTQYIDGQGRPR.T          |
| <a href="#">352</a>                                     | 702.3751        | 1402.7356        | 1402.7317        | 2.81        | 0        | (39)        | 0.0085          | 1        | R.LTQYIDGQGRPR.T          |
| <a href="#">353</a>                                     | 702.3760        | 1402.7374        | 1402.7317        | 4.09        | 0        | (43)        | 0.0035          | 1        | R.LTQYIDGQGRPR.T          |
| <a href="#">354</a>                                     | 702.3771        | 1402.7396        | 1402.7317        | 5.66        | 0        | (18)        | 0.99            | 1        | R.LTQYIDGQGRPR.T          |
| <a href="#">355</a>                                     | 702.3782        | 1402.7418        | 1402.7317        | 7.23        | 0        | (26)        | 0.17            | 1        | R.LTQYIDGQGRPR.T          |
| <a href="#">360</a>                                     | 735.4061        | 1468.7976        | 1468.8071        | -6.47       | 0        | 75          | 1.8e-006        | 1        | K.NLINQMLTINPAK.R         |
| <a href="#">361</a>                                     | 735.4121        | 1468.8096        | 1468.8071        | 1.70        | 0        | (71)        | 4.1e-006        | 1        | K.NLINQMLTINPAK.R         |
| <a href="#">362</a>                                     | 735.4124        | 1468.8102        | 1468.8071        | 2.11        | 0        | (41)        | 0.0041          | 1        | K.NLINQMLTINPAK.R         |
| <a href="#">363</a>                                     | 735.4127        | 1468.8108        | 1468.8071        | 2.52        | 0        | (70)        | 4.3e-006        | 1        | K.NLINQMLTINPAK.R         |
| <a href="#">364</a>                                     | 735.4138        | 1468.8130        | 1468.8071        | 4.02        | 0        | (71)        | 3.5e-006        | 1        | K.NLINQMLTINPAK.R         |
| <input checked="" type="checkbox"/> <a href="#">385</a> | <b>802.8809</b> | <b>1603.7472</b> | <b>1603.7406</b> | <b>4.14</b> | <b>0</b> | <b>70</b>   | <b>5.2e-006</b> | <b>1</b> | <b>R.FTDDYQLFPEELGK.G</b> |
| <input checked="" type="checkbox"/> <a href="#">386</a> | <b>802.8814</b> | <b>1603.7482</b> | <b>1603.7406</b> | <b>4.77</b> | <b>0</b> | <b>(60)</b> | <b>5.5e-005</b> | <b>1</b> | <b>R.FTDDYQLFPEELGK.G</b> |
| <input checked="" type="checkbox"/> <a href="#">387</a> | <b>802.8885</b> | <b>1603.7624</b> | <b>1603.7406</b> | <b>13.6</b> | <b>0</b> | <b>(59)</b> | <b>7.2e-005</b> | <b>1</b> | <b>R.FTDDYQLFPEELGK.G</b> |
| <a href="#">397</a>                                     | 542.6334        | 1624.8784        | 1624.9082        | -18.39      | 1        | 45          | 0.0014          | 1        | K.NLINQMLTINPAKR.I        |
| <a href="#">483</a>                                     | 1040.9476       | 2079.8806        | 2079.9426        | -29.76      | 0        | (74)        | 8.8e-007        | 1        | K.AGAYDFPSPPEWDTVPEAK.N   |
| <a href="#">484</a>                                     | 1040.9493       | 2079.8840        | 2079.9426        | -28.13      | 0        | (58)        | 3.7e-005        | 1        | K.AGAYDFPSPPEWDTVPEAK.N   |
| <a href="#">485</a>                                     | 1040.9618       | 2079.9090        | 2079.9426        | -16.11      | 0        | (57)        | 5.8e-005        | 1        | K.AGAYDFPSPPEWDTVPEAK.N   |

|                     |           |           |           |       |   |      |          |   |                         |
|---------------------|-----------|-----------|-----------|-------|---|------|----------|---|-------------------------|
| <a href="#">486</a> | 694.3159  | 2079.9259 | 2079.9426 | -8.02 | 0 | (70) | 3.7e-006 | 1 | K.AGAYDFPSPEDTIVTPEAK.N |
| <a href="#">487</a> | 694.3180  | 2079.9322 | 2079.9426 | -4.99 | 0 | 90   | 3.7e-008 | 1 | K.AGAYDFPSPEDTIVTPEAK.N |
| <a href="#">488</a> | 1040.9735 | 2079.9324 | 2079.9426 | -4.86 | 0 | (42) | 0.0023   | 1 | K.AGAYDFPSPEDTIVTPEAK.N |
| <a href="#">489</a> | 1040.9767 | 2079.9388 | 2079.9426 | -1.78 | 0 | (64) | 1.7e-005 | 1 | K.AGAYDFPSPEDTIVTPEAK.N |
| <a href="#">490</a> | 1040.9814 | 2079.9482 | 2079.9426 | 2.74  | 0 | (62) | 2.8e-005 | 1 | K.AGAYDFPSPEDTIVTPEAK.N |
| <a href="#">491</a> | 1040.9825 | 2079.9504 | 2079.9426 | 3.80  | 0 | (75) | 1.4e-006 | 1 | K.AGAYDFPSPEDTIVTPEAK.N |

## Proteins matching the same set of peptides:

[IPI00228044](#) Mass: 59013 Score: 1126 Queries matched: 53  
Tax\_Id=10090 Gene\_Symbol=Camk2g Isoform 2 of Calcium/calmodulin-dependent protein kinase type II subunit gamma  
[IPI00228045](#) Mass: 56610 Score: 1126 Queries matched: 53  
Tax\_Id=10090 Gene\_Symbol=Camk2g Isoform 3 of Calcium/calmodulin-dependent protein kinase type II subunit gamma

5. [IPI00169463](#) Mass: 50255 Score: 246 Queries matched: 13 emPAI: 0.21

Tax\_Id=10090 Gene\_Symbol=Tubb2c Tubulin beta-2C chain

 Check to include this hit in error tolerant search or archive report

| Query                                                   | Observed | Mr(expt)  | Mr(calc)  | ppm   | Miss | Score | Expect   | Rank | Peptide                            |
|---------------------------------------------------------|----------|-----------|-----------|-------|------|-------|----------|------|------------------------------------|
| <a href="#">148</a>                                     | 539.2706 | 1076.5266 | 1076.5250 | 1.49  | 1    | 13    | 4.6      | 2    | K.IREEXPDR.I                       |
| <input checked="" type="checkbox"/> <a href="#">301</a> | 660.3567 | 1318.6988 | 1318.6955 | 2.53  | 0    | 80    | 7.9e-007 | 1    | R.IMNTFVVPSPK.V                    |
| <input checked="" type="checkbox"/> <a href="#">302</a> | 660.3600 | 1318.7054 | 1318.6955 | 7.54  | 0    | (80)  | 7.5e-007 | 1    | R.IMNTFVVPSPK.V                    |
| <input checked="" type="checkbox"/> <a href="#">382</a> | 801.4147 | 1600.8148 | 1600.8131 | 1.11  | 0    | (76)  | 1.4e-006 | 1    | R.AVLVDLEPGTMSVR.S                 |
| <input checked="" type="checkbox"/> <a href="#">383</a> | 801.4150 | 1600.8154 | 1600.8131 | 1.49  | 0    | 87    | 1.2e-007 | 1    | R.AVLVDLEPGTMSVR.S                 |
| <input checked="" type="checkbox"/> <a href="#">384</a> | 801.4154 | 1600.8162 | 1600.8131 | 1.99  | 0    | (43)  | 0.0028   | 1    | R.AVLVDLEPGTMSVR.S                 |
| <input checked="" type="checkbox"/> <a href="#">432</a> | 846.4415 | 1690.8684 | 1690.8600 | 5.00  | 0    | 46    | 0.0016   | 1    | R.ALTVPQLTQMFDAK.N                 |
| <input checked="" type="checkbox"/> <a href="#">434</a> | 848.9237 | 1695.8328 | 1695.8257 | 4.24  | 0    | (20)  | 0.63     | 1    | K.NSSYFVEWIPNVK.T                  |
| <input checked="" type="checkbox"/> <a href="#">435</a> | 848.9244 | 1695.8342 | 1695.8257 | 5.07  | 0    | 26    | 0.15     | 1    | K.NSSYFVEWIPNVK.T                  |
| <input checked="" type="checkbox"/> <a href="#">439</a> | 854.4377 | 1706.8608 | 1706.8549 | 3.47  | 0    | (13)  | 3.4      | 2    | R.ALTVPQLTQMFDAK.N + Oxidation (M) |
| <input checked="" type="checkbox"/> <a href="#">584</a> | 933.4465 | 2797.3177 | 2797.3361 | -6.60 | 0    | (22)  | 0.23     | 1    | R.SGPFQIFRPDNFVFGQSGAGNNWAK.G      |
| <input checked="" type="checkbox"/> <a href="#">585</a> | 933.4496 | 2797.3270 | 2797.3361 | -3.27 | 0    | (18)  | 0.54     | 1    | R.SGPFQIFRPDNFVFGQSGAGNNWAK.G      |
| <input checked="" type="checkbox"/> <a href="#">586</a> | 933.4506 | 2797.3300 | 2797.3361 | -2.20 | 0    | 27    | 0.073    | 1    | R.SGPFQIFRPDNFVFGQSGAGNNWAK.G      |

6. [IPI00110850](#) Mass: 42052 Score: 234 Queries matched: 7 emPAI: 0.25

Tax\_Id=10090 Gene\_Symbol=Actb Actin, cytoplasmic 1

 Check to include this hit in error tolerant search or archive report

| Query                                                   | Observed | Mr(expt)  | Mr(calc)  | ppm    | Miss | Score | Expect   | Rank | Peptide                |
|---------------------------------------------------------|----------|-----------|-----------|--------|------|-------|----------|------|------------------------|
| <input checked="" type="checkbox"/> <a href="#">233</a> | 581.3168 | 1160.6190 | 1160.6111 | 6.86   | 0    | 35    | 0.025    | 1    | K.EITALAPSTMK.I        |
| <input checked="" type="checkbox"/> <a href="#">452</a> | 895.9521 | 1789.8896 | 1789.8846 | 2.80   | 0    | 96    | 1.4e-008 | 1    | K.SYELPDGQVITIGNER.F   |
| <input checked="" type="checkbox"/> <a href="#">453</a> | 895.9536 | 1789.8926 | 1789.8846 | 4.48   | 0    | (87)  | 1.1e-007 | 1    | K.SYELPDGQVITIGNER.F   |
| <input checked="" type="checkbox"/> <a href="#">468</a> | 652.0190 | 1953.0352 | 1953.0571 | -11.23 | 0    | (56)  | 0.00011  | 1    | R.VAPEEHPVLLTEAPLNPK.A |
| <input checked="" type="checkbox"/> <a href="#">469</a> | 652.0204 | 1953.0394 | 1953.0571 | -9.08  | 0    | (30)  | 0.044    | 2    | R.VAPEEHPVLLTEAPLNPK.A |
| <input checked="" type="checkbox"/> <a href="#">470</a> | 652.0221 | 1953.0445 | 1953.0571 | -6.46  | 0    | 63    | 2.1e-005 | 1    | R.VAPEEHPVLLTEAPLNPK.A |
| <input checked="" type="checkbox"/> <a href="#">471</a> | 652.0244 | 1953.0514 | 1953.0571 | -2.93  | 0    | (60)  | 4.2e-005 | 1    | R.VAPEEHPVLLTEAPLNPK.A |

## Proteins matching the same set of peptides:

[IPI00136929](#) Mass: 44029 Score: 234 Queries matched: 7  
Tax\_Id=10090 Gene\_Symbol=Actg1 Gamma actin-like protein  
[IPI00473320](#) Mass: 42115 Score: 234 Queries matched: 7  
Tax\_Id=10090 Gene\_Symbol=Actb Putative uncharacterized protein  
[IPI00652436](#) Mass: 42053 Score: 234 Queries matched: 7  
Tax\_Id=10090 Gene\_Symbol=Actg1 Putative uncharacterized protein  
[IPI00874482](#) Mass: 42108 Score: 234 Queries matched: 7  
Tax\_Id=10090 Gene\_Symbol=Actg1 Actin, cytoplasmic 2

7. [IPI00115546](#) Mass: 40524 Score: 208 Queries matched: 3 emPAI: 0.17

Tax\_Id=10090 Gene\_Symbol=Gnao1 Isoform Alpha-2 of Guanine nucleotide-binding protein G(o) subunit alpha

 Check to include this hit in error tolerant search or archive report

| Query                                                   | Observed | Mr(expt)  | Mr(calc)  | ppm  | Miss | Score | Expect   | Rank | Peptide                |
|---------------------------------------------------------|----------|-----------|-----------|------|------|-------|----------|------|------------------------|
| <input checked="" type="checkbox"/> <a href="#">431</a> | 838.4230 | 1674.8314 | 1674.8213 | 6.06 | 0    | 99    | 8e-009   | 1    | R.IGAGYQPTQDILR.T      |
| <input checked="" type="checkbox"/> <a href="#">472</a> | 979.4432 | 1956.8718 | 1956.8631 | 4.48 | 0    | (86)  | 9.3e-008 | 1    | R.MEDTEPFSAEILLSAMMR.L |
| <input checked="" type="checkbox"/> <a href="#">473</a> | 979.4452 | 1956.8758 | 1956.8631 | 6.52 | 0    | 92    | 2.4e-008 | 1    | R.MEDTEPFSAEILLSAMMR.L |

## Proteins matching the same set of peptides:

[IPI00230192](#) Mass: 40629 Score: 208 Queries matched: 3  
Tax\_Id=10090 Gene\_Symbol=Gnao1 Isoform Alpha-1 of Guanine nucleotide-binding protein G(o) subunit alpha  
[IPI00969970](#) Mass: 20777 Score: 208 Queries matched: 3  
Tax\_Id=10090 Gene\_Symbol=Gnao1 Uncharacterized protein

8. [IPI00221528](#) Mass: 42319 Score: 172 Queries matched: 6 emPAI: 0.16

Tax\_Id=10090 Gene\_Symbol=Actb12 Beta-actin-like protein 2

 Check to include this hit in error tolerant search or archive report

| Query                                                   | Observed | Mr(expt)  | Mr(calc)  | ppm    | Miss | Score | Expect   | Rank | Peptide                |
|---------------------------------------------------------|----------|-----------|-----------|--------|------|-------|----------|------|------------------------|
| <a href="#">452</a>                                     | 895.9521 | 1789.8896 | 1789.8846 | 2.80   | 0    | 96    | 1.4e-008 | 1    | R.SYELPDGQVITIGNER.F   |
| <a href="#">453</a>                                     | 895.9536 | 1789.8926 | 1789.8846 | 4.48   | 0    | (87)  | 1.1e-007 | 1    | R.SYELPDGQVITIGNER.F   |
| <a href="#">468</a>                                     | 652.0190 | 1953.0352 | 1953.0571 | -11.23 | 0    | 48    | 0.00078  | 2    | R.VAPDEHPILLTEAPLNPK.I |
| <input checked="" type="checkbox"/> <a href="#">469</a> | 652.0204 | 1953.0394 | 1953.0571 | -9.08  | 0    | (31)  | 0.035    | 1    | R.VAPDEHPILLTEAPLNPK.I |
| <a href="#">470</a>                                     | 652.0221 | 1953.0445 | 1953.0571 | -6.46  | 0    | (43)  | 0.0023   | 2    | R.VAPDEHPILLTEAPLNPK.I |
| <a href="#">471</a>                                     | 652.0244 | 1953.0514 | 1953.0571 | -2.93  | 0    | (32)  | 0.028    | 2    | R.VAPDEHPILLTEAPLNPK.I |



9. [IPI00112251](#) Mass: 50842 Score: 162 Queries matched: 8 emPAI: 0.21  
Tax\_Id=10090 Gene\_Symbol=Tubb3 Tubulin beta-3 chain

Check to include this hit in error tolerant search or archive report

| Query                                                   | Observed | Mr(expt)  | Mr(calc)  | ppm   | Miss | Score | Expect   | Rank | Peptide                            |
|---------------------------------------------------------|----------|-----------|-----------|-------|------|-------|----------|------|------------------------------------|
| <a href="#">301</a>                                     | 660.3567 | 1318.6988 | 1318.6955 | 2.53  | 0    | 80    | 7.9e-007 | 1    | R.IMNTFSVVVSPK.V                   |
| <a href="#">302</a>                                     | 660.3600 | 1318.7054 | 1318.6955 | 7.54  | 0    | (80)  | 7.5e-007 | 1    | R.IMNTFSVVVSPK.V                   |
| <input checked="" type="checkbox"/> <a href="#">388</a> | 808.4205 | 1614.8264 | 1614.8287 | -1.40 | 0    | (38)  | 0.011    | 1    | R.AILVDLEPGTMSVR.S                 |
| <input checked="" type="checkbox"/> <a href="#">389</a> | 808.4229 | 1614.8312 | 1614.8287 | 1.57  | 0    | 52    | 0.00045  | 1    | R.AILVDLEPGTMSVR.S                 |
| <a href="#">432</a>                                     | 846.4415 | 1690.8684 | 1690.8600 | 5.00  | 0    | 46    | 0.0016   | 1    | R.ALTVPQLTQMFDAK.N                 |
| <a href="#">434</a>                                     | 848.9237 | 1695.8328 | 1695.8257 | 4.24  | 0    | (20)  | 0.63     | 1    | K.NSSYFVEWIPNNVK.V                 |
| <a href="#">435</a>                                     | 848.9244 | 1695.8342 | 1695.8257 | 5.07  | 0    | 26    | 0.15     | 1    | K.NSSYFVEWIPNNVK.V                 |
| <a href="#">439</a>                                     | 854.4377 | 1706.8608 | 1706.8549 | 3.47  | 0    | (13)  | 3.4      | 2    | R.ALTVPQLTQMFDAK.N + Oxidation (M) |

10. [IPI00323571](#) Mass: 35901 Score: 147 Queries matched: 8 emPAI: 0.42  
Tax\_Id=10090 Gene\_Symbol=ApoE Apolipoprotein E

Check to include this hit in error tolerant search or archive report

| Query                                                   | Observed | Mr(expt)  | Mr(calc)  | ppm   | Miss | Score | Expect   | Rank | Peptide                |
|---------------------------------------------------------|----------|-----------|-----------|-------|------|-------|----------|------|------------------------|
| <input checked="" type="checkbox"/> <a href="#">92</a>  | 484.7768 | 967.5390  | 967.5451  | -6.23 | 0    | (56)  | 0.00011  | 1    | R.LGPLVEQGR.Q          |
| <input checked="" type="checkbox"/> <a href="#">93</a>  | 484.7803 | 967.5460  | 967.5451  | 1.01  | 0    | 57    | 8.5e-005 | 1    | R.LGPLVEQGR.Q          |
| <input checked="" type="checkbox"/> <a href="#">144</a> | 538.2992 | 1074.5838 | 1074.5822 | 1.56  | 0    | 46    | 0.0024   | 1    | R.LQAEIFQAR.L          |
| <input checked="" type="checkbox"/> <a href="#">145</a> | 538.2996 | 1074.5846 | 1074.5822 | 2.31  | 0    | (43)  | 0.0043   | 1    | R.LQAEIFQAR.L          |
| <a href="#">147</a>                                     | 538.3003 | 1074.5860 | 1074.5822 | 3.61  | 0    | (14)  |          | 3    | R.LQAEIFQAR.L          |
| <input checked="" type="checkbox"/> <a href="#">234</a> | 581.7838 | 1161.5530 | 1161.5448 | 7.10  | 0    | 42    | 0.0054   | 1    | K.MEEQTTQIR.L          |
| <input checked="" type="checkbox"/> <a href="#">381</a> | 800.4018 | 1598.7890 | 1598.7787 | 6.44  | 0    | 74    | 2.7e-006 | 1    | K.ELEEGLGVAEETRA       |
| <input checked="" type="checkbox"/> <a href="#">476</a> | 997.5348 | 1993.0550 | 1993.0480 | 3.53  | 0    | 13    | 2.7      | 1    | K.IQASVATNPITFVAQENQ.- |

11. [IPI00117352](#) Mass: 50095 Score: 141 Queries matched: 11 emPAI: 0.14  
Tax\_Id=10090 Gene\_Symbol=Tubb5 Tubulin beta-5 chain

Check to include this hit in error tolerant search or archive report

| Query                                                   | Observed | Mr(expt)  | Mr(calc)  | ppm   | Miss | Score | Expect   | Rank | Peptide                       |
|---------------------------------------------------------|----------|-----------|-----------|-------|------|-------|----------|------|-------------------------------|
| <a href="#">148</a>                                     | 539.2706 | 1076.5266 | 1076.5250 | 1.49  | 1    | 13    | 4.6      | 2    | K.IREYVDR.I                   |
| <a href="#">301</a>                                     | 660.3567 | 1318.6988 | 1318.6955 | 2.53  | 0    | 80    | 7.9e-007 | 1    | R.IMNTFSVVVSPK.V              |
| <a href="#">302</a>                                     | 660.3600 | 1318.7054 | 1318.6955 | 7.54  | 0    | (80)  | 7.5e-007 | 1    | R.IMNTFSVVVSPK.V              |
| <a href="#">388</a>                                     | 808.4205 | 1614.8264 | 1614.8287 | -1.40 | 0    | (38)  | 0.011    | 1    | R.AILVDLEPGTMSVR.S            |
| <a href="#">389</a>                                     | 808.4229 | 1614.8312 | 1614.8287 | 1.57  | 0    | 52    | 0.00045  | 1    | R.AILVDLEPGTMSVR.S            |
| <input checked="" type="checkbox"/> <a href="#">429</a> | 830.4437 | 1658.8728 | 1658.8879 | -9.10 | 0    | 20    | 0.54     | 1    | R.ALTVPQLTQMFDAK.N            |
| <a href="#">434</a>                                     | 848.9237 | 1695.8328 | 1695.8257 | 4.24  | 0    | (20)  | 0.63     | 1    | K.NSSYFVEWIPNNVK.T            |
| <a href="#">435</a>                                     | 848.9244 | 1695.8342 | 1695.8257 | 5.07  | 0    | 26    | 0.15     | 1    | K.NSSYFVEWIPNNVK.T            |
| <a href="#">584</a>                                     | 933.4465 | 2797.3177 | 2797.3361 | -6.60 | 0    | (22)  | 0.23     | 1    | R.SGPFQIFRPDVFVFGQSGAGNNWAK.G |
| <a href="#">585</a>                                     | 933.4496 | 2797.3270 | 2797.3361 | -3.27 | 0    | (18)  | 0.54     | 1    | R.SGPFQIFRPDVFVFGQSGAGNNWAK.G |
| <a href="#">586</a>                                     | 933.4506 | 2797.3300 | 2797.3361 | -2.20 | 0    | 27    | 0.073    | 1    | R.SGPFQIFRPDVFVFGQSGAGNNWAK.G |

12. [IPI00138892](#) Mass: 15004 Score: 133 Queries matched: 4 emPAI: 0.23  
Tax\_Id=10090 Gene\_Symbol=Uba52 Ubiquitin-60S ribosomal protein L40

Check to include this hit in error tolerant search or archive report

| Query                                                   | Observed | Mr(expt)  | Mr(calc)  | ppm   | Miss | Score | Expect   | Rank | Peptide              |
|---------------------------------------------------------|----------|-----------|-----------|-------|------|-------|----------|------|----------------------|
| <input checked="" type="checkbox"/> <a href="#">448</a> | 894.4662 | 1786.9178 | 1786.9200 | -1.21 | 0    | (47)  | 0.0012   | 1    | K.TITLEVEPSDTIENVK.A |
| <input checked="" type="checkbox"/> <a href="#">449</a> | 894.4691 | 1786.9236 | 1786.9200 | 2.03  | 0    | (65)  | 2.1e-005 | 1    | K.TITLEVEPSDTIENVK.A |
| <input checked="" type="checkbox"/> <a href="#">450</a> | 894.4700 | 1786.9254 | 1786.9200 | 3.04  | 0    | 71    | 4.7e-006 | 1    | K.TITLEVEPSDTIENVK.A |
| <input checked="" type="checkbox"/> <a href="#">451</a> | 894.4707 | 1786.9268 | 1786.9200 | 3.83  | 0    | (53)  | 0.00033  | 1    | K.TITLEVEPSDTIENVK.A |

Proteins matching the same set of peptides:

[IPI00470152](#) Mass: 18282 Score: 133 Queries matched: 4  
Tax\_Id=10090 Gene\_Symbol=Rps27a Ubiquitin-40S ribosomal protein S27a

[IPI00895319](#) Mass: 22277 Score: 133 Queries matched: 4  
Tax\_Id=10090 Gene\_Symbol=2810422J05Rik 22 kDa protein

[IPI00895479](#) Mass: 27181 Score: 133 Queries matched: 4  
Tax\_Id=10090 Gene\_Symbol=2810422J05Rik 27 kDa protein

[IPI00918763](#) Mass: 11021 Score: 133 Queries matched: 4  
Tax\_Id=10090 Gene\_Symbol=Uba52 Ubiquitin subunit 1

[IPI00750889](#) Mass: 22822 Score: 133 Queries matched: 4  
Tax\_Id=10090 Gene\_Symbol=Ubc Ubc protein

[IPI00923013](#) Mass: 26603 Score: 133 Queries matched: 4  
Tax\_Id=10090 Gene\_Symbol=Ubb Ubiquitin B

[IPI00923037](#) Mass: 22578 Score: 133 Queries matched: 4  
Tax\_Id=10090 Gene\_Symbol=Ubc Putative uncharacterized protein

[IPI00139518](#) Mass: 34348 Score: 133 Queries matched: 4  
Tax\_Id=10090 Gene\_Symbol=Ubb Polyubiquitin-B

[IPI00755916](#) Mass: 82614 Score: 133 Queries matched: 4  
Tax\_Id=10090 Gene\_Symbol=Ubc ubiquitin

[IPI00969323](#) Mass: 82603 Score: 133 Queries matched: 4  
Tax\_Id=10090 Gene\_Symbol=Ubc Polyubiquitin-C

13. [IPI00755181](#) Mass: 57178 Score: 132 Queries matched: 5 emPAI: 0.12  
Tax\_Id=10090 Gene\_Symbol=Krt10 keratin, type I cytoskeletal 10

Check to include this hit in error tolerant search or archive report

| Query                                                   | Observed | Mr(expt)  | Mr(calc)  | ppm  | Miss | Score | Expect | Rank | Peptide      |
|---------------------------------------------------------|----------|-----------|-----------|------|------|-------|--------|------|--------------|
| <input checked="" type="checkbox"/> <a href="#">154</a> | 545.7697 | 1089.5248 | 1089.5237 | 1.07 | 0    | (46)  | 0.002  | 1    | K.VTMQLNDR.L |

|                                     |                     |          |           |           |      |   |      |          |   |                  |
|-------------------------------------|---------------------|----------|-----------|-----------|------|---|------|----------|---|------------------|
| <input checked="" type="checkbox"/> | <a href="#">155</a> | 545.7701 | 1089.5256 | 1089.5237 | 1.80 | 0 | 64   | 3.4e-005 | 1 | K.VTMQNLNDR.L    |
| <input checked="" type="checkbox"/> | <a href="#">156</a> | 545.7711 | 1089.5276 | 1089.5237 | 3.64 | 0 | (62) | 5.4e-005 | 1 | K.VTMQNLNDR.L    |
| <input checked="" type="checkbox"/> | <a href="#">334</a> | 691.3312 | 1380.6478 | 1380.6408 | 5.08 | 0 | (52) | 0.00036  | 1 | R.ALEESNYELEGK.I |
| <input checked="" type="checkbox"/> | <a href="#">335</a> | 691.3317 | 1380.6488 | 1380.6408 | 5.80 | 0 | 61   | 4.3e-005 | 1 | R.ALEESNYELEGK.I |

## Proteins matching the same set of peptides:

[IPI00798492](#) Mass: 57906 Score: 132 Queries matched: 5  
Tax\_Id=10090 Gene\_Symbol=Krt10 Isoform 1 of Keratin, type I cytoskeletal 10  
[IPI00828744](#) Mass: 57197 Score: 132 Queries matched: 5  
Tax\_Id=10090 Gene\_Symbol=Krt10 Isoform 2 of Keratin, type I cytoskeletal 10

14. [IPI00122094](#) Mass: 85656 Score: 123 Queries matched: 2 emPAI: 0.04

Tax\_Id=10090 Gene\_Symbol=Dlg4 Isoform 2 of Disks large homolog 4

Check to include this hit in error tolerant search or archive report

| Query                               | Observed            | Mr(expt) | Mr(calc)  | ppm       | Miss Score | Expect | Rank | Peptide  |   |                        |
|-------------------------------------|---------------------|----------|-----------|-----------|------------|--------|------|----------|---|------------------------|
| <input checked="" type="checkbox"/> | <a href="#">441</a> | 857.9645 | 1713.9144 | 1713.9090 | 3.18       | 0      | 83   | 2.7e-007 | 1 | R.VIEDLSGPIYIWPV.PAR.E |
| <input checked="" type="checkbox"/> | <a href="#">442</a> | 857.9650 | 1713.9154 | 1713.9090 | 3.76       | 0      | (68) | 8e-006   | 1 | R.VIEDLSGPIYIWPV.PAR.E |

## Proteins matching the same set of peptides:

[IPI00622720](#) Mass: 80765 Score: 123 Queries matched: 2  
Tax\_Id=10090 Gene\_Symbol=Dlg4 Isoform 1 of Disks large homolog 4  
[IPI00626797](#) Mass: 80395 Score: 123 Queries matched: 2  
Tax\_Id=10090 Gene\_Symbol=Dlg4 Isoform 3 of Disks large homolog 4

15. [IPI00131366](#) Mass: 60627 Score: 114 Queries matched: 4 emPAI: 0.05

Tax\_Id=10090 Gene\_Symbol=Krt6b Keratin, type II cytoskeletal 6B

Check to include this hit in error tolerant search or archive report

| Query                               | Observed            | Mr(expt) | Mr(calc)  | ppm       | Miss Score | Expect | Rank | Peptide  |   |                  |
|-------------------------------------|---------------------|----------|-----------|-----------|------------|--------|------|----------|---|------------------|
| <input checked="" type="checkbox"/> | <a href="#">288</a> | 651.8555 | 1301.6964 | 1301.7078 | -8.74      | 0      | (30) | 0.072    | 1 | R.SLDLDSIIAEVK.A |
| <input checked="" type="checkbox"/> | <a href="#">289</a> | 651.8582 | 1301.7018 | 1301.7078 | -4.59      | 0      | (45) | 0.0022   | 1 | R.SLDLDSIIAEVK.A |
| <input checked="" type="checkbox"/> | <a href="#">290</a> | 651.8605 | 1301.7064 | 1301.7078 | -1.06      | 0      | (60) | 6.3e-005 | 1 | R.SLDLDSIIAEVK.A |
| <input checked="" type="checkbox"/> | <a href="#">291</a> | 651.8612 | 1301.7078 | 1301.7078 | 0.02       | 0      | 67   | 1.3e-005 | 1 | R.SLDLDSIIAEVK.A |

## Proteins matching the same set of peptides:

[IPI00131368](#) Mass: 59641 Score: 114 Queries matched: 4  
Tax\_Id=10090 Gene\_Symbol=Krt6a Keratin, type II cytoskeletal 6A  
[IPI00139301](#) Mass: 61957 Score: 114 Queries matched: 4  
Tax\_Id=10090 Gene\_Symbol=Krt5 Keratin, type II cytoskeletal 5  
[IPI00221797](#) Mass: 59932 Score: 114 Queries matched: 4  
Tax\_Id=10090 Gene\_Symbol=Krt75 Keratin, type II cytoskeletal 75  
[IPI00330480](#) Mass: 35315 Score: 114 Queries matched: 4  
Tax\_Id=10090 Gene\_Symbol=- 35 kDa protein  
[IPI00470126](#) Mass: 60553 Score: 114 Queries matched: 4  
Tax\_Id=10090 Gene\_Symbol=Krt5 Uncharacterized protein  
[IPI00762364](#) Mass: 50641 Score: 114 Queries matched: 4  
Tax\_Id=10090 Gene\_Symbol=Krt6a Uncharacterized protein  
[IPI00785403](#) Mass: 59832 Score: 114 Queries matched: 4  
Tax\_Id=10090 Gene\_Symbol=Krt6b keratin, type II cytoskeletal 6B

16. [IPI00134997](#) Mass: 106777 Score: 112 Queries matched: 1 emPAI: 0.03

Tax\_Id=10090 Gene\_Symbol=Dlgap3 Disks large-associated protein 3

Check to include this hit in error tolerant search or archive report

| Query                               | Observed            | Mr(expt) | Mr(calc)  | ppm       | Miss Score | Expect | Rank | Peptide  |   |                       |
|-------------------------------------|---------------------|----------|-----------|-----------|------------|--------|------|----------|---|-----------------------|
| <input checked="" type="checkbox"/> | <a href="#">369</a> | 751.8735 | 1501.7324 | 1501.7274 | 3.39       | 0      | 112  | 4.7e-010 | 1 | R.GPAGPGPGGGAAPPEAR.S |

## Proteins matching the same set of peptides:

[IPI00648401](#) Mass: 105576 Score: 112 Queries matched: 1  
Tax\_Id=10090 Gene\_Symbol=Dlgap3 Discs, large (Drosophila) homolog-associated protein 3

17. [IPI00122928](#) Mass: 50514 Score: 97 Queries matched: 6 emPAI: 0.13

Tax\_Id=10090 Gene\_Symbol=Tubb6 Tubulin beta-6 chain

Check to include this hit in error tolerant search or archive report

| Query                               | Observed            | Mr(expt)  | Mr(calc)  | ppm       | Miss Score | Expect | Rank   | Peptide  |                                      |                 |
|-------------------------------------|---------------------|-----------|-----------|-----------|------------|--------|--------|----------|--------------------------------------|-----------------|
| <a href="#">148</a>                 | 539.2706            | 1076.5266 | 1076.5250 | 1.49      | 1          | 13     | 4.6    | 2        | K.IREYYPDR.I                         |                 |
| <input checked="" type="checkbox"/> | <a href="#">331</a> | 676.3433  | 1350.6720 | 1350.6676 | 3.31       | 0      | 78     | 1.2e-006 | 1                                    | R.IMNTFVMPSPK.V |
| <a href="#">432</a>                 | 846.4415            | 1690.8684 | 1690.8600 | 5.00      | 0          | 46     | 0.0016 | 1        | R.ALTVPELTQQMFDPAK.N                 |                 |
| <a href="#">434</a>                 | 848.9237            | 1695.8328 | 1695.8257 | 4.24      | 0          | (20)   | 0.63   | 1        | K.NSSYPVEWIPNNVK.V                   |                 |
| <a href="#">435</a>                 | 848.9244            | 1695.8342 | 1695.8257 | 5.07      | 0          | 26     | 0.15   | 1        | K.NSSYPVEWIPNNVK.V                   |                 |
| <a href="#">439</a>                 | 854.4377            | 1706.8608 | 1706.8549 | 3.47      | 0          | (13)   | 3.4    | 2        | R.ALTVPELTQQMFDPAK.N + Oxidation (M) |                 |

18. [IPI00109061](#) Mass: 50377 Score: 96 Queries matched: 10 emPAI: 0.14

Tax\_Id=10090 Gene\_Symbol=Tubb2b Tubulin beta-2B chain

Check to include this hit in error tolerant search or archive report

| Query               | Observed | Mr(expt)  | Mr(calc)  | ppm   | Miss Score | Expect | Rank     | Peptide |                     |
|---------------------|----------|-----------|-----------|-------|------------|--------|----------|---------|---------------------|
| <a href="#">148</a> | 539.2706 | 1076.5266 | 1076.5250 | 1.49  | 1          | 13     | 4.6      | 2       | K.IREYYPDR.I        |
| <a href="#">331</a> | 676.3433 | 1350.6720 | 1350.6676 | 3.31  | 0          | 78     | 1.2e-006 | 1       | R.IMNTFVMPSPK.V     |
| <a href="#">388</a> | 808.4205 | 1614.8264 | 1614.8287 | -1.40 | 0          | (38)   | 0.011    | 1       | R.AILVDLEPGTMSVRS.S |
| <a href="#">389</a> | 808.4229 | 1614.8312 | 1614.8287 | 1.57  | 0          | 52     | 0.00045  | 1       | R.AILVDLEPGTMSVRS.S |

|                                     |                     |           |           |           |      |      |       |      |                               |                     |
|-------------------------------------|---------------------|-----------|-----------|-----------|------|------|-------|------|-------------------------------|---------------------|
| <a href="#">434</a>                 | 848.9237            | 1695.8328 | 1695.8257 | 4.24      | 0    | (20) | 0.63  | 1    | K.NSSYFVEWIPNNVK.T            |                     |
| <a href="#">435</a>                 | 848.9244            | 1695.8342 | 1695.8257 | 5.07      | 0    | 26   | 0.15  | 1    | K.NSSYFVEWIPNNVK.T            |                     |
| <input checked="" type="checkbox"/> | <a href="#">439</a> | 854.4377  | 1706.8608 | 1706.8549 | 3.47 | 0    | 20    | 0.61 | 1                             | R.ALTVPQLTQMPFDSK.N |
| <a href="#">584</a>                 | 933.4465            | 2797.3177 | 2797.3361 | -6.60     | 0    | (22) | 0.23  | 1    | R.SGPFQIFRPDNFVFGQSGAGNNWAK.G |                     |
| <a href="#">585</a>                 | 933.4496            | 2797.3270 | 2797.3361 | -3.27     | 0    | (18) | 0.54  | 1    | R.SGPFQIFRPDNFVFGQSGAGNNWAK.G |                     |
| <a href="#">586</a>                 | 933.4506            | 2797.3300 | 2797.3361 | -2.20     | 0    | 27   | 0.073 | 1    | R.SGPFQIFRPDNFVFGQSGAGNNWAK.G |                     |

## Proteins matching the same set of peptides:

[IPI00338039](#) Mass: 50274 Score: 96 Queries matched: 10  
Tax\_Id=10090 Gene\_Symbol=Tubb2a Tubulin beta-2A chain

19. [IPI00462140](#) Mass: 61379 Score: 94 Queries matched: 3 emPAI: 0.05  
Tax\_Id=10090 Gene\_Symbol=Krt77 Keratin, type II cytoskeletal 1b

Check to include this hit in error tolerant search or archive report

| Query                               | Observed            | Mr(expt) | Mr(calc)  | ppm       | Miss   | Score | Expect | Rank   | Peptide |                  |
|-------------------------------------|---------------------|----------|-----------|-----------|--------|-------|--------|--------|---------|------------------|
| <input checked="" type="checkbox"/> | <a href="#">141</a> | 532.2756 | 1062.5366 | 1062.5709 | -32.26 | 0     | 6      | 21     | 1       | R.AQYEIIAQK.S    |
| <input checked="" type="checkbox"/> | <a href="#">367</a> | 738.3973 | 1474.7800 | 1474.7780 | 1.40   | 0     | (61)   | 5e-005 | 1       | R.FLEQQNQVLQTK.W |
| <input checked="" type="checkbox"/> | <a href="#">368</a> | 738.3973 | 1474.7800 | 1474.7780 | 1.40   | 0     | 63     | 3e-005 | 1       | R.FLEQQNQVLQTK.W |

20. [IPI00420970](#) Mass: 55340 Score: 94 Queries matched: 3 emPAI: 0.06  
Tax\_Id=10090 Gene\_Symbol=Krt74 Keratin, type II cytoskeletal 74

Check to include this hit in error tolerant search or archive report

| Query               | Observed | Mr(expt)  | Mr(calc)  | ppm   | Miss | Score | Expect | Rank | Peptide          |
|---------------------|----------|-----------|-----------|-------|------|-------|--------|------|------------------|
| <a href="#">111</a> | 519.2660 | 1036.5174 | 1036.5189 | -1.41 | 0    | 5     | 24     | 5    | R.YEVEITQR.T     |
| <a href="#">367</a> | 738.3973 | 1474.7800 | 1474.7780 | 1.40  | 0    | (61)  | 5e-005 | 1    | R.FLEQQNQVLQTK.W |
| <a href="#">368</a> | 738.3973 | 1474.7800 | 1474.7780 | 1.40  | 0    | 63    | 3e-005 | 1    | R.FLEQQNQVLQTK.W |

21. [IPI00131209](#) Mass: 52420 Score: 94 Queries matched: 4 emPAI: 0.06  
Tax\_Id=10090 Gene\_Symbol=Krt16 Keratin intermediate filament 16a

Check to include this hit in error tolerant search or archive report

| Query               | Observed | Mr(expt)  | Mr(calc)  | ppm  | Miss | Score | Expect   | Rank | Peptide                         |
|---------------------|----------|-----------|-----------|------|------|-------|----------|------|---------------------------------|
| <a href="#">154</a> | 545.7697 | 1089.5248 | 1089.5237 | 1.07 | 0    | (46)  | 0.002    | 1    | K.VTMQNLNDR.L                   |
| <a href="#">155</a> | 545.7701 | 1089.5256 | 1089.5237 | 1.80 | 0    | 64    | 3.4e-005 | 1    | K.VTMQNLNDR.L                   |
| <a href="#">156</a> | 545.7711 | 1089.5276 | 1089.5237 | 3.64 | 0    | (62)  | 5.4e-005 | 1    | K.VTMQNLNDR.L                   |
| <a href="#">227</a> | 577.7924 | 1153.5702 | 1153.5220 | 41.9 | 0    | 7     | 13       | 2    | R.MSSILAGGSCR.A + Oxidation (M) |

## Proteins matching the same set of peptides:

[IPI00227140](#) Mass: 53176 Score: 94 Queries matched: 4

Tax\_Id=10090 Gene\_Symbol=Krt14 Keratin, type I cytoskeletal 14

[IPI00874585](#) Mass: 51973 Score: 94 Queries matched: 4

Tax\_Id=10090 Gene\_Symbol=Krt16 Keratin, type I cytoskeletal 16

22. [IPI00348328](#) Score: 90 Queries matched: 3  
Tax\_Id=10090 Gene\_Symbol=Krt78 keratin Kb40

Check to include this hit in error tolerant search or archive report

| Query                               | Observed            | Mr(expt)  | Mr(calc)  | ppm       | Miss | Score | Expect | Rank     | Peptide                        |                 |
|-------------------------------------|---------------------|-----------|-----------|-----------|------|-------|--------|----------|--------------------------------|-----------------|
| <a href="#">222</a>                 | 577.2903            | 1152.5660 | 1152.5234 | 37.0      | 0    | 2     | 44     | 4        | R.EYGGQVTMPR.G + Oxidation (M) |                 |
| <input checked="" type="checkbox"/> | <a href="#">336</a> | 692.3635  | 1382.7124 | 1382.6830 | 21.3 | 0     | 63     | 3.1e-005 | 1                              | R.SLNNQFASFDK.V |
| <input checked="" type="checkbox"/> | <a href="#">337</a> | 692.3693  | 1382.7240 | 1382.6830 | 29.7 | 0     | (58)   | 0.00011  | 1                              | R.SLNNQFASFDK.V |

23. [IPI00322209](#) Mass: 54531 Score: 90 Queries matched: 2 emPAI: 0.06  
Tax\_Id=10090 Gene\_Symbol=Krt8 Keratin, type II cytoskeletal 8

Check to include this hit in error tolerant search or archive report

| Query               | Observed | Mr(expt)  | Mr(calc)  | ppm   | Miss | Score | Expect   | Rank | Peptide          |
|---------------------|----------|-----------|-----------|-------|------|-------|----------|------|------------------|
| <a href="#">336</a> | 692.3635 | 1382.7124 | 1382.7194 | -5.02 | 1    | 63    | 3.1e-005 | 1    | K.SLNNKQFASFDK.V |
| <a href="#">337</a> | 692.3693 | 1382.7240 | 1382.7194 | 3.37  | 1    | (58)  | 0.00011  | 1    | K.SLNNKQFASFDK.V |

24. [IPI00119063](#) Mass: 523342 Score: 88 Queries matched: 4 emPAI: 0.01  
Tax\_Id=10090 Gene\_Symbol=Lrp1 Prolow-density lipoprotein receptor-related protein 1

Check to include this hit in error tolerant search or archive report

| Query                               | Observed            | Mr(expt)  | Mr(calc)  | ppm       | Miss  | Score | Expect | Rank     | Peptide          |                   |
|-------------------------------------|---------------------|-----------|-----------|-----------|-------|-------|--------|----------|------------------|-------------------|
| <input checked="" type="checkbox"/> | <a href="#">91</a>  | 479.2393  | 956.4640  | 956.4676  | -3.67 | 0     | 8      | 9.8      | 1                | R.AGTSPGTPNR.I    |
| <a href="#">128</a>                 | 530.2996            | 1058.5846 | 1058.5356 | 46.3      | 0     | 2     | 55     | 8        | R.EDVVTNGIGR.V   |                   |
| <a href="#">258</a>                 | 626.3500            | 1250.6854 | 1250.7347 | -39.36    | 0     | 0     | 51     | 2        | R.GVAGAPPTVTLR.S |                   |
| <input checked="" type="checkbox"/> | <a href="#">306</a> | 665.3570  | 1328.6994 | 1328.6976 | 1.38  | 0     | 88     | 1.2e-007 | 1                | K.GPVGLAIDFPESK.L |

25. [IPI00121038](#) Mass: 368613 Score: 78 Queries matched: 1 emPAI: 0.01  
Tax\_Id=10090 Gene\_Symbol=Vcan Isoform V0 of Versican core protein

Check to include this hit in error tolerant search or archive report

| Query                               | Observed            | Mr(expt) | Mr(calc)  | ppm       | Miss  | Score | Expect | Rank     | Peptide |                         |
|-------------------------------------|---------------------|----------|-----------|-----------|-------|-------|--------|----------|---------|-------------------------|
| <input checked="" type="checkbox"/> | <a href="#">474</a> | 656.6594 | 1966.9564 | 1966.9670 | -5.42 | 0     | 78     | 9.3e-007 | 1       | R.VSVPTHPDDVGDASLTMVK.L |

## Proteins matching the same set of peptides:

[IPI00230441](#) Mass: 264594 Score: 78 Queries matched: 1  
 Tax\_Id=10090 Gene\_Symbol=Vcan Isoform V1 of Versican core protein  
[IPI00469172](#) Mass: 76209 Score: 78 Queries matched: 1  
 Tax\_Id=10090 Gene\_Symbol=Vcan versican core protein isoform 4  
[IPI00469565](#) Mass: 180325 Score: 78 Queries matched: 1  
 Tax\_Id=10090 Gene\_Symbol=Vcan versican core protein isoform 3  
[IPI00473932](#) Mass: 41850 Score: 78 Queries matched: 1  
 Tax\_Id=10090 Gene\_Symbol=Vcan versican core protein isoform 5  
[IPI00656277](#) Mass: 41758 Score: 78 Queries matched: 1  
 Tax\_Id=10090 Gene\_Symbol=Vcan Versican  
[IPI00875672](#) Mass: 368720 Score: 78 Queries matched: 1  
 Tax\_Id=10090 Gene\_Symbol=Vcan versican core protein isoform 1

26. [IPI00122048](#) Mass: 113045 Score: 76 Queries matched: 2 emPAI: 0.03  
 Tax\_Id=10090 Gene\_Symbol=Atpla3 Sodium/potassium-transporting ATPase subunit alpha-3  
 Check to include this hit in error tolerant search or archive report

| Query                                                   | Observed | Mr(expt)  | Mr(calc)  | ppm   | Miss | Score | Expect   | Rank | Peptide         |
|---------------------------------------------------------|----------|-----------|-----------|-------|------|-------|----------|------|-----------------|
| <input checked="" type="checkbox"/> <a href="#">253</a> | 618.8558 | 1235.6970 | 1235.6986 | -1.26 | 0    | (43)  | 0.0019   | 1    | R.LNIPVSVQVNP.R |
| <input checked="" type="checkbox"/> <a href="#">254</a> | 618.8574 | 1235.7002 | 1235.6986 | 1.33  | 0    | 64    | 1.7e-005 | 1    | R.LNIPVSVQVNP.R |

Proteins matching the same set of peptides:

[IPI00420569](#) Mass: 113457 Score: 76 Queries matched: 2  
 Tax\_Id=10090 Gene\_Symbol=Atpla2 Sodium/potassium-transporting ATPase subunit alpha-2  
[IPI00752412](#) Mass: 117548 Score: 76 Queries matched: 2  
 Tax\_Id=10090 Gene\_Symbol=Atpla3 ATPase, Na+/K+ transporting, alpha 3 polypeptide, isoform CRA\_c  
[IPI00762871](#) Mass: 104717 Score: 76 Queries matched: 2  
 Tax\_Id=10090 Gene\_Symbol=Atpla2 Uncharacterized protein

27. [IPI00120793](#) Mass: 28131 Score: 70 Queries matched: 6 emPAI: 0.25  
 Tax\_Id=10090 Gene\_Symbol=Prnp Major prion protein  
 Check to include this hit in error tolerant search or archive report

| Query                                                   | Observed | Mr(expt)  | Mr(calc)  | ppm  | Miss | Score | Expect  | Rank | Peptide        |
|---------------------------------------------------------|----------|-----------|-----------|------|------|-------|---------|------|----------------|
| <input checked="" type="checkbox"/> <a href="#">150</a> | 544.7386 | 1087.4626 | 1087.4570 | 5.17 | 0    | 40    | 0.0024  | 1    | K.ESQAYYDGR.R  |
| <input checked="" type="checkbox"/> <a href="#">186</a> | 570.2647 | 1138.5148 | 1138.5142 | 0.54 | 0    | 56    | 0.00012 | 1    | K.GENFTETDVK.M |
| <input checked="" type="checkbox"/> <a href="#">187</a> | 570.2665 | 1138.5184 | 1138.5142 | 3.70 | 0    | (32)  | 0.032   | 1    | K.GENFTETDVK.M |
| <input checked="" type="checkbox"/> <a href="#">255</a> | 622.7899 | 1243.5652 | 1243.5581 | 5.72 | 1    | (13)  | 2.6     | 1    | K.ESQAYYDGR.R  |
| <input checked="" type="checkbox"/> <a href="#">256</a> | 622.7908 | 1243.5670 | 1243.5581 | 7.17 | 1    | 24    | 0.2     | 1    | K.ESQAYYDGR.R  |
| <input checked="" type="checkbox"/> <a href="#">257</a> | 622.7933 | 1243.5720 | 1243.5581 | 11.2 | 1    | (7)   | 12      | 1    | K.ESQAYYDGR.R  |

28. [IPI00136402](#) Mass: 111559 Score: 55 Queries matched: 1 emPAI: 0.03  
 Tax\_Id=10090 Gene\_Symbol=Dlga1 Isoform 1 of Disks large-associated protein 1  
 Check to include this hit in error tolerant search or archive report

| Query                                                   | Observed | Mr(expt)  | Mr(calc)  | ppm   | Miss | Score | Expect  | Rank | Peptide             |
|---------------------------------------------------------|----------|-----------|-----------|-------|------|-------|---------|------|---------------------|
| <input checked="" type="checkbox"/> <a href="#">370</a> | 757.4081 | 1512.8016 | 1512.8035 | -1.24 | 0    | 55    | 0.00018 | 1    | R.SLDSLDPAGLLTSPK.F |

Proteins matching the same set of peptides:

[IPI00473783](#) Mass: 106407 Score: 55 Queries matched: 1  
 Tax\_Id=10090 Gene\_Symbol=Dlga1 Uncharacterized protein  
[IPI00648461](#) Mass: 60639 Score: 55 Queries matched: 1  
 Tax\_Id=10090 Gene\_Symbol=Dlga1 Isoform 5 of Disks large-associated protein 1  
[IPI00649710](#) Mass: 110576 Score: 55 Queries matched: 1  
 Tax\_Id=10090 Gene\_Symbol=Dlga1 Isoform 2 of Disks large-associated protein 1  
[IPI00650032](#) Mass: 108461 Score: 55 Queries matched: 1  
 Tax\_Id=10090 Gene\_Symbol=Dlga1 Isoform 3 of Disks large-associated protein 1  
[IPI00653701](#) Mass: 71554 Score: 55 Queries matched: 1  
 Tax\_Id=10090 Gene\_Symbol=Dlga1 disks large-associated protein 1 isoform 4  
[IPI00918030](#) Mass: 76735 Score: 55 Queries matched: 1  
 Tax\_Id=10090 Gene\_Symbol=Dlga1 disks large-associated protein 1 isoform 3  
[IPI00918186](#) Mass: 74905 Score: 55 Queries matched: 1  
 Tax\_Id=10090 Gene\_Symbol=Dlga1 Uncharacterized protein  
[IPI00918416](#) Mass: 77718 Score: 55 Queries matched: 1  
 Tax\_Id=10090 Gene\_Symbol=Dlga1 Uncharacterized protein

29. [IPI00222548](#) Mass: 17633 Score: 55 Queries matched: 1 emPAI: 0.19  
 Tax\_Id=10090 Gene\_Symbol=Rpl29;Gm13841;Gm8210 60S ribosomal protein L29  
 Check to include this hit in error tolerant search or archive report

| Query                                                   | Observed | Mr(expt)  | Mr(calc)  | ppm  | Miss | Score | Expect  | Rank | Peptide        |
|---------------------------------------------------------|----------|-----------|-----------|------|------|-------|---------|------|----------------|
| <input checked="" type="checkbox"/> <a href="#">112</a> | 520.2804 | 1038.5462 | 1038.5458 | 0.45 | 0    | 55    | 0.00021 | 1    | K.AQASAPQAPK.G |

Proteins matching the same set of peptides:

[IPI00461500](#) Mass: 17603 Score: 55 Queries matched: 1  
 Tax\_Id=10090 Gene\_Symbol=Rpl29-ps2 Uncharacterized protein  
[IPI00626884](#) Mass: 17663 Score: 55 Queries matched: 1  
 Tax\_Id=10090 Gene\_Symbol=Gm6344 Uncharacterized protein  
[IPI00762791](#) Mass: 17693 Score: 55 Queries matched: 1  
 Tax\_Id=10090 Gene\_Symbol=Gm10709 Uncharacterized protein  
[IPI00849210](#) Mass: 17678 Score: 55 Queries matched: 1  
 Tax\_Id=10090 Gene\_Symbol=Gm5561 similar to ribosomal protein  
[IPI00849550](#) Mass: 28730 Score: 55 Queries matched: 1

Tax\_Id=10090 Gene\_Symbol=Gm12508 similar to ribosomal protein  
[IPI00850168](#) Mass: 22613 Score: 55 Queries matched: 1  
 Tax\_Id=10090 Gene\_Symbol=Gm5218 similar to ribosomal protein  
[IPI00874437](#) Mass: 17127 Score: 55 Queries matched: 1  
 Tax\_Id=10090 Gene\_Symbol=- Uncharacterized protein

30. [IPI00124499](#) Mass: 57802 Score: 50 Queries matched: 2 emPAI: 0.06  
 Tax\_Id=10090 Gene\_Symbol=Krt79 Keratin, type II cytoskeletal 79

Check to include this hit in error tolerant search or archive report

| Query                                                   | Observed | Mr(expt)  | Mr(calc)  | ppm    | Miss Score | Expect | Rank    | Peptide |                 |
|---------------------------------------------------------|----------|-----------|-----------|--------|------------|--------|---------|---------|-----------------|
| <a href="#">141</a>                                     | 532.2756 | 1062.5366 | 1062.5709 | -32.26 | 0          | 6      | 21      | 1       | K.AQYELIAQK.S   |
| <input checked="" type="checkbox"/> <a href="#">307</a> | 665.3589 | 1328.7032 | 1328.7187 | -11.64 | 0          | 50     | 0.00068 | 1       | R.NLDELIIAEVK.A |

31. [IPI00113410](#) Mass: 38586 Score: 50 Queries matched: 1 emPAI: 0.09  
 Tax\_Id=10090 Gene\_Symbol=Hapln2 Hyaluronan and proteoglycan link protein 2

Check to include this hit in error tolerant search or archive report

| Query                                                   | Observed | Mr(expt)  | Mr(calc)  | ppm  | Miss Score | Expect | Rank    | Peptide |                  |
|---------------------------------------------------------|----------|-----------|-----------|------|------------|--------|---------|---------|------------------|
| <input checked="" type="checkbox"/> <a href="#">342</a> | 696.3721 | 1390.7296 | 1390.7245 | 3.70 | 0          | 50     | 0.00072 | 1       | R.LEGVVFPYQPSR.G |

32. [IPI00223714](#) Mass: 21964 Score: 47 Queries matched: 1 emPAI: 0.15  
 Tax\_Id=10090 Gene\_Symbol=Hist1hle Histone H1.4

Check to include this hit in error tolerant search or archive report

| Query                                                   | Observed | Mr(expt)  | Mr(calc)  | ppm   | Miss Score | Expect | Rank   | Peptide |                  |
|---------------------------------------------------------|----------|-----------|-----------|-------|------------|--------|--------|---------|------------------|
| <input checked="" type="checkbox"/> <a href="#">250</a> | 614.8409 | 1227.6672 | 1227.6711 | -3.11 | 0          | 47     | 0.0013 | 1       | K.TSGPPVSELITK.A |

33. [IPI00136703](#) Mass: 42971 Score: 46 Queries matched: 2 emPAI: 0.08  
 Tax\_Id=10090 Gene\_Symbol=Ckb Creatine kinase B-type

Check to include this hit in error tolerant search or archive report

| Query                                                   | Observed | Mr(expt)  | Mr(calc)  | ppm   | Miss Score | Expect | Rank   | Peptide |                 |
|---------------------------------------------------------|----------|-----------|-----------|-------|------------|--------|--------|---------|-----------------|
| <input checked="" type="checkbox"/> <a href="#">299</a> | 652.3648 | 1302.7150 | 1302.7183 | -2.51 | 0          | (36)   | 0.016  | 1       | K.VLTPELYAELR.A |
| <input checked="" type="checkbox"/> <a href="#">300</a> | 652.3654 | 1302.7162 | 1302.7183 | -1.59 | 0          | 46     | 0.0016 | 1       | K.VLTPELYAELR.A |

34. [IPI00229598](#) Mass: 45025 Score: 40 Queries matched: 1 emPAI: 0.07  
 Tax\_Id=10090 Gene\_Symbol=Cnp Isoform CNPI of 2',3'-cyclic-nucleotide 3'-phosphodiesterase

Check to include this hit in error tolerant search or archive report

| Query                                                   | Observed | Mr(expt)  | Mr(calc)  | ppm   | Miss Score | Expect | Rank   | Peptide |                   |
|---------------------------------------------------------|----------|-----------|-----------|-------|------------|--------|--------|---------|-------------------|
| <input checked="" type="checkbox"/> <a href="#">260</a> | 628.8149 | 1255.6152 | 1255.6157 | -0.34 | 0          | 40     | 0.0062 | 1       | K.GGSQGEAVGELPR.G |

Proteins matching the same set of peptides:

[IPI00319602](#) Mass: 47493 Score: 40 Queries matched: 1  
 Tax\_Id=10090 Gene\_Symbol=Cnp Isoform CNPII of 2',3'-cyclic-nucleotide 3'-phosphodiesterase

35. [IPI00123176](#) Mass: 36804 Score: 39 Queries matched: 2 emPAI: 0.09  
 Tax\_Id=10090 Gene\_Symbol=Gm6316 Glyceraldehyde-3-phosphate dehydrogenase

Check to include this hit in error tolerant search or archive report

| Query                                                   | Observed | Mr(expt)  | Mr(calc)  | ppm  | Miss Score | Expect | Rank   | Peptide |                     |
|---------------------------------------------------------|----------|-----------|-----------|------|------------|--------|--------|---------|---------------------|
| <input checked="" type="checkbox"/> <a href="#">332</a> | 685.3768 | 1368.7390 | 1368.7361 | 2.15 | 0          | 39     | 0.0067 | 1       | R.GAAQNIIPASTGAAK.A |
| <input checked="" type="checkbox"/> <a href="#">333</a> | 685.3788 | 1368.7430 | 1368.7361 | 5.08 | 0          | (33)   | 0.031  | 1       | R.GAAQNIIPASTGAAK.A |

Proteins matching the same set of peptides:

[IPI00135284](#) Mass: 36092 Score: 39 Queries matched: 2  
 Tax\_Id=10090 Gene\_Symbol=Gm16374 Glyceraldehyde-3-phosphate dehydrogenase  
[IPI00229201](#) Mass: 16676 Score: 39 Queries matched: 2  
 Tax\_Id=10090 Gene\_Symbol=3000002C10Rik Putative uncharacterized protein  
[IPI00271869](#) Mass: 36293 Score: 39 Queries matched: 2  
 Tax\_Id=10090 Gene\_Symbol=- 36 kDa protein  
[IPI00273646](#) Mass: 36072 Score: 39 Queries matched: 2  
 Tax\_Id=10090 Gene\_Symbol=Gapdh;LOC100042025 Glyceraldehyde-3-phosphate dehydrogenase  
[IPI00622795](#) Mass: 36074 Score: 39 Queries matched: 2  
 Tax\_Id=10090 Gene\_Symbol=- 36 kDa protein  
[IPI00625893](#) Mass: 36205 Score: 39 Queries matched: 2  
 Tax\_Id=10090 Gene\_Symbol=Gm6981 Glyceraldehyde-3-phosphate dehydrogenase  
[IPI00752289](#) Mass: 36308 Score: 39 Queries matched: 2  
 Tax\_Id=10090 Gene\_Symbol=Gm10290 Glyceraldehyde-3-phosphate dehydrogenase  
[IPI00848801](#) Mass: 36100 Score: 39 Queries matched: 2  
 Tax\_Id=10090 Gene\_Symbol=- 36 kDa protein  
[IPI00849045](#) Mass: 36072 Score: 39 Queries matched: 2  
 Tax\_Id=10090 Gene\_Symbol=- 36 kDa protein  
[IPI00850337](#) Mass: 44633 Score: 39 Queries matched: 2  
 Tax\_Id=10090 Gene\_Symbol=LOC100048117 similar to Glyceraldehyde-3-phosphate dehydrogenase (GAPDH) isoform 1  
[IPI00850377](#) Mass: 35975 Score: 39 Queries matched: 2  
 Tax\_Id=10090 Gene\_Symbol=- 36 kDa protein  
[IPI00850779](#) Mass: 36076 Score: 39 Queries matched: 2  
 Tax\_Id=10090 Gene\_Symbol=- 36 kDa protein  
[IPI00874682](#) Mass: 36038 Score: 39 Queries matched: 2  
 Tax\_Id=10090 Gene\_Symbol=- 36 kDa protein

IPI00874964 Mass: 36512 Score: 39 Queries matched: 2  
 Tax\_Id=10090 Gene\_Symbol=- 36 kDa protein

Peptide matches not assigned to protein hits: (no details means no match)

| Query | Observed | Mr(expt)  | Mr(calc)  | ppm    | Miss | Score | Expect | Rank | Peptide                    |
|-------|----------|-----------|-----------|--------|------|-------|--------|------|----------------------------|
| 235   | 582.7992 | 1163.5838 | 1163.5757 | 6.99   | 0    | 34    | 0.036  | 1    | QMIGEFLGNR                 |
| 157   | 551.8046 | 1101.5946 | 1101.5778 | 15.3   | 1    | 28    | 0.13   | 1    | EEEGRITIR                  |
| 48    | 428.7658 | 855.5170  | 855.4814  | 41.7   | 0    | 26    | 0.14   | 1    | LGAETLPR                   |
| 30    | 408.2383 | 814.4620  | 814.4661  | -4.97  | 1    | 24    | 0.43   | 1    | GTVAPSKR                   |
| 34    | 408.2388 | 814.4630  | 814.4661  | -3.74  | 1    | 24    | 0.45   | 1    | GTVAPSKR                   |
| 461   | 912.9987 | 1823.9828 | 1823.9782 | 2.57   | 0    | 23    | 0.19   | 1    | VGINYQPPTVVPGDLAK          |
| 53    | 435.7717 | 869.5288  | 869.5446  | -18.17 | 1    | 20    | 0.39   | 1    | ERLLAIR                    |
| 344   | 699.8972 | 1397.7798 | 1397.8493 | -49.71 | 1    | 20    | 0.5    | 1    | LNKLEDIVLIK                |
| 274   | 634.3542 | 1266.6938 | 1266.7084 | -11.52 | 1    | 19    | 0.6    | 1    | YLYGIRVEVR                 |
| 47    | 428.7636 | 855.5126  | 855.5542  | -48.53 | 0    | 19    | 0.62   | 1    | TLAVLALR                   |
| 276   | 634.3552 | 1266.6958 | 1266.7084 | -9.94  | 1    | 19    | 0.68   | 1    | YLYGIRVEVR                 |
| 437   | 851.4508 | 1700.8870 | 1700.8985 | -6.74  | 0    | 18    | 0.89   | 1    | AVFVDLEPTVIDEVR            |
| 38    | 408.2404 | 814.4662  | 814.4661  | 0.19   | 1    | 17    | 1.9    | 1    | GTVAPSKR                   |
| 275   | 634.3550 | 1266.6954 | 1266.7084 | -10.25 | 1    | 17    | 0.95   | 1    | YLYGIRVEVR                 |
| 172   | 557.7983 | 1113.5820 | 1113.5891 | -6.30  | 1    | 17    | 1.6    | 1    | SSPLRGPQTSR                |
| 32    | 408.2387 | 814.4628  | 814.4661  | -3.99  | 1    | 17    | 2.1    | 1    | GTVAPSKR                   |
| 246   | 595.8132 | 1189.6118 | 1189.6489 | -31.12 | 1    | 17    | 2      | 1    | KTNIIDSMRLR                |
| 345   | 699.8976 | 1397.7806 | 1397.8493 | -49.14 | 1    | 16    | 1.2    | 1    | LNKLEDIVLIK                |
| 35    | 408.2389 | 814.4632  | 814.4661  | -3.50  | 1    | 16    | 2.6    | 1    | GTVAPSKR                   |
| 170   | 557.7947 | 1113.5748 | 1113.5891 | -12.77 | 1    | 16    | 2.1    | 1    | SSPLRGPQTSR                |
| 171   | 557.7957 | 1113.5768 | 1113.5891 | -10.97 | 1    | 16    | 2.2    | 1    | SSPLRGPQTSR                |
| 228   | 578.8077 | 1155.6008 | 1155.5897 | 9.62   | 1    | 16    | 1.9    | 1    | SSWTGHGLRR                 |
| 41    | 413.6995 | 825.3844  | 825.4093  | -30.13 | 0    | 15    | 1.3    | 1    | HQDVATR                    |
| 140   | 531.2813 | 1060.5480 | 1060.5665 | -17.41 | 0    | 15    | 2.6    | 1    | YLLASNAPGR                 |
| 36    | 408.2390 | 814.4634  | 814.4661  | -3.23  | 1    | 15    | 3.1    | 1    | KISPNTR                    |
| 31    | 408.2386 | 814.4626  | 814.4661  | -4.23  | 1    | 15    | 3.3    | 1    | GTVAPSKR                   |
| 29    | 408.2381 | 814.4616  | 814.4661  | -5.44  | 1    | 15    | 3      | 1    | KISPNTR                    |
| 12    | 602.3666 | 601.3593  | 601.3435  | 26.3   | 0    | 15    | 5.6    | 1    | SSPALK                     |
| 19    | 343.7292 | 685.4438  | 685.4235  | 29.7   | 1    | 15    | 1.8    | 1    | KGAAALR                    |
| 37    | 408.2393 | 814.4640  | 814.4661  | -2.49  | 1    | 15    | 3.3    | 1    | KISPNTR                    |
| 45    | 423.2270 | 844.4394  | 844.4515  | -14.24 | 1    | 15    | 3.9    | 1    | AIRENSR                    |
| 180   | 565.3195 | 1128.6244 | 1128.6754 | -45.16 | 0    | 14    | 2.7    | 1    | QLITDLVISK                 |
| 225   | 577.2920 | 1152.5694 | 1152.6251 | -48.29 | 1    | 14    | 2.6    | 1    | EGVHAGTINKK                |
| 227   | 577.7924 | 1153.5702 | 1153.5840 | -11.89 | 1    | 14    | 2.7    | 1    | KLHDSNDGLR                 |
| 40    | 412.7514 | 823.4882  | 823.4817  | 7.98   | 0    | 14    | 1.1    | 1    | RPWLPR                     |
| 138   | 531.2780 | 1060.5414 | 1060.5665 | -23.63 | 0    | 14    | 3.6    | 1    | YLLASNAPGR                 |
| 39    | 412.7500 | 823.4854  | 823.5028  | -21.08 | 1    | 14    | 1      | 1    | VPSRLPR                    |
| 223   | 577.2915 | 1152.5684 | 1152.6251 | -49.16 | 1    | 14    | 3      | 1    | EGVHAGTINKK                |
| 33    | 408.2388 | 814.4630  | 814.4661  | -3.74  | 1    | 14    | 4.6    | 1    | GTVAPSKR                   |
| 148   | 539.2706 | 1076.5266 | 1076.5098 | 15.6   | 0    | 13    | 3.7    | 1    | SSLDGESSGIR                |
| 143   | 533.2622 | 1064.5098 | 1064.5138 | -3.72  | 0    | 13    | 3.3    | 1    | AQYEDIAQK                  |
| 61    | 450.7198 | 899.4250  | 899.4461  | -23.38 | 1    | 13    | 2.3    | 1    | REPEDVR                    |
| 111   | 519.2660 | 1036.5174 | 1036.5011 | 15.7   | 0    | 13    | 4.2    | 1    | VLPYMNRR + Oxidation (M)   |
| 28    | 408.2372 | 814.4598  | 814.4661  | -7.67  | 1    | 12    | 5.7    | 1    | GTVAPSKR                   |
| 195   | 572.8080 | 1143.6014 | 1143.6546 | -46.49 | 1    | 12    | 5.2    | 1    | QAMLRQLLR + Oxidation (M)  |
| 104   | 508.2908 | 1014.5670 | 1014.5709 | -3.83  | 0    | 12    | 5.1    | 1    | DVNAAIATIK                 |
| 229   | 578.8155 | 1155.6164 | 1155.6611 | -38.68 | 1    | 12    | 4.4    | 1    | DAVSSSLPLAKR               |
| 94    | 487.3005 | 972.5864  | 972.5869  | -0.46  | 0    | 12    | 2.7    | 1    | VPGHLPVVR                  |
| 52    | 435.7706 | 869.5266  | 869.4858  | 46.9   | 0    | 12    | 2.8    | 1    | VSGVEVPLA                  |
| 285   | 645.8337 | 1289.6528 | 1289.6054 | 36.8   | 1    | 11    | 5.8    | 1    | GGDYWRFHPR                 |
| 159   | 556.8300 | 1111.6454 | 1111.6713 | -23.25 | 1    | 11    | 2.6    | 1    | LRALLELR                   |
| 139   | 531.2795 | 1060.5444 | 1060.5665 | -20.80 | 0    | 11    | 6.9    | 1    | YLLASNAPGR                 |
| 95    | 491.7284 | 981.4422  | 981.4879  | -46.56 | 0    | 11    | 3.3    | 1    | EPAPQQQAGK                 |
| 239   | 595.3087 | 1188.6028 | 1188.6285 | -21.58 | 1    | 11    | 7.2    | 1    | SPTIRDMVVR + Oxidation (M) |
| 248   | 606.8034 | 1211.5922 | 1211.6371 | -37.01 | 1    | 10    | 5.8    | 1    | GSRGDGLQGPR                |
| 114   | 520.7663 | 1039.5180 | 1039.5062 | 11.4   | 1    | 10    | 5.8    | 1    | KFPFCWR                    |
| 173   | 558.2787 | 1114.5428 | 1114.5731 | -27.11 | 1    | 10    | 7      | 1    | KSASSHIETR                 |
| 179   | 565.3195 | 1128.6244 | 1128.6502 | -22.85 | 1    | 10    | 7.4    | 1    | KLELEATVAR                 |
| 73    | 464.7799 | 927.5452  | 927.5501  | -5.27  | 1    | 10    | 6.1    | 1    | LNLTSPPKR                  |
| 82    | 464.7838 | 927.5530  | 927.5138  | 42.3   | 1    | 10    | 5.6    | 1    | DVPVQSKR                   |
| 358   | 728.8514 | 1455.6882 | 1455.7027 | -9.96  | 0    | 10    | 6      | 1    | DAMELKPNGGAEPK             |
| 57    | 444.2293 | 886.4440  | 886.4695  | -28.67 | 1    | 10    | 10     | 1    | KVMGPSRR + Oxidation (M)   |
| 108   | 517.2664 | 1032.5182 | 1032.4724 | 44.5   | 0    | 10    | 9.5    | 1    | VLDEEGSER                  |
| 27    | 399.7258 | 797.4370  | 797.4759  | -48.75 | 1    | 9     | 6      | 1    | IPVKGER                    |
| 152   | 545.2901 | 1088.5656 | 1088.5397 | 23.9   | 0    | 9     | 11     | 1    | MGSADRPALR + Oxidation (M) |
| 280   | 643.3559 | 1284.6972 | 1284.7190 | -16.91 | 1    | 9     | 7.9    | 1    | NQKWLILNK                  |
| 153   | 545.2922 | 1088.5698 | 1088.5978 | -25.71 | 1    | 9     | 11     | 1    | KDFTVNLPR                  |
| 240   | 595.3089 | 1188.6032 | 1188.5887 | 12.2   | 0    | 9     | 10     | 1    | FVPPQTSSGRR                |
| 142   | 532.2774 | 1062.5402 | 1062.5128 | 25.9   | 1    | 9     | 11     | 1    | KMEEQQVR + Oxidation (M)   |
| 81    | 464.7831 | 927.5516  | 927.5250  | 28.7   | 1    | 9     | 6.7    | 1    | QSPLATRR                   |
| 273   | 631.8077 | 1261.6008 | 1261.5826 | 14.4   | 0    | 9     | 9      | 1    | EALEVDWSGEK                |
| 446   | 885.9580 | 1769.9014 | 1769.9271 | -14.51 | 1    | 9     | 8.1    | 1    | ELEAERQIVASQLER            |
| 243   | 595.3099 | 1188.6052 | 1188.6285 | -19.56 | 1    | 9     | 11     | 1    | SPTIRDMVVR + Oxidation (M) |
| 76    | 464.7814 | 927.5482  | 927.5501  | -2.02  | 1    | 9     | 7.7    | 1    | LKAESKPR                   |
| 105   | 514.8010 | 1027.5874 | 1027.5597 | 27.0   | 1    | 9     | 8.2    | 1    | MLSKAVSHR                  |
| 85    | 470.7675 | 939.5204  | 939.5515  | -33.03 | 1    | 9     | 7.2    | 1    | LRPGWRR                    |

|     |           |           |           |        |   |   |     |   |                                   |
|-----|-----------|-----------|-----------|--------|---|---|-----|---|-----------------------------------|
| 137 | 530.7860  | 1059.5574 | 1059.5924 | -32.98 | 0 | 9 | 15  | 1 | TASLAEELISR                       |
| 241 | 595.3092  | 1188.6038 | 1188.5887 | 12.7   | 0 | 9 | 11  | 1 | FVPPQTSSGNR                       |
| 279 | 643.3487  | 1284.6828 | 1284.6357 | 36.7   | 1 | 8 | 9.9 | 1 | GRAGVCDPALNR                      |
| 113 | 520.7655  | 1039.5164 | 1039.5121 | 4.23   | 0 | 8 | 8.9 | 1 | SGMLS YGLGR                       |
| 79  | 464.7817  | 927.5488  | 927.5501  | -1.38  | 1 | 8 | 8.5 | 1 | LKAESKPR                          |
| 169 | 557.7910  | 1113.5674 | 1113.6005 | -29.66 | 1 | 8 | 11  | 1 | MTAFFFKTLR                        |
| 465 | 948.9885  | 1895.9624 | 1895.9516 | 5.71   | 0 | 8 | 9.3 | 1 | TITTFEQEAELEELAK                  |
| 182 | 565.3201  | 1128.6256 | 1128.6754 | -44.09 | 0 | 8 | 11  | 1 | QLITDLVISK                        |
| 226 | 577.2932  | 1152.5718 | 1152.6251 | -46.19 | 1 | 8 | 12  | 1 | EGKLEHTLAR                        |
| 58  | 449.7471  | 897.4796  | 897.4556  | 26.8   | 0 | 8 | 11  | 1 | DAETPLPR                          |
| 181 | 565.3198  | 1128.6250 | 1128.6503 | -22.33 | 0 | 8 | 12  | 1 | TKPVLSSLER                        |
| 43  | 415.2015  | 828.3884  | 828.4276  | -47.26 | 0 | 8 | 6.5 | 1 | IHGSMRLR + Oxidation (M)          |
| 97  | 496.2269  | 990.4392  | 990.4883  | -49.50 | 0 | 8 | 8.1 | 1 | AFSSHSSLR                         |
| 445 | 885.9568  | 1769.8990 | 1769.8995 | -0.27  | 1 | 8 | 11  | 1 | LQFRD VNGEMVAVHR                  |
| 80  | 464.7817  | 927.5488  | 927.5138  | 37.8   | 1 | 8 | 10  | 1 | DVPVQSKR                          |
| 77  | 464.7814  | 927.5482  | 927.5138  | 37.2   | 1 | 8 | 10  | 1 | DVPVQSKR                          |
| 330 | 672.8422  | 1343.6698 | 1343.6681 | 1.32   | 1 | 7 | 12  | 1 | AQGDEQEAQLKK                      |
| 222 | 577.2903  | 1152.5660 | 1152.5420 | 20.9   | 0 | 7 | 13  | 1 | AGGLAAMPYMR + Oxidation (M)       |
| 100 | 506.2394  | 1010.4642 | 1010.4781 | -13.71 | 1 | 7 | 10  | 1 | DYDRSLSR                          |
| 74  | 464.7807  | 927.5468  | 927.5138  | 35.7   | 1 | 7 | 12  | 1 | DVPVQSKR                          |
| 338 | 692.3942  | 1382.7738 | 1382.7630 | 7.86   | 1 | 7 | 10  | 1 | QSASPLRLQLDR                      |
| 99  | 500.2558  | 998.4970  | 998.4491  | 48.0   | 0 | 7 | 14  | 1 | TMSNFLDR + Oxidation (M)          |
| 283 | 645.8325  | 1289.6504 | 1289.6054 | 34.9   | 1 | 7 | 17  | 1 | GGDYWRFHPR                        |
| 42  | 415.2015  | 828.3884  | 828.4276  | -47.26 | 0 | 7 | 8.7 | 1 | IHGSMRLR + Oxidation (M)          |
| 64  | 450.7218  | 899.4290  | 899.4324  | -3.68  | 0 | 7 | 11  | 1 | FMFNGLR + Oxidation (M)           |
| 244 | 595.3101  | 1188.6056 | 1188.5887 | 14.2   | 0 | 7 | 18  | 1 | FVPPQTSSGNR                       |
| 103 | 506.2436  | 1010.4726 | 1010.5145 | -41.43 | 0 | 7 | 12  | 1 | EGTQAPGVPR                        |
| 96  | 496.2260  | 990.4374  | 990.4487  | -11.39 | 1 | 7 | 10  | 1 | ASMSRHRM + Oxidation (M)          |
| 438 | 852.4293  | 1702.8440 | 1702.8989 | -32.20 | 0 | 6 | 15  | 1 | VLSTSTDLAAVADALK                  |
| 286 | 645.8344  | 1289.6542 | 1289.6054 | 37.9   | 1 | 6 | 18  | 1 | GGDYWRFHPR                        |
| 59  | 450.2231  | 898.4316  | 898.4695  | -42.09 | 0 | 6 | 11  | 1 | MSVPPNR                           |
| 196 | 572.8097  | 1143.6048 | 1143.6546 | -43.52 | 1 | 6 | 20  | 1 | QAMLRQLLR + Oxidation (M)         |
| 192 | 572.8068  | 1143.5990 | 1143.6546 | -48.59 | 1 | 6 | 20  | 1 | QAMLRQLLR + Oxidation (M)         |
| 161 | 556.8326  | 1111.6506 | 1111.5985 | 46.9   | 1 | 6 | 8.1 | 1 | SKSHPASLASK                       |
| 151 | 545.2896  | 1088.5646 | 1088.5978 | -30.49 | 1 | 6 | 22  | 1 | KDFTVNLPR                         |
| 98  | 499.2703  | 996.5260  | 996.5141  | 12.0   | 1 | 6 | 16  | 1 | EGYFRAVR                          |
| 184 | 565.3227  | 1128.6308 | 1128.6754 | -39.49 | 0 | 6 | 17  | 1 | QLITDLVISK                        |
| 75  | 464.7812  | 927.5478  | 927.5138  | 36.7   | 1 | 6 | 14  | 1 | DVPVQSKR                          |
| 343 | 699.8953  | 1397.7760 | 1397.7990 | -16.45 | 1 | 6 | 12  | 1 | TGNDVLKALALGAR                    |
| 78  | 464.7816  | 927.5486  | 927.5501  | -1.59  | 1 | 6 | 14  | 1 | LKAESKPR                          |
| 242 | 595.3098  | 1188.6050 | 1188.6285 | -19.71 | 1 | 6 | 22  | 1 | AALKDVVACSR                       |
| 124 | 529.2703  | 1056.5260 | 1056.5087 | 16.4   | 0 | 6 | 18  | 1 | KPETGEDPGK                        |
| 359 | 730.9042  | 1459.7938 | 1459.7453 | 33.3   | 1 | 6 | 15  | 1 | VDILENRVMDTR                      |
| 278 | 643.3486  | 1284.6826 | 1284.6357 | 36.5   | 1 | 6 | 19  | 1 | GRAGVCDPALNR                      |
| 232 | 581.3160  | 1160.6174 | 1160.6587 | -35.53 | 1 | 6 | 25  | 1 | TELSILRAMK                        |
| 224 | 577.2915  | 1152.5684 | 1152.5420 | 23.0   | 0 | 5 | 21  | 1 | MTLNTMTWR                         |
| 282 | 645.8323  | 1289.6500 | 1289.6054 | 34.6   | 1 | 5 | 25  | 1 | GGDYWRFHPR                        |
| 277 | 636.8104  | 1271.6062 | 1271.6357 | -23.17 | 0 | 5 | 17  | 1 | LLDAESEDRPK                       |
| 88  | 470.7690  | 939.5234  | 939.5515  | -29.84 | 1 | 5 | 16  | 1 | LRPGWRR                           |
| 185 | 565.3278  | 1128.6410 | 1128.6251 | 14.1   | 1 | 5 | 21  | 1 | AGLSDLELRR                        |
| 55  | 441.2665  | 880.5184  | 880.5355  | -19.36 | 1 | 5 | 9   | 1 | SPRLRPR                           |
| 168 | 556.8366  | 1111.6586 | 1111.6462 | 11.2   | 1 | 5 | 9.8 | 1 | SPRISRPTAK                        |
| 249 | 612.3348  | 1222.6550 | 1222.6346 | 16.7   | 0 | 5 | 22  | 1 | LDGNAIFFOAK                       |
| 284 | 645.8327  | 1289.6508 | 1289.6054 | 35.2   | 1 | 5 | 27  | 1 | GGDYWRFHPR                        |
| 462 | 612.9324  | 1835.7754 | 1835.7858 | -5.70  | 1 | 5 | 6.7 | 1 | DESLVSRAMEYMGW + Oxidation (M)    |
| 247 | 597.3036  | 1192.5926 | 1192.5724 | 17.0   | 1 | 5 | 28  | 1 | KEGTEWSQTK                        |
| 183 | 565.3204  | 1128.6262 | 1128.6503 | -21.27 | 0 | 5 | 26  | 1 | TKPVLSSLER                        |
| 56  | 441.2668  | 880.5190  | 880.4879  | 35.4   | 1 | 5 | 9.6 | 1 | GLDRHVK                           |
| 115 | 523.7672  | 1045.5198 | 1045.5152 | 4.45   | 1 | 5 | 35  | 1 | QEESARAK                          |
| 160 | 556.8324  | 1111.6502 | 1111.5985 | 46.5   | 1 | 4 | 12  | 1 | SKSHPASLASK                       |
| 502 | 1073.0221 | 2144.0296 | 2144.0498 | -9.39  | 1 | 4 | 18  | 1 | KLQNSIQESTQNFDDHLK                |
| 84  | 470.7674  | 939.5202  | 939.5614  | -43.77 | 1 | 4 | 20  | 1 | NRLPIATR                          |
| 90  | 475.7499  | 949.4852  | 949.5089  | -24.87 | 1 | 4 | 32  | 1 | LCMSLKAK                          |
| 520 | 747.3844  | 2239.1314 | 2239.2259 | -42.22 | 1 | 4 | 18  | 1 | GAF TGLHSLKVLMLQNNQLR             |
| 54  | 435.7731  | 869.5316  | 869.5123  | 22.2   | 0 | 4 | 15  | 1 | VSLWLR                            |
| 163 | 556.8347  | 1111.6548 | 1111.6462 | 7.80   | 1 | 4 | 12  | 1 | KPQLDTRVR                         |
| 83  | 470.7668  | 939.5190  | 939.5515  | -34.52 | 1 | 4 | 21  | 1 | LRPGWRR                           |
| 236 | 586.7966  | 1171.5786 | 1171.6271 | -41.33 | 0 | 4 | 26  | 1 | MNLPSPVISSK                       |
| 67  | 450.7224  | 899.4302  | 899.4032  | 30.1   | 0 | 4 | 19  | 1 | HSGCAVNR                          |
| 365 | 735.9140  | 1469.8134 | 1469.7435 | 47.6   | 1 | 4 | 18  | 1 | TTLLQEEYAKMK + Oxidation (M)      |
| 522 | 747.3883  | 2239.1431 | 2239.1346 | 3.80   | 1 | 4 | 18  | 1 | VSQSGGTGHANPTFKLQTPQGK            |
| 281 | 645.8319  | 1289.6492 | 1289.6292 | 15.5   | 1 | 4 | 32  | 1 | TKFEFWSYTK                        |
| 109 | 517.2719  | 1032.5292 | 1032.5564 | -26.28 | 0 | 4 | 35  | 1 | VSQGSTVISR                        |
| 467 | 650.9503  | 1949.8291 | 1949.9001 | -36.40 | 0 | 4 | 9.3 | 1 | EGGGTELVTMTSNTPER + Oxidation (M) |
| 238 | 595.3069  | 1188.5992 | 1188.6285 | -24.60 | 1 | 4 | 33  | 1 | SPTIRDMVVR + Oxidation (M)        |
| 164 | 556.8352  | 1111.6558 | 1111.6462 | 8.70   | 1 | 4 | 14  | 1 | KPQLDTRVR                         |
| 44  | 422.2433  | 842.4720  | 842.4610  | 13.1   | 0 | 4 | 37  | 1 | VAVEGNVR                          |
| 178 | 561.2647  | 1120.5148 | 1120.5625 | -42.53 | 1 | 3 | 32  | 1 | GAFSNNERVK                        |
| 251 | 616.8057  | 1231.5968 | 1231.5680 | 23.4   | 1 | 3 | 33  | 1 | EENEAEKVER                        |
| 258 | 626.3500  | 1250.6854 | 1250.6329 | 42.0   | 0 | 3 | 25  | 1 | YLPTCLDTRLR                       |
| 123 | 529.2694  | 1056.5242 | 1056.5352 | -10.40 | 0 | 3 | 30  | 1 | NGFVLHENK                         |

|     |           |           |           |        |   |   |          |   |                                           |
|-----|-----------|-----------|-----------|--------|---|---|----------|---|-------------------------------------------|
| 427 | 552.5915  | 1654.7527 | 1654.7708 | -10.97 | 1 | 3 | 20       | 1 | MRGPCQLDFDTGAR                            |
| 87  | 470.7683  | 939.5220  | 939.5250  | -3.15  | 1 | 3 | 23       | 1 | PRAVPSGTR                                 |
| 158 | 556.7419  | 1111.4692 | 1111.5121 | -38.51 | 1 | 3 | 12       | 1 | WKMEFDTR                                  |
| 503 | 1073.0231 | 2144.0316 | 2144.0233 | 3.89   | 0 | 3 | 25       | 1 | KPDLENVSSEGGGTLNLDK                       |
| 24  | 370.6898  | 739.3650  | 739.3357  | 39.7   | 0 | 3 | 23       | 1 | MTMGLR + 2 Oxidation (M)                  |
| 245 | 595.3107  | 1188.6068 | 1188.5631 | 36.8   | 0 | 3 | 42       | 1 | LDMFQQMIPR + 2 Oxidation (M)              |
| 20  | 349.2049  | 696.3952  | 696.3629  | 46.5   | 0 | 3 | 18       | 1 | MVIYR + Oxidation (M)                     |
| 66  | 450.7223  | 899.4300  | 899.4726  | -47.29 | 1 | 3 | 25       | 1 | HFPSTRR                                   |
| 10  | 577.2819  | 576.2746  | 576.2867  | -21.00 | 0 | 3 | 46       | 1 | SSAQQK                                    |
| 455 | 897.9139  | 1793.8132 | 1793.7699 | 24.2   | 1 | 3 | 26       | 1 | MSYLKTTMEDEESSK + Oxidation (M)           |
| 576 | 916.4275  | 2746.2607 | 2746.2996 | -14.16 | 1 | 3 | 17       | 1 | QAPPQYTFIGELNSMGIWYRMGR + 2 Oxidation (M) |
| 62  | 450.7201  | 899.4256  | 899.4647  | -43.42 | 0 | 3 | 24       | 1 | SLQHMLR + Oxidation (M)                   |
| 13  | 323.1536  | 644.2926  | 644.3242  | -48.93 | 0 | 3 | 16       | 1 | GAASPSR                                   |
| 86  | 470.7677  | 939.5208  | 939.5548  | -36.18 | 1 | 3 | 28       | 1 | MRKFRPR                                   |
| 89  | 470.7696  | 939.5246  | 939.5515  | -28.56 | 1 | 3 | 25       | 1 | LRPGWRR                                   |
| 166 | 556.8363  | 1111.6580 | 1111.6423 | 14.1   | 1 | 3 | 18       | 1 | MKPKASLPPK + Oxidation (M)                |
| 17  | 325.1857  | 648.3568  | 648.3377  | 29.5   | 1 | 3 | 42       | 1 | MAAGKR + Oxidation (M)                    |
| 63  | 450.7214  | 899.4282  | 899.4647  | -40.53 | 0 | 2 | 28       | 1 | SLQHMLR + Oxidation (M)                   |
| 357 | 728.3519  | 1454.6892 | 1454.7617 | -49.78 | 1 | 2 | 34       | 1 | VVSSTSLFESSGKK                            |
| 68  | 450.7227  | 899.4308  | 899.4686  | -41.92 | 1 | 2 | 30       | 1 | GAAAGRGGGAR                               |
| 60  | 450.7193  | 899.4240  | 899.4647  | -45.20 | 0 | 2 | 26       | 1 | LNTHLMR + Oxidation (M)                   |
| 165 | 556.8359  | 1111.6572 | 1111.6713 | -12.66 | 1 | 2 | 19       | 1 | GVKALIQDIR                                |
| 454 | 897.9121  | 1793.8096 | 1793.7699 | 22.2   | 1 | 2 | 28       | 1 | MSYLKTTMEDEESSK + Oxidation (M)           |
| 101 | 506.2419  | 1010.4692 | 1010.4525 | 16.6   | 1 | 2 | 32       | 1 | RMDMDTVK + Oxidation (M)                  |
| 162 | 556.8341  | 1111.6536 | 1111.5986 | 49.6   | 1 | 2 | 21       | 1 | QPLSGTPKER                                |
| 532 | 762.0566  | 2283.1480 | 2283.2620 | -49.94 | 1 | 2 | 29       | 1 | EKSLVAQLAAQAQLQMTALR                      |
| 65  | 450.7219  | 899.4292  | 899.4647  | -39.42 | 0 | 2 | 31       | 1 | SLQHMLR + Oxidation (M)                   |
| 107 | 516.3027  | 1030.5908 | 1030.5593 | 30.6   | 0 | 2 | 42       | 1 | LMTGAGNVLR                                |
| 521 | 747.3854  | 2239.1344 | 2239.0625 | 32.1   | 1 | 2 | 32       | 1 | VACSGGAPGAGGRGGAGGAAAAGAGAAGR             |
| 106 | 516.2996  | 1030.5846 | 1030.5407 | 42.7   | 1 | 2 | 47       | 1 | ELDLTRER                                  |
| 9   | 575.3143  | 574.3070  | 574.2962  | 18.8   | 1 | 2 | 1.1e+002 | 1 | KDLEA                                     |
| 252 | 618.2717  | 1234.5288 | 1234.5724 | -35.29 | 1 | 2 | 24       | 1 | ADTSQPSARMR + Oxidation (M)               |
| 430 | 838.3983  | 1674.7820 | 1674.8246 | -25.43 | 1 | 2 | 41       | 1 | ALDGLQREAMEELGK + Oxidation (M)           |
| 525 | 762.0536  | 2283.1390 | 2283.1894 | -22.10 | 0 | 1 | 33       | 1 | EEVIDFSKPFMSLGISIMIK                      |
| 526 | 762.0540  | 2283.1402 | 2283.1190 | 9.26   | 1 | 1 | 33       | 1 | KGTTTATATSTSTASTAVADAQK                   |
| 480 | 688.3133  | 2061.9181 | 2061.9426 | -11.89 | 1 | 1 | 26       | 1 | SKGSQGTSPFFMSPSPDSR + Oxidation (M)       |
| 380 | 795.3489  | 1588.6832 | 1588.7515 | -42.96 | 1 | 1 | 19       | 1 | TPEVICERSQNK                              |
| 479 | 688.3128  | 2061.9166 | 2061.9426 | -12.61 | 1 | 1 | 25       | 1 | SKGSQGTSPFFMSPSPDSR + Oxidation (M)       |
| 259 | 627.2626  | 1252.5106 | 1252.5587 | -38.34 | 0 | 1 | 12       | 1 | VWNYFSYMK + Oxidation (M)                 |
| 8   | 562.3096  | 561.3023  | 561.3122  | -17.64 | 0 | 1 | 84       | 1 | TLGSGK                                    |
| 14  | 647.3585  | 646.3512  | 646.3438  | 11.4   | 0 | 1 | 93       | 1 | LYSHK                                     |
| 530 | 762.0560  | 2283.1462 | 2283.1205 | 11.2   | 0 | 1 | 39       | 1 | DWDPGLPIIDNLMQSIQSK                       |
| 444 | 882.9548  | 1763.8950 | 1763.8889 | 3.46   | 1 | 1 | 54       | 1 | NIPWRCVVIDEHR                             |
| 537 | 767.0458  | 2298.1156 | 2298.1525 | -16.07 | 1 | 1 | 39       | 1 | MSLSLEVATYRTLLEAENS + Oxidation (M)       |
| 587 | 1414.1199 | 2826.2252 | 2826.3139 | -31.38 | 1 | 1 | 16       | 1 | HGRAGVPMQMLMLGFEVDYTVR + 3 Oxidation (M)  |
| 102 | 506.2426  | 1010.4706 | 1010.4855 | -14.70 | 0 | 1 | 45       | 1 | SCLEFSLR                                  |
| 26  | 396.7331  | 791.4516  | 791.4177  | 42.8   | 0 | 0 | 55       | 1 | EFIGAQK                                   |
| 18  | 325.1862  | 648.3578  | 648.3629  | -7.74  | 1 | 0 | 73       | 1 | GLGMKK + Oxidation (M)                    |
| 504 | 546.7143  | 2182.8281 | 2182.8329 | -2.22  | 0 | 0 | 4.1      | 1 | CFPCPDGCPQMGHYADK + Oxidation (M)         |
| 339 | 692.3972  | 1382.7798 | 1382.7154 | 46.6   | 1 | 0 | 45       | 1 | KDPSQTSPLGTPR                             |
| 1   | 369.8990  | 368.8917  |           |        |   |   |          |   |                                           |
| 2   | 412.8516  | 411.8443  |           |        |   |   |          |   |                                           |
| 3   | 429.1010  | 428.0937  |           |        |   |   |          |   |                                           |
| 4   | 445.1302  | 444.1229  |           |        |   |   |          |   |                                           |
| 7   | 460.2643  | 459.2570  |           |        |   |   |          |   |                                           |
| 15  | 325.1771  | 648.3396  |           |        |   |   |          |   |                                           |
| 16  | 325.1830  | 648.3514  |           |        |   |   |          |   |                                           |
| 21  | 350.1520  | 698.2894  |           |        |   |   |          |   |                                           |
| 22  | 360.7044  | 719.3942  |           |        |   |   |          |   |                                           |
| 23  | 360.7065  | 719.3984  |           |        |   |   |          |   |                                           |
| 25  | 396.7322  | 791.4498  |           |        |   |   |          |   |                                           |
| 46  | 423.7246  | 845.4346  |           |        |   |   |          |   |                                           |
| 110 | 519.1532  | 1036.2918 |           |        |   |   |          |   |                                           |
| 122 | 528.3091  | 1054.6036 |           |        |   |   |          |   |                                           |
| 237 | 588.3435  | 1174.6724 |           |        |   |   |          |   |                                           |
| 287 | 648.3742  | 1294.7338 |           |        |   |   |          |   |                                           |
| 340 | 692.8701  | 1383.7256 |           |        |   |   |          |   |                                           |
| 341 | 692.8714  | 1383.7282 |           |        |   |   |          |   |                                           |
| 356 | 720.3672  | 1438.7198 |           |        |   |   |          |   |                                           |
| 366 | 736.4177  | 1470.8208 |           |        |   |   |          |   |                                           |
| 371 | 757.8600  | 1513.7054 |           |        |   |   |          |   |                                           |
| 372 | 766.3796  | 1530.7446 |           |        |   |   |          |   |                                           |
| 373 | 766.3809  | 1530.7472 |           |        |   |   |          |   |                                           |
| 374 | 775.8672  | 1549.7198 |           |        |   |   |          |   |                                           |
| 375 | 785.8416  | 1569.6686 |           |        |   |   |          |   |                                           |
| 376 | 785.8436  | 1569.6726 |           |        |   |   |          |   |                                           |
| 377 | 785.8450  | 1569.6754 |           |        |   |   |          |   |                                           |
| 378 | 785.8463  | 1569.6780 |           |        |   |   |          |   |                                           |
| 379 | 785.8502  | 1569.6858 |           |        |   |   |          |   |                                           |
| 393 | 810.3764  | 1618.7382 |           |        |   |   |          |   |                                           |
| 428 | 828.4725  | 1654.9304 |           |        |   |   |          |   |                                           |



|                                     |                     |           |           |
|-------------------------------------|---------------------|-----------|-----------|
| <input checked="" type="checkbox"/> | <a href="#">433</a> | 847.4376  | 1692.8606 |
| <input checked="" type="checkbox"/> | <a href="#">436</a> | 849.4251  | 1696.8356 |
| <input checked="" type="checkbox"/> | <a href="#">440</a> | 855.4716  | 1708.9286 |
| <input checked="" type="checkbox"/> | <a href="#">447</a> | 444.8585  | 1775.4049 |
| <input checked="" type="checkbox"/> | <a href="#">456</a> | 897.9154  | 1793.8162 |
| <input checked="" type="checkbox"/> | <a href="#">457</a> | 897.9534  | 1793.8922 |
| <input checked="" type="checkbox"/> | <a href="#">458</a> | 906.4670  | 1810.9194 |
| <input checked="" type="checkbox"/> | <a href="#">459</a> | 906.4675  | 1810.9204 |
| <input checked="" type="checkbox"/> | <a href="#">460</a> | 906.4682  | 1810.9218 |
| <input checked="" type="checkbox"/> | <a href="#">463</a> | 924.9924  | 1847.9702 |
| <input checked="" type="checkbox"/> | <a href="#">464</a> | 617.9799  | 1850.9179 |
| <input checked="" type="checkbox"/> | <a href="#">466</a> | 948.9913  | 1895.9680 |
| <input checked="" type="checkbox"/> | <a href="#">481</a> | 1036.4299 | 2070.8452 |
| <input checked="" type="checkbox"/> | <a href="#">482</a> | 1038.5869 | 2075.1592 |
| <input checked="" type="checkbox"/> | <a href="#">492</a> | 701.6434  | 2101.9084 |
| <input checked="" type="checkbox"/> | <a href="#">493</a> | 701.6444  | 2101.9114 |
| <input checked="" type="checkbox"/> | <a href="#">497</a> | 1062.4862 | 2122.9578 |
| <input checked="" type="checkbox"/> | <a href="#">505</a> | 1093.5850 | 2185.1554 |
| <input checked="" type="checkbox"/> | <a href="#">506</a> | 737.6982  | 2210.0728 |
| <input checked="" type="checkbox"/> | <a href="#">507</a> | 737.6986  | 2210.0740 |
| <input checked="" type="checkbox"/> | <a href="#">508</a> | 737.6988  | 2210.0746 |
| <input checked="" type="checkbox"/> | <a href="#">509</a> | 737.6998  | 2210.0776 |
| <input checked="" type="checkbox"/> | <a href="#">510</a> | 737.7000  | 2210.0782 |
| <input checked="" type="checkbox"/> | <a href="#">511</a> | 737.7000  | 2210.0782 |
| <input checked="" type="checkbox"/> | <a href="#">512</a> | 737.7003  | 2210.0791 |
| <input checked="" type="checkbox"/> | <a href="#">513</a> | 737.7007  | 2210.0803 |
| <input checked="" type="checkbox"/> | <a href="#">514</a> | 737.7010  | 2210.0812 |
| <input checked="" type="checkbox"/> | <a href="#">515</a> | 737.7013  | 2210.0821 |
| <input checked="" type="checkbox"/> | <a href="#">516</a> | 737.7016  | 2210.0830 |
| <input checked="" type="checkbox"/> | <a href="#">517</a> | 737.7018  | 2210.0836 |
| <input checked="" type="checkbox"/> | <a href="#">518</a> | 737.7018  | 2210.0836 |
| <input checked="" type="checkbox"/> | <a href="#">519</a> | 737.7036  | 2210.0890 |
| <input checked="" type="checkbox"/> | <a href="#">523</a> | 761.7198  | 2282.1376 |
| <input checked="" type="checkbox"/> | <a href="#">524</a> | 761.7235  | 2282.1487 |
| <input checked="" type="checkbox"/> | <a href="#">527</a> | 762.0549  | 2283.1429 |
| <input checked="" type="checkbox"/> | <a href="#">528</a> | 762.0551  | 2283.1435 |
| <input checked="" type="checkbox"/> | <a href="#">529</a> | 762.0555  | 2283.1447 |
| <input checked="" type="checkbox"/> | <a href="#">531</a> | 762.0562  | 2283.1468 |
| <input checked="" type="checkbox"/> | <a href="#">533</a> | 762.0594  | 2283.1564 |
| <input checked="" type="checkbox"/> | <a href="#">534</a> | 1144.1368 | 2286.2590 |
| <input checked="" type="checkbox"/> | <a href="#">535</a> | 767.0423  | 2298.1051 |
| <input checked="" type="checkbox"/> | <a href="#">536</a> | 767.0435  | 2298.1087 |
| <input checked="" type="checkbox"/> | <a href="#">538</a> | 779.0403  | 2334.0991 |
| <input checked="" type="checkbox"/> | <a href="#">539</a> | 1168.5659 | 2335.1172 |
| <input checked="" type="checkbox"/> | <a href="#">557</a> | 1259.6788 | 2517.3430 |
| <input checked="" type="checkbox"/> | <a href="#">574</a> | 916.4235  | 2746.2487 |
| <input checked="" type="checkbox"/> | <a href="#">575</a> | 916.4275  | 2746.2607 |
| <input checked="" type="checkbox"/> | <a href="#">577</a> | 917.0772  | 2748.2098 |
| <input checked="" type="checkbox"/> | <a href="#">578</a> | 917.0789  | 2748.2149 |
| <input checked="" type="checkbox"/> | <a href="#">579</a> | 917.0808  | 2748.2206 |
| <input checked="" type="checkbox"/> | <a href="#">580</a> | 917.0855  | 2748.2347 |
| <input checked="" type="checkbox"/> | <a href="#">581</a> | 922.4243  | 2764.2511 |
| <input checked="" type="checkbox"/> | <a href="#">582</a> | 927.0934  | 2778.2584 |
| <input checked="" type="checkbox"/> | <a href="#">583</a> | 927.7480  | 2780.2222 |
| <input checked="" type="checkbox"/> | <a href="#">588</a> | 1414.1230 | 2826.2314 |
| <input checked="" type="checkbox"/> | <a href="#">589</a> | 1415.1056 | 2828.1966 |
| <input checked="" type="checkbox"/> | <a href="#">590</a> | 1415.1093 | 2828.2040 |
| <input checked="" type="checkbox"/> | <a href="#">591</a> | 975.8646  | 2924.5720 |
| <input checked="" type="checkbox"/> | <a href="#">592</a> | 1015.5191 | 3043.5355 |
| <input checked="" type="checkbox"/> | <a href="#">593</a> | 1179.7867 | 4715.1177 |
| <input checked="" type="checkbox"/> | <a href="#">594</a> | 1572.7246 | 4715.1520 |

### Search Parameters

Type of search : MS/MS Ion Search  
Enzyme : Trypsin  
Fixed modifications : Carbamidomethyl (C)  
Variable modifications : Oxidation (M)  
Mass values : Monoisotopic  
Protein Mass : Unrestricted  
Peptide Mass Tolerance :  $\pm 50$  ppm  
Fragment Mass Tolerance :  $\pm 0.2$  Da  
Max Missed Cleavages : 1  
Instrument type : ESI-QUAD-TOF  
Number of queries : 594

Mascot: <http://www.matrixscience.com/>
